# Supplementary material for: Multiomic screening of invasive GBM cells reveals targetable transsulfuration pathway alterations
Source: PubMed Central journal article supplement (PMC10849762; doi:10.1172/jci170397), 2024-02-01
Supplement: jci-134-170397-s087.pdf [file jci-134-170397-s087.pdf]

SUPPLEMENTAL TABLE 5. Results of bulk RNA-sequencing comparing invasive vs. core cells in 3D hydrogels. Shown are the results of bulk RNA-seq comparing edge vs. core fractions after GBM43 cells invaded 3D hydrogels.

| gene_id                            | NT_INV1                                      | NT_INV2        | NT_INV3        | NT_CORE1       | NT_CORE2 |  |        |
|------------------------------------|----------------------------------------------|----------------|----------------|----------------|----------|--|--------|
| NT_CORE3                           | WT_Invasive                                  | Wt_Core        | log2FoldChange | pvalue         | padj     |  |        |
| gene_name                          | gene_chr                                     | gene_start     | gene_end       |                |          |  |        |
| gene_strand                        | gene_length                                  | gene_biotype   |                |                |          |  |        |
| gene_description                   | tf_family                                    | NT_INV1_count  | NT_INV2_count  |                |          |  |        |
|                                    | NT_INV3_count                                | NT_CORE1_count | NT_CORE2_count | NT_CORE3_count |          |  |        |
|                                    | NT_INV1_fpk                                  | NT_INV2_fpk    | NT_INV3_fpk    | NT_CORE1_fpk   |          |  |        |
|                                    | NT_CORE2_fpk                                 | NT_CORE3_fpk   |                |                |          |  |        |
| ENSG00000141753                    | 3110.963562                                  | 2740.829989    | 3411.912992    |                |          |  |        |
| 589.4660736                        | 681.4706214                                  | 546.0505157    | 3087.902181    |                |          |  |        |
| 605.6624036                        | 2.3510759                                    | 1.75E-50       | 3.09E-46       |                |          |  | IGFBP4 |
| 17                                 | 40443461                                     | 40457731       | +              | 2200           |          |  |        |
| protein_coding                     | insulin like growth factor binding protein 4 |                |                |                |          |  |        |
| [Source:HGNC Symbol;Acc:HGNC:5473] | -                                            | 3429           | 3097           |                |          |  | 2935   |
| 569                                | 597                                          | 633            | 76.32617308    | 66.70293832    |          |  |        |
| 83.00270986                        | 14.37148445                                  | 16.68011385    | 13.37864245    |                |          |  |        |
| ENSG00000134871                    | 6106.706252                                  | 6013.542065    | 8497.813961    |                |          |  |        |
| 1483.506885                        | 1518.184131                                  | 1337.09052     | 6872.687426    |                |          |  |        |
| 1446.260512                        | 2.248631173                                  | 1.23E-45       | 1.09E-41       |                |          |  | COL4A2 |
| 13                                 | 110305812                                    | 110513209      | +              | 19293          |          |  |        |
| protein_coding                     | collagen type IV alpha 2 chain               |                |                |                |          |  |        |
| [Source:HGNC Symbol;Acc:HGNC:2203] | -                                            | 6731           | 6795           | 7310           | 1432     |  | 1330   |
| 1550                               | 17.08474534                                  | 16.68845521    | 23.57352125    |                |          |  |        |
| 4.12434795                         | 4.237397801                                  | 3.735622237    |                |                |          |  |        |
| ENSG00000114270                    | 3686.160675                                  | 4517.015262    | 4357.018704    |                |          |  |        |
| 1186.183927                        | 1189.434485                                  | 1002.386571    | 4186.731547    |                |          |  |        |
| 1126.001661                        | 1.895226338                                  | 3.45E-38       | 2.04E-34       |                |          |  | COL7A1 |
| 3                                  | 48564073                                     | 48595267       | -              | 11071          |          |  |        |
| protein_coding                     | collagen type VII alpha 1 chain              |                |                |                |          |  |        |
| [Source:HGNC Symbol;Acc:HGNC:2214] | -                                            | 4063           | 5104           | 3748           | 1145     |  | 1042   |
| 1162                               | 17.97167909                                  | 21.8449098     | 21.06296849    |                |          |  |        |
| 5.746860823                        | 5.785331224                                  | 4.88034243     |                |                |          |  |        |
| ENSG00000084636                    | 1758.252372                                  | 1560.246455    | 2176.184369    |                |          |  |        |
| 304.5747375                        | 196.3365944                                  | 144.0607206    | 1831.561065    |                |          |  |        |
| 214.9906842                        | 3.092903409                                  | 5.43E-38       | 2.40E-34       |                |          |  |        |
| COL16A1                            | 1                                            | 31652247       | 31704319       | -              | 9269     |  |        |
| protein_coding                     | collagen type XVI alpha 1 chain              |                |                |                |          |  |        |
| [Source:HGNC Symbol;Acc:HGNC:2193] | -                                            | 1938           | 1763           | 1872           | 294      |  | 172    |
| 167                                | 10.23881213                                  | 9.012512311    | 12.56550099    |                |          |  |        |
| 1.762489311                        | 1.140625102                                  | 0.837750329    |                |                |          |  |        |
| ENSG00000184371                    | 5901.667534                                  | 5021.462499    | 5686.909151    |                |          |  |        |
| 1705.204143                        | 1600.371543                                  | 1229.26064     | 5536.679728    |                |          |  |        |

|                        |                                                      |             |                 |       |
|------------------------|------------------------------------------------------|-------------|-----------------|-------|
| 1511.612108            | 1.873599345                                          | 3.62E-34    | 1.28E-30        | CSF1  |
| 1                      | 109910242                                            | 109930992   | + 5418          |       |
| protein_coding         | colony stimulating factor 1 [Source:HGNC             |             |                 |       |
| Symbol;Acc:HGNC:2432]  | -                                                    | 6505 5674   | 4892 1646       | 1402  |
| 1425                   | 58.79453823                                          | 49.62228647 | 56.17645042     |       |
| 16.88118284            | 15.90583134                                          | 12.22944876 |                 |       |
| ENSG00000157168        | 1046.060364                                          | 1000.929518 | 1106.692051     |       |
| 243.4525963            | 256.8356613                                          | 235.5004594 | 1051.227311     |       |
| 245.2629057            | 2.100295425                                          | 6.07E-31    | 1.79E-27        | NRG1  |
| 8                      | 31639386                                             | 32767959    | + 11328         |       |
| protein_coding         | neuregulin 1 [Source:HGNC Symbol;Acc:HGNC:7997]      |             |                 | -     |
| 1153                   | 1131 952                                             | 235 225     | 273 4.984306614 |       |
| 4.73081326             | 5.228661835                                          | 1.152727531 | 1.220890285     |       |
| 1.120573699            |                                                      |             |                 |       |
| ENSG00000103888        | 731.2442786                                          | 452.2325232 | 700.9824649     |       |
| 81.8415111             | 65.06503421                                          | 66.42320649 | 628.1530889     |       |
| 71.10991726            | 3.142767227                                          | 1.73E-30    | 4.38E-27        | CEMIP |
| 15                     | 80779343                                             | 80951776    | + 7621          |       |
| protein_coding         | cell migration inducing hyaluronidase 1 [Source:HGNC |             |                 |       |
| Symbol;Acc:HGNC:29213] | -                                                    | 806 511     | 603 79          | 57    |
| 77                     | 5.179069795                                          | 3.177132882 | 4.922800059     |       |
| 0.57600622             | 0.459737843                                          | 0.469796505 |                 |       |
| ENSG00000164104        | 4482.727023                                          | 4224.081866 | 4772.028223     |       |
| 1322.931768            | 1049.03099                                           | 733.2431885 | 4492.945704     |       |
| 1035.068649            | 2.118808483                                          | 1.03E-29    | 2.27E-26        | HMGB2 |
| 4                      | 173331695                                            | 173335125   | - 2775          |       |
| protein_coding         | high mobility group box 2 [Source:HGNC               |             |                 |       |
| Symbol;Acc:HGNC:5000]  | HMG                                                  | 4941 4773   | 4105 1277       | 919   |
| 850                    | 87.19278508                                          | 81.49948938 | 92.03584852     |       |
| 25.57054317            | 20.35634882                                          | 14.24252388 |                 |       |
| ENSG00000182871        | 1147.672472                                          | 1191.203476 | 2473.782231     |       |
| 197.8699825            | 218.0249392                                          | 253.6158793 | 1604.219393     |       |
| 223.170267             | 2.843690409                                          | 7.48E-27    | 1.47E-23        |       |
| COL18A1 21             | 45405137                                             | 45513720    | + 8525          |       |
| protein_coding         | collagen type XVIII alpha 1 chain [Source:HGNC       |             |                 |       |
| Symbol;Acc:HGNC:2195]  | -                                                    | 1265 1346   | 2128 191        | 191   |
| 294                    | 7.266492362                                          | 7.481300737 | 15.53045153     |       |
| 1.244947459            | 1.377166151                                          | 1.603555371 |                 |       |
| ENSG00000133216        | 1535.068634                                          | 1346.962623 | 1773.962258     |       |
| 455.8261378            | 381.2582706                                          | 326.0775591 | 1551.997838     |       |
| 387.7206558            | 2.001752736                                          | 5.64E-26    | 9.98E-23        | EPHB2 |
| 1                      | 22710839                                             | 22921500    | + 12516         |       |
| protein_coding         | EPH receptor B2 [Source:HGNC Symbol;Acc:HGNC:3393]   |             |                 |       |
| -                      | 1692 1522                                            | 1526 440    | 334 378         |       |
| 6.620083812            | 5.762030314                                          | 7.58570284  | 1.953435904     |       |
| 1.640318838            | 1.404291488                                          |             |                 |       |
| ENSG00000166033        | 4646.939448                                          | 4546.220102 | 7188.848363     |       |
| 1303.248367            | 1305.866651                                          | 706.5013781 | 5460.669304     |       |
| 1105.205465            | 2.305532345                                          | 6.65E-25    | 1.07E-21        | HTRA1 |
| 10                     | 122458551                                            | 122514908   | + 2279          |       |

|                                    |                                                    |             |             |             |             |                |
|------------------------------------|----------------------------------------------------|-------------|-------------|-------------|-------------|----------------|
| protein_coding                     | HtrA serine peptidase 1 [Source:HGNC               |             |             |             |             |                |
| Symbol;Acc:HGNC:9476]              | -                                                  | 5122        | 5137        | 6184        | 1258        | 1144           |
| 819                                | 110.0585869                                        | 106.8050239 |             | 168.8231512 |             |                |
| 30.6724424                         | 30.85524928                                        | 16.70977472 |             |             |             |                |
| ENSG00000116962                    | 858.2594138                                        | 638.9665006 |             | 1047.404977 |             |                |
| 177.1506126                        | 135.8375276                                        | 144.0607206 |             | 848.210297  |             |                |
| 152.3496202                        | 2.475977465                                        | 9.38E-25    |             | 1.38E-21    |             | NID1           |
| 1                                  | 235975830                                          | 236065162   |             | -           | 5864        |                |
| protein_coding                     | nidogen 1 [Source:HGNC Symbol;Acc:HGNC:7821]       |             |             |             |             | -              |
| 946                                | 722                                                | 901         | 171         | 119         | 167         | 7.899977572    |
| 5.834043685                        | 9.559554994                                        | 1.620369994 |             | 1.247384548 |             |                |
| 1.32419983                         |                                                    |             |             |             |             |                |
| ENSG00000197594                    | 3680.717169                                        | 3043.498332 |             | 3200.339512 |             |                |
| 970.7024797                        | 699.7344907                                        | 446.8470255 |             | 3308.185004 |             |                |
| 705.7613319                        | 2.230032293                                        | 3.13E-24    |             | 3.87E-21    |             | ENPP1          |
| 6                                  | 131808016                                          | 131895155   |             | +           | 9959        |                |
| protein_coding                     | ectonucleotide pyrophosphatase/phosphodiesterase 1 |             |             |             |             |                |
| [Source:HGNC Symbol;Acc:HGNC:3356] | -                                                  |             |             | 4057        | 3439        | 2753           |
| 937                                | 613                                                | 518         | 19.94885432 | 16.36224474 |             |                |
| 17.1987675                         | 5.228003891                                        | 3.783485748 |             | 2.418494174 |             |                |
| ENSG00000186193                    | 1011.584827                                        | 967.2997024 |             | 993.9303607 |             |                |
| 297.322958                         | 234.0058248                                        | 254.4785184 |             | 990.9382967 |             |                |
| 261.9357671                        | 1.919151493                                        | 3.18E-24    |             | 3.87E-21    |             | SAPCD2         |
| 9                                  | 137062124                                          | 137070588   |             | -           | 3848        |                |
| protein_coding                     | suppressor APC domain containing 2 [Source:HGNC    |             |             |             |             |                |
| Symbol;Acc:HGNC:28055]             | -                                                  | 1115        | 1093        | 855         | 287         | 205            |
| 295                                | 14.18954559                                        | 13.45896115 |             | 13.82413283 |             |                |
| 4.144373395                        | 3.27465957                                         | 3.564658834 |             |             |             |                |
| ENSG00000085117                    | 2050.387183                                        | 2209.832897 |             | 3206.15197  |             |                |
| 722.0700409                        | 647.2258666                                        | 645.2540059 |             | 2488.790684 |             |                |
| 671.5166378                        | 1.889433538                                        | 3.28E-24    |             | 3.87E-21    |             | CD82           |
| 11                                 | 44564427                                           | 44620363    |             | +           | 4054        |                |
| protein_coding                     | CD82 molecule [Source:HGNC Symbol;Acc:HGNC:6210]   |             |             |             |             |                |
| -                                  | 2260                                               | 2497        | 2758        | 697         | 567         | 748            |
| 27.29941737                        | 29.18510357                                        | 42.32698791 |             | 9.553468531 |             |                |
| 8.596995012                        | 8.579241076                                        |             |             |             |             |                |
| ENSG00000111206                    | 2575.685492                                        | 1881.499696 |             | 2398.220274 |             |                |
| 731.3937574                        | 570.7459141                                        | 467.5503625 |             | 2285.135154 |             |                |
| 589.896678                         | 1.954580622                                        | 6.21E-24    |             | 6.74E-21    |             | FOXM1          |
| 12                                 | 2857681                                            | 2877155     | -           | 4899        |             | protein_coding |
| forkhead box M1                    | [Source:HGNC Symbol;Acc:HGNC:3818]                 |             |             |             | Fork        | 2839           |
| 2126                               | 2063                                               | 706         | 500         | 542         | 28.37831706 |                |
| 20.56280048                        | 26.19983976                                        | 8.007727858 |             | 6.273500329 |             |                |
| 5.144259464                        |                                                    |             |             |             |             |                |
| ENSG00000186185                    | 1671.156279                                        | 1466.436969 |             | 1604.238477 |             |                |
| 482.7613186                        | 397.2391562                                        | 287.2588021 |             | 1580.610575 |             |                |
| 389.0864256                        | 2.024241687                                        | 6.47E-24    |             | 6.74E-21    |             | KIF18B         |
| 17                                 | 44924709                                           | 44947711    |             | -           | 4655        |                |
| protein_coding                     | kinesin family member 18B [Source:HGNC             |             |             |             |             |                |
| Symbol;Acc:HGNC:27102]             | -                                                  | 1842        | 1657        | 1380        | 466         | 348            |

|                       |                                                    |             |             |         |
|-----------------------|----------------------------------------------------|-------------|-------------|---------|
| 333                   | 19.3775392                                         | 16.86666674 | 18.44447286 |         |
| 5.562605681           | 4.595226459                                        | 3.326255199 |             |         |
| ENSG00000189403       | 11226.32345                                        | 11212.00359 | 13055.94372 |         |
| 5324.878064           | 4723.493185                                        | 4963.625067 | 11831.42359 |         |
| 5003.998772           | 1.241332431                                        | 3.59E-23    | 3.52E-20    | HMGB1   |
| 13                    | 30456704                                           | 30617597    | - 7723      |         |
| protein_coding        | high mobility group box 1 [Source:HGNC             |             |             |         |
| Symbol;Acc:HGNC:4983] | HMG                                                | 12374 12669 | 11231 5140  | 4138    |
| 5754                  | 78.46080514                                        | 77.72893945 | 90.47721813 |         |
| 36.98189216           | 32.9345559                                         | 34.64294791 |             |         |
| ENSG00000187498       | 3329.611045                                        | 2784.194752 | 4044.30845  |         |
| 984.1700702           | 679.1876378                                        | 451.1602207 | 3386.038082 |         |
| 704.8393095           | 2.265072381                                        | 5.31E-23    | 4.94E-20    | COL4A1  |
| 13                    | 110148963                                          | 110307233   | - 14738     |         |
| protein_coding        | collagen type IV alpha 1 chain [Source:HGNC        |             |             |         |
| Symbol;Acc:HGNC:2202] | -                                                  | 3670 3146   | 3479 950    | 595     |
| 523                   | 12.19428092                                        | 10.11455096 | 14.68664925 |         |
| 3.581765069           | 2.481565677                                        | 1.650038793 |             |         |
| ENSG00000072571       | 1421.662264                                        | 1071.72913  | 1185.741483 |         |
| 306.6466745           | 195.1951026                                        | 131.9837739 | 1226.377626 |         |
| 211.2751837           | 2.539851587                                        | 1.82E-22    | 1.61E-19    | HMMR    |
| 5                     | 163460203                                          | 163491945   | + 3936      |         |
| protein_coding        | hyaluronan mediated motility receptor [Source:HGNC |             |             |         |
| Symbol;Acc:HGNC:5012] | -                                                  | 1567 1211   | 1020 296    | 171     |
| 153                   | 19.49586865                                        | 14.57858906 | 16.12322552 |         |
| 4.178771893           | 2.670474165                                        | 1.807454441 |             |         |
| ENSG00000166851       | 2517.621431                                        | 2088.588561 | 2744.642785 |         |
| 568.7467037           | 610.6981281                                        | 270.8686602 | 2450.284259 |         |
| 483.4378307           | 2.343825006                                        | 2.05E-22    | 1.73E-19    | PLK1    |
| 16                    | 23677656                                           | 23690367    | + 4760      |         |
| protein_coding        | polo like kinase 1 [Source:HGNC                    |             |             |         |
| Symbol;Acc:HGNC:9077] | -                                                  | 2775 2360   | 2361 549    | 535 314 |
| 28.5485936            | 23.49262201                                        | 30.8599971  | 6.408810575 |         |
| 6.908665878           | 3.067282053                                        |             |             |         |
| ENSG00000115163       | 430.9442088                                        | 420.3726977 | 490.5714763 |         |
| 37.29486582           | 74.19696883                                        | 28.46708849 | 447.2961276 |         |
| 46.65297438           | 3.275462311                                        | 4.17E-22    | 3.35E-19    | CENPA   |
| 2                     | 26764289                                           | 26801067    | + 1983      |         |
| protein_coding        | centromere protein A [Source:HGNC                  |             |             |         |
| Symbol;Acc:HGNC:1851] | -                                                  | 475 475     | 422 36      | 65      |
| 33                    | 11.73004232                                        | 11.35003854 | 13.24026213 |         |
| 1.008769238           | 2.014828116                                        | 0.773788452 |             |         |
| ENSG00000117650       | 1049.689368                                        | 818.6205166 | 1035.78006  |         |
| 269.3518087           | 210.0344964                                        | 163.0387796 | 968.0299814 |         |
| 214.1416949           | 2.178483743                                        | 1.10E-21    | 8.48E-19    | NEK2    |
| 1                     | 211658657                                          | 211675630   | - 3095      |         |
| protein_coding        | NIMA related kinase 2 [Source:HGNC                 |             |             |         |
| Symbol;Acc:HGNC:7745] | -                                                  | 1157 925    | 891 260     | 184     |
| 189                   | 18.30633431                                        | 14.16144338 | 17.91116758 |         |
| 4.667934337           | 3.654302793                                        | 2.839436554 |             |         |

|                                      |                                                |        |             |      |             |             |        |
|--------------------------------------|------------------------------------------------|--------|-------------|------|-------------|-------------|--------|
| ENSG00000113721                      | 3916.60242                                     |        | 2837.294461 |      | 5448.598363 |             |        |
| 1050.472054                          | 981.6829722                                    |        | 589.1824679 |      | 4067.498415 |             |        |
| 873.7791647                          | 2.219488168                                    |        | 1.27E-21    |      | 9.36E-19    |             | PDGFRB |
| 5                                    | 150113837                                      |        | 150155872   |      | -           | 7137        |        |
| protein_coding                       | platelet derived growth factor receptor beta   |        |             |      |             |             |        |
| [Source:HGNC Symbol;Acc:HGNC:8804]   |                                                |        | -           |      | 4317        | 3206        | 4687   |
| 1014                                 | 860                                            | 683    | 29.62068076 |      | 21.28502978 |             |        |
| 40.85884665                          | 7.894675832                                    |        | 7.406791418 |      | 4.449754235 |             |        |
| ENSG00000115884                      | 1595.854449                                    |        | 1374.397473 |      | 1786.749666 |             |        |
| 481.7253501                          | 431.483911                                     |        | 288.1214411 |      | 1585.667196 |             |        |
| 400.4435674                          | 1.987200186                                    |        | 1.48E-21    |      | 1.05E-18    |             | SDC1   |
| 2                                    | 20200797                                       |        | 20225433    |      | -           | 3595        |        |
| protein_coding                       | syndecan 1 [Source:HGNC Symbol;Acc:HGNC:10658] |        |             |      |             |             | -      |
| 1759                                 | 1553                                           | 1537   | 465         | 378  | 334         | 23.9604863  |        |
| 20.46911198                          | 26.60001119                                    |        | 7.187305445 |      | 6.463090918 |             |        |
| 4.319948707                          |                                                |        |             |      |             |             |        |
| ENSG00000143228                      | 1883.453005                                    |        | 1319.527773 |      | 1619.350868 |             |        |
| 459.9700117                          | 280.8069897                                    |        | 219.1103175 |      | 1607.443882 |             |        |
| 319.9624397                          | 2.330186944                                    |        | 1.64E-21    |      | 1.12E-18    |             | NUF2   |
| 1                                    | 163266576                                      |        | 163355764   |      | +           | 3362        |        |
| protein_coding                       | "NUF2, NDC80 kinetochore complex component     |        |             |      |             |             |        |
| [Source:HGNC Symbol;Acc:HGNC:14621]" |                                                |        | -           |      | 2076        | 1491        | 1393   |
| 444                                  | 246                                            | 254    | 30.2383663  |      | 21.01388616 |             |        |
| 25.77865498                          | 7.33833113                                     |        | 4.497640699 |      | 3.512910018 |             |        |
| ENSG00000138778                      | 1799.078666                                    |        | 980.5746297 |      | 1210.153808 |             |        |
| 300.4308635                          | 148.3939377                                    |        | 123.3573835 |      | 1329.935701 |             |        |
| 190.7273949                          | 2.803360796                                    |        | 3.37E-21    |      | 2.21E-18    |             | CENPE  |
| 4                                    | 103105806                                      |        | 103198409   |      | -           | 9444        |        |
| protein_coding                       | centromere protein E [Source:HGNC              |        |             |      |             |             |        |
| Symbol;Acc:HGNC:1856]                |                                                |        | -           | 1983 | 1108        | 1041        | 290    |
| 143                                  | 10.2824219                                     |        | 5.559173428 |      | 6.858065011 |             | 130    |
| 1.706294784                          | 0.846125403                                    |        | 0.704062279 |      |             |             |        |
| ENSG00000157456                      | 1290.110874                                    |        | 1046.949266 |      | 1571.688711 |             |        |
| 387.4522171                          | 310.4857773                                    |        | 255.3411574 |      | 1302.916283 |             |        |
| 317.7597173                          | 2.036480713                                    |        | 4.47E-21    |      | 2.83E-18    |             | CCNB2  |
| 15                                   | 59105078                                       |        | 59125045    |      | +           | 2801        |        |
| protein_coding                       | cyclin B2 [Source:HGNC Symbol;Acc:HGNC:1580]   |        |             |      |             |             | -      |
| 1422                                 | 1183                                           | 1352   | 374         | 272  | 296         | 24.86080408 |        |
| 20.0123494                           | 30.03104394                                    |        | 7.419429919 |      | 5.969021668 |             |        |
| 4.913711119                          |                                                |        |             |      |             |             |        |
| ENSG00000248527                      | 1362.690951                                    |        | 1194.743457 |      | 819.5566132 |             |        |
| 3597.918583                          | 3535.200192                                    |        | 3457.457293 |      | 1125.663674 |             |        |
| 3530.192023                          | -1.647642964                                   |        | 1.81E-20    |      | 1.11E-17    |             |        |
| MTATP6P1                             | 1                                              | 633696 | 634376      | +    | 681         |             |        |
| unprocessed_pseudogene               | MT-ATP6 pseudogene 1 [Source:HGNC              |        |             |      |             |             |        |
| Symbol;Acc:HGNC:44575]               |                                                |        | -           | 1502 | 1350        | 705         | 3473   |
| 4008                                 | 108.0069008                                    |        | 93.93189791 |      | 64.4093404  |             | 3097   |
| 283.3803387                          | 279.5383862                                    |        | 273.6601868 |      |             |             |        |
| ENSG00000198763                      | 40008.86035                                    |        | 41950.54025 |      | 26412.97278 |             |        |
| 87652.25839                          | 131773.8166                                    |        | 133922.9865 |      | 36124.12446 |             |        |

|                                                                       |                                                    |                           |                   |        |
|-----------------------------------------------------------------------|----------------------------------------------------|---------------------------|-------------------|--------|
| 117783.0205                                                           | -1.705060657                                       | 5.45E-20                  | 3.21E-17          | MT-ND2 |
| MT                                                                    | 4470 5511                                          | + 1042                    | protein_coding    |        |
| mitochondrially encoded NADH:ubiquinone oxidoreductase core subunit 2 |                                                    |                           |                   |        |
| [Source:HGNC Symbol;Acc:HGNC:7456]                                    |                                                    | -                         | 44099 47402 22721 |        |
| 84609                                                                 | 115440 155248                                      | 2072.476935               | 2155.536533       |        |
| 1356.646096                                                           | 4511.914766                                        | 6809.825123               | 6927.703839       |        |
| ENSG0000004399                                                        | 3573.661555                                        | 2935.528923               | 4194.269873       |        |
| 1212.083139                                                           | 1392.62003                                         | 1058.458109               | 3567.820117       |        |
| 1221.053759                                                           | 1.547308653                                        | 5.80E-20                  | 3.31E-17          | PLXND1 |
| 3                                                                     | 129555175                                          | 129606818                 | - 9738            |        |
| protein_coding                                                        | plexin D1 [Source:HGNC Symbol;Acc:HGNC:9107]       |                           | -                 |        |
| 3939                                                                  | 3317 3608                                          | 1170 1220                 | 1227 19.80819461  |        |
| 16.13994841                                                           | 23.05173431                                        | 6.676181503               | 7.700827951       |        |
| 5.858761387                                                           |                                                    |                           |                   |        |
| ENSG00000088325                                                       | 6920.510368                                        | 5523.254751               | 6614.577488       |        |
| 2854.093203                                                           | 2334.350789                                        | 2094.487602               | 6352.780869       |        |
| 2427.643865                                                           | 1.388000406                                        | 1.56E-19                  | 8.62E-17          | TPX2   |
| 20                                                                    | 31739271                                           | 31801805                  | + 3605            |        |
| protein_coding                                                        | "TPX2, microtubule nucleation factor [Source:HGNC  |                           |                   |        |
| Symbol;Acc:HGNC:1249]"                                                | -                                                  | 7628 6241                 | 5690 2755 2045    |        |
| 2428                                                                  | 103.617736                                         | 82.03049918               | 98.20053276       |        |
| 42.46473105                                                           | 34.8686717                                         | 31.31658747               |                   |        |
| ENSG00000134222                                                       | 822.8766261                                        | 777.0257444               | 897.4435537       |        |
| 243.4525963                                                           | 202.0440536                                        | 143.1980815               | 832.4486414       |        |
| 196.2315771                                                           | 2.087542652                                        | 1.66E-19                  | 8.91E-17          | PSRC1  |
| 1                                                                     | 109279556                                          | 109283186                 | - 2855            |        |
| protein_coding                                                        | proline and serine rich coiled-coil 1 [Source:HGNC |                           |                   |        |
| Symbol;Acc:HGNC:24472]                                                | -                                                  | 907 878                   | 772 235 177       |        |
| 166                                                                   | 15.55714351                                        | 14.5718551                | 16.82356515       |        |
| 4.573764437                                                           | 3.810785587                                        | 2.703541208               |                   |        |
| ENSG00000132967                                                       | 1252.913584                                        | 1395.637356               | 1708.862725       |        |
| 483.7972871                                                           | 469.1531414                                        | 485.6657825               | 1452.471222       |        |
| 479.538737                                                            | 1.597902766                                        | 1.76E-19                  | 9.14E-17          |        |
| HMGB1P5 3                                                             | 22381819                                           | 22382929                  | + 1111            |        |
| transcribed_processed_pseudogene                                      |                                                    | high mobility group box 1 |                   |        |
| pseudogene 5 [Source:HGNC Symbol;Acc:HGNC:4997]                       |                                                    | -                         | 1381 1577         |        |
| 1470                                                                  | 467 411                                            | 563 60.870701             | 67.25801956       |        |
| 82.32090238                                                           | 23.35688192                                        | 22.73919695               | 23.56271629       |        |
| ENSG00000163359                                                       | 26821.96756                                        | 21721.32104               | 35328.12124       |        |
| 9530.910153                                                           | 8483.567267                                        | 5007.619658               | 27957.13661       |        |
| 7674.032359                                                           | 1.865262061                                        | 4.04E-19                  | 2.04E-16          | COL6A3 |
| 2                                                                     | 237324003                                          | 237414375                 | - 19633           |        |
| protein_coding                                                        | collagen type VI alpha 3 chain [Source:HGNC        |                           |                   |        |
| Symbol;Acc:HGNC:2213]                                                 | -                                                  | 29564 24544               | 30390 9200 7432   |        |
| 5805                                                                  | 73.74035271                                        | 59.23591708               | 96.30545338       |        |
| 26.03833465                                                           | 23.26839323                                        | 13.74822324               |                   |        |
| ENSG00000112984                                                       | 1600.390704                                        | 1062.879179               | 1653.063126       |        |
| 401.955776                                                            | 219.166431                                         | 169.0772529               | 1438.77767        |        |
| 263.39982                                                             | 2.450713662                                        | 4.36E-19                  | 2.14E-16          | KIF20A |
| 5                                                                     | 138178719                                          | 138187715                 | + 3958            |        |

|                       |                                                       |             |             |             |                |             |
|-----------------------|-------------------------------------------------------|-------------|-------------|-------------|----------------|-------------|
| protein_coding        | kinesin family member 20A [Source:HGNC                |             |             |             |                |             |
| Symbol;Acc:HGNC:9787] | -                                                     | 1764        | 1201        | 1422        | 388            | 192         |
| 196                   | 21.8248604                                            | 14.3778404  | 22.35273416 |             |                |             |
| 5.447133              | 2.981760787                                           | 2.302561823 |             |             |                |             |
| ENSG00000087586       | 2479.51689                                            | 2023.09892  | 2486.569639 |             |                |             |
| 801.8396151           | 422.3519764                                           | 368.3468723 | 2329.728483 |             |                |             |
| 530.8461546           | 2.13438139                                            | 5.08E-19    | 2.43E-16    |             |                | AURKA       |
| 20                    | 56369389                                              | 56392337    | -           | 2928        |                |             |
| protein_coding        | aurora kinase A [Source:HGNC Symbol;Acc:HGNC:11393]   |             |             |             |                |             |
| -                     | 2733                                                  | 2286        | 2139        | 774         | 370            | 427         |
| 45.70852878           | 36.99402575                                           | 45.4513261  | 14.68865167 |             |                |             |
| 7.767441872           | 6.78090751                                            |             |             |             |                |             |
| ENSG00000164176       | 3274.268736                                           | 2229.302791 | 4322.143954 |             |                |             |
| 945.8392358           | 940.5892664                                           | 639.2155325 | 3275.238494 |             |                |             |
| 841.8813449           | 1.960406584                                           | 6.67E-19    | 3.10E-16    |             |                | EDIL3       |
| 5                     | 83940554                                              | 84384793    | -           | 5738        |                |             |
| protein_coding        | EGF like repeats and discoidin domains 3 [Source:HGNC |             |             |             |                |             |
| Symbol;Acc:HGNC:3173] | -                                                     | 3609        | 2519        | 3718        | 913            | 824         |
| 741                   | 30.80030532                                           | 20.8014718  | 40.31398112 |             |                |             |
| 8.841425204           | 8.827018321                                           | 6.004663604 |             |             |                |             |
| ENSG00000176619       | 11945.77347                                           | 11759.81559 | 12717.65865 |             |                |             |
| 6256.213741           | 5489.434202                                           | 5911.665377 | 12141.08257 |             |                |             |
| 5885.771107           | 1.044479994                                           | 1.15E-18    | 5.21E-16    |             |                | LMNB2       |
| 19                    | 2427638                                               | 2456996     | -           | 5432        | protein_coding | lamin       |
| B2 [Source:HGNC       | Symbol;Acc:HGNC:6638]                                 |             |             |             |                | -           |
| 6039                  | 4809                                                  | 6853        | 118.7013772 | 115.9114394 | 13167          | 13288       |
| 125.3038478           | 61.77564833                                           | 54.4179749  | 58.66134126 |             |                |             |
| ENSG00000138182       | 1866.215237                                           | 1161.998636 | 1413.589846 |             |                |             |
| 483.7972871           | 369.8433523                                           | 405.4403513 | 1480.60124  |             |                |             |
| 419.6936636           | 1.818614175                                           | 1.50E-18    | 6.62E-16    |             |                | KIF20B      |
| 10                    | 89701610                                              | 89774939    | +           | 6851        |                |             |
| protein_coding        | kinesin family member 20B [Source:HGNC                |             |             |             |                |             |
| Symbol;Acc:HGNC:7212] | -                                                     | 2057        | 1313        | 1216        | 467            | 324         |
| 470                   | 14.70310327                                           | 9.08107368  | 11.04298428 |             |                |             |
| 3.787694617           | 2.906955629                                           | 3.189884134 |             |             |                |             |
| ENSG00000188157       | 3824.970073                                           | 3635.560089 | 6355.34185  |             |                |             |
| 1424.45668            | 1569.551264                                           | 1171.463823 | 4605.290671 |             |                |             |
| 1388.490589           | 1.729888013                                           | 1.06E-17    | 4.59E-15    |             |                | AGRN        |
| 1                     | 1020123                                               | 1056118     | +           | 10758       | protein_coding | agrin       |
| [Source:HGNC          | Symbol;Acc:HGNC:329]                                  |             |             |             |                | -           |
| 1375                  | 1375                                                  | 1358        | 19.1910062  | 18.09361461 | 4216           | 4108        |
| 31.61727092           | 7.102041437                                           | 7.85630831  | 5.869474878 |             |                |             |
| ENSG00000147872       | 5794.61192                                            | 6414.44487  | 7910.755678 |             |                |             |
| 13809.46004           | 20228.37669                                           | 21515.08043 | 6706.604156 |             |                |             |
| 18517.63905           | -1.465424621                                          | 1.83E-17    | 7.72E-15    |             |                | PLIN2       |
| 9                     | 19108375                                              | 19149290    | -           | 5086        |                |             |
| protein_coding        | perilipin 2 [Source:HGNC Symbol;Acc:HGNC:248]         |             |             |             |                | -           |
| 6387                  | 7248                                                  | 6805        | 13330       | 17721       | 24941          | 61.49633641 |
| 67.52557168           | 83.24508868                                           | 145.6350258 | 214.1702926 |             |                |             |
| 228.0176811           |                                                       |             |             |             |                |             |

|                                    |                                                      |             |                |        |
|------------------------------------|------------------------------------------------------|-------------|----------------|--------|
| ENSG00000137801                    | 1335.473422                                          | 1552.281499 | 1489.151804    |        |
| 440.2866103                        | 142.6864785                                          | 218.2476785 | 1458.968908    |        |
| 267.0735891                        | 2.449131895                                          | 2.92E-17    | 1.20E-14       | THBS1  |
| 15                                 | 39581079                                             | 39599466    | + 9158         |        |
| protein_coding                     | thrombospondin 1 [Source:HGNC Symbol;Acc:HGNC:11785] |             |                |        |
| -                                  | 1472 1754                                            | 1281 425    | 125 253        |        |
| 7.871107691                        | 9.075182987                                          | 8.702726539 | 2.578697116    |        |
| 0.838989903                        | 1.284549665                                          |             |                |        |
| ENSG00000225630                    | 1668.434526                                          | 1700.075689 | 1072.979793    |        |
| 3630.033606                        | 4992.885256                                          | 4710.009187 | 1480.496669    |        |
| 4444.30935                         | -1.584936362                                         | 3.01E-17    | 1.21E-14       |        |
| MTND2P28                           | 1 629640                                             | 630683 +    | 1044           |        |
| unprocessed_pseudogene             | MT-ND2 pseudogene 28 [Source:HGNC                    |             |                |        |
| Symbol;Acc:HGNC:42129]             | -                                                    | 1839 1921   | 923 3504       | 4374   |
| 5460                               | 86.26009143                                          | 87.18731572 | 55.00574472    |        |
| 186.4986285                        | 257.5287028                                          | 243.1773728 |                |        |
| ENSG00000050165                    | 1424.384017                                          | 1182.353525 | 1608.888443    |        |
| 528.3439324                        | 353.8624667                                          | 425.2810493 | 1405.208662    |        |
| 435.8291495                        | 1.687883266                                          | 3.21E-17    | 1.26E-14       | DKK3   |
| 11                                 | 11963106                                             | 12009769    | - 5059         |        |
| protein_coding                     | dickkopf WNT signaling pathway inhibitor 3           |             |                |        |
| [Source:HGNC Symbol;Acc:HGNC:2893] | -                                                    |             | 1570 1336      | 1384   |
| 510                                | 310 493                                              | 15.19720272 | 12.5131952     |        |
| 17.02073293                        | 5.601670256                                          | 3.76655553  | 4.531200275    |        |
| ENSG00000138448                    | 1571.358673                                          | 1281.472982 | 2035.522879    |        |
| 512.804405                         | 481.7095515                                          | 574.5176042 | 1629.451511    |        |
| 523.0105202                        | 1.637894927                                          | 5.35E-17    | 2.06E-14       | ITGAV  |
| 2                                  | 186590065                                            | 186680901   | + 8211         |        |
| protein_coding                     | integrin subunit alpha V [Source:HGNC                |             |                |        |
| Symbol;Acc:HGNC:6150]              | -                                                    | 1732 1448   | 1751 495       | 422    |
| 666                                | 10.329529                                            | 8.356009991 | 13.26773964    |        |
| 3.349817835                        | 3.159102804                                          | 3.771457301 |                |        |
| ENSG00000198888                    | 19209.2247                                           | 21190.32395 | 13212.88009    |        |
| 38801.16401                        | 60247.93869                                          | 68006.14913 | 17870.80958    |        |
| 55685.08394                        | -1.639627615                                         | 9.72E-17    | 3.66E-14       | MT-ND1 |
| MT                                 | 3307 4262                                            | + 956       | protein_coding |        |
| mitochondrially encoded            | NADH:ubiquinone oxidoreductase core subunit 1        |             |                |        |
| [Source:HGNC Symbol;Acc:HGNC:7455] | -                                                    |             | 21173 23944    | 11366  |
| 37454                              | 52780 78835                                          | 1084.559015 | 1186.766428    |        |
| 739.7016817                        | 2176.969565                                          | 3393.585955 | 3834.353929    |        |
| ENSG00000117399                    | 3971.944729                                          | 3485.995908 | 4286.106713    |        |
| 1604.715199                        | 1614.069445                                          | 1058.458109 | 3914.68245     |        |
| 1425.747584                        | 1.457906658                                          | 1.22E-16    | 4.50E-14       | CDC20  |
| 1                                  | 43358955                                             | 43363203    | + 2038         |        |
| protein_coding                     | cell division cycle 20 [Source:HGNC                  |             |                |        |
| Symbol;Acc:HGNC:1723]              | -                                                    | 4378 3939   | 3687 1549      | 1414   |
| 1227                               | 105.1962506                                          | 91.58160322 | 112.557854     |        |
| 42.23371469                        | 42.64740299                                          | 27.9944153  |                |        |
| ENSG00000142945                    | 3306.02252                                           | 2378.866972 | 3225.914328    |        |
| 1234.874446                        | 799.0442797                                          | 722.0288809 | 2970.26794     |        |



|                        |                                              |             |                 |       |
|------------------------|----------------------------------------------|-------------|-----------------|-------|
| 918.6492022            | 1.693265725                                  | 1.71E-16    | 6.17E-14        | KIF2C |
| 1                      | 44739818                                     | 44767767    | + 3646          |       |
| protein_coding         | kinesin family member 2C [Source:HGNC        |             |                 |       |
| Symbol;Acc:HGNC:6393]  | -                                            | 3644 2688   | 2775 1192       | 700   |
| 837                    | 48.9429776                                   | 34.93325394 | 47.35361837     |       |
| 18.16651554            | 11.80126971                                  | 10.67431001 |                 |       |
| ENSG00000119403        | 1827.203445                                  | 1670.870849 | 1756.524883     |       |
| 772.8324972            | 517.0957982                                  | 518.4460662 | 1751.533059     |       |
| 602.7914539            | 1.539162425                                  | 2.50E-16    | 8.86E-14        | PHF19 |
| 9                      | 120855652                                    | 120894896   | - 6733          |       |
| protein_coding         | PHD finger protein 19 [Source:HGNC           |             |                 |       |
| Symbol;Acc:HGNC:24566] | -                                            | 2014 1888   | 1511 746        | 453   |
| 601                    | 14.64804061                                  | 13.28678221 | 13.96248426     |       |
| 6.156618693            | 4.135584965                                  | 4.150466145 |                 |       |
| ENSG00000075218        | 1250.191831                                  | 1131.908801 | 1490.314295     |       |
| 419.5672404            | 392.6731889                                  | 224.2861518 | 1290.804976     |       |
| 345.5088604            | 1.903696679                                  | 2.68E-16    | 9.30E-14        | GTSE1 |
| 22                     | 46296741                                     | 46330810    | + 4242          |       |
| protein_coding         | G2 and S-phase expressed 1 [Source:HGNC      |             |                 |       |
| Symbol;Acc:HGNC:13698] | -                                            | 1378 1279   | 1282 405        | 344   |
| 260                    | 15.90769432                                  | 14.28651565 | 18.80287278     |       |
| 5.305134545            | 4.984655384                                  | 2.849926777 |                 |       |
| ENSG00000110492        | 1738.292851                                  | 2146.113246 | 2393.570307     |       |
| 790.4439616            | 874.3827404                                  | 690.9738753 | 2092.658801     |       |
| 785.2668591            | 1.414605968                                  | 2.95E-16    | 1.00E-13        | MDK   |
| 11                     | 46380756                                     | 46383837    | + 2196          |       |
| protein_coding         | midkine [Source:HGNC Symbol;Acc:HGNC:6972]   |             |                 | -     |
| 1916                   | 2425 2059                                    | 763 766     | 801 42.72596226 |       |
| 52.32459168            | 58.33522234                                  | 19.30653096 | 21.44093864     |       |
| 16.96020895            |                                              |             |                 |       |
| ENSG00000121068        | 493.5445255                                  | 560.2019319 | 610.3081162     |       |
| 94.27313304            | 158.6673641                                  | 134.5716911 | 554.6848579     |       |
| 129.1707294            | 2.103078238                                  | 4.44E-16    | 1.48E-13        | TBX2  |
| 17                     | 61399896                                     | 61409466    | + 6029          |       |
| protein_coding         | T-box 2 [Source:HGNC Symbol;Acc:HGNC:11597]  |             |                 | T-box |
| 544                    | 633 525                                      | 91 139      | 156 4.418575696 |       |
| 4.97490586             | 5.417773769                                  | 0.838702914 | 1.417153444     |       |
| 1.20312384             |                                              |             |                 |       |
| ENSG00000134057        | 3276.083238                                  | 2509.846254 | 3384.013193     |       |
| 1383.017941            | 1071.860827                                  | 1099.864783 | 3056.647562     |       |
| 1184.914517            | 1.366971916                                  | 4.72E-16    | 1.54E-13        | CCNB1 |
| 5                      | 69167010                                     | 69178245    | + 2558          |       |
| protein_coding         | cyclin B1 [Source:HGNC Symbol;Acc:HGNC:1579] |             |                 | -     |
| 3611                   | 2836 2911                                    | 1335 939    | 1275 69.128261  |       |
| 52.53299086            | 70.80248683                                  | 28.99965086 | 22.56380887     |       |
| 23.17611637            |                                              |             |                 |       |
| ENSG00000197461        | 1300.090634                                  | 1388.557395 | 1879.748998     |       |
| 381.2364061            | 560.4724876                                  | 297.6104706 | 1522.799009     |       |
| 413.1064548            | 1.884147948                                  | 5.46E-16    | 1.75E-13        | PDGFA |
| 7                      | 497258 520296                                | - 4151      | protein_coding  |       |



|                                                                                            |                                                                                    |             |             |                |        |
|--------------------------------------------------------------------------------------------|------------------------------------------------------------------------------------|-------------|-------------|----------------|--------|
|                                                                                            | 1.871372622                                                                        | 2.262746213 | 0.149987366 | 0.16591666     |        |
|                                                                                            | 0.416160256                                                                        |             |             |                |        |
| ENSG00000106003                                                                            | 809.2678617                                                                        | 1081.464077 | 938.1307615 |                |        |
| 242.4166278                                                                                | 364.1358932                                                                        | 267.418104  | 942.9542334 |                |        |
| 291.3235417                                                                                | 1.696514257                                                                        | 7.73E-15    | 2.21E-12    |                | LFNG   |
| 7                                                                                          | 2512529                                                                            | 2529177 +   | 3418        | protein_coding | LFNG   |
| 0-fucosylpeptide 3-beta-N-acetylglucosaminyltransferase [Source:HGNC Symbol;Acc:HGNC:6560] | -                                                                                  | 892         | 1222        | 807            | 234    |
| 310                                                                                        | 12.77972415                                                                        | 16.94047519 | 14.68954429 |                | 319    |
| 3.804134317                                                                                | 5.7367508                                                                          | 4.217165584 |             |                |        |
| ENSG00000169679                                                                            | 1770.046635                                                                        | 1276.163011 | 1819.299432 |                |        |
| 636.0846559                                                                                | 450.8892721                                                                        | 333.8413105 | 1621.836359 |                |        |
| 473.6050795                                                                                | 1.776805015                                                                        | 1.03E-14    | 2.89E-12    |                | BUB1   |
| 2                                                                                          | 110637698                                                                          | 110678114   | -           | 6032           |        |
| protein_coding                                                                             | BUB1 mitotic checkpoint serine/threonine kinase [Source:HGNC Symbol;Acc:HGNC:1148] | -           | 1951        | 1442           | 1565   |
| 614                                                                                        | 395                                                                                | 387         | 15.83888553 | 11.32740343    |        |
| 16.14209339                                                                                | 5.656126083                                                                        | 4.025159766 | 2.983188185 |                |        |
| ENSG00000111665                                                                            | 659.5714523                                                                        | 469.0474312 | 498.7089178 |                |        |
| 153.3233372                                                                                | 141.5449867                                                                        | 148.3739158 | 542.4426004 |                |        |
| 147.7474132                                                                                | 1.876356778                                                                        | 1.16E-14    | 3.20E-12    |                | CDCA3  |
| 12                                                                                         | 6844793                                                                            | 6852066 -   | 5653        | protein_coding | cell   |
| division cycle associated 3 [Source:HGNC Symbol;Acc:HGNC:14624]                            | -                                                                                  |             |             |                |        |
| 727                                                                                        | 530                                                                                | 429         | 148         | 124            | 172    |
| 4.442457943                                                                                | 4.721556091                                                                        | 1.454771464 | 1.348310945 |                |        |
| 1.414752531                                                                                |                                                                                    |             |             |                |        |
| ENSG00000110031                                                                            | 755.7400547                                                                        | 678.7912824 | 640.5328991 |                |        |
| 1508.370129                                                                                | 1641.465249                                                                        | 1649.365855 | 691.6880787 |                |        |
| 1599.733744                                                                                | -1.208982003                                                                       | 1.22E-14    | 3.33E-12    |                | LPXN   |
| 11                                                                                         | 58526871                                                                           | 58578220    | -           | 2467           |        |
| protein_coding                                                                             | leupaxin [Source:HGNC Symbol;Acc:HGNC:14061]                                       | -           |             |                |        |
| 833                                                                                        | 767                                                                                | 551         | 1456        | 1438           | 1912   |
| 14.73169285                                                                                | 13.8959837                                                                         | 32.79474582 | 35.8291988  |                |        |
| 36.0370935                                                                                 |                                                                                    |             |             |                |        |
| ENSG00000164932                                                                            | 720.357267                                                                         | 744.2809238 | 933.4807949 |                |        |
| 299.394895                                                                                 | 235.1473166                                                                        | 233.7751813 | 799.3729952 |                |        |
| 256.1057976                                                                                | 1.641661574                                                                        | 1.67E-14    | 4.48E-12    |                | CTHRC1 |
| 8                                                                                          | 103371515                                                                          | 103382997   | +           | 1776           |        |
| protein_coding                                                                             | collagen triple helix repeat containing 1 [Source:HGNC Symbol;Acc:HGNC:18831]      | -           | 794         | 841            | 803    |
| 271                                                                                        | 21.89304776                                                                        | 22.4377588  | 28.13062818 |                | 206    |
| 9.042050432                                                                                | 7.129705958                                                                        | 7.095080831 |             |                |        |
| ENSG00000101447                                                                            | 1569.544171                                                                        | 1185.893505 | 1408.93988  |                |        |
| 463.0779172                                                                                | 391.5316971                                                                        | 190.643229  | 1388.125852 |                |        |
| 348.4176144                                                                                | 1.996731093                                                                        | 2.08E-14    | 5.49E-12    |                | FAM83D |
| 20                                                                                         | 38926312                                                                           | 38953106    | +           | 2475           |        |
| protein_coding                                                                             | family with sequence similarity 83 member D [Source:HGNC Symbol;Acc:HGNC:16122]    | -           | 1730        | 1340           | 1212   |
| 447                                                                                        | 343                                                                                | 221         | 34.2294234  | 25.65405585    |        |
| 30.46732064                                                                                | 10.03562359                                                                        | 8.518561771 | 4.151911508 |                |        |

|                 |                                                                                  |             |             |       |             |             |
|-----------------|----------------------------------------------------------------------------------|-------------|-------------|-------|-------------|-------------|
| ENSG00000140945 | 2644.636566                                                                      |             | 2400.99185  |       | 3618.836506 |             |
| 1261.809627     | 849.2699202                                                                      |             | 728.0673542 |       | 2888.154974 |             |
| 946.3823004     | 1.609754258                                                                      |             | 2.62E-14    |       | 6.80E-12    | CDH13       |
| 16              | 82626803                                                                         |             | 83800640    | +     | 11187       |             |
| protein_coding  | cadherin 13 [Source:HGNC Symbol;Acc:HGNC:1753]                                   |             |             |       |             | -           |
| 2915            | 2713                                                                             | 3113        | 1218        | 744   | 844         | 12.76008609 |
|                 | 11.49112626                                                                      | 17.31300001 | 6.049865142 |       | 4.087960188 |             |
|                 | 3.508001955                                                                      |             |             |       |             |             |
| ENSG00000161888 | 671.3657148                                                                      |             | 630.116549  |       | 763.757014  |             |
| 175.0786756     | 189.4876435                                                                      |             | 77.63751407 |       | 688.4130926 |             |
| 147.4012777     | 2.228880598                                                                      |             | 3.19E-14    |       | 8.17E-12    | SPC24       |
| 19              | 11131520                                                                         |             | 11155808    | -     | 2839        |             |
| protein_coding  | "SPC24, NDC80 kinetochore complex component [Source:HGNC Symbol;Acc:HGNC:26913]" |             |             |       |             | -           |
| 169             | 166                                                                              | 90          | 12.76424145 |       | 11.88340892 | 657         |
| 14.39815431     | 3.307755161                                                                      |             | 3.594099166 |       | 1.474036152 |             |
| ENSG00000140416 | 10641.14658                                                                      |             | 9646.447169 |       | 16528.30628 |             |
| 5151.871325     | 4439.26172                                                                       |             | 3225.40739  |       | 12271.96668 |             |
| 4272.180145     | 1.522375767                                                                      |             | 3.51E-14    |       | 8.87E-12    | TPM1        |
| 15              | 63042632                                                                         |             | 63071915    | +     | 12876       |             |
| protein_coding  | tropomyosin 1 [Source:HGNC Symbol;Acc:HGNC:12010]                                |             |             |       |             |             |
| -               | 11729                                                                            | 10900       | 14218       | 4973  | 3889        | 3739        |
| 44.60758398     | 40.11178333                                                                      |             | 68.70121037 |       | 21.46097926 |             |
| 18.56540105     | 13.50223043                                                                      |             |             |       |             |             |
| ENSG00000266074 | 790.2155914                                                                      |             | 889.4201289 |       | 1274.090848 |             |
| 346.0134773     | 280.8069897                                                                      |             | 290.7093583 |       | 984.5755228 |             |
| 305.8432751     | 1.685629445                                                                      |             | 4.02E-14    |       | 1.00E-11    | BAHCC1      |
| 17              | 81395475                                                                         |             | 81466332    | +     | 13473       |             |
| protein_coding  | BAH domain and coiled-coil containing 1 [Source:HGNC Symbol;Acc:HGNC:29279]      |             |             |       |             | -           |
| 337             | 3.165793104                                                                      |             | 3.534501683 |       | 5.061195241 |             |
| 1.377508225     | 1.122323761                                                                      |             | 1.163045243 |       |             |             |
| ENSG00000087245 | 19669.20094                                                                      |             | 17745.92281 |       | 26207.21176 |             |
| 10419.77112     | 9294.026465                                                                      |             | 8379.675686 |       | 21207.44517 |             |
| 9364.491091     | 1.179266728                                                                      |             | 4.98E-14    |       | 1.22E-11    | MMP2        |
| 16              | 55389700                                                                         |             | 55506691    | +     | 4933        |             |
| protein_coding  | matrix metalloproteinase 2 [Source:HGNC Symbol;Acc:HGNC:7166]                    |             |             |       |             | -           |
| 9714            | 215.2171351                                                                      |             | 21680       | 20052 | 22544       | 10058       |
| 113.2954737     | 101.4535721                                                                      |             | 192.6074233 |       | 284.3326331 | 8142        |
| 113.2954737     | 101.4535721                                                                      |             | 91.56257585 |       |             |             |
| ENSG00000089685 | 3275.175987                                                                      |             | 3254.127178 |       | 3786.235304 |             |
| 1541.52112      | 827.5815754                                                                      |             | 666.819982  |       | 3438.512823 |             |
| 1011.974226     | 1.764992359                                                                      |             | 5.47E-14    |       | 1.32E-11    | BIRC5       |
| 17              | 78214186                                                                         |             | 78225636    | +     | 3815        |             |
| protein_coding  | baculoviral IAP repeat containing 5 [Source:HGNC Symbol;Acc:HGNC:593]            |             |             |       |             | -           |
| 773             | 46.33843297                                                                      |             | 3610        | 3677  | 3257        | 1488        |
| 21.67306994     | 11.6812905                                                                       |             | 45.6694234  |       | 53.11657491 | 725         |
| 21.67306994     | 11.6812905                                                                       |             | 9.421411431 |       |             |             |
| ENSG00000198830 | 13985.27364                                                                      |             | 14740.47927 |       | 16773.59202 |             |
| 8059.83489      | 6424.316009                                                                      |             | 5108.548426 |       | 15166.44831 |             |

|                                    |                                                  |             |                                    |        |
|------------------------------------|--------------------------------------------------|-------------|------------------------------------|--------|
| 6530.899775                        | 1.21562334                                       | 5.59E-14    | 1.34E-11                           | HMGN2  |
| 1                                  | 26472450                                         | 26475972    | + 2509                             |        |
| protein_coding                     | high mobility group nucleosomal binding domain 2 |             |                                    |        |
| [Source:HGNC Symbol;Acc:HGNC:4986] | -                                                |             | 15415 16656                        | 14429  |
| 7780                               | 5628 5922                                        | 300.8649187 | 314.5549267                        |        |
| 357.8017157                        | 172.3022622                                      | 137.8798454 | 109.7485421                        |        |
| ENSG00000168003                    | 9129.666471                                      | 11372.18772 | 9004.66032                         |        |
| 18384.29691                        | 19782.05338                                      | 22803.86316 | 9835.504836                        |        |
| 20323.40448                        | -1.047024663                                     | 6.26E-14    | 1.48E-11                           | SLC3A2 |
| 11                                 | 62856102                                         | 62888875    | + 5178                             |        |
| protein_coding                     | solute carrier family 3 member 2                 |             | [Source:HGNC                       |        |
| Symbol;Acc:HGNC:11026]             | -                                                | 10063 12850 | 7746 17746                         | 17330  |
| 26435                              | 95.16869413                                      | 117.5892235 | 93.07269579                        |        |
| 190.4366244                        | 205.7234869                                      | 237.3822745 |                                    |        |
| ENSG00000115963                    | 2585.665253                                      | 2781.539766 | 2055.285237                        |        |
| 5194.346033                        | 5043.110897                                      | 5587.313096 | 2474.163419                        |        |
| 5274.923342                        | -1.091719828                                     | 6.56E-14    | 1.53E-11                           | RND3   |
| 2                                  | 150468195                                        | 150539011   | - 3594                             |        |
| protein_coding                     | Rho family GTPase 3                              |             | [Source:HGNC Symbol;Acc:HGNC:671]  |        |
| -                                  | 2850 3143                                        | 1768 5014   | 4418 6477                          |        |
| 38.83251072                        | 41.43742399                                      | 30.60631435 | 77.52080974                        |        |
| 75.5605306                         | 83.7966858                                       |             |                                    |        |
| ENSG00000134508                    | 692.232487                                       | 562.8569174 | 568.4584168                        |        |
| 138.8197783                        | 216.8834474                                      | 154.4123891 | 607.8492737                        |        |
| 170.0385383                        | 1.840906595                                      | 7.00E-14    | 1.60E-11                           |        |
| CABLES1 18                         | 23134564                                         | 23260467    | + 6654                             |        |
| protein_coding                     | Cdk5 and Abl enzyme substrate 1                  |             | [Source:HGNC                       |        |
| Symbol;Acc:HGNC:25097]             | -                                                | 763 636     | 489 134                            | 190    |
| 179                                | 5.615267176                                      | 4.528983724 | 4.572280959                        |        |
| 1.119010201                        | 1.755165867                                      | 1.250838536 |                                    |        |
| ENSG00000114554                    | 7554.678794                                      | 5830.348069 | 6577.377755                        |        |
| 3492.249796                        | 2522.69694                                       | 2370.532096 | 6654.134873                        |        |
| 2795.159611                        | 1.251457994                                      | 7.09E-14    | 1.60E-11                           | PLXNA1 |
| 3                                  | 126988594                                        | 127037392   | + 10944                            |        |
| protein_coding                     | plexin A1                                        |             | [Source:HGNC Symbol;Acc:HGNC:9099] | -      |
| 8327                               | 6588 5658                                        | 3371 2210   | 2748 37.25985529                   |        |
| 28.52357435                        | 32.16575172                                      | 17.11570182 | 12.41262256                        |        |
| 11.67539714                        |                                                  |             |                                    |        |
| ENSG00000162745                    | 811.0823636                                      | 525.687121  | 614.9580828                        |        |
| 200.977888                         | 146.110954                                       | 96.61557307 | 650.5758558                        |        |
| 147.9014717                        | 2.140368034                                      | 7.15E-14    | 1.60E-11                           |        |
| OLFML2B 1                          | 161983192                                        | 162023854   | - 3415                             |        |
| protein_coding                     | olfactomedin like 2B                             |             | [Source:HGNC                       |        |
| Symbol;Acc:HGNC:24558]             | -                                                | 894 594     | 529 194                            | 128    |
| 112                                | 12.81963011                                      | 8.241802017 | 9.63766465                         |        |
| 3.156625537                        | 2.303915899                                      | 1.524959581 |                                    |        |
| ENSG00000142949                    | 1841.719461                                      | 1608.036193 | 2135.497161                        |        |
| 823.5949534                        | 803.610247                                       | 653.0177573 | 1861.750938                        |        |
| 760.0743193                        | 1.292835771                                      | 7.35E-14    | 1.62E-11                           | PTPRF  |
| 1                                  | 43525187                                         | 43623666    | + 10712                            |        |

|                                                         |                                                                                    |             |           |             |             |
|---------------------------------------------------------|------------------------------------------------------------------------------------|-------------|-----------|-------------|-------------|
| protein_coding                                          | "protein tyrosine phosphatase, receptor type F [Source:HGNC Symbol;Acc:HGNC:9670]" | -           | 2030      | 1817        | 1837        |
|                                                         | 795                                                                                | 704         | 757       | 9.280132082 | 8.037311567 |
| 10.66953369                                             | 4.123904584                                                                        |             |           | 4.039703172 | 3.285915066 |
| ENSG00000143369                                         | 916.3234756                                                                        |             |           | 919.5099641 | 1250.841015 |
| 388.4881856                                             | 373.2678278                                                                        |             |           | 292.4346363 | 1028.891485 |
| 351.3968832                                             | 1.550559299                                                                        |             |           | 9.94E-14    | 2.17E-11    |
|                                                         | 1                                                                                  | 150508062   | 150513789 | +           | 3360        |
| protein_coding                                          | extracellular matrix protein 1 [Source:HGNC Symbol;Acc:HGNC:3153]                  | -           | 1010      | 1039        | 327         |
|                                                         | 339                                                                                | 14.72010066 |           | 14.65219571 | 19.92415174 |
| 6.20160404                                              | 5.982129846                                                                        |             |           | 4.69128091  |             |
| ENSG00000198899                                         | 37829.64353                                                                        |             |           | 35687.42955 | 25339.99298 |
| 63626.07705                                             | 81334.71723                                                                        |             |           | 81469.35671 | 32952.35535 |
| 75476.717                                               | -1.195604648                                                                       |             |           | 1.10E-13    | 2.38E-11    |
| ATP6                                                    | MT                                                                                 | 8527        | 9207      | +           | 681         |
| mitochondrially encoded ATP synthase membrane subunit 6 | [Source:HGNC Symbol;Acc:HGNC:7414]                                                 | -           | 41697     | 40325       | 71253       |
|                                                         | 94442                                                                              | 2998.37799  |           | 2805.78058  | 1991.481989 |
| 5011.336096                                             | 6431.368625                                                                        |             |           | 6448.357126 |             |
| ENSG00000080986                                         | 1374.485213                                                                        |             |           | 1049.604252 | 1425.214763 |
| 474.4735707                                             | 308.2027936                                                                        |             |           | 188.0553119 | 1283.101409 |
| 323.5772254                                             | 1.989124564                                                                        |             |           | 1.28E-13    | 2.73E-11    |
|                                                         | 18                                                                                 | 2571511     | 2616635   | +           | 3600        |
| protein_coding                                          | "NDC80, kinetochore complex component [Source:HGNC Symbol;Acc:HGNC:16909]"         | -           | 1515      | 1186        | 270         |
|                                                         | 218                                                                                | 20.60814093 |           | 15.61020581 | 21.1882367  |
| 7.069277352                                             | 4.610081716                                                                        |             |           | 2.815691119 |             |
| ENSG00000089597                                         | 8483.703783                                                                        |             |           | 8278.244662 | 11531.91717 |
| 4426.693379                                             | 4605.919527                                                                        |             |           | 3966.41433  | 9431.288537 |
| 4333.009079                                             | 1.122043858                                                                        |             |           | 1.42E-13    | 2.98E-11    |
|                                                         | 11                                                                                 | 62624826    | 62646726  | -           | 5030        |
| protein_coding                                          | glucosidase II alpha subunit [Source:HGNC Symbol;Acc:HGNC:4138]                    | -           | 9351      | 9354        | 4035        |
|                                                         | 4598                                                                               | 91.03717142 |           | 88.11621245 | 122.701687  |
| 47.20379889                                             | 49.3086275                                                                         |             |           | 42.50421503 |             |
| ENSG00000076382                                         | 2351.594504                                                                        |             |           | 1969.114216 | 2150.609552 |
| 1006.961377                                             | 609.5566362                                                                        |             |           | 527.0724567 | 2157.106091 |
| 714.5301567                                             | 1.594622255                                                                        |             |           | 1.43E-13    | 2.98E-11    |
|                                                         | 17                                                                                 | 28577565    | 28599279  | -           | 5472        |
| protein_coding                                          | sperm associated antigen 5 [Source:HGNC Symbol;Acc:HGNC:13452]                     | -           | 2592      | 2225        | 534         |
|                                                         | 611                                                                                | 23.19623992 |           | 19.26683453 | 21.0345142  |
| 9.870342431                                             | 5.99849814                                                                         |             |           | 5.191897856 |             |
| ENSG00000087086                                         | 37268.96243                                                                        |             |           | 49303.07998 | 38204.12558 |
| 76173.72746                                             | 93037.29146                                                                        |             |           | 110768.0292 | 41592.056   |
| 93326.34939                                             | -1.165969982                                                                       |             |           | 1.51E-13    | 3.11E-11    |
|                                                         | 19                                                                                 | 48965301    | 48966878  | +           | 878         |
| protein_coding                                          | ferritin light chain [Source:HGNC Symbol;Acc:HGNC:3999]                            | -           | 41079     | 55710       | 81505       |
|                                                         |                                                                                    |             |           | 32864       | 73529       |

|                        |                                   |              |             |        |
|------------------------|-----------------------------------|--------------|-------------|--------|
| 128406                 | 2291.152677                       | 3006.526827  | 2328.803004 |        |
| 4653.462166            | 5706.070012                       | 6800.202094  |             |        |
| ENSG00000117298        | 2615.604535                       | 2805.434635  | 3879.234636 |        |
| 1360.226634            | 1296.734717                       | 1019.639352  | 3100.091269 |        |
| 1225.533567            | 1.339041669                       | 1.56E-13     | 3.16E-11    | ECE1   |
| 1                      | 21217247                          | 21345572     | - 7333      |        |
| protein_coding         | endothelin converting enzyme 1    | [Source:HGNC |             |        |
| Symbol;Acc:HGNC:3146]  | -                                 | 2883 3170    | 3337 1313   | 1136   |
| 1182                   | 19.25269988                       | 20.48349301  | 28.31270528 |        |
| 9.949358612            | 9.52234707                        | 7.494916688  |             |        |
| ENSG00000148606        | 1399.888241                       | 1395.637356  | 1389.177522 |        |
| 2642.75563             | 2871.99344                        | 2711.274519  | 1394.90104  |        |
| 2742.007863            | -0.974943564                      | 1.58E-13     | 3.18E-11    | POLR3A |
| 10                     | 77969251                          | 78029545     | - 8917      |        |
| protein_coding         | RNA polymerase III subunit A      | [Source:HGNC |             |        |
| Symbol;Acc:HGNC:30074] | -                                 | 1543 1577    | 1195 2551   | 2516   |
| 3143                   | 8.473753825                       | 8.379910254  | 8.337886621 |        |
| 15.8965813             | 17.34359927                       | 16.38915764  |             |        |
| ENSG00000225614        | 639.611931                        | 551.3519804  | 1054.379926 |        |
| 128.4600934            | 206.6100209                       | 71.59904076  | 748.447946  |        |
| 135.556385             | 2.469925548                       | 1.75E-13     | 3.47E-11    | ZNF469 |
| 16                     | 88427471                          | 88440757     | + 13287     |        |
| protein_coding         | zinc finger protein 469           | [Source:HGNC |             |        |
| Symbol;Acc:HGNC:23216] | zf-C2H2                           | 705 623      | 907 124     | 181    |
| 83                     | 2.598309406                       | 2.221710934  | 4.247048286 |        |
| 0.51856929             | 0.837334528                       | 0.290457219  |             |        |
| ENSG00000128606        | 787.4938385                       | 698.2611758  | 778.8694054 |        |
| 266.2439032            | 123.2811174                       | 108.6925197  | 754.8748066 |        |
| 166.0725134            | 2.185808194                       | 1.78E-13     | 3.50E-11    | LRR17  |
| 7                      | 102912991                         | 102944949    | + 2674      |        |
| protein_coding         | leucine rich repeat containing 17 | [Source:HGNC |             |        |
| Symbol;Acc:HGNC:16895] | -                                 | 868 789      | 670 257     | 108    |
| 126                    | 15.89596895                       | 13.98112251  | 15.58907141 |        |
| 5.340522684            | 2.48261693                        | 2.190988814  |             |        |
| ENSG00000197632        | 117.9426256                       | 217.7088077  | 127.8740815 |        |
| 499.3368145            | 655.2163094                       | 945.4523936  | 154.5085049 |        |
| 700.0018392            | -2.177939428                      | 1.91E-13     | 3.71E-11    |        |
| SERPINB2               | 18 63871692                       | 63903890     | + 2748      |        |
| protein_coding         | serpin family B member 2          | [Source:HGNC |             |        |
| Symbol;Acc:HGNC:8584]  | -                                 | 130 246      | 110 482     | 574    |
| 1096                   | 2.316622699                       | 4.241747568  | 2.490478537 |        |
| 9.746357861            | 12.83933481                       | 18.54491486  |             |        |
| ENSG00000125844        | 3203.503161                       | 3191.292522  | 3510.724783 |        |
| 1787.045654            | 1303.583668                       | 1406.964283  | 3301.840155 |        |
| 1499.197868            | 1.138881113                       | 1.95E-13     | 3.75E-11    | RRBP1  |
| 20                     | 17613678                          | 17682295     | - 6980      |        |
| protein_coding         | ribosome binding protein 1        | [Source:HGNC |             |        |
| Symbol;Acc:HGNC:10448] | -                                 | 3531 3606    | 3020 1725   | 1142   |
| 1631                   | 24.77256511                       | 24.47917294  | 26.91896557 |        |
| 13.73237708            | 10.05675897                       | 10.86499564  |             |        |

|                        |                                                |              |                  |        |
|------------------------|------------------------------------------------|--------------|------------------|--------|
| ENSG00000134690        | 1623.979229                                    | 1515.111702  | 1784.424683      |        |
| 702.3866395            | 577.5948651                                    | 369.2095114  | 1641.171871      |        |
| 549.7303387            | 1.579328921                                    | 2.18E-13     | 4.14E-11         | CDCA8  |
| 1                      | 37692418                                       | 37709719     | + 2469           |        |
| protein_coding         | cell division cycle associated 8               | [Source:HGNC |                  |        |
| Symbol;Acc:HGNC:14629] | -                                              | 1790 1712    | 1535 678         | 506    |
| 428                    | 35.50263803                                    | 32.85557796  | 38.68068322      |        |
| 15.25880938            | 12.59728013                                    | 8.06034623   |                  |        |
| ENSG00000091986        | 1155.837731                                    | 971.7246781  | 1440.327154      |        |
| 423.7111144            | 450.8892721                                    | 288.1214411  | 1189.296521      |        |
| 387.5739426            | 1.619016693                                    | 2.36E-13     | 4.44E-11         | CCDC80 |
| 3                      | 112596794                                      | 112649530    | - 13071          |        |
| protein_coding         | coiled-coil domain containing 80               | [Source:HGNC |                  |        |
| Symbol;Acc:HGNC:30649] | -                                              | 1274 1098    | 1239 409         | 395    |
| 334                    | 4.772976509                                    | 3.980338124  | 5.897518859      |        |
| 1.738707538            | 1.857529164                                    | 1.188142881  |                  |        |
| ENSG00000142627        | 5523.343881                                    | 4472.765504  | 5479.985638      |        |
| 2500.827947            | 1499.920262                                    | 1186.991326  | 5158.698341      |        |
| 1729.246512            | 1.577145529                                    | 2.42E-13     | 4.50E-11         | EPHA2  |
| 1                      | 16124337                                       | 16156087     | - 4159           |        |
| protein_coding         | EPH receptor A2                                | [Source:HGNC |                  |        |
| -                      | 6088 5054                                      | 4714 2414    | 1314 1376        |        |
| 71.68270856            | 57.58014551                                    | 70.51922072  | 32.25227759      |        |
| 19.42020478            | 15.38369042                                    |              |                  |        |
| ENSG00000075702        | 1330.029916                                    | 1219.523321  | 1246.191049      |        |
| 578.0704202            | 404.0881072                                    | 514.132871   | 1265.248095      |        |
| 498.7637994            | 1.342068063                                    | 2.80E-13     | 5.16E-11         | WDR62  |
| 19                     | 36054881                                       | 36105106     | + 9812           |        |
| protein_coding         | WD repeat domain 62                            | [Source:HGNC |                  |        |
| Symbol;Acc:HGNC:24502] | -                                              | 1466 1378    | 1072 558         | 354    |
| 596                    | 7.31652927                                     | 6.65454121   | 6.797419803      |        |
| 3.160011791            | 2.217650398                                    | 2.824357959  |                  |        |
| ENSG00000101255        | 2326.191477                                    | 3347.936664  | 3003.878423      |        |
| 5483.381244            | 7327.236045                                    | 7423.871624  | 2892.668855      |        |
| 6744.829637            | -1.221461923                                   | 3.13E-13     | 5.71E-11         | TRIB3  |
| 20                     | 362835 397559                                  | + 3434       | protein_coding   |        |
| tribbles               | pseudokinase 3                                 | [Source:HGNC |                  |        |
| Symbol;Acc:HGNC:16228] | -                                              |              |                  |        |
| 2564                   | 3783 2584                                      | 5293 6419    | 8606 36.56338653 |        |
| 52.19903704            | 46.81651319                                    | 85.64729414  | 114.8985228      |        |
| 116.5284766            |                                                |              |                  |        |
| ENSG00000075426        | 2493.125655                                    | 2068.233673  | 2796.95491       |        |
| 1172.716336            | 1055.879941                                    | 1081.749363  | 2452.771412      |        |
| 1103.448547            | 1.151934049                                    | 3.21E-13     | 5.80E-11         | FOSL2  |
| 2                      | 28392448                                       | 28417312     | + 7157           |        |
| protein_coding         | "FOS like 2, AP-1 transcription factor subunit | [Source:HGNC |                  |        |
| Symbol;Acc:HGNC:3798]" | TF_bZIP                                        | 2748 2337    |                  | 2406   |
| 1132                   | 925 1254                                       | 18.80244793  | 15.47227358      |        |
| 20.91565417            | 8.788756928                                    | 7.944344628  | 8.146996644      |        |
| ENSG0000006062         | 950.7990123                                    | 830.1254536  | 854.4313627      |        |
| 369.8407527            | 317.3347282                                    | 343.33034    | 878.4519429      |        |



|                                      |                                                      |             |             |                |
|--------------------------------------|------------------------------------------------------|-------------|-------------|----------------|
| 343.5019403                          | 1.354353645                                          | 3.90E-13    | 6.98E-11    |                |
| MAP3K14 17                           | 45263119                                             | 45317145    | -           | 5784           |
| protein_coding                       | mitogen-activated protein kinase kinase kinase 14    |             |             |                |
| [Source:HGNC Symbol;Acc:HGNC:6853]   | -                                                    | 1048        | 938         | 735            |
| 357                                  | 278                                                  | 398         | 8.872820218 | 7.684241315    |
| 7.906165504                          | 3.429667164                                          | 2.95436311  | 3.199527195 |                |
| ENSG00000122566                      | 22669.47989                                          | 21951.41978 | 24623.89813 |                |
| 13728.65449                          | 10537.11107                                          | 10569.91622 | 23081.59926 |                |
| 11611.89393                          | 0.991129514                                          | 4.84E-13    | 8.56E-11    |                |
| HNRNPA2B1                            | 7                                                    | 26173057    | 26201529    | - 9267         |
| protein_coding                       | heterogeneous nuclear ribonucleoprotein A2/B1        |             |             |                |
| [Source:HGNC Symbol;Acc:HGNC:5033]   | -                                                    | 24987       | 24804       | 21182          |
| 13252                                | 9231                                                 | 12253       | 132.0394289 | 126.8262059    |
| 142.2114771                          | 79.46105152                                          | 61.22896921 | 61.48006084 |                |
| ENSG00000144057                      | 498.0807803                                          | 416.8327171 | 534.746159  |                |
| 103.5968495                          | 127.8470848                                          | 45.7198694  | 483.2198855 |                |
| 92.38793455                          | 2.394573883                                          | 5.05E-13    | 8.85E-11    |                |
| ST6GAL2 2                            | 106801600                                            | 106887108   | -           | 7708           |
| protein_coding                       | "ST6 beta-galactoside alpha-2,6-sialyltransferase 2  |             |             |                |
| [Source:HGNC Symbol;Acc:HGNC:10861]" | -                                                    | 549         | 471         | 460            |
| 100                                  | 112                                                  | 53          | 3.48786223  | 2.895380479    |
| 3.712983098                          | 0.720892219                                          | 0.893148508 | 0.319716597 |                |
| ENSG00000118515                      | 458.1617378                                          | 545.1570143 | 383.6222445 |                |
| 1027.680747                          | 1359.516767                                          | 1719.239617 | 462.3136655 |                |
| 1368.812377                          | -1.565041156                                         | 5.27E-13    | 9.13E-11    | SGK1           |
| 6                                    | 134169246                                            | 134318112   | -           | 9992           |
| protein_coding                       | serum/glucocorticoid regulated kinase 1 [Source:HGNC |             |             |                |
| Symbol;Acc:HGNC:10810]               | -                                                    | 505         | 616         | 330 992 1191   |
| 1993                                 | 2.474956877                                          | 2.921155847 | 2.054794342 |                |
| 5.5165974                            | 7.326671103                                          | 9.274401465 |             |                |
| ENSG00000164611                      | 1456.1378                                            | 1308.022836 | 1818.13694  |                |
| 675.4514587                          | 598.141718                                           | 478.7646701 | 1527.432526 |                |
| 584.1192823                          | 1.387178851                                          | 6.34E-13    | 1.09E-10    | PTTG1          |
| 5                                    | 160421822                                            | 160428744   | +           | 2013           |
| protein_coding                       | pituitary tumor-transforming 1 [Source:HGNC          |             |             |                |
| Symbol;Acc:HGNC:9690]                | -                                                    | 1605        | 1478        | 1564 652 524   |
| 555                                  | 39.04450717                                          | 34.79021399 | 48.33924027 |                |
| 17.9976526                           | 16.00054856                                          | 12.81976979 |             |                |
| ENSG00000091136                      | 4457.323996                                          | 3176.247605 | 4723.203574 |                |
| 1617.146821                          | 1519.325623                                          | 758.2597208 | 4118.925058 |                |
| 1298.244055                          | 1.666431895                                          | 7.11E-13    | 1.21E-10    | LAMB1          |
| 7                                    | 107923799                                            | 108003255   | -           | 8140           |
| protein_coding                       | laminin subunit beta 1 [Source:HGNC                  |             |             |                |
| Symbol;Acc:HGNC:6486]                | -                                                    | 4913        | 3589        | 4063 1561 1331 |
| 879                                  | 29.55636647                                          | 20.89178242 | 31.05483771 |                |
| 10.65590995                          | 10.05080879                                          | 5.021060893 |             |                |
| ENSG00000118193                      | 1566.822418                                          | 969.0696927 | 1183.4165   |                |
| 468.2577597                          | 186.063168                                           | 244.1268498 | 1239.769537 |                |
| 299.4825925                          | 2.049376009                                          | 7.39E-13    | 1.25E-10    | KIF14          |
| 1                                    | 200551497                                            | 200620734   | -           | 7277           |

|                        |                                               |             |      |             |       |        |      |
|------------------------|-----------------------------------------------|-------------|------|-------------|-------|--------|------|
| protein_coding         | kinesin family member 14 [Source:HGNC         |             |      |             |       |        |      |
| Symbol;Acc:HGNC:19181] | -                                             | 1727        | 1095 | 1018        | 452   | 163    |      |
| 283                    | 11.62167286                                   | 7.129977922 |      | 8.703666659 |       |        |      |
| 3.451422322            | 1.376837194                                   | 1.808277501 |      |             |       |        |      |
| ENSG00000095752        | 631.4466723                                   | 938.0948623 |      | 1676.312959 |       |        |      |
| 199.9419195            | 276.2410224                                   | 283.8082459 |      | 1081.951498 |       |        |      |
| 253.3303959            | 2.093142852                                   | 9.13E-13    |      | 1.52E-10    |       | IL11   |      |
| 19                     | 55364389                                      | 55370463    |      | -           | 2671  |        |      |
| protein_coding         | interleukin 11 [Source:HGNC                   |             |      |             |       |        |      |
| Symbol;Acc:HGNC:5966]  | -                                             | 696         | 1060 | 1442        | 193   | 242    | 329  |
| 12.76039256            | 18.80435399                                   | 33.58908853 |      | 4.015091664 |       |        |      |
| 5.56914901             | 5.727340825                                   |             |      |             |       |        |      |
| ENSG00000101160        | 2908.646597                                   | 3692.199779 |      | 3098.040247 |       |        |      |
| 1715.563828            | 1288.744274                                   | 1313.799266 |      | 3232.962208 |       |        |      |
| 1439.369123            | 1.167599656                                   | 9.37E-13    |      | 1.55E-10    |       | CTSZ   |      |
| 20                     | 58995185                                      | 59007247    |      | -           | 2038  |        |      |
| protein_coding         | cathepsin Z [Source:HGNC                      |             |      |             |       |        |      |
| Symbol;Acc:HGNC:2547]  | -                                             | 3206        | 4172 | 2665        | 1656  | 1129   | 1523 |
| 96.99884453            | 81.35792814                                   | 45.15108556 |      | 34.05156858 |       |        |      |
| 34.74775429            |                                               |             |      |             |       |        |      |
| ENSG00000162723        | 101.6121082                                   | 88.49951531 |      | 86.02438209 |       |        |      |
| 275.5676196            | 496.5489453                                   | 444.2591083 |      | 92.0453352  |       |        |      |
| 405.4585577            | -2.137828322                                  | 1.07E-12    |      | 1.75E-10    |       | SLAMF9 |      |
| 1                      | 159951492                                     | 159954254   |      | -           | 1156  |        |      |
| protein_coding         | SLAM family member 9 [Source:HGNC             |             |      |             |       |        |      |
| Symbol;Acc:HGNC:18430] | -                                             | 112         | 100  | 74          | 266   | 435    |      |
| 515                    | 4.744482752                                   | 4.098912116 |      | 3.982728779 |       |        |      |
| 12.78603374            | 23.13016778                                   | 20.71478419 |      |             |       |        |      |
| ENSG00000145934        | 722.1717689                                   | 469.9324263 |      | 789.3318303 |       |        |      |
| 202.0138565            | 69.63100152                                   | 76.77487503 |      | 660.4786752 |       |        |      |
| 116.139911             | 2.507962199                                   | 1.10E-12    |      | 1.79E-10    |       | TENM2  |      |
| 5                      | 167284799                                     | 168264157   |      | +           | 11042 |        |      |
| protein_coding         | teneurin transmembrane protein 2 [Source:HGNC |             |      |             |       |        |      |
| Symbol;Acc:HGNC:29943] | -                                             | 796         | 531  | 679         | 195   | 61     |      |
| 89                     | 3.530156901                                   | 2.278626895 |      | 3.825858276 |       |        |      |
| 0.981293478            | 0.339570108                                   | 0.374777303 |      |             |       |        |      |
| ENSG00000137807        | 2520.343183                                   | 1507.146746 |      | 2155.259519 |       |        |      |
| 867.1056302            | 563.8969631                                   | 409.7535465 |      | 2060.916483 |       |        |      |
| 613.58538              | 1.748724694                                   | 1.39E-12    |      | 2.23E-10    |       | KIF23  |      |
| 15                     | 69414246                                      | 69448427    |      | +           | 6576  |        |      |
| protein_coding         | kinesin family member 23 [Source:HGNC         |             |      |             |       |        |      |
| Symbol;Acc:HGNC:6392]  | -                                             | 2778        | 1703 | 1854        | 837   | 494    |      |
| 475                    | 20.6870765                                    | 12.27098102 |      | 17.5410171  |       |        |      |
| 7.072544637            | 4.617559546                                   | 3.358635107 |      |             |       |        |      |
| ENSG00000183087        | 2603.810272                                   | 2969.158739 |      | 3258.464095 |       |        |      |
| 1430.672491            | 1496.495787                                   | 1165.42535  |      | 2943.811035 |       |        |      |
| 1364.197876            | 1.110080056                                   | 1.41E-12    |      | 2.24E-10    |       | GAS6   |      |
| 13                     | 113820549                                     | 113864067   |      | -           | 6006  |        |      |
| protein_coding         | growth arrest specific 6 [Source:HGNC         |             |      |             |       |        |      |
| Symbol;Acc:HGNC:4168]  | -                                             | 2870        | 3355 | 2803        | 1381  | 1311   |      |

|                                    |                                                 |             |                |        |
|------------------------------------|-------------------------------------------------|-------------|----------------|--------|
| 1351                               | 23.40050621                                     | 26.46876252 | 29.03652342    |        |
| 12.77674992                        | 13.41728745                                     | 10.45926193 |                |        |
| ENSG0000029993                     | 2346.150998                                     | 2042.568813 | 2430.77004     |        |
| 1155.104872                        | 1079.851269                                     | 1111.07909  | 2273.163284    |        |
| 1115.345077                        | 1.026854389                                     | 1.47E-12    | 2.32E-10       | HMGB3  |
| X                                  | 150980509                                       | 150990775   | + 3967         |        |
| protein_coding                     | high mobility group box 3 [Source:HGNC          |             |                |        |
| Symbol;Acc:HGNC:5004]              | HMG                                             | 2586 2308   | 2091 1115      | 946    |
| 1288                               | 31.92236093                                     | 27.56766895 | 32.79432369    |        |
| 15.61797454                        | 14.65805329                                     | 15.09679232 |                |        |
| ENSG00000162413                    | 3950.170706                                     | 5334.750783 | 4334.931362    |        |
| 7985.245159                        | 12273.32014                                     | 15334.27167 | 4539.95095     |        |
| 11864.27899                        | -1.385886178                                    | 1.73E-12    | 2.69E-10       | KLHL21 |
| 1                                  | 6590724 6614607 -                               | 6901        | protein_coding | kelch  |
| like family member 21 [Source:HGNC | Symbol;Acc:HGNC:29041]                          |             |                | -      |
| 4354                               | 6028 3729 7708                                  | 10752 17776 | 30.89620093    |        |
| 41.38925956                        | 33.61918667                                     | 62.0642801  | 95.7689197     |        |
| 119.7713742                        |                                                 |             |                |        |
| ENSG00000135451                    | 571.5681086                                     | 446.9225523 | 491.7339679    |        |
| 149.1794633                        | 173.5067579                                     | 150.0991939 | 503.4082096    |        |
| 157.5951383                        | 1.676927244                                     | 1.74E-12    | 2.69E-10       | TROAP  |
| 12                                 | 49323236                                        | 49331731    | + 3954         |        |
| protein_coding                     | trophinin associated protein [Source:HGNC       |             |                |        |
| Symbol;Acc:HGNC:12327]             | -                                               | 630 505     | 423 144        | 152    |
| 174                                | 7.802478274                                     | 6.05175244  | 6.655957635    |        |
| 2.023661507                        | 2.362948646                                     | 2.046178898 |                |        |
| ENSG00000173545                    | 1005.23407                                      | 1063.764174 | 877.6811957    |        |
| 1823.304551                        | 2438.226545                                     | 2740.604247 | 982.22648      |        |
| 2334.045114                        | -1.248324146                                    | 1.96E-12    | 3.02E-10       | ZNF622 |
| 5                                  | 16451519                                        | 16465792    | - 1699         |        |
| protein_coding                     | zinc finger protein 622 [Source:HGNC            |             |                |        |
| Symbol;Acc:HGNC:30958]             | -                                               | 1108 1202   | 755 1760       | 2136   |
| 3177                               | 31.9355989                                      | 33.52258724 | 27.64778983    |        |
| 57.56139793                        | 77.27788539                                     | 86.94705051 |                |        |
| ENSG00000283632                    | 78.02358307                                     | 127.439302  | 211.5734803    |        |
| 9.323716454                        | 9.131934625                                     | 8.626390453 | 139.0121218    |        |
| 9.027347177                        | 3.94385693                                      | 2.21E-12    | 3.36E-10       |        |
| EXOC3L2 19                         | 45212621                                        | 45245431    | - 2964         |        |
| protein_coding                     | exocyst complex component 3 like 2 [Source:HGNC |             |                |        |
| Symbol;Acc:HGNC:30162]             | -                                               | 86 144      | 182 9          | 8      |
| 10                                 | 1.420852303                                     | 2.302028699 | 3.820322579    |        |
| 0.168723802                        | 0.165904875                                     | 0.156874668 |                |        |
| ENSG00000179046                    | 242.2360079                                     | 281.4284587 | 173.2112558    |        |
| 690.9909861                        | 651.7918339                                     | 860.0511281 | 232.2919075    |        |
| 734.2779827                        | -1.657685388                                    | 2.65E-12    | 4.01E-10       | TRIML2 |
| 4                                  | 188091273                                       | 188109603   | - 3050         |        |
| protein_coding                     | tripartite motif family like 2 [Source:HGNC     |             |                |        |
| Symbol;Acc:HGNC:26378]             | -                                               | 267 318     | 149 667        | 571    |
| 997                                | 4.286867946                                     | 4.940304541 | 3.039437908    |        |
| 12.15172795                        | 11.5075701                                      | 15.19939624 |                |        |

|                        |                                                   |             |             |       |  |
|------------------------|---------------------------------------------------|-------------|-------------|-------|--|
| ENSG00000168487        | 1036.987854                                       | 1037.214319 | 1608.888443 |       |  |
| 354.3012253            | 479.4265678                                       | 444.2591083 | 1227.696872 |       |  |
| 425.9956338            | 1.526259727                                       | 2.74E-12    | 4.11E-10    | BMP1  |  |
| 8                      | 22164736                                          | 22212326    | + 7471      |       |  |
| protein_coding         | bone morphogenetic protein 1 [Source:HGNC         |             |             |       |  |
| Symbol;Acc:HGNC:1067]  | -                                                 | 1143 1172   | 1384 342    | 420   |  |
| 515                    | 7.491972551                                       | 7.433191406 | 11.52561744 |       |  |
| 2.543662066            | 3.455555831                                       | 3.205232301 |             |       |  |
| ENSG00000122952        | 1995.044874                                       | 1771.760297 | 2077.372578 |       |  |
| 998.6736291            | 674.6216705                                       | 610.7484441 | 1948.05925  |       |  |
| 761.3479145            | 1.355751051                                       | 3.05E-12    | 4.54E-10    | ZWINT |  |
| 10                     | 56357228                                          | 56361275    | - 2378      |       |  |
| protein_coding         | ZW10 interacting kinetochore protein [Source:HGNC |             |             |       |  |
| Symbol;Acc:HGNC:13195] | -                                                 | 2199 2002   | 1787 964    | 591   |  |
| 708                    | 45.28371648                                       | 39.89134355 | 46.75408358 |       |  |
| 22.52564458            | 15.27646927                                       | 13.84370785 |             |       |  |
| ENSG00000170312        | 2329.820481                                       | 1890.349647 | 2251.746326 |       |  |
| 1011.105251            | 518.23729                                         | 445.9843864 | 2157.305485 |       |  |
| 658.4423091            | 1.71258991                                        | 3.18E-12    | 4.69E-10    | CDK1  |  |
| 10                     | 60778331                                          | 60794852    | + 3931      |       |  |
| protein_coding         | cyclin dependent kinase 1 [Source:HGNC            |             |             |       |  |
| Symbol;Acc:HGNC:1722]  | -                                                 | 2568 2136   | 1937 976    | 454   |  |
| 517                    | 31.99047283                                       | 25.74688216 | 30.6572661  |       |  |
| 13.7961789             | 7.099048925                                       | 6.115310564 |             |       |  |
| ENSG00000185950        | 942.6337537                                       | 1081.464077 | 992.767869  |       |  |
| 2211.792737            | 1850.358253                                       | 2325.674866 | 1005.6219   |       |  |
| 2129.275285            | -1.082533082                                      | 3.29E-12    | 4.81E-10    | IRS2  |  |
| 13                     | 109752698                                         | 109786568   | - 8138      |       |  |
| protein_coding         | insulin receptor substrate 2 [Source:HGNC         |             |             |       |  |
| Symbol;Acc:HGNC:6126]  | -                                                 | 1039 1222   | 854 2135    | 1621  |  |
| 2696                   | 6.252109067                                       | 7.115082845 | 6.52900546  |       |  |
| 14.57780839            | 12.24370027                                       | 15.40398973 |             |       |  |
| ENSG00000198826        | 2067.624951                                       | 1611.576174 | 1877.424015 |       |  |
| 879.5372522            | 555.9065203                                       | 439.083274  | 1852.20838  |       |  |
| 624.8423488            | 1.568470123                                       | 3.46E-12    | 5.02E-10    |       |  |
| ARHGAP11A              | 15 32615144                                       | 32639949    | + 6428      |       |  |
| protein_coding         | Rho GTPase activating protein 11A [Source:HGNC    |             |             |       |  |
| Symbol;Acc:HGNC:15783] | -                                                 | 2279 1821   | 1615 849    | 487   |  |
| 509                    | 17.36189561                                       | 13.42333777 | 15.63160259 |       |  |
| 7.339117922            | 4.656937971                                       | 3.681907998 |             |       |  |
| ENSG00000196878        | 1537.790387                                       | 1333.687696 | 1902.998831 |       |  |
| 707.566482             | 587.8682915                                       | 416.6546589 | 1591.492305 |       |  |
| 570.6964775            | 1.480354854                                       | 3.68E-12    | 5.30E-10    | LAMB3 |  |
| 1                      | 209614870                                         | 209652466   | - 4688      |       |  |
| protein_coding         | laminin subunit beta 3 [Source:HGNC               |             |             |       |  |
| Symbol;Acc:HGNC:6490]  | -                                                 | 1695 1507   | 1637 683    | 515   |  |
| 483                    | 17.70560549                                       | 15.23183022 | 21.72540709 |       |  |
| 8.095527349            | 6.752537213                                       | 4.790607012 |             |       |  |
| ENSG00000173546        | 1189.406016                                       | 1024.824387 | 1621.675852 |       |  |
| 383.3083431            | 495.4074534                                       | 510.6823148 | 1278.635418 |       |  |

|                        |                                                       |             |                  |       |
|------------------------|-------------------------------------------------------|-------------|------------------|-------|
| 463.1327038            | 1.463897036                                           | 4.00E-12    | 5.70E-10         | CSPG4 |
| 15                     | 75674322                                              | 75712848    | - 8290           |       |
| protein_coding         | chondroitin sulfate proteoglycan 4 [Source:HGNC       |             |                  |       |
| Symbol;Acc:HGNC:2466]  | -                                                     | 1311 1158   | 1395 370         | 434   |
| 592                    | 7.744205069                                           | 6.618818463 | 10.46951404      |       |
| 2.48004315             | 3.21797421                                            | 3.320459552 |                  |       |
| ENSG00000117519        | 4570.730367                                           | 4346.211197 | 5275.387107      |       |
| 2687.302276            | 1957.658485                                           | 2010.811615 | 4730.776224      |       |
| 2218.590792            | 1.092302641                                           | 4.66E-12    | 6.59E-10         | CNN3  |
| 1                      | 94896949                                              | 94927278    | - 2838           |       |
| protein_coding         | calponin 3 [Source:HGNC Symbol;Acc:HGNC:2157]         |             |                  | -     |
| 5038                   | 4911 4538                                             | 2594 1715   | 2331 86.93095598 |       |
| 81.99436065            | 99.48530759                                           | 50.78899559 | 37.14489144      |       |
| 38.1909886             |                                                       |             |                  |       |
| ENSG00000103187        | 5004.396328                                           | 5114.38699  | 6577.377755      |       |
| 2815.762369            | 2794.371995                                           | 2828.593429 | 5565.387024      |       |
| 2812.909265            | 0.984113566                                           | 5.08E-12    | 7.14E-10         | COTL1 |
| 16                     | 84565594                                              | 84618077    | - 6762           |       |
| protein_coding         | coactosin like F-actin binding protein 1 [Source:HGNC |             |                  |       |
| Symbol;Acc:HGNC:18304] | -                                                     | 5516 5779   | 5658 2718        | 2448  |
| 3279                   | 39.94641179                                           | 40.49523922 | 52.05885637      |       |
| 22.33501917            | 22.25274582                                           | 22.54744148 |                  |       |
| ENSG00000177508        | 2548.467963                                           | 2983.318661 | 4322.143954      |       |
| 1389.233752            | 1296.734717                                           | 1394.024697 | 3284.643526      |       |
| 1359.997722            | 1.271505831                                           | 6.19E-12    | 8.61E-10         | IRX3  |
| 16                     | 54283304                                              | 54286763    | - 2911           |       |
| protein_coding         | iroquois homeobox 3 [Source:HGNC                      |             |                  |       |
| Symbol;Acc:HGNC:14360] | Homeobox                                              | 2809        | 3371 3718 1341   |       |
| 1136                   | 1616 47.25396087                                      | 54.87101425 | 79.46465946      |       |
| 25.59756274            | 23.98741706                                           | 25.81250595 |                  |       |
| ENSG00000136205        | 4375.671409                                           | 3695.739759 | 4932.45207       |       |
| 2373.403822            | 1916.56478                                            | 1758.921013 | 4334.62108       |       |
| 2016.296538            | 1.104183359                                           | 7.56E-12    | 1.04E-09         | TNS3  |
| 7                      | 47275154                                              | 47582558    | - 11797          |       |
| protein_coding         | tensin 3 [Source:HGNC Symbol;Acc:HGNC:21616]          |             |                  | -     |
| 4823                   | 4176 4243                                             | 2291 1679   | 2039 20.02047449 |       |
| 16.77317783            | 22.37733167                                           | 10.79109593 | 8.74835659       |       |
| 8.036679784            |                                                       |             |                  |       |
| ENSG00000166401        | 1289.203623                                           | 1088.544038 | 1224.103707      |       |
| 2278.09472             | 2332.067805                                           | 2506.829066 | 1200.617123      |       |
| 2372.33053             | -0.982876484                                          | 8.43E-12    | 1.16E-09         |       |
| SERPINB8               | 18 63969925                                           | 64019779    | + 5868           |       |
| protein_coding         | serpin family B member 8 [Source:HGNC                 |             |                  |       |
| Symbol;Acc:HGNC:8952]  | -                                                     | 1421 1230   | 1053 2199        | 2043  |
| 2906                   | 11.85857914                                           | 9.932108314 | 11.16464999      |       |
| 20.82318549            | 21.40058384                                           | 23.02695557 |                  |       |
| ENSG00000105894        | 632.3539233                                           | 569.9368786 | 869.5437541      |       |
| 243.4525963            | 93.60232991                                           | 94.89029498 | 690.6115187      |       |
| 143.9817404            | 2.262297514                                           | 1.04E-11    | 1.41E-09         | PTN   |
| 7                      | 137227341                                             | 137343865   | - 1713           |       |

|                 |                                                       |                                     |             |             |             |       |                |
|-----------------|-------------------------------------------------------|-------------------------------------|-------------|-------------|-------------|-------|----------------|
| protein_coding  | pleiotrophin                                          | [Source:HGNC Symbol;Acc:HGNC:9630]  | -           |             |             |       |                |
|                 | 697                                                   | 644                                 | 748         | 235         | 82          | 110   | 19.92526466    |
|                 | 17.81373327                                           |                                     | 27.16758794 |             | 7.622940728 |       | 2.942414483    |
|                 | 2.985838684                                           |                                     |             |             |             |       |                |
| ENSG00000087303 | 271.2680388                                           |                                     | 226.5587592 |             | 327.8226453 |       |                |
| 55.94229872     | 61.64055872                                           |                                     | 66.42320649 |             | 275.2164811 |       |                |
| 61.33535464     | 2.16302673                                            |                                     | 1.44E-11    |             | 1.94E-09    |       | NID2           |
|                 | 14                                                    | 52004803                            | 52069228    |             | -           | 6392  |                |
| protein_coding  | nidogen 2                                             | [Source:HGNC Symbol;Acc:HGNC:13389] | -           |             |             |       |                |
|                 | 299                                                   | 256                                 | 282         | 54          | 54          | 77    | 2.290673046    |
|                 | 1.897709099                                           |                                     | 2.744853618 |             | 0.469428051 |       | 0.519283297    |
|                 | 0.560125026                                           |                                     |             |             |             |       |                |
| ENSG00000150995 | 2466.815376                                           |                                     | 2564.715954 |             | 2135.497161 |       |                |
| 5799.351634     | 4395.88503                                            |                                     | 4423.613024 |             | 2389.009497 |       |                |
| 4872.949896     | -1.028008308                                          |                                     | 1.69E-11    |             | 2.27E-09    |       | ITPR1          |
|                 | 3                                                     | 4493345                             | 4847840     | +           | 32454       |       |                |
| protein_coding  | "inositol 1,4,5-trisphosphate receptor type 1         | [Source:HGNC Symbol;Acc:HGNC:6180]" | -           |             |             |       |                |
|                 | 5598                                                  | 3851                                | 5128        | 4.102699036 | 4.231132154 |       | 1837           |
| 3.52166281      | 9.584659875                                           |                                     | 7.293779787 |             | 7.347012907 |       |                |
| ENSG00000184226 | 347.47712                                             |                                     | 326.5632115 |             | 202.2735471 |       |                |
| 697.2067971     | 997.6638578                                           |                                     | 1086.062558 |             | 292.1046262 |       |                |
| 926.9777376     | -1.663386101                                          |                                     | 1.70E-11    |             | 2.27E-09    |       | PCDH9          |
|                 | 13                                                    | 66302834                            | 67230445    |             | -           | 30944 |                |
| protein_coding  | protocadherin 9                                       | [Source:HGNC Symbol;Acc:HGNC:8661]  | -           |             |             |       |                |
|                 | -                                                     | 383                                 | 369         | 174         | 673         | 874   | 1259           |
| 0.60610938      | 0.565036307                                           |                                     | 0.349848199 |             | 1.208511133 |       |                |
| 1.736130395     | 1.891822106                                           |                                     |             |             |             |       |                |
| ENSG00000198886 | 47129.87318                                           |                                     | 44775.44478 |             | 32982.21309 |       |                |
| 73681.18726     | 88302.38335                                           |                                     | 89103.71226 |             | 41629.17702 |       |                |
| 83695.76096     | -1.007522657                                          |                                     | 1.89E-11    |             | 2.49E-09    |       | MT-ND4         |
|                 | MT                                                    | 10760                               | 12137       | +           | 1378        |       | protein_coding |
| mitochondrially | encoded NADH:ubiquinone oxidoreductase core subunit 4 | [Source:HGNC Symbol;Acc:HGNC:7459]  | -           |             |             |       |                |
|                 | 71123                                                 | 77357                               | 103292      | 1846.070566 | 1739.707516 |       | 28372          |
| 1280.995429     | 2867.958701                                           |                                     | 3450.624977 |             | 3485.366777 |       |                |
| ENSG00000166147 | 2976.690419                                           |                                     | 1924.864458 |             | 3795.535237 |       |                |
| 1158.212777     | 1120.944975                                           |                                     | 741.0069399 |             | 2899.030038 |       |                |
| 1006.721564     | 1.52625259                                            |                                     | 1.90E-11    |             | 2.49E-09    |       | FBN1           |
|                 | 15                                                    | 48408306                            | 48645849    |             | -           | 16057 |                |
| protein_coding  | fibrillin 1                                           | [Source:HGNC Symbol;Acc:HGNC:3603]  | -           |             |             |       |                |
|                 | 3281                                                  | 2175                                | 3265        | 1118        | 982         | 859   | 10.00623058    |
|                 | 6.418318946                                           |                                     | 12.6510224  |             | 3.86891724  |       | 3.759191419    |
|                 | 2.487481014                                           |                                     |             |             |             |       |                |
| ENSG00000169607 | 899.0857073                                           |                                     | 775.2557541 |             | 1068.329826 |       |                |
| 390.5601226     | 267.1090878                                           |                                     | 197.5443414 |             | 914.2237626 |       |                |
| 285.0711839     | 1.682383981                                           |                                     | 1.94E-11    |             | 2.52E-09    |       | CKAP2L         |
|                 | 2                                                     | 112736607                           | 112764677   |             | -           | 5219  |                |
| protein_coding  | cytoskeleton associated protein 2 like                | [Source:HGNC Symbol;Acc:HGNC:26877] | -           |             |             |       |                |
|                 | -                                                     |                                     | 991         | 876         | 919         | 377   | 234            |

|                                     |                                                        |             |                  |        |
|-------------------------------------|--------------------------------------------------------|-------------|------------------|--------|
| 229                                 | 9.298545942                                            | 7.953224655 | 10.95557209      |        |
| 4.013895827                         | 2.755979106                                            | 2.040230349 |                  |        |
| ENSG00000119630                     | 1709.26082                                             | 1587.681305 | 2656.29342       |        |
| 756.2570013                         | 641.5184074                                            | 311.4126953 | 1984.411848      |        |
| 569.729368                          | 1.801411402                                            | 2.09E-11    | 2.70E-09         | PGF    |
| 14                                  | 74941834                                               | 74955784    | - 5962           |        |
| protein_coding                      | placental growth factor [Source:HGNC                   |             |                  |        |
| Symbol;Acc:HGNC:8893]               | -                                                      | 1884 1794   | 2285 730         | 562    |
| 361                                 | 15.4745351                                             | 14.25794411 | 23.84520604      |        |
| 6.803665164                         | 5.794176282                                            | 2.815439817 |                  |        |
| ENSG00000122642                     | 2605.624774                                            | 2533.741123 | 3225.914328      |        |
| 1455.535735                         | 1286.46129                                             | 996.3480973 | 2788.426742      |        |
| 1246.115041                         | 1.16234913                                             | 2.35E-11    | 3.02E-09         | FKBP9  |
| 7                                   | 32957404                                               | 33006931    | + 5170           |        |
| protein_coding                      | FK506 binding protein 9 [Source:HGNC                   |             |                  |        |
| Symbol;Acc:HGNC:3725]               | -                                                      | 2872 2863   | 2775 1405        | 1127   |
| 1155                                | 27.2033617                                             | 26.23960214 | 33.39483415      |        |
| 15.10072591                         | 13.3992575                                             | 10.38777321 |                  |        |
| ENSG00000164442                     | 1328.215414                                            | 1719.545583 | 1487.989312      |        |
| 3040.567533                         | 2955.322343                                            | 4477.959284 | 1511.91677       |        |
| 3491.283053                         | -1.207666257                                           | 2.71E-11    | 3.44E-09         | CITED2 |
| 6                                   | 139371807                                              | 139374620   | - 2535           |        |
| protein_coding                      | Cbp/p300 interacting transactivator with Glu/Asp rich  |             |                  |        |
| carboxy-terminal                    | domain 2 [Source:HGNC Symbol;Acc:HGNC:1987]            |             |                  | -      |
| 1464                                | 1943 1280                                              | 2935 2589   | 5191 28.28080691 |        |
| 36.31794593                         | 31.41512938                                            | 64.33424158 | 62.77712854      |        |
| 95.21471753                         |                                                        |             |                  |        |
| ENSG00000112742                     | 1360.876449                                            | 887.6501386 | 1217.128757      |        |
| 476.5455077                         | 307.0613018                                            | 194.0937852 | 1155.218448      |        |
| 325.9001982                         | 1.827231912                                            | 3.02E-11    | 3.81E-09         | TTK    |
| 6                                   | 80003887                                               | 80042527    | + 4579           |        |
| protein_coding                      | TTK protein kinase [Source:HGNC Symbol;Acc:HGNC:12401] |             |                  |        |
| -                                   | 1500 1003                                              | 1047 460    | 269 225          |        |
| 16.0416597                          | 10.37902912                                            | 14.22600263 | 5.582120815      |        |
| 3.611012541                         | 2.284772131                                            |             |                  |        |
| ENSG00000162511                     | 3925.67493                                             | 3085.978099 | 3802.510187      |        |
| 1871.99507                          | 1552.428886                                            | 1062.771304 | 3604.721072      |        |
| 1495.731753                         | 1.26960103                                             | 3.88E-11    | 4.87E-09         | LAPTM5 |
| 1                                   | 30732469                                               | 30757820    | - 3274           |        |
| protein_coding                      | lysosomal protein transmembrane 5 [Source:HGNC         |             |                  |        |
| Symbol;Acc:HGNC:29612]              | -                                                      | 4327 3487   | 3271 1807        | 1360   |
| 1232                                | 64.71976083                                            | 50.46609642 | 62.15967222      |        |
| 30.6684284                          | 25.53333795                                            | 17.49697821 |                  |        |
| ENSG00000188610                     | 506.246039                                             | 444.2675669 | 442.9093186      |        |
| 112.9205659                         | 180.3557089                                            | 108.6925197 | 464.4743082      |        |
| 133.9895982                         | 1.798135228                                            | 3.95E-11    | 4.91E-09         | FAM72B |
| 1                                   | 121167646                                              | 121185539   | - 3033           |        |
| protein_coding                      | family with sequence similarity 72 member B            |             |                  |        |
| [Source:HGNC Symbol;Acc:HGNC:24805] | -                                                      |             | 558 502          | 381    |
| 109                                 | 158 126                                                | 9.00928804  | 7.842558152      |        |

|                                                                       |              |             |             |                            |
|-----------------------------------------------------------------------|--------------|-------------|-------------|----------------------------|
| 7.815547591                                                           | 1.996945127  | 3.202078959 | 1.931653178 |                            |
| ENSG00000132205                                                       | 131.5513901  | 159.2991276 | 266.2105878 |                            |
| 10.35968495                                                           | 18.26386925  | 31.05500563 | 185.6870352 |                            |
| 19.89285328                                                           | 3.207140069  | 4.36E-11    | 5.40E-09    |                            |
| EMILIN2                                                               | 18           | 2847030     | 2915993     | + 6435 protein_coding      |
| elastin microfibril interfacier 2 [Source:HGNC Symbol;Acc:HGNC:19881] |              |             |             |                            |
| -                                                                     | 145          | 180         | 229         | 10 16 36                   |
| 1.103438504                                                           | 1.325410463  | 2.21408239  | 0.086350229 |                            |
| 0.152833582                                                           | 0.260126722  |             |             |                            |
| ENSG00000179218                                                       | 16494.72981  | 15905.13289 | 18384.80544 |                            |
| 10497.46876                                                           | 7514.440705  | 7431.635375 | 16928.22272 |                            |
| 8481.181613                                                           | 0.997085423  | 4.94E-11    | 6.07E-09    | CALR                       |
| 19                                                                    | 12938578     | 12944489    | + 2714      |                            |
| protein_coding calreticulin [Source:HGNC Symbol;Acc:HGNC:1455] -      |              |             |             |                            |
| 18181                                                                 | 17972        | 15815       | 10133       | 6583 8615 328.0474053      |
|                                                                       | 313.7711485  | 362.5485726 | 207.4628038 | 149.0944139                |
|                                                                       | 147.5966351  |             |             |                            |
| ENSG00000168056                                                       | 2039.500172  | 1842.559909 | 3287.526386 |                            |
| 891.9688741                                                           | 1007.937284  | 932.5128079 | 2389.862155 |                            |
| 944.1396554                                                           | 1.339325045  | 5.10E-11    | 6.22E-09    | LTBP3                      |
| 11                                                                    | 65538805     | 65558930    | - 10298     |                            |
| protein_coding latent transforming growth factor beta binding protein |              |             |             |                            |
| 3 [Source:HGNC Symbol;Acc:HGNC:6716] -                                |              |             |             |                            |
| 861                                                                   | 883          | 1081        | 10.6898621  | 9.579752271 2248 2082 2828 |
| 17.08572312                                                           | 4.645819233  | 5.27054076  | 4.880943996 |                            |
| ENSG00000121064                                                       | 564.3101008  | 631.8865393 | 774.2194388 |                            |
| 216.5174154                                                           | 195.1951026  | 272.5939383 | 656.8053597 |                            |
| 228.1021521                                                           | 1.522300066  | 5.18E-11    | 6.25E-09    | SCPEP1                     |
| 17                                                                    | 56978105     | 57006768    | + 3853      |                            |
| protein_coding serine carboxypeptidase 1 [Source:HGNC                 |              |             |             |                            |
| Symbol;Acc:HGNC:29507] -                                              |              |             |             |                            |
| 316                                                                   | 7.905331008  | 8.780629321 | 10.75429801 | 666 209 171                |
| 3.014111547                                                           | 2.7280006    | 3.81345909  |             |                            |
| ENSG00000198804                                                       | 99462.83065  | 94057.28487 | 71200.28857 |                            |
| 144700.9715                                                           | 206339.4873  | 215401.8322 | 88240.1347  |                            |
| 188814.097                                                            | -1.097447897 | 5.19E-11    | 6.25E-09    | MT-C01                     |
| MT                                                                    | 5904         | 7445        | + 1542      | protein_coding             |
| mitochondrially encoded cytochrome c oxidase I [Source:HGNC           |              |             |             |                            |
| Symbol;Acc:HGNC:7419] -                                               |              |             |             |                            |
| 249701                                                                | 3481.590474  | 3265.830291 | 2471.236926 | 61248 139677 180763        |
| 5033.297127                                                           | 7205.639441  | 7529.513669 |             |                            |
| ENSG00000130821                                                       | 4972.642545  | 5486.969949 | 5436.973447 |                            |
| 8653.444838                                                           | 9070.294067  | 9508.007557 | 5298.86198  |                            |
| 9077.248821                                                           | -0.776668103 | 6.25E-11    | 7.47E-09    | SLC6A8                     |
| X                                                                     | 153688099    | 153696593   | + 5498      |                            |
| protein_coding solute carrier family 6 member 8 [Source:HGNC          |              |             |             |                            |
| Symbol;Acc:HGNC:11055] -                                              |              |             |             |                            |
| 11022                                                                 | 48.81842345  | 53.43347202 | 52.92604979 | 4677 8353 7946             |
| 84.42086341                                                           | 88.83644797  | 93.21519004 |             |                            |
| ENSG00000237649                                                       | 2027.705909  | 1936.369395 | 2341.258183 |                            |



|                        |                                                        |                 |             |         |
|------------------------|--------------------------------------------------------|-----------------|-------------|---------|
| 1096.054668            | 784.204886                                             | 581.4187165     | 2101.777829 |         |
| 820.5594234            | 1.357557699                                            | 6.88E-11        | 8.17E-09    | KIFC1   |
| 6                      | 33391536                                               | 33409924        | + 3345      |         |
| protein_coding         | kinesin family member C1 [Source:HGNC                  |                 |             |         |
| Symbol;Acc:HGNC:6389]  | -                                                      | 2235 2188       | 2014 1058   | 687     |
| 674                    | 32.71975845                                            | 30.99400055     | 37.46020854 |         |
| 17.57525315            | 12.62431944                                            | 9.369033516     |             |         |
| ENSG0000011028         | 4734.03554                                             | 4614.364728     | 7630.59519  |         |
| 941.6953619            | 1327.554996                                            | 628.863864      | 5659.665153 |         |
| 966.038074             | 2.550939335                                            | 7.82E-11        | 9.22E-09    | MRC2    |
| 17                     | 62627401                                               | 62693597        | + 6860      |         |
| protein_coding         | mannose receptor C type 2 [Source:HGNC                 |                 |             |         |
| Symbol;Acc:HGNC:16875] | -                                                      | 5218 5214       | 6564 909    | 1163    |
| 729                    | 37.2484875                                             | 36.01416516     | 59.5321138  |         |
| 7.36294932             | 10.42084555                                            | 4.941222732     |             |         |
| ENSG00000142892        | 1154.023229                                            | 956.6797605     | 1105.529559 |         |
| 538.7036173            | 410.9370581                                            | 427.0063274     | 1072.077516 |         |
| 458.8823343            | 1.224077931                                            | 8.24E-11        | 9.66E-09    | PIGK    |
| 1                      | 77088990                                               | 77219430        | - 5513      |         |
| protein_coding         | phosphatidylinositol glycan anchor biosynthesis class  |                 |             |         |
| K [Source:HGNC         | Symbol;Acc:HGNC:8965]                                  | -               | 1272 1081   | 951     |
| 520                    | 360 495                                                | 11.29868244     | 9.291035988 |         |
| 10.73246229            | 5.241159722                                            | 4.013856746     | 4.174920641 |         |
| ENSG00000137831        | 2501.290913                                            | 1681.490791     | 1985.535738 |         |
| 1056.687865            | 727.1302945                                            | 675.4463725     | 2056.105814 |         |
| 819.7548439            | 1.327048303                                            | 8.69E-11        | 1.01E-08    | UACA    |
| 15                     | 70654554                                               | 70763593        | - 11031     |         |
| protein_coding         | uveal autoantigen with coiled-coil domains and ankyrin |                 |             |         |
| repeats [Source:HGNC   | Symbol;Acc:HGNC:15947]                                 | -               | 2757 1900   |         |
| 1708                   | 1020 637                                               | 783 12.23913049 | 8.161409274 |         |
| 9.633405209            | 5.138038224                                            | 3.549538638     | 3.300486005 |         |
| ENSG00000235385        | 75.30183018                                            | 53.98470434     | 36.03724115 |         |
| 293.1790841            | 275.0995306                                            | 236.3630984     | 55.10792522 |         |
| 268.2139044            | -2.274736666                                           | 8.79E-11        | 1.02E-08    |         |
| LINC02154              | X 13266048                                             | 13303452        | -           | 1557    |
| lincRNA                | long intergenic non-protein coding RNA                 | 2154            |             |         |
| [Source:HGNC           | Symbol;Acc:HGNC:53015]                                 | -               | 83 61       | 31      |
| 283                    | 241 274                                                | 2.610466735     | 1.856383345 |         |
| 1.238739333            | 10.09973239                                            | 9.514276974     | 8.182631028 |         |
| ENSG00000166833        | 1690.20855                                             | 1134.563786     | 1564.713761 |         |
| 695.1348601            | 450.8892721                                            | 353.6820086     | 1463.162032 |         |
| 499.9020469            | 1.550121745                                            | 9.69E-11        | 1.11E-08    | NAV2    |
| 11                     | 19350724                                               | 20121598        | + 14673     |         |
| protein_coding         | neuron navigator 2 [Source:HGNC                        |                 |             |         |
| Symbol;Acc:HGNC:15997] | -                                                      | 1863 1282       | 1346 671    | 395 410 |
| 6.217597738            | 4.139954313                                            | 5.707330061     | 2.541064251 |         |
| 1.654723895            | 1.299259668                                            |                 |             |         |
| ENSG00000154229        | 3046.548744                                            | 2451.436574     | 3344.488477 |         |
| 1602.643262            | 1092.40768                                             | 927.3369737     | 2947.491265 |         |
| 1207.462638            | 1.28770793                                             | 1.09E-10        | 1.24E-08    | PRKCA   |

|                              |                                                  |                        |                      |                |        |
|------------------------------|--------------------------------------------------|------------------------|----------------------|----------------|--------|
| 17                           | 66302636                                         | 66810743               | +                    | 11152          |        |
| protein_coding               | protein kinase C alpha                           | [Source:HGNC           |                      |                |        |
| Symbol;Acc:HGNC:9393]        | -                                                | 3358 2770              | 2877                 | 1547           | 957    |
| 1075                         | 14.74540191                                      | 11.76937631            | 16.0506989           |                |        |
| 7.708140046                  | 5.274806555                                      | 4.482153458            |                      |                |        |
| ENSG00000143401              | 4029.10154                                       | 2847.914403            | 3438.6503            |                |        |
| 1908.253968                  | 1302.442176                                      | 1331.914686            | 3438.555414          |                |        |
| 1514.20361                   | 1.183301965                                      | 1.10E-10               | 1.25E-08             |                | ANP32E |
| 1                            | 150218417                                        | 150236156              | -                    | 3605           |        |
| protein_coding               | acidic nuclear phosphoprotein 32 family member E | [Source:HGNC           |                      |                |        |
| Symbol;Acc:HGNC:16673]       | -                                                | 4441 3218              | 2958                 |                |        |
| 1842                         | 1141 1544                                        | 60.32595248            | 42.29677077          |                |        |
| 51.05047028                  | 28.39202707                                      | 19.45484323            | 19.91466683          |                |        |
| ENSG00000105472              | 1787.284403                                      | 2404.531831            | 2598.168838          |                |        |
| 1169.608431                  | 978.2584967                                      | 908.3589147            | 2263.328357          |                |        |
| 1018.741947                  | 1.151616133                                      | 1.22E-10               | 1.37E-08             |                |        |
| CLEC11A 19                   | 50723329                                         | 50725718               | +                    | 1469           |        |
| protein_coding               | C-type lectin domain containing 11A              | [Source:HGNC           |                      |                |        |
| Symbol;Acc:HGNC:10576]       | -                                                | 1970 2717              | 2235 1129            | 857            |        |
| 1053                         | 65.67092203                                      | 87.63836839            | 94.65914519          |                |        |
| 42.70553725                  | 35.85967807                                      | 33.33017497            |                      |                |        |
| ENSG00000158109              | 975.2947884                                      | 1108.898927            | 999.7428189          |                |        |
| 1752.858693                  | 2295.540066                                      | 2518.906012            | 1027.978845          |                |        |
| 2189.101591                  | -1.090559364                                     | 1.33E-10               | 1.49E-08             |                | TPRG1L |
| 1                            | 3625002 3630127                                  | +                      | 2414                 | protein_coding | tumor  |
| protein p63 regulated 1 like | [Source:HGNC                                     | Symbol;Acc:HGNC:27007] |                      |                |        |
| -                            | 1075 1253                                        | 860 1692               | 2011 2920            |                |        |
| 21.80719877                  | 24.59462732                                      | 22.16501513            | 38.94710098          |                |        |
| 51.20615483                  | 56.24405235                                      |                        |                      |                |        |
| ENSG00000101057              | 3622.653107                                      | 3980.708199            | 4237.282064          |                |        |
| 2255.303413                  | 1972.497879                                      | 1516.519442            | 3946.881123          |                |        |
| 1914.773578                  | 1.043934238                                      | 1.39E-10               | 1.54E-08             |                | MYBL2  |
| 20                           | 43667019                                         | 43716496               | +                    | 2777           |        |
| protein_coding               | MYB proto-oncogene like 2                        | [Source:HGNC           |                      |                |        |
| Symbol;Acc:HGNC:7548]        | MYB                                              | 3993 4498              | 3645 2177            | 1728           |        |
| 1758                         | 70.41288097                                      | 76.74852049            | 81.66359593          |                |        |
| 43.56067421                  | 38.24857139                                      | 29.43567567            |                      |                |        |
| ENSG00000166825              | 1099.588171                                      | 1087.659043            | 1656.550601          |                |        |
| 555.2791133                  | 478.285076                                       | 319.1764468            | 1281.265938          |                |        |
| 450.9135453                  | 1.507406541                                      | 1.47E-10               | 1.62E-08             |                | ANPEP  |
| 15                           | 89784889                                         | 89815401               | -                    | 4871           |        |
| protein_coding               | "alanyl aminopeptidase, membrane                 | [Source:HGNC           |                      |                |        |
| Symbol;Acc:HGNC:500]"        | -                                                | 1212 1229              | 1425 536             | 419            |        |
| 370                          | 12.18465323                                      | 11.95529217            | 18.20134918          |                |        |
| 6.114468384                  | 5.287413233                                      | 3.531950535            |                      |                |        |
| ENSG00000166710              | 11441.34193                                      | 13251.03243            | 16657.34285          |                |        |
| 7480.728502                  | 7120.626024                                      | 6922.678338            | 13783.23907          |                |        |
| 7174.677621                  | 0.941830414                                      | 1.53E-10               | 1.69E-08             |                | B2M    |
| 15                           | 44711487                                         | 44718877               | +                    | 6079           |        |
| protein_coding               | beta-2-microglobulin                             | [Source:HGNC           | Symbol;Acc:HGNC:914] |                |        |

|                        |                                                       |             |             |            |             |             |        |  |
|------------------------|-------------------------------------------------------|-------------|-------------|------------|-------------|-------------|--------|--|
| -                      | 12611                                                 | 14973       | 14329       | 7221       | 6238        | 8025        |        |  |
| 101.5888551            | 116.7086706                                           |             | 146.6528765 |            | 66.00506229 |             |        |  |
| 63.07548335            | 61.38240719                                           |             |             |            |             |             |        |  |
| ENSG00000196611        | 789.3083404                                           |             | 949.5997993 |            | 683.5450901 |             |        |  |
| 2129.951226            | 1703.105808                                           |             | 1595.019595 |            | 807.4844099 |             |        |  |
| 1809.358876            | -1.162750705                                          |             | 1.57E-10    |            | 1.71E-08    |             | MMP1   |  |
| 11                     | 102789920                                             |             | 102798160   |            | -           | 1970        |        |  |
| protein_coding         | matrix metalloproteinase 1 [Source:HGNC               |             |             |            |             |             |        |  |
| Symbol;Acc:HGNC:7155]  | -                                                     |             | 870         | 1073       | 588         | 2056        | 1492   |  |
| 1849                   | 21.62627444                                           |             | 25.80833199 |            | 18.57025839 |             |        |  |
| 57.99211231            | 46.55324481                                           |             | 43.64170438 |            |             |             |        |  |
| ENSG00000182628        | 1472.468318                                           |             | 1158.458655 |            | 1385.690047 |             |        |  |
| 701.350671             | 476.0020923                                           |             | 471.8635578 |            | 1338.87234  |             |        |  |
| 549.7387737            | 1.28436632                                            |             | 1.68E-10    |            | 1.82E-08    |             | SKA2   |  |
| 17                     | 59109951                                              |             | 59155269    |            | -           | 3148        |        |  |
| protein_coding         | spindle and kinetochore associated complex subunit 2  |             |             |            |             |             |        |  |
| [Source:HGNC           | Symbol;Acc:HGNC:28006]                                | -           |             |            | 1623        | 1309        | 1192   |  |
| 677                    | 417                                                   | 547         | 25.24715694 |            | 19.70295492 |             |        |  |
| 23.55854033            | 11.94994726                                           |             | 8.142329842 |            | 8.079483917 |             |        |  |
| ENSG00000165304        | 2116.616504                                           |             | 1731.935515 |            | 2021.572979 |             |        |  |
| 1053.579959            | 779.6389186                                           |             | 613.3363612 |            | 1956.708332 |             |        |  |
| 815.518413             | 1.263338989                                           |             | 1.70E-10    |            | 1.84E-08    |             | MELK   |  |
| 9                      | 36572862                                              |             | 36677683    |            | +           | 3087        |        |  |
| protein_coding         | maternal embryonic leucine zipper kinase [Source:HGNC |             |             |            |             |             |        |  |
| Symbol;Acc:HGNC:16870] | -                                                     |             | 2333        | 1957       | 1739        | 1017        | 683    |  |
| 711                    | 37.00895249                                           |             | 30.03866565 |            | 35.04852932 |             |        |  |
| 18.30612262            | 13.59976595                                           |             | 10.70937163 |            |             |             |        |  |
| ENSG00000159261        | 13.60876449                                           |             | 18.58489822 |            | 25.5748163  |             |        |  |
| 98.41700702            | 163.2333314                                           |             | 222.5608737 |            | 19.25615967 |             |        |  |
| 161.4037374            | -3.079504635                                          |             | 1.81E-10    |            | 1.94E-08    |             | CLDN14 |  |
| 21                     | 36460621                                              |             | 36576569    |            | -           | 2853        |        |  |
| protein_coding         | claudin 14 [Source:HGNC                               |             |             |            |             |             |        |  |
| Symbol;Acc:HGNC:2035]  | -                                                     |             |             |            | 258         | 0.257464983 |        |  |
| 15                     | 21                                                    | 22          | 95          | 143        |             |             |        |  |
| 0.348773889            |                                                       | 0.479764109 |             | 1.85026476 |             | 3.080928545 |        |  |
| 4.204834941            |                                                       |             |             |            |             |             |        |  |
| ENSG00000124762        | 968.9440317                                           |             | 1285.012962 |            | 1195.041416 |             |        |  |
| 1948.656739            | 3036.368263                                           |             | 3002.846517 |            | 1149.666137 |             |        |  |
| 2662.623839            | -1.211803196                                          |             | 1.91E-10    |            | 2.04E-08    |             | CDKN1A |  |
| 6                      | 36676460                                              |             | 36687339    |            | +           | 3050        |        |  |
| protein_coding         | cyclin dependent kinase inhibitor 1A [Source:HGNC     |             |             |            |             |             |        |  |
| Symbol;Acc:HGNC:1784]  | -                                                     |             | 1068        | 1452       | 1028        | 1881        | 2660   |  |
| 3481                   | 17.14747178                                           |             | 22.55761696 |            | 20.97008167 |             |        |  |
| 34.26896594            | 53.60794477                                           |             | 53.06830324 |            |             |             |        |  |
| ENSG00000090889        | 2916.811856                                           |             | 2114.253421 |            | 2843.454576 |             |        |  |
| 1380.946004            | 858.4018548                                           |             | 680.6222067 |            | 2624.839951 |             |        |  |
| 973.3233551            | 1.431643586                                           |             | 2.04E-10    |            | 2.16E-08    |             | KIF4A  |  |
| X                      | 70290090                                              |             | 70420832    |            | +           | 4533        |        |  |
| protein_coding         | kinesin family member 4A [Source:HGNC                 |             |             |            |             |             |        |  |
| Symbol;Acc:HGNC:13339] | -                                                     |             | 3215        | 2389       | 2446        | 1333        | 752    |  |
| 789                    | 34.73153211                                           |             | 24.97220385 |            | 33.57202828 |             |        |  |

|                        |                                                    |             |             |             |             |
|------------------------|----------------------------------------------------|-------------|-------------|-------------|-------------|
| 16.34016637            | 10.19716582                                        | 8.093237819 |             |             |             |
| ENSG00000128039        | 601.5073904                                        | 863.7552694 | 566.1334335 |             |             |
| 1366.442445            | 1717.945201                                        | 1767.547404 | 677.1320311 |             |             |
| 1617.311683            | -1.255003306                                       | 2.11E-10    | 2.22E-08    |             | SRD5A3      |
| 4                      | 55346109                                           | 55373096    | +           | 4420        |             |
| protein_coding         | steroid 5 alpha-reductase 3 [Source:HGNC           |             |             |             |             |
| Symbol;Acc:HGNC:25812] | -                                                  | 663         | 976         | 487         | 1319        |
| 2049                   | 7.345475975                                        | 10.46294613 | 6.855095958 |             | 1505        |
| 16.58191062            | 20.92963193                                        | 21.55513301 |             |             |             |
| ENSG00000171604        | 1245.655576                                        | 1155.80367  | 1626.325818 |             |             |
| 661.9838682            | 554.7650285                                        | 477.9020311 | 1342.595021 |             |             |
| 564.8836426            | 1.249003171                                        | 2.24E-10    | 2.35E-08    |             | CXXC5       |
| 5                      | 139647299                                          | 139683882   | +           | 3852        |             |
| protein_coding         | CXXC finger protein 5 [Source:HGNC                 |             |             |             |             |
| Symbol;Acc:HGNC:26943] | -                                                  | 1373        | 1306        | 1399        | 639         |
| 554                    | 17.45472225                                        | 16.06509653 | 22.59634946 |             | 486         |
| 9.217786043            | 7.755277654                                        | 6.687356939 |             |             |             |
| ENSG00000101439        | 1922.464797                                        | 1933.71441  | 2679.543253 |             |             |
| 1064.975613            | 1067.294859                                        | 920.4358613 | 2178.574153 |             |             |
| 1017.568778            | 1.098096006                                        | 2.35E-10    | 2.44E-08    |             | CST3        |
| 20                     | 23626706                                           | 23638473    | -           | 3695        |             |
| protein_coding         | cystatin C [Source:HGNC Symbol;Acc:HGNC:2475]      |             | -           |             |             |
| 2119                   | 2185                                               | 2305        | 1028        | 935         | 1067        |
|                        | 28.01969731                                        | 38.81175968 | 15.4593317  | 15.55408716 | 28.08310977 |
|                        | 13.42706202                                        |             |             |             |             |
| ENSG00000145147        | 2173.773314                                        | 1796.540161 | 2559.806613 |             |             |
| 1155.104872            | 964.5605948                                        | 870.4027967 | 2176.706696 |             |             |
| 996.6894211            | 1.126843682                                        | 2.36E-10    | 2.44E-08    |             | SLIT2       |
| 4                      | 20253260                                           | 20620561    | +           | 9712        |             |
| protein_coding         | slit guidance ligand 2 [Source:HGNC                |             |             |             |             |
| Symbol;Acc:HGNC:11086] | -                                                  | 2396        | 2030        | 2202        | 1115        |
| 1009                   | 12.08110958                                        | 9.904072367 | 14.10637704 |             | 845         |
| 6.379376545            | 5.348049218                                        | 4.830738299 |             |             |             |
| ENSG00000123689        | 710.3775064                                        | 517.7221646 | 656.8077822 |             |             |
| 263.1359977            | 200.9025618                                        | 226.8740689 | 628.3024844 |             |             |
| 230.3042095            | 1.44702249                                         | 2.38E-10    | 2.45E-08    |             | G0S2        |
| 1                      | 209675420                                          | 209676388   | +           | 866         |             |
| protein_coding         | G0/G1 switch 2 [Source:HGNC Symbol;Acc:HGNC:30229] |             |             |             |             |
| -                      | 783                                                | 585         | 565         | 254         | 176         |
| 44.27642562            | 32.00843311                                        | 40.59171516 | 16.29775813 |             |             |
| 12.49229226            | 14.12111125                                        |             |             |             |             |
| ENSG00000141526        | 3749.668242                                        | 4127.617394 | 6480.890948 |             |             |
| 2175.533839            | 2217.918622                                        | 1671.79447  | 4786.058862 |             |             |
| 2021.748977            | 1.243237496                                        | 2.43E-10    | 2.49E-08    |             |             |
| SLC16A3                | 17                                                 | 82228397    | 82261129    | +           | 8995        |
| protein_coding         | solute carrier family 16 member 3 [Source:HGNC     |             |             |             |             |
| Symbol;Acc:HGNC:10924] | -                                                  | 4133        | 4664        | 5575        | 2100        |
| 1938                   | 22.50053897                                        | 24.56879264 | 38.56120091 |             | 1943        |
| 12.9726939             | 13.27758203                                        | 10.01805988 |             |             |             |
| ENSG00000175063        | 2416.916573                                        | 2408.956807 | 2800.442385 |             |             |

|                                                                        |                                                |             |                |        |
|------------------------------------------------------------------------|------------------------------------------------|-------------|----------------|--------|
| 1199.651517                                                            | 961.1361193                                    | 481.3525873 | 2542.105255    |        |
| 880.7134079                                                            | 1.530288537                                    | 2.73E-10    | 2.78E-08       | UBE2C  |
| 20                                                                     | 45812576                                       | 45816957    | + 1286         |        |
| protein_coding                                                         | ubiquitin conjugating enzyme E2 C [Source:HGNC |             |                |        |
| Symbol;Acc:HGNC:15937]                                                 | -                                              | 2664 2722   | 2409 1158      | 842    |
| 558                                                                    | 101.4429653                                    | 100.2936861 | 116.5474238    |        |
| 50.03566019                                                            | 40.24560711                                    | 20.17549731 |                |        |
| ENSG00000212907                                                        | 10841.64904                                    | 9192.444655 | 7106.311456    |        |
| 16778.54574                                                            | 18002.46762                                    | 17958.41964 | 9046.801718    |        |
| 17579.811                                                              | -0.958265959                                   | 2.75E-10    | 2.78E-08       | MT-    |
| ND4L MT                                                                | 10470 10766                                    | + 297       | protein_coding |        |
| mitochondrially encoded NADH:ubiquinone oxidoreductase core subunit 4L |                                                |             |                |        |
| [Source:HGNC Symbol;Acc:HGNC:7460]                                     | -                                              |             | 11950 10387    | 6113   |
| 16196                                                                  | 15771 20818                                    | 1970.335306 | 1657.143521    |        |
| 1280.574334                                                            | 3030.144661                                    | 3263.999944 | 3259.219222    |        |
| ENSG0000001036                                                         | 1811.780179                                    | 1693.880723 | 1902.998831    |        |
| 1017.321062                                                            | 655.2163094                                    | 640.9408106 | 1802.886578    |        |
| 771.159394                                                             | 1.225362845                                    | 2.85E-10    | 2.87E-08       | FUCA2  |
| 6                                                                      | 143494811                                      | 143511690   | - 2793         |        |
| protein_coding                                                         | alpha-L-fucosidase 2 [Source:HGNC              |             |                |        |
| Symbol;Acc:HGNC:4008]                                                  | -                                              | 1997 1914   | 1637 982       | 574    |
| 743                                                                    | 35.01352315                                    | 32.4711327  | 36.46570299    |        |
| 19.53676244                                                            | 12.6324712                                     | 12.36940747 |                |        |
| ENSG00000107731                                                        | 1430.734773                                    | 1192.973466 | 2195.946727    |        |
| 590.5020421                                                            | 639.2354238                                    | 657.3309525 | 1606.551655    |        |
| 629.0228061                                                            | 1.351732457                                    | 2.91E-10    | 2.90E-08       | UNC5B  |
| 10                                                                     | 71212570                                       | 71302864    | + 6841         |        |
| protein_coding                                                         | unc-5 netrin receptor B [Source:HGNC           |             |                |        |
| Symbol;Acc:HGNC:12568]                                                 | -                                              | 1577 1348   | 1889 570       | 560    |
| 762                                                                    | 11.28861825                                    | 9.336771762 | 17.17984393    |        |
| 4.629854138                                                            | 5.031712247                                    | 5.179244327 |                |        |
| ENSG00000203805                                                        | 440.9239695                                    | 322.1382357 | 485.9215097    |        |
| 134.6759043                                                            | 106.15874                                      | 56.93417699 | 416.327905     |        |
| 99.25627378                                                            | 2.07262119                                     | 3.22E-10    | 3.20E-08       | PLPP4  |
| 10                                                                     | 120456954                                      | 120589855   | + 1785         |        |
| protein_coding                                                         | phospholipid phosphatase 4 [Source:HGNC        |             |                |        |
| Symbol;Acc:HGNC:23531]                                                 | -                                              | 486 364     | 418 130        | 93     |
| 66                                                                     | 13.33296479                                    | 9.66250216  | 14.56950873    |        |
| 4.046850637                                                            | 3.202521753                                    | 1.719240896 |                |        |
| ENSG00000099901                                                        | 5136.854969                                    | 6173.726188 | 6042.631596    |        |
| 3281.948192                                                            | 3328.590171                                    | 3301.319626 | 5784.404251    |        |
| 3303.952663                                                            | 0.807917121                                    | 3.29E-10    | 3.25E-08       | RANBP1 |
| 22                                                                     | 20115938                                       | 20127357    | + 4622         |        |
| protein_coding                                                         | RAN binding protein 1 [Source:HGNC             |             |                |        |
| Symbol;Acc:HGNC:9847]                                                  | -                                              | 5662 6976   | 5198 3168      | 2916   |
| 3827                                                                   | 59.98858354                                    | 71.5159598  | 69.97021053    |        |
| 38.08616771                                                            | 38.77974408                                    | 38.49989448 |                |        |
| ENSG00000137812                                                        | 1606.741461                                    | 1014.204445 | 1261.30344     |        |
| 592.5739791                                                            | 283.0899734                                    | 233.7751813 | 1294.083115    |        |
| 369.8130446                                                            | 1.807920633                                    | 3.31E-10    | 3.25E-08       | KNL1   |

|                         |                                            |                       |                |             |             |
|-------------------------|--------------------------------------------|-----------------------|----------------|-------------|-------------|
| 15                      | 40594020                                   | 40664342              | +              | 10250       |             |
| protein_coding          | kinetochore scaffold 1                     | [Source:HGNC          |                |             |             |
| Symbol;Acc:HGNC:24054]  | -                                          | 1771 1146             | 1085           | 572         | 248         |
| 271                     | 8.461032814                                | 5.297697948           | 6.585863412    |             |             |
| 3.100874624             | 1.487219858                                | 1.229352542           |                |             |             |
| ENSG00000221955         | 384.6744096                                | 423.9126783           | 320.8476954    |             |             |
| 821.5230165             | 875.5242322                                | 911.8094709           | 376.4782611    |             |             |
| 869.6189065             | -1.206105702                               | 3.39E-10              | 3.31E-08       |             |             |
| SLC12A8 3               | 125082636                                  | 125212864             | -              | 5586        |             |
| protein_coding          | solute carrier family 12 member 8          | [Source:HGNC          |                |             |             |
| Symbol;Acc:HGNC:15595]  | -                                          | 424 479               | 276            | 793         | 767         |
| 1057                    | 3.717008967                                | 4.063132854           | 3.07407881     |             |             |
| 7.888315997             | 8.439987293                                | 8.79842779            |                |             |             |
| ENSG00000162063         | 1037.895105                                | 845.1703712           | 1171.791583    |             |             |
| 478.6174446             | 331.0326302                                | 422.6931322           | 1018.285686    |             |             |
| 410.781069              | 1.308124045                                | 3.45E-10              | 3.35E-08       |             | CCNF        |
| 16                      | 2429394 2458854                            | + 6309                | protein_coding |             | cyclin      |
| F [Source:HGNC          | Symbol;Acc:HGNC:1591]                      | -                     | 1144           | 955         | 1008        |
| 462                     | 290 490                                    | 8.879615909           | 7.172478994    |             |             |
| 9.940468452             | 4.06905436                                 | 2.825431812           | 3.61132497     |             |             |
| ENSG00000181019         | 1077.814148                                | 1205.363399           | 1519.376586    |             |             |
| 630.9048134             | 521.6617655                                | 506.3691196           | 1267.518044    |             |             |
| 552.9785661             | 1.196234425                                | 3.63E-10              | 3.51E-08       |             | NQ01        |
| 16                      | 69706996                                   | 69726951              | -              | 3254        |             |
| protein_coding          | NAD(P)H quinone dehydrogenase 1            | [Source:HGNC          |                |             |             |
| Symbol;Acc:HGNC:2874]   | -                                          | 1188 1362             | 1307           | 609         | 457         |
| 587                     | 17.87835578                                | 19.83288985           | 24.98992114    |             |             |
| 10.39948392             | 8.632687336                                | 8.38786768            |                |             |             |
| ENSG00000137804         | 248.5867647                                | 238.9486913           | 265.0480962    |             |             |
| 65.26601518             | 68.48950969                                | 61.24737221           | 250.8611841    |             |             |
| 65.00096569             | 1.949438747                                | 3.65E-10              | 3.51E-08       |             | NUSAP1      |
| 15                      | 41332694                                   | 41381050              | +              | 2875        |             |
| protein_coding          | nucleolar and spindle associated protein 1 | [Source:HGNC          |                |             |             |
| Symbol;Acc:HGNC:18538]  | -                                          |                       | 274            | 270         | 228         |
| 63                      | 60 71                                      | 4.667038648           | 4.449921563    |             |             |
| 4.93405339              | 1.21762833                                 | 1.282805347           | 1.148289828    |             |             |
| ENSG00000168140         | 355.6423787                                | 301.7833472           | 635.8829325    |             |             |
| 134.6759043             | 78.76293614                                | 66.42320649           | 431.1028861    |             |             |
| 93.28734899             | 2.208504174                                | 3.81E-10              | 3.64E-08       |             | VASN        |
| 16                      | 4371848 4383528                            | + 2806                | protein_coding |             |             |
| vasorin [Source:HGNC    | Symbol;Acc:HGNC:18517]                     | -                     | 392            | 341         |             |
| 547                     | 130 69                                     | 77                    | 6.841118038    | 5.758284962 |             |
| 12.12848363             | 2.574350815                                | 1.511502202           | 1.275951235    |             |             |
| ENSG00000162576         | 3867.610868                                | 4540.025136           | 7365.547094    |             |             |
| 2380.655601             | 2264.719787                                | 1700.261558           | 5257.727699    |             |             |
| 2115.212316             | 1.313627719                                | 3.86E-10              | 3.67E-08       |             | MXRA8       |
| 1                       | 1352689 1361777                            | - 3622                | protein_coding |             | matrix      |
| remodeling associated 8 | [Source:HGNC                               | Symbol;Acc:HGNC:7542] |                |             |             |
| 4263                    | 5130 6336                                  | 2298                  | 1984           | 1971        | 57.63623059 |
| 67.11125494             | 108.8362499                                | 35.25442389           | 33.66980352    |             |             |

|                                 |                                                                             |             |             |             |      |             |      |
|---------------------------------|-----------------------------------------------------------------------------|-------------|-------------|-------------|------|-------------|------|
|                                 | 25.30283576                                                                 |             |             |             |      |             |      |
| ENSG00000136153                 | 3049.270497                                                                 | 2027.523896 | 2751.617735 |             |      |             |      |
| 1387.161815                     | 1086.70022                                                                  | 926.4743346 | 2609.470709 |             |      |             |      |
| 1133.445457                     | 1.203343345                                                                 | 3.91E-10    | 3.69E-08    |             |      | LM07        |      |
| 13                              | 75620434                                                                    | 75859870    | +           | 14367       |      |             |      |
| protein_coding                  | LIM domain 7 [Source:HGNC Symbol;Acc:HGNC:6646] -                           |             |             |             |      |             |      |
| 3361                            | 2291                                                                        | 2367        | 1339        | 952         | 1074 | 11.45594986 |      |
|                                 | 7.55588672                                                                  | 10.25035751 | 5.178768872 | 4.073035701 |      |             |      |
|                                 | 3.475915481                                                                 |             |             |             |      |             |      |
| ENSG00000101384                 | 1885.267507                                                                 | 2067.348678 | 2500.519539 |             |      |             |      |
| 1105.378384                     | 898.3540688                                                                 | 1118.842842 | 2151.045241 |             |      |             |      |
| 1040.858432                     | 1.046169692                                                                 | 4.00E-10    | 3.77E-08    |             |      | JAG1        |      |
| 20                              | 10637684                                                                    | 10673999    | -           | 9298        |      |             |      |
| protein_coding                  | jagged 1 [Source:HGNC Symbol;Acc:HGNC:6188] -                               |             |             |             |      |             |      |
| 2078                            | 2336                                                                        | 2151        | 1067        | 787         | 1297 | 10.94421673 |      |
|                                 | 11.90446102                                                                 | 14.39321177 | 6.376566911 | 5.202745122 |      |             |      |
|                                 | 6.486067326                                                                 |             |             |             |      |             |      |
| ENSG00000170961                 | 573.3826105                                                                 | 742.5109335 | 594.0332331 |             |      |             |      |
| 1534.269341                     | 1453.119097                                                                 | 1195.617717 | 636.642259  |             |      |             |      |
| 1394.335385                     | -1.129939304                                                                | 4.47E-10    | 4.18E-08    |             |      | HAS2        |      |
| 8                               | 121612116                                                                   | 121641390   | -           | 4190        |      |             |      |
| protein_coding                  | hyaluronan synthase 2 [Source:HGNC Symbol;Acc:HGNC:4819] -                  |             |             |             |      |             |      |
| 1386                            | 7.386381569                                                                 | 9.487993504 | 7.587762412 | 511         | 1481 | 1273        |      |
| 19.6405244                      | 18.67504861                                                                 | 15.38084606 |             |             |      |             |      |
| ENSG00000185215                 | 927.2104872                                                                 | 692.0662097 | 1297.340681 |             |      |             |      |
| 356.3731622                     | 373.2678278                                                                 | 336.4292277 | 972.2057928 |             |      |             |      |
| 355.3567392                     | 1.451298123                                                                 | 4.57E-10    | 4.25E-08    |             |      |             |      |
| TNFAIP2                         | 14                                                                          | 103123442   | 103137439   | +           | 5029 |             |      |
| protein_coding                  | TNF alpha induced protein 2 [Source:HGNC Symbol;Acc:HGNC:11895] -           |             |             |             |      |             |      |
| 390                             | 9.951715313                                                                 | 7.368032931 | 13.80668465 | 1116        | 344  | 327         |      |
| 3.800921065                     | 3.99680976                                                                  | 3.605902582 |             |             |      |             |      |
| ENSG00000259781                 | 1362.690951                                                                 | 1321.297764 | 1599.58851  |             |      |             |      |
| 782.1562137                     | 597.0002261                                                                 | 602.1220536 | 1427.859075 |             |      |             |      |
| 660.4261645                     | 1.112069761                                                                 | 4.67E-10    | 4.32E-08    |             |      |             |      |
| HMGB1P6                         | 15                                                                          | 71164770    | 71165415    | -           | 646  |             |      |
| processed_pseudogene            | high mobility group box 1 pseudogene 6 [Source:HGNC Symbol;Acc:HGNC:4998] - |             |             |             |      |             |      |
| 755                             | 523                                                                         | 698         | 113.8586678 | 109.5099878 | 1502 | 1493        | 1376 |
| 132.5234589                     | 64.94212231                                                                 | 49.76414319 | 50.24049651 |             |      |             |      |
| ENSG0000013810                  | 2396.957052                                                                 | 2264.702597 | 2383.107882 |             |      |             |      |
| 1364.370508                     | 1012.503252                                                                 | 828.1334835 | 2348.255844 |             |      |             |      |
| 1068.335748                     | 1.1368083                                                                   | 4.96E-10    | 4.57E-08    |             |      | TACC3       |      |
| 4                               | 1721490                                                                     | 1745176     | +           | 6528        |      |             |      |
| transforming acidic coiled-coil | containing protein 3 [Source:HGNC Symbol;Acc:HGNC:11524] -                  |             |             |             |      |             |      |
| 960                             | 19.81898236                                                                 | 18.57447643 | 19.53802054 | 2050        | 1317 | 887         |      |
| 11.2103113                      | 8.352006705                                                                 | 6.837889926 |             |             |      |             |      |
| ENSG00000173207                 | 2068.532202                                                                 | 2567.370939 | 2497.032064 |             |      |             |      |

|                                     |                                                                           |             |                 |        |
|-------------------------------------|---------------------------------------------------------------------------|-------------|-----------------|--------|
| 1292.888682                         | 1263.631454                                                               | 1018.776712 | 2377.645069     |        |
| 1191.765616                         | 0.996988834                                                               | 5.70E-10    | 5.23E-08        | CKS1B  |
| 1                                   | 154974653                                                                 | 154979249   | + 2338          |        |
| protein_coding                      | CDC28 protein kinase regulatory subunit 1B                                |             |                 |        |
| [Source:HGNC Symbol;Acc:HGNC:19083] | -                                                                         |             | 2280 2901       | 2148   |
| 1248                                | 1107 1181                                                                 | 47.75501917 | 58.79354713     |        |
| 57.16057868                         | 29.66074958                                                               | 29.10385207 | 23.48747922     |        |
| ENSG00000123485                     | 1192.127769                                                               | 1154.918675 | 1250.841015     |        |
| 618.4731915                         | 378.975287                                                                | 297.6104706 | 1199.29582      |        |
| 431.6863163                         | 1.475124387                                                               | 5.84E-10    | 5.33E-08        | HJURP  |
| 2                                   | 233833416                                                                 | 233854566   | - 3821          |        |
| protein_coding                      | Holliday junction recognition protein [Source:HGNC Symbol;Acc:HGNC:25444] |             |                 |        |
|                                     | -                                                                         | 1314 1305   | 1076 597        | 332    |
| 345                                 | 16.84019093                                                               | 16.18303282 | 17.52032186     |        |
| 8.681791208                         | 5.340825717                                                               | 4.198296197 |                 |        |
| ENSG00000140961                     | 275.8042937                                                               | 491.17231   | 315.0352371     |        |
| 744.8613478                         | 1217.971781                                                               | 1325.876213 | 360.6706136     |        |
| 1096.236447                         | -1.602944233                                                              | 5.89E-10    | 5.34E-08        | OSGIN1 |
| 16                                  | 83948282                                                                  | 83966332    | + 3460          |        |
| protein_coding                      | oxidative stress induced growth inhibitor 1                               |             |                 |        |
| [Source:HGNC Symbol;Acc:HGNC:30093] | -                                                                         |             | 304 555         | 271    |
| 719                                 | 1067 1537                                                                 | 4.302552401 | 7.600520333     |        |
| 4.8730407                           | 11.54688486                                                               | 18.95551904 | 20.65517062     |        |
| ENSG00000142192                     | 10641.14658                                                               | 9008.365664 | 13612.77722     |        |
| 5920.559948                         | 5757.684781                                                               | 4224.343405 | 11087.42982     |        |
| 5300.862711                         | 1.064686539                                                               | 6.55E-10    | 5.92E-08        | APP    |
| 21                                  | 25880550                                                                  | 26171128    | - 6316          |        |
| protein_coding                      | amyloid beta precursor protein [Source:HGNC Symbol;Acc:HGNC:620]          |             |                 |        |
|                                     | -                                                                         | 11729 10179 | 11710 5715      | 5044   |
| 4897                                | 90.93845019                                                               | 76.36413449 | 115.3510681     |        |
| 50.27894508                         | 49.08856276                                                               | 36.05113987 |                 |        |
| ENSG00000277443                     | 4338.474119                                                               | 3718.749633 | 5963.582164     |        |
| 2054.325525                         | 2481.603234                                                               | 2067.745792 | 4673.601972     |        |
| 2201.22485                          | 1.086113572                                                               | 6.67E-10    | 5.98E-08        | MARCKS |
| 6                                   | 113857362                                                                 | 113863471   | + 4275          |        |
| protein_coding                      | myristoylated alanine rich protein kinase C substrate                     |             |                 |        |
| [Source:HGNC Symbol;Acc:HGNC:6759]  | -                                                                         |             | 4782 4202       | 5130   |
| 1983                                | 2174 2397                                                                 | 54.77749101 | 46.5743036      |        |
| 74.66001841                         | 25.77499791                                                               | 31.25869053 | 26.07131477     |        |
| ENSG00000154146                     | 444.5529733                                                               | 584.9817962 | 723.0698062     |        |
| 217.5533839                         | 162.0918396                                                               | 211.3465661 | 584.2015253     |        |
| 196.9972632                         | 1.565593398                                                               | 6.69E-10    | 5.98E-08        | NRGN   |
| 11                                  | 124739846                                                                 | 124747210   | + 1309          |        |
| protein_coding                      | neurogranin [Source:HGNC Symbol;Acc:HGNC:8000]                            |             |                 |        |
|                                     | -                                                                         |             |                 |        |
| 490                                 | 661 622                                                                   | 210 142     | 245 18.33095609 |        |
| 23.92700023                         | 29.56361819                                                               | 8.914391262 | 6.668007168     |        |
| 8.702768997                         |                                                                           |             |                 |        |
| ENSG00000169919                     | 941.7265027                                                               | 945.1748235 | 1283.390781     |        |
| 454.7901693                         | 386.9657298                                                               | 504.6438415 | 1056.764036     |        |
| 448.7999135                         | 1.233297713                                                               | 8.40E-10    | 7.47E-08        | GUSB   |



|                                            |                                                 |             |                        |             |                       |
|--------------------------------------------|-------------------------------------------------|-------------|------------------------|-------------|-----------------------|
| 7                                          | 65960684                                        | 65982314    | -                      | 3992        |                       |
| protein_coding                             | glucuronidase beta [Source:HGNC                 |             | Symbol;Acc:HGNC:4696]  |             |                       |
| -                                          | 1038 1068                                       | 1104 439    | 339                    | 585         |                       |
| 12.73313972                                | 12.67672768                                     | 17.20621667 | 6.11063061             |             |                       |
| 5.219832004                                | 6.813909351                                     |             |                        |             |                       |
| ENSG00000169744                            | 468.1414984                                     | 248.683638  | 609.1456245            |             |                       |
| 99.45297551                                | 119.856642                                      | 45.7198694  | 441.9902537            |             |                       |
| 88.34316229                                | 2.32780828                                      | 8.68E-10    | 7.67E-08               |             | LDB2                  |
| 4                                          | 16501541                                        | 16898809    | -                      | 5586        |                       |
| protein_coding                             | LIM domain binding 2 [Source:HGNC               |             | Symbol;Acc:HGNC:6533]  |             |                       |
| -                                          | -                                               | 516 281     | 524                    | 96          | 105                   |
| 53                                         | 4.52352978                                      | 2.383591507 | 5.836294553            |             |                       |
| 0.954953765                                | 1.155408952                                     | 0.441169984 |                        |             |                       |
| ENSG00000117632                            | 10323.60874                                     | 10381.87814 | 12293.3492             |             |                       |
| 6625.018525                                | 6579.558898                                     | 5615.780185 | 10999.61203            |             |                       |
| 6273.452536                                | 0.810153833                                     | 8.88E-10    | 7.82E-08               |             | STMN1                 |
| 1                                          | 25884181                                        | 25906991    | -                      | 6261        |                       |
| protein_coding                             | stathmin 1 [Source:HGNC                         |             | Symbol;Acc:HGNC:6510]  |             | -                     |
| 11379                                      | 11731 10575                                     | 6395 5764   | 6510                   | 88.99980953 |                       |
| 88.78053787                                | 105.0856752                                     | 56.75562214 | 56.58842786            |             |                       |
| 48.34686332                                |                                                 |             |                        |             |                       |
| ENSG00000130635                            | 4477.283517                                     | 4568.34498  | 8067.69205             |             |                       |
| 1070.155455                                | 1485.080868                                     | 853.1500158 | 5704.440183            |             |                       |
| 1136.12878                                 | 2.328174624                                     | 8.97E-10    | 7.86E-08               |             | COL5A1                |
| 9                                          | 134641774                                       | 134844843   | +                      | 11189       |                       |
| protein_coding                             | collagen type V alpha 1 chain [Source:HGNC      |             | Symbol;Acc:HGNC:2209]  |             |                       |
| -                                          | -                                               | 4935 5162   | 6940                   | 1033        | 1301                  |
| 989                                        | 21.59854854                                     | 21.86015149 | 38.59002352            |             |                       |
| 5.130044015                                | 7.147157998                                     | 4.109945244 |                        |             |                       |
| ENSG00000136271                            | 3226.184435                                     | 3955.928334 | 3436.325317            |             |                       |
| 5533.107731                                | 7152.587795                                     | 8111.394943 | 3539.479362            |             |                       |
| 6932.36349                                 | -0.969835747                                    | 9.08E-10    | 7.91E-08               |             | DDX56                 |
| 7                                          | 44565417                                        | 44575051    | -                      | 4068        |                       |
| protein_coding                             | DEAD-box helicase 56 [Source:HGNC               |             | Symbol;Acc:HGNC:18193] |             |                       |
| -                                          | -                                               | 3556 4470   | 2956                   | 5341        | 6266                  |
| 9403                                       | 42.80647749                                     | 52.06585682 | 45.20956539            |             |                       |
| 72.95476744                                | 94.67968547                                     | 107.4772412 |                        |             |                       |
| ENSG00000100242                            | 1432.549275                                     | 1559.36146  | 2145.959586            |             |                       |
| 747.9692533                                | 850.411412                                      | 566.7538527 | 1712.62344             |             |                       |
| 721.711506                                 | 1.247314795                                     | 9.34E-10    | 8.10E-08               |             | SUN2                  |
| 22                                         | 38734725                                        | 38794143    | -                      | 6489        |                       |
| protein_coding                             | Sad1 and UNC84 domain containing 2 [Source:HGNC |             | Symbol;Acc:HGNC:14210] |             |                       |
| -                                          | -                                               | 1579 1762   | 1846                   | 722         | 745                   |
| 657                                        | 11.91606982                                     | 12.86632658 | 17.69949067            |             |                       |
| 6.18260452                                 | 7.057093294                                     | 4.707806601 |                        |             |                       |
| ENSG00000129195                            | 1004.326819                                     | 1106.243941 | 1243.866065            |             |                       |
| 545.9553968                                | 352.7209749                                     | 236.3630984 | 1118.145609            |             |                       |
| 378.34649                                  | 1.564607771                                     | 9.40E-10    | 8.11E-08               |             | PIMREG                |
| 17                                         | 6444415 6451469                                 | +           | 2823                   |             | protein_coding PICALM |
| interacting mitotic regulator [Source:HGNC | Symbol;Acc:HGNC:25483]                          |             |                        |             |                       |

|                                      |                                                        |             |             |             |             |             |                |
|--------------------------------------|--------------------------------------------------------|-------------|-------------|-------------|-------------|-------------|----------------|
| -                                    | 1107                                                   | 1250        | 1070        | 527         | 309         | 274         |                |
| 19.20283836                          | 20.98097062                                            |             | 23.58195173 |             | 10.37317682 |             |                |
| 6.728139097                          | 4.513055796                                            |             |             |             |             |             |                |
| ENSG00000160213                      | 1466.117561                                            |             | 2056.728736 |             | 1806.512024 |             |                |
| 2728.741016                          | 5156.118588                                            |             | 6135.08889  |             | 1776.452774 |             |                |
| 4673.316164                          | -1.395572726                                           |             | 9.47E-10    |             | 8.13E-08    |             | CSTB           |
| 21                                   | 43772511                                               |             | 43776445    |             | -           | 3935        |                |
| protein_coding                       | cystatin B [Source:HGNC Symbol;Acc:HGNC:2482]          |             |             |             |             | -           |                |
| 1616                                 | 2324                                                   | 1554        | 2634        | 4517        | 7112        | 20.11061275 |                |
| 27.98451779                          |                                                        | 24.57045078 |             | 37.19487278 |             | 70.55904825 |                |
| 84.03844917                          |                                                        |             |             |             |             |             |                |
| ENSG00000156970                      | 1414.404256                                            |             | 921.2799544 |             | 1113.667001 |             |                |
| 561.4949242                          | 296.7878753                                            |             | 276.0444945 |             | 1149.783737 |             |                |
| 378.109098                           | 1.605135091                                            |             | 1.02E-09    |             | 8.71E-08    |             | BUB1B          |
| 15                                   | 40161023                                               |             | 40221136    |             | +           | 4476        |                |
| protein_coding                       | BUB1 mitotic checkpoint serine/threonine kinase B      |             |             |             |             |             |                |
| [Source:HGNC Symbol;Acc:HGNC:1149]   |                                                        |             | -           |             | 1559        | 1041        | 958            |
| 542                                  | 260                                                    | 320         | 17.05629587 |             | 11.02013951 |             |                |
| 13.31626036                          | 6.728546411                                            |             | 3.570513096 |             | 3.324228883 |             |                |
| ENSG00000138180                      | 1675.692534                                            |             | 1214.21335  |             | 1562.388777 |             |                |
| 762.4728122                          | 362.9944014                                            |             | 355.4072867 |             | 1484.098221 |             |                |
| 493.6248334                          | 1.588395404                                            |             | 1.04E-09    |             | 8.87E-08    |             | CEP55          |
| 10                                   | 93496632                                               |             | 93529092    |             | +           | 3271        |                |
| protein_coding                       | centrosomal protein 55 [Source:HGNC                    |             |             |             |             |             |                |
| Symbol;Acc:HGNC:1161]                |                                                        |             | -           |             | 1847        | 1372        | 318            |
| 412                                  | 27.65126694                                            |             | 19.87467374 |             | 25.56380942 |             |                |
| 12.50285844                          | 5.975770858                                            |             | 5.856628682 |             |             |             |                |
| ENSG00000135476                      | 1046.060364                                            |             | 840.7453955 |             | 889.3061122 |             |                |
| 380.2004376                          | 357.2869422                                            |             | 171.66517   |             | 925.3706238 |             |                |
| 303.05085                            | 1.613465641                                            |             | 1.09E-09    |             | 9.24E-08    |             | ESPL1          |
| 12                                   | 53268299                                               |             | 53293643    |             | +           | 8890        |                |
| protein_coding                       | "extra spindle pole bodies like 1, separase            |             |             |             |             |             |                |
| [Source:HGNC Symbol;Acc:HGNC:16856]" |                                                        |             | -           |             | 1153        | 950         | 765            |
| 367                                  | 313                                                    | 199         | 6.351206448 |             | 5.063470512 |             |                |
| 5.353853963                          | 2.293909854                                            |             | 2.164162846 |             | 1.040836068 |             |                |
| ENSG00000176945                      | 5.443505796                                            |             | 8.849951531 |             | 0           | 77.69763712 |                |
| 82.18741163                          |                                                        | 137.1596082 |             | 4.764485776 |             | 99.01488565 |                |
| -4.323659086                         |                                                        | 1.12E-09    |             | 9.45E-08    |             | MUC20       | 3              |
| 195720882                            |                                                        | 195741123   |             | +           | 4249        |             | protein_coding |
|                                      | "mucin 20, cell surface associated [Source:HGNC        |             |             |             |             |             |                |
| Symbol;Acc:HGNC:23282]"              |                                                        |             | -           |             | 6           | 10          | 72             |
| 159                                  | 0.069150162                                            |             | 0.111516649 |             | 0           | 75          | 72             |
| 1.041581183                          |                                                        | 1.739968602 |             |             | 0           | 0.980813819 |                |
| ENSG00000111424                      | 304.8363246                                            |             | 196.468924  |             | 189.4861389 |             |                |
| 61.1221412                           | 43.37668947                                            |             | 37.09347895 |             | 230.2637958 |             |                |
| 47.19743654                          | 2.290178512                                            |             | 1.18E-09    |             | 9.86E-08    |             | VDR            |
| 12                                   | 47841537                                               |             | 47943048    |             | -           | 5674        |                |
| protein_coding                       | vitamin D receptor [Source:HGNC Symbol;Acc:HGNC:12679] |             |             |             |             |             |                |
| THR-like                             |                                                        | 336         | 222         | 163         | 59          | 38          | 43             |
| 2.89987067                           |                                                        | 1.853916133 |             | 1.787331542 |             | 0.577796257 |                |

|                        |                                                        |             |             |       |       |                |  |
|------------------------|--------------------------------------------------------|-------------|-------------|-------|-------|----------------|--|
|                        | 0.411662802                                            | 0.3523791   |             |       |       |                |  |
| ENSG00000117906        | 2631.935052                                            | 2045.223799 | 2497.032064 |       |       |                |  |
| 1367.478413            | 1181.444042                                            | 1048.969079 | 2391.396972 |       |       |                |  |
| 1199.297178            | 0.995927139                                            | 1.28E-09    | 1.07E-07    |       |       | RCN2           |  |
| 15                     | 76931619                                               | 76954392    | +           | 10019 |       |                |  |
| protein_coding         | reticulocalbin 2 [Source:HGNC Symbol;Acc:HGNC:9935]    |             |             |       |       |                |  |
| -                      | 2901                                                   | 2311        | 2148        | 1320  | 1035  | 1216           |  |
| 14.17921004            | 10.92954317                                            | 13.33879958 | 7.320851513 |       |       |                |  |
| 6.349848057            | 5.643391978                                            |             |             |       |       |                |  |
| ENSG00000228253        | 992.5325568                                            | 1015.089441 | 666.1077154 |       |       |                |  |
| 1732.139323            | 2115.184358                                            | 2003.910502 | 891.2432376 |       |       |                |  |
| 1950.411394            | -1.128410656                                           | 1.34E-09    | 1.11E-07    |       |       | MT-            |  |
| ATP8                   | MT                                                     | 8366        | 8572        | +     | 207   | protein_coding |  |
| mitochondrially        | encoded ATP synthase membrane subunit 8 [Source:HGNC   |             |             |       |       |                |  |
| Symbol;Acc:HGNC:7415]  | -                                                      | 1094        | 1147        | 573   | 1672  | 1853           |  |
| 2323                   | 258.8067864                                            | 262.5545285 | 172.2229893 |       |       |                |  |
| 448.8259629            | 550.2403492                                            | 521.8069779 |             |       |       |                |  |
| ENSG00000179820        | 3000.278944                                            | 3336.431727 | 3522.349699 |       |       |                |  |
| 5167.410853            | 6641.199456                                            | 5959.973164 | 3286.353457 |       |       |                |  |
| 5922.861158            | -0.849924015                                           | 1.35E-09    | 1.11E-07    |       |       | MYADM          |  |
| 19                     | 53866223                                               | 53876437    | +           | 3675  |       |                |  |
| protein_coding         | myeloid associated differentiation marker [Source:HGNC |             |             |       |       |                |  |
| Symbol;Acc:HGNC:7544]  | -                                                      | 3307        | 3770        | 3030  | 4988  | 5818           |  |
| 6909                   | 44.06619329                                            | 48.60830168 | 51.29701945 |       |       |                |  |
| 75.41906518            | 97.31140291                                            | 87.41558482 |             |       |       |                |  |
| ENSG00000150991        | 10653.84809                                            | 11516.44193 | 11720.24081 |       |       |                |  |
| 16622.1145             | 22365.24939                                            | 21481.43751 | 11296.84361 |       |       |                |  |
| 20156.26713            | -0.835336924                                           | 1.36E-09    | 1.12E-07    |       |       | UBC            |  |
| 12                     | 124911604                                              | 124917368   | -           | 3898  |       |                |  |
| protein_coding         | ubiquitin C [Source:HGNC Symbol;Acc:HGNC:12468] -      |             |             |       |       |                |  |
| 11743                  | 13013                                                  | 10082       | 16045       | 19593 | 24902 | 147.5250973    |  |
| 158.1838115            | 160.9206229                                            | 228.7230482 | 308.9629932 |       |       |                |  |
| 297.0457972            |                                                        |             |             |       |       |                |  |
| ENSG00000244486        | 1410.775252                                            | 1497.411799 | 1875.099031 |       |       |                |  |
| 675.4514587            | 862.9678221                                            | 731.5179104 | 1594.428694 |       |       |                |  |
| 756.6457304            | 1.075291146                                            | 1.39E-09    | 1.14E-07    |       |       | SCARF2         |  |
| 22                     | 20424815                                               | 20437826    | -           | 3341  |       |                |  |
| protein_coding         | scavenger receptor class F member 2 [Source:HGNC       |             |             |       |       |                |  |
| Symbol;Acc:HGNC:19869] | -                                                      | 1555        | 1692        | 1613  | 652   | 756            |  |
| 848                    | 22.79200866                                            | 23.99663379 | 30.03756602 |       |       |                |  |
| 10.84384157            | 13.90889665                                            | 11.80185827 |             |       |       |                |  |
| ENSG00000120802        | 5286.551379                                            | 4196.647016 | 4713.90364  |       |       |                |  |
| 2904.85566             | 2424.528643                                            | 2254.938464 | 4732.367345 |       |       |                |  |
| 2528.107589            | 0.904664532                                            | 1.41E-09    | 1.15E-07    |       |       | TMPO           |  |
| 12                     | 98515512                                               | 98550379    | +           | 8593  |       |                |  |
| protein_coding         | thymopoietin [Source:HGNC Symbol;Acc:HGNC:11875]       |             |             |       |       |                |  |
| -                      | 5827                                                   | 4742        | 4055        | 2804  | 2124  | 2614           |  |
| 33.20694248            | 26.14828312                                            | 29.35978652 | 18.13198041 |       |       |                |  |
| 15.19347308            | 14.14463645                                            |             |             |       |       |                |  |
| ENSG00000132002        | 4173.354444                                            | 4894.023197 | 4553.479793 |       |       |                |  |

|                                                |                                                      |             |             |             |             |
|------------------------------------------------|------------------------------------------------------|-------------|-------------|-------------|-------------|
| 6999.003152                                    | 8346.588248                                          | 8450.412088 | 4540.285811 |             |             |
| 7932.001162                                    | -0.804921451                                         | 1.42E-09    | 1.15E-07    |             | DNAJB1      |
| 19                                             | 14514770                                             | 14529770    | -           | 3672        |             |
| protein_coding                                 | DnaJ heat shock protein family (Hsp40) member B1     |             |             |             |             |
| [Source:HGNC Symbol;Acc:HGNC:5270]             | -                                                    | 4600        | 5530        | 3917        |             |
| 6756                                           | 7312                                                 | 9796        | 61.34565992 | 71.3590237  |             |
| 66.36784951                                    | 102.2348613                                          | 122.3998457 | 124.0443884 |             |             |
| ENSG00000179750                                | 361.9931354                                          | 338.0681485 | 559.1584836 |             |             |
| 149.1794633                                    | 54.79160775                                          | 70.73640171 | 419.7399225 |             |             |
| 91.56915758                                    | 2.195347105                                          | 1.49E-09    | 1.20E-07    |             |             |
| APOBEC3B                                       | 22                                                   | 38982347    | 38992804    | +           | 1896        |
| protein_coding                                 | apolipoprotein B mRNA editing enzyme catalytic       |             |             |             |             |
| subunit 3B [Source:HGNC Symbol;Acc:HGNC:17352] | -                                                    | 399         | 382         |             |             |
| 481                                            | 144                                                  | 48          | 82          | 10.30536186 | 9.546660332 |
| 15.78387344                                    | 4.2202308                                            | 1.556145727 | 2.010974379 |             |             |
| ENSG00000035499                                | 616.9306569                                          | 543.387024  | 531.258684  |             |             |
| 247.5964703                                    | 162.0918396                                          | 216.5224004 | 563.8587883 |             |             |
| 208.7369034                                    | 1.432324551                                          | 1.50E-09    | 1.21E-07    |             |             |
| DEPDC1B 5                                      | 60596912                                             | 60700190    | -           | 3806        |             |
| protein_coding                                 | DEP domain containing 1B [Source:HGNC                |             |             |             |             |
| Symbol;Acc:HGNC:24902]                         | -                                                    | 680         | 614         | 457         | 239         |
| 251                                            | 8.749209429                                          | 7.644094159 | 7.470579001 |             | 142         |
| 3.4893229                                      | 2.293331945                                          | 3.06645048  |             |             |             |
| ENSG00000110237                                | 1842.626712                                          | 1531.92661  | 1625.163327 |             |             |
| 938.5874564                                    | 713.4323926                                          | 582.2813556 | 1666.572216 |             |             |
| 744.7670682                                    | 1.162874733                                          | 1.53E-09    | 1.22E-07    |             |             |
| ARHGEF17                                       | 11                                                   | 73308289    | 73369388    | +           | 9908        |
| protein_coding                                 | Rho guanine nucleotide exchange factor 17            |             |             |             |             |
| [Source:HGNC Symbol;Acc:HGNC:21726]            | -                                                    | 2031        | 1731        | 1398        |             |
| 906                                            | 625                                                  | 675         | 10.03812522 | 8.278230424 |             |
| 8.778655777                                    | 5.081059065                                          | 3.877406907 | 3.167734635 |             |             |
| ENSG00000163535                                | 1402.609993                                          | 1011.54946  | 1118.316967 |             |             |
| 570.8186407                                    | 422.3519764                                          | 274.3192164 | 1177.49214  |             |             |
| 422.4966112                                    | 1.48038074                                           | 1.54E-09    | 1.22E-07    |             | SG02        |
| 2                                              | 200510008                                            | 200583782   | +           | 6022        |             |
| protein_coding                                 | shugoshin 2 [Source:HGNC Symbol;Acc:HGNC:30812] -    |             |             |             |             |
| 1546                                           | 1143                                                 | 962         | 551         | 370         | 318         |
| 8.993565874                                    | 9.938965143                                          | 5.084203103 | 3.776663866 |             |             |
| 2.455372497                                    |                                                      |             |             |             |             |
| ENSG00000162490                                | 160.583421                                           | 219.478798  | 549.8585504 |             |             |
| 66.30198367                                    | 19.40536108                                          | 37.09347895 | 309.9735898 |             |             |
| 40.9336079                                     | 2.916295467                                          | 1.55E-09    | 1.23E-07    |             | DRAXIN      |
| 1                                              | 11691729                                             | 11725857    | +           | 7346        |             |
| protein_coding                                 | dorsal inhibitory axon guidance protein [Source:HGNC |             |             |             |             |
| Symbol;Acc:HGNC:25054]                         | -                                                    | 177         | 248         | 473         | 64          |
| 43                                             | 1.179915825                                          | 1.599658204 | 4.006056437 |             | 17          |
| 0.4841067                                      | 0.142247734                                          | 0.272175199 |             |             |             |
| ENSG00000196154                                | 7608.206601                                          | 8887.121328 | 9032.56012  |             |             |
| 5165.338916                                    | 4045.447039                                          | 2987.319014 | 8509.296016 |             |             |
| 4066.034989                                    | 1.065618791                                          | 1.59E-09    | 1.25E-07    |             | S100A4      |

|                        |                                        |              |             |      |           |
|------------------------|----------------------------------------|--------------|-------------|------|-----------|
| 1                      | 153543613                              | 153550136    | -           | 1025 |           |
| protein_coding         | S100 calcium binding protein A4        | [Source:HGNC |             |      |           |
| Symbol;Acc:HGNC:10494] | -                                      | 8386 10042   | 7770        | 4986 | 3544      |
| 3463                   | 400.644953                             | 464.2188726  | 471.6327992 |      |           |
| 270.2965188            | 212.5285152                            | 157.0940167  |             |      |           |
| ENSG00000163430        | 5294.716637                            | 4736.494059  | 7051.674348 |      |           |
| 3072.682556            | 2934.77549                             | 2215.257068  | 5694.295015 |      |           |
| 2740.905038            | 1.05493922                             | 1.65E-09     | 1.29E-07    |      | FSTL1     |
| 3                      | 120392293                              | 120451253    | -           | 8727 |           |
| protein_coding         | follistatin like 1                     | [Source:HGNC |             |      |           |
| Symbol;Acc:HGNC:3972]  | -                                      | 5836 5352    | 6066        | 2966 | 2571 2568 |
| 32.74756334            | 29.05879289                            | 43.24583397  | 18.88505328 |      |           |
| 18.1085827             | 13.68236153                            |              |             |      |           |
| ENSG00000168615        | 4655.104706                            | 3833.799003  | 5034.751336 |      |           |
| 2705.949709            | 1800.132613                            | 1558.788755  | 4507.885015 |      |           |
| 2021.623692            | 1.157053574                            | 1.75E-09     | 1.37E-07    |      | ADAM9     |
| 8                      | 38996869                               | 39105144     | +           | 6913 |           |
| protein_coding         | ADAM metalloproteinase domain 9        | [Source:HGNC |             |      |           |
| Symbol;Acc:HGNC:216]   | -                                      | 5131 4332    | 4331        | 2612 | 1577      |
| 1807                   | 36.34662927                            | 29.69260712  | 38.97880078 |      |           |
| 20.99513441            | 14.02208181                            | 12.15409464  |             |      |           |
| ENSG00000164308        | 1130.434704                            | 823.0454924  | 1195.041416 |      |           |
| 503.4806885            | 442.8988293                            | 420.9678541  | 1049.507204 |      |           |
| 455.7824573            | 1.203014878                            | 1.76E-09     | 1.37E-07    |      | ERAP2     |
| 5                      | 96875939                               | 96919716     | +           | 7422 |           |
| protein_coding         | endoplasmic reticulum aminopeptidase 2 | [Source:HGNC |             |      |           |
| Symbol;Acc:HGNC:29499] | -                                      | 1246 930     | 1028        | 486  | 388       |
| 488                    | 8.221021346                            | 5.937292424  | 8.617454743 |      |           |
| 3.638541753            | 3.21335077                             | 3.057242513  |             |      |           |
| ENSG00000146670        | 2565.705732                            | 2388.601918  | 2510.981964 |      |           |
| 1485.578822            | 1135.784369                            | 1365.557609  | 2488.429871 |      |           |
| 1328.9736              | 0.904447263                            | 1.97E-09     | 1.53E-07    |      | CDCA5     |
| 11                     | 65066300                               | 65084164     | -           | 3925 |           |
| protein_coding         | cell division cycle associated 5       | [Source:HGNC |             |      |           |
| Symbol;Acc:HGNC:14626] | -                                      | 2828 2699    | 2160        | 1434 | 995       |
| 1583                   | 35.28323746                            | 32.58289466  | 34.23898933 |      |           |
| 20.30119178            | 15.58227196                            | 18.75306556  |             |      |           |
| ENSG00000112655        | 2582.9435                              | 2871.809272  | 3459.57515  |      |           |
| 1538.413215            | 1596.947068                            | 1632.113074  | 2971.442641 |      |           |
| 1589.157785            | 0.902397625                            | 2.03E-09     | 1.57E-07    |      | PTK7      |
| 6                      | 43076268                               | 43161719     | +           | 9024 |           |
| protein_coding         | protein tyrosine kinase 7 (inactive)   | [Source:HGNC |             |      |           |
| Symbol;Acc:HGNC:9618]  | -                                      | 2847 3245    | 2976        | 1485 | 1399      |
| 1892                   | 15.44959375                            | 17.03891967  | 20.51826747 |      |           |
| 9.144067234            | 9.529409458                            | 9.748842713  |             |      |           |
| ENSG00000131043        | 1586.781939                            | 1803.620122  | 1691.425351 |      |           |
| 2605.460765            | 3705.282474                            | 3885.32626   | 1693.942471 |      |           |
| 3398.689833            | -1.004676657                           | 2.04E-09     | 1.57E-07    |      | AAR2      |
| 20                     | 36236459                               | 36270918     | +           | 3101 |           |
| protein_coding         | AAR2 splicing factor homolog           | [Source:HGNC |             |      |           |

|                                                      |                                                       |             |      |             |      |                |
|------------------------------------------------------|-------------------------------------------------------|-------------|------|-------------|------|----------------|
| Symbol;Acc:HGNC:15886]                               | -                                                     | 1749        | 2038 | 1455        | 2515 | 3246           |
| 4504                                                 | 27.61955816                                           | 31.14073467 |      | 29.19228388 |      |                |
| 45.06592263                                          | 64.34193379                                           | 67.53480244 |      |             |      |                |
| ENSG00000146918                                      | 2184.660326                                           | 1685.915767 |      | 2106.43487  |      |                |
| 1135.42147                                           | 643.8013911                                           | 644.3913668 |      | 1992.336987 |      |                |
| 807.8714094                                          | 1.30237454                                            | 2.35E-09    |      | 1.80E-07    |      | NCAPG2         |
| 7                                                    | 158631311                                             | 158704829   |      | -           | 6988 |                |
| protein_coding                                       | non-SMC condensin II complex subunit G2 [Source:HGNC  |             |      |             |      |                |
| Symbol;Acc:HGNC:21904]                               | -                                                     | 2408        | 1905 | 1812        | 1096 | 564            |
| 747                                                  | 16.87455271                                           | 12.91720418 |      | 16.13288892 |      |                |
| 8.715046356                                          | 4.961049586                                           | 4.970484498 |      |             |      |                |
| ENSG00000163808                                      | 1437.08553                                            | 943.4048332 |      | 1095.067134 |      |                |
| 571.8546092                                          | 276.2410224                                           | 376.9732628 |      | 1158.519166 |      |                |
| 408.3562981                                          | 1.503956758                                           | 2.63E-09    |      | 2.01E-07    |      | KIF15          |
| 3                                                    | 44761717                                              | 44873376    |      | +           | 5285 |                |
| protein_coding                                       | kinesin family member 15 [Source:HGNC                 |             |      |             |      |                |
| Symbol;Acc:HGNC:17273]                               | -                                                     | 1584        | 1066 | 942         | 552  | 242            |
| 437                                                  | 14.67705322                                           | 9.557375599 |      | 11.08952024 |      |                |
| 5.803715696                                          | 2.814606813                                           | 3.844744315 |      |             |      |                |
| ENSG00000124172                                      | 2348.872751                                           | 3421.391262 |      | 3397.963093 |      |                |
| 1628.542474                                          | 1220.254764                                           | 1526.87111  |      | 3056.075702 |      |                |
| 1458.556116                                          | 1.066604559                                           | 2.67E-09    |      | 2.02E-07    |      |                |
| ATP5F1E 20                                           | 59025467                                              | 59032382    |      | -           | 5126 |                |
| protein_coding                                       | ATP synthase F1 subunit epsilon [Source:HGNC          |             |      |             |      |                |
| Symbol;Acc:HGNC:838]                                 | -                                                     | 2589        | 3866 | 2923        | 1572 | 1069           |
| 1770                                                 | 24.73330381                                           | 35.73630851 |      | 35.47783096 |      |                |
| 17.04064321                                          | 12.8187732                                            | 16.05556831 |      |             |      |                |
| ENSG00000110811                                      | 1136.78546                                            | 1107.128937 |      | 1246.191049 |      |                |
| 635.0486874                                          | 543.3501102                                           | 571.929687  |      | 1163.368482 |      |                |
| 583.4428282                                          | 0.995096784                                           | 2.91E-09    |      | 2.20E-07    |      | P3H3           |
| 12                                                   | 6828410                                               | 6839851     | +    | 4601        |      | protein_coding |
| 3-hydroxylase 3 [Source:HGNC                         | Symbol;Acc:HGNC:19318]                                | -           |      |             |      | prolyl         |
| 1251                                                 | 1072                                                  | 613         |      | 476         | 663  | 1253           |
| 12.88343045                                          | 14.49604067                                           | 7.403213684 |      | 6.35919408  |      |                |
| 6.700270147                                          |                                                       |             |      |             |      |                |
| ENSG00000179403                                      | 1181.240758                                           | 959.334746  |      | 1053.217435 |      |                |
| 508.660531                                           | 555.9065203                                           | 472.7261968 |      | 1064.597646 |      |                |
| 512.4310827                                          | 1.055789413                                           | 3.01E-09    |      | 2.27E-07    |      | VWA1           |
| 1                                                    | 1434861                                               | 1442882     | +    | 5065        |      | protein_coding |
| Willebrand factor A domain containing 1 [Source:HGNC |                                                       |             |      |             |      | von            |
| Symbol;Acc:HGNC:30910]                               | -                                                     | 1302        | 1084 | 906         | 491  | 487            |
| 548                                                  | 12.58810098                                           | 10.1408947  |      | 11.12898596 |      |                |
| 5.386592054                                          | 5.910127794                                           | 5.030742946 |      |             |      |                |
| ENSG00000122691                                      | 662.2932052                                           | 790.3006717 |      | 778.8694054 |      |                |
| 257.9561552                                          | 320.7592037                                           | 359.7204819 |      | 743.8210941 |      |                |
| 312.8119469                                          | 1.248334079                                           | 3.03E-09    |      | 2.27E-07    |      | TWIST1         |
| 7                                                    | 19020991                                              | 19117672    |      | -           | 2033 |                |
| protein_coding                                       | twist family bHLH transcription factor 1 [Source:HGNC |             |      |             |      |                |
| Symbol;Acc:HGNC:12428]                               | bHLH                                                  | 730         | 893  | 670         | 249  | 281            |
| 417                                                  | 17.58385788                                           | 20.81327973 |      | 20.50426805 |      |                |

|                                     |                                                         |                                          |             |             |      |        |
|-------------------------------------|---------------------------------------------------------|------------------------------------------|-------------|-------------|------|--------|
| 6.805718976                         | 8.496035169                                             | 9.537393347                              |             |             |      |        |
| ENSG00000268858                     | 256.7520234                                             | 323.0232309                              | 277.8355043 |             |      |        |
| 556.3150818                         | 762.5165412                                             | 1022.227269                              | 285.8702529 |             |      |        |
| 780.3529639                         | -1.449208334                                            | 3.21E-09                                 | 2.39E-07    |             |      |        |
| AL118506.1                          | 20                                                      | 63861212                                 | 63864293    | -           |      | 3082   |
| antisense                           |                                                         | "novel transcript, antisense to ABHD16B" |             |             |      |        |
| -                                   | 283                                                     | 365                                      | 239         | 537         | 668  | 1185   |
| 4.496581659                         | 5.611599539                                             | 4.824719987                              | 9.681746227 |             |      |        |
| 13.32266747                         | 17.87790948                                             |                                          |             |             |      |        |
| ENSG00000164109                     | 2280.828928                                             | 2131.068329                              | 2286.621075 |             |      |        |
| 1357.118728                         | 888.0806423                                             | 820.3697321                              | 2232.839444 |             |      |        |
| 1021.856368                         | 1.127993978                                             | 3.25E-09                                 | 2.42E-07    |             |      | MAD2L1 |
| 4                                   | 120055608                                               | 120067074                                | -           | 5748        |      |        |
| protein_coding                      | mitotic arrest deficient 2 like 1 [Source:HGNC          |                                          |             |             |      |        |
| Symbol;Acc:HGNC:6763]               | -                                                       | 2514                                     | 2408        | 1967        | 1310 | 778    |
| 951                                 | 21.41791533                                             | 19.85025837                              | 21.29092093 |             |      |        |
| 12.66387397                         | 8.319748493                                             | 7.692983051                              |             |             |      |        |
| ENSG00000177283                     | 1949.682326                                             | 2596.575779                              | 2549.344188 |             |      |        |
| 4130.406389                         | 4294.292258                                             | 4570.261662                              | 2365.200764 |             |      |        |
| 4331.653436                         | -0.873256029                                            | 3.45E-09                                 | 2.55E-07    |             |      | FZD8   |
| 10                                  | 35638249                                                | 35642278                                 | -           | 4030        |      |        |
| protein_coding                      | frizzled class receptor 8 [Source:HGNC                  |                                          |             |             |      |        |
| Symbol;Acc:HGNC:4046]               | -                                                       | 2149                                     | 2934        | 2193        | 3987 | 3762   |
| 5298                                | 26.11319747                                             | 34.49701394                              | 33.85637311 |             |      |        |
| 54.97348039                         | 57.38007417                                             | 61.1276818                               |             |             |      |        |
| ENSG00000136108                     | 3882.126883                                             | 2794.814694                              | 3743.223113 |             |      |        |
| 1944.512865                         | 1761.321891                                             | 1349.167467                              | 3473.38823  |             |      |        |
| 1685.000741                         | 1.043941045                                             | 3.50E-09                                 | 2.58E-07    |             |      | CKAP2  |
| 13                                  | 52455429                                                | 52476628                                 | +           | 4547        |      |        |
| protein_coding                      | cytoskeleton associated protein 2 [Source:HGNC          |                                          |             |             |      |        |
| Symbol;Acc:HGNC:1990]               | -                                                       | 4279                                     | 3158        | 3220        | 1877 | 1543   |
| 1564                                | 46.08355941                                             | 32.90891866                              | 44.05931736 |             |      |        |
| 22.93777889                         | 20.85875255                                             | 15.99347415                              |             |             |      |        |
| ENSG00000154734                     | 3392.211362                                             | 3523.165705                              | 2004.135604 |             |      |        |
| 6803.205106                         | 5575.046089                                             | 7060.700586                              | 2973.17089  |             |      |        |
| 6479.650593                         | -1.123462763                                            | 3.69E-09                                 | 2.71E-07    |             |      |        |
| ADAMTS1 21                          | 26835747                                                | 26845409                                 | -           | 7063        |      |        |
| protein_coding                      | ADAM metalloproteinase with thrombospondin type 1 motif |                                          |             |             |      |        |
| 1 [Source:HGNC Symbol;Acc:HGNC:217] | -                                                       |                                          | 3739        | 3981        | 1724 |        |
| 6567                                | 4884                                                    | 8185                                     | 25.92357796 | 26.70726478 |      |        |
| 15.18640235                         | 51.66421722                                             | 42.5043921                               | 53.8840829  |             |      |        |
| ENSG00000124731                     | 369.2511432                                             | 461.9674699                              | 267.3730795 |             |      |        |
| 842.2423864                         | 849.2699202                                             | 1142.134096                              | 366.1972309 |             |      |        |
| 944.5488008                         | -1.365173602                                            | 3.89E-09                                 | 2.85E-07    |             |      | TREM1  |
| 6                                   | 41267926                                                | 41286719                                 | -           | 4329        |      |        |
| protein_coding                      | triggering receptor expressed on myeloid cells 1        |                                          |             |             |      |        |
| [Source:HGNC Symbol;Acc:HGNC:17760] | -                                                       |                                          | 407         | 522         | 230  |        |
| 813                                 | 744                                                     | 1324                                     | 4.604002035 | 5.713593753 |      |        |
| 3.30557562                          | 10.43554183                                             | 10.56410502                              | 14.22104195 |             |      |        |
| ENSG00000186141                     | 1837.183206                                             | 1994.779075                              | 1914.623747 |             |      |        |

|                                 |                                                       |             |                |           |
|---------------------------------|-------------------------------------------------------|-------------|----------------|-----------|
| 2980.48136                      | 3709.848442                                           | 3485.924382 | 1915.528676    |           |
| 3392.084728                     | -0.824360196                                          | 3.92E-09    | 2.85E-07       | POLR3C    |
| 1                               | 145824088                                             | 145842505   | + 2793         |           |
| protein_coding                  | RNA polymerase III subunit C [Source:HGNC             |             |                |           |
| Symbol;Acc:HGNC:30076]          | -                                                     | 2025 2254   | 1647 2877      | 3250      |
| 4041                            | 35.50444886                                           | 38.2392545  | 36.68846232    |           |
| 57.23754129                     | 71.52531605                                           | 67.27426055 |                |           |
| ENSG00000134369                 | 3994.626003                                           | 3085.093104 | 5034.751336    |           |
| 2147.56269                      | 1985.054289                                           | 1616.585571 | 4038.156814    |           |
| 1916.40085                      | 1.075278793                                           | 3.93E-09    | 2.85E-07       | NAV1      |
| 1                               | 201622885                                             | 201826969   | + 22453        |           |
| protein_coding                  | neuron navigator 1 [Source:HGNC                       |             |                |           |
| Symbol;Acc:HGNC:15989]          | -                                                     | 4403 3486   | 4331 2073      | 1739 1874 |
| 9.602912964                     | 7.356639035                                           | 12.00108893 | 5.130231576    |           |
| 4.760719194                     | 3.880844382                                           |             |                |           |
| ENSG0000010292                  | 4866.494182                                           | 3595.735307 | 4933.614562    |           |
| 2687.302276                     | 1811.547531                                           | 1635.56363  | 4465.28135     |           |
| 2044.804479                     | 1.126862115                                           | 4.02E-09    | 2.91E-07       | NCAPD2    |
| 12                              | 6493356 6531955                                       | + 6487      | protein_coding | non-      |
| SMC condensin I complex subunit | D2 [Source:HGNC                                       |             |                |           |
| Symbol;Acc:HGNC:24305]          | -                                                     | 5364 4063   | 4244 2594      | 1587      |
| 1896                            | 40.4924034                                            | 29.67764019 | 40.70411568    |           |
| 22.21969624                     | 15.03766442                                           | 13.59018764 |                |           |
| ENSG00000103043                 | 1794.542411                                           | 1801.850132 | 1664.688043    |           |
| 2821.97818                      | 3031.802296                                           | 3247.836005 | 1753.693528    |           |
| 3033.87216                      | -0.790633305                                          | 4.15E-09    | 2.98E-07       | VAC14     |
| 16                              | 70687439                                              | 70801161    | - 8276         |           |
| protein_coding                  | "Vac14, PIKFYVE complex component [Source:HGNC        |             |                |           |
| Symbol;Acc:HGNC:25507]"         | -                                                     | 1978 2036   | 1432 2724      | 2656      |
| 3765                            | 11.70400474                                           | 11.65691776 | 10.76538045    |           |
| 18.28936659                     | 19.72672312                                           | 21.15317278 |                |           |
| ENSG00000169499                 | 1310.070395                                           | 1018.629421 | 1338.027889    |           |
| 573.9265462                     | 641.5184074                                           | 488.2536996 | 1222.242568    |           |
| 567.8995511                     | 1.106624741                                           | 4.18E-09    | 3.00E-07       |           |
| PLEKHA2 8                       | 38901235                                              | 38973909    | + 6325         |           |
| protein_coding                  | pleckstrin homology domain containing A2 [Source:HGNC |             |                |           |
| Symbol;Acc:HGNC:14336]          | -                                                     | 1444 1151   | 1151 554       | 562       |
| 566                             | 11.17983379                                           | 8.622659461 | 11.32196063    |           |
| 4.866999241                     | 5.461640948                                           | 4.160896561 |                |           |
| ENSG00000154096                 | 513.5040467                                           | 492.0573051 | 594.0332331    |           |
| 222.7332264                     | 73.055477                                             | 120.7694663 | 533.198195     |           |
| 138.8527232                     | 1.939622437                                           | 4.28E-09    | 3.06E-07       | THY1      |
| 11                              | 119417378                                             | 119424985   | - 5925         |           |
| protein_coding                  | Thy-1 cell surface antigen [Source:HGNC               |             |                |           |
| Symbol;Acc:HGNC:11801]          | -                                                     | 566 556     | 511 215        | 64        |
| 140                             | 4.677962759                                           | 4.446444519 | 5.365860676    |           |
| 2.016332493                     | 0.66395551                                            | 1.098678685 |                |           |
| ENSG00000172985                 | 451.8109811                                           | 420.3726977 | 403.3846025    |           |
| 174.0427071                     | 151.8184131                                           | 157.8629453 | 425.1894271    |           |
| 161.2413552                     | 1.399091552                                           | 4.38E-09    | 3.11E-07       | SH3RF3    |



|                        |                                                   |             |       |             |                  |
|------------------------|---------------------------------------------------|-------------|-------|-------------|------------------|
| 2                      | 109129348                                         | 109504632   | +     | 5803        |                  |
| protein_coding         | SH3 domain containing ring finger 3 [Source:HGNC  |             |       |             |                  |
| Symbol;Acc:HGNC:24699] | -                                                 | 498         | 475   | 347         | 168 133          |
| 183                    | 4.202478069                                       | 3.878532901 |       | 3.720349587 |                  |
| 1.608676638            | 1.408790553                                       | 1.46632263  |       |             |                  |
| ENSG00000196576        | 3051.99225                                        | 3070.048186 |       | 3960.609051 |                  |
| 1939.333022            | 1732.784595                                       | 1338.815798 |       | 3360.883162 |                  |
| 1670.311139            | 1.008917541                                       | 4.83E-09    |       | 3.42E-07    | PLXNB2           |
| 22                     | 50274979                                          | 50307627    | -     | 7257        |                  |
| protein_coding         | plexin B2 [Source:HGNC Symbol;Acc:HGNC:9104]      |             |       |             |                  |
| 3364                   | 3469                                              | 3407        | 1872  | 1518        | 1552 22.70008836 |
| 22.65028222            | 29.20934761                                       | 14.33378101 |       | 12.85766211 |                  |
| 9.944102953            |                                                   |             |       |             |                  |
| ENSG00000001617        | 811.0823636                                       | 741.6259383 |       | 1004.392786 |                  |
| 373.9846267            | 399.5221399                                       | 260.5169917 |       | 852.3670291 |                  |
| 344.6745861            | 1.307712812                                       | 4.86E-09    |       | 3.42E-07    | SEMA3F           |
| 3                      | 50155045                                          | 50189075    | +     | 4826        |                  |
| protein_coding         | semaphorin 3F [Source:HGNC Symbol;Acc:HGNC:10728] |             |       |             |                  |
| -                      | 894                                               | 838         | 864   | 361         | 350 302          |
| 9.071495402            | 8.227788926                                       | 11.13866831 |       | 4.156539653 |                  |
| 4.457877057            | 2.909716277                                       |             |       |             |                  |
| ENSG00000196262        | 25551.81621                                       | 28013.63658 |       | 32812.48931 |                  |
| 18651.57678            | 15528.85483                                       | 14122.26381 |       | 28792.64736 |                  |
| 16100.89847            | 0.838553601                                       | 5.46E-09    |       | 3.83E-07    | PPIA             |
| 7                      | 44796680                                          | 44824564    | +     | 4432        |                  |
| protein_coding         | peptidylprolyl isomerase A [Source:HGNC           |             |       |             |                  |
| Symbol;Acc:HGNC:9253]  | -                                                 | 28164       | 31654 | 28226       | 18004 13604      |
| 16371                  | 311.1883053                                       | 338.419428  |       | 396.2382821 |                  |
| 225.7258495            | 188.6749449                                       | 171.7538476 |       |             |                  |
| ENSG00000076706        | 2741.712419                                       | 2490.376361 |       | 2493.544589 |                  |
| 1544.629026            | 946.2967256                                       | 767.7487503 |       | 2575.211123 |                  |
| 1086.224834            | 1.245908365                                       | 5.79E-09    |       | 4.05E-07    | MCAM             |
| 11                     | 119308529                                         | 119321521   | -     | 7422        |                  |
| protein_coding         | melanoma cell adhesion molecule [Source:HGNC      |             |       |             |                  |
| Symbol;Acc:HGNC:6934]  | -                                                 | 3022        | 2814  | 2145        | 1491 829         |
| 890                    | 19.93894583                                       | 17.96509772 |       | 17.98097317 |                  |
| 11.16268674            | 6.865638629                                       | 5.575708682 |       |             |                  |
| ENSG00000145431        | 2044.036426                                       | 2111.598435 |       | 2183.159318 |                  |
| 1282.528997            | 1184.868518                                       | 1109.353812 |       | 2112.931393 |                  |
| 1192.250442            | 0.825738267                                       | 6.48E-09    |       | 4.50E-07    | PDGFC            |
| 4                      | 156760454                                         | 156971394   | -     | 5593        |                  |
| protein_coding         | platelet derived growth factor C [Source:HGNC     |             |       |             |                  |
| Symbol;Acc:HGNC:8801]  | -                                                 | 2253        | 2386  | 1878        | 1238 1038        |
| 1286                   | 19.72627376                                       | 20.21399067 |       | 20.89092237 |                  |
| 12.29951167            | 11.40774735                                       | 10.69121756 |       |             |                  |
| ENSG00000148082        | 583.3623711                                       | 706.2261322 |       | 478.9465598 |                  |
| 1210.011202            | 1256.782503                                       | 1251.689255 |       | 589.5116877 |                  |
| 1239.49432             | -1.070465747                                      | 6.49E-09    |       | 4.50E-07    | SHC3             |
| 9                      | 89005771                                          | 89178767    | -     | 9929        |                  |
| protein_coding         | SHC adaptor protein 3 [Source:HGNC                |             |       |             |                  |

|                                    |                                                        |             |             |             |       |             |
|------------------------------------|--------------------------------------------------------|-------------|-------------|-------------|-------|-------------|
| Symbol;Acc:HGNC:18181]             | -                                                      | 643         | 798         | 412         | 1168  | 1101        |
| 1451                               | 3.171276766                                            | 3.808235713 |             | 2.581657064 |       |             |
| 6.536561862                        | 6.815993514                                            | 6.795054117 |             |             |       |             |
| ENSG00000105447                    | 4168.818189                                            | 4954.202867 |             | 4097.783066 |       |             |
| 6792.845421                        | 7910.538369                                            | 9257.842234 |             | 4406.934707 |       |             |
| 7987.075341                        | -0.857859106                                           | 6.86E-09    |             | 4.74E-07    |       | GRWD1       |
| 19                                 | 48445773                                               | 48457022    |             | +           | 5763  |             |
| protein_coding                     | glutamate rich WD repeat containing 1 [Source:HGNC     |             |             |             |       |             |
| Symbol;Acc:HGNC:21270]             | -                                                      | 4595        | 5598        | 3525        | 6557  | 6930        |
| 10732                              | 39.04501371                                            | 46.02679297 |             | 38.05549264 |       |             |
| 63.22205492                        | 73.91489686                                            | 86.58906748 |             |             |       |             |
| ENSG00000123384                    | 2758.042937                                            | 1665.560878 |             | 3638.598864 |       |             |
| 1281.493028                        | 971.4095458                                            | 693.5617924 |             | 2687.400893 |       |             |
| 982.1547888                        | 1.452331725                                            | 6.89E-09    |             | 4.74E-07    |       | LRP1        |
| 12                                 | 57128493                                               | 57213351    |             | +           | 20839 |             |
| protein_coding                     | LDL receptor related protein 1 [Source:HGNC            |             |             |             |       |             |
| Symbol;Acc:HGNC:6692]              | -                                                      | 3040        | 1882        | 3130        | 1237  | 851         |
| 804                                | 7.143735932                                            | 4.279265035 |             | 9.344892494 |       |             |
| 3.298411748                        | 2.510152145                                            | 1.793949412 |             |             |       |             |
| ENSG00000204388                    | 2223.672118                                            | 3297.491941 |             | 2181.996827 |       |             |
| 4440.160969                        | 5254.286885                                            | 6488.770899 |             | 2567.720295 |       |             |
| 5394.406251                        | -1.07077696                                            | 7.40E-09    |             | 5.07E-07    |       | HSPA1B      |
| 6                                  | 31827735                                               | 31830255    |             | +           | 2521  |             |
| protein_coding                     | heat shock protein family A (Hsp70) member 1B          |             |             |             |       |             |
| [Source:HGNC Symbol;Acc:HGNC:5233] | -                                                      |             |             | 2451        | 3726  | 1877        |
| 4286                               | 4603                                                   | 7522        | 47.61010608 | 70.03198653 |       |             |
| 46.32317022                        | 94.46944516                                            |             | 112.2316866 | 138.7367452 |       |             |
| ENSG00000134243                    | 1927.001052                                            |             | 1547.856523 | 1792.562124 |       |             |
| 999.7095976                        | 583.3023242                                            |             | 789.3147264 | 1755.806566 |       |             |
| 790.7755494                        | 1.150145667                                            |             | 7.76E-09    | 5.30E-07    |       | SORT1       |
| 1                                  | 109309568                                              |             | 109397951   | -           | 9160  |             |
| protein_coding                     | sortilin 1 [Source:HGNC Symbol;Acc:HGNC:11186]         |             |             |             |       |             |
| 2124                               | 1749                                                   | 1542        | 965         | 511         | 915   | 11.35501526 |
|                                    | 9.047337191                                            | 10.47359429 |             | 5.853880914 |       | 3.429041859 |
|                                    | 4.644688987                                            |             |             |             |       |             |
| ENSG00000084234                    | 5747.434869                                            | 5408.205381 |             | 7294.635103 |       |             |
| 3725.342708                        | 3031.802296                                            | 2349.828759 |             | 6150.091784 |       |             |
| 3035.657921                        | 1.018697909                                            | 7.97E-09    |             | 5.42E-07    |       | APLP2       |
| 11                                 | 130068147                                              | 130144811   |             | +           | 7463  |             |
| protein_coding                     | amyloid beta precursor like protein 2 [Source:HGNC     |             |             |             |       |             |
| Symbol;Acc:HGNC:598]               | -                                                      | 6335        | 6111        | 6275        | 3596  | 2656        |
| 2724                               | 41.56826147                                            | 38.79942441 |             | 52.31269993 |       |             |
| 26.77430985                        | 21.87570153                                            | 16.97167395 |             |             |       |             |
| ENSG00000150687                    | 4300.369579                                            | 4168.327171 |             | 4456.992986 |       |             |
| 2849.949329                        | 2132.306735                                            | 2174.713033 |             | 4308.563245 |       |             |
| 2385.656366                        | 0.852806371                                            | 8.77E-09    |             | 5.94E-07    |       | PRSS23      |
| 11                                 | 86791059                                               | 86952910    |             | +           | 11725 |             |
| protein_coding                     | serine protease 23 [Source:HGNC Symbol;Acc:HGNC:14370] |             |             |             |       |             |
| -                                  | 4740                                                   | 4710        | 3834        | 2751        | 1868  | 2521        |
| 19.79676254                        | 19.03419423                                            | 20.34445704 |             | 13.03736375 |       |             |

|                                     |                                                    |             |                |             |     |             |   |
|-------------------------------------|----------------------------------------------------|-------------|----------------|-------------|-----|-------------|---|
| 9.792901375                         | 9.997490783                                        |             |                |             |     |             |   |
| ENSG00000140545                     | 498.9880313                                        | 527.4571113 | 702.1449565    |             |     |             |   |
| 255.8842182                         | 203.1855454                                        | 217.3850394 | 576.1966997    |             |     |             |   |
| 225.4849344                         | 1.352077027                                        | 8.87E-09    | 5.99E-07       |             |     | MFGE8       |   |
| 15                                  | 88898683                                           | 88913411    | -              | 6837        |     |             |   |
| protein_coding                      | milk fat globule-EGF factor 8 protein [Source:HGNC |             |                |             |     |             |   |
| Symbol;Acc:HGNC:7036]               | -                                                  | 550         | 596            | 604         | 247 | 178         |   |
| 252                                 | 3.93936111                                         | 4.130542743 | 5.49639841     |             |     |             |   |
| 2.007443898                         | 1.600301391                                        | 1.713823048 |                |             |     |             |   |
| ENSG00000204389                     | 1297.368881                                        | 2193.902985 | 1163.654142    |             |     |             |   |
| 3056.10706                          | 3481.550076                                        | 4691.893767 | 1551.642002    |             |     |             |   |
| 3743.183634                         | -1.270020187                                       | 9.16E-09    | 6.16E-07       |             |     | HSPA1A      |   |
| 6                                   | 31815464                                           | 31817946    | +              | 2483        |     |             |   |
| protein_coding                      | heat shock protein family A (Hsp70) member 1A      |             |                |             |     |             |   |
| [Source:HGNC Symbol;Acc:HGNC:5232]  | -                                                  |             | 1430           | 2479        |     | 1001        |   |
| 2950                                | 3050                                               | 5439        | 28.20252556    | 47.30709152 |     |             |   |
| 25.08211788                         | 66.01723641                                        | 75.5040904  | 101.8528903    |             |     |             |   |
| ENSG00000099998                     | 29.93928188                                        | 58.40968011 | 66.26202404    |             |     | 0           |   |
| 0                                   | 0                                                  | 51.53699534 | 0              | 8.119211766 |     |             |   |
| 1.00E-08                            | 6.73E-07                                           | GGT5        | 22             | 24219654    |     |             |   |
| 24245142                            | -                                                  | 6054        | protein_coding | gamma-      |     |             |   |
| glutamyltransferase 5               | [Source:HGNC Symbol;Acc:HGNC:4260]                 |             |                |             |     |             | - |
| 33                                  | 66                                                 | 57          | 0              | 0           | 0   | 0.266931733 |   |
| 0.516568548                         | 0.585786401                                        | 0           | 0              | 0           | 0   |             |   |
| ENSG00000087074                     | 2821.550504                                        | 3825.834047 | 2873.679359    |             |     |             |   |
| 5381.856331                         | 5731.430469                                        | 7948.356163 | 3173.68797     |             |     |             |   |
| 6353.880988                         | -1.001467037                                       | 1.03E-08    | 6.88E-07       |             |     |             |   |
| PPP1R15A                            | 19                                                 | 48872392    | 48876057       | +           |     | 3093        |   |
| protein_coding                      | protein phosphatase 1 regulatory subunit 15A       |             |                |             |     |             |   |
| [Source:HGNC Symbol;Acc:HGNC:14375] | -                                                  |             | 3110           | 4323        |     | 2472        |   |
| 5195                                | 5021                                               | 9214        | 49.23899188    | 66.22649279 |     |             |   |
| 49.72506884                         | 93.32922845                                        | 99.78325379 | 138.5157973    |             |     |             |   |
| ENSG00000075223                     | 1347.267684                                        | 1056.684213 | 2070.397628    |             |     |             |   |
| 687.8830806                         | 589.0097833                                        | 433.0448007 | 1491.449842    |             |     |             |   |
| 569.9792216                         | 1.387812407                                        | 1.06E-08    | 7.06E-07       |             |     | SEMA3C      |   |
| 7                                   | 80742538                                           | 80922359    | -              | 6268        |     |             |   |
| protein_coding                      | semaphorin 3C [Source:HGNC Symbol;Acc:HGNC:10725]  |             |                |             |     |             |   |
| -                                   | 1485                                               | 1194        | 1781           | 664         | 516 | 502         |   |
| 11.6018207                          | 9.026134065                                        | 17.67835205 | 5.886418498    |             |     |             |   |
| 5.060204564                         | 3.723966345                                        |             |                |             |     |             |   |
| ENSG00000123473                     | 1490.613337                                        | 1332.802701 | 1471.714429    |             |     |             |   |
| 854.6740083                         | 646.0843747                                        | 671.9958163 | 1431.710155    |             |     |             |   |
| 724.2513998                         | 0.98307878                                         | 1.09E-08    | 7.20E-07       |             |     | STIL        |   |
| 1                                   | 47250139                                           | 47314147    | -              | 7291        |     |             |   |
| protein_coding                      | "STIL, centriolar assembly protein [Source:HGNC    |             |                |             |     |             |   |
| Symbol;Acc:HGNC:10879]"             | -                                                  | 1643        | 1506           | 1266        | 825 | 566         |   |
| 779                                 | 11.03517307                                        | 9.787331865 | 10.80322582    |             |     |             |   |
| 6.28751297                          | 4.771739133                                        | 4.967997602 |                |             |     |             |   |
| ENSG00000121621                     | 853.723159                                         | 474.3574021 | 635.8829325    |             |     |             |   |
| 291.1071471                         | 194.0536108                                        | 186.3300338 | 654.6544978    |             |     |             |   |

|                                                |                                                       |                  |                |        |
|------------------------------------------------|-------------------------------------------------------|------------------|----------------|--------|
| 223.8302639                                    | 1.548954692                                           | 1.12E-08         | 7.41E-07       | KIF18A |
| 11                                             | 28020620                                              | 28108308         | - 4668         |        |
| protein_coding                                 | kinesin family member 18A [Source:HGNC                |                  |                |        |
| Symbol;Acc:HGNC:29441]                         | -                                                     | 941 536          | 547 281        | 170    |
| 216                                            | 9.871597961                                           | 5.4407702        | 7.290600912    |        |
| 3.344933717                                    | 2.238542964                                           | 2.15156228       |                |        |
| ENSG00000100065                                | 275.8042937                                           | 286.7384296      | 304.5728123    |        |
| 102.560881                                     | 90.17785443                                           | 60.38473317      | 289.0385118    |        |
| 84.37448953                                    | 1.780434277                                           | 1.20E-08         | 7.91E-07       | CARD10 |
| 22                                             | 37490362                                              | 37519542         | - 5652         |        |
| protein_coding                                 | caspase recruitment domain family member 10           |                  |                |        |
| [Source:HGNC Symbol;Acc:HGNC:16422]            | -                                                     | 304              | 324            | 262    |
| 99                                             | 79 70                                                 | 2.633905044      | 2.716247239    |        |
| 2.884071247                                    | 0.973296328                                           | 0.859156536      | 0.575873249    |        |
| ENSG00000066056                                | 797.4735991                                           | 1061.109189      | 1394.98998     |        |
| 498.300846                                     | 407.5125827                                           | 245.8521279      | 1084.524256    |        |
| 383.8885189                                    | 1.499347009                                           | 1.24E-08         | 8.11E-07       | TIE1   |
| 1                                              | 43300993                                              | 43323108         | + 6694         |        |
| protein_coding                                 | tyrosine kinase with immunoglobulin like and EGF like |                  |                |        |
| domains 1 [Source:HGNC Symbol;Acc:HGNC:11809]  | -                                                     | 879              | 1199           |        |
| 1200                                           | 481 357                                               | 285 6.430309114  | 8.487111659    |        |
| 11.15327434                                    | 3.992743506                                           | 3.278157898      | 1.979658004    |        |
| ENSG00000164105                                | 678.6237226                                           | 693.8362         | 789.3318303    |        |
| 319.0782964                                    | 335.5985975                                           | 353.6820086      | 720.597251     |        |
| 336.1196342                                    | 1.09909893                                            | 1.36E-08         | 8.87E-07       | SAP30  |
| 4                                              | 173369969                                             | 173377532        | + 1320         |        |
| protein_coding                                 | Sin3A associated protein 30 [Source:HGNC              |                  |                |        |
| Symbol;Acc:HGNC:10532]                         | -                                                     | 748 784          | 679 308        | 294    |
| 410                                            | 27.7495759                                            | 28.14288217      | 32.00388415    |        |
| 12.96548685                                    | 13.6905457                                            | 14.44245236      |                |        |
| ENSG00000143127                                | 2493.125655                                           | 2090.358552      | 2445.882431    |        |
| 1350.902917                                    | 1183.727026                                           | 810.8807026      | 2343.122213    |        |
| 1115.170215                                    | 1.071956554                                           | 1.36E-08         | 8.87E-07       | ITGA10 |
| 1                                              | 145891208                                             | 145910189        | - 6320         |        |
| protein_coding                                 | integrin subunit alpha 10 [Source:HGNC                |                  |                |        |
| Symbol;Acc:HGNC:6135]                          | -                                                     | 2748 2362        | 2104 1304      | 1037   |
| 940                                            | 21.29258226                                           | 17.708805        | 20.71264224    |        |
| 11.46496034                                    | 10.08576949                                           | 6.915789938      |                |        |
| ENSG00000117984                                | 1878.916751                                           | 2402.761841      | 3077.115397    |        |
| 1124.025817                                    | 1313.857094                                           | 1117.980203      | 2452.93133     |        |
| 1185.287705                                    | 1.049091731                                           | 1.38E-08         | 8.93E-07       | CTSD   |
| 11                                             | 1752752 1764573                                       | - 3126           | protein_coding |        |
| cathepsin D [Source:HGNC Symbol;Acc:HGNC:2529] | -                                                     | 2071             | 2715           |        |
| 2647                                           | 1085 1151                                             | 1296 32.44291052 | 41.15354968    |        |
| 52.68315971                                    | 19.28647276                                           | 22.63256155      | 19.27733728    |        |
| ENSG00000128590                                | 505.3387881                                           | 461.9674699      | 445.2343019    |        |
| 943.7672989                                    | 1029.625629                                           | 872.9907138      | 470.8468533    |        |
| 948.7945472                                    | -1.009736186                                          | 1.41E-08         | 9.13E-07       | DNAJB9 |
| 7                                              | 108569568                                             | 108574850        | + 2837         |        |
| protein_coding                                 | DnaJ heat shock protein family (Hsp40) member B9      |                  |                |        |

|                                    |                                                                           |             |             |        |
|------------------------------------|---------------------------------------------------------------------------|-------------|-------------|--------|
| [Source:HGNC Symbol;Acc:HGNC:6968] | -                                                                         | 557         | 522         | 383    |
| 911                                | 902 1012                                                                  | 9.614452163 | 8.718416411 |        |
| 8.399361723                        | 17.84313186                                                               | 19.54314985 | 16.5864023  |        |
| ENSG00000110203                    | 9.07250966                                                                | 6.194966072 | 2.3249833   |        |
| 62.15810969                        | 69.63100152                                                               | 127.6705787 | 5.86415301  |        |
| 86.4865633                         | -3.855846662                                                              | 1.55E-08    | 1.00E-06    | FOLR3  |
| 11                                 | 72114869                                                                  | 72139892    | + 1396      |        |
| protein_coding                     | folate receptor 3 [Source:HGNC Symbol;Acc:HGNC:3795]                      |             |             |        |
| -                                  | 10 7                                                                      | 2 60        | 61 148      |        |
| 0.350786818                        | 0.237595966                                                               | 0.089135648 | 2.388239493 |        |
| 2.685911984                        | 4.929550446                                                               |             |             |        |
| ENSG00000205336                    | 153.3254133                                                               | 160.1841227 | 313.8727455 |        |
| 50.76245625                        | 18.26386925                                                               | 36.2308399  | 209.1274271 |        |
| 35.0857218                         | 2.56852321                                                                | 1.58E-08    | 1.01E-06    | ADGRG1 |
| 16                                 | 57610652                                                                  | 57665580    | + 8659      |        |
| protein_coding                     | adhesion G protein-coupled receptor G1 [Source:HGNC Symbol;Acc:HGNC:4512] |             |             |        |
| -                                  |                                                                           | 169 181     | 270 49      | 16     |
| 42                                 | 0.955757354                                                               | 0.990460764 | 1.940005098 |        |
| 0.31444188                         | 0.113579409                                                               | 0.225534284 |             |        |
| ENSG00000100109                    | 1498.778596                                                               | 1694.765718 | 1487.989312 |        |
| 2384.799475                        | 3126.546117                                                               | 3066.681806 | 1560.511209 |        |
| 2859.342466                        | -0.873448079                                                              | 1.59E-08    | 1.02E-06    | TFIP11 |
| 22                                 | 26491225                                                                  | 26512505    | - 5436      |        |
| protein_coding                     | tuftelin interacting protein 11 [Source:HGNC Symbol;Acc:HGNC:17165]       |             |             |        |
| -                                  |                                                                           | 1652 1915   | 1280 2302   | 2739   |
| 3555                               | 14.88193072                                                               | 16.69228423 | 14.64999135 |        |
| 23.53086623                        | 30.97133633                                                               | 30.40823236 |             |        |
| ENSG00000184661                    | 1151.301476                                                               | 821.2755021 | 1126.454409 |        |
| 488.9771296                        | 393.8146807                                                               | 212.2092051 | 1033.010462 |        |
| 365.0003385                        | 1.502696614                                                               | 1.61E-08    | 1.02E-06    | CDCA2  |
| 8                                  | 25458997                                                                  | 25507920    | + 3908      |        |
| protein_coding                     | cell division cycle associated 2 [Source:HGNC Symbol;Acc:HGNC:14623]      |             |             |        |
| -                                  |                                                                           | 1269 928    | 969 472     | 345    |
| 246                                | 15.90141421                                                               | 11.2517445  | 15.42680779 |        |
| 6.711189273                        | 5.426401202                                                               | 2.926924839 |             |        |
| ENSG00000160049                    | 1841.719461                                                               | 1918.669492 | 1385.690047 |        |
| 3056.10706                         | 3011.255443                                                               | 3611.007044 | 1715.359667 |        |
| 3226.123182                        | -0.910749405                                                              | 1.73E-08    | 1.10E-06    | DFFA   |
| 1                                  | 10456522                                                                  | 10472526    | - 6622      |        |
| protein_coding                     | DNA fragmentation factor subunit alpha [Source:HGNC Symbol;Acc:HGNC:2772] |             |             |        |
| -                                  |                                                                           | 2030 2168   | 1192 2950   | 2638   |
| 4186                               | 15.01189593                                                               | 15.51302678 | 11.19937858 |        |
| 24.75397131                        | 24.48685305                                                               | 29.39280718 |             |        |
| ENSG00000093009                    | 1295.554379                                                               | 1269.968045 | 1418.239813 |        |
| 778.0123397                        | 681.4706214                                                               | 644.3913668 | 1327.920746 |        |
| 701.2914426                        | 0.921126069                                                               | 1.83E-08    | 1.15E-06    | CDC45  |
| 22                                 | 19479459                                                                  | 19520612    | + 2846      |        |
| protein_coding                     | cell division cycle 45 [Source:HGNC Symbol;Acc:HGNC:1739]                 |             |             |        |
| -                                  |                                                                           | 1428 1435   | 1220 751    | 597    |
| 747                                | 24.57095266                                                               | 23.89150159 | 26.67053832 |        |

|                                      |                                                 |             |             |             |        |
|--------------------------------------|-------------------------------------------------|-------------|-------------|-------------|--------|
| 14.66280588                          | 12.89397416                                     | 12.20440818 |             |             |        |
| ENSG00000168461                      | 4943.610514                                     | 4081.597646 | 5596.234803 |             |        |
| 3008.452509                          | 2542.102301                                     | 2134.168998 | 4873.814321 |             |        |
| 2561.574603                          | 0.928079152                                     | 1.96E-08    | 1.23E-06    |             | RAB31  |
| 18                                   | 9708165                                         | 9862551 +   | 5586        |             |        |
| protein_coding                       | "RAB31, member RAS oncogene family [Source:HGNC |             |             |             |        |
| Symbol;Acc:HGNC:9771]"               | -                                               | 5449        | 4612        | 4814        | 2904   |
| 2474                                 | 47.76882514                                     | 39.12143783 | 53.61817171 |             | 2227   |
| 28.88735139                          | 24.50567367                                     | 20.59348189 |             |             |        |
| ENSG00000130592                      | 445.4602243                                     | 478.7823778 | 867.2187708 |             |        |
| 187.5102976                          | 171.2237742                                     | 52.62098176 | 597.153791  |             |        |
| 137.1183512                          | 2.126135274                                     | 2.17E-08    | 1.36E-06    |             | LSP1   |
| 11                                   | 1852970                                         | 1892267 +   | 5399        |             |        |
| lymphocyte specific protein 1        | [Source:HGNC Symbol;Acc:HGNC:6707]              |             |             |             |        |
| -                                    | 491                                             | 541         | 746         | 181         | 150    |
| 4.453452743                          | 4.747996372                                     | 8.596711386 | 1.862847447 | 61          |        |
| 1.707753924                          | 0.525348535                                     |             |             |             |        |
| ENSG00000166963                      | 896.3639544                                     | 1085.004058 | 799.7942551 |             |        |
| 1574.672112                          | 1845.792286                                     | 2063.432596 | 927.0540891 |             |        |
| 1827.965665                          | -0.978873579                                    | 2.25E-08    | 1.41E-06    |             | MAP1A  |
| 15                                   | 43510958                                        | 43531620    | + 10629     |             |        |
| protein_coding                       | microtubule associated protein 1A [Source:HGNC  |             |             |             |        |
| Symbol;Acc:HGNC:6835]"               | -                                               | 988         | 1226        | 688         | 1520   |
| 2392                                 | 4.55190533                                      | 5.46543211  | 4.027197029 |             | 1617   |
| 7.946268299                          | 9.351148914                                     | 10.46404952 |             |             |        |
| ENSG00000082781                      | 4528.089571                                     | 4186.912069 | 5209.125083 |             |        |
| 2623.072229                          | 2633.421648                                     | 1634.700991 | 4641.375575 |             |        |
| 2297.064956                          | 1.015188583                                     | 2.30E-08    | 1.43E-06    |             | ITGB5  |
| 3                                    | 124761948                                       | 124901418   | - 6447      |             |        |
| protein_coding                       | integrin subunit beta 5 [Source:HGNC            |             |             |             |        |
| Symbol;Acc:HGNC:6160]"               | -                                               | 4991        | 4731        | 4481        | 2532   |
| 1895                                 | 37.91041889                                     | 34.7713633  | 43.24382691 |             | 2307   |
| 21.82318201                          | 21.99567452                                     | 13.6672948  |             |             |        |
| ENSG00000167693                      | 54.43505796                                     | 26.54985459 | 62.77454909 |             | 0      |
| 0                                    | 0                                               | 47.91982055 | 0           | 8.013842704 |        |
| 2.33E-08                             | 1.44E-06                                        | NXN         | 17          | 799313      | 979770 |
| 5880                                 | protein_coding nucleoredoxin [Source:HGNC       |             |             |             |        |
| Symbol;Acc:HGNC:18008]"              | -                                               | 60          | 30          | 54          | 0      |
| 0                                    | 0.499692243                                     | 0.241752164 | 0.571377692 |             | 0      |
| 0                                    | 0                                               |             |             |             |        |
| ENSG00000119865                      | 967.1295297                                     | 877.0301967 | 1012.530227 |             |        |
| 509.6964995                          | 472.5776169                                     | 364.8963162 | 952.2299845 |             |        |
| 449.0568108                          | 1.085547415                                     | 2.34E-08    | 1.44E-06    |             | CNRIP1 |
| 2                                    | 68284171                                        | 68320051    | - 3548      |             |        |
| protein_coding                       | cannabinoid receptor interacting protein 1      |             |             |             |        |
| [Source:HGNC Symbol;Acc:HGNC:24546]" | -                                               |             | 1066        | 991         | 871    |
| 492                                  | 414                                             | 423         | 14.7130353  | 13.23477262 |        |
| 15.27359922                          | 7.705370666                                     | 7.1723932   | 5.543547515 |             |        |
| ENSG00000137563                      | 1749.179862                                     | 1577.946358 | 1753.037408 |             |        |
| 1025.60881                           | 612.9811117                                     | 773.7872236 | 1693.387876 |             |        |

|                                    |                                                 |             |                  |             |
|------------------------------------|-------------------------------------------------|-------------|------------------|-------------|
| 804.1257151                        | 1.073902126                                     | 2.51E-08    | 1.55E-06         | GGH         |
| 8                                  | 63015079                                        | 63039171    | - 3130           |             |
| protein_coding                     | gamma-glutamyl hydrolase [Source:HGNC           |             |                  |             |
| Symbol;Acc:HGNC:4248]              | -                                               | 1928 1783   | 1508 990         | 537         |
| 897                                | 30.16416971                                     | 26.99189939 | 29.97532155      |             |
| 17.57530622                        | 10.54574604                                     | 13.3253653  |                  |             |
| ENSG00000160113                    | 1625.793731                                     | 1754.060393 | 1915.786239      |             |
| 890.9329056                        | 1053.596957                                     | 974.7821212 | 1765.213455      |             |
| 973.1039947                        | 0.859062058                                     | 2.62E-08    | 1.61E-06         | NR2F6       |
| 19                                 | 17231883                                        | 17245940    | - 2676           |             |
| protein_coding                     | nuclear receptor subfamily 2 group F member 6   |             |                  |             |
| [Source:HGNC Symbol;Acc:HGNC:7977] |                                                 | RXR-like    | 1792 1982        |             |
| 1648                               | 860 923                                         | 1130        | 32.79295702      | 35.09489779 |
| 38.31580416                        | 17.85765325                                     | 21.20132249 | 19.63465852      |             |
| ENSG00000210140                    | 626.0031665                                     | 1082.349072 | 805.6067134      |             |
| 1477.291074                        | 1940.536108                                     | 2715.587715 | 837.9863174      |             |
| 2044.471632                        | -1.286871014                                    | 2.92E-08    | 1.79E-06         | MT-TC       |
| MT                                 | 5761 5826                                       | - 66        | Mt_tRNA          |             |
| mitochondrially                    | encoded tRNA cysteine [Source:HGNC              |             |                  |             |
| Symbol;Acc:HGNC:7477]              | -                                               | 690 1223    | 693 1426         | 1700        |
| 3148                               | 511.9574164                                     | 878.0292064 | 653.275161       |             |
| 1200.570405                        | 1583.260387                                     | 2217.797075 |                  |             |
| ENSG00000109586                    | 757.5545566                                     | 544.2720192 | 656.8077822      |             |
| 292.1431156                        | 300.2123508                                     | 215.6597613 | 652.8781193      |             |
| 269.3384092                        | 1.279413491                                     | 2.94E-08    | 1.79E-06         | GALNT7      |
| 4                                  | 173168753                                       | 173323967   | + 6865           |             |
| protein_coding                     | polypeptide N-acetylgalactosaminyltransferase 7 |             |                  |             |
| [Source:HGNC Symbol;Acc:HGNC:4129] |                                                 | -           | 835 615          | 565         |
| 282                                | 263 250                                         | 5.956273308 | 4.244836969      |             |
| 5.120528089                        | 2.282551633                                     | 2.354846305 | 1.693286653      |             |
| ENSG00000273812                    | 304.8363246                                     | 340.723134  | 569.6209084      |             |
| 146.0715578                        | 113.007691                                      | 67.28584553 | 405.0601223      |             |
| 108.7883648                        | 1.898626169                                     | 2.94E-08    | 1.79E-06         |             |
| BX640514.2                         | 20 62596732                                     | 62603115    | -                | 625         |
| lincRNA                            | novel transcript                                | -           | 336 385          | 490         |
| 141                                | 99 78                                           | 26.32618589 | 29.18818922      |             |
| 48.77787869                        | 12.53577357                                     | 9.736492585 | 5.802906907      |             |
| ENSG00000113368                    | 4524.460567                                     | 3762.999391 | 4158.232632      |             |
| 2642.75563                         | 2036.421421                                     | 1561.376672 | 4148.564197      |             |
| 2080.184575                        | 0.996292522                                     | 3.08E-08    | 1.86E-06         | LMNB1       |
| 5                                  | 126776623                                       | 126837020   | + 3633           |             |
| protein_coding                     | lamin B1 [Source:HGNC Symbol;Acc:HGNC:6637]     |             |                  | -           |
| 4987                               | 4252 3577                                       | 2551 1784   | 1810 67.22064168 |             |
| 55.45673523                        | 61.257658                                       | 39.01729025 | 30.1840014       |             |
| 23.16563425                        |                                                 |             |                  |             |
| ENSG00000168393                    | 1457.045051                                     | 1827.514991 | 1785.587174      |             |
| 993.4937866                        | 882.3731832                                     | 849.6994596 | 1690.049072      |             |
| 908.5221431                        | 0.895508271                                     | 3.77E-08    | 2.27E-06         | DTYMK       |
| 2                                  | 241675742                                       | 241686991   | - 2451           |             |
| protein_coding                     | deoxythymidylate kinase [Source:HGNC            |             |                  |             |

|                        |                                                       |             |      |             |       |             |
|------------------------|-------------------------------------------------------|-------------|------|-------------|-------|-------------|
| Symbol;Acc:HGNC:3061]  | -                                                     | 1606        | 2065 | 1536        | 959   | 773         |
| 985                    | 32.08713291                                           | 39.92116307 |      | 38.99013609 |       |             |
| 21.74139165            | 19.38579174                                           | 18.68632669 |      |             |       |             |
| ENSG00000120738        | 380.1381547                                           | 302.6683424 |      | 349.9099866 |       |             |
| 1367.478413            | 775.0729513                                           | 650.4298401 |      | 344.2388279 |       |             |
| 930.9937349            | -1.435181749                                          | 3.78E-08    |      | 2.27E-06    |       | EGR1        |
| 5                      | 138465490                                             | 138469315   |      | +           | 3138  |             |
| protein_coding         | early growth response 1 [Source:HGNC                  |             |      |             |       |             |
| Symbol;Acc:HGNC:3238]  | zf-C2H2                                               | 419         | 342  | 301         | 1320  | 679         |
| 754                    | 6.538675236                                           | 5.164159027 |      | 5.967884412 |       |             |
| 23.37399978            | 13.30038447                                           | 11.17247585 |      |             |       |             |
| ENSG00000128595        | 7017.586222                                           | 6099.386595 |      | 8132.791583 |       |             |
| 4561.369283            | 3885.638183                                           | 3551.484949 |      | 7083.2548   |       |             |
| 3999.497472            | 0.82454342                                            | 3.95E-08    |      | 2.37E-06    |       | CALU        |
| 7                      | 128739292                                             | 128771807   |      | +           | 4537  |             |
| protein_coding         | calumenin [Source:HGNC                                |             |      |             |       |             |
| Symbol;Acc:HGNC:1458]  | -                                                     |             |      |             |       |             |
| 7735                   | 6892                                                  | 6996        | 4403 | 3404        | 4117  | 83.48726275 |
| 71.97852294            | 95.93738314                                           | 53.92522301 |      | 46.1177523  |       |             |
| 42.19326234            |                                                       |             |      |             |       |             |
| ENSG00000213949        | 448.1819772                                           | 247.7986429 |      | 466.1591516 |       |             |
| 138.8197783            | 116.4321665                                           | 104.3793245 |      | 387.3799239 |       |             |
| 119.8770898            | 1.69217015                                            | 4.11E-08    |      | 2.46E-06    |       | ITGA1       |
| 5                      | 52787896                                              | 52959210    |      | +           | 18566 |             |
| protein_coding         | integrin subunit alpha 1 [Source:HGNC                 |             |      |             |       |             |
| Symbol;Acc:HGNC:6134]  | -                                                     | 494         | 280  | 401         | 134   | 102         |
| 121                    | 1.30297861                                            | 0.714605124 |      | 1.343794543 |       |             |
| 0.401049977            | 0.337698542                                           | 0.303038664 |      |             |       |             |
| ENSG00000132128        | 2536.673701                                           | 3167.397653 |      | 2822.529726 |       |             |
| 4247.470829            | 5378.709494                                           | 5328.521383 |      | 2842.20036  |       |             |
| 4984.900569            | -0.81053286                                           | 4.27E-08    |      | 2.54E-06    |       | LRR41       |
| 1                      | 46261196                                              | 46303608    |      | -           | 8606  |             |
| protein_coding         | leucine rich repeat containing 41 [Source:HGNC        |             |      |             |       |             |
| Symbol;Acc:HGNC:16917] | -                                                     | 2796        | 3579 | 2428        | 4100  | 4712        |
| 6177                   | 15.90979226                                           | 19.70546999 |      | 17.55311456 |       |             |
| 26.47247572            | 33.65513215                                           | 33.37392439 |      |             |       |             |
| ENSG00000130584        | 288.5058072                                           | 296.4733763 |      | 365.0223781 |       |             |
| 127.4241249            | 82.18741163                                           | 98.34085116 |      | 316.6671872 |       |             |
| 102.6507959            | 1.623281686                                           | 4.43E-08    |      | 2.63E-06    |       | ZBTB46      |
| 20                     | 63743666                                              | 63831244    |      | -           | 6084  |             |
| protein_coding         | zinc finger and BTB domain containing 46 [Source:HGNC |             |      |             |       |             |
| Symbol;Acc:HGNC:16094] | -                                                     | 318         | 335  | 314         | 123   | 72          |
| 114                    | 2.559567565                                           | 2.60904784  |      | 3.211051635 |       |             |
| 1.123383264            | 0.727429068                                           | 0.87125777  |      |             |       |             |
| ENSG00000129355        | 371.0656451                                           | 428.3376541 |      | 611.4706078 |       |             |
| 140.8917153            | 110.7247073                                           | 203.5828147 |      | 470.2913023 |       |             |
| 151.7330791            | 1.62650701                                            | 4.57E-08    |      | 2.70E-06    |       | CDKN2D      |
| 19                     | 10566462                                              | 10569059    |      | -           | 1503  |             |
| protein_coding         | cyclin dependent kinase inhibitor 2D [Source:HGNC     |             |      |             |       |             |
| Symbol;Acc:HGNC:1790]  | -                                                     | 409         | 484  | 526         | 136   | 97          |
| 236                    | 13.32579141                                           | 15.25853443 |      | 21.77376895 |       |             |



|                        |                                                     |             |             |             |        |      |
|------------------------|-----------------------------------------------------|-------------|-------------|-------------|--------|------|
| 5.027961823            | 3.96698094                                          | 7.301028446 |             |             |        |      |
| ENSG00000137809        | 202.3169654                                         | 155.7591469 | 288.2979292 |             |        |      |
| 39.36680281            | 60.49906689                                         | 17.25278091 | 215.4580138 |             |        |      |
| 39.0395502             | 2.475087501                                         | 4.79E-08    | 2.82E-06    |             | ITGA11 |      |
| 15                     | 68296533                                            | 68432162    | -           | 10864       |        |      |
| protein_coding         | integrin subunit alpha 11 [Source:HGNC              |             |             |             |        |      |
| Symbol;Acc:HGNC:6136]  | -                                                   | 223         | 176         | 248         | 38     | 53   |
| 20                     | 1.005179886                                         | 0.767625427 | 1.420262991 |             |        |      |
| 0.194359549            | 0.299870313                                         | 0.085599506 |             |             |        |      |
| ENSG00000104341        | 3780.514775                                         | 3526.705685 | 3666.498664 |             |        |      |
| 2477.000671            | 1867.480631                                         | 1903.844373 | 3657.906375 |             |        |      |
| 2082.775225            | 0.81255772                                          | 5.20E-08    | 3.06E-06    |             |        |      |
| LAPTM4B                | 8                                                   | 97775057    | 97853013    | +           | 3197   |      |
| protein_coding         | lysosomal protein transmembrane 4 beta [Source:HGNC |             |             |             |        |      |
| Symbol;Acc:HGNC:13646] | -                                                   | 4167        | 3985        | 3154        | 2391   | 1636 |
| 2207                   | 63.82775182                                         | 59.0625414  | 61.37986082 |             |        |      |
| 41.55745885            | 31.45487932                                         | 32.09894178 |             |             |        |      |
| ENSG00000185728        | 2564.798481                                         | 2352.317117 | 2405.195224 |             |        |      |
| 3787.500817            | 3867.374314                                         | 4156.19492  | 2440.770274 |             |        |      |
| 3937.02335             | -0.68984237                                         | 5.22E-08    | 3.06E-06    |             | YTHDF3 |      |
| 8                      | 63168553                                            | 63212786    | +           | 6163        |        |      |
| protein_coding         | YTH N6-methyladenosine RNA binding protein 3        |             |             |             |        |      |
| [Source:HGNC           | Symbol;Acc:HGNC:26465]                              | -           | 2827        | 2658        |        | 2069 |
| 3656                   | 3388                                                | 4818        | 22.462719   | 20.43568735 |        |      |
| 20.88695685            | 32.96294934                                         | 33.79080936 | 36.35010302 |             |        |      |
| ENSG00000160957        | 1538.697638                                         | 1709.810636 | 1422.889779 |             |        |      |
| 698.2427656            | 835.5720182                                         | 925.6116956 | 1557.132685 |             |        |      |
| 819.8088265            | 0.925325778                                         | 5.24E-08    | 3.06E-06    |             | RECQL4 |      |
| 8                      | 144511288                                           | 144517845   | -           | 4236        |        |      |
| protein_coding         | RecQ like helicase 4 [Source:HGNC                   |             |             |             |        |      |
| Symbol;Acc:HGNC:9949]  | -                                                   | 1696        | 1932        | 1224        | 674    | 732  |
| 1073                   | 19.60643257                                         | 21.61113675 | 17.97762483 |             |        |      |
| 8.841297182            | 10.62190688                                         | 11.77808783 |             |             |        |      |
| ENSG00000121060        | 2351.594504                                         | 2312.492335 | 2272.671176 |             |        |      |
| 3403.156506            | 4277.16988                                          | 3938.809881 | 2312.252671 |             |        |      |
| 3873.045422            | -0.744028611                                        | 5.55E-08    | 3.23E-06    |             | TRIM25 |      |
| 17                     | 56836387                                            | 56914080    | -           | 9501        |        |      |
| protein_coding         | tripartite motif containing 25 [Source:HGNC         |             |             |             |        |      |
| Symbol;Acc:HGNC:12932] | -                                                   | 2592        | 2613        | 1955        | 3285   | 3747 |
| 4566                   | 13.35962792                                         | 13.03156374 | 12.80219065 |             |        |      |
| 19.21224426            | 24.24162536                                         | 22.34588746 |             |             |        |      |
| ENSG00000130706        | 4180.612451                                         | 5009.072567 | 4347.718771 |             |        |      |
| 6403.321267            | 8660.4985                                           | 9348.419334 | 4512.467929 |             |        |      |
| 8137.413034            | -0.850646785                                        | 5.69E-08    | 3.30E-06    |             | ADRM1  |      |
| 20                     | 62302093                                            | 62308862    | +           | 2142        |        |      |
| protein_coding         | adhesion regulating molecule 1 [Source:HGNC         |             |             |             |        |      |
| Symbol;Acc:HGNC:15759] | -                                                   | 4608        | 5660        | 3740        | 6181   | 7587 |
| 10837                  | 105.3468823                                         | 125.2054996 | 108.6323019 |             |        |      |
| 160.3434858            | 217.7198256                                         | 235.2451211 |             |             |        |      |
| ENSG00000143799        | 8227.85901                                          | 7592.373419 | 7878.205911 |             |        |      |

|                                    |                                                 |             |             |                  |
|------------------------------------|-------------------------------------------------|-------------|-------------|------------------|
| 5503.064645                        | 4479.213934                                     | 4293.354528 | 7899.479447 |                  |
| 4758.544369                        | 0.731319126                                     | 6.05E-08    | 3.50E-06    | PARP1            |
| 1                                  | 226360691                                       | 226408079   | - 7169      |                  |
| protein_coding                     | poly(ADP-ribose) polymerase 1 [Source:HGNC      |             |             |                  |
| Symbol;Acc:HGNC:270]               | Others                                          | 9069        | 8579        | 6777 5312 3924   |
| 4977                               | 61.948316                                       | 56.70280304 | 58.81468182 |                  |
| 41.17290684                        | 33.64478664                                     | 32.28048703 |             |                  |
| ENSG00000129315                    | 1378.114217                                     | 1344.307638 | 1208.991316 |                  |
| 2191.073367                        | 2128.88226                                      | 2398.136546 | 1310.471057 |                  |
| 2239.364057                        | -0.772761774                                    | 6.11E-08    | 3.52E-06    | CCNT1            |
| 12                                 | 48688458                                        | 48716998    | - 7381      |                  |
| protein_coding                     | cyclin T1 [Source:HGNC Symbol;Acc:HGNC:1599]    |             |             | -                |
| 1519                               | 1519                                            | 1040        | 2115 1865   | 2780 10.07792802 |
| 9.751445758                        | 8.766474636                                     | 15.92235161 | 15.53141381 |                  |
| 17.51300246                        |                                                 |             |             |                  |
| ENSG00000161800                    | 2578.407245                                     | 2138.14829  | 2572.594021 |                  |
| 1550.844837                        | 1231.669683                                     | 1236.161752 | 2429.716519 |                  |
| 1339.558757                        | 0.85893344                                      | 6.15E-08    | 3.53E-06    |                  |
| RACGAP1 12                         | 49976923                                        | 50033136    | - 4487      |                  |
| protein_coding                     | Rac GTPase activating protein 1 [Source:HGNC    |             |             |                  |
| Symbol;Acc:HGNC:9804]              | -                                               | 2842        | 2416        | 2213 1497 1079   |
| 1433                               | 31.01677843                                     | 25.51333909 | 30.68542841 |                  |
| 18.53863588                        | 14.78130353                                     | 14.84981827 |             |                  |
| ENSG00000105671                    | 2092.120728                                     | 2750.564936 | 2494.707081 |                  |
| 3685.975905                        | 4613.909969                                     | 5221.554141 | 2445.797581 |                  |
| 4507.146672                        | -0.882072887                                    | 6.41E-08    | 3.67E-06    | DDX49            |
| 19                                 | 18919675                                        | 18928633    | + 2780      |                  |
| protein_coding                     | DEAD-box helicase 49 [Source:HGNC               |             |             |                  |
| Symbol;Acc:HGNC:18684]             | -                                               | 2306        | 3108        | 2146 3558 4042   |
| 6053                               | 40.62030599                                     | 52.97398632 | 48.02769769 |                  |
| 71.11696126                        | 89.37146426                                     | 101.2411095 |             |                  |
| ENSG00000109971                    | 66121.35765                                     | 71464.24361 | 64555.4863  |                  |
| 97701.15279                        | 105683.8794                                     | 102998.2394 | 67380.36252 |                  |
| 102127.7572                        | -0.599964183                                    | 6.53E-08    | 3.73E-06    | HSPA8            |
| 11                                 | 123057489                                       | 123063230   | - 4849      |                  |
| protein_coding                     | heat shock protein family A (Hsp70) member 8    |             |             |                  |
| [Source:HGNC Symbol;Acc:HGNC:5241] | -                                               |             | 72881 80751 | 55532            |
| 94309                              | 92584                                           | 119399      | 736.0220451 | 789.0820532      |
| 712.5215065                        | 1080.719529                                     | 1173.629767 | 1144.931551 |                  |
| ENSG00000136695                    | 29.93928188                                     | 50.44472373 | 43.01219105 |                  |
| 178.1865811                        | 586.7267997                                     | 1051.556996 | 41.13206555 |                  |
| 605.4901257                        | -3.880254408                                    | 6.56E-08    | 3.73E-06    | IL36RN           |
| 2                                  | 113058638                                       | 113065382   | + 3299      |                  |
| protein_coding                     | interleukin 36 receptor antagonist [Source:HGNC |             |             |                  |
| Symbol;Acc:HGNC:15561]             | -                                               | 33          | 57          | 37 172 514       |
| 1219                               | 0.489846837                                     | 0.818689049 | 0.697792432 |                  |
| 2.897064571                        | 9.576970808                                     | 17.18115707 |             |                  |
| ENSG00000104824                    | 4684.136737                                     | 4608.169762 | 5203.312625 |                  |
| 2786.755251                        | 3151.658938                                     | 3038.214717 | 4831.873042 |                  |
| 2992.209635                        | 0.691236646                                     | 7.20E-08    | 4.08E-06    | HNRNPL           |

|                                      |                                                        |  |             |             |             |       |
|--------------------------------------|--------------------------------------------------------|--|-------------|-------------|-------------|-------|
| 19                                   | 38836388                                               |  | 38852347    | -           | 6821        |       |
| protein_coding                       | heterogeneous nuclear ribonucleoprotein L [Source:HGNC |  |             |             |             |       |
| Symbol;Acc:HGNC:5045]                | -                                                      |  | 5163 5207   | 4476        | 2690        | 2761  |
| 3522                                 | 37.06660065                                            |  | 36.17145419 | 40.82713219 |             |       |
| 21.91372837                          | 24.88087889                                            |  | 24.00890318 |             |             |       |
| ENSG00000170017                      | 4083.536598                                            |  | 2772.689815 | 4279.131763 |             |       |
| 2238.727917                          | 1578.683198                                            |  | 1224.084805 | 3711.786059 |             |       |
| 1680.49864                           | 1.143402502                                            |  | 7.35E-08    | 4.16E-06    |             | ALCAM |
| 3                                    | 105366909                                              |  | 105576900   | +           | 7179        |       |
| protein_coding                       | activated leukocyte cell adhesion molecule             |  |             |             |             |       |
| [Source:HGNC Symbol;Acc:HGNC:400]    | -                                                      |  |             | 4501        | 3133        | 3681  |
| 2161                                 | 1383 1419                                              |  | 30.70250022 | 20.67868332 |             |       |
| 31.9013242                           | 16.72641459                                            |  | 11.84146913 | 9.190718412 |             |       |
| ENSG00000132561                      | 217.7402318                                            |  | 102.6594378 | 187.1611556 |             |       |
| 43.51067679                          | 11.41491828                                            |  | 11.21430759 | 169.1869417 |             |       |
| 22.04663422                          | 2.942979593                                            |  | 7.47E-08    | 4.21E-06    |             | MATN2 |
| 8                                    | 97868840                                               |  | 98036716    | +           | 6933        |       |
| protein_coding                       | matrilin 2 [Source:HGNC Symbol;Acc:HGNC:6908]          |  |             |             |             | -     |
| 240                                  | 116 161                                                |  | 42 10       | 13          | 1.69519134  |       |
| 0.792799249                          | 1.444812607                                            |  | 0.336620169 | 0.08865968  |             |       |
| 0.087187288                          |                                                        |  |             |             |             |       |
| ENSG00000146648                      | 2683.648357                                            |  | 2155.848193 | 2953.891282 |             |       |
| 1638.902159                          | 918.9009217                                            |  | 1004.111849 | 2597.795944 |             |       |
| 1187.304976                          | 1.129408722                                            |  | 7.51E-08    | 4.22E-06    |             | EGFR  |
| 7                                    | 55019021                                               |  | 55211628    | +           | 12521       |       |
| protein_coding                       | epidermal growth factor receptor [Source:HGNC          |  |             |             |             |       |
| Symbol;Acc:HGNC:3236]                | -                                                      |  | 2958 2436   | 2541        | 1582        | 805   |
| 1164                                 | 11.56878734                                            |  | 9.218594441 | 12.62619511 |             |       |
| 7.020685315                          | 3.951884335                                            |  | 4.322599341 |             |             |       |
| ENSG00000185269                      | 98.89035529                                            |  | 182.3090015 | 272.0230461 |             |       |
| 40.4027713                           | 35.38624667                                            |  | 18.11541995 | 184.4074676 |             |       |
| 31.30147931                          | 2.564166742                                            |  | 7.77E-08    | 4.35E-06    |             | NOTUM |
| 17                                   | 81952507                                               |  | 81961840    | -           | 3019        |       |
| protein_coding                       | "notum, palmitoleoyl-protein carboxylesterase          |  |             |             |             |       |
| [Source:HGNC Symbol;Acc:HGNC:27106]" | -                                                      |  |             | 109         | 206         | 234   |
| 39                                   | 31 21                                                  |  | 1.768039928 | 3.233184947 |             |       |
| 4.822359586                          | 0.717816666                                            |  | 0.631169408 | 0.323435138 |             |       |
| ENSG00000117758                      | 1398.073739                                            |  | 1302.712865 | 1486.82682  |             |       |
| 2069.865053                          | 2706.477125                                            |  | 2801.851619 | 1395.871141 |             |       |
| 2526.064599                          | -0.856182987                                           |  | 7.87E-08    | 4.38E-06    |             | STX12 |
| 1                                    | 27773183                                               |  | 27824452    | +           | 3846        |       |
| protein_coding                       | syntaxin 12 [Source:HGNC Symbol;Acc:HGNC:11430]        |  |             |             |             | -     |
| 1541                                 | 1472 1279                                              |  | 1998 2371   | 3248        | 19.62104087 |       |
| 18.13530947                          | 20.69036305                                            |  | 28.8667737  | 37.89392876 |             |       |
| 39.26790745                          |                                                        |  |             |             |             |       |
| ENSG00000154839                      | 891.8276996                                            |  | 702.6861516 | 875.3562124 |             |       |
| 426.8190199                          | 277.3825142                                            |  | 171.66517   | 823.2900212 |             |       |
| 291.9555681                          | 1.497371856                                            |  | 7.88E-08    | 4.38E-06    |             | SKA1  |
| 18                                   | 50374995                                               |  | 50394173    | +           | 2950        |       |
| protein_coding                       | spindle and kinetochore associated complex subunit 1   |  |             |             |             |       |

|                                     |                                               |             |             |             |
|-------------------------------------|-----------------------------------------------|-------------|-------------|-------------|
| [Source:HGNC Symbol;Acc:HGNC:28109] | -                                             | 983         | 794         | 753         |
| 412                                 | 243                                           | 199         | 16.31774663 | 12.75336905 |
| 15.88107171                         | 7.76045605                                    | 5.06327619  | 3.136621237 |             |
| ENSG00000175745                     | 3296.042759                                   | 2781.539766 | 3292.176352 |             |
| 2074.008927                         | 1493.071311                                   | 1488.914992 | 3123.252959 |             |
| 1685.331743                         | 0.890008254                                   | 8.49E-08    | 4.70E-06    | NR2F1       |
| 5                                   | 93583224                                      | 93594615    | + 4314      |             |
| protein_coding                      | nuclear receptor subfamily 2 group F member 1 |             |             |             |
| [Source:HGNC Symbol;Acc:HGNC:7975]  | RXR-like                                      | 3633        | 3143        |             |
| 2832                                | 2002                                          | 1308        | 1726        | 41.23955218 |
| 40.84321823                         | 25.78671237                                   | 18.63695529 | 18.60337193 |             |
| ENSG00000186854                     | 184.1719461                                   | 172.5740549 | 172.0487642 |             |
| 49.72648776                         | 7.990442797                                   | 15.52750281 | 176.2649217 |             |
| 24.41481112                         | 2.851604551                                   | 8.50E-08    | 4.70E-06    |             |
| TRABD2A 2                           | 84821650                                      | 84907008    | - 8771      |             |
| protein_coding                      | TraB domain containing 2A [Source:HGNC        |             |             |             |
| Symbol;Acc:HGNC:27013]              | -                                             | 203         | 195         | 148         |
| 18                                  | 1.133380172                                   | 1.053445182 | 1.049831141 | 7           |
| 0.304091422                         | 0.049056469                                   | 0.095423296 |             |             |
| ENSG00000107438                     | 1156.744982                                   | 1137.218772 | 1535.65147  |             |
| 715.85423                           | 630.1034892                                   | 546.0505157 | 1276.538408 |             |
| 630.6694116                         | 1.01715787                                    | 8.55E-08    | 4.71E-06    | PDLIM1      |
| 10                                  | 95237572                                      | 95291024    | - 2239      |             |
| protein_coding                      | PDZ and LIM domain 1 [Source:HGNC             |             |             |             |
| Symbol;Acc:HGNC:2067]               | -                                             | 1275        | 1285        | 1321        |
| 633                                 | 27.88590701                                   | 27.19414913 | 36.70756451 | 552         |
| 17.14888932                         | 15.15417661                                   | 13.1456067  |             |             |
| ENSG00000130766                     | 476.3067571                                   | 585.8667914 | 549.8585504 |             |
| 845.3502918                         | 1283.036815                                   | 1394.887336 | 537.344033  |             |
| 1174.424814                         | -1.128439338                                  | 9.18E-08    | 5.04E-06    | SESN2       |
| 1                                   | 28259527                                      | 28282491    | + 3453      |             |
| protein_coding                      | sestrin 2 [Source:HGNC Symbol;Acc:HGNC:20746] |             |             | -           |
| 525                                 | 662                                           | 473         | 816         | 1124        |
| 9.084224363                         | 8.522586327                                   | 13.13123652 | 20.00861801 |             |
| 21.77431291                         |                                               |             |             |             |
| ENSG00000150093                     | 10702.83965                                   | 9232.269437 | 12508.41015 |             |
| 7129.535182                         | 5954.021376                                   | 5252.609147 | 10814.50641 |             |
| 6112.055235                         | 0.823225092                                   | 9.51E-08    | 5.21E-06    | ITGB1       |
| 10                                  | 32900319                                      | 33005792    | - 6011      |             |
| protein_coding                      | integrin subunit beta 1 [Source:HGNC          |             |             |             |
| Symbol;Acc:HGNC:6153]               | -                                             | 11797       | 10432       | 10760       |
| 6089                                | 96.10667119                                   | 82.23321906 | 111.3710694 | 5216        |
| 63.61799592                         | 53.33818274                                   | 47.1010148  |             |             |
| ENSG00000135111                     | 1389.001229                                   | 1281.472982 | 1596.101035 |             |
| 727.2498834                         | 843.562461                                    | 575.3802432 | 1422.191749 |             |
| 715.3975292                         | 0.992244761                                   | 1.01E-07    | 5.49E-06    | TBX3        |
| 12                                  | 114670254                                     | 114684164   | - 5950      |             |
| protein_coding                      | T-box 3 [Source:HGNC Symbol;Acc:HGNC:11602]   |             |             | T-box       |
| 1531                                | 1448                                          | 1373        | 702         | 739         |
| 11.53129379                         | 14.35689149                                   | 6.555898031 | 7.63439863  |             |

5.212425807

|                          |                                                        |                  |                       |        |  |
|--------------------------|--------------------------------------------------------|------------------|-----------------------|--------|--|
| ENSG00000138080          | 2660.059832                                            | 3162.087682      | 3549.087007           |        |  |
| 1783.937748              | 1929.12119                                             | 1589.84376       | 3123.74484            |        |  |
| 1767.634233              | 0.821571485                                            | 1.10E-07         | 6.00E-06              |        |  |
| EMILIN1 2                | 27078567                                               | 27086408         | + 3958                |        |  |
| protein_coding           | elastin microfibril interfacier 1 [Source:HGNC         |                  |                       |        |  |
| Symbol;Acc:HGNC:19880]   | -                                                      | 2932 3573        | 3053 1722             | 1690   |  |
| 1843                     | 36.27578837                                            | 42.77437447      | 47.99078579           |        |  |
| 24.17516244              | 26.24570693                                            | 21.65112979      |                       |        |  |
| ENSG00000069275          | 16341.4044                                             | 13295.28219      | 15527.40097           |        |  |
| 10111.05251              | 8966.41831                                             | 7372.97592       | 15054.69585           |        |  |
| 8816.81558               | 0.771969346                                            | 1.12E-07         | 6.09E-06              | NUCKS1 |  |
| 1                        | 205712819                                              | 205750276        | - 6546                |        |  |
| protein_coding           | nuclear casein kinase and cyclin dependent kinase      |                  |                       |        |  |
| substrate 1 [Source:HGNC | Symbol;Acc:HGNC:29923] - 18012 15023                   |                  |                       |        |  |
| 13357                    | 9760 7855                                              | 8547 134.7456088 | 108.7444515           |        |  |
| 126.9520656              | 82.84873093                                            | 73.75942944      | 60.71118658           |        |  |
| ENSG00000137845          | 1752.808866                                            | 1359.352555      | 2092.48497            |        |  |
| 1035.968495              | 684.8950969                                            | 653.8803963      | 1734.88213            |        |  |
| 791.5813294              | 1.131834036                                            | 1.15E-07         | 6.19E-06              | ADAM10 |  |
| 15                       | 58588807                                               | 58749978         | - 16168               |        |  |
| protein_coding           | ADAM metallopeptidase domain 10 [Source:HGNC           |                  |                       |        |  |
| Symbol;Acc:HGNC:188]     | -                                                      | 1932 1536        | 1800 1000             | 600    |  |
| 758                      | 5.85166567                                             | 4.501542513      | 6.926646933           |        |  |
| 3.436811739              | 2.281089419                                            | 2.179936902      |                       |        |  |
| ENSG00000121152          | 1729.220341                                            | 1287.667948      | 1615.863393           |        |  |
| 931.3356769              | 460.0212068                                            | 436.4953569      | 1544.250561           |        |  |
| 609.2840802              | 1.342013532                                            | 1.16E-07         | 6.26E-06              | NCAPH  |  |
| 2                        | 96335787                                               | 96373845         | + 3278                |        |  |
| protein_coding           | non-SMC condensin I complex subunit H [Source:HGNC     |                  |                       |        |  |
| Symbol;Acc:HGNC:1112]    | -                                                      | 1906 1455        | 1390 899              | 403    |  |
| 506                      | 28.47361645                                            | 21.03199573      | 26.38230262           |        |  |
| 15.23922166              | 7.556896204                                            | 7.177489829      |                       |        |  |
| ENSG00000108387          | 40.82629347                                            | 29.20484005      | 49.98714095           | 0      |  |
| 0                        | 0 40.00609149                                          | 0                | 7.753743451           |        |  |
| 1.17E-07                 | 6.28E-06                                               | 4-Sep 17         | 58520250              |        |  |
| 58540818                 | - 8012                                                 | protein_coding   | septin 4 [Source:HGNC |        |  |
| Symbol;Acc:HGNC:9165]    | -                                                      | 45 33            | 43 0 0                |        |  |
| 0                        | 0.275042785                                            | 0.195163878      | 0.333913795           | 0      |  |
| 0                        | 0                                                      |                  |                       |        |  |
| ENSG00000000971          | 555.2375912                                            | 341.6081291      | 463.8341683           |        |  |
| 180.2585181              | 186.063168                                             | 146.6486377      | 453.5599629           |        |  |
| 170.9901079              | 1.408953368                                            | 1.22E-07         | 6.55E-06              | CFH    |  |
| 1                        | 196651878                                              | 196747504        | + 8145                |        |  |
| protein_coding           | complement factor H [Source:HGNC Symbol;Acc:HGNC:4883] |                  |                       |        |  |
| -                        | 612 386                                                | 399 174          | 163 170               |        |  |
| 3.679501777              | 2.245549624                                            | 3.047815362      | 1.187053255           |        |  |
| 1.230109793              | 0.970485053                                            |                  |                       |        |  |
| ENSG00000117122          | 752.1110508                                            | 752.2458802      | 1181.091516           |        |  |
| 370.8767212              | 393.8146807                                            | 426.1436884      | 895.1494824           |        |  |

|                        |                                                   |             |             |         |
|------------------------|---------------------------------------------------|-------------|-------------|---------|
| 396.9450301            | 1.171413191                                       | 1.25E-07    | 6.66E-06    | MFAP2   |
| 1                      | 16974502                                          | 16980835    | - 2915      |         |
| protein_coding         | microfibril associated protein 2 [Source:HGNC     |             |             |         |
| Symbol;Acc:HGNC:7033]  | -                                                 | 829 850     | 1016 358    | 345     |
| 494                    | 13.92658567                                       | 13.81677888 | 21.68512827 |         |
| 6.824274871            | 7.274914544                                       | 7.879876446 |             |         |
| ENSG00000173706        | 2147.463036                                       | 1798.310151 | 2059.935204 |         |
| 1079.479172            | 1273.90488                                        | 1027.403103 | 2001.902797 |         |
| 1126.929052            | 0.829534143                                       | 1.25E-07    | 6.68E-06    | HEG1    |
| 3                      | 124965710                                         | 125055958   | - 9925      |         |
| protein_coding         | heart development protein with EGF like domains 1 |             |             |         |
| [Source:HGNC           | Symbol;Acc:HGNC:29227]                            | -           | 2367 2032   | 1772    |
| 1042                   | 1116 1191                                         | 11.67875173 | 9.701069792 |         |
| 11.10810685            | 5.833769253                                       | 6.911638886 | 5.57971818  |         |
| ENSG00000145632        | 510.7822938                                       | 528.3421064 | 441.746827  |         |
| 203.049825             | 126.7055929                                       | 228.599347  | 493.6237424 |         |
| 186.118255             | 1.404169425                                       | 1.27E-07    | 6.76E-06    | PLK2    |
| 5                      | 58453982                                          | 58460260    | - 4768      |         |
| protein_coding         | polo like kinase 2 [Source:HGNC                   |             |             |         |
| Symbol;Acc:HGNC:19699] | -                                                 | 563 597     | 380 196     | 111 265 |
| 5.782302816            | 5.932865806                                       | 4.958544287 | 2.284188119 |         |
| 1.430981741            | 2.584286419                                       |             |             |         |
| ENSG00000157613        | 1585.874689                                       | 1593.876271 | 2243.608884 |         |
| 935.4795509            | 1026.201154                                       | 770.3366674 | 1807.786615 |         |
| 910.6724573            | 0.989368153                                       | 1.28E-07    | 6.80E-06    |         |
| CREB3L1 11             | 46277661                                          | 46321422    | + 4037      |         |
| protein_coding         | cAMP responsive element binding protein 3 like 1  |             |             |         |
| [Source:HGNC           | Symbol;Acc:HGNC:18856]                            | TF_bZIP     | 1748 1801   | 1930    |
| 903                    | 899 893                                           | 21.20368591 | 21.1388523  |         |
| 29.74441324            | 12.42913899                                       | 13.68826179 | 10.28546019 |         |
| ENSG00000092969        | 311.1870813                                       | 276.1184878 | 270.8605544 |         |
| 95.30910153            | 41.09370581                                       | 13.80222472 | 286.0553745 |         |
| 50.06834402            | 2.520528928                                       | 1.36E-07    | 7.19E-06    | TGFB2   |
| 1                      | 218346235                                         | 218444619   | + 5151      |         |
| protein_coding         | transforming growth factor beta 2 [Source:HGNC    |             |             |         |
| Symbol;Acc:HGNC:11768] | -                                                 | 343 312     | 233 92      | 36      |
| 16                     | 3.260853244                                       | 2.870050147 | 2.81430536  |         |
| 0.99244928             | 0.429594103                                       | 0.144430678 |             |         |
| ENSG00000166803        | 805.6388578                                       | 762.865822  | 1067.167335 |         |
| 493.1210036            | 312.7687609                                       | 299.3357487 | 878.5573381 |         |
| 368.4085044            | 1.253573868                                       | 1.37E-07    | 7.19E-06    | PCLAF   |
| 15                     | 64364311                                          | 64387687    | - 3734      |         |
| protein_coding         | PCNA clamp associated factor [Source:HGNC         |             |             |         |
| Symbol;Acc:HGNC:28961] | -                                                 | 888 862     | 918 476     | 274     |
| 347                    | 11.64574659                                       | 10.93854085 | 15.29590629 |         |
| 7.083447554            | 4.510488807                                       | 4.321019033 |             |         |
| ENSG00000168385        | 6661.943843                                       | 5354.220676 | 6612.252505 |         |
| 4160.449476            | 3451.871288                                       | 3055.467498 | 6209.472341 |         |
| 3555.929421            | 0.804324279                                       | 1.42E-07    | 7.46E-06    | 2-Sep   |
| 2                      | 241315100                                         | 241354027   | + 7378      |         |

|                                     |                                                  |              |             |             |             |                |             |
|-------------------------------------|--------------------------------------------------|--------------|-------------|-------------|-------------|----------------|-------------|
| protein_coding                      | septin 2 [Source:HGNC Symbol;Acc:HGNC:7729]      |              |             |             |             |                | -           |
|                                     | 7343                                             | 6050         | 5688        | 4016        | 3024        | 3542           | 48.73753509 |
|                                     | 38.85466462                                      |              | 47.96536829 |             | 30.24594074 |                | 25.19361545 |
|                                     | 22.32240195                                      |              |             |             |             |                |             |
| ENSG00000198712                     | 36848.90523                                      |              | 37926.46729 |             | 30131.78357 |                |             |
|                                     | 46783.30126                                      | 73794.02222  | 75779.38957 |             | 34969.05203 |                |             |
|                                     | 65452.23768                                      | -0.904344816 | 1.43E-07    |             | 7.49E-06    |                | MT-C02      |
|                                     | MT                                               | 7586         | 8269        | +           | 684         | protein_coding |             |
| mitochondrially                     | encoded cytochrome c oxidase II [Source:HGNC     |              |             |             |             |                |             |
| Symbol;Acc:HGNC:7421]               | -                                                | 40616        | 42855       | 25920       | 45159       | 64647          |             |
|                                     | 87846                                            | 2907.834817  | 2968.737775 | 2357.684792 |             |                |             |
|                                     | 3668.599126                                      | 5809.511749  | 5971.685225 |             |             |                |             |
| ENSG00000124496                     | 956.2425181                                      | 738.9709529  | 863.7312959 |             |             |                |             |
|                                     | 464.1138857                                      | 407.5125827  | 315.7258906 | 852.981589  |             |                |             |
|                                     | 395.7841196                                      | 1.109118941  | 1.45E-07    | 7.57E-06    |             | TRERF1         |             |
|                                     | 6                                                | 42224931     | 42452051    | -           | 7732        |                |             |
| protein_coding                      | transcriptional regulating factor 1 [Source:HGNC |              |             |             |             |                |             |
| Symbol;Acc:HGNC:18273]              | zf-C2H2                                          | 1054         | 835         | 743         | 448         | 357            |             |
|                                     | 366                                              | 6.675402377  | 5.117066617 | 5.978659432 |             |                |             |
|                                     | 3.219572523                                      | 2.838074104  | 2.201001093 |             |             |                |             |
| ENSG00000204525                     | 1683.857793                                      | 2191.247999  | 3418.887942 |             |             |                |             |
|                                     | 910.616307                                       | 1293.310241  | 987.7217068 | 2431.331245 |             |                |             |
|                                     | 1063.882752                                      | 1.19226346   | 1.47E-07    | 7.67E-06    |             | HLA-C          |             |
|                                     | 6                                                | 31268749     | 31272130    | -           | 2507        |                |             |
| protein_coding                      | "major histocompatibility complex, class I, C    |              |             |             |             |                |             |
| [Source:HGNC Symbol;Acc:HGNC:4933]" | -                                                | 1856         | 2476        | 2941        |             |                |             |
|                                     | 879                                              | 1133         | 1145        | 36.25369873 | 46.79751016 |                |             |
|                                     | 72.98734016                                      | 19.48258523  | 27.77940479 | 21.23646229 |             |                |             |
| ENSG00000145040                     | 177.8211893                                      | 217.7088077  | 189.4861389 |             |             |                |             |
|                                     | 41.4387398                                       | 41.09370581  | 6.038473317 | 195.0053786 |             |                |             |
|                                     | 29.52363964                                      | 2.737911513  | 1.51E-07    | 7.82E-06    |             | UCN2           |             |
|                                     | 3                                                | 48561727     | 48563773    | -           | 1481        |                |             |
| protein_coding                      | urocortin 2 [Source:HGNC Symbol;Acc:HGNC:18414]  |              |             |             |             |                | -           |
|                                     | 196                                              | 246          | 163         | 40          | 36          | 7              | 6.480816075 |
|                                     | 7.870575501                                      | 6.847615913  | 1.500779803 | 1.494152076 |             |                |             |
|                                     | 0.21977283                                       |              |             |             |             |                |             |
| ENSG00000114346                     | 3623.560358                                      | 2416.921763  | 2978.303607 |             |             |                |             |
|                                     | 1893.750409                                      | 1285.319799  | 1105.040617 | 3006.261909 |             |                |             |
|                                     | 1428.036941                                      | 1.074245438  | 1.57E-07    | 8.10E-06    |             | ECT2           |             |
|                                     | 3                                                | 172750682    | 172821474   | +           | 5499        |                |             |
| protein_coding                      | epithelial cell transforming 2 [Source:HGNC      |              |             |             |             |                |             |
| Symbol;Acc:HGNC:3155]               | -                                                | 3994         | 2731        | 2562        | 1828        | 1126           |             |
|                                     | 1281                                             | 35.56747414  | 23.53230244 | 28.98693204 |             |                |             |
|                                     | 18.4716                                          | 12.58641453  | 10.83169514 |             |             |                |             |
| ENSG00000075275                     | 843.7433984                                      | 772.6007687  | 820.7191048 |             |             |                |             |
|                                     | 468.2577597                                      | 382.3997624  | 344.1929791 | 812.354424  |             |                |             |
|                                     | 398.2835004                                      | 1.029066872  | 1.60E-07    | 8.26E-06    |             | CELSR1         |             |
|                                     | 22                                               | 46360834     | 46537170    | -           | 12806       |                |             |
| protein_coding                      | cadherin EGF LAG seven-pass G-type receptor 1    |              |             |             |             |                |             |
| [Source:HGNC Symbol;Acc:HGNC:1850]  | -                                                | 930          | 873         | 706         |             |                |             |

|                        |                                                        |      |             |             |           |
|------------------------|--------------------------------------------------------|------|-------------|-------------|-----------|
| 452                    | 335                                                    | 399  | 3.556297911 | 3.230183445 |           |
| 3.43003104             | 1.961268174                                            |      | 1.607972695 | 1.448739884 |           |
| ENSG00000070614        | 3629.003864                                            |      | 2969.158739 | 3576.986807 |           |
| 2249.087602            | 1830.952892                                            |      | 1743.393511 | 3391.71647  |           |
| 1941.144668            | 0.805137754                                            |      | 1.63E-07    | 8.36E-06    | NDST1     |
| 5                      | 150485818                                              |      | 150558211   | + 9529      |           |
| protein_coding         | N-deacetylase and N-sulfotransferase 1 [Source:HGNC    |      |             |             |           |
| Symbol;Acc:HGNC:7680]  | -                                                      | 4000 | 3355        | 3077        | 2171 1604 |
| 2021                   | 20.55612964                                            |      | 16.68290353 | 20.09032748 |           |
| 12.65973282            | 10.34676052                                            |      | 9.861659532 |             |           |
| ENSG00000150990        | 1997.766627                                            |      | 2204.522926 | 1918.111222 |           |
| 2985.661202            | 3652.77385                                             |      | 3661.902747 | 2040.133592 |           |
| 3433.445933            | -0.750770812                                           |      | 1.64E-07    | 8.43E-06    | DHX37     |
| 12                     | 124946825                                              |      | 124989122   | - 6618      |           |
| protein_coding         | DEAH-box helicase 37 [Source:HGNC                      |      |             |             |           |
| Symbol;Acc:HGNC:17210] | -                                                      | 2202 | 2491        | 1650        | 2882 3200 |
| 4245                   | 16.29368197                                            |      | 17.83501199 | 15.51186541 |           |
| 24.19798802            | 29.72148986                                            |      | 29.82510284 |             |           |
| ENSG00000113140        | 8515.457567                                            |      | 8862.341463 | 14675.29459 |           |
| 5596.301809            | 5906.078719                                            |      | 4676.366264 | 10684.36454 |           |
| 5392.915598            | 0.986304079                                            |      | 1.74E-07    | 8.88E-06    | SPARC     |
| 5                      | 151661096                                              |      | 151687165   | - 4831      |           |
| protein_coding         | secreted protein acidic and cysteine rich [Source:HGNC |      |             |             |           |
| Symbol;Acc:HGNC:11219] | -                                                      | 9386 | 10014       | 12624       | 5402 5174 |
| 5421                   | 95.14198234                                            |      | 98.21933523 | 162.5798786 |           |
| 62.13403905            | 65.83195419                                            |      | 52.17631314 |             |           |
| ENSG00000100234        | 7374.135851                                            |      | 7012.701593 | 5734.571309 |           |
| 4559.297346            | 2442.792512                                            |      | 2386.059599 | 6707.136251 |           |
| 3129.383153            | 1.099990063                                            |      | 1.83E-07    | 9.35E-06    | TIMP3     |
| 22                     | 32801701                                               |      | 32863043    | + 4603      |           |
| protein_coding         | TIMP metalloproteinase inhibitor 3 [Source:HGNC        |      |             |             |           |
| Symbol;Acc:HGNC:11822] | -                                                      | 8128 | 7924        | 4933        | 4401 2140 |
| 2766                   | 86.47118361                                            |      | 81.56990055 | 66.67714367 |           |
| 53.12787401            | 28.57723187                                            |      | 27.94101761 |             |           |
| ENSG00000130770        | 833.7636377                                            |      | 1030.134358 | 926.505845  |           |
| 485.8692241            | 406.3710908                                            |      | 515.8581491 | 930.1346136 |           |
| 469.3661547            | 0.985576989                                            |      | 1.87E-07    | 9.50E-06    |           |
| ATP5IF1 1              | 28236109                                               |      | 28246906    | + 2225      |           |
| protein_coding         | ATP synthase inhibitory factor subunit 1 [Source:HGNC  |      |             |             |           |
| Symbol;Acc:HGNC:871]   | -                                                      | 919  | 1164        | 797         | 469 356   |
| 598                    | 20.22619452                                            |      | 24.78845196 | 22.28615531 |           |
| 11.71264205            | 9.834840995                                            |      | 12.4968969  |             |           |
| ENSG00000128567        | 2375.183029                                            |      | 1819.550035 | 1760.012358 |           |
| 1226.586698            | 788.7708533                                            |      | 954.9414231 | 1984.915141 |           |
| 990.0996581            | 1.003406015                                            |      | 1.88E-07    | 9.51E-06    | PODXL     |
| 7                      | 131500262                                              |      | 131558217   | - 6874      |           |
| protein_coding         | podocalyxin like [Source:HGNC Symbol;Acc:HGNC:9171]    |      |             |             |           |
| -                      | 2618                                                   | 2056 | 1514        | 1184        | 691 1107  |
| 18.6504278             | 14.17228977                                            |      | 13.70323779 | 9.570931726 |           |
| 6.178967057            | 7.488056475                                            |      |             |             |           |



|                        |                                                      |             |             |             |  |
|------------------------|------------------------------------------------------|-------------|-------------|-------------|--|
| ENSG00000149503        | 2582.9435                                            | 2323.112277 | 2534.231797 |             |  |
| 1409.953122            | 1189.434485                                          | 1626.0746   | 2480.095858 |             |  |
| 1408.487402            | 0.815343842                                          | 1.89E-07    | 9.54E-06    | INCENP      |  |
| 11                     | 62123973                                             | 62153163    | + 4473      |             |  |
| protein_coding         | inner centromere protein [Source:HGNC                |             |             |             |  |
| Symbol;Acc:HGNC:6058]  | -                                                    | 2847 2625   | 2180 1361   | 1042        |  |
| 1885                   | 31.16859692                                          | 27.80717374 | 30.32246071 |             |  |
| 16.90718367            | 14.31911513                                          | 19.59491909 |             |             |  |
| ENSG00000128487        | 901.8074602                                          | 666.4013503 | 780.0318971 |             |  |
| 439.2506418            | 222.5909065                                          | 215.6597613 | 782.7469025 |             |  |
| 292.5004366            | 1.420705961                                          | 1.95E-07    | 9.81E-06    | SPECC1      |  |
| 17                     | 20009344                                             | 20319026    | + 13676     |             |  |
| protein_coding         | sperm antigen with calponin homology and coiled-coil |             |             |             |  |
| domains 1 [Source:HGNC | Symbol;Acc:HGNC:30615]                               | -           | 994 753     |             |  |
| 671                    | 424 195                                              | 250         | 3.559229365 | 2.608929388 |  |
| 3.052602634            | 1.722736313                                          | 0.876441391 | 0.849986317 |             |  |
| ENSG00000113552        | 1289.203623                                          | 1293.862914 | 1109.017034 |             |  |
| 1908.253968            | 2185.956851                                          | 2254.938464 | 1230.694524 |             |  |
| 2116.383094            | -0.781615943                                         | 1.97E-07    | 9.91E-06    | GNPDA1      |  |
| 5                      | 141991749                                            | 142013041   | - 3961      |             |  |
| protein_coding         | glucosamine-6-phosphate deaminase 1 [Source:HGNC     |             |             |             |  |
| Symbol;Acc:HGNC:4417]  | -                                                    | 1421 1462   | 954 1842    | 1915        |  |
| 2614                   | 17.56782186                                          | 17.48916081 | 14.98478027 |             |  |
| 25.8402569             | 29.71743326                                          | 30.68539788 |             |             |  |
| ENSG00000183856        | 1894.340017                                          | 1524.846649 | 1477.526887 |             |  |
| 969.6665112            | 513.6713227                                          | 354.5446476 | 1632.237851 |             |  |
| 612.6274938            | 1.414717532                                          | 1.98E-07    | 9.91E-06    | IQGAP3      |  |
| 1                      | 156525405                                            | 156572604   | - 6742      |             |  |
| protein_coding         | IQ motif containing GTPase activating protein 3      |             |             |             |  |
| [Source:HGNC           | Symbol;Acc:HGNC:20669]                               | -           | 2088 1723   | 1271        |  |
| 936                    | 450 411                                              | 15.16597828 | 12.10940962 |             |  |
| 11.72907191            | 7.714346541                                          | 4.102712889 | 2.834549802 |             |  |
| ENSG00000075239        | 1424.384017                                          | 1392.982371 | 1691.425351 |             |  |
| 896.1127481            | 832.1475427                                          | 653.0177573 | 1502.930579 |             |  |
| 793.7593494            | 0.921473599                                          | 2.09E-07    | 1.05E-05    | ACAT1       |  |
| 11                     | 108121516                                            | 108147776   | + 5584      |             |  |
| protein_coding         | acetyl-CoA acetyltransferase 1 [Source:HGNC          |             |             |             |  |
| Symbol;Acc:HGNC:93]    | -                                                    | 1570 1574   | 1455 865    | 729         |  |
| 757                    | 13.76838262                                          | 13.35628751 | 16.2115459  |             |  |
| 8.607613172            | 8.024712443                                          | 6.303496093 |             |             |  |
| ENSG00000108175        | 2160.16455                                           | 1792.115185 | 2430.77004  |             |  |
| 1188.255864            | 1118.661992                                          | 1273.255231 | 2127.683258 |             |  |
| 1193.391029            | 0.833335992                                          | 2.11E-07    | 1.05E-05    | ZMIZ1       |  |
| 10                     | 79069035                                             | 79316528    | + 11048     |             |  |
| protein_coding         | zinc finger MIZ-type containing 1 [Source:HGNC       |             |             |             |  |
| Symbol;Acc:HGNC:16493] | zf-MIZ                                               | 2381 2025   | 2091 1147   | 980         |  |
| 1476                   | 10.55369195                                          | 8.684959605 | 11.7754419  |             |  |
| 5.768883863            | 5.452425878                                          | 6.212032369 |             |             |  |
| ENSG00000129474        | 684.0672283                                          | 664.63136   | 732.3697394 |             |  |
| 355.3371938            | 367.5603687                                          | 288.9840802 | 693.6894426 |             |  |

|                        |                                                       |             |             |        |
|------------------------|-------------------------------------------------------|-------------|-------------|--------|
| 337.2938809            | 1.041563223                                           | 2.11E-07    | 1.05E-05    | AJUBA  |
| 14                     | 22971174                                              | 22982642    | - 5979      |        |
| protein_coding         | ajuba LIM protein [Source:HGNC Symbol;Acc:HGNC:20250] |             |             |        |
| -                      | 754 751                                               | 630 343     | 322 335     |        |
| 6.175490757            | 5.95165604                                            | 6.555696548 | 3.187701232 |        |
| 3.310355829            | 2.605237206                                           |             |             |        |
| ENSG00000119326        | 1696.559306                                           | 1392.982371 | 1515.889111 |        |
| 959.3068263            | 688.3195724                                           | 542.5999595 | 1535.143596 |        |
| 730.0754527            | 1.073086172                                           | 2.13E-07    | 1.06E-05    |        |
| CTNNAL1 9              | 108942569                                             | 109013529   | - 3131      |        |
| protein_coding         | catenin alpha like 1 [Source:HGNC                     |             |             |        |
| Symbol;Acc:HGNC:2512]  | -                                                     | 1870 1574   | 1304 926    | 603    |
| 629                    | 29.24739715                                           | 23.82034796 | 25.91202598 |        |
| 16.43387437            | 11.83808911                                           | 9.341112358 |             |        |
| ENSG00000168036        | 11207.27118                                           | 9522.547848 | 11663.27872 |        |
| 7554.282265            | 5524.820448                                           | 4935.157978 | 10797.69925 |        |
| 6004.753564            | 0.846586752                                           | 2.14E-07    | 1.06E-05    | CTNNB1 |
| 3                      | 41194741                                              | 41260096    | + 11927     |        |
| protein_coding         | catenin beta 1 [Source:HGNC Symbol;Acc:HGNC:2514]     |             |             |        |
| -                      | 12353 10760                                           | 10033 7292  | 4840 5721   |        |
| 50.71890932            | 42.74718226                                           | 52.33671255 | 33.97249821 |        |
| 24.94373607            | 22.30343458                                           |             |             |        |
| ENSG00000081803        | 449.0892282                                           | 398.2478189 | 490.5714763 |        |
| 181.2944866            | 166.6578069                                           | 70.73640171 | 445.9695078 |        |
| 139.5628984            | 1.680339311                                           | 2.17E-07    | 1.07E-05    | CADPS2 |
| 7                      | 122318425                                             | 122886759   | - 6351      |        |
| protein_coding         | calcium dependent secretion activator 2 [Source:HGNC  |             |             |        |
| Symbol;Acc:HGNC:16018] | -                                                     | 495 450     | 422 175     | 146    |
| 82                     | 3.816732911                                           | 3.357351728 | 4.134063896 |        |
| 1.531115594            | 1.413051867                                           | 0.600347571 |             |        |
| ENSG00000143815        | 2440.505098                                           | 1881.499696 | 2087.835003 |        |
| 1252.48591             | 1275.046372                                           | 980.8205945 | 2136.613266 |        |
| 1169.450959            | 0.87028244                                            | 2.20E-07    | 1.08E-05    | LBR    |
| 1                      | 225401502                                             | 225428925   | - 5257      |        |
| protein_coding         | lamin B receptor [Source:HGNC Symbol;Acc:HGNC:6518]   |             |             |        |
| -                      | 2690 2126                                             | 1796 1209   | 1117 1137   |        |
| 25.05780277            | 19.16248042                                           | 21.25568972 | 12.77910291 |        |
| 13.06058278            | 10.05665394                                           |             |             |        |
| ENSG00000137834        | 434.5732127                                           | 362.8480128 | 323.1726787 |        |
| 151.2514003            | 155.2428886                                           | 100.0661293 | 373.5313014 |        |
| 135.5201394            | 1.467115802                                           | 2.22E-07    | 1.09E-05    | SMAD6  |
| 15                     | 66702228                                              | 66782848    | + 8563      |        |
| protein_coding         | SMAD family member 6 [Source:HGNC                     |             |             |        |
| Symbol;Acc:HGNC:6772]  | MH1                                                   | 479 410     | 278 146     | 136    |
| 116                    | 2.739291519                                           | 2.268738043 | 2.019880602 |        |
| 0.947412162            | 0.976248376                                           | 0.629887606 |             |        |
| ENSG00000168398        | 78.02358307                                           | 97.34946684 | 198.7860721 |        |
| 25.89921237            | 12.55641011                                           | 7.763751407 | 124.7197073 |        |
| 15.40645796            | 3.022290111                                           | 2.26E-07    | 1.10E-05    | BDKRB2 |
| 14                     | 96204679                                              | 96244166    | + 6845      |        |

|                                         |                                                    |             |                      |             |                |        |   |
|-----------------------------------------|----------------------------------------------------|-------------|----------------------|-------------|----------------|--------|---|
| protein_coding                          | bradykinin receptor B2 [Source:HGNC                |             |                      |             |                |        |   |
| Symbol;Acc:HGNC:1030]                   | -                                                  | 86          | 110                  | 171         | 25             | 11     |   |
| 9                                       | 0.615252918                                        | 0.761457509 | 1.55428088           |             |                |        |   |
| 0.202945114                             | 0.098779448                                        | 0.06113643  |                      |             |                |        |   |
| ENSG00000163507                         | 1823.574442                                        | 1369.972497 | 1253.165999          |             |                |        |   |
| 888.8609686                             | 566.1799468                                        | 643.5287278 | 1482.237646          |             |                |        |   |
| 699.5232144                             | 1.083594615                                        | 2.28E-07    | 1.11E-05             |             |                | CIP2A  |   |
| 3                                       | 108549869                                          | 108589644   | -                    | 4579        |                |        |   |
| protein_coding                          | cell proliferation regulating inhibitor of protein |             |                      |             |                |        |   |
| phosphatase 2A [Source:HGNC             | Symbol;Acc:HGNC:29302]                             |             |                      |             |                |        | - |
| 1548                                    | 1078                                               | 858         | 496                  | 746         | 21.49582399    | 2010   |   |
| 16.01868103                             | 14.64721188                                        | 10.41186882 | 6.658223867          |             |                |        |   |
| 7.575288932                             |                                                    |             |                      |             |                |        |   |
| ENSG00000171310                         | 492.6372745                                        | 405.3277801 | 496.3839345          |             |                |        |   |
| 184.4023921                             | 183.7801843                                        | 226.0114299 | 464.7829964          |             |                |        |   |
| 198.0646688                             | 1.228195862                                        | 2.32E-07    | 1.13E-05             |             |                | CHST11 |   |
| 12                                      | 104455295                                          | 104762014   | +                    | 6492        |                |        |   |
| protein_coding                          | carbohydrate sulfotransferase 11 [Source:HGNC      |             |                      |             |                |        |   |
| Symbol;Acc:HGNC:17422]                  | -                                                  | 543         | 458                  | 427         | 178            | 161    |   |
| 262                                     | 4.095906197                                        | 3.3428232   | 4.092193964          |             |                |        |   |
| 1.523538856                             | 1.524385205                                        | 1.876522596 |                      |             |                |        |   |
| ENSG00000236509                         | 0                                                  | 0           | 0                    | 18.64743291 | 55.93309958    |        |   |
| 40.54403513                             | 0                                                  | 38.37485587 | -7.737154907         |             |                |        |   |
| 2.34E-07                                | 1.13E-05                                           | RPL21P133   | X                    | 134607157   |                |        |   |
| 134607632                               | +                                                  | 476         | processed_pseudogene |             |                |        |   |
| ribosomal protein L21 pseudogene        | 133 [Source:HGNC                                   |             |                      |             |                |        |   |
| Symbol;Acc:HGNC:36003]                  | -                                                  | 0           | 0                    | 0           | 18             | 49     |   |
| 47                                      | 0                                                  | 0           | 2.101249369          | 6.32756314  |                |        |   |
| 4.591154665                             |                                                    |             |                      |             |                |        |   |
| ENSG00000101665                         | 937.1902479                                        | 1051.374242 | 1291.528223          |             |                |        |   |
| 620.5451284                             | 495.4074534                                        | 540.8746814 | 1093.364238          |             |                |        |   |
| 552.2757544                             | 0.984277231                                        | 2.46E-07    | 1.19E-05             |             |                | SMAD7  |   |
| 18                                      | 48919853                                           | 48952052    | -                    | 5033        |                |        |   |
| protein_coding                          | SMAD family member 7 [Source:HGNC                  |             |                      |             |                |        |   |
| Symbol;Acc:HGNC:6773]                   | MH1                                                | 1033        | 1188                 | 1111        | 599            | 434    |   |
| 627                                     | 10.05083341                                        | 11.18448396 | 13.73390298          |             |                |        |   |
| 6.613204242                             | 5.300418478                                        | 5.792574506 |                      |             |                |        |   |
| ENSG00000060656                         | 1232.954063                                        | 1038.099315 | 1508.914162          |             |                |        |   |
| 594.6459161                             | 728.2717864                                        | 577.1055213 | 1259.98918           |             |                |        |   |
| 633.3410746                             | 0.992443135                                        | 2.52E-07    | 1.21E-05             |             |                | PTPRU  |   |
| 1                                       | 29236516                                           | 29326813    | +                    | 6682        |                |        |   |
| protein_coding                          | "protein tyrosine phosphatase, receptor type U     |             |                      |             |                |        |   |
| [Source:HGNC                            | Symbol;Acc:HGNC:9683]"                             |             |                      |             |                |        | - |
| 574                                     | 638                                                | 669         | 9.959594782          | 8.317982104 |                | 1298   |   |
| 12.08579067                             | 4.773286089                                        | 5.868965649 | 4.655332064          |             |                |        |   |
| ENSG00000108963                         | 815.6186184                                        | 758.4408462 | 575.4333667          |             |                |        |   |
| 1128.169691                             | 1633.474806                                        | 1658.854884 | 716.4976104          |             |                |        |   |
| 1473.499794                             | -1.039169382                                       | 2.52E-07    | 1.21E-05             |             |                | DPH1   |   |
| 17                                      | 2030110                                            | 2043430     | +                    | 5757        | protein_coding |        |   |
| diphthamide biosynthesis 1 [Source:HGNC | Symbol;Acc:HGNC:3003]                              |             |                      |             |                |        | - |

|                                       |                                                                   |             |             |             |                |             |             |       |  |
|---------------------------------------|-------------------------------------------------------------------|-------------|-------------|-------------|----------------|-------------|-------------|-------|--|
|                                       | 899                                                               | 857         | 495         | 1089        | 1431           | 1923        | 7.647018588 |       |  |
|                                       | 7.053603338                                                       |             | 5.349532325 |             | 10.51099172    |             | 15.27885342 |       |  |
|                                       | 15.53152403                                                       |             |             |             |                |             |             |       |  |
| ENSG00000167004                       | 5004.396328                                                       |             | 4227.621846 |             | 6239.092685    |             |             |       |  |
| 3297.487719                           | 2220.201606                                                       |             | 1582.942648 |             | 5157.036953    |             |             |       |  |
| 2366.877324                           | 1.123701267                                                       |             | 2.55E-07    |             | 1.22E-05       |             |             | PDIA3 |  |
| 15                                    | 43746392                                                          |             | 43773279    |             | +              | 4240        |             |       |  |
| protein_coding                        | protein disulfide isomerase family A member 3                     |             |             |             |                |             |             |       |  |
| [Source:HGNC Symbol;Acc:HGNC:4606]    |                                                                   |             | -           |             | 5516           | 4777        |             | 5367  |  |
| 3183                                  | 1945                                                              | 1835        | 63.70698974 |             | 53.38457941    |             |             |       |  |
| 78.75399347                           | 41.71409498                                                       |             | 28.19688345 |             | 20.12339399    |             |             |       |  |
| ENSG00000258791                       | 40.82629347                                                       |             | 70.79961225 |             | 12.78740815    |             |             |       |  |
| 270.3877772                           | 181.4972007                                                       |             | 226.8740689 |             | 41.47110462    |             |             |       |  |
| 226.2530156                           | -2.435311201                                                      |             | 2.62E-07    |             | 1.25E-05       |             |             |       |  |
| LINC00520                             | 14                                                                | 55781132    |             | 55796731    |                | -           |             | 3482  |  |
|                                       | lincRNA long intergenic non-protein coding RNA 520                |             |             |             |                |             |             |       |  |
| [Source:HGNC Symbol;Acc:HGNC:19843]   |                                                                   |             | -           |             | 45             | 80          |             | 11    |  |
| 261                                   | 159                                                               | 263         | 0.632866971 |             | 1.088648456    |             |             |       |  |
| 0.196548967                           | 4.165084189                                                       |             | 2.806827467 |             | 3.512028244    |             |             |       |  |
| ENSG00000224051                       | 1137.692711                                                       |             | 1621.311121 |             | 1271.765865    |             |             |       |  |
| 1873.031039                           | 3175.630266                                                       |             | 4012.1342   |             | 1343.589899    |             |             |       |  |
| 3020.265168                           | -1.168630009                                                      |             | 2.65E-07    |             | 1.26E-05       |             |             | CPTP  |  |
| 1                                     | 1324756                                                           | 1328897     | +           | 2556        | protein_coding |             |             |       |  |
| ceramide-1-phosphate transfer protein | [Source:HGNC Symbol;Acc:HGNC:28116]                               |             |             |             |                |             |             |       |  |
|                                       |                                                                   |             | -           | 1254        | 1832           | 1094        | 1808        | 2782  |  |
| 4651                                  | 24.02510921                                                       |             | 33.9618282  |             | 26.62951882    |             |             |       |  |
| 39.30516469                           | 66.90269867                                                       |             | 84.60898949 |             |                |             |             |       |  |
| ENSG00000138166                       | 995.2543097                                                       |             | 987.6545909 |             | 842.8064462    |             |             |       |  |
| 1438.960239                           | 1770.453825                                                       |             | 2028.927034 |             | 941.9051156    |             |             |       |  |
| 1746.1137                             | -0.89018887                                                       |             | 2.83E-07    |             | 1.34E-05       |             |             | DUSP5 |  |
| 10                                    | 110497838                                                         |             | 110511544   |             | +              | 2615        |             |       |  |
| protein_coding                        | dual specificity phosphatase 5 [Source:HGNC Symbol;Acc:HGNC:3071] |             |             |             |                |             |             |       |  |
|                                       |                                                                   |             | -           | 1097        | 1116           | 725         | 1389        | 1551  |  |
| 2352                                  | 20.54298826                                                       |             | 20.22175956 |             | 17.2493669     |             |             |       |  |
| 29.51498699                           | 36.45754872                                                       |             | 41.82121466 |             |                |             |             |       |  |
| ENSG00000071575                       | 1946.053322                                                       |             | 1727.510539 |             | 2777.192552    |             |             |       |  |
| 1073.263361                           | 1228.245207                                                       |             | 955.8040622 |             | 2150.252138    |             |             |       |  |
| 1085.770877                           | 0.985689601                                                       |             | 2.90E-07    |             | 1.38E-05       |             |             | TRIB2 |  |
| 2                                     | 12716889                                                          |             | 12742734    |             | +              | 4588        |             |       |  |
| protein_coding                        | tribbles pseudokinase 2 [Source:HGNC Symbol;Acc:HGNC:30809]       |             |             |             |                |             |             |       |  |
|                                       |                                                                   |             | -           | 2145        | 1952           | 2389        | 1036        | 1076  |  |
| 1108                                  | 22.8945742                                                        |             | 20.15964336 |             | 32.39661144    |             |             |       |  |
| 12.54724534                           | 14.41571615                                                       |             | 11.22916257 |             |                |             |             |       |  |
| ENSG00000179776                       | 331.1466026                                                       |             | 133.6342681 |             | 225.5233801    |             |             |       |  |
| 59.05020421                           | 63.92354238                                                       |             | 43.13195226 |             | 230.1014169    |             |             |       |  |
| 55.36856628                           | 2.058938659                                                       |             | 2.91E-07    |             | 1.38E-05       |             |             | CDH5  |  |
| 16                                    | 66366622                                                          |             | 66404786    |             | +              | 6082        |             |       |  |
| protein_coding                        | cadherin 5 [Source:HGNC Symbol;Acc:HGNC:1764]                     |             |             |             |                |             |             |       |  |
|                                       |                                                                   |             | -           |             |                |             |             |       |  |
| 365                                   | 151                                                               | 194         | 57          | 56          | 50             | 2.938834518 |             |       |  |
| 1.1764053                             |                                                                   | 1.984550528 |             | 0.520763436 |                | 0.565964214 |             |       |  |

|                                     |                                                      |             |             |             |      |             |
|-------------------------------------|------------------------------------------------------|-------------|-------------|-------------|------|-------------|
|                                     | 0.38225626                                           |             |             |             |      |             |
| ENSG00000186340                     | 1057.854626                                          | 906.2350368 | 1277.578323 |             |      |             |
| 639.1925614                         | 456.5967313                                          | 411.4788246 | 1080.555995 |             |      |             |
| 502.4227057                         | 1.104744549                                          | 2.94E-07    | 1.39E-05    |             |      | THBS2       |
| 6                                   | 169215780                                            | 169254044   | -           | 6412        |      |             |
| protein_coding                      | thrombospondin 2 [Source:HGNC Symbol;Acc:HGNC:11786] |             |             |             |      |             |
| -                                   | 1166                                                 | 1024        | 1099        | 617         | 400  | 477         |
| 8.904995827                         | 7.567159425                                          | 10.66377628 | 5.346920095 |             |      |             |
| 3.834544992                         | 3.459042384                                          |             |             |             |      |             |
| ENSG00000153044                     | 1252.006333                                          | 1208.903379 | 1311.290581 |             |      |             |
| 723.1060094                         | 741.9696883                                          | 708.2266562 | 1257.400098 |             |      |             |
| 724.434118                          | 0.795495655                                          | 3.02E-07    | 1.42E-05    |             |      | CENPH       |
| 5                                   | 69189548                                             | 69210357    | +           | 2244        |      |             |
| protein_coding                      | centromere protein H [Source:HGNC                    |             |             |             |      |             |
| Symbol;Acc:HGNC:17268]              | -                                                    | 1380        | 1366        | 1128        | 698  | 650         |
| 821                                 | 30.11514214                                          | 28.84392035 | 31.27469577 |             |      |             |
| 17.28401417                         | 17.80483135                                          | 17.0118413  |             |             |      |             |
| ENSG00000100526                     | 504.4315371                                          | 443.3825717 | 489.4089846 |             |      |             |
| 164.7189907                         | 239.7132839                                          | 106.1046026 | 479.0743645 |             |      |             |
| 170.1789591                         | 1.497916353                                          | 3.09E-07    | 1.45E-05    |             |      | CDKN3       |
| 14                                  | 54396849                                             | 54420218    | +           | 1836        |      |             |
| protein_coding                      | cyclin dependent kinase inhibitor 3 [Source:HGNC     |             |             |             |      |             |
| Symbol;Acc:HGNC:1791]               | -                                                    | 556         | 501         | 421         | 159  | 210         |
| 123                                 | 14.82964649                                          | 12.92979055 | 14.2664614  |             |      |             |
| 4.812120469                         | 7.030625711                                          | 3.115038744 |             |             |      |             |
| ENSG00000067445                     | 83.46708887                                          | 71.6846074  | 32.5497662  |             |      |             |
| 279.7114936                         | 204.3270372                                          | 245.8521279 | 62.56715416 |             |      |             |
| 243.2968863                         | -1.95106369                                          | 3.11E-07    | 1.45E-05    |             |      | TR0         |
| X                                   | 54920462                                             | 54931431    | +           | 6716        |      |             |
| protein_coding                      | trophinin [Source:HGNC Symbol;Acc:HGNC:12326]        |             |             |             |      | -           |
| 92                                  | 81                                                   | 28          | 270         | 179         | 285  | 0.670819724 |
|                                     | 0.571479653                                          | 0.259390574 | 2.233907161 | 1.638285939 |      |             |
|                                     | 1.973173121                                          |             |             |             |      |             |
| ENSG00000105426                     | 990.7180548                                          | 734.5459771 | 1156.679192 |             |      |             |
| 446.5024213                         | 454.3137476                                          | 487.3910606 | 960.6477412 |             |      |             |
| 462.7357432                         | 1.052488439                                          | 3.19E-07    | 1.49E-05    |             |      | PTPRS       |
| 19                                  | 5158495                                              | 5340803     | -           | 8565        |      |             |
| protein_coding                      | "protein tyrosine phosphatase, receptor type S       |             |             |             |      |             |
| [Source:HGNC Symbol;Acc:HGNC:9681]" | -                                                    |             | 1092        | 830         |      | 995         |
| 431                                 | 398                                                  | 565         | 6.243440175 | 4.5917387   |      |             |
| 7.227740642                         | 2.796159535                                          | 2.856295035 | 3.067270648 |             |      |             |
| ENSG00000168268                     | 9185.00878                                           | 9016.33062  | 11007.63343 |             |      |             |
| 6428.184511                         | 5593.309958                                          | 3938.809881 | 9736.324277 |             |      |             |
| 5320.10145                          | 0.872057539                                          | 3.28E-07    | 1.53E-05    |             |      | NT5DC2      |
| 3                                   | 52524385                                             | 52535054    | -           | 4719        |      |             |
| protein_coding                      | 5'-nucleotidase domain containing 2 [Source:HGNC     |             |             |             |      |             |
| Symbol;Acc:HGNC:25717]              | -                                                    | 10124       | 10188       | 9469        | 6205 | 4900        |
| 4566                                | 105.0584146                                          | 102.2975894 | 124.8420771 |             |      |             |
| 73.06406856                         | 63.8253879                                           | 44.99009891 |             |             |      |             |
| ENSG00000175264                     | 534.370819                                           | 406.2127753 | 504.5213761 |             |      |             |

|                                              |                                                       |                  |              |        |
|----------------------------------------------|-------------------------------------------------------|------------------|--------------|--------|
| 244.4885648                                  | 119.856642                                            | 158.7255843      | 481.7016568  |        |
| 174.3569304                                  | 1.465069354                                           | 3.30E-07         | 1.53E-05     | CHST1  |
| 11                                           | 45648877                                              | 45665622         | - 3478       |        |
| protein_coding                               | carbohydrate sul                                      | foftransferase 1 | [Source:HGNC |        |
| Symbol;Acc:HGNC:1969]                        | -                                                     | 589 459          | 434 236      | 105    |
| 184                                          | 8.293052231                                           | 6.253304095      | 7.763668772  |        |
| 3.770461139                                  | 1.855697068                                           | 2.459910258      |              |        |
| ENSG00000130522                              | 3120.943323                                           | 3910.793582      | 3759.497996  |        |
| 4808.965753                                  | 8394.530904                                           | 7557.580676      | 3597.0783    |        |
| 6920.359111                                  | -0.944054936                                          | 3.31E-07         | 1.53E-05     | JUND   |
| 19                                           | 18279760                                              | 18281622         | - 1863       |        |
| protein_coding                               | "JunD proto-oncogene, AP-1 transcription factor       |                  |              |        |
| subunit [Source:HGNC Symbol;Acc:HGNC:6206]"  |                                                       | TF_bZIP          | 3440 4419    |        |
| 3234                                         | 4642 7354                                             | 8761 90.42203383 | 112.3925662  |        |
| 108.0025494                                  | 138.4536231                                           | 242.6376163      | 218.6612586  |        |
| ENSG00000090530                              | 517.1330506                                           | 445.152562       | 631.2329659  |        |
| 244.4885648                                  | 188.3461516                                           | 94.02765594      | 531.1728595  |        |
| 175.6207908                                  | 1.599393117                                           | 3.39E-07         | 1.56E-05     | P3H2   |
| 3                                            | 189956728                                             | 190122437        | - 5605       |        |
| protein_coding                               | prolyl 3-hydroxylase 2 [Source:HGNC                   |                  |              |        |
| Symbol;Acc:HGNC:19317]                       | -                                                     | 570 503          | 543 236      | 165    |
| 109                                          | 4.979983712                                           | 4.252250187      | 6.02741451   |        |
| 2.339636724                                  | 1.809487917                                           | 0.90423622       |              |        |
| ENSG00000156113                              | 474.4922552                                           | 352.2280709      | 495.2214429  |        |
| 210.3016045                                  | 166.6578069                                           | 141.4728034      | 440.6472563  |        |
| 172.8107383                                  | 1.351122436                                           | 3.54E-07         | 1.63E-05     | KCNMA1 |
| 10                                           | 76869601                                              | 77638369         | - 35644      |        |
| protein_coding                               | potassium calcium-activated channel subfamily M alpha |                  |              |        |
| 1 [Source:HGNC Symbol;Acc:HGNC:6284]         | -                                                     | 523 398          | 426          |        |
| 203                                          | 146 164                                               | 0.718528398      | 0.529082111  |        |
| 0.743583956                                  | 0.316462057                                           | 0.251775682      | 0.213938246  |        |
| ENSG00000169045                              | 6544.001218                                           | 6568.434026      | 6141.443386  |        |
| 4591.412369                                  | 3595.699259                                           | 3715.386368      | 6417.959543  |        |
| 3967.499332                                  | 0.69395985                                            | 3.56E-07         | 1.64E-05     |        |
| HNRNPH1 5                                    | 179614178                                             | 179634784        | - 9480       |        |
| protein_coding                               | heterogeneous nuclear ribonucleoprotein H1            |                  |              |        |
| [Source:HGNC Symbol;Acc:HGNC:5041]           | -                                                     | 7213 7422        | 5283         |        |
| 4432                                         | 3150 4307                                             | 37.25943615      | 37.0970225   |        |
| 34.67201804                                  | 25.97786515                                           | 20.42441267      | 21.12504061  |        |
| ENSG00000069020                              | 361.0858845                                           | 340.723134       | 352.2349699  |        |
| 674.4154902                                  | 717.9983599                                           | 663.3694258      | 351.3479961  |        |
| 685.261092                                   | -0.96352682                                           | 3.63E-07         | 1.66E-05     | MAST4  |
| 5                                            | 66596361                                              | 67169595         | + 14675      |        |
| protein_coding                               | microtubule associated serine/threonine kinase family |                  |              |        |
| member 4 [Source:HGNC Symbol;Acc:HGNC:19037] | -                                                     | 398 385          |              |        |
| 303                                          | 651 629                                               | 769 1.328108774  | 1.24310857   |        |
| 1.284610197                                  | 2.464988641                                           | 2.634631595      | 2.436571993  |        |
| ENSG00000143977                              | 1019.750086                                           | 1584.141324      | 1374.06513   |        |
| 695.1348601                                  | 671.197195                                            | 669.4078991      | 1325.985513  |        |
| 678.5799847                                  | 0.966437886                                           | 3.64E-07         | 1.66E-05     | SNRPG  |

|                                               |                                                |                                     |   |                |             |
|-----------------------------------------------|------------------------------------------------|-------------------------------------|---|----------------|-------------|
| 2                                             | 70281362                                       | 70293771                            | - | 1795           |             |
| protein_coding                                | small nuclear ribonucleoprotein                | polypeptide G                       |   |                |             |
| [Source:HGNC Symbol;Acc:HGNC:11163]           |                                                |                                     | - | 1124 1790      | 1182        |
| 671                                           | 588 776                                        | 30.66412255                         |   | 47.2514368     |             |
| 40.96942514                                   | 20.77160766                                    | 20.13539869                         |   | 20.10149168    |             |
| ENSG00000122861                               | 4108.032374                                    | 4559.495029                         |   | 5245.162324    |             |
| 2681.086465                                   | 2192.805802                                    | 3080.484031                         |   | 4637.563242    |             |
| 2651.458766                                   | 0.805926348                                    | 3.82E-07                            |   | 1.74E-05       | PLAU        |
| 10                                            | 73909177                                       | 73917497                            |   | + 2950         |             |
| protein_coding                                | "plasminogen activator, urokinase              | [Source:HGNC                        |   |                |             |
| Symbol;Acc:HGNC:9052]"                        | -                                              | 4528 5152                           |   | 4512 2588      | 1921        |
| 3571                                          | 75.16455416                                    | 82.75233923                         |   | 95.15988787    |             |
| 48.74771907                                   | 40.02696939                                    | 56.28580119                         |   |                |             |
| ENSG00000064666                               | 4212.366235                                    | 4028.497937                         |   | 4746.453407    |             |
| 2962.869895                                   | 2526.121416                                    | 2510.279622                         |   | 4329.10586     |             |
| 2666.423644                                   | 0.699010502                                    | 3.84E-07                            |   | 1.75E-05       | CNN2        |
| 19                                            | 1026581 1039068                                | + 3645                              |   | protein_coding |             |
| calponin 2 [Source:HGNC Symbol;Acc:HGNC:2156] |                                                | -                                   |   | 4643           | 4552        |
| 4083                                          | 2860 2213                                      | 2910                                |   | 62.37776854    | 59.17403191 |
| 69.69292527                                   | 43.59940315                                    | 37.31910686                         |   | 37.12158186    |             |
| ENSG00000168077                               | 386.4889115                                    | 331.8731824                         |   | 670.757682     |             |
| 123.2802509                                   | 34.24475485                                    | 161.3135015                         |   | 463.0399253    |             |
| 106.2795024                                   | 2.116622737                                    | 3.91E-07                            |   | 1.77E-05       | SCARA3      |
| 8                                             | 27633868                                       | 27676776                            |   | + 4031         |             |
| protein_coding                                | scavenger receptor class A member 3            | [Source:HGNC                        |   |                |             |
| Symbol;Acc:HGNC:19000]"                       | -                                              | 426 375                             |   | 577 119        | 30          |
| 187                                           | 5.175180295                                    | 4.408033744                         |   | 8.905736918    |             |
| 1.640386577                                   | 0.457462835                                    | 2.157048085                         |   |                |             |
| ENSG00000029534                               | 224.0909886                                    | 195.5839288                         |   | 226.6858717    |             |
| 81.8415111                                    | 55.93309958                                    | 39.68139608                         |   | 215.4535964    |             |
| 59.15200225                                   | 1.868628009                                    | 3.99E-07                            |   | 1.81E-05       | ANK1        |
| 8                                             | 41653220                                       | 41896762                            |   | - 10797        |             |
| protein_coding                                | ankyrin 1 [Source:HGNC Symbol;Acc:HGNC:492]    |                                     |   |                | -           |
| 247                                           | 221 195                                        | 79 49                               |   | 46             | 1.12026956  |
| 0.969874661                                   | 1.123668889                                    | 0.406570659                         |   | 0.278958975    |             |
| 0.198100581                                   |                                                |                                     |   |                |             |
| ENSG00000144724                               | 2950.380141                                    | 2241.692723                         |   | 2987.60354     |             |
| 1735.247229                                   | 1437.138212                                    | 1124.881315                         |   | 2726.558801    |             |
| 1432.422252                                   | 0.928934968                                    | 4.08E-07                            |   | 1.84E-05       | PTPRG       |
| 3                                             | 61561569                                       | 62297613                            |   | + 14629        |             |
| protein_coding                                | "protein tyrosine phosphatase, receptor type G | [Source:HGNC Symbol;Acc:HGNC:9671]" |   |                |             |
|                                               |                                                | -                                   |   | 3252 2533      | 2570        |
| 1675                                          | 1259 1304                                      | 10.88590602                         |   | 8.204403112    |             |
| 10.93013007                                   | 6.362271751                                    | 5.290033842                         |   | 4.144708289    |             |
| ENSG00000163453                               | 585.1768731                                    | 371.6979643                         |   | 767.2444889    |             |
| 7.251779464                                   | 35.38624667                                    | 1.725278091                         |   | 574.7064421    |             |
| 14.78776808                                   | 5.292256116                                    | 4.15E-07                            |   | 1.87E-05       | IGFBP7      |
| 4                                             | 57030773                                       | 57110385                            |   | - 1930         |             |
| protein_coding                                | insulin like growth factor binding protein 7   | [Source:HGNC Symbol;Acc:HGNC:5476]  |   |                |             |
|                                               |                                                | -                                   |   | 645 420        | 660         |

|                        |                                                 |   |             |             |        |
|------------------------|-------------------------------------------------|---|-------------|-------------|--------|
| 7                      | 31                                              | 2 | 16.36556823 | 10.31141871 |        |
| 21.27617105            | 0.201536065                                     |   | 0.987305929 | 0.048184095 |        |
| ENSG00000100911        | 1050.596619                                     |   | 1309.792827 | 1479.85187  |        |
| 629.8688449            | 746.5356556                                     |   | 461.5118892 | 1280.080439 |        |
| 612.6387966            | 1.064259321                                     |   | 4.24E-07    | 1.90E-05    | PSME2  |
| 14                     | 24143362                                        |   | 24147570    | -           | 3582   |
| protein_coding         | proteasome activator subunit 2                  |   |             |             |        |
| Symbol;Acc:HGNC:9569]  | -                                               |   | 1158 1480   | 1273 608    | 654    |
| 535                    | 15.83112075                                     |   | 19.57774082 | 22.11106538 |        |
| 9.431701368            | 11.22275616                                     |   | 6.944791612 |             |        |
| ENSG00000143641        | 1496.964094                                     |   | 1745.210442 | 2122.709753 |        |
| 1027.680747            | 1025.059662                                     |   | 831.5840396 | 1788.294763 |        |
| 961.4414828            | 0.89540124                                      |   | 4.36E-07    | 1.95E-05    | GALNT2 |
| 1                      | 230057990                                       |   | 230282124   | +           | 7743   |
| protein_coding         | polypeptide N-acetylgalactosaminyltransferase 2 |   |             |             |        |
| [Source:HGNC           | Symbol;Acc:HGNC:4124]                           |   | -           | 1650 1972   | 1826   |
| 992                    | 898 964                                         |   | 10.43526227 | 12.06768852 |        |
| 14.67230548            | 7.118925639                                     |   | 7.128767285 | 5.788936594 |        |
| ENSG00000108821        | 34404.77113                                     |   | 32846.59511 | 64901.90881 |        |
| 12187.13337            | 10482.31946                                     |   | 6158.380144 | 44051.09168 |        |
| 9609.277659            | 2.196692226                                     |   | 4.45E-07    | 1.99E-05    | COL1A1 |
| 17                     | 50183289                                        |   | 50201632    | -           | 9819   |
| protein_coding         | collagen type I alpha 1 chain                   |   |             |             |        |
| Symbol;Acc:HGNC:2197]  | -                                               |   | 37922 37115 | 55830 11764 | 9183   |
| 7139                   | 189.1266184                                     |   | 179.1053859 | 353.7587694 |        |
| 66.5732562             | 57.48634335                                     |   | 33.80657237 |             |        |
| ENSG00000149782        | 1359.061947                                     |   | 1274.39302  | 1493.80177  |        |
| 861.9257878            | 744.252672                                      |   | 627.1385859 | 1375.752246 |        |
| 744.4390152            | 0.886408133                                     |   | 4.51E-07    | 2.01E-05    | PLCB3  |
| 11                     | 64251523                                        |   | 64269150    | +           | 4964   |
| protein_coding         | phospholipase C beta 3                          |   |             |             |        |
| Symbol;Acc:HGNC:9056]  | -                                               |   | 1498 1440   | 1285 832    | 652    |
| 727                    | 14.77776391                                     |   | 13.74539296 | 16.10564794 |        |
| 9.313300095            | 8.07352479                                      |   | 6.809789009 |             |        |
| ENSG00000136824        | 2502.198164                                     |   | 1685.915767 | 2343.583166 |        |
| 1377.838098            | 950.8626929                                     |   | 929.9248908 | 2177.232366 |        |
| 1086.208561            | 1.003186622                                     |   | 4.55E-07    | 2.02E-05    | SMC2   |
| 9                      | 104094260                                       |   | 104141417   | +           | 6468   |
| protein_coding         | structural maintenance of chromosomes 2         |   |             |             |        |
| Symbol;Acc:HGNC:14011] | -                                               |   | 2758 1905   | 2016 1330   | 833    |
| 1078                   | 20.88107889                                     |   | 13.95569308 | 19.39221257 |        |
| 11.42598563            | 7.916301937                                     |   | 7.749608583 |             |        |
| ENSG00000020181        | 753.0183018                                     |   | 643.3914763 | 1056.70491  |        |
| 392.6320596            | 376.6923033                                     |   | 223.4235127 | 817.7048959 |        |
| 330.9159585            | 1.306236979                                     |   | 4.55E-07    | 2.02E-05    | ADGRA2 |
| 8                      | 37784191                                        |   | 37844896    | +           | 7061   |
| protein_coding         | adhesion G protein-coupled receptor A2          |   |             |             |        |
| Symbol;Acc:HGNC:17849] | -                                               |   | 830 727     | 909 379     | 330    |
| 259                    | 5.756262153                                     |   | 4.878593583 | 8.009483634 |        |
| 2.98253152             | 2.872731844                                     |   | 1.705550452 |             |        |



|                                                                                             |             |             |             |        |                |
|---------------------------------------------------------------------------------------------|-------------|-------------|-------------|--------|----------------|
| ENSG00000176890                                                                             | 1331.844418 | 1484.136872 | 1717.000167 |        |                |
| 886.7890316                                                                                 | 792.1953288 | 515.8581491 | 1510.993819 |        |                |
| 731.6141698                                                                                 | 1.047234729 | 4.67E-07    | 2.07E-05    | TYMS   |                |
| 18                                                                                          | 657604      | 673578      | +           | 2470   | protein_coding |
| thymidylate synthetase [Source:HGNC Symbol;Acc:HGNC:12441] -                                |             |             |             |        |                |
| 1468                                                                                        | 1677        | 1477        | 856         | 694    | 598            |
| 32.17085107                                                                                 | 37.2040645  | 19.25700996 | 17.2706975  |        |                |
| 11.25732615                                                                                 |             |             |             |        |                |
| ENSG00000134247                                                                             | 1452.508797 | 1585.911314 | 1822.786907 |        |                |
| 966.5586057                                                                                 | 883.514675  | 597.8088584 | 1620.402339 |        |                |
| 815.960713                                                                                  | 0.990589627 | 4.72E-07    | 2.08E-05    | PTGFRN |                |
| 1                                                                                           | 116910057   | 116990358   | +           | 6352   |                |
| protein_coding prostaglandin F2 receptor inhibitor [Source:HGNC Symbol;Acc:HGNC:9601] -     |             |             |             |        |                |
| 693                                                                                         | 12.34268161 | 13.36761585 | 1568        | 933    | 774            |
| 8.16174831                                                                                  | 7.489931252 | 5.072870354 | 15.35827415 |        |                |
| ENSG00000117525                                                                             | 741.2240392 | 627.4615636 | 662.6202404 |        |                |
| 370.8767212                                                                                 | 292.221908  | 198.4069804 | 677.1019477 |        |                |
| 287.1685365                                                                                 | 1.239637922 | 4.77E-07    | 2.10E-05    | F3     |                |
| 1                                                                                           | 94529225    | 94541800    | -           | 2875   |                |
| protein_coding "coagulation factor III, tissue factor [Source:HGNC Symbol;Acc:HGNC:3541]" - |             |             |             |        |                |
| 230                                                                                         | 13.91595101 | 11.6851644  | 817         | 709    | 570            |
| 6.919221304                                                                                 | 5.473302815 | 3.71981212  | 12.33513348 | 358    | 256            |
| ENSG00000182481                                                                             | 7623.629867 | 6570.204017 | 7920.055611 |        |                |
| 5030.663011                                                                                 | 4605.919527 | 3954.337384 | 7371.296498 |        |                |
| 4530.30664                                                                                  | 0.702389394 | 4.88E-07    | 2.14E-05    | KPNA2  |                |
| 17                                                                                          | 68035519    | 68046842    | +           | 3140   |                |
| protein_coding karyopherin subunit alpha 2 [Source:HGNC Symbol;Acc:HGNC:6395] -             |             |             |             |        |                |
| 4584                                                                                        | 131.0489058 | 112.0301083 | 6813        | 4856   | 4035           |
| 85.93321765                                                                                 | 78.98802431 | 67.88064792 | 134.9943486 |        |                |
| ENSG00000173905                                                                             | 2550.282465 | 2312.492335 | 2623.743654 |        |                |
| 1695.880426                                                                                 | 1354.9508   | 1197.342995 | 2495.506151 |        |                |
| 1416.058074                                                                                 | 0.817697224 | 4.91E-07    | 2.15E-05    | GOLIM4 |                |
| 3                                                                                           | 168008677   | 168095975   | -           | 4647   |                |
| protein_coding golgi integral membrane protein 4 [Source:HGNC Symbol;Acc:HGNC:15448] -      |             |             |             |        |                |
| 1388                                                                                        | 29.62216909 | 26.64361675 | 2811        | 2613   | 2257           |
| 19.5743816                                                                                  | 15.70093106 | 13.88825915 | 1637        | 1187   | 30.21800114    |
| ENSG00000184557                                                                             | 1134.063707 | 1315.987793 | 1585.63861  |        |                |
| 550.0992708                                                                                 | 815.0251653 | 396.8139608 | 1345.230037 |        |                |
| 587.312799                                                                                  | 1.197171738 | 4.96E-07    | 2.16E-05    | SOCS3  |                |
| 17                                                                                          | 78356778    | 78360077    | -           | 2734   |                |
| protein_coding suppressor of cytokine signaling 3 [Source:HGNC Symbol;Acc:HGNC:19391] -     |             |             |             |        |                |
| 460                                                                                         | 22.38928302 | 25.77145266 | 1250        | 1487   | 1364           |
| 10.79215203                                                                                 | 16.05266201 | 7.823306397 | 531         | 714    | 31.04007105    |
| ENSG00000171603                                                                             | 3058.343006 | 3119.607915 | 4187.294923 |        |                |
| 2097.836202                                                                                 | 2060.39275  | 1749.431984 | 3455.081948 |        |                |

|                                                   |                                                     |                  |                  |        |
|---------------------------------------------------|-----------------------------------------------------|------------------|------------------|--------|
| 1969.220312                                       | 0.810989915                                         | 4.97E-07         | 2.17E-05         | CLSTN1 |
| 1                                                 | 9729026 9824526                                     | - 5683           | protein_coding   |        |
| calsyntenin 1 [Source:HGNC Symbol;Acc:HGNC:17447] |                                                     |                  | -                | 3371   |
| 3525                                              | 3602 2025                                           | 1805 2028        | 29.0475682       |        |
| 29.39056305                                       | 39.43418768                                         | 19.79973671      | 19.52301601      |        |
| 16.59286244                                       |                                                     |                  |                  |        |
| ENSG00000064225                                   | 202.3169654                                         | 194.6989337      | 145.3114562      |        |
| 306.6466745                                       | 600.4247016                                         | 611.6110831      | 180.7757851      |        |
| 506.2274864                                       | -1.483730682                                        | 5.02E-07         | 2.18E-05         |        |
| ST3GAL6 3                                         | 98732236                                            | 98821201         | + 6288           |        |
| protein_coding                                    | "ST3 beta-galactoside alpha-2,3-sialyltransferase 6 |                  |                  |        |
| [Source:HGNC Symbol;Acc:HGNC:18080]"              |                                                     | -                | 223 220          | 125    |
| 296                                               | 526 709                                             | 1.736684841      | 1.657816999      |        |
| 1.236813812                                       | 2.615719811                                         | 5.141863831      | 5.242817257      |        |
| ENSG00000198492                                   | 3008.444203                                         | 3447.941117      | 3180.577154      |        |
| 4492.995362                                       | 5588.743991                                         | 5541.593227      | 3212.320825      |        |
| 5207.777527                                       | -0.697030161                                        | 5.03E-07         | 2.18E-05         | YTHDF2 |
| 1                                                 | 28736621                                            | 28769775         | + 3859           |        |
| protein_coding                                    | YTH N6-methyladenosine RNA binding protein 2        |                  |                  |        |
| [Source:HGNC Symbol;Acc:HGNC:31675]               |                                                     | -                | 3316 3896        | 2736   |
| 4337                                              | 4896 6424                                           | 42.07929227      | 47.8377352       |        |
| 44.11112774                                       | 62.44917239                                         | 77.98552331      | 77.40370905      |        |
| ENSG00000157224                                   | 1056.040124                                         | 940.7498478      | 867.2187708      |        |
| 1620.254726                                       | 1610.64497                                          | 1640.739464      | 954.669581       |        |
| 1623.87972                                        | -0.76573995                                         | 5.20E-07         | 2.25E-05         | CLDN12 |
| 7                                                 | 90383721                                            | 90513402         | + 6741           |        |
| protein_coding                                    | claudin 12 [Source:HGNC Symbol;Acc:HGNC:2034]       |                  |                  | -      |
| 1164                                              | 1063 746                                            | 1564 1411        | 1902 8.455851293 |        |
| 7.471974451                                       | 6.88527589                                          | 12.89212374      | 12.86619256      |        |
| 13.11949757                                       |                                                     |                  |                  |        |
| ENSG00000118705                                   | 3974.666482                                         | 3997.523107      | 4576.729626      |        |
| 2759.82007                                        | 2158.561047                                         | 1441.469845      | 4182.973071      |        |
| 2119.950321                                       | 0.980865152                                         | 5.21E-07         | 2.25E-05         | RPN2   |
| 20                                                | 37178410                                            | 37241623         | + 2819           |        |
| protein_coding                                    | ribophorin II [Source:HGNC Symbol;Acc:HGNC:10382]   |                  |                  |        |
| -                                                 | 4381 4517                                           | 3937 2664        | 1891 1671        |        |
| 76.10389085                                       | 75.9244152                                          | 86.8914782       | 52.51110874      |        |
| 41.23289358                                       | 27.56210559                                         |                  |                  |        |
| ENSG00000111725                                   | 755.7400547                                         | 690.2962194      | 775.3819305      |        |
| 1132.313565                                       | 1389.195555                                         | 1553.612921      | 740.4727349      |        |
| 1358.374013                                       | -0.876123129                                        | 5.44E-07         | 2.34E-05         | PRKAB1 |
| 12                                                | 119667753                                           | 119681630        | + 6246           |        |
| protein_coding                                    | protein kinase AMP-activated non-catalytic subunit  |                  |                  |        |
| beta 1 [Source:HGNC Symbol;Acc:HGNC:9378]         |                                                     | -                | 833 780          |        |
| 667                                               | 1093 1217                                           | 1801 6.530880016 | 5.917238355      |        |
| 6.644016474                                       | 9.72367032                                          | 11.97666656      | 13.40734396      |        |
| ENSG00000177706                                   | 1991.41587                                          | 2109.828445      | 4026.871075      |        |
| 941.6953619                                       | 1309.291127                                         | 1330.189408      | 2709.371797      |        |
| 1193.725299                                       | 1.181817179                                         | 5.57E-07         | 2.39E-05         | FAM20C |
| 7                                                 | 192969 260745                                       | + 4629           |                  |        |

|                                    |                                                                                         |             |             |             |                |
|------------------------------------|-----------------------------------------------------------------------------------------|-------------|-------------|-------------|----------------|
| protein_coding                     | "FAM20C, golgi associated secretory pathway kinase [Source:HGNC Symbol;Acc:HGNC:22140]" | -           | 2195        | 2384        | 3464           |
|                                    | 909                                                                                     | 1147        | 1542        | 23.22073848 | 24.40312874    |
| 46.55834661                        | 10.91160776                                                                             | 15.23083093 | 15.48917231 |             |                |
| ENSG00000111799                    | 2395.14255                                                                              | 2805.434635 | 2946.916332 |             |                |
| 1750.786756                        | 1544.438444                                                                             | 1143.859374 | 2715.831173 |             |                |
| 1479.694858                        | 0.876568484                                                                             | 5.63E-07    | 2.41E-05    |             |                |
| COL12A1                            | 6                                                                                       | 75084326    | 75206051    | -           | 12481          |
| protein_coding                     | collagen type XII alpha 1 chain [Source:HGNC Symbol;Acc:HGNC:2188]                      | -           | 2640        | 3170        | 2535           |
|                                    | 1326                                                                                    | 10.3581746  | 12.03472913 | 12.63675097 | 1353           |
| 7.524010017                        | 6.663398299                                                                             | 4.93997964  |             |             |                |
| ENSG00000170801                    | 490.8227726                                                                             | 484.9773439 | 782.3568804 |             |                |
| 152.2873688                        | 303.6368263                                                                             | 167.3519748 | 586.0523323 |             |                |
| 207.7587233                        | 1.497837199                                                                             | 5.77E-07    | 2.47E-05    |             | HTRA3          |
| 4                                  | 8269765                                                                                 | 8307111     | +           | 3321        | protein_coding |
| serine peptidase 3                 | [Source:HGNC Symbol;Acc:HGNC:30406]                                                     | -           |             |             | HtrA           |
|                                    | 548                                                                                     | 673         | 147         | 266         | 194            |
| 7.818764343                        | 12.60819843                                                                             | 2.459577451 | 4.923343317 |             |                |
| 2.716213307                        |                                                                                         |             |             |             |                |
| ENSG00000248323                    | 347.47712                                                                               | 466.3924457 | 355.7224449 |             |                |
| 742.7894108                        | 777.355935                                                                              | 821.2323711 | 389.8640035 |             |                |
| 780.459239                         | -1.000449066                                                                            | 5.80E-07    | 2.47E-05    |             | LUCAT1         |
| 5                                  | 91054834                                                                                | 91314547    | -           | 16538       |                |
| antisense                          | lung cancer associated transcript 1 [Source:HGNC Symbol;Acc:HGNC:48498]                 | -           | 383         | 527         | 306            |
|                                    | 952                                                                                     | 1.134082033 | 1.509920455 | 1.151185433 | 681            |
| 2.409063301                        | 2.531112709                                                                             | 2.676609277 |             |             |                |
| ENSG00000146576                    | 1403.517244                                                                             | 1694.765718 | 1584.476119 |             |                |
| 2298.81409                         | 2701.911157                                                                             | 3378.95714  | 1560.919694 |             |                |
| 2793.227463                        | -0.83990422                                                                             | 5.98E-07    | 2.54E-05    |             |                |
| C7orf26                            | 7                                                                                       | 6590017     | 6608726     | +           | 2728           |
| chromosome 7 open reading frame 26 | [Source:HGNC Symbol;Acc:HGNC:21702]                                                     | -           | 1547        | 1915        | 1363           |
|                                    | 3917                                                                                    | 27.76992017 | 33.26219101 | 31.0855343  | 2219           |
| 45.19859968                        | 53.33364332                                                                             | 66.76367336 |             |             | 2367           |
| ENSG00000038427                    | 577.9188653                                                                             | 300.0133569 | 476.6215765 |             |                |
| 208.2296675                        | 133.5545439                                                                             | 107.8298807 | 451.5179329 |             |                |
| 149.871364                         | 1.592339339                                                                             | 6.10E-07    | 2.59E-05    |             | VCAN           |
| 5                                  | 83471465                                                                                | 83582303    | +           | 14831       |                |
| protein_coding                     | versican [Source:HGNC Symbol;Acc:HGNC:2464]                                             | -           |             |             |                |
|                                    | 637                                                                                     | 339         | 410         | 201         | 117            |
|                                    | 1.083067949                                                                             | 1.71996761  | 0.753074021 | 0.484911839 |                |
|                                    | 0.391895788                                                                             |             |             |             |                |
| ENSG00000152952                    | 5092.399672                                                                             | 4636.489607 | 7413.209251 |             |                |
| 3481.890111                        | 3061.481083                                                                             | 2282.542914 | 5714.032844 |             |                |
| 2941.971369                        | 0.957736334                                                                             | 6.16E-07    | 2.61E-05    |             | PL0D2          |
| 3                                  | 146069440                                                                               | 146163653   | -           | 7646        |                |
| protein_coding                     | "procollagen-lysine,2-oxoglutarate 5-dioxygenase 2 [Source:HGNC Symbol;Acc:HGNC:9082]"  | -           | 5613        | 5239        | 6377           |

|                                                            |                                                       |          |                                |             |                |
|------------------------------------------------------------|-------------------------------------------------------|----------|--------------------------------|-------------|----------------|
| 3361                                                       | 2682                                                  | 2646     | 35.94921671                    | 32.46687923 |                |
| 51.89063316                                                | 24.42565746                                           |          | 21.56114598                    | 16.09113077 |                |
| ENSG00000230882                                            | 8.165258694                                           |          | 24.77986429                    | 11.6249165  |                |
| 93.23716454                                                | 110.7247073                                           |          | 105.2419635                    | 14.85667983 |                |
| 103.0679451                                                | -2.78550078                                           |          | 6.30E-07                       | 2.66E-05    |                |
| AC005077.4                                                 | 7                                                     | 76071469 | 76074963                       | -           | 3495           |
| processed_pseudogene                                       |                                                       |          | hypothetical protein LOC285908 |             |                |
| (LOC285908) pseudogene                                     | -                                                     |          | 9                              | 28          | 10             |
| 122                                                        | 0.126102592                                           |          | 0.379609692                    | 0.178016258 | 97             |
| 1.430893705                                                | 1.705972061                                           |          | 1.623093987                    |             |                |
| ENSG00000162390                                            | 234.0707492                                           |          | 267.2685362                    | 202.2735471 |                |
| 400.9198075                                                | 579.8778487                                           |          | 883.3423824                    | 234.5376108 |                |
| 621.3800129                                                | -1.40543803                                           |          | 6.57E-07                       | 2.77E-05    | ACOT11         |
| 1                                                          | 54542257                                              |          | 54639192                       | +           | 9768           |
| protein_coding                                             | acyl-CoA thioesterase 11 [Source:HGNC                 |          |                                |             |                |
| Symbol;Acc:HGNC:18156]                                     | -                                                     |          | 258                            | 302         | 174            |
| 1024                                                       | 1.29342943                                            |          | 1.464966632                    | 1.108282419 | 508            |
| 2.201493248                                                | 3.196726061                                           |          | 4.874446676                    |             |                |
| ENSG00000254139                                            | 19.05227029                                           |          | 21.23988367                    | 4.6499666   |                |
| 78.73360561                                                | 86.75337894                                           |          | 198.4069804                    | 14.98070685 |                |
| 121.2979883                                                | -3.000117187                                          |          | 6.79E-07                       | 2.85E-05    |                |
| AC104051.2                                                 | 8                                                     | 57746149 | 57750199                       | +           | 2461           |
| lincRNA                                                    | uncharacterized LOC286178 [Source:NCBI                |          |                                |             |                |
| gene;Acc:286178]                                           | -                                                     |          | 21                             | 24          | 4              |
| 230                                                        | 0.417865354                                           |          | 0.462089467                    | 0.101124229 | 76             |
| 1.715987114                                                | 1.898232212                                           |          | 4.345574907                    |             |                |
| ENSG00000140391                                            | 3887.570389                                           |          | 3857.693872                    | 4417.46827  |                |
| 2713.201488                                                | 2610.591811                                           |          | 2283.405553                    | 4054.244177 |                |
| 2535.732951                                                | 0.677104489                                           |          | 6.79E-07                       | 2.85E-05    | TSPAN3         |
| 15                                                         | 77041404                                              |          | 77083984                       | -           | 8506           |
| protein_coding                                             | tetraspanin 3 [Source:HGNC Symbol;Acc:HGNC:17752]     |          |                                |             |                |
| -                                                          | 4285                                                  | 4359     | 3800                           | 2619        | 2287           |
| 24.66914692                                                | 24.28219439                                           |          | 27.79489673                    | 17.10890299 |                |
| 16.52677621                                                | 14.4697018                                            |          |                                |             |                |
| ENSG00000109685                                            | 4804.801116                                           |          | 4034.692903                    | 4347.718771 |                |
| 3077.862398                                                | 2479.320251                                           |          | 2226.471376                    | 4395.737596 |                |
| 2594.551342                                                | 0.760844086                                           |          | 6.88E-07                       | 2.87E-05    | NSD2           |
| 4                                                          | 1871424                                               | 1982207  | +                              | 19776       | protein_coding |
| nuclear receptor binding SET domain protein 2 [Source:HGNC |                                                       |          |                                |             |                |
| Symbol;Acc:HGNC:12766]                                     | HMG                                                   |          | 5296                           | 4559        | 3740           |
| 2581                                                       | 13.11409141                                           |          | 10.92339352                    | 11.76630212 | 2172           |
| 8.347880856                                                | 6.751009633                                           |          | 6.068489003                    |             |                |
| ENSG00000233608                                            | 280.3405485                                           |          | 237.178701                     | 315.0352371 |                |
| 119.1363769                                                | 84.47039528                                           |          | 86.26390453                    | 277.5181622 |                |
| 96.62355891                                                | 1.521536154                                           |          | 6.89E-07                       | 2.87E-05    | TWIST2         |
| 2                                                          | 238848032                                             |          | 238910543                      | +           | 1878           |
| protein_coding                                             | twist family bHLH transcription factor 2 [Source:HGNC |          |                                |             |                |
| Symbol;Acc:HGNC:20670]                                     | bHLH                                                  |          | 309                            | 268         | 271            |
| 100                                                        | 8.057337864                                           |          | 6.761851782                    | 8.978019608 | 74             |
| 3.402626626                                                | 2.422052162                                           |          | 2.475913285                    |             |                |

|                                                                      |                                                |             |             |         |
|----------------------------------------------------------------------|------------------------------------------------|-------------|-------------|---------|
| ENSG00000136869                                                      | 501.7097842                                    | 362.8480128 | 539.3961256 |         |
| 235.1648483                                                          | 108.4417237                                    | 85.40126548 | 467.9846408 |         |
| 143.0026125                                                          | 1.711607665                                    | 6.98E-07    | 2.90E-05    | TLR4    |
| 9                                                                    | 117704175                                      | 117724730   | + 13272     |         |
| protein_coding                                                       | toll like receptor 4 [Source:HGNC              |             |             |         |
| Symbol;Acc:HGNC:11850]                                               | -                                              | 553 410     | 464 227     | 95      |
| 99                                                                   | 2.040409993                                    | 1.463773648 | 2.175146206 |         |
| 0.950389277                                                          | 0.439981679                                    | 0.346840529 |             |         |
| ENSG00000109881                                                      | 968.0367807                                    | 817.7355215 | 942.7807281 |         |
| 551.1352393                                                          | 437.1913702                                    | 434.7700788 | 909.5176767 |         |
| 474.3655628                                                          | 0.939108607                                    | 7.56E-07    | 3.14E-05    | CCDC34  |
| 11                                                                   | 27330827                                       | 27363868    | - 3733      |         |
| protein_coding                                                       | coiled-coil domain containing 34 [Source:HGNC  |             |             |         |
| Symbol;Acc:HGNC:25079]                                               | -                                              | 1067 924    | 811 532     | 383     |
| 504                                                                  | 13.99700485                                    | 11.72844464 | 13.51667    |         |
| 7.918915085                                                          | 6.306496285                                    | 6.277743465 |             |         |
| ENSG00000144736                                                      | 1161.281236                                    | 1245.18818  | 1050.892452 |         |
| 1866.815228                                                          | 1852.641237                                    | 1999.597307 | 1152.453956 |         |
| 1906.351257                                                          | -0.725650528                                   | 7.64E-07    | 3.17E-05    | SHQ1    |
| 3                                                                    | 72749277                                       | 72861914    | - 5841      |         |
| protein_coding                                                       | "SHQ1, H/ACA ribonucleoprotein assembly factor |             |             |         |
| [Source:HGNC Symbol;Acc:HGNC:25543]"                                 | -                                              | 1280 1407   |             | 904     |
| 1802                                                                 | 1623 2318                                      | 10.73127803 | 11.41388078 |         |
| 9.629152634                                                          | 17.14271575                                    | 17.07963848 | 18.45258623 |         |
| ENSG00000167889                                                      | 374.6946489                                    | 321.2532406 | 444.0718103 |         |
| 105.6687865                                                          | 130.1300684                                    | 183.7421166 | 380.0065666 |         |
| 139.8469905                                                          | 1.437796875                                    | 7.70E-07    | 3.18E-05    | MGAT5B  |
| 17                                                                   | 76868456                                       | 76950393    | + 6386      |         |
| protein_coding                                                       | "alpha-1,6-mannosylglycoprotein 6-beta-N-      |             |             |         |
| acetylglucosaminyltransferase B [Source:HGNC Symbol;Acc:HGNC:24140]" | -                                              | 413 363     | 382 102     | 114 213 |
| 3.167012817                                                          | 2.69342044                                     | 3.721699425 | 0.88753053  |         |
| 1.09729474                                                           | 1.550892541                                    |             |             |         |
| ENSG00000133030                                                      | 7434.921666                                    | 7046.331409 | 7176.060955 |         |
| 5042.058665                                                          | 4631.032347                                    | 4843.718239 | 7219.104677 |         |
| 4838.936417                                                          | 0.577089297                                    | 7.75E-07    | 3.20E-05    | MPRIIP  |
| 17                                                                   | 17042545                                       | 17217679    | + 18153     |         |
| protein_coding                                                       | myosin phosphatase Rho interacting protein     |             |             |         |
| [Source:HGNC Symbol;Acc:HGNC:30321]                                  | -                                              | 8195 7962   |             | 6173    |
| 4867                                                                 | 4057 5615                                      | 22.10697061 | 20.78261567 |         |
| 21.15703068                                                          | 14.89789751                                    | 13.73738153 | 14.38243338 |         |
| ENSG00000117385                                                      | 1453.416047                                    | 1508.031741 | 1821.624415 |         |
| 1017.321062                                                          | 823.0156081                                    | 660.7815087 | 1594.357401 |         |
| 833.7060596                                                          | 0.93568955                                     | 7.89E-07    | 3.25E-05    | P3H1    |
| 1                                                                    | 42746335                                       | 42767084    | - 6766      |         |
| protein_coding                                                       | prolyl 3-hydroxylase 1 [Source:HGNC            |             |             |         |
| Symbol;Acc:HGNC:19316]                                               | -                                              | 1602 1704   | 1567 982    | 721     |
| 766                                                                  | 11.59469161                                    | 11.93339559 | 14.40933206 |         |
| 8.064761676                                                          | 6.550140738                                    | 5.264144406 |             |         |
| ENSG00000149948                                                      | 1961.476588                                    | 2096.553518 | 1493.80177  |         |

|                                     |                                                     |             |             |                |
|-------------------------------------|-----------------------------------------------------|-------------|-------------|----------------|
| 3145.200351                         | 2892.540293                                         | 3965.551691 | 1850.610625 |                |
| 3334.430778                         | -0.8491275                                          | 8.15E-07    | 3.34E-05    | HMGA2          |
| 12                                  | 65824131                                            | 65966295    | + 15403     |                |
| protein_coding                      | high mobility group AT-hook 2 [Source:HGNC          |             |             |                |
| Symbol;Acc:HGNC:5009]               | HMGI/HMGY                                           | 2162        | 2369        | 1285 3036      |
| 2534                                | 4597                                                | 6.873517738 | 7.287627838 | 5.190445782    |
| 10.9523798                          | 10.11226996                                         | 13.87714757 |             |                |
| ENSG00000115414                     | 26922.67242                                         | 19873.45116 | 48314.31546 |                |
| 8138.568496                         | 6062.463099                                         | 3940.535159 | 31703.47968 |                |
| 6047.188918                         | 2.39031807                                          | 8.16E-07    | 3.34E-05    | FN1            |
| 2                                   | 215360440                                           | 215436172   | - 17315     |                |
| protein_coding                      | fibronectin 1 [Source:HGNC Symbol;Acc:HGNC:3778]    |             |             |                |
| -                                   | 29675                                               | 22456       | 41561       | 7856 5311 4568 |
| 83.92607548                         | 61.45204566                                         | 149.3380029 | 25.21105516 |                |
| 18.85389854                         | 12.26689414                                         |             |             |                |
| ENSG00000123146                     | 2145.648535                                         | 2369.132025 | 2967.841182 |                |
| 1604.715199                         | 1327.554996                                         | 1073.985611 | 2494.207247 |                |
| 1335.418602                         | 0.901386197                                         | 8.20E-07    | 3.35E-05    | ADGRE5         |
| 19                                  | 14380501                                            | 14408725    | + 5382      |                |
| protein_coding                      | adhesion G protein-coupled receptor E5 [Source:HGNC |             |             |                |
| Symbol;Acc:HGNC:1711]               | -                                                   | 2365        | 2677        | 2553 1549 1163 |
| 1245                                | 21.51870517                                         | 23.56845526 | 29.51304146 |                |
| 15.99262552                         | 13.28260879                                         | 10.75614569 |             |                |
| ENSG00000077312                     | 1361.7837                                           | 1516.881692 | 1617.025885 |                |
| 783.1921821                         | 777.355935                                          | 975.6447602 | 1498.563759 |                |
| 845.3976258                         | 0.824580668                                         | 8.62E-07    | 3.51E-05    | SNRPA          |
| 19                                  | 40750637                                            | 40765389    | + 2361      |                |
| protein_coding                      | small nuclear ribonucleoprotein polypeptide A       |             |             |                |
| [Source:HGNC Symbol;Acc:HGNC:11151] | -                                                   |             | 1501        | 1714 1391      |
| 756                                 | 681                                                 | 1131        | 31.13245641 | 34.39863991    |
| 36.65540223                         | 17.79253595                                         | 17.72958153 | 22.27397029 |                |
| ENSG00000184678                     | 67.13657148                                         | 58.40968011 | 68.58700734 |                |
| 197.8699825                         | 167.7992987                                         | 278.6324116 | 64.71108631 |                |
| 214.767231                          | -1.734027466                                        | 8.68E-07    | 3.53E-05    |                |
| HIST2H2BE                           | 1                                                   | 149884459   | 149886652   | - 2194         |
| protein_coding                      | histone cluster 2 H2B family member e               |             |             |                |
| [Source:HGNC Symbol;Acc:HGNC:4760]  | -                                                   |             | 74          | 66 59          |
| 191                                 | 147                                                 | 323         | 1.6516719   | 1.425390149    |
| 1.673101294                         | 4.837364216                                         | 4.118395699 | 6.845369843 |                |
| ENSG00000126787                     | 1634.866241                                         | 1008.009479 | 1464.739479 |                |
| 356.3731622                         | 243.1377594                                         | 106.1046026 | 1369.205066 |                |
| 235.2051747                         | 2.54234296                                          | 8.76E-07    | 3.55E-05    | DLGAP5         |
| 14                                  | 55148112                                            | 55191678    | - 3667      |                |
| protein_coding                      | DLG associated protein 5 [Source:HGNC               |             |             |                |
| Symbol;Acc:HGNC:16864]              | -                                                   | 1802        | 1139        | 1260 344 213   |
| 123                                 | 24.06426272                                         | 14.71767657 | 21.37797091 |                |
| 5.212662132                         | 3.570393257                                         | 1.559643069 |             |                |
| ENSG00000115306                     | 3292.413756                                         | 2512.50124  | 3352.625918 |                |
| 2035.678092                         | 1608.361986                                         | 1482.876519 | 3052.513638 |                |
| 1708.972199                         | 0.836873676                                         | 8.93E-07    | 3.62E-05    | SPTBN1         |

|                                      |                                                  |             |             |       |  |
|--------------------------------------|--------------------------------------------------|-------------|-------------|-------|--|
| 2                                    | 54456285                                         | 54671445    | +           | 18504 |  |
| protein_coding                       | "spectrin beta, non-erythrocytic 1 [Source:HGNC  |             |             |       |  |
| Symbol;Acc:HGNC:11275]"              | -                                                | 3629 2839   | 2884 1965   | 1409  |  |
| 1719                                 | 9.603953132                                      | 7.269862781 | 9.696979621 |       |  |
| 5.900773961                          | 4.680505216                                      | 4.319577547 |             |       |  |
| ENSG00000132780                      | 5641.286506                                      | 5346.25572  | 5023.126419 |       |  |
| 3805.112282                          | 2777.249618                                      | 3162.43474  | 5336.889549 |       |  |
| 3248.265547                          | 0.716315564                                      | 8.97E-07    | 3.62E-05    | NASP  |  |
| 1                                    | 45583846                                         | 45618904    | +           | 8304  |  |
| protein_coding                       | nuclear autoantigenic sperm protein [Source:HGNC |             |             |       |  |
| Symbol;Acc:HGNC:7644]"               | -                                                | 6218 6041   | 4321 3673   | 2433  |  |
| 3666                                 | 36.66840849                                      | 34.47052803 | 32.37455238 |       |  |
| 24.57794859                          | 18.00951961                                      | 20.52750366 |             |       |  |
| ENSG00000232112                      | 535.2780699                                      | 873.4902161 | 782.3568804 |       |  |
| 342.9055718                          | 327.6081547                                      | 346.7808962 | 730.3750555 |       |  |
| 339.0982076                          | 1.106398034                                      | 9.22E-07    | 3.71E-05    | TMA7  |  |
| 3                                    | 48440257                                         | 48444208    | +           | 1139  |  |
| protein_coding                       | translation machinery associated 7 homolog       |             |             |       |  |
| [Source:HGNC Symbol;Acc:HGNC:26932]" | -                                                |             | 590 987     | 673   |  |
| 331                                  | 287 402                                          | 25.36629105 | 41.06008739 |       |  |
| 36.7619201                           | 16.14790974                                      | 15.48836351 | 16.41093582 |       |  |
| ENSG00000218336                      | 1639.402496                                      | 1323.952749 | 2180.834335 |       |  |
| 1016.285093                          | 831.0060509                                      | 700.4629048 | 1714.72986  |       |  |
| 849.2513497                          | 1.013548145                                      | 9.57E-07    | 3.85E-05    | TENM3 |  |
| 4                                    | 182143987                                        | 182803024   | +           | 11983 |  |
| protein_coding                       | teneurin transmembrane protein 3 [Source:HGNC    |             |             |       |  |
| Symbol;Acc:HGNC:29944]"              | -                                                | 1807 1496   | 1876 981    | 728   |  |
| 812                                  | 7.384503094                                      | 5.915513844 | 9.740340102 |       |  |
| 4.548995338                          | 3.734334184                                      | 3.150804725 |             |       |  |
| ENSG00000149968                      | 951.7062633                                      | 890.305124  | 924.1808617 |       |  |
| 1887.534598                          | 1405.17644                                       | 1551.025003 | 922.064083  |       |  |
| 1614.578681                          | -0.808358373                                     | 9.75E-07    | 3.91E-05    | MMP3  |  |
| 11                                   | 102835801                                        | 102843803   | -           | 2048  |  |
| protein_coding                       | matrix metalloproteinase 3 [Source:HGNC          |             |             |       |  |
| Symbol;Acc:HGNC:7173]"               | -                                                | 1049 1006   | 795 1822    | 1231  |  |
| 1798                                 | 25.08269628                                      | 23.27525615 | 24.15149521 |       |  |
| 49.43453621                          | 36.94668355                                      | 40.82166865 |             |       |  |
| ENSG00000104723                      | 23.58852512                                      | 42.47976735 | 34.8747495  |       |  |
| 105.6687865                          | 158.6673641                                      | 188.0553119 | 33.64768065 |       |  |
| 150.7971542                          | -2.165243726                                     | 9.84E-07    | 3.94E-05    | TUSC3 |  |
| 8                                    | 15417215                                         | 15766649    | +           | 5190  |  |
| protein_coding                       | tumor suppressor candidate 3 [Source:HGNC        |             |             |       |  |
| Symbol;Acc:HGNC:30242]"              | -                                                | 26 48       | 30 102      | 139   |  |
| 218                                  | 0.24532097                                       | 0.438228199 | 0.359634    |       |  |
| 1.09205587                           | 1.646246265                                      | 1.953080545 |             |       |  |
| ENSG00000145781                      | 794.7518462                                      | 603.5666944 | 739.3446893 |       |  |
| 306.6466745                          | 400.6636317                                      | 339.0171448 | 712.55441   |       |  |
| 348.775817                           | 1.031277544                                      | 1.01E-06    | 4.02E-05    |       |  |
| COMMD10 5                            | 116084991                                        | 116412762   | +           | 2464  |  |
| protein_coding                       | COMM domain containing 10 [Source:HGNC           |             |             |       |  |

|                                     |                                                     |             |             |             |      |       |
|-------------------------------------|-----------------------------------------------------|-------------|-------------|-------------|------|-------|
| Symbol;Acc:HGNC:30201]              | -                                                   | 876         | 682         | 636         | 296  | 351   |
| 393                                 | 17.40973202                                         | 13.11505487 |             | 16.05917604 |      |       |
| 6.675181076                         | 8.756161702                                         | 7.416224448 |             |             |      |       |
| ENSG00000198642                     | 1175.797252                                         | 1244.303185 |             | 1105.529559 |      |       |
| 1754.93063                          | 2019.299044                                         | 2043.591898 |             | 1175.209999 |      |       |
| 1939.273858                         | -0.722257287                                        | 1.04E-06    |             | 4.14E-05    |      | KLHL9 |
| 9                                   | 21329671                                            | 21335380    |             | -           | 5710 |       |
| protein_coding                      | kelch like family member 9 [Source:HGNC             |             |             |             |      |       |
| Symbol;Acc:HGNC:18732]              | -                                                   | 1296        | 1406        | 951         | 1694 | 1769  |
| 2369                                | 11.1146957                                          | 11.66744207 |             | 10.36218294 |      |       |
| 16.4850148                          | 19.043163                                           | 19.29123229 |             |             |      |       |
| ENSG00000164985                     | 2628.306048                                         | 2316.917311 |             | 2454.019873 |      |       |
| 1692.772521                         | 1434.855228                                         | 1297.409124 |             | 2466.414411 |      |       |
| 1475.012291                         | 0.742038149                                         | 1.09E-06    |             | 4.33E-05    |      | PSIP1 |
| 9                                   | 15464066                                            | 15511019    |             | -           | 6768 |       |
| protein_coding                      | PC4 and SFRS1 interacting protein 1 [Source:HGNC    |             |             |             |      |       |
| Symbol;Acc:HGNC:9527]               | -                                                   | 2897        | 2618        | 2111        | 1634 | 1257  |
| 1504                                | 20.96123315                                         | 18.32887178 |             | 19.40594204 |      |       |
| 13.41540369                         | 11.41621891                                         | 10.33281144 |             |             |      |       |
| ENSG00000143870                     | 3476.585702                                         | 3061.198235 |             | 3879.234636 |      |       |
| 2424.166278                         | 1418.874342                                         | 1235.299113 |             | 3472.339524 |      |       |
| 1692.779911                         | 1.036634001                                         | 1.10E-06    |             | 4.34E-05    |      | PDIA6 |
| 2                                   | 10783391                                            | 10837977    |             | -           | 4101 |       |
| protein_coding                      | protein disulfide isomerase family A member 6       |             |             |             |      |       |
| [Source:HGNC Symbol;Acc:HGNC:30168] | -                                                   |             |             | 3832        | 3459 | 3337  |
| 2340                                | 1243                                                | 1432        | 45.75772403 | 39.96568247 |      |       |
| 50.62596144                         | 31.70575736                                         | 18.63068056 |             | 16.23619531 |      |       |
| ENSG00000175216                     | 7841.370099                                         | 5494.934906 |             | 7313.234969 |      |       |
| 4601.772054                         | 3800.026296                                         | 3030.450966 |             | 6883.179991 |      |       |
| 3810.749772                         | 0.8531361                                           | 1.11E-06    |             | 4.39E-05    |      | CKAP5 |
| 11                                  | 46743048                                            | 46846308    |             | -           | 8538 |       |
| protein_coding                      | cytoskeleton associated protein 5 [Source:HGNC      |             |             |             |      |       |
| Symbol;Acc:HGNC:28959]              | -                                                   | 8643        | 6209        | 6291        | 4442 | 3329  |
| 3513                                | 49.57206906                                         | 34.45814944 |             | 45.84272037 |      |       |
| 28.90909175                         | 23.96652149                                         | 19.131676   |             |             |      |       |
| ENSG00000187244                     | 85.2815908                                          | 119.4743457 |             | 227.8483634 |      |       |
| 22.79130689                         | 36.5277385                                          | 12.07694663 |             | 144.2014333 |      |       |
| 23.79866401                         | 2.609383169                                         | 1.15E-06    |             | 4.53E-05    |      | BCAM  |
| 19                                  | 44809059                                            | 44821421    |             | +           | 5009 |       |
| protein_coding                      | basal cell adhesion molecule (Lutheran blood group) |             |             |             |      |       |
| [Source:HGNC Symbol;Acc:HGNC:6722]  | -                                                   |             |             | 94          | 135  | 196   |
| 22                                  | 32                                                  | 14          | 0.918978827 | 1.277053753 |      |       |
| 2.434511813                         | 0.244052743                                         | 0.392686804 |             | 0.129959497 |      |       |
| ENSG00000176692                     | 547.0723325                                         | 509.7572082 |             | 780.0318971 |      |       |
| 260.0280922                         | 302.4953345                                         | 272.5939383 |             | 612.2871459 |      |       |
| 278.372455                          | 1.136227784                                         | 1.16E-06    |             | 4.56E-05    |      | FOXC2 |
| 16                                  | 86566829                                            | 86569728    |             | +           | 2900 |       |
| protein_coding                      | forkhead box C2 [Source:HGNC Symbol;Acc:HGNC:3801]  |             |             |             |      |       |
| Fork                                | 603                                                 | 576         | 671         | 251         | 265  | 316   |
| 10.18234945                         | 9.411328364                                         | 14.39565297 |             | 4.809365318 |      |       |



|                                                                                                          |                                                                                           |             |             |             |      |             |      |       |       |
|----------------------------------------------------------------------------------------------------------|-------------------------------------------------------------------------------------------|-------------|-------------|-------------|------|-------------|------|-------|-------|
| 5.616881172                                                                                              | 5.066640646                                                                               |             |             |             |      |             |      |       |       |
| ENSG00000155368                                                                                          | 1192.127769                                                                               | 1701.845679 | 1446.139612 |             |      |             |      |       |       |
| 882.6451577                                                                                              | 674.6216705                                                                               | 761.710277  | 1446.704354 |             |      |             |      |       |       |
| 772.9923684                                                                                              | 0.90403304                                                                                | 1.18E-06    | 4.64E-05    |             |      | DBI         |      |       |       |
| 2                                                                                                        | 119366921                                                                                 | 119372560   | +           | 2509        |      |             |      |       |       |
| protein_coding                                                                                           | "diazepam binding inhibitor, acyl-CoA binding protein [Source:HGNC Symbol;Acc:HGNC:2690]" |             |             | -           | 1314 | 1923        | 1244 |       |       |
| 852                                                                                                      | 591                                                                                       | 883         | 25.64622142 | 36.31659006 |      |             |      |       |       |
| 30.84796828                                                                                              | 18.86909092                                                                               | 14.4788537  | 16.36405989 |             |      |             |      |       |       |
| ENSG00000172137                                                                                          | 56.24955989                                                                               | 68.14462679 | 29.06229125 |             |      |             |      |       |       |
| 129.4960619                                                                                              | 275.0995306                                                                               | 236.3630984 | 51.15215931 |             |      |             |      |       |       |
| 213.652897                                                                                               | -2.054233367                                                                              | 1.21E-06    | 4.74E-05    |             |      | CALB2       |      |       |       |
| 16                                                                                                       | 71358713                                                                                  | 71390438    | +           | 1703        |      |             |      |       |       |
| protein_coding                                                                                           | calbindin 2 [Source:HGNC Symbol;Acc:HGNC:1435]                                            |             |             | -           |      |             |      |       |       |
| 62                                                                                                       | 77                                                                                        | 25          | 125         | 241         | 274  | 1.782812724 |      |       |       |
| 2.142409661                                                                                              | 0.91333943                                                                                | 4.078565194 | 8.698607897 |             |      |             |      |       |       |
| 7.481125373                                                                                              |                                                                                           |             |             |             |      |             |      |       |       |
| ENSG00000174840                                                                                          | 2021.355152                                                                               | 2227.5328   | 1814.649465 |             |      |             |      |       |       |
| 3059.214965                                                                                              | 3167.639823                                                                               | 3564.424535 | 2021.179139 |             |      |             |      |       |       |
| 3263.759775                                                                                              | -0.691074155                                                                              | 1.22E-06    | 4.76E-05    |             |      | PDE12       |      |       |       |
| 3                                                                                                        | 57556276                                                                                  | 57566844    | +           | 8947        |      |             |      |       |       |
| protein_coding                                                                                           | phosphodiesterase 12 [Source:HGNC Symbol;Acc:HGNC:25386]                                  |             |             | -           | 2228 | 2517        | 1561 | 2953  | 2775  |
| 4132                                                                                                     | 12.19456836                                                                               | 13.33006352 | 10.8550621  |             |      |             |      |       |       |
| 18.33994603                                                                                              | 19.06482883                                                                               | 21.47404672 |             |             |      |             |      |       |       |
| ENSG00000274012                                                                                          | 275.8042937                                                                               | 878.800187  | 381.2972612 |             |      |             |      |       |       |
| 95.30910153                                                                                              | 81.0459198                                                                                | 210.483927  | 511.9672473 |             |      |             |      |       |       |
| 128.9463161                                                                                              | 1.985454239                                                                               | 1.27E-06    | 4.96E-05    |             |      | RN7SL2      |      |       |       |
| 14                                                                                                       | 49862550                                                                                  | 49862849    | -           | 300         |      |             |      |       |       |
| misc_RNA                                                                                                 | "RNA, 7SL, cytoplasmic 2 [Source:HGNC Symbol;Acc:HGNC:23134]"                             |             |             | -           | 304  | 993         | 328  | 92    | 71    |
| 244                                                                                                      | 49.62277103                                                                               | 156.8391336 | 68.02357233 |             |      |             |      |       |       |
| 17.04035414                                                                                              | 14.54736897                                                                               | 37.81808989 |             |             |      |             |      |       |       |
| ENSG00000188643                                                                                          | 6137.552785                                                                               | 8640.20768  | 8233.928356 |             |      |             |      |       |       |
| 11028.9206                                                                                               | 13639.68585                                                                               | 14179.19799 | 7670.56294  |             |      |             |      |       |       |
| 12949.26815                                                                                              | -0.755546131                                                                              | 1.28E-06    | 4.99E-05    |             |      |             |      |       |       |
| S100A16 1                                                                                                | 153606886                                                                                 | 153613145   | -           | 1701        |      |             |      |       |       |
| protein_coding                                                                                           | S100 calcium binding protein A16 [Source:HGNC Symbol;Acc:HGNC:20441]                      |             |             | -           | 6765 | 9763        | 7083 | 10646 | 11949 |
| 16437                                                                                                    | 194.756594                                                                                | 271.9602405 | 259.0715806 |             |      |             |      |       |       |
| 347.7716628                                                                                              | 431.7920159                                                                               | 449.313285  |             |             |      |             |      |       |       |
| ENSG00000198840                                                                                          | 7963.848979                                                                               | 12545.69129 | 8480.376586 |             |      |             |      |       |       |
| 13355.70584                                                                                              | 21259.14381                                                                               | 21002.67284 | 9663.305619 |             |      |             |      |       |       |
| 18539.17416                                                                                              | -0.939926377                                                                              | 1.28E-06    | 4.99E-05    |             |      | MT-ND3      |      |       |       |
| MT                                                                                                       | 10059                                                                                     | 10404       | +           | 346         |      |             |      |       |       |
| mitochondrially encoded NADH:ubiquinone oxidoreductase core subunit 3 [Source:HGNC Symbol;Acc:HGNC:7458] |                                                                                           |             |             | -           | 8778 | 14176       | 7295 |       |       |
| 12892                                                                                                    | 18624                                                                                     | 24347       | 1242.362006 | 1941.350923 |      |             |      |       |       |
| 1311.765015                                                                                              | 2070.409452                                                                               | 3308.599687 | 3271.902662 |             |      |             |      |       |       |
| ENSG00000128708                                                                                          | 1560.471661                                                                               | 1570.866397 | 1527.514028 |             |      |             |      |       |       |

|                         |                                                     |             |             |                        |
|-------------------------|-----------------------------------------------------|-------------|-------------|------------------------|
| 1066.011581             | 687.1780806                                         | 703.9134609 | 1552.950695 |                        |
| 819.0343743             | 0.923237303                                         | 1.34E-06    | 5.19E-05    | HAT1                   |
| 2                       | 171922448                                           | 171983682   | + 6790      |                        |
| protein_coding          | histone acetyltransferase 1 [Source:HGNC            |             |             |                        |
| Symbol;Acc:HGNC:4821]   | -                                                   | 1720 1775   | 1314 1029   | 602                    |
| 816                     | 12.40473115                                         | 12.38668302 | 12.04016497 |                        |
| 8.42088321              | 5.449718593                                         | 5.587935733 |             |                        |
| ENSG00000111247         | 781.1430817                                         | 699.146171  | 712.6073814 |                        |
| 437.1787048             | 334.4571057                                         | 263.9675479 | 730.9655447 |                        |
| 345.2011195             | 1.083895253                                         | 1.35E-06    | 5.23E-05    |                        |
| RAD51AP1                | 12 4538798                                          | 4560048 +   | 2558        | protein_coding         |
|                         | RAD51 associated protein 1 [Source:HGNC             |             |             | Symbol;Acc:HGNC:16956] |
| -                       | 861 790                                             | 613 422     | 293 306     |                        |
| 16.48281161             | 14.63366106                                         | 14.90962708 | 9.166930832 |                        |
| 7.040677315             | 5.562267928                                         |             |             |                        |
| ENSG00000143384         | 10721.89192                                         | 10837.65065 | 10683.29826 |                        |
| 14754.2633              | 16064.2145                                          | 16058.88847 | 10747.61361 |                        |
| 15625.78876             | -0.539910569                                        | 1.35E-06    | 5.23E-05    | MCL1                   |
| 1                       | 150574551                                           | 150579738   | - 4371      |                        |
| protein_coding          | "MCL1, BCL2 family apoptosis regulator [Source:HGNC |             |             |                        |
| Symbol;Acc:HGNC:6943]"  | -                                                   | 11818 12246 | 9190 14242  | 14073                  |
| 18616                   | 132.4011821                                         | 132.7516383 | 130.8101825 |                        |
| 181.0515381             | 197.9033936                                         | 198.032551  |             |                        |
| ENSG00000135862         | 5987.856375                                         | 4764.813904 | 7398.09686  |                        |
| 3807.184219             | 3505.521404                                         | 3138.280847 | 6050.255713 |                        |
| 3483.662157             | 0.796266214                                         | 1.37E-06    | 5.29E-05    | LAMC1                  |
| 1                       | 183023460                                           | 183145592   | + 8406      |                        |
| protein_coding          | laminin subunit gamma 1 [Source:HGNC                |             |             |                        |
| Symbol;Acc:HGNC:6492]   | -                                                   | 6600 5384   | 6364 3675   | 3071                   |
| 3638                    | 38.44883927                                         | 30.34884072 | 47.10289844 |                        |
| 24.29293574             | 22.45627877                                         | 20.12353749 |             |                        |
| ENSG00000109917         | 3842.207841                                         | 3809.904134 | 3191.039579 |                        |
| 5092.821121             | 5970.002261                                         | 6242.918771 | 3614.383851 |                        |
| 5768.580718             | -0.674237072                                        | 1.38E-06    | 5.31E-05    | ZPR1                   |
| 11                      | 116773799                                           | 116788050   | - 7069      |                        |
| protein_coding          | ZPR1 zinc finger [Source:HGNC                       |             |             |                        |
| Symbol;Acc:HGNC:13051]" | -                                                   | 4235 4305   | 2745 4916   | 5230 7237              |
| 29.33756849             | 28.85636449                                         | 24.15968201 | 38.64256412 |                        |
| 45.47692248             | 47.60270249                                         |             |             |                        |
| ENSG00000148834         | 1803.61492                                          | 2655.870455 | 2683.030728 |                        |
| 3505.717387             | 4766.869874                                         | 4777.295033 | 2380.838701 |                        |
| 4349.960765             | -0.869821472                                        | 1.39E-06    | 5.34E-05    | GST01                  |
| 10                      | 104235356                                           | 104267459   | + 1691      |                        |
| protein_coding          | glutathione S-transferase omega 1 [Source:HGNC      |             |             |                        |
| Symbol;Acc:HGNC:13312]" | -                                                   | 1988 3001   | 2308 3384   | 4176                   |
| 5538                    | 57.57069284                                         | 84.0908667  | 84.91786048 |                        |
| 111.1984645             | 151.7973684                                         | 152.2791212 |             |                        |
| ENSG00000164919         | 995.2543097                                         | 1410.682274 | 1179.929025 |                        |
| 621.5810969             | 592.4342588                                         | 708.2266562 | 1195.288536 |                        |
| 640.7473373             | 0.898875068                                         | 1.42E-06    | 5.44E-05    | COX6C                  |

|                                                                |                                                 |             |             |                |           |
|----------------------------------------------------------------|-------------------------------------------------|-------------|-------------|----------------|-----------|
| 8                                                              | 99873200                                        | 99894062    | -           | 3066           |           |
| protein_coding                                                 | cytochrome c oxidase subunit 6C [Source:HGNC    |             |             |                |           |
| Symbol;Acc:HGNC:2285]                                          | -                                               | 1097        | 1594        | 1015           | 600 519   |
| 821                                                            | 17.52117231                                     | 24.63443508 |             | 20.59684678    |           |
| 10.87404544                                                    | 10.40501157                                     | 12.45093669 |             |                |           |
| ENSG00000275832                                                | 2404.21506                                      | 2277.092529 |             | 2796.95491     |           |
| 1627.506505                                                    | 1495.354295                                     | 1480.288602 |             | 2492.754166    |           |
| 1534.383134                                                    | 0.699729884                                     | 1.44E-06    |             | 5.50E-05       |           |
| ARHGAP23                                                       | 17                                              | 38419280    | 38512392    | +              | 8133      |
| protein_coding                                                 | Rho GTPase activating protein 23 [Source:HGNC   |             |             |                |           |
| Symbol;Acc:HGNC:29293]                                         | -                                               | 2650        | 2573        | 2406           | 1571 1310 |
| 1716                                                           | 15.95599109                                     | 14.99047708 |             | 18.4056728     |           |
| 10.73340351                                                    | 9.900745192                                     | 9.810644285 |             |                |           |
| ENSG00000133112                                                | 29424.87058                                     | 36395.42567 |             | 42229.83417    |           |
| 53202.16206                                                    | 64777.37827                                     | 58498.14158 |             | 36016.71014    |           |
| 58825.89397                                                    | -0.707816522                                    | 1.46E-06    |             | 5.55E-05       | TPT1      |
| 13                                                             | 45333471                                        | 45341370    |             | -              | 7269      |
| protein_coding                                                 | "tumor protein, translationally-controlled 1    |             |             |                |           |
| [Source:HGNC                                                   | Symbol;Acc:HGNC:12022]"                         | -           | 32433       | 41125          | 36327     |
| 51355                                                          | 56748                                           | 67813       | 218.4948157 | 268.0758446    |           |
| 310.9293448                                                    | 392.5727121                                     | 479.8696148 | 433.7797828 |                |           |
| ENSG00000124920                                                | 571.5681086                                     | 496.4822809 | 763.757014  |                |           |
| 293.1790841                                                    | 281.9484816                                     | 157.8629453 | 610.6024678 |                |           |
| 244.3301703                                                    | 1.323156796                                     | 1.47E-06    | 5.58E-05    |                | MYRF      |
| 11                                                             | 61752642                                        | 61788518    | +           | 10680          |           |
| protein_coding                                                 | myelin regulatory factor [Source:HGNC           |             |             |                |           |
| Symbol;Acc:HGNC:1181]                                          | NDT80/PhoG                                      | 630         | 561         | 657            | 283       |
| 247                                                            | 183                                             | 2.888670327 | 2.488960758 | 3.827374539    |           |
| 1.472404806                                                    | 1.421585748                                     | 0.796729422 |             |                |           |
| ENSG00000128951                                                | 2101.193237                                     | 2442.586623 |             | 2973.65364     |           |
| 1594.355514                                                    | 1421.157326                                     | 1115.392286 |             | 2505.811167    |           |
| 1376.968375                                                    | 0.863924895                                     | 1.54E-06    |             | 5.84E-05       | DUT       |
| 15                                                             | 48331011                                        | 48343373    | +           | 3674           |           |
| protein_coding                                                 | deoxyuridine triphosphatase [Source:HGNC        |             |             |                |           |
| Symbol;Acc:HGNC:3078]                                          | -                                               | 2316        | 2760        | 2558           | 1539 1245 |
| 1293                                                           | 30.86939277                                     | 35.59560435 |             | 43.31798382    |           |
| 23.27616952                                                    | 20.82943835                                     | 16.36403467 |             |                |           |
| ENSG00000142185                                                | 74.39457921                                     | 87.61452016 |             | 156.9363727    |           |
| 10.35968495                                                    | 17.12237742                                     | 0           | 106.3151574 | 9.160687457    |           |
| 3.567370168                                                    | 1.56E-06                                        |             | 5.90E-05    | TRPM2          | 21        |
| 44350163                                                       | 44443081                                        | +           | 6705        | protein_coding |           |
| transient receptor potential cation channel subfamily M member |                                                 |             |             |                |           |
| 2 [Source:HGNC                                                 | Symbol;Acc:HGNC:12339]                          | -           | 82          | 99             | 135       |
| 10                                                             | 15                                              | 0           | 0.598885439 | 0.699621026    |           |
| 1.252684873                                                    | 0.082873038                                     | 0.137511759 | 0           |                |           |
| ENSG00000198157                                                | 577.9188653                                     | 465.5074505 |             | 428.9594188    |           |
| 268.3158402                                                    | 144.9694622                                     | 117.3189102 |             | 490.7952449    |           |
| 176.8680708                                                    | 1.474470234                                     | 1.59E-06    |             | 6.00E-05       | HMGNS     |
| X                                                              | 81113701                                        | 81201942    |             | -              | 2416      |
| protein_coding                                                 | high mobility group nucleosome binding domain 5 |             |             |                |           |

|                                         |                                                     |                |                 |             |
|-----------------------------------------|-----------------------------------------------------|----------------|-----------------|-------------|
| [Source:HGNC Symbol;Acc:HGNC:8013]      | -                                                   | 637            | 526             | 369         |
| 259                                     | 127 136                                             | 12.91133608    | 10.31609315     |             |
| 9.502465091                             | 5.956825497                                         | 3.231127914    | 2.617417469     |             |
| ENSG00000163156                         | 1015.213831                                         | 1111.553912    | 1245.028557     |             |
| 1636.830222                             | 2043.270372                                         | 2150.55914     | 1123.9321       |             |
| 1943.553245                             | -0.790908141                                        | 1.59E-06       | 6.01E-05        | SCNM1       |
| 1                                       | 151156664                                           | 151170297      | + 3265          |             |
| protein_coding                          | sodium channel modifier 1 [Source:HGNC              |                |                 |             |
| Symbol;Acc:HGNC:23136]                  | -                                                   | 1119 1256      | 1071 1580       | 1790        |
| 2493                                    | 16.78323148                                         | 18.22774291    | 20.40859615     |             |
| 26.88969926                             | 33.6990149                                          | 35.50341353    |                 |             |
| ENSG00000179772                         | 48.0843012                                          | 10.61994184    | 40.68720775     | 0           |
| 0                                       | 0 33.13048359                                       | 0              | 7.481805536     |             |
| 1.65E-06                                | 6.20E-05                                            | FOXS1 20       | 31844301        |             |
| 31845619                                | - 1319                                              | protein_coding | forkhead box S1 |             |
| [Source:HGNC Symbol;Acc:HGNC:3735]      | Fork                                                | 53             | 12              | 35          |
| 0                                       | 0 0                                                 | 1.967703951    | 0.43108498      |             |
| 1.650935459                             | 0 0                                                 | 0              |                 |             |
| ENSG00000114315                         | 382.8599076                                         | 212.3988367    | 415.009519      |             |
| 80.8055426                              | 115.2906746                                         | 135.4343301    | 336.7560878     |             |
| 110.5101825                             | 1.604465011                                         | 1.65E-06       | 6.20E-05        | HES1        |
| 3                                       | 194136145                                           | 194138732      | + 2062          |             |
| protein_coding                          | hes family bHLH transcription factor 1 [Source:HGNC |                |                 |             |
| Symbol;Acc:HGNC:5192]                   | bHLH                                                | 422 240        | 357 78          | 101         |
| 157                                     | 10.02195558                                         | 5.515044507    | 10.77175338     |             |
| 2.101928725                             | 3.010787283                                         | 3.540315851    |                 |             |
| ENSG00000167703                         | 68.04382245                                         | 92.03949592    | 162.748831      |             |
| 11.39565344                             | 18.26386925                                         | 21.56597613    | 107.6107165     |             |
| 17.07516628                             | 2.648266592                                         | 1.77E-06       | 6.63E-05        |             |
| SLC43A2 17                              | 1569267 1628886                                     | - 10606        | protein_coding  | solute      |
| carrier family 43 member 2 [Source:HGNC | Symbol;Acc:HGNC:23087]                              | -              |                 |             |
| 75                                      | 104 140                                             | 11 16          | 25              | 0.346288703 |
| 0.464630973                             | 0.821264895                                         | 0.057630595    | 0.092729031     |             |
| 0.109602233                             |                                                     |                |                 |             |
| ENSG00000176136                         | 17.23776835                                         | 11.50493699    | 5.812458249     |             |
| 46.61858227                             | 97.02680539                                         | 139.7475253    | 11.51838786     |             |
| 94.46430433                             | -3.021928092                                        | 1.80E-06       | 6.72E-05        | MC5R        |
| 18                                      | 13824149                                            | 13827323       | + 1906          |             |
| protein_coding                          | melanocortin 5 receptor [Source:HGNC                |                |                 |             |
| Symbol;Acc:HGNC:6933]                   | -                                                   | 19 13          | 5 45            | 85          |
| 162                                     | 0.48815685                                          | 0.323181801    | 0.163212702     |             |
| 1.311902806                             | 2.74121683                                          | 3.952056423    |                 |             |
| ENSG00000197256                         | 3160.862365                                         | 2948.80385     | 3788.560287     |             |
| 2094.728297                             | 1950.809534                                         | 1256.865089    | 3299.408834     |             |
| 1767.46764                              | 0.900939043                                         | 1.81E-06       | 6.75E-05        | KANK2       |
| 19                                      | 11164267                                            | 11197791       | - 7638          |             |
| protein_coding                          | KN motif and ankyrin repeat domains 2 [Source:HGNC  |                |                 |             |
| Symbol;Acc:HGNC:29300]                  | -                                                   | 3484 3332      | 3259 2022       | 1709        |
| 1457                                    | 22.33711992                                         | 20.67053796    | 26.5467618      |             |
| 14.7100294                              | 13.75339034                                         | 8.869740539    |                 |             |

|                        |                                               |             |                |             |
|------------------------|-----------------------------------------------|-------------|----------------|-------------|
| ENSG00000158402        | 220.4619847                                   | 170.8040646 | 301.0853373    |             |
| 65.26601518            | 86.75337894                                   | 37.09347895 | 230.7837955    |             |
| 63.03762436            | 1.87790191                                    | 1.82E-06    | 6.77E-05       | CDC25C      |
| 5                      | 138285265                                     | 138338355   | - 3338         |             |
| protein_coding         | cell division cycle 25C [Source:HGNC          |             |                |             |
| Symbol;Acc:HGNC:1727]  | -                                             | 243 193     | 259 63         | 76          |
| 43                     | 3.564910449                                   | 2.739664722 | 4.827477723    |             |
| 1.048736204            | 1.399505534                                   | 0.598981131 |                |             |
| ENSG00000105373        | 4525.367818                                   | 5418.825323 | 5696.209084    |             |
| 7040.441891            | 9042.898263                                   | 10165.33851 | 5213.467408    |             |
| 8749.559555            | -0.74716208                                   | 1.84E-06    | 6.85E-05       | NOP53       |
| 19                     | 47745522                                      | 47757058    | + 5341         |             |
| protein_coding         | NOP53 ribosome biogenesis factor [Source:HGNC |             |                |             |
| Symbol;Acc:HGNC:4333]  | -                                             | 4988 6123   | 4900 6796      | 7922        |
| 11784                  | 45.73330108                                   | 54.32104578 | 57.07952477    |             |
| 70.70381305            | 91.17160921                                   | 102.5890892 |                |             |
| ENSG00000187601        | 114.3136217                                   | 115.9343651 | 58.12458249    |             |
| 315.9703909            | 230.5813493                                   | 339.8797838 | 96.12418976    |             |
| 295.4771747            | -1.615076107                                  | 1.96E-06    | 7.25E-05       | MAGEH1      |
| X                      | 55452105                                      | 55453566    | + 1462         |             |
| protein_coding         | MAGE family member H1 [Source:HGNC            |             |                |             |
| Symbol;Acc:HGNC:24092] | -                                             | 126 131     | 50 305         | 202         |
| 394                    | 4.220382913                                   | 4.245710363 | 2.127793502    |             |
| 11.59216383            | 8.492808999                                   | 12.53083084 |                |             |
| ENSG00000092841        | 4808.43012                                    | 6822.427635 | 8093.266867    |             |
| 3329.602743            | 4222.378272                                   | 3319.435046 | 6574.708207    |             |
| 3623.805354            | 0.859420001                                   | 1.96E-06    | 7.25E-05       | MYL6        |
| 12                     | 56158161                                      | 56163496    | + 4609         |             |
| protein_coding         | myosin light chain 6 [Source:HGNC             |             |                |             |
| Symbol;Acc:HGNC:7587]  | -                                             | 5300 7709   | 6962 3214      | 3699        |
| 3848                   | 56.31159712                                   | 79.25337731 | 93.97972231    |             |
| 38.74817103            | 49.33157523                                   | 38.82034345 |                |             |
| ENSG00000167549        | 156.9544171                                   | 175.2290403 | 94.16182364    |             |
| 43.51067679            | 25.11282022                                   | 23.29125422 | 142.1150937    |             |
| 30.63825041            | 2.218024511                                   | 1.97E-06    | 7.25E-05       | COR06       |
| 17                     | 29614756                                      | 29622907    | - 4321         |             |
| protein_coding         | coronin 6 [Source:HGNC Symbol;Acc:HGNC:21356] |             |                | -           |
| 173                    | 198 81                                        | 42 22       | 27             | 1.960606871 |
|                        | 2.171237668                                   | 1.166292812 | 0.540103595    | 0.312957796 |
|                        | 0.290543067                                   |             |                |             |
| ENSG00000164877        | 1316.421152                                   | 1439.887114 | 1145.054275    |             |
| 661.9838682            | 803.610247                                    | 432.1821617 | 1300.45418     |             |
| 632.5920923            | 1.04184188                                    | 1.97E-06    | 7.25E-05       |             |
| MICALL2                | 1428465 1459502                               | - 8843      | protein_coding | MICAL       |
| like 2 [Source:HGNC    | Symbol;Acc:HGNC:29672]                        |             |                | - 1451 1627 |
| 985                    | 639 704                                       | 501         | 8.035195929    | 8.717949897 |
|                        | 6.930163041                                   | 4.015256343 | 4.893509033    | 2.634323578 |
| ENSG00000120279        | 10.88701159                                   | 2.654985459 | 3.48747495     |             |
| 22.79130689            | 131.2715602                                   | 84.53862644 | 5.676490667    |             |
| 79.53383119            | -3.794748898                                  | 1.99E-06    | 7.33E-05       | MYCT1       |

|                                             |                                                         |             |       |             |                |
|---------------------------------------------|---------------------------------------------------------|-------------|-------|-------------|----------------|
| 6                                           | 152697895                                               | 152724567   | +     | 3030        |                |
| protein_coding                              | MYC target 1 [Source:HGNC Symbol;Acc:HGNC:23172]        |             |       |             |                |
| -                                           | 12                                                      | 3           | 3     | 22          | 115 98         |
| 0.19393996                                  | 0.046914281                                             | 0.061600675 |       | 0.403452207 |                |
| 2.332934642                                 | 1.503884438                                             |             |       |             |                |
| ENSG00000226674                             | 101.6121082                                             | 132.749273  |       | 87.18687374 |                |
| 15.53952742                                 | 15.98088559                                             | 27.60444945 |       | 107.1827516 |                |
| 19.70828749                                 | 2.434168278                                             | 2.03E-06    |       | 7.43E-05    | TEX41          |
| 2                                           | 144667967                                               | 145262988   | +     | 15056       |                |
| lincRNA                                     | testis expressed 41 [Source:HGNC Symbol;Acc:HGNC:48667] |             |       |             | -              |
| 112                                         | 150                                                     | 75          | 15    | 14          | 32 0.364281487 |
| 0.472071839                                 | 0.309926352                                             | 0.055359696 |       | 0.057156521 |                |
| 0.098826039                                 |                                                         |             |       |             |                |
| ENSG00000105968                             | 3964.686721                                             | 3838.223979 |       | 4702.278724 |                |
| 2896.567912                                 | 2496.442628                                             | 2422.290439 |       | 4168.396475 |                |
| 2605.100326                                 | 0.677979498                                             | 2.04E-06    |       | 7.49E-05    | H2AFV          |
| 7                                           | 44826791                                                | 44848083    | -     | 4749        |                |
| protein_coding                              | H2A histone family member V [Source:HGNC                |             |       |             |                |
| Symbol;Acc:HGNC:20664]                      | -                                                       | 4370        | 4337  | 4045        | 2796 2187      |
| 2808                                        | 45.06173933                                             | 43.27267006 |       | 52.99357311 |                |
| 32.71500878                                 | 28.30700839                                             | 27.49324182 |       |             |                |
| ENSG00000120708                             | 29736.96491                                             | 24710.83467 |       | 52539.97261 |                |
| 9104.091133                                 | 10591.90267                                             | 5268.13665  |       | 35662.59073 |                |
| 8321.376819                                 | 2.099541131                                             | 2.05E-06    |       | 7.51E-05    | TGFBI          |
| 5                                           | 136028895                                               | 136063818   | +     | 7810        |                |
| protein_coding                              | transforming growth factor beta induced [Source:HGNC    |             |       |             |                |
| Symbol;Acc:HGNC:11771]                      | -                                                       | 32777       | 27922 | 45196       | 8788 9279      |
| 6107                                        | 205.5165736                                             | 169.4033248 |       | 360.0441946 |                |
| 62.52461958                                 | 73.02936107                                             | 36.35866296 |       |             |                |
| ENSG00000111252                             | 3292.413756                                             | 2513.386235 |       | 3721.135771 |                |
| 2169.318028                                 | 1471.382967                                             | 1400.06317  |       | 3175.645254 |                |
| 1680.254722                                 | 0.918264641                                             | 2.23E-06    |       | 8.14E-05    | SH2B3          |
| 12                                          | 111405948                                               | 111451623   | +     | 5682        |                |
| protein_coding                              | SH2B adaptor protein 3 [Source:HGNC                     |             |       |             |                |
| Symbol;Acc:HGNC:29605]                      | -                                                       | 3629        | 2840  | 3201        | 2094 1289      |
| 1623                                        | 31.27623174                                             | 23.68337281 |       | 35.05026383 |                |
| 20.47799778                                 | 13.94437483                                             | 13.28153615 |       |             |                |
| ENSG00000170540                             | 3560.052791                                             | 2765.609853 |       | 3663.011189 |                |
| 2307.101838                                 | 1752.189956                                             | 1602.783346 |       | 3329.557944 |                |
| 1887.35838                                  | 0.818984203                                             | 2.24E-06    |       | 8.15E-05    |                |
| ARL6IP1                                     | 18791667                                                | 18801678    | -     | 3666        |                |
| protein_coding                              | ADP ribosylation factor like GTPase 6 interacting       |             |       |             |                |
| protein 1 [Source:HGNC Symbol;Acc:HGNC:697] | -                                                       |             |       | 3924        | 3125           |
| 3151                                        | 2227                                                    | 1535        | 1858  | 52.41616244 | 40.39094386    |
| 53.47647709                                 | 33.75513118                                             | 25.73731746 |       | 23.56591284 |                |
| ENSG00000164032                             | 6020.51741                                              | 7587.063448 |       | 7560.845691 |                |
| 4866.979989                                 | 4432.412769                                             | 3846.507503 |       | 7056.142183 |                |
| 4381.966754                                 | 0.687387715                                             | 2.28E-06    |       | 8.30E-05    | H2AFZ          |
| 4                                           | 99948086                                                | 99950388    | -     | 2303        |                |
| protein_coding                              | H2A histone family member Z [Source:HGNC                |             |       |             |                |

|                                                                     |              |             |      |             |             |       |
|---------------------------------------------------------------------|--------------|-------------|------|-------------|-------------|-------|
| Symbol;Acc:HGNC:4741]                                               | -            | 6636        | 8573 | 6504        | 4698        | 3883  |
| 4459                                                                | 141.1045841  | 176.3864935 |      | 175.7087711 |             |       |
| 113.352504                                                          | 103.638427   | 90.0273678  |      |             |             |       |
| ENSG00000243742                                                     | 108.8701159  | 144.25421   |      | 33.71225785 |             |       |
| 330.4739499                                                         | 313.9102527  | 420.9678541 |      | 95.61219457 |             |       |
| 355.1173522                                                         | -1.886188595 | 2.29E-06    |      | 8.31E-05    |             |       |
| RPLP0P2 11                                                          | 61615036     | 61639449    |      | +           | 3909        |       |
| transcribed_processed_pseudogene                                    |              |             |      |             |             |       |
| stalk subunit P0 pseudogene 2                                       |              |             |      |             |             |       |
| [Source:HGNC Symbol;Acc:HGNC:17960]                                 |              |             |      |             |             |       |
| -                                                                   | 120          | 163         | 29   | 319         | 275         | 488   |
| 1.50329516                                                          | 1.975824539  | 0.461571701 |      | 4.534579875 |             |       |
| 4.324285741                                                         | 5.804772047  |             |      |             |             |       |
| ENSG00000079616                                                     | 1543.233893  | 1526.616639 |      | 1841.386773 |             |       |
| 907.5084015                                                         | 1071.860827  | 699.6002657 |      | 1637.079102 |             |       |
| 892.9898313                                                         | 0.875272193  | 2.41E-06    |      | 8.72E-05    |             | KIF22 |
| 16                                                                  | 29790719     | 29805385    |      | +           | 4312        |       |
| protein_coding kinesin family member 22                             |              |             |      |             |             |       |
| [Source:HGNC                                                        |              |             |      |             |             |       |
| Symbol;Acc:HGNC:6391]                                               | -            | 1701        | 1725 | 1584        | 876         | 939   |
| 811                                                                 | 19.31764786  | 18.95556737 |      | 22.85510768 |             |       |
| 11.28853016                                                         | 13.38548773  | 8.745267942 |      |             |             |       |
| ENSG00000270872                                                     | 244.0505098  | 123.0143263 |      | 151.1239145 |             |       |
| 37.29486582                                                         | 46.80116496  | 50.03306463 |      | 172.7295835 |             |       |
| 44.70969847                                                         | 1.949140186  | 2.42E-06    |      | 8.73E-05    |             |       |
| SRGAP2D 1                                                           | 143975087    | 144068350   |      | +           | 1021        |       |
| unprocessed_pseudogene SLIT-R0B0 Rho GTPase activating protein 2D   |              |             |      |             |             |       |
| (pseudogene) [Source:HGNC Symbol;Acc:HGNC:43932]                    |              |             |      |             |             |       |
| 139                                                                 | 130          | 36          | 41   | 58          | 12.90194605 | 269   |
| 6.450828544                                                         | 7.921810637  | 1.959245249 |      | 2.468342806 |             |       |
| 2.641394502                                                         |              |             |      |             |             |       |
| ENSG00000102038                                                     | 4436.457224  | 3136.422823 |      | 3981.533901 |             |       |
| 2572.309773                                                         | 1785.293219  | 1145.584652 |      | 3851.471316 |             |       |
| 1834.395881                                                         | 1.070499647  | 2.44E-06    |      | 8.79E-05    |             |       |
| SMARCA1 X                                                           | 129446501    | 129523500   |      | -           | 4363        |       |
| protein_coding "SWI/SNF related, matrix associated, actin dependent |              |             |      |             |             |       |
| regulator of chromatin, subfamily a, member 1                       |              |             |      |             |             |       |
| [Source:HGNC                                                        |              |             |      |             |             |       |
| Symbol;Acc:HGNC:11097]"                                             | -            | 4890        | 3544 | 3425        | 2483        | 1564  |
| 1328                                                                | 54.8848308   | 38.48885053 |      | 48.84073708 |             |       |
| 31.62303511                                                         | 22.03428162  | 14.15284923 |      |             |             |       |
| ENSG00000210135                                                     | 493.5445255  | 525.687121  |      | 475.4590848 |             |       |
| 687.8830806                                                         | 1103.822598  | 1764.959487 |      | 498.2302438 |             |       |
| 1185.555055                                                         | -1.251179976 | 2.46E-06    |      | 8.86E-05    |             | MT-TN |
| MT                                                                  | 5657         | 5729        | -    | 73          | Mt_tRNA     |       |
| mitochondrially encoded tRNA asparagine                             |              |             |      |             |             |       |
| [Source:HGNC                                                        |              |             |      |             |             |       |
| Symbol;Acc:HGNC:7493]                                               | -            | 544         | 594  | 409         | 664         | 967   |
| 2046                                                                | 364.9259297  | 385.5582725 |      | 348.5838759 |             |       |
| 505.4256321                                                         | 814.2372639  | 1303.20815  |      |             |             |       |
| ENSG00000134014                                                     | 1270.151352  | 1400.062332 |      | 1371.740147 |             |       |
| 1893.750409                                                         | 2311.520952  | 2487.851007 |      | 1347.317944 |             |       |
| 2231.040789                                                         | -0.727908043 | 2.49E-06    |      | 8.93E-05    |             | ELP3  |
| 8                                                                   | 28089673     | 28191156    |      | +           | 5390        |       |

|                                     |                                                        |             |             |                |       |  |
|-------------------------------------|--------------------------------------------------------|-------------|-------------|----------------|-------|--|
| protein_coding                      | elongator acetyltransferase complex subunit 3          |             |             |                |       |  |
| [Source:HGNC Symbol;Acc:HGNC:20696] | -                                                      | 1400        | 1582        | 1180           |       |  |
| 1828                                | 2025                                                   | 2884        | 12.71943892 | 13.90734264    |       |  |
| 13.62072074                         | 18.84514441                                            | 23.09317372 | 24.87926288 |                |       |  |
| ENSG00000171848                     | 3549.165779                                            | 3197.487488 | 3732.760688 |                |       |  |
| 2481.144545                         | 1535.306509                                            | 1161.974794 | 3493.137985 |                |       |  |
| 1726.141949                         | 1.017264416                                            | 2.53E-06    | 9.08E-05    | RRM2           |       |  |
| 2                                   | 10120698                                               | 10131419    | +           | 5323           |       |  |
| protein_coding                      | ribonucleotide reductase regulatory subunit M2         |             |             |                |       |  |
| [Source:HGNC Symbol;Acc:HGNC:10452] | -                                                      | 3912        | 3613        | 3211           |       |  |
| 2395                                | 1345                                                   | 1347        | 35.98910641 | 32.16162148    |       |  |
| 37.53104751                         | 25.00121387                                            | 15.53149204 | 11.76636043 |                |       |  |
| ENSG00000178343                     | 69.85832438                                            | 44.24975766 | 61.61205744 |                |       |  |
| 5.179842475                         | 5.707459141                                            | 0           | 58.57337983 | 3.629100538    |       |  |
| 4.061754817                         | 2.54E-06                                               | 9.09E-05    | SHISA3      | 4              |       |  |
| 42397839                            | 42402487                                               | +           | 1971        | protein_coding |       |  |
| shisa family member 3               | [Source:HGNC Symbol;Acc:HGNC:25159]                    |             |             |                |       |  |
| -                                   | 77                                                     | 50          | 53          | 5              | 5     |  |
| 1.913078471                         | 1.202014816                                            | 1.673000582 | 0.140959848 |                |       |  |
| 0.155930381                         | 0                                                      |             |             |                |       |  |
| ENSG00000128564                     | 63.50756762                                            | 65.48964133 | 89.51185704 |                |       |  |
| 165.7549592                         | 202.0440536                                            | 412.3414636 | 72.83635533 |                |       |  |
| 260.0468255                         | -1.841679545                                           | 2.56E-06    | 9.12E-05    | VGF            |       |  |
| 7                                   | 101162509                                              | 101165593   | -           | 2704           |       |  |
| protein_coding                      | VGF nerve growth factor inducible [Source:HGNC         |             |             |                |       |  |
| Symbol;Acc:HGNC:12684]              | -                                                      | 70          | 74          | 77             | 160   |  |
| 478                                 | 1.267710351                                            | 1.296735717 | 1.771702853 |                | 177   |  |
| 3.287951018                         | 4.023592031                                            | 8.219629222 |             |                |       |  |
| ENSG00000182158                     | 1691.115801                                            | 1085.889053 | 1677.475451 |                |       |  |
| 954.1269838                         | 432.6254029                                            | 420.9678541 | 1484.826768 |                |       |  |
| 602.5734136                         | 1.301180652                                            | 2.59E-06    | 9.21E-05    |                |       |  |
| CREB3L2                             | 7                                                      | 137874979   | 138002067   | -              | 8788  |  |
| protein_coding                      | cAMP responsive element binding protein 3 like 2       |             |             |                |       |  |
| [Source:HGNC Symbol;Acc:HGNC:23720] | TF_bZIP                                                | 1864        | 1227        | 1443           |       |  |
| 921                                 | 379                                                    | 488         | 10.38686635 | 6.615778484    |       |  |
| 10.21605281                         | 5.823467091                                            | 2.650919391 | 2.582027075 |                |       |  |
| ENSG00000125944                     | 6607.508785                                            | 6714.458227 | 6756.401469 |                |       |  |
| 4954.001343                         | 3548.898094                                            | 4076.832128 | 6692.789494 |                |       |  |
| 4193.243855                         | 0.674441944                                            | 2.62E-06    | 9.30E-05    | HNRNPR         |       |  |
| 1                                   | 23303771                                               | 23344336    | -           | 8676           |       |  |
| protein_coding                      | heterogeneous nuclear ribonucleoprotein R [Source:HGNC |             |             |                |       |  |
| Symbol;Acc:HGNC:5047]               | -                                                      | 7283        | 7587        | 5812           | 4782  |  |
| 4726                                | 41.10734711                                            | 41.43591958 | 41.67857951 |                | 3109  |  |
| 30.6268317                          | 22.02665446                                            | 25.32825046 |             |                |       |  |
| ENSG00000161011                     | 7110.12582                                             | 8056.995874 | 8803.549265 |                |       |  |
| 11209.17911                         | 13138.57094                                            | 12318.48557 | 7990.223653 |                |       |  |
| 12222.07854                         | -0.613287062                                           | 2.63E-06    | 9.33E-05    | SQSTM1         |       |  |
| 5                                   | 179806398                                              | 179838078   | +           | 7654           |       |  |
| protein_coding                      | sequestosome 1 [Source:HGNC Symbol;Acc:HGNC:11280]     |             |             |                |       |  |
| -                                   | 7837                                                   | 9104        | 7573        | 10820          | 11510 |  |
|                                     |                                                        |             | 14280       |                |       |  |



|                        |                                                       |             |                |                        |             |
|------------------------|-------------------------------------------------------|-------------|----------------|------------------------|-------------|
| 50.14066302            | 56.35990235                                           | 61.55826141 | 78.55084233    |                        |             |
| 92.43452758            | 86.75025652                                           |             |                |                        |             |
| ENSG00000108107        | 18769.20798                                           | 21485.91233 | 23772.95424    |                        |             |
| 28318.19881            | 36261.77091                                           | 37893.14534 | 21342.69152    |                        |             |
| 34157.70502            | -0.678523984                                          | 2.66E-06    | 9.40E-05       |                        | RPL28       |
| 19                     | 55385345                                              | 55403250    | +              | 6933                   |             |
| protein_coding         | ribosomal protein L28 [Source:HGNC                    |             |                |                        |             |
| Symbol;Acc:HGNC:10330] | -                                                     | 20688       | 24278          | 20450                  | 27335       |
| 43927                  | 146.1254935                                           | 165.9274151 | 183.518123     |                        | 31767       |
| 219.0836267            | 281.6452058                                           | 294.605847  |                |                        |             |
| ENSG00000125740        | 56.24955989                                           | 49.55972857 | 30.2247829     |                        |             |
| 310.7905485            | 215.7419555                                           | 91.4397388  | 45.34469045    |                        |             |
| 205.9907476            | -2.17639692                                           | 2.70E-06    | 9.54E-05       |                        | FOSB        |
| 19                     | 45467995                                              | 45475179    | +              | 5553                   |             |
| protein_coding         | "FosB proto-oncogene, AP-1 transcription factor       |             |                |                        |             |
| subunit [Source:HGNC   | Symbol;Acc:HGNC:3797]"                                | TF_bZIP     | 62             |                        | 56          |
| 26                     | 300                                                   | 189         | 106            | 0.54675492             | 0.477844723 |
| 0.291308073            | 3.001965003                                           | 2.09209543  | 0.887583479    |                        |             |
| ENSG00000106991        | 2165.608056                                           | 1984.159133 | 2349.395624    |                        |             |
| 1304.284335            | 1327.554996                                           | 1435.431371 | 2166.387605    |                        |             |
| 1355.756901            | 0.675550107                                           | 2.73E-06    | 9.60E-05       |                        | ENG         |
| 9                      | 127815012                                             | 127854756   | -              | 3935                   |             |
| protein_coding         | endoglin [Source:HGNC                                 |             |                |                        |             |
| Symbol;Acc:HGNC:3349]  | -                                                     |             |                |                        |             |
| 2387                   | 2242                                                  | 2021        | 1259           | 1163                   | 1664        |
| 26.99711226            | 31.9542349                                            | 17.77841489 | 18.16696327    |                        |             |
| 19.66253929            |                                                       |             |                |                        |             |
| ENSG00000102054        | 2786.167717                                           | 2582.415857 | 2931.803941    |                        |             |
| 1915.505747            | 1708.813267                                           | 1416.453312 | 2766.795838    |                        |             |
| 1680.257442            | 0.719848666                                           | 2.79E-06    | 9.82E-05       |                        | RBBP7       |
| X                      | 16839283                                              | 16870414    | -              | 7392                   |             |
| protein_coding         | "RB binding protein 7, chromatin remodeling factor    |             |                |                        |             |
| [Source:HGNC           | Symbol;Acc:HGNC:9890]"                                | -           | 3071           | 2918                   | 2522        |
| 1849                   | 1497                                                  | 1642        | 20.34447756    | 18.70465793            |             |
| 21.22706602            | 13.89911015                                           | 12.44821849 | 10.32861793    |                        |             |
| ENSG00000105880        | 30.84653284                                           | 24.77986429 | 30.2247829     |                        | 0           |
| 0                      | 0                                                     | 28.61706001 | 0              | 7.271518142            |             |
| 2.87E-06               | 0.000100621                                           | DLX5        | 7              | 97020392               |             |
| 97024950               | -                                                     | 1748        | protein_coding | distal-less homeobox 5 |             |
| [Source:HGNC           | Symbol;Acc:HGNC:2918]                                 | Homeobox    |                | 34                     | 28          |
| 26                     | 0                                                     | 0           | 0.952502605    | 0.759002216            |             |
| 0.925419755            | 0                                                     | 0           | 0              |                        |             |
| ENSG00000163376        | 246.7722627                                           | 229.2137447 | 144.1489646    |                        |             |
| 504.516657             | 418.9275009                                           | 533.11093   | 206.7116573    |                        |             |
| 485.5183626            | -1.2289648                                            | 2.89E-06    | 0.000101302    |                        | KBTBD8      |
| 3                      | 66998307                                              | 67011210    | +              | 4736                   |             |
| protein_coding         | kelch repeat and BTB domain containing 8 [Source:HGNC |             |                |                        |             |
| Symbol;Acc:HGNC:30691] | -                                                     | 272         | 259            | 124                    | 487         |
| 618                    | 2.812457017                                           | 2.591281003 | 1.628984073    |                        | 367         |
| 5.713856263            | 4.763231954                                           | 6.067472261 |                |                        |             |
| ENSG00000184867        | 623.2814136                                           | 585.8667914 | 548.6960587    |                        |             |

|                                     |                   |                |                      |              |
|-------------------------------------|-------------------|----------------|----------------------|--------------|
| 949.9831098                         | 985.1074477       | 1182.678131    | 585.9480879          |              |
| 1039.25623                          | -0.826744918      | 2.95E-06       | 0.00010325           | ARMCX2       |
| X                                   | 101655281         | 101659891      | - 3589               |              |
| protein_coding                      | armadillo repeat  | containing     | X-linked 2           | [Source:HGNC |
| Symbol;Acc:HGNC:16869]              | -                 | 687 662        | 472 917              | 863          |
| 1371                                | 9.373719689       | 8.739990729    | 8.182299779          |              |
| 14.19737066                         | 14.78034929       | 17.76212878    |                      |              |
| ENSG00000166845                     | 788.4010894       | 574.3618544    | 730.0447561          |              |
| 417.4953034                         | 291.0804162       | 269.1433821    | 697.6025666          |              |
| 325.9063673                         | 1.098370139       | 2.97E-06       | 0.000103773          |              |
| C18orf54                            | 18                | 54357917       | 54385218             | + 6165       |
| protein_coding                      | chromosome 18     | open reading   | frame 54             |              |
| [Source:HGNC Symbol;Acc:HGNC:13796] | -                 | 869            | 649                  | 628          |
| 403                                 | 255 312           | 6.902642468    | 4.988133368          |              |
| 6.337725272                         | 3.632319221       | 2.542461936    | 2.353165818          |              |
| ENSG00000005884                     | 10139.4368        | 9988.055298    | 14895.00551          |              |
| 7910.655427                         | 6339.845614       | 5557.12073     | 11674.16587          |              |
| 6602.54059                          | 0.822165867       | 3.01E-06       | 0.000104861          | ITGA3        |
| 17                                  | 50055968          | 50090481       | + 9802               |              |
| protein_coding                      | integrin subunit  | alpha 3        | [Source:HGNC         |              |
| Symbol;Acc:HGNC:6139]               | -                 | 11176 11286    | 12813 7636           | 5554         |
| 6442                                | 55.83421036       | 54.55716424    | 81.32853974          |              |
| 43.28757581                         | 34.82880209       | 30.55885237    |                      |              |
| ENSG00000240694                     | 23.58852512       | 28.3198449     | 33.71225785          | 0            |
| 0                                   | 0                 | 28.54020929    | 0                    | 7.267000502  |
| 3.02E-06                            | 0.000105014       | PNMA2 8        | 26504686             |              |
| 26514092                            | - 5579            | protein_coding | PNMA family member 2 |              |
| [Source:HGNC Symbol;Acc:HGNC:9159]  | -                 | 26             | 32                   | 29           |
| 0                                   | 0 0               | 0.22821578     | 0.271781604          |              |
| 0.323406305                         | 0 0               | 0              |                      |              |
| ENSG00000179300                     | 235.8852512       | 230.0987398    | 213.8984636          |              |
| 91.16522755                         | 29.67878753       | 15.52750281    | 226.6274848          |              |
| 45.45717263                         | 2.322450486       | 3.07E-06       | 0.000106487          | RTL3         |
| X                                   | 78656069          | 78659328       | - 2648               |              |
| protein_coding                      | retrotransposon   | Gag like 3     | [Source:HGNC         |              |
| Symbol;Acc:HGNC:22997]              | -                 | 260 260        | 184 88               | 26           |
| 18                                  | 4.808216902       | 4.652451002    | 4.323213553          |              |
| 1.846616599                         | 0.603535371       | 0.316071649    |                      |              |
| ENSG00000179115                     | 5573.242684       | 6981.726763    | 6112.381095          |              |
| 8194.510795                         | 10750.57004       | 12515.16727    | 6222.450181          |              |
| 10486.74937                         | -0.753058879      | 3.08E-06       | 0.000106487          | FARSA        |
| 19                                  | 12922479          | 12934037       | - 2435               |              |
| protein_coding                      | phenylalanyl-tRNA | synthetase     | subunit alpha        |              |
| [Source:HGNC Symbol;Acc:HGNC:3592]  | -                 | 6143           | 7889                 | 5258         |
| 7910                                | 9418 14508        | 123.5407499    | 153.5145102          |              |
| 134.3471515                         | 180.5051352       | 237.7426399    | 277.0381634          |              |
| ENSG00000198938                     | 36929.65057       | 43347.94759    | 32729.9524           |              |
| 48624.21728                         | 69505.43742       | 72740.31221    | 37669.18352          |              |
| 63623.3223                          | -0.756152343      | 3.11E-06       | 0.000107333          | MT-C03       |
| MT                                  | 9207 9990         | + 784          | protein_coding       |              |

|                                                                                            |              |             |             |             |       |             |
|--------------------------------------------------------------------------------------------|--------------|-------------|-------------|-------------|-------|-------------|
| mitochondrially encoded cytochrome c oxidase III [Source:HGNC Symbol;Acc:HGNC:7422]        | -            | 40705       | 48981       | 28155       | 46936 | 60890       |
| 84323                                                                                      | 2542.496595  | 2960.315681 |             | 2234.324849 |       |             |
| 3326.611283                                                                                | 4773.943465  | 5001.04779  |             |             |       |             |
| ENSG00000078053                                                                            | 465.4197455  | 351.3430758 |             | 499.8714095 |       |             |
| 218.5893524                                                                                | 196.3365944  | 149.2365548 |             | 438.8780769 |       |             |
| 188.0541672                                                                                | 1.223806456  | 3.13E-06    |             | 0.000107828 |       | AMPH        |
| 7                                                                                          | 38383704     | 38631567    |             | -           | 5636  |             |
| protein_coding amphiphysin [Source:HGNC Symbol;Acc:HGNC:471]                               | -            |             |             |             |       |             |
| 513                                                                                        | 397          | 430         | 211         | 172         | 173   | 4.457332831 |
| 3.337689736                                                                                | 4.746836988  | 2.080288242 |             |             |       | 1.875879005 |
| 1.427269998                                                                                |              |             |             |             |       |             |
| ENSG00000240342                                                                            | 5478.888584  | 5899.377691 |             | 6435.553774 |       |             |
| 8202.798543                                                                                | 9125.085674  | 9451.07338  |             | 5937.940016 |       |             |
| 8926.319199                                                                                | -0.588291024 | 3.20E-06    |             | 0.000110011 |       | RPS2P5      |
| 12                                                                                         | 118246084    | 118246962   |             | +           | 879   |             |
| processed_pseudogene ribosomal protein S2 pseudogene 5 [Source:HGNC Symbol;Acc:HGNC:31386] | -            | 6039        | 6666        | 5536        | 7918  | 7994        |
| 10956                                                                                      | 336.4378416  | 359.3377756 |             | 391.8447686 |       |             |
| 500.5398579                                                                                | 559.0139286  | 579.5543457 |             |             |       |             |
| ENSG00000083223                                                                            | 838.2998926  | 996.5045424 |             | 695.1700066 |       |             |
| 1282.528997                                                                                | 1618.635412  | 1729.591286 |             | 843.3248139 |       |             |
| 1543.585232                                                                                | -0.87123528  | 3.27E-06    |             | 0.000112325 |       | TUT7        |
| 9                                                                                          | 86287733     | 86354454    |             | -           | 6707  |             |
| protein_coding terminal uridylyl transferase 7 [Source:HGNC Symbol;Acc:HGNC:25817]         | -            | 924         | 1126        | 598         | 1238  | 1418        |
| 2005                                                                                       | 6.746404056  | 7.954932978 |             | 5.54727536  |       |             |
| 10.25662275                                                                                | 12.99556856  | 13.90007325 |             |             |       |             |
| ENSG00000165805                                                                            | 4.53625483   | 4.424975766 |             | 17.43737475 |       |             |
| 40.4027713                                                                                 | 97.02680539  | 115.5936321 |             | 8.799535115 |       |             |
| 84.34106959                                                                                | -3.296618021 | 3.29E-06    |             | 0.000112651 |       |             |
| C12orf50                                                                                   | 12           | 87980035    | 88034037    | -           |       | 5609        |
| protein_coding chromosome 12 open reading frame 50 [Source:HGNC Symbol;Acc:HGNC:26665]     | -            |             |             | 5           | 5     | 15          |
| 39                                                                                         | 85           | 134         | 0.043652915 | 0.042238745 |       |             |
| 0.166384423                                                                                | 0.386359158  | 0.931495682 |             | 1.110837101 |       |             |
| ENSG00000155090                                                                            | 1989.601368  | 1940.794371 |             | 2187.809285 |       |             |
| 2805.402684                                                                                | 3443.880846  | 3453.144098 |             | 2039.401675 |       |             |
| 3234.142543                                                                                | -0.665597642 | 3.44E-06    |             | 0.000117585 |       | KLF10       |
| 8                                                                                          | 102648779    | 102655902   |             | -           | 4003  |             |
| protein_coding Kruppel like factor 10 [Source:HGNC Symbol;Acc:HGNC:11810]                  | zf-C2H2      | 2193        | 2193        | 1882        | 2708  | 3017        |
| 4003                                                                                       | 26.82759399  | 25.95849337 |             | 29.25101063 |       |             |
| 37.5902413                                                                                 | 46.32730965  | 46.4976515  |             |             |       |             |
| ENSG00000176393                                                                            | 1332.751669  | 1269.08305  |             | 1598.426019 |       |             |
| 859.8538508                                                                                | 837.8550019  | 776.3751407 |             | 1400.086912 |       |             |
| 824.6946645                                                                                | 0.763254443  | 3.47E-06    |             | 0.00011861  |       | RNPEP       |
| 1                                                                                          | 201982372    | 202006147   |             | +           | 3479  |             |
| protein_coding arginyl aminopeptidase [Source:HGNC Symbol;Acc:HGNC:10078]                  | -            | 1469        | 1434        | 1375        | 830   | 734         |

|                                     |                                                |                                     |                |                  |                |
|-------------------------------------|------------------------------------------------|-------------------------------------|----------------|------------------|----------------|
| 900                                 | 20.67740578                                    | 19.53085085                         | 24.58980677    |                  |                |
| 13.25670852                         | 12.96847745                                    | 12.02871122                         |                |                  |                |
| ENSG00000144893                     | 39.01179154                                    | 30.97483036                         | 16.2748831     | 0                |                |
| 0                                   | 0                                              | 28.753835                           | 0              | 7.281136132      |                |
| 3.52E-06                            | 0.000119801                                    | MED12L                              | 3              | 151085697        |                |
| 151437072                           | +                                              | 12619                               | protein_coding | mediator complex |                |
| subunit 12 like                     | [Source:HGNC Symbol;Acc:HGNC:16050]            | -                                   |                |                  | 43             |
| 35                                  | 14                                             | 0                                   | 0              | 0.166867669      |                |
| 0.131422446                         | 0.069025561                                    | 0                                   | 0              | 0                |                |
| ENSG00000183963                     | 970.7585336                                    | 1056.684213                         | 900.9310287    |                  |                |
| 1404.773279                         | 1700.822824                                    | 2106.564549                         | 976.1245917    |                  |                |
| 1737.386884                         | -0.831802648                                   | 3.53E-06                            | 0.000119801    |                  | SMTN           |
| 22                                  | 31064105                                       | 31104757                            | +              | 10242            |                |
| protein_coding                      | smoothelin                                     | [Source:HGNC Symbol;Acc:HGNC:11126] | -              |                  |                |
| 1070                                | 1194                                           | 775                                 | 1356           | 1490             | 2442           |
| 5.523902394                         | 4.707862581                                    | 7.356766326                         | 8.942292205    |                  |                |
| 11.08643477                         |                                                |                                     |                |                  |                |
| ENSG00000131171                     | 1655.733013                                    | 1503.606765                         | 2100.622411    |                  |                |
| 1090.874825                         | 953.1456765                                    | 995.4854582                         | 1753.32073     |                  |                |
| 1013.168653                         | 0.7904343                                      | 3.53E-06                            | 0.000119801    |                  |                |
| SH3BGR1 X                           | 81201943                                       | 81298547                            | +              | 2304             |                |
| protein_coding                      | SH3 domain binding glutamate rich protein like |                                     |                |                  |                |
| [Source:HGNC Symbol;Acc:HGNC:10823] | -                                              | 1825                                | 1699           |                  | 1807           |
| 1053                                | 835                                            | 1154                                | 38.78904414    | 34.9411621       |                |
| 48.79580919                         | 25.39556855                                    | 22.27672589                         | 23.28918829    |                  |                |
| ENSG00000179598                     | 185.0791971                                    | 147.7941906                         | 90.67434869    |                  |                |
| 257.9561552                         | 504.5393881                                    | 471.8635578                         | 141.1825788    |                  |                |
| 411.4530337                         | -1.539389018                                   | 3.54E-06                            | 0.000119907    |                  | PLD6           |
| 17                                  | 17200995                                       | 17206315                            | -              | 2560             |                |
| protein_coding                      | phospholipase D family member 6                | [Source:HGNC                        |                |                  |                |
| Symbol;Acc:HGNC:30447]              | -                                              | 204                                 | 167            | 78               | 249            |
| 547                                 | 3.902284112                                    | 3.091028054                         | 1.89566453     |                  | 442            |
| 5.404697921                         | 10.61279228                                    | 9.935240379                         |                |                  |                |
| ENSG00000255248                     | 851.0014061                                    | 817.7355215                         | 978.8179692    |                  |                |
| 1519.765782                         | 1424.581802                                    | 1425.942342                         | 882.5182989    |                  |                |
| 1456.763308                         | -0.723941715                                   | 3.56E-06                            | 0.000120407    |                  |                |
| MIR100HG                            | 11                                             | 122028327                           | 122556721      | -                | 19385          |
| processed_transcript                |                                                | mir-100-let-7a-2-mir-125b-1 cluster |                |                  |                |
| host gene                           | [Source:HGNC Symbol;Acc:HGNC:39522]            | -                                   | 938            | 924              |                |
| 842                                 | 1467                                           | 1248                                | 1653           | 2.369549124      | 2.258565067    |
| 2.702421782                         | 4.205100233                                    | 3.957274169                         | 3.964953208    |                  |                |
| ENSG00000101224                     | 1886.174758                                    | 1792.115185                         | 2019.247996    |                  |                |
| 1340.543232                         | 1013.644743                                    | 937.6886422                         | 1899.179313    |                  |                |
| 1097.292206                         | 0.791575171                                    | 3.68E-06                            | 0.000124365    |                  | CDC25B         |
| 20                                  | 3786772                                        | 3806121                             | +              | 4314             | protein_coding |
| division cycle 25B                  | [Source:HGNC Symbol;Acc:HGNC:1726]             | -                                   |                |                  | cell           |
| 2025                                | 1737                                           | 1294                                | 888            | 1087             | 23.59951252    |
| 22.24187151                         | 25.05108406                                    | 16.66733557                         | 12.65261185    |                  |                |
| 11.71602855                         |                                                |                                     |                |                  |                |
| ENSG00000136167                     | 3140.902844                                    | 3018.718467                         | 2093.647461    |                  |                |

|                                                                |                                                    |              |                 |       |
|----------------------------------------------------------------|----------------------------------------------------|--------------|-----------------|-------|
| 5180.878443                                                    | 4295.433749                                        | 4602.179307  | 2751.089591     |       |
| 4692.8305                                                      | -0.769933821                                       | 3.70E-06     | 0.000124629     | LCP1  |
| 13                                                             | 46125920                                           | 46211871     | - 5061          |       |
| protein_coding                                                 | lymphocyte cytosolic protein 1 [Source:HGNC        |              |                 |       |
| Symbol;Acc:HGNC:6528]                                          | -                                                  | 3462 3411    | 1801 5001       | 3763  |
| 5335                                                           | 33.498041                                          | 31.93536049  | 22.14033675     |       |
| 54.9076126                                                     | 45.70305605                                        | 49.01501102  |                 |       |
| ENSG00000196422                                                | 605.1363943                                        | 592.0617574  | 874.1937207     |       |
| 394.7039966                                                    | 297.9293672                                        | 268.2807431  | 690.4639575     |       |
| 320.3047023                                                    | 1.107651923                                        | 3.75E-06     | 0.000126239     |       |
| PPP1R26 9                                                      | 135479079                                          | 135488893    | + 5276          |       |
| protein_coding                                                 | protein phosphatase 1 regulatory subunit 26        |              |                 |       |
| [Source:HGNC Symbol;Acc:HGNC:29089]                            | -                                                  | 667          | 669             | 752   |
| 381                                                            | 261 311                                            | 6.190842147  | 6.008246909     |       |
| 8.867881893                                                    | 4.012658796                                        | 3.040766561  | 2.740858532     |       |
| ENSG00000164535                                                | 717.6355141                                        | 931.0149011  | 710.2823981     |       |
| 1121.95388                                                     | 1724.794152                                        | 1626.0746    | 786.3109378     |       |
| 1490.940878                                                    | -0.922437954                                       | 3.80E-06     | 0.00012746      | DAGLB |
| 7                                                              | 6409126 6484190                                    | - 5756       | protein_coding  |       |
| diacylglycerol lipase beta [Source:HGNC Symbol;Acc:HGNC:28923] | -                                                  |              |                 |       |
| 791                                                            | 1052 611                                           | 1083 1511    | 1885 6.72952455 |       |
| 8.660069859                                                    | 6.60430728                                         | 10.45489595  | 16.13581995     |       |
| 15.22725384                                                    |                                                    |              |                 |       |
| ENSG00000210082                                                | 103109.0723                                        | 112828.9171  | 69184.52805     |       |
| 200352.163                                                     | 270071.2591                                        | 393152.0581  | 95040.83913     |       |
| 287858.4934                                                    | -1.59873815                                        | 3.97E-06     | 0.000132822     | MT-   |
| RNR2 MT                                                        | 1671 3229                                          | + 1559       | Mt_rRNA         |       |
| mitochondrially                                                | encoded 16S RNA [Source:HGNC Symbol;Acc:HGNC:7471] |              |                 |       |
| -                                                              | 113650 127491                                      | 59514 193396 | 236595 455755   |       |
| 3569.866772                                                    | 3874.894238                                        | 2375.088911  | 6893.081538     |       |
| 9328.39242                                                     | 13593.03217                                        |              |                 |       |
| ENSG00000180340                                                | 1046.967615                                        | 1156.688665  | 1297.340681     |       |
| 753.1490958                                                    | 630.1034892                                        | 605.5726098  | 1166.998987     |       |
| 662.9417316                                                    | 0.815633499                                        | 3.97E-06     | 0.000132822     | FZD2  |
| 17                                                             | 44557459                                           | 44559570     | + 2112          |       |
| protein_coding                                                 | frizzled class receptor 2 [Source:HGNC             |              |                 |       |
| Symbol;Acc:HGNC:4040]                                          | -                                                  | 1154 1307    | 1116 727        | 552   |
| 702                                                            | 26.75719468                                        | 29.3229807   | 32.87586038     |       |
| 19.12725028                                                    | 16.06543628                                        | 15.4551853   |                 |       |
| ENSG00000115216                                                | 2441.412349                                        | 2664.720406  | 2657.455912     |       |
| 3279.876255                                                    | 5285.107164                                        | 4878.223801  | 2587.862889     |       |
| 4481.069073                                                    | -0.792117902                                       | 4.10E-06     | 0.000136734     | NRBP1 |
| 2                                                              | 27427790                                           | 27442259     | + 5329          |       |
| protein_coding                                                 | nuclear receptor binding protein 1 [Source:HGNC    |              |                 |       |
| Symbol;Acc:HGNC:7993]                                          | -                                                  | 2691 3011    | 2286 3166       | 4630  |
| 5655                                                           | 24.72843666                                        | 26.77265713  | 26.68931039     |       |
| 33.01241028                                                    | 53.4050875                                         | 49.34213159  |                 |       |
| ENSG00000111716                                                | 476.3067571                                        | 753.1308753  | 731.2072478     |       |
| 231.0209744                                                    | 305.91981                                          | 347.6435352  | 653.5482934     |       |
| 294.8614399                                                    | 1.146828731                                        | 4.18E-06     | 0.000139231     | LDHB  |

|                       |                                                       |             |             |             |        |
|-----------------------|-------------------------------------------------------|-------------|-------------|-------------|--------|
| 12                    | 21635342                                              | 21757857    | -           | 2983        |        |
| protein_coding        | lactate dehydrogenase B [Source:HGNC                  |             |             |             |        |
| Symbol;Acc:HGNC:6541] | -                                                     | 525         | 851         | 629         | 223    |
| 403                   | 8.61856048                                            | 13.51769825 | 13.11910593 |             | 268    |
| 4.153972847           | 5.522413231                                           | 6.281781279 |             |             |        |
| ENSG00000102595       | 547.9795835                                           | 423.0276832 | 518.4712759 |             |        |
| 256.9201867           | 235.1473166                                           | 144.0607206 | 496.4928475 |             |        |
| 212.0427413           | 1.230034944                                           | 4.29E-06    | 0.000142799 |             | UGGT2  |
| 13                    | 95801580                                              | 96053482    | -           | 8105        |        |
| protein_coding        | UDP-glucose glycoprotein glucosyltransferase 2        |             |             |             |        |
| [Source:HGNC          | Symbol;Acc:HGNC:15664]                                | -           | 604         | 478         | 446    |
| 248                   | 206                                                   | 167         | 3.64932551  | 2.794482011 |        |
| 3.423644685           | 1.700241864                                           | 1.562289671 | 0.958063887 |             |        |
| ENSG00000142156       | 26517.13123                                           | 30917.30567 | 51178.69489 |             |        |
| 12966.18168           | 13119.16558                                           | 8346.032763 | 36204.37726 |             |        |
| 11477.12668           | 1.657413861                                           | 4.40E-06    | 0.000145959 |             | COL6A1 |
| 21                    | 45981737                                              | 46005050    | +           | 5343        |        |
| protein_coding        | collagen type VI alpha 1 chain [Source:HGNC           |             |             |             |        |
| Symbol;Acc:HGNC:2211] | -                                                     | 29228       | 34935       | 44025       | 12516  |
| 9675                  | 267.8814296                                           | 309.8146957 | 512.6500889 |             | 11493  |
| 130.1644609           | 132.219525                                            | 84.19703879 |             |             |        |
| ENSG00000158301       | 438.2022166                                           | 487.6323294 | 417.3345023 |             |        |
| 746.9332848           | 858.4018548                                           | 810.0180635 | 447.7230161 |             |        |
| 805.1177344           | -0.845621371                                          | 4.43E-06    | 0.000146597 |             |        |
| GPRASP2 X             | 102712176                                             | 102717733   | +           | 3975        |        |
| protein_coding        | G protein-coupled receptor associated sorting protein |             |             |             |        |
| 2 [Source:HGNC        | Symbol;Acc:HGNC:25169]                                | -           | 483         | 551         | 359    |
| 721                   | 752                                                   | 939         | 5.950297519 | 6.568117397 |        |
| 5.619066375           | 10.07883129                                           | 11.62861703 | 10.98397352 |             |        |
| ENSG00000141456       | 2136.576025                                           | 2367.362035 | 2087.835003 |             |        |
| 3031.243816           | 3494.106486                                           | 4160.508115 | 2197.257688 |             |        |
| 3561.952806           | -0.697030205                                          | 4.47E-06    | 0.000147885 |             | PELP1  |
| 17                    | 4669774                                               | 4704337     | -           | 6577        |        |
| protein_coding        | "proline, glutamate and leucine rich protein 1        |             |             |             |        |
| [Source:HGNC          | Symbol;Acc:HGNC:30134]"                               | -           | 2355        | 2675        | 1796   |
| 2926                  | 3061                                                  | 4823        | 17.53443406 | 19.27180468 |        |
| 16.9896854            | 24.72057246                                           | 28.60769375 | 34.09733514 |             |        |
| ENSG00000102317       | 3490.194466                                           | 4032.922913 | 4218.682197 |             |        |
| 2748.424417           | 2465.622349                                           | 2311.010002 | 3913.933192 |             |        |
| 2508.352256           | 0.64187206                                            | 4.48E-06    | 0.000147932 |             | RBM3   |
| X                     | 48574449                                              | 48579066    | +           | 3731        |        |
| protein_coding        | RNA binding motif protein 3 [Source:HGNC              |             |             |             |        |
| Symbol;Acc:HGNC:9900] | -                                                     | 3847        | 4557        | 3629        | 2653   |
| 2679                  | 50.49235428                                           | 57.87356296 | 60.5157703  |             | 2160   |
| 39.51154796           | 35.58572861                                           | 33.38708345 |             |             |        |
| ENSG00000176171       | 2025.891407                                           | 2485.06639  | 2669.080828 |             |        |
| 3767.817416           | 3810.299722                                           | 3723.150119 | 2393.346208 |             |        |
| 3767.089086           | -0.654780694                                          | 4.49E-06    | 0.000147932 |             | BNIP3  |
| 10                    | 131966455                                             | 131982013   | -           | 5325        |        |
| protein_coding        | BCL2 interacting protein 3 [Source:HGNC               |             |             |             |        |

|                        |                                     |              |             |             |       |             |
|------------------------|-------------------------------------|--------------|-------------|-------------|-------|-------------|
| Symbol;Acc:HGNC:1084]  | -                                   | 2233         | 2808        | 2296        | 3637  | 3338        |
| 4316                   | 20.53514598                         | 24.98641404  |             | 26.82619754 |       |             |
| 37.95209309            | 38.53133714                         | 37.68711059  |             |             |       |             |
| ENSG00000136891        | 1445.250789                         | 1393.867366  |             | 1205.503841 |       |             |
| 2035.678092            | 2082.081095                         | 2439.54322   |             | 1348.207332 |       |             |
| 2185.767469            | -0.696845617                        | 4.57E-06     |             | 0.000150049 |       | TEX10       |
| 9                      | 100302077                           | 100352939    |             | -           | 7261  |             |
| protein_coding         | testis expressed 10                 | [Source:HGNC |             |             |       |             |
| Symbol;Acc:HGNC:25988] | -                                   | 1593         | 1575        | 1037        | 1965  | 1824        |
| 2828                   | 10.74355528                         | 10.27804612  |             | 8.885649255 |       |             |
| 15.0375873             | 15.44101189                         | 18.10981386  |             |             |       |             |
| ENSG00000165996        | 430.9442088                         | 388.5128722  |             | 425.4719439 |       |             |
| 219.6253209            | 190.6291353                         | 140.6101644  |             | 414.9763416 |       |             |
| 183.6215402            | 1.178503265                         | 4.57E-06     |             | 0.000150049 |       | HACD1       |
| 10                     | 17589032                            | 17617377     |             | -           | 3857  |             |
| protein_coding         | 3-hydroxyacyl-CoA dehydratase 1     | [Source:HGNC |             |             |       |             |
| Symbol;Acc:HGNC:9639]  | -                                   | 475          | 439         | 366         | 212   | 167         |
| 163                    | 6.030768452                         | 5.39313538   |             | 5.903890488 |       |             |
| 3.054205576            | 2.661424757                         | 1.965029089  |             |             |       |             |
| ENSG00000164692        | 15423.26642                         | 12104.07871  |             | 26574.55912 |       |             |
| 5643.95636             | 5142.420686                         | 3047.703747  |             | 18033.96808 |       |             |
| 4611.360264            | 1.967480822                         | 4.60E-06     |             | 0.000150754 |       | COL1A2      |
| 7                      | 94394561                            | 94431232     |             | +           | 11156 |             |
| protein_coding         | collagen type I alpha 2 chain       | [Source:HGNC |             |             |       |             |
| Symbol;Acc:HGNC:2198]  | -                                   | 17000        | 13677       | 22860       | 5448  | 4505        |
| 3533                   | 74.62238053                         | 58.09099057  |             | 127.4895438 |       |             |
| 27.13567549            | 24.8218216                          | 14.72536776  |             |             |       |             |
| ENSG00000164294        | 1312.792148                         | 1368.202507  |             | 1394.98998  |       |             |
| 928.2277714            | 752.2431148                         | 654.7430354  |             | 1358.661545 |       |             |
| 778.4046405            | 0.804151856                         | 4.64E-06     |             | 0.000151782 |       | GPX8        |
| 5                      | 55160118                            | 55167071     |             | +           | 3868  |             |
| protein_coding         | glutathione peroxidase 8 (putative) | [Source:HGNC |             |             |       |             |
| Symbol;Acc:HGNC:33100] | -                                   | 1447         | 1546        | 1200        | 896   | 659         |
| 759                    | 18.31937907                         | 18.93866949  |             | 19.3019696  |       |             |
| 12.8716312             | 10.47240211                         | 9.124022101  |             |             |       |             |
| ENSG00000144741        | 544.3505796                         | 584.0968011  |             | 464.99666   |       |             |
| 930.2997084            | 933.7403154                         | 936.8260032  |             | 531.1480135 |       |             |
| 933.622009             | -0.812414282                        | 4.67E-06     |             | 0.000152379 |       |             |
| SLC25A26               | 3                                   | 66133610     | 66388116    | +           |       | 5850        |
| protein_coding         | solute carrier family 25 member 26  | [Source:HGNC |             |             |       |             |
| Symbol;Acc:HGNC:20661] | -                                   |              |             | 600         | 660   | 400         |
| 898                    | 818                                 | 1086         | 5.022547675 | 5.345822201 |       |             |
| 4.254132103            | 8.529675596                         | 8.594978562  |             | 8.631871714 |       |             |
| ENSG00000197321        | 1222.974302                         | 1238.993214  |             | 1599.58851  |       |             |
| 910.616307             | 609.5566362                         | 542.5999595  |             | 1353.852009 |       |             |
| 687.5909676            | 0.977444274                         | 4.70E-06     |             | 0.00015324  |       | SVIL        |
| 10                     | 29457338                            | 29736781     |             | -           | 9937  |             |
| protein_coding         | supervillin                         | [Source:HGNC |             |             |       |             |
| Symbol;Acc:HGNC:11480] | -                                   |              |             |             |       |             |
| 1348                   | 1400                                | 1376         | 879         | 534         | 629   | 6.642985216 |
| 6.675736508            |                                     | 8.615291782  |             | 4.915250193 |       | 3.303188268 |

|                                                               |              |             |             |                |
|---------------------------------------------------------------|--------------|-------------|-------------|----------------|
| 2.943244721                                                   |              |             |             |                |
| ENSG00000242802                                               | 1439.807283  | 1711.580626 | 1338.027889 |                |
| 2042.929872                                                   | 2695.062206  | 3464.358406 | 1496.471933 |                |
| 2734.116828                                                   | -0.869464843 | 4.83E-06    | 0.000157187 | AP5Z1          |
| 7                                                             | 4775615      | 4794395     | + 8396      | protein_coding |
| adaptor related protein complex 5 subunit zeta 1 [Source:HGNC |              |             |             |                |
| Symbol;Acc:HGNC:22197]                                        | -            | 1587        | 1934        | 1151 1972      |
| 4016                                                          | 9.256209601  | 10.91466676 | 8.529228322 | 2361           |
| 13.05108218                                                   | 17.28506103  | 22.24089667 |             |                |
| ENSG00000204713                                               | 2005.931886  | 2025.753905 | 1862.311623 |                |
| 2623.072229                                                   | 3658.481309  | 3328.061437 | 1964.665805 |                |
| 3203.204992                                                   | -0.704962159 | 4.87E-06    | 0.000157865 | TRIM27         |
| 6                                                             | 28903002     | 28923989    | - 7986      |                |
| protein_coding tripartite motif containing 27 [Source:HGNC    |              |             |             |                |
| Symbol;Acc:HGNC:9975]                                         | -            | 2211        | 2289        | 1602 2532      |
| 3858                                                          | 13.55776557  | 13.58134957 | 12.48073185 | 3205           |
| 17.61758758                                                   | 24.66869004  | 22.46280234 |             |                |
| ENSG00000127152                                               | 41.73354444  | 90.26950562 | 74.39946559 |                |
| 121.2083139                                                   | 287.6559407  | 411.4788246 | 68.80083855 |                |
| 273.4476931                                                   | -1.9925284   | 4.87E-06    | 0.000157865 | BCL11B         |
| 14                                                            | 99169287     | 99271524    | - 7855      |                |
| protein_coding B cell CLL/lymphoma 11B [Source:HGNC           |              |             |             |                |
| Symbol;Acc:HGNC:13222]                                        | zf-C2H2      | 46          | 102         | 64 117         |
| 477                                                           | 0.286774364  | 0.615290803 | 0.506921407 | 252            |
| 0.827659522                                                   | 1.971976393  | 2.823600225 |             |                |
| ENSG00000104142                                               | 1064.205383  | 1046.064271 | 893.9560788 |                |
| 1362.298571                                                   | 1878.895549  | 2610.345751 | 1001.408578 |                |
| 1950.51329                                                    | -0.961887563 | 5.01E-06    | 0.000161889 | VPS18          |
| 15                                                            | 40894430     | 40903975    | + 4049      |                |
| protein_coding "VPS18, CORVET/HOPS core subunit [Source:HGNC  |              |             |             |                |
| Symbol;Acc:HGNC:15972]"                                       | -            | 1173        | 1182        | 769 1315       |
| 3026                                                          | 14.18661944  | 13.83235545 | 11.81640614 | 1646           |
| 18.04637675                                                   | 24.98788015  | 34.74978845 |             |                |
| ENSG00000185085                                               | 1011.584827  | 1370.857492 | 1210.153808 |                |
| 1801.549213                                                   | 1977.063846  | 2633.637005 | 1197.532042 |                |
| 2137.416688                                                   | -0.836246449 | 5.02E-06    | 0.000161889 | INTS5          |
| 11                                                            | 62646848     | 62653302    | - 3285      |                |
| protein_coding integrator complex subunit 5 [Source:HGNC      |              |             |             |                |
| Symbol;Acc:HGNC:29352]                                        | -            | 1115        | 1549        | 1041 1739      |
| 3053                                                          | 16.62142204  | 22.3430514  | 19.71615402 | 1732           |
| 29.41550114                                                   | 32.4085704   | 43.2137991  |             |                |
| ENSG00000077152                                               | 1000.697815  | 1100.048975 | 1153.191717 |                |
| 625.7249709                                                   | 683.7536051  | 610.7484441 | 1084.646169 |                |
| 640.0756734                                                   | 0.761114051  | 5.03E-06    | 0.000162176 | UBE2T          |
| 1                                                             | 202331657    | 202341980   | - 1652      |                |
| protein_coding ubiquitin conjugating enzyme E2 T [Source:HGNC |              |             |             |                |
| Symbol;Acc:HGNC:25009]                                        | -            | 1103        | 1243        | 992 604        |
| 708                                                           | 32.69596449  | 35.65229788 | 37.36013835 | 599            |
| 20.31603439                                                   | 22.28764284  | 19.92756493 |             |                |
| ENSG00000171724                                               | 364.7148883  | 431.8776347 | 291.7854041 |                |



|                                  |                                               |              |             |        |
|----------------------------------|-----------------------------------------------|--------------|-------------|--------|
| 660.9478997                      | 940.5892664                                   | 655.6056744  | 362.7926424 |        |
| 752.3809469                      | -1.049654558                                  | 5.13E-06     | 0.00016492  | VAT1L  |
| 16                               | 77788530                                      | 77980107     | + 4137      |        |
| protein_coding                   | vesicle amine transport 1 like                | [Source:HGNC |             |        |
| Symbol;Acc:HGNC:29315]           | -                                             | 402 488      | 251 638     | 824    |
| 760                              | 4.7584906                                     | 5.589342746  | 3.774809568 |        |
| 8.569336588                      | 12.24303387                                   | 8.541990607  |             |        |
| ENSG0000052749                   | 3990.996999                                   | 4671.889413  | 3921.084335 |        |
| 5410.863449                      | 7376.320194                                   | 8124.334528  | 4194.656916 |        |
| 6970.506057                      | -0.732676954                                  | 5.26E-06     | 0.00016878  | RRP12  |
| 10                               | 97356358                                      | 97426076     | - 8529      |        |
| protein_coding                   | ribosomal RNA processing 12 homolog           | [Source:HGNC |             |        |
| Symbol;Acc:HGNC:29100]           | -                                             | 4399 5279    | 3373 5223   | 6462   |
| 9418                             | 25.25716091                                   | 29.32783393  | 24.60509654 |        |
| 34.02780654                      | 46.5710682                                    | 51.34422345  |             |        |
| ENSG00000171320                  | 1183.962511                                   | 899.1550756  | 886.9811289 |        |
| 636.0846559                      | 301.3538426                                   | 399.401878   | 990.032905  |        |
| 445.6134588                      | 1.151579254                                   | 5.32E-06     | 0.000170498 | ESC02  |
| 8                                | 27771949                                      | 27812640     | + 7973      |        |
| protein_coding                   | establishment of sister chromatid cohesion N- |              |             |        |
| acetyltransferase 2 [Source:HGNC | Symbol;Acc:HGNC:27230]                        | -            |             | 1305   |
| 1016                             | 763 614                                       | 264 463      | 8.015256614 |        |
| 6.038073353                      | 5.954010833                                   | 4.279161236  | 2.03530511  |        |
| 2.700164636                      |                                               |              |             |        |
| ENSG00000100335                  | 1744.643608                                   | 1833.709957  | 1549.601369 |        |
| 2474.928734                      | 2628.85568                                    | 3288.380041  | 1709.318311 |        |
| 2797.388152                      | -0.71061795                                   | 5.40E-06     | 0.000172715 | MIEF1  |
| 22                               | 39499432                                      | 39518132     | + 7555      |        |
| protein_coding                   | mitochondrial elongation factor 1             | [Source:HGNC |             |        |
| Symbol;Acc:HGNC:25979]           | -                                             | 1923 2072    | 1333 2389   | 2303   |
| 3812                             | 12.46446089                                   | 12.99516276  | 10.97747679 |        |
| 17.57088858                      | 18.7372922                                    | 23.46115784  |             |        |
| ENSG00000106799                  | 1755.530619                                   | 1923.094468  | 2150.609552 |        |
| 1343.651138                      | 920.0424135                                   | 1098.139505  | 1943.078213 |        |
| 1120.611019                      | 0.79344982                                    | 5.43E-06     | 0.000173255 | TGFBR1 |
| 9                                | 99104038                                      | 99154192     | + 6844      |        |
| protein_coding                   | transforming growth factor beta receptor 1    | [Source:HGNC |             |        |
| Symbol;Acc:HGNC:11772]           | -                                             | 1935 2173    |             | 1850   |
| 1297                             | 806 1273                                      | 13.84521334  | 15.04444484 |        |
| 16.8177764                       | 10.53033091                                   | 7.238897065  | 8.648671882 |        |
| ENSG00000168528                  | 648.6844407                                   | 472.5874118  | 432.4468938 |        |
| 226.8771004                      | 279.6654979                                   | 173.3904481  | 517.9062487 |        |
| 226.6443488                      | 1.195749483                                   | 5.49E-06     | 0.000174917 |        |
| SERINC2 1                        | 31409565                                      | 31434680     | + 3549      |        |
| protein_coding                   | serine incorporator 2 [Source:HGNC            |              |             |        |
| Symbol;Acc:HGNC:23231]           | -                                             | 715 534      | 372 219     | 245    |
| 201                              | 9.865718647                                   | 7.129543095  | 6.521444268 |        |
| 3.428863204                      | 4.243336228                                   | 2.63342574   |             |        |
| ENSG00000156976                  | 8719.589034                                   | 8302.139531  | 8340.877588 |        |
| 11629.78232                      | 12105.52084                                   | 12328.83724  | 8454.202051 |        |

|                                    |                                                      |                |                    |                     |
|------------------------------------|------------------------------------------------------|----------------|--------------------|---------------------|
| 12021.38013                        | -0.507859569                                         | 5.56E-06       | 0.000176785        | EIF4A2              |
| 3                                  | 186783205                                            | 186789900      | + 6133             |                     |
| protein_coding                     | eukaryotic translation initiation factor 4A2         |                |                    |                     |
| [Source:HGNC Symbol;Acc:HGNC:3284] | -                                                    | 9611           | 9381               | 7175                |
| 11226                              | 10605                                                | 14292          | 76.74044197        | 72.47740112         |
| 72.78732975                        | 101.7101083                                          | 106.2882039    | 108.3555251        |                     |
| ENSG0000040275                     | 1400.795491                                          | 1063.764174    | 1150.866733        |                     |
| 815.3072055                        | 472.5776169                                          | 501.1932853    | 1205.142133        |                     |
| 596.3593692                        | 1.015182721                                          | 5.58E-06       | 0.000177258        | SPDL1               |
| 5                                  | 169583634                                            | 169604778      | + 4777             |                     |
| protein_coding                     | spindle apparatus coiled-coil protein 1 [Source:HGNC |                |                    |                     |
| Symbol;Acc:HGNC:26010]             | -                                                    | 1544           | 1202               | 990 787 414         |
| 581                                | 15.82780672                                          | 11.92272885    | 12.89397429        |                     |
| 9.154434776                        | 5.327119756                                          | 5.655251313    |                    |                     |
| ENSG00000186472                    | 259.4737763                                          | 200.8938998    | 54.63710754        |                     |
| 988.3139441                        | 1195.141944                                          | 1782.212268    | 171.6682612        |                     |
| 1321.889385                        | -2.943368059                                         | 5.67E-06       | 0.000179476        | PCL0                |
| 7                                  | 82754013                                             | 83162930       | - 22873            |                     |
| protein_coding                     | piccolo presynaptic cytomatrix protein [Source:HGNC  |                |                    |                     |
| Symbol;Acc:HGNC:13406]             | -                                                    | 286            | 227                | 47 954 1047         |
| 2066                               | 0.612310331                                          | 0.470250394    | 0.12784436         |                     |
| 2.317593629                        | 2.813655435                                          | 4.199892799    |                    |                     |
| ENSG00000184613                    | 12.70151352                                          | 4.424975766    | 88.34936539        | 0                   |
| 0                                  | 0                                                    | 35.15861823    | 0                  | 7.563420804         |
| 5.67E-06                           | 0.000179476                                          | NELL2          | 12                 | 44508275            |
| 44921848                           | - 6424                                               | protein_coding | neural EGFL like 2 |                     |
| [Source:HGNC Symbol;Acc:HGNC:7751] | -                                                    | 14             | 5                  | 76                  |
| 0                                  | 0                                                    | 0              | 0.10672132         | 0.03688 0.736062863 |
| 0                                  | 0                                                    | 0              |                    |                     |
| ENSG00000239264                    | 569.7536066                                          | 554.0069659    | 503.3588844        |                     |
| 282.8193991                        | 179.214217                                           | 291.5719973    | 542.3731523        |                     |
| 251.2018711                        | 1.10832508                                           | 5.73E-06       | 0.000181001        | TXNDC5              |
| 6                                  | 7881517                                              | 7910814        | - 4387             | protein_coding      |
| thioredoxin domain containing 5    | [Source:HGNC Symbol;Acc:HGNC:21073]                  |                |                    |                     |
| -                                  | 628                                                  | 626            | 433                | 273 157 338         |
| 7.010043176                        | 6.761345671                                          | 6.140830478    | 3.457857217        |                     |
| 2.199780653                        | 3.582449557                                          |                |                    |                     |
| ENSG00000157227                    | 15906.83119                                          | 18162.75553    | 27596.38928        |                     |
| 12497.92392                        | 12444.54391                                          | 9364.809476    | 20555.32533        |                     |
| 11435.7591                         | 0.845943955                                          | 5.75E-06       | 0.000181198        | MMP14               |
| 14                                 | 22836557                                             | 22849027       | + 4464             |                     |
| protein_coding                     | matrix metalloproteinase 14 [Source:HGNC             |                |                    |                     |
| Symbol;Acc:HGNC:7160]              | -                                                    | 17533          | 20523              | 23739 12064 10902   |
| 10856                              | 192.3360667                                          | 217.8427446    | 330.8606214        |                     |
| 150.1686188                        | 150.1168186                                          | 113.077622     |                    |                     |
| ENSG00000231925                    | 2662.781585                                          | 2606.310726    | 3495.612391        |                     |
| 1810.872929                        | 1385.771079                                          | 1900.393817    | 2921.568234        |                     |
| 1699.012608                        | 0.78111376                                           | 5.77E-06       | 0.000181498        | TAPBP               |
| 6                                  | 33299694                                             | 33314387       | - 5056             |                     |
| protein_coding                     | TAP binding protein [Source:HGNC                     |                |                    |                     |

|                            |                                                |             |             |                |             |        |      |
|----------------------------|------------------------------------------------|-------------|-------------|----------------|-------------|--------|------|
| Symbol;Acc:HGNC:11566]     | -                                              | 2935        | 2945        | 3007           | 1748        | 1214   |      |
| 2203                       | 28.42691454                                    | 27.59971991 |             | 37.00268251    |             |        |      |
| 19.21084229                | 14.75906963                                    | 20.25995377 |             |                |             |        |      |
| ENSG00000178896            | 910.8799698                                    | 1436.347134 |             | 1182.254008    |             |        |      |
| 1657.549592                | 2298.964542                                    | 3065.819167 |             | 1176.493704    |             |        |      |
| 2340.777767                | -0.992783582                                   | 5.86E-06    |             | 0.000184046    |             | EXOSC4 |      |
| 8                          | 144078626                                      | 144080647   |             | + 1407         |             |        |      |
| protein_coding             | exosome component 4 [Source:HGNC               |             |             |                |             |        |      |
| Symbol;Acc:HGNC:18189]     | -                                              | 1004        | 1623        | 1017           | 1600        | 2014   |      |
| 3554                       | 34.94365259                                    | 54.65763841 |             | 44.97111983    |             |        |      |
| 63.18848296                | 87.98582873                                    | 117.4503578 |             |                |             |        |      |
| ENSG00000214063            | 949.8917614                                    | 955.7947654 |             | 1329.890447    |             |        |      |
| 617.437223                 | 603.8491771                                    | 549.5010718 |             | 1078.525658    |             |        |      |
| 590.2624906                | 0.869013926                                    | 5.95E-06    |             | 0.000186696    |             | TSPAN4 |      |
| 11                         | 842808                                         | 867116      | + 5841      | protein_coding |             |        |      |
| tetraspanin 4 [Source:HGNC | Symbol;Acc:HGNC:11859]                         |             |             |                |             | -      | 1047 |
| 1080                       | 1144                                           | 596         | 529         | 637            | 8.777850078 |        |      |
| 8.761187807                | 12.18556484                                    | 5.669843834 |             | 5.566930841    |             |        |      |
| 5.07087896                 |                                                |             |             |                |             |        |      |
| ENSG00000167601            | 10785.39948                                    | 9111.910097 |             | 9790.504675    |             |        |      |
| 4200.852247                | 2199.654753                                    | 1696.811002 |             | 9895.938085    |             |        |      |
| 2699.106001                | 1.874418195                                    | 6.18E-06    |             | 0.00019345     |             | AXL    |      |
| 19                         | 41219203                                       | 41261766    |             | + 5154         |             |        |      |
| protein_coding             | AXL receptor tyrosine kinase [Source:HGNC      |             |             |                |             |        |      |
| Symbol;Acc:HGNC:905]       | -                                              | 11888       | 10296       | 8422           | 4055        | 1927   |      |
| 1967                       | 112.9517765                                    | 94.65652582 |             | 101.6664524    |             |        |      |
| 43.71781903                | 22.9818328                                     | 17.74561127 |             |                |             |        |      |
| ENSG00000151348            | 1907.948781                                    | 1906.27956  |             | 2822.529726    |             |        |      |
| 1230.730572                | 1260.206978                                    | 1314.661905 |             | 2212.252689    |             |        |      |
| 1268.533152                | 0.80152878                                     | 6.20E-06    |             | 0.000193861    |             | EXT2   |      |
| 11                         | 44095549                                       | 44245429    |             | + 5286         |             |        |      |
| protein_coding             | exostosin glycosyltransferase 2 [Source:HGNC   |             |             |                |             |        |      |
| Symbol;Acc:HGNC:3513]      | -                                              | 2103        | 2154        | 2428           | 1188        | 1104   |      |
| 1524                       | 19.48232561                                    | 19.30834193 |             | 28.57777221    |             |        |      |
| 12.48824256                | 12.83776066                                    | 13.40567932 |             |                |             |        |      |
| ENSG00000270647            | 2973.968666                                    | 3847.958926 |             | 4031.521042    |             |        |      |
| 2341.288798                | 2313.803936                                    | 2097.075519 |             | 3617.816211    |             |        |      |
| 2250.722751                | 0.684697068                                    | 6.24E-06    |             | 0.000194554    |             | TAF15  |      |
| 17                         | 35713791                                       | 35864615    |             | + 5909         |             |        |      |
| protein_coding             | TATA-box binding protein associated factor 15  |             |             |                |             |        |      |
| [Source:HGNC               | Symbol;Acc:HGNC:11547]                         |             |             |                |             | -      | 3278 |
| 2260                       | 2027                                           | 2431        | 27.16587155 | 34.8659888     | 4348        | 3468   |      |
| 36.51505385                | 21.25232716                                    | 21.08565609 |             | 19.12942813    |             |        |      |
| ENSG00000197299            | 761.1835605                                    | 607.106675  |             | 734.6947227    |             |        |      |
| 363.6249417                | 376.6923033                                    | 395.0886827 |             | 700.9949861    |             |        |      |
| 378.4686426                | 0.888482162                                    | 6.27E-06    |             | 0.000195311    |             | BLM    |      |
| 15                         | 90717327                                       | 90816165    |             | + 6674         |             |        |      |
| protein_coding             | Bloom syndrome RecQ like helicase [Source:HGNC |             |             |                |             |        |      |
| Symbol;Acc:HGNC:1058]      | -                                              | 839         | 686         | 632            | 351         | 330    |      |
| 458                        | 6.156082652                                    | 4.870396899 |             | 5.891660627    |             |        |      |

|                                      |                                                        |             |             |        |      |
|--------------------------------------|--------------------------------------------------------|-------------|-------------|--------|------|
| 2.922354906                          | 3.039310691                                            | 3.190878691 |             |        |      |
| ENSG00000152377                      | 1860.771731                                            | 1415.992245 | 2553.994155 |        |      |
| 1217.262982                          | 918.9009217                                            | 683.2101239 | 1943.586044 |        |      |
| 939.7913423                          | 1.04834614                                             | 6.38E-06    | 0.000198229 | SPOCK1 |      |
| 5                                    | 136975298                                              | 137598379   | - 6222      |        |      |
| protein_coding                       | "SPARC (osteonectin), cwcv and kazal like domains      |             |             |        |      |
| proteoglycan 1                       | [Source:HGNC Symbol;Acc:HGNC:11251]"                   |             |             | -      | 2051 |
| 1600                                 | 2197 1175                                              | 805 792     | 16.14225996 |        |      |
| 12.18474421                          | 21.96882841                                            | 10.4934888  | 7.952674985 |        |      |
| 5.918698166                          |                                                        |             |             |        |      |
| ENSG00000162244                      | 17233.2321                                             | 21877.96518 | 22269.85254 |        |      |
| 29672.20963                          | 32501.69682                                            | 30522.75734 | 20460.34994 |        |      |
| 30898.88793                          | -0.594754223                                           | 6.40E-06    | 0.000198606 | RPL29  |      |
| 3                                    | 51993522                                               | 51995942    | - 2058      |        |      |
| protein_coding                       | ribosomal protein L29 [Source:HGNC                     |             |             |        |      |
| Symbol;Acc:HGNC:10331]               | -                                                      | 18995 24721 | 19157 28642 | 28473  |      |
| 35383                                | 451.9835314                                            | 569.1766891 | 579.1472192 |        |      |
| 773.3391801                          | 850.4234319                                            | 799.4297391 |             |        |      |
| ENSG00000108379                      | 352.0133748                                            | 361.9630176 | 427.7969272 |        |      |
| 210.3016045                          | 124.4226093                                            | 95.75293403 | 380.5911065 |        |      |
| 143.4923826                          | 1.408722051                                            | 6.56E-06    | 0.000203108 | WNT3   |      |
| 17                                   | 46762506                                               | 46833154    | - 4334      |        |      |
| protein_coding                       | Wnt family member 3 [Source:HGNC                       |             |             |        |      |
| Symbol;Acc:HGNC:12782]               | -                                                      | 388 409     | 368 203     | 109    |      |
| 111                                  | 4.384009657                                            | 4.47157832  | 5.28281933  |        |      |
| 2.60267041                           | 1.545912651                                            | 1.190872016 |             |        |      |
| ENSG00000101161                      | 4715.890521                                            | 5386.080502 | 5304.449398 |        |      |
| 6782.485736                          | 8362.569133                                            | 8282.197474 | 5135.473474 |        |      |
| 7809.084114                          | -0.604723143                                           | 6.63E-06    | 0.00020503  | PRPF6  |      |
| 20                                   | 63981135                                               | 64033100    | + 3044      |        |      |
| protein_coding                       | pre-mRNA processing factor 6 [Source:HGNC              |             |             |        |      |
| Symbol;Acc:HGNC:15860]               | -                                                      | 5198 6086   | 4563 6547   | 7326   |      |
| 9601                                 | 83.62195383                                            | 94.73571577 | 93.26370565 |        |      |
| 119.5115108                          | 147.9345539                                            | 146.6570145 |             |        |      |
| ENSG00000106070                      | 664.1077071                                            | 616.8416217 | 873.0312291 |        |      |
| 372.9486582                          | 406.3710908                                            | 316.5885296 | 717.9935193 |        |      |
| 365.3027595                          | 0.975042064                                            | 6.69E-06    | 0.00020608  | GRB10  |      |
| 7                                    | 50590063                                               | 50793462    | - 9795      |        |      |
| protein_coding                       | growth factor receptor bound protein 10 [Source:HGNC   |             |             |        |      |
| Symbol;Acc:HGNC:4564]                | -                                                      | 732 697     | 751 360     | 356    |      |
| 367                                  | 3.65961437                                             | 3.371745438 | 4.770263214 |        |      |
| 2.04225564                           | 2.234050149                                            | 1.742178469 |             |        |      |
| ENSG00000176994                      | 1310.070395                                            | 1228.373273 | 955.5681362 |        |      |
| 1957.980455                          | 1777.302776                                            | 2168.67456  | 1164.670601 |        |      |
| 1967.985931                          | -0.75619286                                            | 6.69E-06    | 0.00020608  | SMCR8  |      |
| 17                                   | 18315310                                               | 18328055    | + 8279      |        |      |
| protein_coding                       | "Smith-Magenis syndrome chromosome region, candidate 8 |             |             |        |      |
| [Source:HGNC Symbol;Acc:HGNC:17921]" | -                                                      |             | 1444 1388   | 822    |      |
| 1890                                 | 1557 2514                                              | 8.541182355 | 7.943977846 |        |      |
| 6.177329703                          | 12.68516046                                            | 11.56000682 | 14.11947045 |        |      |

|                        |                                                       |             |             |             |                |             |
|------------------------|-------------------------------------------------------|-------------|-------------|-------------|----------------|-------------|
| ENSG00000114251        | 2963.988906                                           | 2691.270261 | 5648.546927 |             |                |             |
| 1078.443203            | 994.2393823                                           | 489.9789777 | 3767.935364 |             |                |             |
| 854.2205211            | 2.141301143                                           | 6.77E-06    | 0.000208134 | WNT5A       |                |             |
| 3                      | 55465715                                              | 55490539    | -           | 7397        |                |             |
| protein_coding         | Wnt family member 5A [Source:HGNC                     |             |             |             |                |             |
| Symbol;Acc:HGNC:12784] | -                                                     | 3267        | 3041        | 4859        | 1041           | 871         |
| 568                    | 21.62829076                                           | 19.47992329 | 40.8693873  |             |                |             |
| 7.820007228            | 7.237855302                                           | 3.570456408 |             |             |                |             |
| ENSG00000244586        | 51.71330506                                           | 55.75469465 | 106.9492318 |             |                |             |
| 11.39565344            | 4.565967313                                           | 0           | 71.4724105  | 5.320540252 |                |             |
| 3.771463398            | 6.90E-06                                              | 0.000211972 | WNT5A-AS1   |             |                |             |
| 3                      | 55487699                                              | 55488308    | +           | 500         |                |             |
| antisense              | WNT5A antisense RNA 1 [Source:HGNC                    |             |             |             |                |             |
| Symbol;Acc:HGNC:40616] | -                                                     | 57          | 63          | 92          | 11             | 4           |
| 0                      | 5.582561741                                           | 5.970311431 | 11.44786949 |             |                |             |
| 1.222460188            | 0.49174205                                            | 0           |             |             |                |             |
| ENSG00000076716        | 319.35234                                             | 489.4023197 | 447.5592852 |             |                |             |
| 118.1004084            | 127.8470848                                           | 230.3246251 | 418.771315  |             |                |             |
| 158.7573728            | 1.394913871                                           | 7.00E-06    | 0.000214499 | GPC4        |                |             |
| X                      | 133300103                                             | 133415490   | -           | 4960        |                |             |
| protein_coding         | glypican 4 [Source:HGNC Symbol;Acc:HGNC:4452] -       |             |             |             |                |             |
| 352                    | 553                                                   | 385         | 114         | 112         | 267            | 3.475278956 |
| 5.282869658            | 4.829319067                                           | 1.277130329 | 1.387981592 |             |                |             |
| 2.502998579            |                                                       |             |             |             |                |             |
| ENSG00000138587        | 401.9121779                                           | 254.8786041 | 305.7353039 |             |                |             |
| 160.5751167            | 87.89487077                                           | 104.3793245 | 320.8420286 |             |                |             |
| 117.6164373            | 1.447586356                                           | 7.01E-06    | 0.000214499 | MNS1        |                |             |
| 15                     | 56421544                                              | 56465137    | -           | 2504        |                |             |
| protein_coding         | meiosis specific nuclear structural 1 [Source:HGNC    |             |             |             |                |             |
| Symbol;Acc:HGNC:29636] | -                                                     | 443         | 288         | 263         | 155            | 77          |
| 121                    | 8.663593868                                           | 5.44985069  | 6.534739364 |             |                |             |
| 3.439611698            | 1.890182599                                           | 2.246891307 |             |             |                |             |
| ENSG00000181588        | 1679.321538                                           | 1931.944419 | 2142.472111 |             |                |             |
| 942.7313304            | 1156.331222                                           | 1287.057456 | 1917.912689 |             |                |             |
| 1128.706669            | 0.76406773                                            | 7.46E-06    | 0.000227894 | MEX3D       |                |             |
| 19                     | 1554669                                               | 1568058     | -           | 2850        | protein_coding | mex-3       |
| RNA binding            | family member D [Source:HGNC Symbol;Acc:HGNC:16734] - |             |             |             |                |             |
| 1851                   | 2183                                                  | 1843        | 910         | 1013        | 1492           | 31.80462229 |
| 36.29404025            | 40.23345436                                           | 17.74224516 | 21.848013   |             |                |             |
| 24.34192843            |                                                       |             |             |             |                |             |
| ENSG00000092964        | 2034.963917                                           | 1780.610248 | 2567.944055 |             |                |             |
| 1479.363011            | 1017.069219                                           | 908.3589147 | 2127.839406 |             |                |             |
| 1134.930381            | 0.906690242                                           | 7.62E-06    | 0.0002321   | DPYSL2      |                |             |
| 8                      | 26514022                                              | 26658178    | +           | 7305        |                |             |
| protein_coding         | dihydropyrimidinase like 2 [Source:HGNC               |             |             |             |                |             |
| Symbol;Acc:HGNC:3014]  | -                                                     | 2243        | 2012        | 2209        | 1428           | 891         |
| 1053                   | 15.03618764                                           | 13.05071173 | 18.81405209 |             |                |             |
| 10.86225592            | 7.497299219                                           | 6.702536212 |             |             |                |             |
| ENSG00000132394        | 697.6759928                                           | 939.8648526 | 802.1192384 |             |                |             |
| 1184.11199             | 1529.59905                                            | 1618.310849 | 813.220028  |             |                |             |

|                 |                                                                                                  |             |             |                |
|-----------------|--------------------------------------------------------------------------------------------------|-------------|-------------|----------------|
| 1444.007296     | -0.828396727                                                                                     | 7.62E-06    | 0.0002321   | EEFSEC         |
| 3               | 128153454                                                                                        | 128408646   | + 2421      |                |
| protein_coding  | "eukaryotic elongation factor, selenocysteine-tRNA specific [Source:HGNC Symbol;Acc:HGNC:24614]" |             |             |                |
| 690             | 1143                                                                                             | 1340        | 1876        | 15.55464966    |
|                 | 17.73213985                                                                                      | 26.23393781 | 34.02180642 | 20.78529382    |
| ENSG0000094916  | 5912.554545                                                                                      | 5101.997058 | 5881.045257 | 36.03039827    |
| 4107.615082     | 3522.643782                                                                                      | 3573.050926 | 5631.86562  |                |
| 3734.436597     | 0.592647155                                                                                      | 7.64E-06    | 0.000232287 | CBX5           |
| 12              | 54230940                                                                                         | 54280133    | - 15040     |                |
| protein_coding  | chromobox 5 [Source:HGNC Symbol;Acc:HGNC:1555]                                                   |             |             | -              |
| 6517            | 5765                                                                                             | 5059        | 3965        | 3086           |
|                 | 18.16259572                                                                                      | 20.92780547 | 14.64898044 | 4142           |
|                 | 12.80540376                                                                                      |             |             | 21.2191786     |
| ENSG00000160695 | 1187.591514                                                                                      | 1141.643748 | 1162.49165  | 12.61233349    |
| 1752.858693     | 1843.509302                                                                                      | 1790.838658 | 1163.908971 |                |
| 1795.735551     | -0.625537572                                                                                     | 7.66E-06    | 0.000232293 | VPS11          |
| 11              | 119067692                                                                                        | 119081978   | + 5907      |                |
| protein_coding  | "VPS11, CORVET/HOPS core subunit [Source:HGNC Symbol;Acc:HGNC:14583]"                            |             |             | -              |
| 2076            | 10.85178946                                                                                      | 10.3478275  | 10.53270391 | 1615           |
| 15.91642149     | 16.80555719                                                                                      | 16.34148036 |             |                |
| ENSG0000024526  | 2199.176342                                                                                      | 1282.357977 | 1676.312959 |                |
| 615.365286      | 326.4666629                                                                                      | 233.7751813 | 1719.282426 |                |
| 391.8690434     | 2.133753187                                                                                      | 7.71E-06    | 0.000233428 | DEPDC1         |
| 1               | 68474152                                                                                         | 68497221    | - 5904      |                |
| protein_coding  | DEP domain containing 1 [Source:HGNC Symbol;Acc:HGNC:22949]                                      |             |             | -              |
| 271             | 20.10550335                                                                                      | 11.62916353 | 15.1958766  | 286            |
| 5.590519155     | 2.977604722                                                                                      | 2.134292608 |             |                |
| ENSG0000066279  | 4165.189185                                                                                      | 2153.193208 | 2836.479626 |                |
| 854.6740083     | 495.4074534                                                                                      | 232.0499032 | 3051.620673 |                |
| 527.3771216     | 2.533030718                                                                                      | 7.77E-06    | 0.0002348   | ASPM           |
| 1               | 197084128                                                                                        | 197146694   | - 10887     |                |
| protein_coding  | abnormal spindle microtubule assembly [Source:HGNC Symbol;Acc:HGNC:19048]                        |             |             | -              |
| 269             | 20.650366                                                                                        | 10.58913114 | 13.94403455 | 434            |
| 4.210733633     | 2.450354202                                                                                      | 1.148881074 |             |                |
| ENSG00000213347 | 290.3203091                                                                                      | 290.2784102 | 417.3345023 |                |
| 69.40988916     | 167.7992987                                                                                      | 43.99459131 | 332.6444072 |                |
| 93.73459307     | 1.833729453                                                                                      | 7.78E-06    | 0.000234885 | MXD3           |
| 5               | 177301461                                                                                        | 177312757   | - 5154      |                |
| protein_coding  | MAX dimerization protein 3 [Source:HGNC Symbol;Acc:HGNC:14008]                                   |             |             | bHLH           |
| 51              | 3.040424669                                                                                      | 3.015475959 | 4.333680411 | 147            |
| 0.722341276     | 1.753154863                                                                                      | 0.460104817 |             |                |
| ENSG00000136295 | 11910.39068                                                                                      | 11566.00166 | 14009.18687 |                |
| 8932.120363     | 8516.67053                                                                                       | 7530.838865 | 12495.19307 |                |
| 8326.543253     | 0.585570522                                                                                      | 8.02E-06    | 0.000241755 | TTYH3          |
| 7               | 2631951                                                                                          | 2664802     | + 6129      | protein_coding |
|                 |                                                                                                  |             |             | tweety         |

|                                                                 |                       |        |
|-----------------------------------------------------------------|-----------------------|--------|
| family member 3 [Source:HGNC Symbol;Acc:HGNC:22222]             | -                     | 13128  |
| 13069 12051 8622 7461 8730 104.8908561                          |                       |        |
| 101.0367057 122.3320664 78.16825928 74.82638753                 |                       |        |
| 66.23013503                                                     |                       |        |
| ENSG00000122966 1417.126009 861.9852791 1083.442218             |                       |        |
| 733.4656944 336.7400893 344.1929791 1120.851169                 |                       |        |
| 471.4662543 1.249697215 8.18E-06 0.000245981                    |                       | CIT    |
| 12 119685790 119877291 - 13230                                  |                       |        |
| protein_coding citron rho-interacting serine/threonine kinase   |                       |        |
| [Source:HGNC Symbol;Acc:HGNC:1985]                              | - 1562 974            | 932    |
| 708 295 399 5.781624325 3.488394182                             |                       |        |
| 4.382913653 2.973619918 1.370596227 1.402310125                 |                       |        |
| ENSG00000156467 1667.527275 2227.5328 2302.895958               |                       |        |
| 1106.414353 1065.011876 1402.651088 2065.985345                 |                       |        |
| 1191.359105 0.793201419 8.20E-06 0.000246319                    |                       | UQCRB  |
| 8 96225920 96235634 - 9715                                      |                       |        |
| protein_coding ubiquinol-cytochrome c reductase binding protein |                       |        |
| [Source:HGNC Symbol;Acc:HGNC:12582]                             | - 1838 2517           | 1981   |
| 1068 933 1626 9.264700526 12.27628187                           |                       |        |
| 12.68669553 6.108583172 5.903182352 7.782314085                 |                       |        |
| ENSG00000148848 1763.695878 1427.497182 1792.562124             |                       |        |
| 1107.450321 918.9009217 645.2540059 1661.251728                 |                       |        |
| 890.5350829 0.900229752 8.27E-06 0.000248035                    |                       | ADAM12 |
| 10 126012381 126388455 - 9860                                   |                       |        |
| protein_coding ADAM metalloproteinase domain 12 [Source:HGNC    |                       |        |
| Symbol;Acc:HGNC:190]                                            | - 1944 1613 1542 1069 | 805    |
| 748 9.654905541 7.751466836 9.730032825                         |                       |        |
| 6.024386601 5.018412146 3.527408045                             |                       |        |
| ENSG00000269378 536.1853209 498.2522712 646.3453573             |                       |        |
| 242.4166278 292.221908 308.8247782 560.2609831                  |                       |        |
| 281.154438 0.993099282 8.31E-06 0.000248763                     |                       |        |
| AC022149.1 19 14621634 14622242 - 609                           |                       |        |
| processed_pseudogene integrin beta 1 pseudogene 1               |                       |        |
| 591 563 556 234 256 358 47.5224554                              |                       |        |
| 43.80438053 56.80209392 21.35062577 25.83866271                 |                       |        |
| 27.33359481                                                     |                       |        |
| ENSG00000196950 822.8766261 521.2621452 785.8443553             |                       |        |
| 372.9486582 311.6272691 141.4728034 709.9943756                 |                       |        |
| 275.3495769 1.368702637 8.43E-06 0.000251407                    |                       |        |
| SLC39A10 2 195575977 195737702 + 6917                           |                       |        |
| protein_coding solute carrier family 39 member 10               |                       |        |
| [Source:HGNC Symbol;Acc:HGNC:20861]                             | - 907 589             | 676    |
| 360 273 164 6.42122954 4.034818096                              |                       |        |
| 6.080450634 2.891989879 2.426008016 1.102445402                 |                       |        |
| ENSG00000150764 1613.092218 1039.869305 1551.926353             |                       |        |
| 902.3285591 647.2258666 647.841923 1401.629292                  |                       |        |
| 732.4654495 0.936073374 8.43E-06 0.000251407                    |                       | DIXDC1 |
| 11 111927144 112022584 + 8509                                   |                       |        |
| protein_coding DIX domain containing 1 [Source:HGNC             |                       |        |
| Symbol;Acc:HGNC:23695]                                          | - 1778 1175 1335 871  | 567    |

|                                |                                                                                       |             |             |                |
|--------------------------------|---------------------------------------------------------------------------------------|-------------|-------------|----------------|
| 751                            | 10.23250385                                                                           | 6.543133537 | 9.76134334  |                |
| 5.687896367                    | 4.095924054                                                                           | 4.103859005 |             |                |
| ENSG00000143322                | 4996.23107                                                                            | 4806.408677 | 3651.386272 |                |
| 7714.857382                    | 6320.440253                                                                           | 7425.596902 | 4484.67534  |                |
| 7153.631512                    | -0.673431788                                                                          | 8.44E-06    | 0.000251407 | ABL2           |
| 1                              | 179099327                                                                             | 179229684   | -           | 13257          |
| protein_coding                 | "ABL proto-oncogene 2, non-receptor tyrosine kinase [Source:HGNC Symbol;Acc:HGNC:77]" |             |             |                |
|                                |                                                                                       | -           | 5507        | 5431           |
| 7447                           | 5537                                                                                  | 8608        | 20.34222735 | 19.41158452    |
| 14.74108759                    | 31.21390766                                                                           | 25.67300039 | 30.19173147 |                |
| ENSG00000140450                | 72.58007728                                                                           | 146.0242003 | 181.3486974 |                |
| 234.1288798                    | 552.4820448                                                                           | 454.6107769 | 133.3176583 |                |
| 413.7405672                    | -1.636860653                                                                          | 8.67E-06    | 0.000257899 | ARRDC4         |
| 15                             | 97960698                                                                              | 97973838    | +           | 4072           |
| protein_coding                 | arrestin domain containing 4 [Source:HGNC Symbol;Acc:HGNC:28087]                      |             |             |                |
|                                | -                                                                                     | 80          | 165         | 156            |
| 527                            | 0.962079368                                                                           | 1.920006132 | 2.383546757 | 484            |
| 3.083988241                    | 7.306088902                                                                           | 6.017746154 |             |                |
| ENSG00000152818                | 1226.603306                                                                           | 572.5918641 | 932.3183032 |                |
| 545.9553968                    | 238.5717921                                                                           | 226.8740689 | 910.5044911 |                |
| 337.1337526                    | 1.433735901                                                                           | 8.82E-06    | 0.000261794 | UTRN           |
| 6                              | 144285701                                                                             | 144853034   | +           | 14604          |
| protein_coding                 | utrophin [Source:HGNC Symbol;Acc:HGNC:12635]                                          |             |             |                |
|                                | -                                                                                     | 527         | 209         | 263            |
| 1352                           | 647                                                                                   | 802         | 4.533499278 |                |
| 2.099224552                    | 3.416720006                                                                           | 2.00516832  | 0.879674134 |                |
| 0.837365266                    |                                                                                       |             |             |                |
| ENSG00000137507                | 52.62055603                                                                           | 29.20484005 | 41.8496994  |                |
| 3.107905485                    | 0                                                                                     | 0           | 41.22503183 | 1.035968495    |
| 5.343108154                    | 8.85E-06                                                                              | 0.000262341 | LRR32       | 11             |
| 76657524                       | 76670747                                                                              | -           | 4459        | protein_coding |
| leucine rich repeat containing | 32 [Source:HGNC Symbol;Acc:HGNC:4161]                                                 |             |             |                |
|                                | -                                                                                     | 58          | 33          | 36             |
| 0.636970332                    | 0.350673468                                                                           | 0.502310059 | 0.037384866 | 0              |
| 0                              |                                                                                       |             |             |                |
| ENSG00000070081                | 995.2543097                                                                           | 723.0410401 | 867.2187708 |                |
| 536.6316804                    | 351.5794831                                                                           | 216.5224004 | 861.8380402 |                |
| 368.2445213                    | 1.228264637                                                                           | 9.20E-06    | 0.000272131 | NUCB2          |
| 11                             | 17208153                                                                              | 17349980    | +           | 9025           |
| protein_coding                 | nucleobindin 2 [Source:HGNC Symbol;Acc:HGNC:8044]                                     |             |             |                |
|                                | -                                                                                     | 1097        | 817         | 746            |
| 5.952345074                    | 4.289446809                                                                           | 5.142786125 | 308         | 251            |
| 2.097736168                    | 1.293175682                                                                           |             | 3.189294272 |                |
| ENSG00000147416                | 3531.928011                                                                           | 3846.188935 | 3838.547428 |                |
| 5262.719954                    | 5601.300401                                                                           | 5381.142364 | 3738.888125 |                |
| 5415.05424                     | -0.534401697                                                                          | 9.27E-06    | 0.000273822 |                |
| ATP6V1B2                       | 8                                                                                     | 20197367    | 20226819    | +              |
|                                |                                                                                       |             |             | 7816           |
| protein_coding                 | ATPase H+ transporting V1 subunit B2 [Source:HGNC Symbol;Acc:HGNC:854]                |             |             |                |
|                                | -                                                                                     |             | 3893        | 4346           |
| 5080                           | 4907                                                                                  | 6238        | 24.39093993 | 26.34702673    |
| 26.2844785                     | 36.11529821                                                                           | 38.59036333 | 37.11007549 |                |



|                         |                                                       |             |             |      |                |             |        |  |
|-------------------------|-------------------------------------------------------|-------------|-------------|------|----------------|-------------|--------|--|
| ENSG00000170558         | 1922.464797                                           |             | 1754.945389 |      | 2727.205411    |             |        |  |
| 1399.593437             | 851.5529038                                           |             | 1116.254925 |      | 2134.871865    |             |        |  |
| 1122.467088             | 0.926608414                                           |             | 9.32E-06    |      | 0.000274777    |             | CDH2   |  |
| 18                      | 27950966                                              |             | 28177446    |      | -              | 4950        |        |  |
| protein_coding          | cadherin 2 [Source:HGNC Symbol;Acc:HGNC:1759]         |             |             |      |                |             | -      |  |
| 2119                    | 1983                                                  | 2346        | 1351        | 746  | 1294           | 20.96304861 |        |  |
|                         | 18.98208685                                           | 29.48693656 | 15.16569068 |      |                | 9.263625483 |        |  |
|                         | 12.15514364                                           |             |             |      |                |             |        |  |
| ENSG00000164949         | 1330.937167                                           |             | 1520.421673 |      | 1213.641282    |             |        |  |
| 2024.282439             | 2111.759882                                           |             | 2347.240842 |      | 1355.000041    |             |        |  |
| 2161.094388             | -0.673084676                                          |             | 9.39E-06    |      | 0.000276439    |             | GEM    |  |
| 8                       | 94249253                                              |             | 94262350    |      | -              | 2648        |        |  |
| protein_coding          | GTP binding protein overexpressed in skeletal muscle  |             |             |      |                |             |        |  |
|                         | [Source:HGNC Symbol;Acc:HGNC:4234]                    |             |             |      |                |             | -      |  |
| 1954                    | 1850                                                  | 2721        | 27.12943921 |      | 30.7419647     |             | 1044   |  |
| 24.52953777             | 41.00328221                                           |             | 42.94386292 |      | 47.77949763    |             |        |  |
| ENSG00000181222         | 4880.102946                                           |             | 4474.535494 |      | 4749.940881    |             |        |  |
| 7116.067591             | 6407.193632                                           |             | 6870.057357 |      | 4701.526441    |             |        |  |
| 6797.77286              | -0.532023182                                          |             | 9.47E-06    |      | 0.00027817     |             | POLR2A |  |
| 17                      | 7484366                                               | 7514616     | +           | 8355 | protein_coding | RNA         |        |  |
| polymerase II subunit A | [Source:HGNC Symbol;Acc:HGNC:9187]                    |             |             |      |                |             | -      |  |
| 5379                    | 5056                                                  | 4086        | 6869        | 5613 | 7964           | 31.5270818  |        |  |
|                         | 28.67391885                                           | 30.42697339 | 45.68347225 |      |                | 41.29485526 |        |  |
|                         | 44.32163932                                           |             |             |      |                |             |        |  |
| ENSG00000108582         | 2550.282465                                           |             | 1983.274138 |      | 2622.581162    |             |        |  |
| 1628.542474             | 1319.564553                                           |             | 924.7490565 |      | 2385.379255    |             |        |  |
| 1290.952028             | 0.886241008                                           |             | 9.56E-06    |      | 0.000280555    |             | CPD    |  |
| 17                      | 30378905                                              |             | 30469989    |      | +              | 12532       |        |  |
| protein_coding          | carboxypeptidase D [Source:HGNC Symbol;Acc:HGNC:2301] |             |             |      |                |             |        |  |
| -                       | 2811                                                  | 2241        | 2256        | 1572 | 1156           | 1072        |        |  |
| 10.98421798             | 8.47320885                                            |             | 11.20019427 |      | 6.970183299    |             |        |  |
| 5.670022837             | 3.977456304                                           |             |             |      |                |             |        |  |
| ENSG00000143319         | 1754.623368                                           |             | 2164.698145 |      | 1798.374582    |             |        |  |
| 2748.424417             | 3015.82141                                            |             | 3158.121545 |      | 1905.898698    |             |        |  |
| 2974.122457             | -0.641804568                                          |             | 9.64E-06    |      | 0.000282219    |             |        |  |
| ISG20L2 1               | 156721891                                             |             | 156728799   |      | -              | 5262        |        |  |
| protein_coding          | interferon stimulated exonuclease gene 20 like 2      |             |             |      |                |             |        |  |
|                         | [Source:HGNC Symbol;Acc:HGNC:25745]                   |             |             |      |                |             | -      |  |
| 2653                    | 2642                                                  | 3661        | 17.998417   |      | 1934           | 2446        | 1547   |  |
| 18.29137344             | 28.01550465                                           |             | 30.86237399 |      | 22.02581818    |             |        |  |
| ENSG00000108861         | 2619.233539                                           |             | 3129.342861 |      | 32.3504185     |             |        |  |
| 3732.594487             | 4754.313464                                           |             | 4872.185328 |      | 2708.605544    |             |        |  |
| 4453.031093             | -0.659503712                                          |             | 9.67E-06    |      | 2819.060648    |             |        |  |
| 17                      | 43766121                                              |             | 43778988    |      | 0.000282219    |             | DUSP3  |  |
| protein_coding          | dual specificity phosphatase 3 [Source:HGNC           |             |             |      |                |             |        |  |
|                         | Symbol;Acc:HGNC:3069]                                 |             |             |      |                |             | -      |  |
| 5648                    | 28.20748755                                           |             | 2887        | 3536 | 2330           | 3603        | 4165   |  |
| 39.94525919             | 51.08004881                                           |             | 33.42932711 |      | 28.92355728    |             |        |  |
| ENSG00000135916         | 840.1143945                                           |             | 1144.298733 |      | 1225.266199    |             |        |  |
| 504.516657              | 691.7440479                                           |             | 406.3029903 |      | 1069.893109    |             |        |  |

|                                    |                                                   |                       |                |        |
|------------------------------------|---------------------------------------------------|-----------------------|----------------|--------|
| 534.1878984                        | 1.003356521                                       | 9.67E-06              | 0.000282219    | ITM2C  |
| 2                                  | 230864639                                         | 230879248             | + 2611         |        |
| protein_coding                     | integral membrane protein 2C                      | [Source:HGNC          |                |        |
| Symbol;Acc:HGNC:6175]              | -                                                 | 926 1293              | 1054 487       | 606    |
| 471                                | 17.36731968                                       | 23.46486683           | 25.11542812    |        |
| 10.36416058                        | 14.26635782                                       | 8.387741806           |                |        |
| ENSG00000135636                    | 29.03203091                                       | 22.12487883           | 54.63710754    | 0      |
| 0                                  | 0.862639045                                       | 35.26467243           | 0.287546348    |        |
| 6.608212879                        | 9.82E-06                                          | 0.000286079           | DYSF 2         |        |
| 71453722                           | 71686768                                          | + 8386                | protein_coding |        |
| dysferlin [Source:HGNC             | Symbol;Acc:HGNC:3097]                             | -                     | 32 25          |        |
| 47                                 | 0 0                                               | 1 0.186863209         | 0.141257525    |        |
| 0.348698313                        | 0                                                 | 0 0.005544676         |                |        |
| ENSG00000137135                    | 226.8127415                                       | 242.488672            | 280.1604876    |        |
| 106.704755                         | 107.3002318                                       | 76.77487503           | 249.8206337    |        |
| 96.92662062                        | 1.368286856                                       | 1.01E-05              | 0.00029415     |        |
| ARHGEF39                           | 9 35658875                                        | 35675866              | - 6496         |        |
| protein_coding                     | Rho guanine nucleotide exchange factor 39         |                       |                |        |
| [Source:HGNC                       | Symbol;Acc:HGNC:25909]                            | -                     | 250 274 241    |        |
| 103                                | 94 89                                             | 1.884615141           | 1.99862349     |        |
| 2.308223578                        | 0.881055471                                       | 0.889465684           | 0.637052183    |        |
| ENSG00000168874                    | 72.58007728                                       | 84.9595347            | 53.4746159     |        |
| 8.287747959                        | 10.27342645                                       | 0 70.33807596         | 6.187058138    |        |
| 3.544850405                        | 1.02E-05                                          | 0.000297634           | ATOH8 2        |        |
| 85751344                           | 85788066                                          | + 6076                | protein_coding |        |
| atonal bHLH transcription factor 8 | [Source:HGNC                                      |                       |                |        |
| Symbol;Acc:HGNC:24126]             | bHLH                                              | 80 96                 | 46 8 9         |        |
| 0                                  | 0.644764185                                       | 0.748651861           | 0.471028205    |        |
| 0.07316178                         | 0.091048355                                       | 0                     |                |        |
| ENSG00000139289                    | 6566.682492                                       | 6787.027829           | 6797.088677    |        |
| 8549.847988                        | 10627.28892                                       | 11063.34576           | 6716.932999    |        |
| 10080.16089                        | -0.585702094                                      | 1.04E-05              | 0.000301637    | PHLDA1 |
| 12                                 | 76025447                                          | 76033932              | - 8069         |        |
| protein_coding                     | pleckstrin homology like domain family A member 1 |                       |                |        |
| [Source:HGNC                       | Symbol;Acc:HGNC:8933]                             | -                     | 7238 7669 5847 |        |
| 8253                               | 9310 12825                                        | 43.9265957            | 45.03451222    |        |
| 45.08376994                        | 56.83347004                                       | 70.92140419           | 73.90412449    |        |
| ENSG00000125148                    | 13498.98712                                       | 13587.33059           | 13960.36222    |        |
| 19978.65242                        | 17744.49047                                       | 22997.09431           | 13682.22664    |        |
| 20240.07907                        | -0.565001403                                      | 1.04E-05              | 0.000301637    | MT2A   |
| 16                                 | 56608199                                          | 56609497              | + 1299         |        |
| protein_coding                     | metallothionein 2A [Source:HGNC                   | Symbol;Acc:HGNC:7406] |                |        |
| -                                  | 14879 15353                                       | 12009 19285           | 15545 26659    |        |
| 560.9101208                        | 560.0290297                                       | 575.1810117           | 824.9403294    |        |
| 735.5783452                        | 954.257807                                        |                       |                |        |
| ENSG00000136848                    | 1251.099082                                       | 1160.228646           | 1335.702906    |        |
| 850.5301343                        | 699.7344907                                       | 683.2101239           | 1249.010211    |        |
| 744.4915829                        | 0.746343924                                       | 1.05E-05              | 0.000303339    | DAB2IP |
| 9                                  | 121567057                                         | 121785530             | + 9127         |        |
| protein_coding                     | DAB2 interacting protein [Source:HGNC             |                       |                |        |

|                        |                                                        |                                     |          |             |       |        |
|------------------------|--------------------------------------------------------|-------------------------------------|----------|-------------|-------|--------|
| Symbol;Acc:HGNC:17294] | -                                                      | 1379                                | 1311     | 1149        | 821   | 613    |
| 792                    | 7.398861524                                            | 6.806143195                         |          | 7.832471527 |       |        |
| 4.998355602            | 4.128381129                                            | 4.034857016                         |          |             |       |        |
| ENSG00000006625        | 830.1346339                                            | 791.1856669                         |          | 683.5450901 |       |        |
| 405.0636815            | 372.126336                                             | 481.3525873                         |          | 768.2884636 |       |        |
| 419.5142016            | 0.872083092                                            | 1.06E-05                            |          | 0.000304494 |       | GGCT   |
| 7                      | 30496621                                               | 30504844                            |          | -           | 1597  |        |
| protein_coding         | gamma-glutamylcyclotransferase                         | [Source:HGNC                        |          |             |       |        |
| Symbol;Acc:HGNC:21705] | -                                                      | 915                                 | 894      | 588         | 391   | 326    |
| 558                    | 28.05723447                                            | 26.52522298                         |          | 22.90758235 |       |        |
| 13.60454072            | 12.54758205                                            | 16.24651818                         |          |             |       |        |
| ENSG00000114268        | 746.667545                                             | 654.0114182                         |          | 1276.415832 |       |        |
| 318.0423279            | 519.3787818                                            | 206.1707318                         |          | 892.3649316 |       |        |
| 347.8639472            | 1.360630953                                            | 1.06E-05                            |          | 0.000305711 |       | PFKFB4 |
| 3                      | 48517684                                               | 48562015                            |          | -           | 6107  |        |
| protein_coding         | "6-phosphofructo-2-kinase/fructose-2,6-biphosphatase 4 | [Source:HGNC Symbol;Acc:HGNC:8875]" |          |             |       |        |
| 307                    | 455                                                    | 239                                 | -        | 823         | 739   | 1098   |
| 11.18616618            | 2.79333163                                             | 4.579634695                         |          | 1.819705045 |       |        |
| ENSG00000096746        | 2185.567577                                            | 2479.756419                         |          | 2660.943387 |       |        |
| 1565.348396            | 1407.459424                                            | 1682.146138                         |          | 2442.089128 |       |        |
| 1551.651319            | 0.653557895                                            | 1.06E-05                            |          | 0.000306261 |       |        |
| HNRNPH3                | 10                                                     | 68331174                            | 68343191 | +           | 5373  |        |
| protein_coding         | heterogeneous nuclear ribonucleoprotein H3             | [Source:HGNC Symbol;Acc:HGNC:5043]  |          |             |       |        |
| 1511                   | 1233                                                   | 1950                                | -        | 2409        | 2802  | 2289   |
| 26.50548764            | 15.62642628                                            | 14.105666                           |          | 16.87519457 |       |        |
| ENSG00000170275        | 8194.290725                                            | 7568.478549                         |          | 8647.775384 |       |        |
| 5988.933869            | 5379.850986                                            | 4304.568836                         |          | 8136.848219 |       |        |
| 5224.45123             | 0.639325579                                            | 1.07E-05                            |          | 0.000307287 |       | CRTAP  |
| 3                      | 33113979                                               | 33147773                            |          | +           | 6695  |        |
| protein_coding         | cartilage associated protein                           | [Source:HGNC                        |          |             |       |        |
| Symbol;Acc:HGNC:2379]  | -                                                      | 9032                                | 8552     | 7439        | 5781  | 4713   |
| 4990                   | 66.06356884                                            | 60.52621994                         |          | 69.13067923 |       |        |
| 47.98046269            | 43.27072966                                            | 34.65620328                         |          |             |       |        |
| ENSG00000182473        | 1652.104009                                            | 1757.600374                         |          | 1823.949399 |       |        |
| 2368.223979            | 2870.851948                                            | 2860.511074                         |          | 1744.551261 |       |        |
| 2699.862334            | -0.630286086                                           | 1.08E-05                            |          | 0.000308639 |       | EXOC7  |
| 17                     | 76081017                                               | 76121576                            |          | -           | 10086 |        |
| protein_coding         | exocyst complex component 7                            | [Source:HGNC                        |          |             |       |        |
| Symbol;Acc:HGNC:23214] | -                                                      | 1821                                | 1986     | 1569        | 2286  | 2515   |
| 3316                   | 8.841372034                                            | 9.330109079                         |          | 9.678561775 |       |        |
| 12.59416288            | 15.32732569                                            | 15.28715173                         |          |             |       |        |
| ENSG00000213085        | 205.0387183                                            | 196.468924                          |          | 181.3486974 |       |        |
| 49.72648776            | 87.89487077                                            | 33.64292277                         |          | 194.2854466 |       |        |
| 57.08809376            | 1.776063741                                            | 1.13E-05                            |          | 0.000322941 |       | CFAP45 |
| 1                      | 159872364                                              | 159900163                           |          | -           | 2625  |        |
| protein_coding         | cilia and flagella associated protein 45               | [Source:HGNC                        |          |             |       |        |
| Symbol;Acc:HGNC:17229] | -                                                      | 226                                 | 222      | 156         | 48    | 77     |
| 39                     | 4.21607002                                             | 4.007283863                         |          | 3.697448531 |       |        |

|                        |                       |                                  |                        |             |         |             |
|------------------------|-----------------------|----------------------------------|------------------------|-------------|---------|-------------|
| 1.016070806            | 1.803054182           | 0.690822251                      |                        |             |         |             |
| ENSG00000231663        | 26.31027801           | 23.89486913                      | 23.249833              | 0           |         |             |
| 0                      | 0                     | 24.48499338                      | 0                      | 7.047196772 |         |             |
| 1.16E-05               | 0.000331705           | AL355472.1                       | 1                      | 234372807   |         |             |
| 234373593              | -                     | 575                              | antisense              |             |         |             |
| uncharacterized        | LOC101927765          | [Source:NCBI gene;Acc:101927765] | -                      |             |         |             |
| 29                     | 27                    | 20                               | 0                      | 0           | 0       | 2.469783226 |
| 2.224960782            | 2.164058505           | 0                                | 0                      | 0           |         |             |
| ENSG00000210144        | 19.05227029           | 87.61452016                      | 49.98714095            |             |         |             |
| 154.3593057            | 184.9216762           | 351.0940914                      | 52.21797713            |             |         |             |
| 230.1250244            | -2.139876601          | 1.17E-05                         | 0.000333932            |             |         | MT-TY       |
| MT                     | 5826                  | 5891                             | -                      | 66          | Mt_tRNA |             |
| mitochondrially        | encoded tRNA tyrosine | [Source:HGNC                     |                        |             |         |             |
| Symbol;Acc:HGNC:7502]  | -                     | 21                               | 99                     | 43          | 149     | 162         |
| 407                    | 15.58131267           | 71.07513608                      | 40.535111              |             |         |             |
| 125.4452948            | 150.8754016           | 286.7355176                      |                        |             |         |             |
| ENSG00000132669        | 1371.763461           | 1200.053428                      | 1191.553941            |             |         |             |
| 858.8178823            | 703.1589662           | 662.5067868                      | 1254.456943            |             |         |             |
| 741.4945451            | 0.759156153           | 1.20E-05                         | 0.00034066             |             |         | RIN2        |
| 20                     | 19757606              | 20002459                         | +                      | 8273        |         |             |
| protein_coding         | Ras and Rab           | interactor 2                     | [Source:HGNC           |             |         |             |
| Symbol;Acc:HGNC:18750] | -                     | 1512                             | 1356                   | 1025        | 829     | 616         |
| 768                    | 8.949884906           | 7.766459932                      | 7.708461145            |             |         |             |
| 5.568055428            | 4.576832809           | 4.31647484                       |                        |             |         |             |
| ENSG00000131389        | 2101.193237           | 2000.974041                      | 3168.952238            |             |         |             |
| 1493.86657             | 1386.912571           | 1240.474947                      | 2423.706505            |             |         |             |
| 1373.751363            | 0.818688546           | 1.20E-05                         | 0.000341143            |             |         | SLC6A6      |
| 3                      | 14402576              | 14489349                         | +                      | 8254        |         |             |
| protein_coding         | solute carrier        | family 6 member 6                | [Source:HGNC           |             |         |             |
| Symbol;Acc:HGNC:11052] | -                     | 2316                             | 2261                   | 2726        | 1442    | 1215        |
| 1438                   | 13.74050752           | 12.97963676                      | 20.54793738            |             |         |             |
| 9.707621604            | 9.048137122           | 8.10075392                       |                        |             |         |             |
| ENSG00000146938        | 18.14501932           | 19.46989337                      | 37.1997328             | 0           |         |             |
| 0                      | 0                     | 24.93821516                      | 0                      | 7.070600751 |         |             |
| 1.22E-05               | 0.000345432           | NLGN4X                           | X                      | 5840637     | 6228863 | -           |
| 7441                   | protein_coding        | neuroligin 4 X-linked            | [Source:HGNC           |             |         |             |
| Symbol;Acc:HGNC:14287] | -                     | 20                               | 22                     | 32          | 0       | 0           |
| 0                      | 0.131621663           | 0.140093446                      | 0.26756267             | 0           |         |             |
| 0                      | 0                     |                                  |                        |             |         |             |
| ENSG00000166503        | 1911.577785           | 1658.480917                      | 2059.935204            |             |         |             |
| 1268.025438            | 1118.661992           | 1145.584652                      | 1876.664635            |             |         |             |
| 1177.424027            | 0.672106906           | 1.22E-05                         | 0.000345438            |             |         | HDGFL3      |
| 15                     | 83112738              | 83208018                         | -                      | 16253       |         |             |
| protein_coding         | HDGF like 3           | [Source:HGNC                     | Symbol;Acc:HGNC:24937] | -           |         |             |
| 2107                   | 1874                  | 1772                             | 1224                   | 980         | 1328    | 6.348332771 |
| 5.463393631            | 6.783237588           | 4.184657576                      | 3.70629429             |             |         |             |
| 3.799229754            |                       |                                  |                        |             |         |             |
| ENSG00000135597        | 899.9929583           | 878.800187                       | 845.1314295            |             |         |             |
| 1218.29895             | 1555.853362           | 1551.887642                      | 874.6415249            |             |         |             |
| 1442.013318            | -0.721165992          | 1.22E-05                         | 0.00034653             |             |         | REPS1       |

|                  |                                                        |             |             |       |                                 |
|------------------|--------------------------------------------------------|-------------|-------------|-------|---------------------------------|
| 6                | 138903493                                              | 138988261   | -           | 9602  |                                 |
| protein_coding   | RALBP1 associated Eps domain containing 1 [Source:HGNC |             |             |       |                                 |
| Symbol;Acc:HGNC: | 15578]                                                 | -           | 992         | 993   | 727 1176 1363                   |
| 1799             | 5.05916279                                             | 4.90020205  | 4.710636098 |       |                                 |
| 6.80546279       | 8.725323029                                            | 8.711651224 |             |       |                                 |
| ENSG00000147862  | 332.0538535                                            | 284.9684393 | 363.8598864 |       |                                 |
| 179.2225496      | 106.15874                                              | 105.2419635 | 326.9607264 |       |                                 |
| 130.2077511      | 1.328357764                                            | 1.23E-05    | 0.000347646 | NFIB  |                                 |
| 9                | 14081843                                               | 14398983    | -           | 12765 |                                 |
| protein_coding   | nuclear factor I B [Source:HGNC                        |             |             |       |                                 |
| CTF/NFI          | 366                                                    | 322         | 313         | 173   | 93 122                          |
| 1.404070613      | 1.195257544                                            | 1.525563766 | 0.753073434 |       |                                 |
| 0.447826191      | 0.444395886                                            |             |             |       |                                 |
| ENSG00000052795  | 704.0267496                                            | 700.0311661 | 527.7712091 |       |                                 |
| 1120.917911      | 1047.889498                                            | 1171.463823 | 643.9430416 |       |                                 |
| 1113.423744      | -0.788786479                                           | 1.24E-05    | 0.000349347 | FNIP2 |                                 |
| 4                | 158769138                                              | 158908049   | +           | 10868 |                                 |
| protein_coding   | folliculin interacting protein 2 [Source:HGNC          |             |             |       |                                 |
| Symbol;Acc:HGNC: | 29280]                                                 | -           | 776         | 791   | 454 1082 918                    |
| 1358             | 3.49655831                                             | 3.448683146 | 2.599040636 |       |                                 |
| 5.532095576      | 5.192068477                                            | 5.810067237 |             |       |                                 |
| ENSG00000126522  | 412.7991895                                            | 488.5173245 | 549.8585504 |       |                                 |
| 279.7114936      | 203.1855454                                            | 212.2092051 | 483.7250215 |       |                                 |
| 231.7020814      | 1.061179245                                            | 1.24E-05    | 0.000350614 | ASL   |                                 |
| 7                | 66075798                                               | 66093558    | +           | 3195  |                                 |
| protein_coding   | argininosuccinate lyase [Source:HGNC                   |             |             |       |                                 |
| Symbol;Acc:HGNC: | 746]                                                   | -           | 455         | 552   | 473 270 178                     |
| 246              | 6.973795657                                            | 8.18643195  | 9.210795176 |       |                                 |
| 4.695749764      | 3.424494713                                            | 3.580100867 |             |       |                                 |
| ENSG00000148180  | 2435.968844                                            | 2136.3783   | 3223.589345 |       |                                 |
| 1706.240111      | 1530.740542                                            | 1238.749669 | 2598.645496 |       |                                 |
| 1491.910107      | 0.800523799                                            | 1.26E-05    | 0.000354085 | GSN   |                                 |
| 9                | 121207794                                              | 121332843   | +           | 11018 |                                 |
| protein_coding   | gelsolin [Source:HGNC                                  |             |             |       |                                 |
| Symbol;Acc:HGNC: | 4620]                                                  | -           | 2685        | 2414  | 2773 1647 1341 1436 11.93356507 |
| 10.38151985      | 15.6586367                                             | 8.306209386 | 7.481236258 |       |                                 |
| 6.060140457      |                                                        |             |             |       |                                 |
| ENSG00000131724  | 2086.677222                                            | 1735.475495 | 2120.384769 |       |                                 |
| 1194.471675      | 1319.564553                                            | 1252.551894 | 1980.845829 |       |                                 |
| 1255.529374      | 0.657643892                                            | 1.26E-05    | 0.000354087 |       |                                 |
| IL13RA1 X        | 118727572                                              | 118794539   | +           | 4372  |                                 |
| protein_coding   | interleukin 13 receptor subunit alpha 1 [Source:HGNC   |             |             |       |                                 |
| Symbol;Acc:HGNC: | 5974]                                                  | -           | 2300        | 1961  | 1824 1153 1156                  |
| 1452             | 25.76180961                                            | 21.25317808 | 25.9568225  |       |                                 |
| 14.65416906      | 16.25268211                                            | 15.44249542 |             |       |                                 |
| ENSG00000073050  | 780.2358307                                            | 900.9250659 | 918.3684034 |       |                                 |
| 558.3870188      | 468.0116496                                            | 451.1602207 | 866.5097667 |       |                                 |
| 492.5196297      | 0.815075638                                            | 1.29E-05    | 0.00036097  | XRCC1 |                                 |
| 19               | 43543040                                               | 43580473    | -           | 3459  |                                 |
| protein_coding   | X-ray repair cross complementing 1 [Source:HGNC        |             |             |       |                                 |

|                                                           |                                                                                                   |             |       |             |                |             |
|-----------------------------------------------------------|---------------------------------------------------------------------------------------------------|-------------|-------|-------------|----------------|-------------|
| Symbol;Acc:HGNC:12828]                                    | -                                                                                                 | 860         | 1018  | 790         | 539            | 410         |
| 523                                                       | 12.17521314                                                                                       | 13.94516499 |       | 14.20964984 |                |             |
| 8.658651234                                               | 7.285857199                                                                                       | 7.030434153 |       |             |                |             |
| ENSG00000244038                                           | 6425.151341                                                                                       | 7141.025891 |       | 7115.611389 |                |             |
| 4785.138478                                               | 4939.235141                                                                                       | 3683.468723 |       | 6893.92954  |                |             |
| 4469.280781                                               | 0.625549679                                                                                       | 1.31E-05    |       | 0.000366065 |                | DDOST       |
| 1                                                         | 20651767                                                                                          | 20661544    |       | -           | 2721           |             |
| protein_coding                                            | dolichyl-diphosphooligosaccharide--protein glycosyltransferase non-catalytic subunit [Source:HGNC |             |       |             |                |             |
| Symbol;Acc:HGNC:2728]                                     | -                                                                                                 | 7082        | 8069  | 6121        | 4619           | 4327        |
| 4270                                                      | 127.4547614                                                                                       | 140.5133586 |       | 139.9589528 |                |             |
| 94.32601                                                  | 97.74751237                                                                                       | 72.96764862 |       |             |                |             |
| ENSG00000119574                                           | 664.1077071                                                                                       | 858.4452985 |       | 735.8572144 |                |             |
| 1000.745566                                               | 1554.71187                                                                                        | 1685.596694 |       | 752.8034067 |                |             |
| 1413.68471                                                | -0.909187771                                                                                      | 1.31E-05    |       | 0.000366275 |                | ZBTB45      |
| 19                                                        | 58513530                                                                                          | 58538911    |       | -           | 3418           |             |
| protein_coding                                            | zinc finger and BTB domain containing 45 [Source:HGNC                                             |             |       |             |                |             |
| Symbol;Acc:HGNC:23715]                                    | ZBTB                                                                                              | 732         | 970   | 633         | 966            | 1362        |
| 1954                                                      | 10.48739694                                                                                       | 13.44702204 |       | 11.52228195 |                |             |
| 15.7042468                                                | 24.49358805                                                                                       | 26.58174694 |       |             |                |             |
| ENSG00000138696                                           | 228.6272434                                                                                       | 249.5686332 |       | 122.0616232 |                |             |
| 387.4522171                                               | 448.6062885                                                                                       | 686.66068   |       | 200.0858333 |                |             |
| 507.5730619                                               | -1.340455974                                                                                      | 1.34E-05    |       | 0.000373779 |                | BMPR1B      |
| 4                                                         | 94757968                                                                                          | 95158448    |       | +           | 6312           |             |
| protein_coding                                            | bone morphogenetic protein receptor type 1B                                                       |             |       |             |                |             |
| [Source:HGNC Symbol;Acc:HGNC:1077]                        |                                                                                                   | -           |       | 252         | 282            | 105         |
| 374                                                       | 393                                                                                               | 796         |       | 1.955069651 | 2.116940048    |             |
| 1.034973322                                               | 3.292430799                                                                                       | 3.827127407 |       | 5.863772274 |                |             |
| ENSG00000125484                                           | 1521.45987                                                                                        | 1301.82787  |       | 1356.627755 |                |             |
| 2014.958723                                               | 2126.599276                                                                                       | 2381.746404 |       | 1393.305165 |                |             |
| 2174.434801                                               | -0.642283806                                                                                      | 1.34E-05    |       | 0.000374116 |                | GTF3C4      |
| 9                                                         | 132670035                                                                                         | 132694955   |       | +           | 9043           |             |
| protein_coding                                            | general transcription factor IIIC subunit 4                                                       |             |       |             |                |             |
| [Source:HGNC Symbol;Acc:HGNC:4667]                        |                                                                                                   | -           |       | 1677        | 1471           | 1167        |
| 1945                                                      | 1863                                                                                              | 2761        |       | 9.081324936 | 7.707731592    |             |
| 8.029068661                                               | 11.95140926                                                                                       | 12.66332299 |       | 14.19661791 |                |             |
| ENSG00000153214                                           | 657.7569503                                                                                       | 484.0923488 |       | 581.2458249 |                |             |
| 336.6897608                                               | 276.2410224                                                                                       | 260.5169917 |       | 574.3650413 |                |             |
| 291.1492583                                               | 0.98063296                                                                                        | 1.36E-05    |       | 0.000378395 |                |             |
| TMEM87B 2                                                 | 112055223                                                                                         | 112119318   |       | +           | 5367           |             |
| protein_coding                                            | transmembrane protein 87B [Source:HGNC                                                            |             |       |             |                |             |
| Symbol;Acc:HGNC:25913]                                    | -                                                                                                 | 725         | 547   | 500         | 325            | 242         |
| 302                                                       | 6.61507991                                                                                        | 4.829277615 |       | 5.796225266 |                |             |
| 3.364835283                                               | 2.77160369                                                                                        | 2.616413407 |       |             |                |             |
| ENSG00000115268                                           | 17403.79528                                                                                       | 19991.15551 |       | 21638.61957 |                |             |
| 26575.6998                                                | 30109.12995                                                                                       | 29853.34944 |       | 19677.85679 |                |             |
| 28846.05973                                               | -0.551856096                                                                                      | 1.37E-05    |       | 0.000379909 |                | RPS15       |
| 19                                                        | 1438358                                                                                           | 1440494     | +     | 2137        | protein_coding |             |
| ribosomal protein S15 [Source:HGNC Symbol;Acc:HGNC:10388] |                                                                                                   | -           |       |             |                |             |
| 19183                                                     | 22589                                                                                             | 18614       | 25653 | 26377       | 34607          | 439.5827971 |

|                 |                                                                      |             |                        |             |             |
|-----------------|----------------------------------------------------------------------|-------------|------------------------|-------------|-------------|
|                 | 500.8629696                                                          | 541.9285535 | 667.0304848            | 758.6967739 |             |
|                 | 752.9921504                                                          |             |                        |             |             |
| ENSG00000229689 | 395.5614212                                                          | 485.8623391 | 224.3608884            |             |             |
| 836.0265754     | 652.9333257                                                          | 984.2711507 | 368.5948829            |             |             |
| 824.4103506     | -1.159303064                                                         | 1.39E-05    | 0.000384834            |             |             |
| AC009237.3      | 2                                                                    | 95525345    | 95532405               | +           | 4978        |
|                 | transcribed_unprocessed_pseudogene                                   |             | Ankyrin repeat domain- |             |             |
|                 | containing protein pseudogene                                        |             | -                      | 436         | 549         |
|                 | 572                                                                  | 1141        | 4.289041817            | 5.225693011 | 193         |
|                 | 9.008047884                                                          | 7.062988461 | 10.65765777            |             | 807         |
| ENSG00000183853 | 5155.90724                                                           | 4963.052819 | 5550.897628            |             |             |
| 3906.637194     | 3398.221172                                                          | 3197.802941 | 5223.285896            |             |             |
| 3500.887103     | 0.577241473                                                          | 1.39E-05    | 0.000385014            |             |             |
| KIRREL1         | 1                                                                    | 157993273   | 158100262              | +           | 7872        |
|                 | protein_coding kirre like nephrin family adhesion molecule 1         |             |                        |             |             |
|                 | [Source:HGNC Symbol;Acc:HGNC:15734]                                  |             |                        |             |             |
|                 | 3771                                                                 | 2977        | 3707                   | 35.35259143 | 33.75587425 |
| 37.73941267     | 26.61849461                                                          | 23.24561868 | 21.89618828            |             |             |
| ENSG00000119227 | 156.9544171                                                          | 228.3287495 | 163.9113226            |             |             |
| 381.2364061     | 439.4743538                                                          | 376.9732628 | 183.0648298            |             |             |
| 399.2280076     | -1.122641157                                                         | 1.40E-05    | 0.000387535            |             | PIGZ        |
|                 | 3                                                                    | 196946343   | 196969060              | -           | 3211        |
|                 | protein_coding phosphatidylinositol glycan anchor biosynthesis class |             |                        |             |             |
|                 | Z [Source:HGNC Symbol;Acc:HGNC:30596]                                |             |                        |             |             |
|                 | 368                                                                  | 385         | 437                    | 2.638362594 | 3.80720131  |
| 2.732031194     | 6.368241971                                                          | 7.370005028 | 6.328082748            |             |             |
| ENSG00000100714 | 3408.541879                                                          | 3089.51808  | 3375.875751            |             |             |
| 2343.360735     | 2216.77713                                                           | 1793.426575 | 3291.311903            |             |             |
| 2117.854814     | 0.636443985                                                          | 1.42E-05    | 0.00039163             |             | MTHFD1      |
|                 | 14                                                                   | 64388031    | 64463457               | +           | 9377        |
|                 | protein_coding "methylenetetrahydrofolate dehydrogenase,             |             |                        |             |             |
|                 | cyclohydrolase and formyltetrahydrofolate synthetase 1 [Source:HGNC  |             |                        |             |             |
|                 | Symbol;Acc:HGNC:7432]"                                               |             |                        |             |             |
|                 | 2079                                                                 | 19.62031441 | 17.64056024            | 19.26812888 |             |
| 13.40419472     | 12.73012505                                                          | 10.30911992 |                        |             |             |
| ENSG00000136960 | 160.583421                                                           | 190.2739579 | 174.3737475            |             |             |
| 74.58973163     | 50.22564044                                                          | 46.58250844 | 175.0770421            |             |             |
| 57.13262684     | 1.617294332                                                          | 1.45E-05    | 0.000399312            |             | ENPP2       |
|                 | 8                                                                    | 119557086   | 119673453              | -           | 6729        |
|                 | protein_coding ectonucleotide pyrophosphatase/phosphodiesterase 2    |             |                        |             |             |
|                 | [Source:HGNC Symbol;Acc:HGNC:3357]                                   |             |                        |             |             |
|                 | 72                                                                   | 44          | 54                     | 1.288105461 | 1.513959901 |
| 1.386907758     | 0.594557705                                                          | 0.401929153 | 0.373142099            |             |             |
| ENSG00000173334 | 299.3928188                                                          | 384.0878965 | 275.510521             |             |             |
| 554.2431448     | 611.8396199                                                          | 695.2870705 | 319.6637454            |             |             |
| 620.4566117     | -0.95562333                                                          | 1.45E-05    | 0.000399614            |             | TRIB1       |
|                 | 8                                                                    | 125430321   | 125438405              | +           | 4138        |
|                 | protein_coding tribbles pseudokinase 1 [Source:HGNC                  |             |                        |             |             |
|                 | Symbol;Acc:HGNC:16891]                                               |             |                        |             |             |
|                 | 806                                                                  | 3.905279639 | 4.969648632            | 3.563401072 | 536         |

|                              |                                                |             |                |             |      |             |
|------------------------------|------------------------------------------------|-------------|----------------|-------------|------|-------------|
| 7.184149137                  | 7.961990656                                    | 9.056816604 |                |             |      |             |
| ENSG00000106105              | 5228.487317                                    | 5787.868301 | 6210.030394    |             |      |             |
| 7885.792183                  | 8400.238364                                    | 8796.330345 | 5742.128671    |             |      |             |
| 8360.786964                  | -0.542249488                                   | 1.45E-05    | 0.000399614    | GARS        |      |             |
| 7                            | 30594681                                       | 30634033    | + 4152         |             |      |             |
| protein_coding               | glycyl-tRNA synthetase [Source:HGNC            |             |                |             |      |             |
| Symbol;Acc:HGNC:4162]        | -                                              | 5763        | 6540           | 5342        | 7612 | 7359        |
| 10197                        | 67.97042075                                    | 74.6357402  | 80.04853451    |             |      |             |
| 101.8716824                  | 108.9453801                                    | 114.194738  |                |             |      |             |
| ENSG00000183876              | 178.7284403                                    | 219.478798  | 261.5606212    |             |      |             |
| 102.560881                   | 63.92354238                                    | 58.65945508 | 219.9226198    |             |      |             |
| 75.04795948                  | 1.551448243                                    | 1.48E-05    | 0.00040457     | ARSI        |      |             |
| 5                            | 150296343                                      | 150339307   | - 3269         |             |      |             |
| protein_coding               | arylsulfatase family member I [Source:HGNC     |             |                |             |      |             |
| Symbol;Acc:HGNC:32521]       | -                                              | 197         | 248            | 225         | 99   | 56          |
| 68                           | 2.951073248                                    | 3.594704548 | 4.282273922    |             |      |             |
| 1.682799281                  | 1.052980835                                    | 0.967219426 |                |             |      |             |
| ENSG00000145833              | 3654.406891                                    | 2724.900076 | 3173.602204    |             |      |             |
| 2312.281681                  | 1767.02935                                     | 1484.601797 | 3184.303057    |             |      |             |
| 1854.637609                  | 0.780152791                                    | 1.48E-05    | 0.000405873    | DDX46       |      |             |
| 5                            | 134758771                                      | 134855133   | + 9222         |             |      |             |
| protein_coding               | DEAD-box helicase 46 [Source:HGNC              |             |                |             |      |             |
| Symbol;Acc:HGNC:18681]       | -                                              | 4028        | 3079           | 2730        | 2232 | 1548        |
| 1721                         | 21.38912544                                    | 15.82016511 | 18.41808088    |             |      |             |
| 13.44872509                  | 10.31794477                                    | 8.677343118 |                |             |      |             |
| ENSG00000149639              | 2849.675284                                    | 2031.063876 | 2637.693554    |             |      |             |
| 1752.858693                  | 1303.583668                                    | 915.260027  | 2506.144238    |             |      |             |
| 1323.900796                  | 0.921145451                                    | 1.53E-05    | 0.000417618    | SOGA1       |      |             |
| 20                           | 36777442                                       | 36863686    | - 15128        |             |      |             |
| protein_coding               | "suppressor of glucose, autophagy associated 1 |             |                |             |      |             |
| [Source:HGNC                 | Symbol;Acc:HGNC:16111]"                        | -           | 3141           | 2295        | 2269 |             |
| 1692                         | 1142                                           | 1061        | 10.16752161    | 7.18832352  |      |             |
| 9.331679764                  | 6.214853369                                    | 4.640149233 | 3.26110578     |             |      |             |
| ENSG00000145794              | 86.18884177                                    | 26.54985459 | 52.31212425    |             |      |             |
| 7.251779464                  | 0                                              | 0           | 55.0169402     | 2.417259821 |      |             |
| 4.525538801                  | 1.54E-05                                       | 0.000420138 | MEGF10         | 5           |      |             |
| 127290831                    | 127465737                                      | + 9007      | protein_coding |             |      |             |
| multiple EGF like domains 10 | [Source:HGNC                                   |             |                |             |      |             |
| Symbol;Acc:HGNC:29634]       | -                                              | 95          | 30             | 45          | 7    | 0           |
| 0.516502141                  | 0.157821996                                    | 0.310841644 | 0.043184701    | 0           | 0    | 0           |
| 0                            |                                                |             |                |             |      |             |
| ENSG00000255921              | 63.50756762                                    | 54.86969949 | 20.9248497     |             |      |             |
| 143.9996208                  | 142.6864785                                    | 270.0060212 | 46.43403894    |             |      |             |
| 185.5640402                  | -1.991438867                                   | 1.60E-05    | 0.000436266    |             |      |             |
| AC026310.2                   | 12                                             | 24949163    | 24960158       | + 728       |      |             |
| antisense                    | "novel transcript, antisense to BCAT1"         |             |                |             |      |             |
| 70                           | 62                                             | 18          | 139            | 125         | 313  | 4.708638445 |
| 4.035401499                  | 1.538324555                                    | 10.60951337 | 10.55421638    |             |      |             |
| 19.99143533                  |                                                |             |                |             |      |             |
| ENSG00000135506              | 1038.802356                                    | 1217.753331 | 1671.662993    |             |      |             |



|                                      |                                                         |             |             |        |
|--------------------------------------|---------------------------------------------------------|-------------|-------------|--------|
| 664.0558052                          | 751.1016229                                             | 759.1223598 | 1309.406226 |        |
| 724.7599293                          | 0.852284384                                             | 1.64E-05    | 0.000447365 | 0S9    |
| 12                                   | 57693955                                                | 57721557    | + 5169      |        |
| protein_coding                       | "OS9, endoplasmic reticulum lectin [Source:HGNC         |             |             |        |
| Symbol;Acc:HGNC:16994]"              | -                                                       | 1145 1376   | 1438 641    | 658    |
| 880                                  | 10.84744953                                             | 12.61357932 | 17.30849076 |        |
| 6.89070315                           | 7.824682452                                             | 7.916025018 |             |        |
| ENSG00000152767                      | 955.3352672                                             | 803.575599  | 1115.991984 |        |
| 624.6890024                          | 489.6999943                                             | 409.7535465 | 958.30095   |        |
| 508.0475144                          | 0.915663513                                             | 1.66E-05    | 0.000452124 | FARP1  |
| 13                                   | 98142562                                                | 98455176    | + 36228     |        |
| protein_coding                       | "FERM, ARH/RhoGEF and pleckstrin domain protein 1       |             |             |        |
| [Source:HGNC Symbol;Acc:HGNC:3591]"  | -                                                       | 1053 908    |             | 960    |
| 603                                  | 429 475                                                 | 1.423353245 | 1.187593824 |        |
| 1.648669944                          | 0.924879166                                             | 0.72788085  | 0.609649566 |        |
| ENSG00000135124                      | 221.3692357                                             | 292.0484005 | 263.8856045 |        |
| 546.9913653                          | 485.134027                                              | 483.0778654 | 259.1010803 |        |
| 505.0677525                          | -0.962957551                                            | 1.69E-05    | 0.000458717 | P2RX4  |
| 12                                   | 121209857                                               | 121234106   | + 8159      |        |
| protein_coding                       | purinergic receptor P2X 4 [Source:HGNC                  |             |             |        |
| Symbol;Acc:HGNC:8535]"               | -                                                       | 244 330     | 227 528     | 425    |
| 560                                  | 1.4644737                                               | 1.916476276 | 1.73099483  |        |
| 3.595911818                          | 3.201838019                                             | 3.191406403 |             |        |
| ENSG00000198585                      | 703.1194986                                             | 723.9260353 | 734.6947227 |        |
| 453.7542008                          | 312.7687609                                             | 403.7150732 | 720.5800855 |        |
| 390.079345                           | 0.88422043                                              | 1.69E-05    | 0.000458717 | NUDT16 |
| 3                                    | 131381671                                               | 131388830   | + 7029      |        |
| protein_coding                       | nudix hydrolase 16 [Source:HGNC Symbol;Acc:HGNC:26442]" |             |             |        |
| -                                    | 775 818                                                 | 632 438     | 274 468     |        |
| 5.399292342                          | 5.514246817                                             | 5.59410201  | 3.462522553 |        |
| 2.396096913                          | 3.095874364                                             |             |             |        |
| ENSG00000182810                      | 418.2426953                                             | 497.3672761 | 420.8219773 |        |
| 680.6313012                          | 788.7708533                                             | 1066.22186  | 445.4773162 |        |
| 845.2080048                          | -0.924333958                                            | 1.70E-05    | 0.000459397 | DDX28  |
| 16                                   | 68021274                                                | 68023442    | - 2169      |        |
| protein_coding                       | DEAD-box helicase 28 [Source:HGNC                       |             |             |        |
| Symbol;Acc:HGNC:17330]"              | -                                                       | 461 562     | 362 657     | 691    |
| 1236                                 | 10.40806646                                             | 12.27730951 | 10.38378925 |        |
| 16.83130776                          | 19.58239721                                             | 26.49658702 |             |        |
| ENSG00000116786                      | 2405.122311                                             | 2918.714015 | 2578.406479 |        |
| 3430.091687                          | 4323.971045                                             | 4955.861315 | 2634.080935 |        |
| 4236.641349                          | -0.685713765                                            | 1.71E-05    | 0.0004609   |        |
| PLEKHM2 1                            | 15684332                                                | 15734769    | + 4122      |        |
| protein_coding                       | pleckstrin homology and RUN domain containing M2        |             |             |        |
| [Source:HGNC Symbol;Acc:HGNC:29131]" | -                                                       | 2651 3298   |             | 2218   |
| 3311                                 | 3788 5745                                               | 31.4941886  | 37.91133734 |        |
| 33.47806907                          | 44.63373565                                             | 56.48710834 | 64.80567876 |        |
| ENSG00000134910                      | 4392.001926                                             | 3732.024561 | 4722.041082 |        |
| 3189.746996                          | 2421.104168                                             | 1944.388408 | 4282.022523 |        |
| 2518.41319                           | 0.765929105                                             | 1.75E-05    | 0.000472879 | STT3A  |

|                 |                                                                                                        |             |             |             |           |
|-----------------|--------------------------------------------------------------------------------------------------------|-------------|-------------|-------------|-----------|
| 11              | 125591712                                                                                              | 125625215   | +           | 7393        |           |
| protein_coding  | "STT3A, catalytic subunit of the oligosaccharyltransferase complex [Source:HGNC Symbol;Acc:HGNC:6172]" |             |             |             |           |
| -               | 4841                                                                                                   | 4217        | 4062        | 3079        | 2121 2254 |
| 32.0658724      | 27.0277153                                                                                             | 34.18425028 | 23.14200731 |             |           |
| 17.63466941     | 14.17634336                                                                                            |             |             |             |           |
| ENSG00000142694 | 295.7638149                                                                                            | 515.0671791 | 385.9472278 |             |           |
| 137.7838098     | 213.4589719                                                                                            | 145.7859987 | 398.9260739 |             |           |
| 165.6762601     | 1.27033408                                                                                             | 1.76E-05    | 0.000472879 |             | EVA1B     |
| 1               | 36322031                                                                                               | 36324154    | -           | 1211        |           |
| protein_coding  | eva-1 homolog B [Source:HGNC Symbol;Acc:HGNC:25558]                                                    |             |             |             |           |
| -               | 326                                                                                                    | 582         | 332         | 133         | 187 169   |
| 13.18263236     | 22.77221536                                                                                            | 17.05692686 | 6.102665155 |             |           |
| 9.49171793      | 6.488937327                                                                                            |             |             |             |           |
| ENSG00000104147 | 174.1921855                                                                                            | 133.6342681 | 124.3866065 |             |           |
| 52.83439324     | 39.95221399                                                                                            | 33.64292277 | 144.07102   |             |           |
| 42.14317666     | 1.776998672                                                                                            | 1.78E-05    | 0.000478786 |             | OIP5      |
| 15              | 41309268                                                                                               | 41332621    | -           | 1236        |           |
| protein_coding  | Opa interacting protein 5 [Source:HGNC Symbol;Acc:HGNC:20300]                                          |             |             |             |           |
| -               |                                                                                                        | 192         | 151         | 107         | 51 35     |
| 39              | 7.606965411                                                                                            | 5.788751644 | 5.386071986 |             |           |
| 2.292787203     | 1.740591802                                                                                            | 1.467158907 |             |             |           |
| ENSG00000165389 | 1036.080603                                                                                            | 1034.559334 | 1322.915498 |             |           |
| 744.8613478     | 601.5661934                                                                                            | 615.9242783 | 1131.185145 |             |           |
| 654.1172732     | 0.789471282                                                                                            | 1.78E-05    | 0.000478914 |             | SPTSSA    |
| 14              | 34432789                                                                                               | 34462356    | -           | 2777        |           |
| protein_coding  | serine palmitoyltransferase small subunit A [Source:HGNC Symbol;Acc:HGNC:20361]                        |             |             |             |           |
| -               |                                                                                                        |             | 1142        | 1169        | 1138      |
| 719             | 527                                                                                                    | 714         | 20.13811923 | 19.94642518 |           |
| 25.49606918     | 14.38682809                                                                                            | 11.66492889 | 11.95510377 |             |           |
| ENSG00000109674 | 381.0454057                                                                                            | 323.908226  | 495.2214429 |             |           |
| 225.8411319     | 103.8757564                                                                                            | 71.59904076 | 400.0583582 |             |           |
| 133.7719763     | 1.581692157                                                                                            | 1.83E-05    | 0.000490896 |             | NEIL3     |
| 4               | 177309836                                                                                              | 177362943   | +           | 2959        |           |
| protein_coding  | nei like DNA glycosylase 3 [Source:HGNC Symbol;Acc:HGNC:24573]                                         |             |             |             |           |
| -               |                                                                                                        | 420         | 366         | 426         | 218 91    |
| 83              | 6.950771453                                                                                            | 5.860876379 | 8.957183688 |             |           |
| 4.093771254     | 1.890356815                                                                                            | 1.30425991  |             |             |           |
| ENSG00000228716 | 2034.963917                                                                                            | 1675.295825 | 2068.072645 |             |           |
| 1429.636523     | 730.55477                                                                                              | 804.8422292 | 1926.110796 |             |           |
| 988.3445074     | 0.962519519                                                                                            | 1.86E-05    | 0.000497417 |             | DHFR      |
| 5               | 80626228                                                                                               | 80654983    | -           | 4409        |           |
| protein_coding  | dihydrofolate reductase [Source:HGNC Symbol;Acc:HGNC:2861]                                             |             |             |             |           |
| -               |                                                                                                        | 2243        | 1893        | 1779        | 1380 640  |
| 933             | 24.91253135                                                                                            | 20.34402852 | 25.10398668 |             |           |
| 17.39206025     | 8.922513944                                                                                            | 9.839489419 |             |             |           |
| ENSG00000185697 | 1412.589754                                                                                            | 1109.783922 | 1163.654142 |             |           |
| 865.0336932     | 478.285076                                                                                             | 372.6600676 | 1228.675939 |             |           |
| 571.9929456     | 1.103884048                                                                                            | 1.86E-05    | 0.000497485 |             | MYBL1     |
| 8               | 66562175                                                                                               | 66614247    | -           | 7239        |           |

|                        |                                                     |             |             |             |             |                |     |
|------------------------|-----------------------------------------------------|-------------|-------------|-------------|-------------|----------------|-----|
| protein_coding         | MYB proto-oncogene like 1 [Source:HGNC              |             |             |             |             |                |     |
| Symbol;Acc:HGNC:7547]  | MYB                                                 | 1557        | 1254        | 1001        | 835         | 419            |     |
| 432                    | 10.53267587                                         | 8.208152199 | 8.603246123 |             |             |                |     |
| 6.409437877            | 3.557810451                                         | 2.774828767 |             |             |             |                |     |
| ENSG00000102760        | 150.6036604                                         | 255.7635993 | 141.8239813 |             |             |                |     |
| 250.7043758            | 784.204886                                          | 552.951628  | 182.7304136 |             |             |                |     |
| 529.2869632            | -1.53206583                                         | 1.86E-05    | 0.000497485 |             |             | RGCC           |     |
| 13                     | 41457559                                            | 41470882    | +           | 1032        |             |                |     |
| protein_coding         | regulator of cell cycle [Source:HGNC                |             |             |             |             |                |     |
| Symbol;Acc:HGNC:20369] | -                                                   | 166         | 289         | 122         | 242         | 687            |     |
| 641                    | 7.876931601                                         | 13.2691953  | 7.355072873 |             |             |                |     |
| 13.03009891            | 40.91894237                                         | 28.88080873 |             |             |             |                |     |
| ENSG00000081923        | 470.8632513                                         | 261.0735702 | 406.8720775 |             |             |                |     |
| 179.2225496            | 114.1491828                                         | 168.2146138 | 379.6029663 |             |             |                |     |
| 153.8621154            | 1.300391728                                         | 1.89E-05    | 0.000502251 |             |             | ATP8B1         |     |
| 18                     | 57646426                                            | 57803315    | -           | 7028        |             |                |     |
| protein_coding         | ATPase phospholipid transporting 8B1 [Source:HGNC   |             |             |             |             |                |     |
| Symbol;Acc:HGNC:3706]  | -                                                   | 519         | 295         | 350         | 173         | 100            |     |
| 195                    | 3.616298644                                         | 1.988917202 | 3.098440339 |             |             |                |     |
| 1.367811951            | 0.874612354                                         | 1.290131196 |             |             |             |                |     |
| ENSG00000140534        | 817.4331203                                         | 594.7167429 | 688.1950567 |             |             |                |     |
| 443.3945158            | 324.1836792                                         | 246.7147669 | 700.1149733 |             |             |                |     |
| 338.097654             | 1.05154475                                          | 1.91E-05    | 0.000508503 |             |             | TICRR          |     |
| 15                     | 89575482                                            | 89631056    | +           | 8402        |             |                |     |
| protein_coding         | TOPBP1 interacting checkpoint and replication       |             |             |             |             |                |     |
| regulator [Source:HGNC | Symbol;Acc:HGNC:28704]                              | -           | 901         | 672         |             |                |     |
| 592                    | 428                                                 | 284         | 286         | 5.251347975 | 3.789771598 |                |     |
| 4.383750982            | 2.830565021                                         | 2.077700877 | 1.582757478 |             |             |                |     |
| ENSG00000117640        | 938.0974988                                         | 961.1047363 | 926.505845  |             |             |                |     |
| 1395.449563            | 1563.843805                                         | 1438.881928 | 941.9026934 |             |             |                |     |
| 1466.058432            | -0.637937173                                        | 1.94E-05    | 0.000515776 |             |             | MTFR1L         |     |
| 1                      | 25818640                                            | 25832942    | +           | 5817        |             |                |     |
| protein_coding         | mitochondrial fission regulator 1 like [Source:HGNC |             |             |             |             |                |     |
| Symbol;Acc:HGNC:28836] | -                                                   | 1034        | 1086        | 797         | 1347        | 1370           |     |
| 1668                   | 8.70462685                                          | 8.846209133 | 8.524444827 |             |             |                |     |
| 12.86709702            | 14.4766763                                          | 13.33300373 |             |             |             |                |     |
| ENSG00000180758        | 416.4281934                                         | 399.1328141 | 476.6215765 |             |             |                |     |
| 214.4454784            | 240.8547757                                         | 163.0387796 | 430.727528  |             |             |                |     |
| 206.1130112            | 1.065350372                                         | 1.95E-05    | 0.000517651 |             |             | GPR157         |     |
| 1                      | 9100305                                             | 9129170     | -           | 5372        |             | protein_coding | G   |
| protein-coupled        | receptor 157 [Source:HGNC                           |             |             |             |             |                |     |
| Symbol;Acc:HGNC:23687] | -                                                   | 459         | 451         | 410         | 207         | 211            | 189 |
| 4.184131884            | 3.978020151                                         | 4.748480942 | 2.141146509 |             |             |                |     |
| 2.414314327            | 1.635900248                                         |             |             |             |             |                |     |
| ENSG00000179604        | 1464.303059                                         | 1307.137841 | 1889.048931 |             |             |                |     |
| 1076.371266            | 751.1016229                                         | 747.9080523 | 1553.49661  |             |             |                |     |
| 858.4603138            | 0.855241169                                         | 1.96E-05    | 0.000518555 |             |             |                |     |
| CDC42EP4               | 17                                                  | 73283624    | 73312175    | -           |             | 5007           |     |
| protein_coding         | CDC42 effector protein 4 [Source:HGNC               |             |             |             |             |                |     |
| Symbol;Acc:HGNC:17147] | -                                                   | 1614        | 1477        | 1625        | 1039        | 658            |     |

|                                                |                                                        |                 |             |                |        |
|------------------------------------------------|--------------------------------------------------------|-----------------|-------------|----------------|--------|
|                                                | 867                                                    | 15.78536479     | 13.97749497 | 20.19215264    |        |
| 11.53054937                                    |                                                        | 8.077847732     | 8.051420781 |                |        |
| ENSG00000197183                                | 392.8396683                                            |                 | 425.6826687 | 425.4719439    |        |
| 204.0857935                                    | 136.9790194                                            |                 | 229.461986  | 414.6647603    |        |
| 190.1755996                                    | 1.121259806                                            |                 | 2.01E-05    | 0.000532395    | NOL4L  |
|                                                | 20                                                     | 32443059        | 32585074    | - 9448         |        |
| protein_coding                                 | nucleolar protein 4 like [Source:HGNC                  |                 |             |                |        |
| Symbol;Acc:HGNC:16106]                         | -                                                      | 433             | 481         | 366 197        | 120    |
|                                                | 266                                                    | 2.244278223     | 2.412301754 | 2.410172059    |        |
| 1.158612968                                    | 0.780708165                                            |                 | 1.309099841 |                |        |
| ENSG00000164904                                | 1393.537484                                            |                 | 1323.067754 | 1512.401637    |        |
| 1018.35703                                     | 720.2813436                                            |                 | 736.6937447 | 1409.668958    |        |
| 825.1107062                                    | 0.77253755                                             |                 | 2.03E-05    | 0.000536386    |        |
| ALDH7A1 5                                      | 126531200                                              |                 | 126595418   | - 17970        |        |
| protein_coding                                 | aldehyde dehydrogenase 7 family member A1 [Source:HGNC |                 |             |                |        |
| Symbol;Acc:HGNC:877]                           | -                                                      | 1536            | 1495        | 1301 983       | 631    |
|                                                | 854                                                    | 4.185735892     | 3.942026653 | 4.504390834    |        |
| 3.039607339                                    | 2.158383649                                            |                 | 2.20973814  |                |        |
| ENSG00000130764                                | 2735.361662                                            |                 | 3387.761446 | 2663.26837     |        |
| 3831.011494                                    | 4785.133744                                            |                 | 6173.045008 | 2928.797159    |        |
| 4929.730082                                    | -0.751210733                                           |                 | 2.07E-05    | 0.000544583    | LRRC47 |
|                                                | 1                                                      | 3778558 3796504 | - 4516      | protein_coding |        |
| leucine rich repeat containing 47 [Source:HGNC | Symbol;Acc:HGNC:29207]                                 |                 |             |                |        |
|                                                | -                                                      | 3015 3828       | 2291 3698   | 4192 7156      |        |
| 32.69354896                                    | 40.1646916                                             |                 | 31.56298018 | 45.50142702    |        |
| 57.05775777                                    | 73.67962669                                            |                 |             |                |        |
| ENSG00000051825                                | 591.5276298                                            |                 | 435.4176153 | 468.4841349    |        |
| 250.7043758                                    | 263.6846123                                            |                 | 250.1653231 | 498.47646      |        |
| 254.8514371                                    | 0.968535134                                            |                 | 2.08E-05    | 0.000546846    |        |
| MPHOSPH9                                       | 12                                                     | 123152320       | 123244014   | -              | 10304  |
| protein_coding                                 | M-phase phosphoprotein 9 [Source:HGNC                  |                 |             |                |        |
| Symbol;Acc:HGNC:7215]                          | -                                                      | 652             | 492         | 403 242        | 231    |
|                                                | 290                                                    | 3.098635051     | 2.262484922 | 2.433358196    |        |
| 1.305033198                                    | 1.378013557                                            |                 | 1.308648965 |                |        |
| ENSG00000198853                                | 688.6034832                                            |                 | 693.8362    | 698.6574816    |        |
| 936.5155194                                    | 1292.168749                                            |                 | 1375.909277 | 693.6990549    |        |
| 1201.531182                                    | -0.792822581                                           |                 | 2.09E-05    | 0.000549103    | RUSC2  |
|                                                | 9                                                      | 35490127        | 35561898    | + 5682         |        |
| protein_coding                                 | RUN and SH3 domain containing 2 [Source:HGNC           |                 |             |                |        |
| Symbol;Acc:HGNC:23625]                         | -                                                      | 759             | 784         | 601 904        | 1132   |
|                                                | 1595                                                   | 6.54137776      | 6.537945171 | 6.580821169    |        |
| 8.840549185                                    | 12.24595214                                            |                 | 13.05240305 |                |        |
| ENSG00000138942                                | 300.3000697                                            |                 | 342.4931243 | 333.6351035    |        |
| 587.3941366                                    | 667.7727195                                            |                 | 539.1494033 | 325.4760992    |        |
| 598.1054198                                    | -0.877302717                                           |                 | 2.10E-05    | 0.000551741    | RNF185 |
|                                                | 22                                                     | 31160183        | 31207019    | + 3447         |        |
| protein_coding                                 | ring finger protein 185 [Source:HGNC                   |                 |             |                |        |
| Symbol;Acc:HGNC:26783]                         | -                                                      | 331             | 387         | 287 567        | 585    |
|                                                | 625                                                    | 4.702354797     | 5.319810011 | 5.180211121    |        |
| 9.140160441                                    | 10.43186463                                            |                 | 8.430818737 |                |        |

|                                     |                                                      |             |                |        |
|-------------------------------------|------------------------------------------------------|-------------|----------------|--------|
| ENSG00000123416                     | 15526.69303                                          | 13191.73775 | 17594.31112    |        |
| 11137.69729                         | 10185.53158                                          | 7780.141549 | 15437.58064    |        |
| 9701.123474                         | 0.670264577                                          | 2.11E-05    | 0.000552073    | TUBA1B |
| 12                                  | 49127782                                             | 49131397    | - 3574         |        |
| protein_coding                      | tubulin alpha 1b [Source:HGNC Symbol;Acc:HGNC:18809] |             |                |        |
| -                                   | 17114 14906                                          | 15135 10751 | 8923 9019      |        |
| 234.4907216                         | 197.6209622                                          | 263.472155  | 167.1499909    |        |
| 153.4630075                         | 117.3369667                                          |             |                |        |
| ENSG00000205581                     | 5138.669471                                          | 5768.398408 | 5972.882097    |        |
| 4034.061319                         | 3563.737488                                          | 3956.925301 | 5626.649992    |        |
| 3851.574702                         | 0.546586951                                          | 2.11E-05    | 0.000552758    | HMG1   |
| 21                                  | 39342315                                             | 39349647    | - 5102         |        |
| protein_coding                      | high mobility group nucleosome binding domain 1      |             |                |        |
| [Source:HGNC Symbol;Acc:HGNC:4984]  | -                                                    | 5664        | 6518           | 5138   |
| 3894                                | 3122 4587                                            | 54.36400878 | 60.53413524    |        |
| 62.65568643                         | 42.40992814                                          | 37.61315855 | 41.80414101    |        |
| ENSG00000213442                     | 1640.309746                                          | 2033.718862 | 2440.069973    |        |
| 2746.35248                          | 3717.838884                                          | 3946.573632 | 2038.03286     |        |
| 3470.254999                         | -0.768462785                                         | 2.14E-05    | 0.000558146    |        |
| RPL18AP3                            | 12 104265309                                         | 104265836   | + 528          |        |
| processed_pseudogene                | ribosomal protein L18a pseudogene 3                  |             |                |        |
| [Source:HGNC Symbol;Acc:HGNC:31387] | -                                                    | 1808        | 2298           | 2099   |
| 2651                                | 3257 4575                                            | 167.6846031 | 206.2255842    |        |
| 247.3348779                         | 278.9894938                                          | 379.1675796 | 402.8915826    |        |
| ENSG00000214866                     | 5.443505796                                          | 10.61994184 | 6.974949899    |        |
| 40.4027713                          | 79.90442797                                          | 61.24737221 | 7.679465844    |        |
| 60.5181905                          | -2.972622619                                         | 2.17E-05    | 0.000566673    | DCDC2C |
| 2                                   | 3703592 3847411                                      | + 2242      | protein_coding |        |
| doublecortin domain containing 2C   | [Source:HGNC Symbol;Acc:HGNC:32696]                  |             |                |        |
| -                                   | 6 12                                                 | 6 39        | 70 71          |        |
| 0.131052203                         | 0.253613331                                          | 0.166503163 | 0.966587206    |        |
| 1.919153852                         | 1.472494762                                          |             |                |        |
| ENSG00000146676                     | 4830.204143                                          | 4540.025136 | 4089.645624    |        |
| 6320.443787                         | 6342.128597                                          | 6768.265949 | 4486.624968    |        |
| 6476.946111                         | -0.529532706                                         | 2.24E-05    | 0.000583299    | PURB   |
| 7                                   | 44876293                                             | 44885361    | - 9069         |        |
| protein_coding                      | purine rich element binding protein B [Source:HGNC   |             |                |        |
| Symbol;Acc:HGNC:9702]               | Others                                               | 5324 5130   | 3518 6101      | 5556   |
| 7846                                | 28.74797963                                          | 26.80306157 | 24.13477641    |        |
| 37.38123683                         | 37.6573882                                           | 40.22721068 |                |        |
| ENSG00000154920                     | 465.4197455                                          | 494.7122906 | 365.0223781    |        |
| 228.9490374                         | 224.8738902                                          | 129.3958568 | 441.7181381    |        |
| 194.4062614                         | 1.188175064                                          | 2.24E-05    | 0.000583894    | EME1   |
| 17                                  | 50373220                                             | 50381483    | + 3294         |        |
| protein_coding                      | essential meiotic structure-specific endonuclease 1  |             |                |        |
| [Source:HGNC Symbol;Acc:HGNC:24965] | -                                                    | 513         | 559            | 314    |
| 221                                 | 197 150                                              | 7.626450466 | 8.041085017    |        |
| 5.930794824                         | 3.728041365                                          | 3.67612264  | 2.117379394    |        |
| ENSG00000085662                     | 4683.229486                                          | 5716.183694 | 6869.163159    |        |
| 3424.911844                         | 3800.026296                                          | 3771.457906 | 5756.192113    |        |

|                        |                                                      |             |                  |        |
|------------------------|------------------------------------------------------|-------------|------------------|--------|
| 3665.465349            | 0.650865396                                          | 2.25E-05    | 0.00058488       | AKR1B1 |
| 7                      | 134442350                                            | 134459284   | - 3660           |        |
| protein_coding         | aldo-keto reductase family 1 member B [Source:HGNC   |             |                  |        |
| Symbol;Acc:HGNC:381]   | -                                                    | 5162 6459   | 5909 3306        | 3329   |
| 4372                   | 69.0662058                                           | 83.6200918  | 100.4476432      |        |
| 50.19191981            | 55.90878701                                          | 55.54309627 |                  |        |
| ENSG00000127824        | 1231.139561                                          | 1081.464077 | 1290.365731      |        |
| 1693.808489            | 1957.658485                                          | 1991.833556 | 1200.98979       |        |
| 1881.100177            | -0.647942607                                         | 2.26E-05    | 0.000586193      | TUBA4A |
| 2                      | 219249711                                            | 219278170   | - 4079           |        |
| protein_coding         | tubulin alpha 4a [Source:HGNC Symbol;Acc:HGNC:12407] |             |                  |        |
| -                      | 1357 1222                                            | 1110 1635   | 1715 2309        |        |
| 16.29126567            | 14.19527928                                          | 16.930747   | 22.27286554      |        |
| 25.84388377            | 26.32093094                                          |             |                  |        |
| ENSG00000129173        | 489.0082707                                          | 348.6880903 | 390.5971944      |        |
| 242.4166278            | 141.5449867                                          | 134.5716911 | 409.4311851      |        |
| 172.8444352            | 1.245177861                                          | 2.28E-05    | 0.000589315      | E2F8   |
| 11                     | 19224063                                             | 19241620    | - 4140           |        |
| protein_coding         | E2F transcription factor 8 [Source:HGNC              |             |                  |        |
| Symbol;Acc:HGNC:24727] | E2F                                                  | 539 394     | 336 234          | 124    |
| 156                    | 6.375541949                                          | 4.509436975 | 5.049469844      |        |
| 3.140707994            | 1.84106323                                           | 1.752085419 |                  |        |
| ENSG00000143742        | 4958.126529                                          | 4903.758143 | 4992.901636      |        |
| 3713.947054            | 3386.806254                                          | 3225.40739  | 4951.595436      |        |
| 3442.053566            | 0.524719622                                          | 2.28E-05    | 0.000589325      | SRP9   |
| 1                      | 225777813                                            | 225790466   | + 1728           |        |
| protein_coding         | signal recognition particle 9 [Source:HGNC           |             |                  |        |
| Symbol;Acc:HGNC:11304] | -                                                    | 5465 5541   | 4295 3585        | 2967   |
| 3739                   | 154.8727863                                          | 151.939556  | 154.6415794      |        |
| 115.2809284            | 105.5409911                                          | 100.6103698 |                  |        |
| ENSG00000112893        | 603.3218924                                          | 574.3618544 | 707.9574148      |        |
| 271.4237457            | 337.8815811                                          | 383.0117361 | 628.5470538      |        |
| 330.7723543            | 0.924353004                                          | 2.29E-05    | 0.000590094      | MAN2A1 |
| 5                      | 109689366                                            | 109869625   | + 11815          |        |
| protein_coding         | mannosidase alpha class 2A member 1 [Source:HGNC     |             |                  |        |
| Symbol;Acc:HGNC:6824]  | -                                                    | 665 649     | 609 262          | 296    |
| 444                    | 2.756237282                                          | 2.602779705 | 3.206936889      |        |
| 1.232195473            | 1.53994548                                           | 1.74735144  |                  |        |
| ENSG00000122545        | 6741.781928                                          | 5953.362395 | 7770.094188      |        |
| 5157.051168            | 3752.083639                                          | 2832.043986 | 6821.74617       |        |
| 3913.726264            | 0.801700164                                          | 2.31E-05    | 0.00059513       | 7-Sep  |
| 7                      | 35800932                                             | 35907105    | + 10906          |        |
| protein_coding         | septin 7 [Source:HGNC Symbol;Acc:HGNC:1717]          |             |                  |        |
| 7431                   | 6727 6684                                            | 4978 3287   | 3283 33.36648448 | -      |
| 29.22687453            | 38.13096484                                          | 25.36304794 | 18.52599621      |        |
| 13.99704657            |                                                      |             |                  |        |
| ENSG00000145860        | 1645.753252                                          | 1498.296794 | 2349.395624      |        |
| 1085.694983            | 1060.445908                                          | 1055.870191 | 1831.148557      |        |
| 1067.337027            | 0.777926738                                          | 2.34E-05    | 0.000601667      | RNF145 |
| 5                      | 159157409                                            | 159210053   | - 4614           |        |

|                                                      |                                                      |                  |             |                 |                |        |
|------------------------------------------------------|------------------------------------------------------|------------------|-------------|-----------------|----------------|--------|
| protein_coding                                       | ring finger protein 145                              | [Source:HGNC     |             |                 |                |        |
| Symbol;Acc:HGNC:20853]                               | -                                                    | 1814             | 1693        | 2021            | 1048           | 929    |
| 1224                                                 | 19.25255515                                          | 17.38624554      |             | 27.25182365     |                |        |
| 12.62105723                                          | 12.37614771                                          | 12.33487764      |             |                 |                |        |
| ENSG00000165480                                      | 938.0974988                                          | 754.0158705      |             | 856.756346      |                |        |
| 588.4301051                                          | 281.9484816                                          | 320.0390858      |             | 849.6232384     |                |        |
| 396.8058908                                          | 1.098419058                                          | 2.34E-05         |             | 0.000601667     |                | SKA3   |
| 13                                                   | 21153595                                             | 21176602         |             | -               | 3048           |        |
| protein_coding                                       | spindle and kinetochore associated complex subunit 3 | [Source:HGNC     |             |                 |                |        |
| Symbol;Acc:HGNC:20262]                               | -                                                    | 1034             | 852         | 737             |                |        |
| 568                                                  | 247                                                  | 371              | 16.61247191 | 13.24497287     |                |        |
| 15.04386307                                          | 10.35488826                                          | 4.981146912      |             | 5.659655087     |                |        |
| ENSG00000123700                                      | 31.75378381                                          | 39.82478189      |             | 20.9248497      |                |        |
| 1.035968495                                          | 0                                                    | 0                | 30.8344718  | 0.345322832     |                |        |
| 6.419805767                                          | 2.34E-05                                             | 0.000601667      |             | KCNJ2           | 17             |        |
| 70168673                                             | 70180048                                             | +                | 5577        | protein_coding  |                |        |
| potassium voltage-gated channel subfamily J member 2 | [Source:HGNC                                         |                  |             |                 |                |        |
| Symbol;Acc:HGNC:6263]                                | -                                                    | 35               | 45          | 18              | 1              | 0      |
| 0                                                    | 0.307323721                                          | 0.382329941      |             | 0.200806935     |                |        |
| 0.009963488                                          | 0                                                    | 0                |             |                 |                |        |
| ENSG00000216775                                      | 329.3321007                                          | 246.0286526      |             | 262.7231129     |                |        |
| 98.41700702                                          | 122.1396256                                          | 31.91764468      |             | 279.3612887     |                |        |
| 84.15809244                                          | 1.738254766                                          | 2.35E-05         |             | 0.000603638     |                |        |
| AL109918.1                                           | 6                                                    | 52664366         | 52669155    | +               |                | 3821   |
| transcribed_unprocessed_pseudogene                   |                                                      |                  |             | uncharacterized |                |        |
| LOC730101                                            | [Source:NCBI                                         | gene;Acc:730101] | -           | 363             | 278            | 226    |
| 95                                                   | 107                                                  | 37               | 4.652198864 | 3.447420018     |                |        |
| 3.679918904                                          | 1.381524564                                          | 1.721290216      |             | 0.450252056     |                |        |
| ENSG00000100632                                      | 2264.498411                                          | 2793.044703      |             | 2969.003674     |                |        |
| 1666.873308                                          | 1817.25499                                           | 1686.459334      |             | 2675.515596     |                |        |
| 1723.529211                                          | 0.634311909                                          | 2.37E-05         |             | 0.000607282     |                | ERH    |
| 14                                                   | 69380123                                             | 69398627         |             | -               | 1446           |        |
| protein_coding                                       | "ERH, mRNA splicing and mitosis factor               | [Source:HGNC     |             |                 |                |        |
| Symbol;Acc:HGNC:3447]"                               | -                                                    | 2496             | 3156        | 2554            | 1609           | 1592   |
| 1955                                                 | 84.52885216                                          | 103.4177637      |             | 109.8903222     |                |        |
| 61.83007806                                          | 67.67404419                                          | 62.86508208      |             |                 |                |        |
| ENSG00000175352                                      | 880.940688                                           | 772.6007687      |             | 826.5315631     |                |        |
| 1164.428588                                          | 1342.39439                                           | 2067.745792      |             | 826.6910066     |                |        |
| 1524.856257                                          | -0.884029679                                         | 2.38E-05         |             | 0.000607282     |                | NRIP3  |
| 11                                                   | 8980576                                              | 9004049          | -           | 4123            | protein_coding |        |
| nuclear receptor interacting protein 3               | [Source:HGNC                                         |                  |             |                 |                |        |
| Symbol;Acc:HGNC:1167]                                | -                                                    | 971              | 873         | 711             | 1124           | 1176   |
| 2397                                                 | 11.53279517                                          | 10.03292001      |             | 10.72909554     |                |        |
| 15.14833916                                          | 17.53239906                                          | 27.03246923      |             |                 |                |        |
| ENSG00000001461                                      | 423.6862011                                          | 370.8129692      |             | 394.0846693     |                |        |
| 669.2356477                                          | 679.1876378                                          | 715.1277685      |             | 396.1946132     |                |        |
| 687.8503513                                          | -0.796120128                                         | 2.39E-05         |             | 0.000609078     |                | NIPAL3 |
| 1                                                    | 24415794                                             | 24472976         |             | +               | 9404           |        |
| protein_coding                                       | NIPA like domain containing 3                        | [Source:HGNC     |             |                 |                |        |
| Symbol;Acc:HGNC:25233]                               | -                                                    | 467              | 419         | 339             | 646            | 595    |

|                                      |                                                 |             |             |             |
|--------------------------------------|-------------------------------------------------|-------------|-------------|-------------|
| 829                                  | 2.431828499                                     | 2.111192544 | 2.242817439 |             |
| 3.817085968                          | 3.88912324                                      | 4.098952902 |             |             |
| ENSG00000141429                      | 1499.685847                                     | 1244.303185 | 1610.050935 |             |
| 986.2420071                          | 861.8263303                                     | 775.5125017 | 1451.346656 |             |
| 874.5269464                          | 0.730795266                                     | 2.44E-05    | 0.000621051 | GALNT1      |
| 18                                   | 35581117                                        | 35711834    | + 5126      |             |
| protein_coding                       | polypeptide N-acetylgalactosaminyltransferase 1 |             |             |             |
| [Source:HGNC Symbol;Acc:HGNC:4123]   | -                                               | 1653        | 1406        | 1385        |
| 952                                  | 755 899                                         | 15.79148366 | 12.99670196 |             |
| 16.81039886                          | 10.31977884                                     | 9.053483407 | 8.15477735  |             |
| ENSG00000122483                      | 662.2932052                                     | 440.7275863 | 320.8476954 |             |
| 236.2008168                          | 194.0536108                                     | 182.8794776 | 474.6228289 |             |
| 204.3779684                          | 1.217441322                                     | 2.45E-05    | 0.000623521 | CCDC18      |
| 1                                    | 93179919                                        | 93278730    | + 5633      |             |
| protein_coding                       | coiled-coil domain containing 18 [Source:HGNC   |             |             |             |
| Symbol;Acc:HGNC:30370]               | -                                               | 730 498     | 276 228     | 170         |
| 212                                  | 6.346171326                                     | 4.18905471  | 3.048429653 |             |
| 2.249091579                          | 1.855053889                                     | 1.749955995 |             |             |
| ENSG00000221866                      | 328.4248497                                     | 188.5039676 | 440.5843353 |             |
| 142.9636523                          | 97.02680539                                     | 108.6925197 | 319.1710509 |             |
| 116.2276591                          | 1.455179463                                     | 2.48E-05    | 0.000630646 | PLXNA4      |
| 7                                    | 132123332                                       | 132648688   | - 16372     |             |
| protein_coding                       | plexin A4 [Source:HGNC Symbol;Acc:HGNC:9102]    |             |             | -           |
| 362                                  | 213 379                                         | 138 85      | 126         | 1.082768264 |
| 0.616459157                          | 1.440271346                                     | 0.46837035  | 0.319127735 |             |
| 0.357849016                          |                                                 |             |             |             |
| ENSG00000164465                      | 1083.257653                                     | 997.3895376 | 1232.241149 |             |
| 756.2570013                          | 600.4247016                                     | 584.8692727 | 1104.296113 |             |
| 647.1836585                          | 0.770581793                                     | 2.50E-05    | 0.000635395 | DCBLD1      |
| 6                                    | 117453817                                       | 117569858   | + 6819      |             |
| protein_coding                       | "discoidin, CUB and LCCL domain containing 1    |             |             |             |
| [Source:HGNC Symbol;Acc:HGNC:21479]" | -                                               | 1194        | 1127        | 1060        |
| 730                                  | 526 678                                         | 8.574569403 | 7.83122436  |             |
| 9.671459587                          | 5.948592419                                     | 4.741463524 | 4.623171685 |             |
| ENSG00000167526                      | 50101.12009                                     | 69211.04595 | 74994.66132 |             |
| 85556.49412                          | 113704.001                                      | 114486.8662 | 64768.94245 |             |
| 104582.4538                          | -0.691283472                                    | 2.52E-05    | 0.000638212 | RPL13       |
| 16                                   | 89560657                                        | 89566828    | + 6172      |             |
| protein_coding                       | ribosomal protein L13 [Source:HGNC              |             |             |             |
| Symbol;Acc:HGNC:10303]               | -                                               | 5523 78205  | 64512 82586 | 99610       |
| 132717                               | 438.1499457                                     | 600.3922032 | 650.3115019 |             |
| 743.5198339                          | 992.0290339                                     | 999.8426465 |             |             |
| ENSG00000164761                      | 652.3134445                                     | 668.1713406 | 1024.155144 |             |
| 385.3802801                          | 408.6540745                                     | 429.5942445 | 781.5466429 |             |
| 407.8761997                          | 0.936457207                                     | 2.53E-05    | 0.000639433 |             |
| TNFRSF11B                            | 8 118923557                                     | 118952200   | -           | 2827        |
| protein_coding                       | TNF receptor superfamily member 11b             |             |             |             |
| [Source:HGNC Symbol;Acc:HGNC:11909]  | -                                               | 719         | 755         | 881         |
| 372                                  | 358 498                                         | 12.45465682 | 12.65457558 |             |
| 19.38906857                          | 7.311882016                                     | 7.784031385 | 8.190955234 |             |



|                                    |                                                                            |             |             |             |
|------------------------------------|----------------------------------------------------------------------------|-------------|-------------|-------------|
| ENSG00000100664                    | 6970.409172                                                                | 7096.776133 | 6525.065631 |             |
| 9226.335416                        | 10109.05163                                                                | 9593.408823 | 6864.083645 |             |
| 9642.931956                        | -0.490278641                                                               | 2.53E-05    | 0.000639433 | EIF5        |
| 14                                 | 103333544                                                                  | 103345025   | + 8505      |             |
| protein_coding                     | eukaryotic translation initiation factor 5                                 |             |             |             |
| [Source:HGNC Symbol;Acc:HGNC:3299] | -                                                                          | 7683        | 8019        | 5613        |
| 8906                               | 8856                                                                       | 11121       | 44.23695231 | 44.67579982 |
| 41.06081553                        | 58.18625642                                                                | 64.00452076 | 60.79957464 |             |
| ENSG00000146374                    | 34.47553671                                                                | 29.20484005 | 33.71225785 |             |
| 90.12925906                        | 120.9981338                                                                | 150.0991939 | 32.46421154 |             |
| 120.4088622                        | -1.893407944                                                               | 2.55E-05    | 0.000643804 | RSP03       |
| 6                                  | 127118604                                                                  | 127197765   | + 3179      |             |
| protein_coding                     | R-spondin 3 [Source:HGNC Symbol;Acc:HGNC:20866]                            |             |             | -           |
| 38                                 | 33                                                                         | 29          | 87          | 106         |
| 0.491869454                        | 0.567563315                                                                | 1.520690274 | 2.049569726 |             |
| 2.545011438                        |                                                                            |             |             |             |
| ENSG00000167900                    | 3031.125477                                                                | 3151.46774  | 4111.732966 |             |
| 2235.620012                        | 2163.127014                                                                | 1230.985918 | 3431.442061 |             |
| 1876.577648                        | 0.871098852                                                                | 2.59E-05    | 0.000653146 | TK1         |
| 17                                 | 78174075                                                                   | 78187233    | - 1861      |             |
| protein_coding                     | thymidine kinase 1 [Source:HGNC Symbol;Acc:HGNC:11830]                     |             |             |             |
| -                                  | 3341                                                                       | 3561        | 3537        | 2158        |
| 87.91415093                        | 90.66758359                                                                | 118.2484708 | 64.43429942 |             |
| 62.5907566                         | 35.65402939                                                                |             |             |             |
| ENSG00000163481                    | 501.7097842                                                                | 727.4660159 | 697.4949899 |             |
| 934.4435824                        | 1231.669683                                                                | 1340.541076 | 642.2235967 |             |
| 1168.88478                         | -0.864715342                                                               | 2.63E-05    | 0.000661233 | RNF25       |
| 2                                  | 218663864                                                                  | 218672411   | - 2323      |             |
| protein_coding                     | ring finger protein 25 [Source:HGNC Symbol;Acc:HGNC:14662]                 |             |             | -           |
| 1554                               | 11.65747801                                                                | 16.76675617 | 16.06974137 | 1079        |
| 21.5759224                         | 28.55088634                                                                | 31.10518744 |             |             |
| ENSG00000005893                    | 4769.418328                                                                | 3471.835986 | 5028.938877 |             |
| 3176.279405                        | 2518.130973                                                                | 1908.157568 | 4423.39773  |             |
| 2534.189315                        | 0.803769178                                                                | 2.64E-05    | 0.000662856 | LAMP2       |
| X                                  | 120427827                                                                  | 120469365   | - 5526      |             |
| protein_coding                     | lysosomal associated membrane protein 2 [Source:HGNC Symbol;Acc:HGNC:6501] |             |             | -           |
| 2212                               | 46.58603836                                                                | 33.63828675 | 48.70600187 | 2206        |
| 30.82998501                        | 24.53815965                                                                | 18.61252355 |             |             |
| ENSG00000115648                    | 1666.620025                                                                | 1749.635418 | 2322.658316 |             |
| 1390.26972                         | 833.2890346                                                                | 891.9687728 | 1912.971253 |             |
| 1038.509176                        | 0.880904348                                                                | 2.65E-05    | 0.000664615 | MLPH        |
| 2                                  | 237485428                                                                  | 237555318   | + 7514      |             |
| protein_coding                     | melanophilin [Source:HGNC Symbol;Acc:HGNC:29643]                           |             |             |             |
| -                                  | 1837                                                                       | 1977        | 1998        | 1342        |
| 11.97199837                        | 12.46699885                                                                | 16.54364262 | 9.924151117 |             |
| 5.971714405                        | 6.398532293                                                                |             |             |             |
| ENSG00000258807                    | 3.629003864                                                                | 7.079961225 | 3.48747495  |             |
| 47.65455077                        | 25.11282022                                                                | 84.53862644 | 4.73214668  |             |

|                 |                                                                      |             |             |             |        |
|-----------------|----------------------------------------------------------------------|-------------|-------------|-------------|--------|
| 52.43533247     | -3.460531141                                                         | 2.65E-05    | 0.000664615 |             |        |
| AL359237.1      | 14                                                                   | 87710419    | 87872291    | -           | 1845   |
| lincRNA         | novel transcript                                                     | -           | 4           | 8           | 3      |
| 46              | 22                                                                   | 98          | 0.106167674 | 0.205456581 |        |
| 0.101165337     | 1.385394646                                                          | 0.732948855 | 2.469793955 |             |        |
| ENSG00000126777 | 5439.876792                                                          | 3929.37848  | 4362.831162 |             |        |
| 3460.134773     | 2372.020019                                                          | 2193.691092 | 4577.362145 |             |        |
| 2675.281961     | 0.775004152                                                          | 2.67E-05    | 0.000668593 |             | KTN1   |
| 14              | 55559072                                                             | 55701526    | +           | 17575       |        |
| protein_coding  | kinectin 1 [Source:HGNC Symbol;Acc:HGNC:6467]                        |             |             |             | -      |
| 5996            | 4440                                                                 | 3753        | 3340        | 2078        | 2543   |
| 11.97054924     | 13.28587241                                                          | 10.55998197 | 7.267709669 |             |        |
| 6.727938991     |                                                                      |             |             |             |        |
| ENSG00000158480 | 458.1617378                                                          | 516.8371694 | 460.3466934 |             |        |
| 752.1131273     | 818.4496408                                                          | 862.6390453 | 478.4485335 |             |        |
| 811.0672711     | -0.761241525                                                         | 2.70E-05    | 0.000674173 |             | SPATA2 |
| 20              | 49903391                                                             | 49915508    | -           | 4270        |        |
| protein_coding  | spermatogenesis associated 2 [Source:HGNC Symbol;Acc:HGNC:14681]     |             |             |             |        |
| 1000            | 5.791515015                                                          | 6.480543243 | 5.769978003 |             | 717    |
| 9.447584595     | 10.32140075                                                          | 10.88937974 |             |             |        |
| ENSG00000008283 | 775.6995759                                                          | 746.0509141 | 762.5945223 |             |        |
| 388.4881856     | 431.483911                                                           | 496.017451  | 761.4483374 |             |        |
| 438.6631826     | 0.794587842                                                          | 2.70E-05    | 0.000674173 |             | CYB561 |
| 17              | 63432304                                                             | 63446378    | -           | 5320        |        |
| protein_coding  | cytochrome b561 [Source:HGNC Symbol;Acc:HGNC:2571]                   |             |             |             |        |
| -               | 855                                                                  | 843         | 656         | 375         | 378    |
| 7.87015283      | 7.508313248                                                          | 7.671831465 | 3.916802552 |             |        |
| 4.367445837     | 5.025592032                                                          |             |             |             |        |
| ENSG00000234883 | 312.0943323                                                          | 358.423037  | 213.8984636 |             |        |
| 473.4376022     | 660.9237685                                                          | 722.0288809 | 294.8052776 |             |        |
| 618.7967505     | -1.067527286                                                         | 2.73E-05    | 0.000680545 |             |        |
| MIR155HG        | 21                                                                   | 25561909    | 25575168    | +           | 1600   |
| lincRNA         | MIR155 host gene [Source:HGNC Symbol;Acc:HGNC:35460]                 |             |             |             |        |
| -               | 344                                                                  | 405         | 184         | 457         | 579    |
| 10.52851556     | 11.99392921                                                          | 7.154918431 | 15.87114506 |             |        |
| 22.24364428     | 24.32408394                                                          |             |             |             |        |
| ENSG00000117054 | 1319.142905                                                          | 1143.413738 | 1256.653474 |             |        |
| 854.6740083     | 732.8377537                                                          | 709.0892952 | 1239.736705 |             |        |
| 765.5336857     | 0.695655885                                                          | 2.75E-05    | 0.000683998 |             | ACADM  |
| 1               | 75724347                                                             | 75787575    | +           | 4783        |        |
| protein_coding  | acyl-CoA dehydrogenase medium chain [Source:HGNC Symbol;Acc:HGNC:89] |             |             |             |        |
| 822             | 14.88650368                                                          | 12.79936941 | 14.06151646 |             | 642    |
| 9.584415025     | 8.250533032                                                          | 7.991024364 |             |             |        |
| ENSG00000133142 | 960.778773                                                           | 1055.799218 | 1143.891783 |             |        |
| 663.0198367     | 482.8510433                                                          | 671.9958163 | 1053.489925 |             |        |
| 605.9555654     | 0.796298959                                                          | 2.85E-05    | 0.000706891 |             | TCEAL4 |
| X               | 103576231                                                            | 103587736   | +           | 2518        |        |
| protein_coding  | transcription elongation factor A like 4 [Source:HGNC                |             |             |             |        |

|                         |                                      |              |                        |             |                |        |
|-------------------------|--------------------------------------|--------------|------------------------|-------------|----------------|--------|
| Symbol;Acc:HGNC:26121]  | -                                    | 1059         | 1193                   | 984         | 640            | 423    |
| 779                     | 20.59533772                          | 22.44973189  |                        | 24.31342935 |                |        |
| 14.1233035              | 10.32599717                          | 14.38509552  |                        |             |                |        |
| ENSG00000174276         | 356.5496296                          | 619.4966072  |                        | 365.0223781 |                |        |
| 807.0194575             | 755.6675903                          | 1339.678437  |                        | 447.0228716 |                |        |
| 967.4551617             | -1.113580731                         | 2.89E-05     |                        | 0.000716145 |                | ZNHIT2 |
| 11                      | 65116403                             | 65117708     |                        | -           | 1306           |        |
| protein_coding          | zinc finger HIT-type containing      | 2            | [Source:HGNC           |             |                |        |
| Symbol;Acc:HGNC:1177]   | -                                    | 393          | 700                    | 314         | 779            | 662    |
| 1553                    | 14.73594721                          | 25.39693479  |                        | 14.95868158 |                |        |
| 33.14410716             | 31.15746908                          | 55.29161775  |                        |             |                |        |
| ENSG00000116171         | 1496.056843                          | 1350.502604  |                        | 1679.800434 |                |        |
| 967.5945742             | 989.673415                           | 907.4962756  |                        | 1508.786627 |                |        |
| 954.9214216             | 0.659720825                          | 2.92E-05     |                        | 0.000722226 |                | SCP2   |
| 1                       | 52927229                             | 53051703     |                        | +           | 8305           |        |
| protein_coding          | sterol carrier protein 2             | [Source:HGNC |                        |             |                |        |
| Symbol;Acc:HGNC:10606]  | -                                    | 1649         | 1526                   | 1445        | 934            | 867    |
| 1052                    | 9.723210823                          | 8.706454559  |                        | 10.82517827 |                |        |
| 6.249126025             | 6.416922895                          | 5.889889148  |                        |             |                |        |
| ENSG00000162852         | 1056.947375                          | 1015.089441  |                        | 1027.642619 |                |        |
| 1511.478034             | 1714.520726                          | 1532.909583  |                        | 1033.226478 |                |        |
| 1586.302781             | -0.618204695                         | 2.93E-05     |                        | 0.000723718 |                | CNST   |
| 1                       | 246566444                            | 246668584    |                        | +           | 5922           |        |
| protein_coding          | "consortin, connexin sorting protein | [Source:HGNC |                        |             |                |        |
| Symbol;Acc:HGNC:26486]" | -                                    | 1165         | 1147                   | 884         | 1459           | 1502   |
| 1777                    | 9.633546674                          | 9.177437925  |                        | 9.287326392 |                |        |
| 13.68985766             | 15.5900996                           | 13.95243612  |                        |             |                |        |
| ENSG00000164161         | 111.5918688                          | 29.20484005  |                        | 82.53690714 |                |        |
| 9.323716454             | 10.27342645                          | 0            | 74.44453867            | 6.532380969 |                |        |
|                         | 3.540441302                          | 2.93E-05     | 0.000723718            | HHIP        | 4              |        |
|                         | 144646021                            | 144745271    | +                      | 12074       | protein_coding |        |
|                         | hedgehog interacting protein         | [Source:HGNC |                        |             |                |        |
| Symbol;Acc:HGNC:14866]  | -                                    | 123          | 33                     | 71          | 9              | 9      |
| 0                       | 0.498864527                          | 0.129505797  |                        | 0.365859237 |                |        |
| 0.04141936              | 0.045818271                          | 0            |                        |             |                |        |
| ENSG00000065183         | 5485.23934                           | 5632.99415   |                        | 4688.328824 |                |        |
| 7648.555398             | 7584.071706                          | 7473.042049  |                        | 5268.854105 |                |        |
| 7568.556384             | -0.522275909                         | 2.93E-05     |                        | 0.000723718 |                | WDR3   |
| 1                       | 117929720                            | 117966542    |                        | +           | 10275          |        |
| protein_coding          | WD repeat domain 3                   | [Source:HGNC | Symbol;Acc:HGNC:12755] |             |                |        |
| -                       | 6046                                 | 6365         | 4033                   | 7383        | 6644           | 8663   |
| 28.81475928             | 29.35235952                          | 24.42042613  |                        | 39.92666919 |                |        |
| 39.74615789             | 39.20283746                          |              |                        |             |                |        |
| ENSG00000072864         | 840.1143945                          | 685.8712437  |                        | 971.8430193 |                |        |
| 500.372783              | 477.1435842                          | 419.242576   |                        | 832.6095525 |                |        |
| 465.5863144             | 0.838350166                          | 2.94E-05     |                        | 0.000724003 |                | NDE1   |
| 16                      | 15643267                             | 15726353     |                        | +           | 5512           |        |
| protein_coding          | nudE neurodevelopment protein 1      | [Source:HGNC |                        |             |                |        |
| Symbol;Acc:HGNC:17619]  | -                                    | 926          | 775                    | 836         | 483            | 418    |
| 486                     | 8.226790944                          | 6.662219456  |                        | 9.436347271 |                |        |

|                                                |                                                                            |             |             |             |                |
|------------------------------------------------|----------------------------------------------------------------------------|-------------|-------------|-------------|----------------|
| 4.869114255                                    | 4.661379191                                                                | 4.099756645 |             |             |                |
| ENSG00000171658                                | 4.53625483                                                                 | 5.309970919 | 3.48747495  |             |                |
| 35.22292883                                    | 38.81072216                                                                | 66.42320649 | 4.444566899 |             |                |
| 46.81895249                                    | -3.388746975                                                               | 3.01E-05    | 0.000739546 |             |                |
| NMRAL2P 3                                      | 185959943                                                                  | 185980872   | +           | 2628        |                |
| transcribed_unprocessed_pseudogene             | "NmrA like redox sensor 2, pseudogene [Source:HGNC Symbol;Acc:HGNC:52332]" |             |             |             |                |
|                                                | 3                                                                          | 34          | 34          | 77          | 0.093169406    |
|                                                | 0.07102361                                                                 | 0.718895226 | 0.795244943 | 0.108181333 | 1.362374112    |
| ENSG00000148773                                | 8504.570555                                                                | 5434.755235 | 7228.373079 |             |                |
| 3087.186115                                    | 1662.012102                                                                | 1280.156343 | 7055.899623 |             |                |
| 2009.784853                                    | 1.811860275                                                                | 3.04E-05    | 0.000745851 | MKI67       |                |
| 10                                             | 128096659                                                                  | 128126385   | -           | 12807       |                |
| protein_coding                                 | marker of proliferation Ki-67 [Source:HGNC Symbol;Acc:HGNC:7107]           |             |             |             |                |
|                                                | -                                                                          | 9374        | 6141        | 6218        | 2980           |
|                                                | 1484                                                                       | 35.84315441 | 22.72051278 | 30.207178   | 1456           |
| 12.92947522                                    | 6.988135633                                                                | 5.387874977 |             |             |                |
| ENSG00000156509                                | 121.5716294                                                                | 115.9343651 | 105.7867401 |             |                |
| 33.15099184                                    | 36.5277385                                                                 | 25.01653231 | 114.4309115 |             |                |
| 31.56508755                                    | 1.863886113                                                                | 3.12E-05    | 0.00076579  | FBX043      |                |
| 8                                              | 100133360                                                                  | 100145800   | -           | 3950        |                |
| protein_coding                                 | F-box protein 43 [Source:HGNC Symbol;Acc:HGNC:28521]                       |             |             |             |                |
|                                                | -                                                                          | 134         | 131         | 91          | 32             |
|                                                | 1.661255326                                                                | 1.571450266 | 1.433346345 | 0.450157952 |                |
| 0.497966633                                    | 0.341375163                                                                |             |             |             |                |
| ENSG00000130508                                | 1789.098905                                                                | 1189.433486 | 2613.281229 |             |                |
| 580.1423571                                    | 485.134027                                                                 | 219.1103175 | 1863.937873 |             |                |
| 428.1289005                                    | 2.122670969                                                                | 3.16E-05    | 0.000773361 | PXDN        |                |
| 2                                              | 1631887                                                                    | 1744852     | -           | 11257       | protein_coding |
| peroxidase [Source:HGNC Symbol;Acc:HGNC:14966] | -                                                                          |             |             | 1972        | 1344           |
|                                                | 2248                                                                       | 560         | 425         | 254         | 8.578531061    |
|                                                | 12.42454483                                                                | 2.764250549 | 2.320671262 | 5.657219679 | 1.049160832    |
| ENSG00000124795                                | 5883.522514                                                                | 4919.688056 | 5197.500167 |             |                |
| 4216.391774                                    | 2703.052649                                                                | 2640.538118 | 5333.570246 |             |                |
| 3186.660847                                    | 0.743164836                                                                | 3.17E-05    | 0.000775752 | DEK         |                |
| 6                                              | 18223868                                                                   | 18264823    | -           | 4361        |                |
| protein_coding                                 | DEK proto-oncogene [Source:HGNC Symbol;Acc:HGNC:2768]                      |             |             |             |                |
|                                                | -                                                                          | 6485        | 5559        | 4471        | 4070           |
|                                                | 72.82031903                                                                | 60.40001246 | 63.786009   | 2368        | 3061           |
|                                                | 33.37666745                                                                | 32.63685192 |             | 51.85854961 |                |
| ENSG00000169855                                | 1813.594681                                                                | 1354.042584 | 1889.048931 |             |                |
| 1165.464557                                    | 952.0041847                                                                | 763.4355551 | 1685.562065 |             |                |
| 960.3014322                                    | 0.811931205                                                                | 3.22E-05    | 0.000787186 | ROB01       |                |
| 3                                              | 78597240                                                                   | 79767815    | -           | 10875       |                |
| protein_coding                                 | roundabout guidance receptor 1 [Source:HGNC Symbol;Acc:HGNC:10249]         |             |             |             |                |
|                                                | -                                                                          | 1999        | 1530        | 1625        | 1125           |
|                                                | 885                                                                        | 9.001444581 | 6.666357591 | 9.296745587 | 834            |
| 5.7482454                                      | 4.713941029                                                                | 3.783946812 |             |             |                |
| ENSG00000129038                                | 2848.768033                                                                | 2927.563967 | 4104.758016 |             |                |
| 2050.181651                                    | 2236.182491                                                                | 1647.640576 | 3293.696672 |             |                |

|                                |                                                      |             |                |       |
|--------------------------------|------------------------------------------------------|-------------|----------------|-------|
| 1978.001573                    | 0.735698286                                          | 3.23E-05    | 0.000787889    | LOXL1 |
| 15                             | 73925989                                             | 73952137    | + 3637         |       |
| protein_coding                 | lysyl oxidase like 1 [Source:HGNC                    |             |                |       |
| Symbol;Acc:HGNC:6665]          | -                                                    | 3140 3308   | 3531 1979      | 1959  |
| 1910                           | 42.27805803                                          | 43.09715886 | 60.40338305    |       |
| 30.23531773                    | 33.108423                                            | 24.41861819 |                |       |
| ENSG00000105825                | 424.5934521                                          | 436.3026105 | 402.2221109    |       |
| 546.9913653                    | 901.7785443                                          | 1078.298807 | 421.0393911    |       |
| 842.3562387                    | -1.00071947                                          | 3.26E-05    | 0.000793583    | TFPI2 |
| 7                              | 93885396                                             | 93890991    | - 2682         |       |
| protein_coding                 | tissue factor pathway inhibitor 2 [Source:HGNC       |             |                |       |
| Symbol;Acc:HGNC:11761]         | -                                                    | 468 493     | 346 528        | 790   |
| 1250                           | 8.545072722                                          | 8.709928434 | 8.026462332    |       |
| 10.93924106                    | 18.10571492                                          | 21.67116494 |                |       |
| ENSG00000163932                | 598.7856375                                          | 566.396898  | 791.6568136    |       |
| 382.2723746                    | 355.0039586                                          | 241.5389327 | 652.279783     |       |
| 326.2717553                    | 1.000279002                                          | 3.27E-05    | 0.000796117    | PRKCD |
| 3                              | 53156009                                             | 53192717    | + 3396         |       |
| protein_coding                 | protein kinase C delta [Source:HGNC                  |             |                |       |
| Symbol;Acc:HGNC:9399]          | -                                                    | 660 640     | 681 369        | 311   |
| 280                            | 9.517106681                                          | 8.929738338 | 12.47631344    |       |
| 6.037688852                    | 5.629114306                                          | 3.833728628 |                |       |
| ENSG00000171135                | 909.0654679                                          | 1400.062332 | 970.6805277    |       |
| 1571.564207                    | 2012.450093                                          | 2191.103175 | 1093.269443    |       |
| 1925.039158                    | -0.815866407                                         | 3.29E-05    | 0.000798388    | JAGN1 |
| 3                              | 9890572 9894349                                      | + 1781      | protein_coding |       |
| jagunal homolog 1 [Source:HGNC | Symbol;Acc:HGNC:26926]                               | -           |                | 1002  |
| 1582                           | 835 1517                                             | 1763 2540   | 27.55069035    |       |
| 42.0890381                     | 29.16952806                                          | 47.32969491 | 60.84652118    |       |
| 66.31332668                    |                                                      |             |                |       |
| ENSG00000150403                | 1389.001229                                          | 1266.428064 | 1710.025217    |       |
| 882.6451577                    | 965.7020866                                          | 798.8037559 | 1455.151503    |       |
| 882.3836667                    | 0.721616797                                          | 3.30E-05    | 0.000799764    | TMC03 |
| 13                             | 113490995                                            | 113554590   | + 10407        |       |
| protein_coding                 | transmembrane and coiled-coil domains 3 [Source:HGNC |             |                |       |
| Symbol;Acc:HGNC:20329]         | -                                                    | 1531 1431   | 1471 852       | 846   |
| 926                            | 7.204076562                                          | 6.515391546 | 8.794151939    |       |
| 4.549106286                    | 4.996802322                                          | 4.137294637 |                |       |
| ENSG00000133835                | 1536.883136                                          | 1217.753331 | 1397.314963    |       |
| 993.4937866                    | 740.8281965                                          | 673.7210944 | 1383.98381     |       |
| 802.6810258                    | 0.786315599                                          | 3.32E-05    | 0.000805397    |       |
| HSD17B4 5                      | 119452443                                            | 119637199   | + 10664        |       |
| protein_coding                 | hydroxysteroid 17-beta dehydrogenase 4 [Source:HGNC  |             |                |       |
| Symbol;Acc:HGNC:5213]          | -                                                    | 1694 1376   | 1202 959       | 649   |
| 781                            | 7.77896743                                           | 6.113990201 | 7.012795552    |       |
| 4.997013404                    | 3.740864009                                          | 3.405351259 |                |       |
| ENSG00000142856                | 954.4280162                                          | 809.7705651 | 848.6189044    |       |
| 550.0992708                    | 533.0766838                                          | 470.1382797 | 870.9391619    |       |
| 517.7714114                    | 0.751116309                                          | 3.33E-05    | 0.000805574    |       |
| ITGB3BP 1                      | 63440770                                             | 63593721    | - 5459         |       |

|                        |                                                      |             |       |             |       |             |
|------------------------|------------------------------------------------------|-------------|-------|-------------|-------|-------------|
| protein_coding         | integrin subunit beta 3 binding protein [Source:HGNC |             |       |             |       |             |
| Symbol;Acc:HGNC:6157]  | -                                                    | 1052        | 915   | 730         | 531   | 467         |
| 545                    | 9.436942939                                          | 7.942083351 |       | 8.31987138  |       |             |
| 5.404972273            | 5.258370059                                          | 4.642099298 |       |             |       |             |
| ENSG00000140937        | 280.3405485                                          | 131.8642778 |       | 219.7109218 |       |             |
| 97.38103852            | 35.38624667                                          | 27.60444945 |       | 210.6385827 |       |             |
| 53.45724488            | 1.980652748                                          | 3.39E-05    |       | 0.000820037 |       | CDH11       |
| 16                     | 64943753                                             | 65126112    |       | -           | 13381 |             |
| protein_coding         | cadherin 11 [Source:HGNC                             |             |       |             |       |             |
| Symbol;Acc:HGNC:1750]  | -                                                    |             |       |             |       |             |
| 309                    | 149                                                  | 189         | 94    | 31          | 32    | 1.130833309 |
| 0.52762351             | 0.87877983                                           | 0.390347432 |       | 0.142403441 |       |             |
| 0.111196835            |                                                      |             |       |             |       |             |
| ENSG00000205542        | 20069.29862                                          | 23058.54871 |       | 28245.05962 |       |             |
| 17515.11934            | 13826.89051                                          | 15098.77121 |       | 23790.96898 |       |             |
| 15480.26036            | 0.619909906                                          | 3.42E-05    |       | 0.000825766 |       | TMSB4X      |
| X                      | 12975108                                             | 12977227    |       | +           | 1705  |             |
| protein_coding         | thymosin beta 4 X-linked [Source:HGNC                |             |       |             |       |             |
| Symbol;Acc:HGNC:11881] | -                                                    | 22121       | 26055 | 24297       | 16907 | 12113       |
| 17503                  | 635.34418                                            | 724.0909758 |       | 886.6150866 |       |             |
| 551.0033166            | 436.6914552                                          | 477.3304365 |       |             |       |             |
| ENSG00000162627        | 1220.252549                                          | 1192.973466 |       | 1803.024549 |       |             |
| 901.2925906            | 794.4783124                                          | 650.4298401 |       | 1405.416855 |       |             |
| 782.0669144            | 0.845393979                                          | 3.44E-05    |       | 0.00082875  |       | SNX7        |
| 1                      | 98661701                                             | 98760500    |       | +           | 2067  |             |
| protein_coding         | sorting nexin 7 [Source:HGNC                         |             |       |             |       |             |
| Symbol;Acc:HGNC:14971] | -                                                    | 1345        | 1348  | 1551        | 870   | 696         |
| 31.86474822            | 30.90123639                                          | 46.6850865  |       | 23.387878   |       |             |
| 20.69741574            | 16.96140747                                          |             |       |             |       |             |
| ENSG00000074410        | 2651.894574                                          | 3166.512658 |       | 3857.147294 |       |             |
| 5071.065783            | 5871.833964                                          | 4499.52526  |       | 3225.184842 |       |             |
| 5147.475002            | -0.674694518                                         | 3.52E-05    |       | 0.000847415 |       | CA12        |
| 15                     | 63321378                                             | 63382161    |       | -           | 7313  |             |
| protein_coding         | carbonic anhydrase 12 [Source:HGNC                   |             |       |             |       |             |
| Symbol;Acc:HGNC:1371]  | -                                                    | 2923        | 3578  | 3318        | 4895  | 5144        |
| 5216                   | 19.57320413                                          | 23.18308372 |       | 28.22849048 |       |             |
| 37.19368138            | 43.23672063                                          | 33.16446742 |       |             |       |             |
| ENSG00000100162        | 479.935761                                           | 492.9423003 |       | 474.2965932 |       |             |
| 287.9992416            | 255.6941695                                          | 223.4235127 |       | 482.3915515 |       |             |
| 255.7056413            | 0.917004959                                          | 3.54E-05    |       | 0.000851838 |       | CENPM       |
| 22                     | 41938721                                             | 41947164    |       | -           | 1778  |             |
| protein_coding         | centromere protein M [Source:HGNC                    |             |       |             |       |             |
| Symbol;Acc:HGNC:18352] | -                                                    | 529         | 557   | 408         | 278   | 224         |
| 259                    | 14.56976674                                          | 14.84396355 |       | 14.2769439  |       |             |
| 8.68810544             | 7.743969288                                          | 6.773279943 |       |             |       |             |
| ENSG00000005022        | 10933.28139                                          | 10302.22858 |       | 12699.05878 |       |             |
| 8457.646792            | 7642.28779                                           | 7132.299626 |       | 11311.52292 |       |             |
| 7744.078069            | 0.546575788                                          | 3.55E-05    |       | 0.000853222 |       |             |
| SLC25A5 X              | 119468400                                            | 119471319   |       | +           | 1500  |             |
| protein_coding         | solute carrier family 25 member 5 [Source:HGNC       |             |       |             |       |             |
| Symbol;Acc:HGNC:10991] | -                                                    | 12051       | 11641 | 10924       | 8164  | 6695        |

|                |                                                    |              |             |             |             |
|----------------|----------------------------------------------------|--------------|-------------|-------------|-------------|
|                | 8268                                               | 393.4236932  | 367.7269596 | 453.1033561 |             |
|                | 302.4292418                                        | 274.3510853  | 256.2950551 |             |             |
|                | ENSG00000178913                                    | 2038.592921  | 1993.009085 | 2231.983968 |             |
|                | 2740.136669                                        | 3470.135158  | 3241.797532 | 2087.861991 |             |
|                | 3150.689786                                        | -0.593869659 | 3.57E-05    | 0.00085508  | TAF7        |
|                | 5                                                  | 141260225    | 141320821   | - 2723      |             |
| protein_coding | TATA-box binding protein associated factor 7       |              |             |             |             |
|                | [Source:HGNC Symbol;Acc:HGNC:11541]                |              |             |             |             |
|                | 2645                                               | 3040         | 3758        | 40.40955935 | 39.18746639 |
|                | 43.86927266                                        | 53.97468031  | 68.62356919 | 64.1711988  |             |
|                | ENSG00000214160                                    | 1685.672295  | 1900.084594 | 1587.963594 |             |
|                | 2497.720041                                        | 2501.008596  | 2753.543833 | 1724.573494 |             |
|                | 2584.090823                                        | -0.583177365 | 3.58E-05    | 0.00085508  | ALG3        |
|                | 3                                                  | 184242301    | 184249548   | - 3464      |             |
| protein_coding | "ALG3, alpha-1,3- mannosyltransferase [Source:HGNC |              |             |             |             |
|                | Symbol;Acc:HGNC:23056]"                            |              |             |             |             |
|                | 3192                                               | 26.26615543  | 29.36842132 | 24.53463846 | 1920        |
|                | 38.67509335                                        | 38.8787107   | 42.8465657  |             |             |
|                | ENSG00000143499                                    | 1134.063707  | 1077.039101 | 1016.017702 |             |
|                | 764.5447492                                        | 575.3118814  | 568.4791308 | 1075.706837 |             |
|                | 636.1119205                                        | 0.758460192  | 3.58E-05    | 0.00085508  | SMYD2       |
|                | 1                                                  | 214281102    | 214337131   | + 4889      |             |
| protein_coding | SET and MYND domain containing 2 [Source:HGNC      |              |             |             |             |
|                | Symbol;Acc:HGNC:20982]                             |              |             |             |             |
|                | 659                                                | 12.52041313  | 11.79497383 | 11.12239314 | 504         |
|                | 8.387805826                                        | 6.336622854  | 6.267529625 |             |             |
|                | ENSG00000131408                                    | 1976.899855  | 2703.660193 | 2347.070641 |             |
|                | 3009.488478                                        | 4179.001583  | 4335.623842 | 2342.543563 |             |
|                | 3841.371301                                        | -0.713594073 | 3.58E-05    | 0.00085508  | NR1H2       |
|                | 19                                                 | 50329653     | 50382982    | + 3753      |             |
| protein_coding | nuclear receptor subfamily 1 group H member 2      |              |             |             |             |
|                | [Source:HGNC Symbol;Acc:HGNC:7965]                 |              |             |             |             |
|                | 2019                                               | 2905         | 3661        | 5026        | 28.431996   |
|                | 33.47068504                                        | 43.01100753  | 59.96095271 | 62.26943683 | 3055        |
|                | ENSG00000182446                                    | 5103.286684  | 5242.711287 | 4637.179191 |             |
|                | 6254.141804                                        | 7838.624384  | 8411.59333  | 4994.392387 |             |
|                | 7501.453173                                        | -0.586805316 | 3.59E-05    | 0.00085508  | NPL0C4      |
|                | 17                                                 | 81556887     | 81648465    | - 9574      |             |
| protein_coding | "NPL4 homolog, ubiquitin recognition factor        |              |             |             |             |
|                | [Source:HGNC Symbol;Acc:HGNC:18261]"               |              |             |             |             |
|                | 6037                                               | 6867         | 9751        | 28.77118749 | 29.31892669 |
|                | 25.92253442                                        | 35.03803938  | 44.08805953 | 47.35728011 |             |
|                | ENSG00000166965                                    | 578.8261163  | 707.1111273 | 782.3568804 |             |
|                | 420.6032089                                        | 373.2678278  | 350.2314524 | 689.4313747 |             |
|                | 381.3674964                                        | 0.853931851  | 3.61E-05    | 0.000859684 | RCCD1       |
|                | 15                                                 | 90954870     | 90963125    | + 4969      |             |
| protein_coding | RCC1 domain containing 1 [Source:HGNC              |              |             |             |             |
|                | Symbol;Acc:HGNC:30457]                             |              |             |             |             |
|                | 406                                                | 6.287534275  | 7.619109644 | 8.426610382 | 327         |
|                | 4.54013828                                         | 4.045070695  | 3.799164119 |             |             |

|                                     |                                                |             |             |             |             |
|-------------------------------------|------------------------------------------------|-------------|-------------|-------------|-------------|
| ENSG00000122565                     | 7286.132508                                    | 6954.291913 | 6758.726452 |             |             |
| 5496.848834                         | 4478.072442                                    | 4188.112565 | 6999.716958 |             |             |
| 4721.01128                          | 0.568349707                                    | 3.63E-05    | 0.000862405 | CBX3        |             |
| 7                                   | 26201162                                       | 26213356    | + 4641      |             |             |
| protein_coding                      | chromobox 3 [Source:HGNC Symbol;Acc:HGNC:1553] |             |             | -           |             |
| 8031                                | 7858                                           | 5814        | 5306        | 3923        | 4855        |
| 80.22817199                         |                                                | 77.94177746 | 63.52837124 | 84.73966466 | 51.95820031 |
| 48.64169318                         |                                                |             |             |             |             |
| ENSG00000136270                     | 2555.725971                                    | 3244.392231 | 2677.21827  |             |             |
| 3795.788565                         | 4478.072442                                    | 4653.937649 | 2825.778824 |             |             |
| 4309.266219                         | -0.608682852                                   | 3.64E-05    | 0.000864554 | TBRG4       |             |
| 7                                   | 45100100                                       | 45112047    | - 5803      |             |             |
| protein_coding                      | transforming growth factor beta regulator 4    |             |             |             |             |
| [Source:HGNC Symbol;Acc:HGNC:17443] |                                                |             | -           | 2817        | 3666        |
| 3664                                | 3923                                           | 5395        | 23.77184884 | 29.93410867 | 2303        |
| 24.69154207                         | 35.08447144                                    | 41.5540251  | 43.22847318 |             |             |
| ENSG00000149273                     | 25603.52951                                    | 35628.13487 | 35733.83083 |             |             |
| 42832.11742                         | 51934.45371                                    | 56534.77511 | 32321.83174 |             |             |
| 50433.78208                         | -0.641912398                                   | 3.69E-05    | 0.000875326 | RPS3        |             |
| 11                                  | 75399486                                       | 75422280    | + 5894      |             |             |
| protein_coding                      | ribosomal protein S3 [Source:HGNC              |             |             |             |             |
| Symbol;Acc:HGNC:10420]              |                                                |             | -           | 28221       | 40258       |
| 65537                               | 234.47198                                      | 323.644704  | 30739       | 41345       | 45497       |
| 389.7848081                         | 474.4822709                                    | 517.0201198 | 324.4788918 |             |             |
| ENSG00000150556                     | 126.1078843                                    | 130.0942875 | 172.0487642 |             |             |
| 25.89921237                         | 61.64055872                                    | 21.56597613 | 142.750312  |             |             |
| 36.36858241                         | 1.982396574                                    | 3.72E-05    | 0.000881357 | LYPD6B      |             |
| 2                                   | 149038107                                      | 149215262   | + 3771      |             |             |
| protein_coding                      | LY6/PLAUR domain containing 6B [Source:HGNC    |             |             |             |             |
| Symbol;Acc:HGNC:27018]              |                                                |             | -           | 139         | 147         |
| 25                                  | 1.805040503                                    | 1.847086538 | 148         | 25          | 54          |
| 0.368379556                         | 0.880206533                                    | 0.308258098 | 2.441810909 |             |             |
| ENSG00000138092                     | 712.1920083                                    | 645.1614666 | 684.7075818 |             |             |
| 402.9917445                         | 424.6349601                                    | 334.7039496 | 680.6870189 |             |             |
| 387.4435514                         | 0.814403099                                    | 3.74E-05    | 0.000883507 | CENPO       |             |
| 2                                   | 24793136                                       | 24822376    | + 5518      |             |             |
| protein_coding                      | centromere protein 0 [Source:HGNC              |             |             |             |             |
| Symbol;Acc:HGNC:28152]              |                                                |             | -           | 785         | 729         |
| 388                                 | 6.966532125                                    | 6.259970304 | 589         | 389         | 372         |
| 3.91723791                          | 4.143893678                                    | 3.269497786 | 6.641106506 |             |             |
| ENSG00000067955                     | 3852.187602                                    | 3907.253601 | 4173.345023 |             |             |
| 2829.22996                          | 2794.371995                                    | 2780.285643 | 3977.595409 |             |             |
| 2801.295866                         | 0.505673665                                    | 3.76E-05    | 0.000887476 | CBFB        |             |
| 16                                  | 67029116                                       | 67101058    | + 4129      |             |             |
| protein_coding                      | core-binding factor subunit beta [Source:HGNC  |             |             |             |             |
| Symbol;Acc:HGNC:1539]               | CBF                                            | 4246        | 4415        | 3590        | 2731        |
| 3223                                | 50.35745699                                    | 50.66549218 | 54.09491121 | 2448        |             |
| 36.75266711                         | 36.44298068                                    | 36.29496992 |             |             |             |
| ENSG00000196449                     | 918.1379776                                    | 1157.57366  | 995.0928523 |             |             |
| 1652.369749                         | 1656.304643                                    | 1512.206246 | 1023.601497 |             |             |



|                                     |                                                        |             |             |       |
|-------------------------------------|--------------------------------------------------------|-------------|-------------|-------|
| 1606.960213                         | -0.650193501                                           | 3.79E-05    | 0.000893116 | YRDC  |
| 1                                   | 37802944                                               | 37808185    | - 1826      |       |
| protein_coding                      | yrDC N6-threonylcarbamoyltransferase domain containing |             |             |       |
| [Source:HGNC Symbol;Acc:HGNC:28905] | -                                                      | 1012        | 1308        | 856   |
| 1595                                | 1451 1753                                              | 27.13991123 | 33.94168602 |       |
| 29.16619923                         | 48.53689138                                            | 48.84431231 | 44.63876401 |       |
| ENSG00000227051                     | 966.2222788                                            | 896.5000901 | 1246.191049 |       |
| 643.3364353                         | 626.6790137                                            | 520.1713443 | 1036.304473 |       |
| 596.7289311                         | 0.796163483                                            | 3.83E-05    | 0.000901391 |       |
| C14orf132                           | 14 96039324                                            | 96093889    | +           | 7775  |
| protein_coding                      | chromosome 14 open reading frame 132                   |             |             |       |
| [Source:HGNC Symbol;Acc:HGNC:20346] | -                                                      | 1065        | 1013        | 1072  |
| 621                                 | 549 603                                                | 6.707765842 | 6.173557372 |       |
| 8.578300078                         | 4.438162976                                            | 4.340295584 | 3.606184419 |       |
| ENSG00000166670                     | 53.52780699                                            | 40.70977704 | 39.5247161  |       |
| 290.0711786                         | 141.5449867                                            | 86.26390453 | 44.58743338 |       |
| 172.6266899                         | -1.950019127                                           | 3.83E-05    | 0.000901901 | MMP10 |
| 11                                  | 102770503                                              | 102780628   | - 1758      |       |
| protein_coding                      | matrix metalloproteinase 10 [Source:HGNC               |             |             |       |
| Symbol;Acc:HGNC:7156]               | -                                                      | 59 46       | 34 280      | 124   |
| 100                                 | 1.643470165                                            | 1.23983931  | 1.203280539 |       |
| 8.85016167                          | 4.335609654                                            | 2.644917605 |             |       |
| ENSG00000142798                     | 1429.827522                                            | 1272.62303  | 2122.709753 |       |
| 932.3716454                         | 999.9468415                                            | 692.6991534 | 1608.386768 |       |
| 875.0058801                         | 0.878309732                                            | 3.85E-05    | 0.000904528 | HSPG2 |
| 1                                   | 21822245                                               | 21937297    | - 18104     |       |
| protein_coding                      | heparan sulfate proteoglycan 2 [Source:HGNC            |             |             |       |
| Symbol;Acc:HGNC:5273]               | -                                                      | 1576 1438   | 1826 900    | 876   |
| 803                                 | 4.262951148                                            | 3.763663488 | 6.27527957  |       |
| 2.762358318                         | 2.974246269                                            | 2.062395833 |             |       |
| ENSG00000019549                     | 1090.515661                                            | 868.1802452 | 1274.090848 |       |
| 600.861727                          | 695.1685234                                            | 554.6769061 | 1077.595585 |       |
| 616.9023855                         | 0.804731212                                            | 3.87E-05    | 0.000908747 | SNAI2 |
| 8                                   | 48917604                                               | 48921740    | - 3392      |       |
| protein_coding                      | snail family transcriptional repressor 2 [Source:HGNC  |             |             |       |
| Symbol;Acc:HGNC:11094]              | zf-C2H2                                                | 1202 981    | 1096 580    | 609   |
| 643                                 | 17.35310952                                            | 13.7037556  | 20.10303169 |       |
| 9.501325436                         | 11.03592675                                            | 8.814265895 |             |       |
| ENSG00000106397                     | 1886.174758                                            | 2055.843741 | 2286.621075 |       |
| 1272.169312                         | 1512.476672                                            | 1196.480356 | 2076.213191 |       |
| 1327.042113                         | 0.646041629                                            | 3.92E-05    | 0.000917777 | PL0D3 |
| 7                                   | 101205977                                              | 101218420   | - 5671      |       |
| protein_coding                      | "procollagen-lysine,2-oxoglutarate 5-dioxygenase 3     |             |             |       |
| [Source:HGNC Symbol;Acc:HGNC:9083]" | -                                                      | 2079        | 2323        | 1967  |
| 1228                                | 1325 1387                                              | 17.95244172 | 19.40957399 |       |
| 21.58000591                         | 12.0323585                                             | 14.36162529 | 11.37228754 |       |
| ENSG00000165424                     | 1555.028156                                            | 1314.217802 | 1915.786239 |       |
| 889.8969371                         | 1103.822598                                            | 715.9904076 | 1595.010732 |       |
| 903.2366475                         | 0.820897677                                            | 3.97E-05    | 0.000929706 |       |
| ZCCHC24 10                          | 79382325                                               | 79445627    | - 5051      |       |

|                                     |                                                       |             |      |             |             |        |
|-------------------------------------|-------------------------------------------------------|-------------|------|-------------|-------------|--------|
| protein_coding                      | zinc finger CCHC-type containing 24 [Source:HGNC      |             |      |             |             |        |
| Symbol;Acc:HGNC:26911]              | -                                                     | 1714        | 1485 | 1648        | 859         | 967    |
| 830                                 | 16.61736398                                           | 13.93078296 |      | 20.29956285 |             |        |
| 9.449913625                         | 11.76783216                                           | 7.640675261 |      |             |             |        |
| ENSG00000142230                     | 5036.150112                                           | 5088.72213  |      | 5757.821142 |             |        |
| 3822.723746                         | 3633.368489                                           | 3687.781919 |      | 5294.231128 |             |        |
| 3714.624718                         | 0.511002963                                           | 3.99E-05    |      | 0.000932508 |             | SAE1   |
| 19                                  | 47113274                                              | 47210636    |      | + 3396      |             |        |
| protein_coding                      | SUM01 activating enzyme subunit 1 [Source:HGNC        |             |      |             |             |        |
| Symbol;Acc:HGNC:30660]              | -                                                     | 5551        | 5750 | 4953        | 3690        | 3183   |
| 4275                                | 80.04463513                                           | 80.22811788 |      | 90.74182155 |             |        |
| 60.37688852                         | 57.61244642                                           | 58.53282101 |      |             |             |        |
| ENSG00000198440                     | 88.0033437                                            | 56.6396898  |      | 58.12458249 |             |        |
| 225.8411319                         | 165.5163151                                           | 179.4289214 |      | 67.58920533 |             |        |
| 190.2621228                         | -1.490981623                                          | 4.03E-05    |      | 0.000940736 |             | ZNF583 |
| 19                                  | 56397966                                              | 56436035    |      | + 8060      |             |        |
| protein_coding                      | zinc finger protein 583 [Source:HGNC                  |             |      |             |             |        |
| Symbol;Acc:HGNC:26427]              | zf-C2H2                                               | 97          | 64   | 50          | 218         | 145    |
| 208                                 | 0.589339263                                           | 0.376245551 |      | 0.385959566 |             |        |
| 1.502911804                         | 1.10580951                                            | 1.199939394 |      |             |             |        |
| ENSG00000204619                     | 1022.471839                                           | 1149.608704 |      | 1019.505177 |             |        |
| 1456.571704                         | 1769.312334                                           | 1766.684765 |      | 1063.861907 |             |        |
| 1664.189601                         | -0.64526414                                           | 4.04E-05    |      | 0.000940736 |             |        |
| PPP1R11 6                           | 30066709                                              | 30070333    |      | + 2538      |             |        |
| protein_coding                      | protein phosphatase 1 regulatory inhibitor subunit 11 |             |      |             |             |        |
| [Source:HGNC Symbol;Acc:HGNC:9285]  | -                                                     |             |      | 1127        | 1299        | 877    |
| 1406                                | 1550                                                  | 2048        |      | 21.7450786  | 24.25179978 |        |
| 21.49882983                         | 30.78263172                                           | 37.53940983 |      | 37.52056354 |             |        |
| ENSG00000189326                     | 0.907250966                                           | 3.539980612 |      | 2.3249833   |             |        |
| 21.75533839                         | 20.54685291                                           | 84.53862644 |      | 2.257404959 |             |        |
| 42.28027258                         | -4.230450857                                          | 4.04E-05    |      | 0.000940736 |             |        |
| SPANXN4 X                           | 143025918                                             | 143034702   |      | + 625       |             |        |
| protein_coding                      | SPANX family member N4 [Source:HGNC                   |             |      |             |             |        |
| Symbol;Acc:HGNC:33177]              | -                                                     | 1           | 4    | 2           | 21          | 18     |
| 98                                  | 0.078351744                                           | 0.303253914 |      | 0.199093382 |             |        |
| 1.867030106                         | 1.770271379                                           | 7.290831755 |      |             |             |        |
| ENSG00000140511                     | 342.9408651                                           | 308.8633084 |      | 418.496994  |             |        |
| 165.7549592                         | 190.6291353                                           | 151.824472  |      | 356.7670558 |             |        |
| 169.4028555                         | 1.07493996                                            | 4.08E-05    |      | 0.000947439 |             | HAPLN3 |
| 15                                  | 88877288                                              | 88895626    |      | - 3524      |             |        |
| protein_coding                      | hyaluronan and proteoglycan link protein 3            |             |      |             |             |        |
| [Source:HGNC Symbol;Acc:HGNC:21446] | -                                                     |             |      | 378         | 349         | 360    |
| 160                                 | 167                                                   | 176         |      | 5.252724023 | 4.692626276 |        |
| 6.355847197                         | 2.522877285                                           | 2.912915803 |      | 2.322243662 |             |        |
| ENSG00000100836                     | 635.9829272                                           | 1080.579082 |      | 828.8565464 |             |        |
| 306.6466745                         | 392.6731889                                           | 540.8746814 |      | 848.4728518 |             |        |
| 413.3981816                         | 1.03601478                                            | 4.10E-05    |      | 0.000951073 |             | PABPN1 |
| 14                                  | 23321289                                              | 23326185    |      | + 3876      |             |        |
| protein_coding                      | poly(A) binding protein nuclear 1 [Source:HGNC        |             |      |             |             |        |
| Symbol;Acc:HGNC:8565]               | -                                                     | 701         | 1221 | 713         | 296         | 344    |

|                           |                                                                    |             |             |        |
|---------------------------|--------------------------------------------------------------------|-------------|-------------|--------|
| 627                       | 8.85651644                                                         | 14.92651207 | 11.44491596 |        |
| 4.243458765               | 5.455342657                                                        | 7.521678919 |             |        |
| ENSG00000144152           | 137.9021468                                                        | 157.5291373 | 165.0738143 |        |
| 50.76245625               | 18.26386925                                                        | 1.725278091 | 153.5016995 |        |
| 23.58386786               | 2.710819276                                                        | 4.12E-05    | 0.000956017 | FBLN7  |
| 2                         | 112138385                                                          | 112188216   | + 6578      |        |
| protein_coding            | fibulin 7 [Source:HGNC Symbol;Acc:HGNC:26740]                      |             |             | -      |
| 152                       | 178                                                                | 142         | 49          | 16     |
| 2                         | 2                                                                  | 2           | 2           | 2      |
| 1.282190557               | 1.343078268                                                        | 0.413917944 | 0.149511113 |        |
| 0.014137322               |                                                                    |             |             |        |
| ENSG00000132481           | 509.8750429                                                        | 538.0770531 | 789.3318303 |        |
| 379.1644691               | 260.2601368                                                        | 251.8906012 | 612.4279754 |        |
| 297.1050691               | 1.042722254                                                        | 4.14E-05    | 0.000957757 | TRIM47 |
| 17                        | 75874161                                                           | 75878575    | - 3142      |        |
| protein_coding            | tripartite motif containing 47 [Source:HGNC Symbol;Acc:HGNC:19020] |             |             | -      |
| 292                       | 8.759086564                                                        | 9.16903941  | 13.44529824 | 228    |
| 6.472721905               | 4.460422794                                                        | 4.321233048 |             |        |
| ENSG00000205544           | 64.41481858                                                        | 110.6243941 | 155.7738811 |        |
| 4.14387398                | 19.40536108                                                        | 31.05500563 | 110.2710313 |        |
| 18.20141356               | 2.5872261                                                          | 4.17E-05    | 0.000965061 |        |
| TMEM256                   | 17                                                                 | 7402975     | 7404137     | - 707  |
| transmembrane protein 256 | [Source:HGNC Symbol;Acc:HGNC:28618]                                |             |             | -      |
| 71                        | 125                                                                | 134         | 4           | 17     |
| 36                        | 36                                                                 | 36          | 36          | 36     |
| 8.377550222               | 11.79212926                                                        | 0.314378343 | 1.478008283 |        |
| 2.367631477               |                                                                    |             |             |        |
| ENSG00000141756           | 4665.991718                                                        | 6018.852036 | 6215.842852 |        |
| 3568.911465               | 4096.814171                                                        | 3439.341874 | 5633.562202 |        |
| 3701.68917                | 0.605922148                                                        | 4.19E-05    | 0.000966842 | FKBP10 |
| 17                        | 41812680                                                           | 41823217    | + 4273      |        |
| protein_coding            | FK506 binding protein 10 [Source:HGNC Symbol;Acc:HGNC:18169]       |             |             | -      |
| 3987                      | 58.94029634                                                        | 75.41649122 | 77.85457493 | 3589   |
| 44.79900591               | 51.62831198                                                        | 43.38547543 |             |        |
| ENSG00000234741           | 3235.256945                                                        | 4194.877026 | 2915.529058 |        |
| 5814.891162               | 5303.371034                                                        | 4973.114096 | 3448.554343 |        |
| 5363.792097               | -0.636849912                                                       | 4.21E-05    | 0.000971452 | GAS5   |
| 1                         | 173863900                                                          | 173868882   | - 3631      |        |
| processed_transcript      | growth arrest specific 5 [Source:HGNC Symbol;Acc:HGNC:16355]       |             |             | -      |
| 5765                      | 48.09321092                                                        | 61.85553016 | 42.97423257 | 4646   |
| 85.89756188               | 78.65028791                                                        | 73.82510628 |             |        |
| ENSG00000166734           | 2385.16279                                                         | 1872.649744 | 2329.633266 |        |
| 1591.247608               | 1294.451733                                                        | 1256.00245  | 2195.815267 |        |
| 1380.567264               | 0.66944449                                                         | 4.23E-05    | 0.000975392 | CASC4  |
| 15                        | 44288729                                                           | 44415758    | + 7095      |        |
| protein_coding            | cancer susceptibility 4 [Source:HGNC Symbol;Acc:HGNC:24892]        |             |             | -      |
| 1456                      | 18.14541352                                                        | 14.13154691 | 17.5732531  | 1134   |
| 12.02959094               | 9.824444757                                                        | 9.542012767 |             |        |

|                                      |                                                       |             |             |        |  |
|--------------------------------------|-------------------------------------------------------|-------------|-------------|--------|--|
| ENSG00000173465                      | 689.5107341                                           | 1015.089441 | 888.1436205 |        |  |
| 1044.256243                          | 1872.046598                                           | 2171.262477 | 864.2479318 |        |  |
| 1695.855106                          | -0.972802782                                          | 4.30E-05    | 0.000988017 | SSSCA1 |  |
| 11                                   | 65570430                                              | 65573942    | + 2008      |        |  |
| protein_coding                       | Sjogren syndrome/scleroderma autoantigen 1            |             |             |        |  |
| [Source:HGNC Symbol;Acc:HGNC:11328]  | -                                                     | 760         | 1147        | 764    |  |
| 1008                                 | 1640 2517                                             | 18.53440153 | 27.06612918 |        |  |
| 23.67208419                          | 27.89387609                                           | 50.2027491  | 58.28415778 |        |  |
| ENSG00000081059                      | 88.91059467                                           | 58.40968011 | 166.2363059 |        |  |
| 27.97114936                          | 15.98088559                                           | 3.450556181 | 104.5188602 |        |  |
| 15.80086371                          | 2.735497414                                           | 4.30E-05    | 0.000988017 | TCF7   |  |
| 5                                    | 134114711                                             | 134151865   | + 10063     |        |  |
| protein_coding                       | transcription factor 7 [Source:HGNC                   |             |             |        |  |
| Symbol;Acc:HGNC:11639]               | HMG                                                   | 98 66       | 143 27      | 14     |  |
| 4                                    | 0.476899961                                           | 0.310772731 | 0.884128543 |        |  |
| 0.149089938                          | 0.085516107                                           | 0.01848262  |             |        |  |
| ENSG00000023902                      | 1917.021291                                           | 2294.792432 | 2327.308283 |        |  |
| 1456.571704                          | 1506.769213                                           | 1322.425656 | 2179.707335 |        |  |
| 1428.588858                          | 0.609710298                                           | 4.34E-05    | 0.0009949   |        |  |
| PLEKH01 1                            | 150149183                                             | 150164720   | + 6565      |        |  |
| protein_coding                       | pleckstrin homology domain containing 01 [Source:HGNC |             |             |        |  |
| Symbol;Acc:HGNC:24310]               | -                                                     | 2113 2593   | 2002 1406   | 1320   |  |
| 1533                                 | 15.76135134                                           | 18.71518943 | 18.97300798 |        |  |
| 11.90042945                          | 12.35909188                                           | 10.85771512 |             |        |  |
| ENSG000000236938                     | 1.814501932                                           | 4.424975766 | 1.16249165  |        |  |
| 60.0861727                           | 39.95221399                                           | 20.70333709 | 2.467323116 |        |  |
| 40.24724126                          | -3.99387745                                           | 4.40E-05    | 0.001008025 |        |  |
| AC003092.2                           | 7 94071759                                            | 94077157    | -           | 446    |  |
| lincRNA                              | novel transcript                                      |             | - 2 5       | 1      |  |
| 58                                   | 35 24                                                 | 0.219595694 | 0.531204306 |        |  |
| 0.139499287                          | 7.226120152                                           | 4.823702842 | 2.502115776 |        |  |
| ENSG000000251361                     | 73.48732824                                           | 55.75469465 | 56.96209084 |        |  |
| 10.35968495                          | 0 8.626390453                                         | 62.06803791 | 6.328691801 |        |  |
| 3.271115085                          | 4.42E-05                                              | 0.001011586 | AC012625.1  |        |  |
| 5                                    | 93019663                                              | 93068669    | - 625       |        |  |
| lincRNA                              | novel transcript                                      |             | - 81 63     | 49 10  |  |
| 0                                    | 10 6.346491242                                        | 4.776249145 | 4.877787869 |        |  |
| 0.889061955                          | 0                                                     | 0.743962424 |             |        |  |
| ENSG00000164077                      | 650.4989426                                           | 816.8505263 | 691.6825317 |        |  |
| 1068.083518                          | 1119.803483                                           | 1552.750281 | 719.6773335 |        |  |
| 1246.879094                          | -0.793349521                                          | 4.47E-05    | 0.001020262 | MON1A  |  |
| 3                                    | 49907160                                              | 49930173    | - 6446      |        |  |
| protein_coding                       | "MON1 homolog A, secretory trafficking associated     |             |             |        |  |
| [Source:HGNC Symbol;Acc:HGNC:28207]" | -                                                     | 717         | 923         | 595    |  |
| 1031                                 | 981 1800                                              | 5.447002041 | 6.784812349 |        |  |
| 5.742929847                          | 8.887516249                                           | 9.35461819  | 12.98414097 |        |  |
| ENSG00000177565                      | 3371.34459                                            | 2755.874907 | 3124.777555 |        |  |
| 2290.526342                          | 1965.648928                                           | 1683.871416 | 3083.999017 |        |  |
| 1980.015562                          | 0.639584377                                           | 4.47E-05    | 0.001020262 |        |  |
| TBL1XR1 3                            | 177019340                                             | 177228000   | - 11603     |        |  |

|                                     |                                                  |          |             |             |        |             |
|-------------------------------------|--------------------------------------------------|----------|-------------|-------------|--------|-------------|
| protein_coding                      | transducin beta like 1 X-linked receptor 1       |          |             |             |        |             |
| [Source:HGNC Symbol;Acc:HGNC:29529] | -                                                |          | 3716        | 3114        | 2688   |             |
| 2211                                | 1722                                             | 1952     | 15.6831789  | 12.71670969 |        |             |
| 14.4133794                          | 10.58840377                                      |          | 9.122423185 | 7.822409353 |        |             |
| ENSG00000081320                     | 2656.430828                                      |          | 1843.444904 | 2372.645457 |        |             |
| 1642.010064                         | 1246.509076                                      |          | 882.4797433 | 2290.840397 |        |             |
| 1256.999628                         | 0.866401589                                      |          | 4.49E-05    | 0.00102358  | STK17B |             |
| 2                                   | 196133566                                        |          | 196176503   | -           | 6580   |             |
| protein_coding                      | serine/threonine kinase 17b [Source:HGNC         |          |             |             |        |             |
| Symbol;Acc:HGNC:11396]              | -                                                | 2928     | 2083        | 2041        | 1585   | 1092        |
| 1023                                | 21.7908345                                       |          | 14.9999502  | 19.29851793 |        |             |
| 13.38490881                         | 10.20103188                                      |          | 7.229042171 |             |        |             |
| ENSG00000178773                     | 3.629003864                                      |          | 14.15992245 | 1.16249165  |        |             |
| 30.04308635                         | 78.76293614                                      |          | 89.71446071 | 6.317139321 |        |             |
| 66.1734944                          | -3.358994427                                     |          | 4.50E-05    | 0.001024554 | CPNE7  |             |
| 16                                  | 89575768                                         |          | 89597246    | +           | 3048   |             |
| protein_coding                      | copine 7 [Source:HGNC Symbol;Acc:HGNC:2320]      |          |             |             | -      |             |
| 4                                   | 16                                               | 1        | 29          | 69          | 104    | 0.064264882 |
| 0.248731885                         | 0.020412297                                      |          | 0.528682675 | 1.391494481 |        |             |
| 1.586534041                         |                                                  |          |             |             |        |             |
| ENSG00000173039                     | 2517.621431                                      |          | 2899.244122 | 3241.02672  |        |             |
| 3598.954551                         | 5355.879658                                      |          | 4955.861315 | 2885.964091 |        |             |
| 4636.898508                         | -0.684340463                                     |          | 4.51E-05    | 0.001024554 | RELA   |             |
| 11                                  | 65653596                                         |          | 65663094    | -           | 5464   |             |
| protein_coding                      | "RELA proto-oncogene, NF-kB subunit [Source:HGNC |          |             |             |        |             |
| Symbol;Acc:HGNC:9955]"              | RHD                                              | 2775     | 3276        | 2788        | 3474   | 4692        |
| 5745                                | 24.8702975                                       |          | 28.4092418  | 31.74599367 |        |             |
| 35.32898555                         | 52.78307324                                      |          | 48.88891066 |             |        |             |
| ENSG00000074696                     | 2680.926604                                      |          | 2699.235217 | 3024.803273 |        |             |
| 1936.225117                         | 2013.591585                                      |          | 1728.728647 | 2801.655032 |        |             |
| 1892.84845                          | 0.565854154                                      |          | 4.53E-05    | 0.001029582 | HACD3  |             |
| 15                                  | 65530418                                         |          | 65578352    | +           | 7097   |             |
| protein_coding                      | 3-hydroxyacyl-CoA dehydratase 3 [Source:HGNC     |          |             |             |        |             |
| Symbol;Acc:HGNC:24175]              | -                                                | 2955     | 3050        | 2602        | 1869   | 1764        |
| 2004                                | 20.38972477                                      |          | 20.36345546 | 22.81073786 |        |             |
| 14.63344366                         | 15.27816288                                      |          | 13.12967361 |             |        |             |
| ENSG00000035862                     | 10141.2513                                       |          | 8144.610394 | 12948.99449 |        |             |
| 5159.123105                         | 3863.949838                                      |          | 2424.878356 | 10411.61873 |        |             |
| 3815.983766                         | 1.448121648                                      |          | 4.60E-05    | 0.001043146 | TIMP2  |             |
| 17                                  | 78852977                                         |          | 78925387    | -           | 5633   |             |
| protein_coding                      | TIMP metalloproteinase inhibitor 2 [Source:HGNC  |          |             |             |        |             |
| Symbol;Acc:HGNC:11821]              | -                                                | 11178    | 9203        | 11139       | 4980   | 3385        |
| 2811                                | 97.17466175                                      |          | 77.41339456 | 123.0306446 |        |             |
| 49.12489501                         | 36.93739656                                      |          | 23.20342595 |             |        |             |
| ENSG00000259807                     | 51.71330506                                      |          | 51.32971888 | 58.12458249 |        |             |
| 4.14387398                          | 5.707459141                                      |          | 10.35166854 | 53.72253548 |        |             |
| 6.734333888                         | 2.977811496                                      |          | 4.61E-05    | 0.001043146 |        |             |
| AC009093.1                          | 16                                               | 29217170 | 29220031    | -           | 2099   |             |
| lincRNA                             | novel transcript                                 |          |             |             | 57     | 58          |
| 4                                   | 5                                                | 12       | 1.329814612 | 1.309308526 | 50     |             |

|                                      |                                                    |             |                 |        |
|--------------------------------------|----------------------------------------------------|-------------|-----------------|--------|
| 1.482055312                          | 0.105891133                                        | 0.146421525 | 0.26582745      |        |
| ENSG00000168939                      | 71.67282631                                        | 42.47976735 | 49.98714095     |        |
| 112.9205659                          | 182.6386925                                        | 232.0499032 | 54.71324487     |        |
| 175.8697205                          | -1.684621077                                       | 4.63E-05    | 0.001048396     | SPRY3  |
| X                                    | 155767812                                          | 155782459   | + 9019          |        |
| protein_coding                       | sprouty RTK signaling antagonist 3 [Source:HGNC    |             |                 |        |
| Symbol;Acc:HGNC:11271]               | -                                                  | 79 48       | 43 109          | 160    |
| 269                                  | 0.42894083                                         | 0.252179217 | 0.296631259     |        |
| 0.671552785                          | 1.090458033                                        | 1.386835376 |                 |        |
| ENSG00000140525                      | 2172.866064                                        | 1762.02535  | 2156.422011     |        |
| 1546.700963                          | 978.2584967                                        | 827.2708444 | 2030.437808     |        |
| 1117.410101                          | 0.861917788                                        | 4.72E-05    | 0.001065642     | FANCI  |
| 15                                   | 89243949                                           | 89317261    | + 7766          |        |
| protein_coding                       | FA complementation group I [Source:HGNC            |             |                 |        |
| Symbol;Acc:HGNC:25568]               | -                                                  | 2395 1991   | 1855 1493       | 857    |
| 959                                  | 15.10208169                                        | 12.14787501 | 14.86118273     |        |
| 10.68253846                          | 6.783140237                                        | 5.741855239 |                 |        |
| ENSG00000140612                      | 1643.031499                                        | 1777.955263 | 2350.558116     |        |
| 1319.823863                          | 1155.18973                                         | 958.3919793 | 1923.848293     |        |
| 1144.468524                          | 0.749217047                                        | 4.72E-05    | 0.001065642     | SEC11A |
| 15                                   | 84669538                                           | 84716716    | - 5748          |        |
| protein_coding                       | "SEC11 homolog A, signal peptidase complex subunit |             |                 |        |
| [Source:HGNC Symbol;Acc:HGNC:17718]" | -                                                  |             | 1811 2009       | 2022   |
| 1274                                 | 1012 1111                                          | 15.42873694 | 16.56111672     |        |
| 21.88624409                          | 12.31585911                                        | 10.8220893  | 8.987280935     |        |
| ENSG00000106333                      | 1799.985917                                        | 2024.86891  | 3010.853373     |        |
| 715.85423                            | 725.9888027                                        | 264.8301869 | 2278.5694       |        |
| 568.8910732                          | 2.002387646                                        | 4.74E-05    | 0.001067805     | PCOLCE |
| 7                                    | 100602177                                          | 100608175   | + 3532          |        |
| protein_coding                       | procollagen C-endopeptidase enhancer [Source:HGNC  |             |                 |        |
| Symbol;Acc:HGNC:8738]                | -                                                  | 1984 2288   | 2590 691        | 636    |
| 307                                  | 27.5074072                                         | 30.69458501 | 45.62321812     |        |
| 10.87099751                          | 11.06837286                                        | 4.041556911 |                 |        |
| ENSG00000186416                      | 910.8799698                                        | 889.4201289 | 769.5694722     |        |
| 1325.003705                          | 1225.962223                                        | 1644.19002  | 856.6231903     |        |
| 1398.385316                          | -0.707043023                                       | 4.87E-05    | 0.001096182     | NKRF   |
| X                                    | 119588337                                          | 119606443   | - 4552          |        |
| protein_coding                       | NFKB repressing factor [Source:HGNC                |             |                 |        |
| Symbol;Acc:HGNC:19374]               | Others                                             | 1004 1005   | 662 1279        | 1074   |
| 1906                                 | 10.80090492                                        | 10.46141063 | 9.048208147     |        |
| 15.6127834                           | 14.50271753                                        | 19.46935935 |                 |        |
| ENSG00000136068                      | 1417.126009                                        | 1214.21335  | 1613.53841      |        |
| 913.7242125                          | 909.7689871                                        | 600.3967755 | 1414.959256     |        |
| 807.963325                           | 0.809126646                                        | 4.95E-05    | 0.001111229     | FLNB   |
| 3                                    | 58008400                                           | 58172251    | + 13952         |        |
| protein_coding                       | filamin B [Source:HGNC Symbol;Acc:HGNC:3755]       |             |                 | -      |
| 1562                                 | 1372 1388                                          | 882 797     | 696 5.482431896 |        |
| 4.659551161                          | 6.189560968                                        | 3.512725078 | 3.511310329     |        |
| 2.319550276                          |                                                    |             |                 |        |
| ENSG00000116977                      | 535.2780699                                        | 463.7374602 | 463.8341683     |        |

|                                            |                                                      |             |             |                |
|--------------------------------------------|------------------------------------------------------|-------------|-------------|----------------|
| 833.9546384                                | 786.4878696                                          | 804.8422292 | 487.6165662 |                |
| 808.4282458                                | -0.728958014                                         | 4.95E-05    | 0.001111229 | LGALS8         |
| 1                                          | 236518000                                            | 236552981   | + 9710      |                |
| protein_coding                             | galectin 8 [Source:HGNC Symbol;Acc:HGNC:6569]        |             |             | -              |
| 590                                        | 524                                                  | 399         | 805         | 689            |
|                                            | 2.557045747                                          | 2.556586624 | 4.606686882 | 2.97551035     |
|                                            | 4.467796998                                          |             |             | 4.361615246    |
| ENSG00000114023                            | 1066.927136                                          | 1223.063302 | 1406.614896 |                |
| 1706.240111                                | 2055.826783                                          | 2102.251353 | 1232.201778 |                |
| 1954.772749                                | -0.666581067                                         | 4.96E-05    | 0.001111229 |                |
| FAM162A                                    | 3                                                    | 122384176   | 122412334   | + 3793         |
| protein_coding                             | family with sequence similarity 162 member A         |             |             |                |
| [Source:HGNC Symbol;Acc:HGNC:17865]        | -                                                    | 1176        | 1382        | 1210           |
| 1647                                       | 1801                                                 | 2437        | 15.18284515 | 17.26440602    |
| 19.84766286                                | 24.128082                                            | 29.18624544 | 29.87471044 |                |
| ENSG00000167658                            | 56230.50762                                          | 55801.59939 | 64778.6847  |                |
| 74669.50121                                | 87307.00248                                          | 89552.28457 | 58936.93057 |                |
| 83842.92942                                | -0.508540129                                         | 5.04E-05    | 0.001127522 | EEF2           |
| 19                                         | 3976056                                              | 3985469     | - 4027      | protein_coding |
| eukaryotic translation elongation factor 2 | [Source:HGNC                                         |             |             |                |
| Symbol;Acc:HGNC:3214]                      | -                                                    | 61979       | 63053       | 55724          |
|                                            | 103812                                               | 753.6880315 | 741.9088743 | 72077          |
|                                            |                                                      |             | 860.9293241 | 76485          |
| 994.5511322                                | 1167.459979                                          | 1198.662577 |             |                |
| ENSG00000151503                            | 3546.444026                                          | 3113.412949 | 3170.114729 |                |
| 2572.309773                                | 1795.566646                                          | 1794.289214 | 3276.657235 |                |
| 2054.055211                                | 0.673904962                                          | 5.11E-05    | 0.001142526 | NCAPD3         |
| 11                                         | 134150119                                            | 134225454   | - 9114      |                |
| protein_coding                             | non-SMC condensin II complex subunit D3 [Source:HGNC |             |             |                |
| Symbol;Acc:HGNC:28952]                     | -                                                    | 3909        | 3518        | 2727           |
|                                            | 2080                                                 | 21.00319332 | 18.28998089 | 2483           |
|                                            |                                                      |             | 18.61585383 | 1573           |
| 15.13839172                                | 10.60881946                                          | 10.61170892 |             |                |
| ENSG00000143756                            | 2103.91499                                           | 2000.089046 | 1668.175518 |                |
| 2827.158023                                | 2762.410224                                          | 3073.582918 | 1924.059851 |                |
| 2887.717055                                | -0.585378061                                         | 5.12E-05    | 0.001143019 | FBX028         |
| 1                                          | 224114087                                            | 224162047   | + 6044      |                |
| protein_coding                             | F-box protein 28 [Source:HGNC Symbol;Acc:HGNC:29046] |             |             |                |
| -                                          | 2319                                                 | 2260        | 1435        | 2729           |
|                                            |                                                      |             | 2420        | 3563           |
| 18.78905668                                | 17.71782567                                          | 14.7718297  | 25.089449   |                |
| 24.6115106                                 | 27.41084254                                          |             |             |                |
| ENSG0000010404                             | 5944.308329                                          | 5872.827836 | 5790.370908 |                |
| 8903.113245                                | 7564.666345                                          | 8254.593024 | 5869.169024 |                |
| 8240.790872                                | -0.489649541                                         | 5.15E-05    | 0.001148024 | IDS            |
| X                                          | 149476990                                            | 149521096   | - 9292      |                |
| protein_coding                             | iduronate 2-sulfatase [Source:HGNC                   |             |             |                |
| Symbol;Acc:HGNC:5389]                      | -                                                    | 6552        | 6636        | 4981           |
|                                            | 9569                                                 | 34.529745   | 33.83947504 | 8594           |
|                                            |                                                      |             | 33.35140907 | 6627           |
| 51.39231626                                | 43.83844387                                          | 47.88377391 |             |                |
| ENSG00000152234                            | 6901.458098                                          | 6482.589497 | 8498.976452 |                |
| 5433.654756                                | 4732.62512                                           | 3789.573326 | 7294.341349 |                |
| 4651.951067                                | 0.648971882                                          | 5.16E-05    | 0.001148024 |                |

|                         |                                                      |                               |             |       |  |
|-------------------------|------------------------------------------------------|-------------------------------|-------------|-------|--|
| ATP5F1A 18              | 46080248                                             | 46104334                      | -           | 10908 |  |
| protein_coding          | ATP synthase F1 subunit alpha                        | [Source:HGNC                  |             |       |  |
| Symbol;Acc:HGNC:823]    | -                                                    | 7607 7325                     | 7311 5245   | 4146  |  |
| 4393                    | 34.15049245                                          | 31.81917686                   | 41.70023489 |       |  |
| 26.71852055             | 23.36315707                                          | 18.72608939                   |             |       |  |
| ENSG00000166130         | 920.8597305                                          | 659.3213891                   | 795.1442885 |       |  |
| 511.7684365             | 430.3424192                                          | 365.7589552                   | 791.775136  |       |  |
| 435.9566036             | 0.861706403                                          | 5.16E-05                      | 0.001148024 | IKBIP |  |
| 12                      | 98613405                                             | 98645113                      | - 4163      |       |  |
| protein_coding          | IKBKB interacting protein                            | [Source:HGNC                  |             |       |  |
| Symbol;Acc:HGNC:26430]  | -                                                    | 1015 745                      | 684 494     | 377   |  |
| 424                     | 11.9395598                                           | 8.479618285                   | 10.22248631 |       |  |
| 6.59375159              | 5.566501104                                          | 4.735768493                   |             |       |  |
| ENSG0000010165          | 2202.805345                                          | 2508.961259                   | 2105.272378 |       |  |
| 3002.236698             | 3487.257535                                          | 3740.4029                     | 2272.346327 |       |  |
| 3409.965711             | -0.585416614                                         | 5.22E-05                      | 0.001160138 |       |  |
| METTL13 1               | 171781664                                            | 171814023                     | + 3827      |       |  |
| protein_coding          | methyltransferase like 13                            | [Source:HGNC                  |             |       |  |
| Symbol;Acc:HGNC:24248]  | -                                                    | 2428 2835                     | 1811 2898   | 3055  |  |
| 4336                    | 31.06840113                                          | 35.10112548                   | 29.44196789 |       |  |
| 42.07769706             | 49.06819839                                          | 52.6819485                    |             |       |  |
| ENSG00000158321         | 949.8917614                                          | 945.1748235                   | 756.7820641 |       |  |
| 595.6818846             | 463.4456822                                          | 319.1764468                   | 883.9495497 |       |  |
| 459.4346712             | 0.946059384                                          | 5.23E-05                      | 0.001160138 | AUTS2 |  |
| 7                       | 69598296                                             | 70793495                      | + 24197     |       |  |
| protein_coding          | "AUTS2, activator of transcription and developmental | regulator [Source:HGNC        |             |       |  |
| Symbol;Acc:HGNC:14262]" | -                                                    | 1047 1068                     | 2.091395499 |       |  |
| 651                     | 575 406                                              | 370 2.11891649                | 0.711002647 |       |  |
| 1.673887671             | 1.320439063                                          | 1.031363765                   |             |       |  |
| ENSG00000124813         | 1100.495422                                          | 946.0598187                   | 1163.654142 |       |  |
| 726.2139149             | 597.0002261                                          | 634.0396983                   | 1070.069794 |       |  |
| 652.4179464             | 0.71320401                                           | 5.31E-05                      | 0.001177005 | RUNX2 |  |
| 6                       | 45328157                                             | 45664349                      | + 8192      |       |  |
| protein_coding          | runt related transcription factor 2                  | [Source:HGNC                  |             |       |  |
| Symbol;Acc:HGNC:10472]  | Runt                                                 | 1213 1069                     | 1001 701    | 523   |  |
| 735                     | 7.251027309                                          | 6.183212929                   | 7.602404625 |       |  |
| 4.754886098             | 3.924272034                                          | 4.171847394                   |             |       |  |
| ENSG00000138411         | 609.6726491                                          | 650.4714375                   | 452.2092518 |       |  |
| 1039.0764               | 908.6274952                                          | 992.0349021                   | 570.7844462 |       |  |
| 979.9129326             | -0.778156216                                         | 5.35E-05                      | 0.001184421 | HECW2 |  |
| 2                       | 196189099                                            | 196593692                     | - 23683     |       |  |
| protein_coding          | "HECT, C2 and WW domain containing E3 ubiquitin      | protein ligase 2 [Source:HGNC |             |       |  |
| Symbol;Acc:HGNC:29853]" | -                                                    | 796 1150                      | 1.389508608 | 672   |  |
| 735                     | 389 1003                                             | 2.353294402                   | 2.065968583 |       |  |
| 1.470540754             | 1.021926669                                          |                               |             |       |  |
| 2.257834701             |                                                      |                               |             |       |  |
| ENSG00000083845         | 25465.62736                                          | 30269.48922                   | 33112.41216 |       |  |
| 38855.03437             | 46667.61041                                          | 44098.10799                   | 29615.84291 |       |  |
| 43206.91759             | -0.54492582                                          | 5.37E-05                      | 0.001187215 | RPS5  |  |
| 19                      | 58386400                                             | 58394806                      | + 3617      |       |  |



|                        |                                                       |             |       |             |             |       |  |
|------------------------|-------------------------------------------------------|-------------|-------|-------------|-------------|-------|--|
| protein_coding         | ribosomal protein S5 [Source:HGNC                     |             |       |             |             |       |  |
| Symbol;Acc:HGNC:10426] | -                                                     | 28069       | 34203 | 28484       | 37506       | 40883 |  |
| 51120                  | 380.020579                                            | 448.0661468 |       | 489.9585209 |             |       |  |
| 576.1880995            | 694.7708813                                           | 657.1633798 |       |             |             |       |  |
| ENSG00000130487        | 1.814501932                                           | 1.769990306 |       | 6.974949899 |             |       |  |
| 38.33083431            | 30.82027936                                           | 60.38473317 |       | 3.519814046 |             |       |  |
| 43.17861561            | -3.669003967                                          | 5.38E-05    |       | 0.001187215 |             |       |  |
| KLHDC7B 22             | 50545891                                              | 50551023    |       | +           | 5133        |       |  |
| protein_coding         | kelch domain containing 7B [Source:HGNC               |             |       |             |             |       |  |
| Symbol;Acc:HGNC:25145] | -                                                     | 2           | 2     | 6           | 37          | 27    |  |
| 70                     | 0.019080397                                           | 0.018462273 |       | 0.07272552  |             |       |  |
| 0.400536873            | 0.323325427                                           | 0.634100059 |       |             |             |       |  |
| ENSG00000162772        | 141.5311507                                           | 90.26950562 |       | 73.23697394 |             |       |  |
| 295.251021             | 307.0613018                                           | 199.2696195 |       | 101.6792101 |             |       |  |
| 267.1939808            | -1.388925056                                          | 5.49E-05    |       | 0.001210663 |             | ATF3  |  |
| 1                      | 212565334                                             | 212620777   |       | +           | 4040        |       |  |
| protein_coding         | activating transcription factor 3 [Source:HGNC        |             |       |             |             |       |  |
| Symbol;Acc:HGNC:785]   | TF_bZIP                                               | 156         | 102   | 63          | 285         | 269   |  |
| 231                    | 1.890914607                                           | 1.196314172 |       | 0.970210635 |             |       |  |
| 3.91990497             | 4.092778818                                           | 2.658652846 |       |             |             |       |  |
| ENSG00000236453        | 55.34230892                                           | 69.02962194 |       | 27.8997996  |             |       |  |
| 152.2873688            | 254.5526777                                           | 124.2200225 |       | 50.75724349 |             |       |  |
| 177.020023             | -1.79259661                                           | 5.50E-05    |       | 0.001211947 |             |       |  |
| AC003092.1             | 7                                                     | 94022833    |       | 94066661    | +           | 1064  |  |
| lincRNA                | novel transcript                                      |             | -     | 61          | 78          | 24    |  |
| 147                    | 223                                                   | 144         |       | 2.807481419 | 3.473596876 |       |  |
| 1.403383805            | 7.676933002                                           | 12.88280981 |       | 6.292915241 |             |       |  |
| ENSG00000113070        | 792.0300933                                           | 896.5000901 |       | 1052.054943 |             |       |  |
| 581.1783256            | 454.3137476                                           | 555.5395452 |       | 913.5283755 |             |       |  |
| 530.3438728            | 0.78299066                                            | 5.55E-05    |       | 0.001222148 |             | HBEGF |  |
| 5                      | 140332843                                             | 140346631   |       | -           | 3018        |       |  |
| protein_coding         | heparin binding EGF like growth factor [Source:HGNC   |             |       |             |             |       |  |
| Symbol;Acc:HGNC:3059]  | -                                                     | 873         | 1013  | 905         | 561         | 398   |  |
| 644                    | 14.165232                                             | 15.9043766  |       | 18.65675852 |             |       |  |
| 10.32893797            | 8.10608581                                            | 9.921964071 |       |             |             |       |  |
| ENSG00000151693        | 575.1971124                                           | 428.3376541 |       | 570.7834001 |             |       |  |
| 337.7257293            | 186.063168                                            | 222.5608737 |       | 524.7727222 |             |       |  |
| 248.783257             | 1.076032398                                           | 5.58E-05    |       | 0.001225859 |             | ASAP2 |  |
| 2                      | 9206765                                               | 9405683     | +     | 7257        |             |       |  |
| protein_coding         | "ArfGAP with SH3 domain, ankyrin repeat and PH domain |             |       |             |             |       |  |
| 2 [Source:HGNC         | Symbol;Acc:HGNC:2721]"                                | -           |       | 634         | 484         | 491   |  |
| 326                    | 163                                                   | 258         |       | 4.278197389 | 3.160200805 |       |  |
| 4.209506802            | 2.496160581                                           | 1.380631702 |       | 1.65307897  |             |       |  |
| ENSG00000229056        | 268.5462859                                           | 247.7986429 |       | 266.2105878 |             |       |  |
| 141.9276838            | 59.35757507                                           | 94.89029498 |       | 260.8518389 |             |       |  |
| 98.72518462            | 1.3997431                                             | 5.70E-05    |       | 0.001251055 |             |       |  |
| AC020571.1             | 2                                                     | 196260024   |       | 196264204   | +           | 1607  |  |
| antisense              | uncharacterized LOC101927482 [Source:NCBI             |             |       |             |             |       |  |
| gene;Acc:101927482]    | -                                                     | 296         | 280   | 229         | 137         | 52    |  |
| 110                    | 9.019958052                                           | 8.2559793   |       | 8.865973976 |             |       |  |

|                                      |                                                 |             |             |             |      |        |
|--------------------------------------|-------------------------------------------------|-------------|-------------|-------------|------|--------|
| 4.737145608                          | 1.989000201                                     | 3.182788839 |             |             |      |        |
| ENSG00000144366                      | 300.3000697                                     | 189.3889628 | 225.5233801 |             |      |        |
| 533.5237749                          | 461.1626986                                     | 438.220635  | 238.4041375 |             |      |        |
| 477.6357028                          | -1.001855008                                    | 5.71E-05    | 0.001251788 |             |      | GULP1  |
| 2                                    | 188291669                                       | 188595931   | +           | 11979       |      |        |
| protein_coding                       | "GULP, engulfment adaptor PTB domain containing |             |             |             | 1    |        |
| [Source:HGNC Symbol;Acc:HGNC:18649]" | -                                               |             | 331         | 214         |      | 194    |
| 515                                  | 404                                             | 508         | 1.353119374 | 0.846485746 |      |        |
| 1.007599658                          | 2.388904056                                     | 2.073042283 | 1.97185132  |             |      |        |
| ENSG00000196235                      | 4262.265038                                     | 4898.448173 | 4537.20491  |             |      |        |
| 5807.639382                          | 6722.245376                                     | 8098.455357 | 4565.972707 |             |      |        |
| 6876.113372                          | -0.590799149                                    | 5.73E-05    | 0.001253569 |             |      | SUPT5H |
| 19                                   | 39436156                                        | 39476670    | +           | 8568        |      |        |
| protein_coding                       | "SPT5 homolog, DSIF elongation factor subunit   |             |             |             |      |        |
| [Source:HGNC Symbol;Acc:HGNC:11469]" | -                                               |             | 4698        | 5535        |      | 3903   |
| 5606                                 | 5889                                            | 9388        | 26.85110966 | 30.61009012 |      |        |
| 28.34170283                          | 36.35680235                                     | 42.24832124 | 50.94770685 |             |      |        |
| ENSG00000152661                      | 5962.453348                                     | 5674.588922 | 9070.922344 |             |      |        |
| 4564.477189                          | 4423.280834                                     | 3547.171754 | 6902.654871 |             |      |        |
| 4178.309926                          | 0.724139454                                     | 5.74E-05    | 0.001254944 |             |      | GJA1   |
| 6                                    | 121435577                                       | 121449727   | +           | 3413        |      |        |
| protein_coding                       | gap junction protein alpha 1 [Source:HGNC       |             |             |             |      |        |
| Symbol;Acc:HGNC:4274]"               | -                                               | 6572        | 6412        | 7803        | 4406 | 3875   |
| 4112                                 | 94.29527904                                     | 89.01919574 | 142.2434133 |             |      |        |
| 71.73320713                          | 69.78832562                                     | 56.0206103  |             |             |      |        |
| ENSG00000100442                      | 719.450016                                      | 669.9413309 | 803.2817301 |             |      |        |
| 404.027713                           | 436.0498784                                     | 453.7481378 | 730.8910257 |             |      |        |
| 431.2752431                          | 0.760002739                                     | 5.75E-05    | 0.001256279 |             |      | FKBP3  |
| 14                                   | 45115600                                        | 45135319    | -           | 2262        |      |        |
| protein_coding                       | FK506 binding protein 3 [Source:HGNC            |             |             |             |      |        |
| Symbol;Acc:HGNC:3719]"               | -                                               | 793         | 757         | 691         | 390  | 382    |
| 526                                  | 17.16758753                                     | 15.85731742 | 19.00606864 |             |      |        |
| 9.580409                             | 10.38049641                                     | 10.81245123 |             |             |      |        |
| ENSG00000153774                      | 892.7349505                                     | 1133.678791 | 1175.279058 |             |      |        |
| 695.1348601                          | 609.5566362                                     | 630.5891421 | 1067.230933 |             |      |        |
| 645.0935461                          | 0.725760681                                     | 5.78E-05    | 0.001261353 |             |      | CFDP1  |
| 16                                   | 75293698                                        | 75433485    | -           | 3317        |      |        |
| protein_coding                       | craniofacial development protein 1 [Source:HGNC |             |             |             |      |        |
| Symbol;Acc:HGNC:1873]"               | -                                               | 984         | 1281        | 1011        | 671  | 534    |
| 731                                  | 14.52707941                                     | 18.29911553 | 18.96323953 |             |      |        |
| 11.24058961                          | 9.8956231                                       | 10.24714599 |             |             |      |        |
| ENSG00000078177                      | 411.8919386                                     | 284.0834442 | 328.9851369 |             |      |        |
| 607.077538                           | 614.1226036                                     | 643.5287278 | 341.6535065 |             |      |        |
| 621.5762898                          | -0.86334193                                     | 5.80E-05    | 0.001262444 |             |      | N4BP2  |
| 4                                    | 40056826                                        | 40158252    | +           | 9835        |      |        |
| protein_coding                       | NEDD4 binding protein 2 [Source:HGNC            |             |             |             |      |        |
| Symbol;Acc:HGNC:29851]"              | -                                               | 454         | 321         | 283         | 586  | 538    |
| 746                                  | 2.260529465                                     | 1.546525584 | 1.790271582 |             |      |        |
| 3.310817907                          | 3.362445638                                     | 3.526918965 |             |             |      |        |
| ENSG00000108055                      | 3451.182675                                     | 2739.944994 | 3070.140447 |             |      |        |

|                        |                                                      |             |                |             |
|------------------------|------------------------------------------------------|-------------|----------------|-------------|
| 2395.15916             | 1575.258723                                          | 1697.673641 | 3087.089372    |             |
| 1889.363841            | 0.708340524                                          | 5.91E-05    | 0.0012851      | SMC3        |
| 10                     | 110567691                                            | 110604636   | + 4275         |             |
| protein_coding         | structural maintenance of chromosomes 3 [Source:HGNC |             |                |             |
| Symbol;Acc:HGNC:2468]  | -                                                    | 3804 3096   | 2641 2312      | 1380        |
| 1968                   | 43.57456625                                          | 34.31557447 | 38.43608355    |             |
| 30.05133393            | 19.84222306                                          | 21.40523466 |                |             |
| ENSG00000178999        | 1659.362017                                          | 1762.910345 | 1990.185705    |             |
| 716.8901985            | 574.1703896                                          | 237.2257375 | 1804.152689    |             |
| 509.4287752            | 1.824989804                                          | 5.92E-05    | 0.001287552    | AURKB       |
| 17                     | 8204733 8210600                                      | - 2241      | protein_coding | aurora      |
| kinase B [Source:HGNC  | Symbol;Acc:HGNC:11390]                               |             |                |             |
|                        | -                                                    | 1829        | 1992           |             |
| 1712                   | 692 503                                              | 275         | 39.96690632    | 42.11859916 |
| 47.53010245            | 17.15837999                                          | 13.79664497 | 5.705869774    |             |
| ENSG00000144559        | 389.2106644                                          | 364.6180031 | 428.9594188    |             |
| 554.2431448            | 773.9314595                                          | 819.507093  | 394.2626954    |             |
| 715.8938991            | -0.861798816                                         | 6.01E-05    | 0.001305061    | TAMM41      |
| 3                      | 11790442                                             | 11846919    | - 5925         |             |
| protein_coding         | TAM41 mitochondrial translocator assembly and        |             |                |             |
| maintenance homolog    | [Source:HGNC Symbol;Acc:HGNC:25187]                  |             |                |             |
|                        | -                                                    |             |                | 429         |
| 412                    | 369 535                                              | 678 950     | 3.545664352    |             |
| 3.294847377            | 3.874760449                                          | 5.017385507 | 7.033778686    |             |
| 7.45531965             |                                                      |             |                |             |
| ENSG00000168542        | 113.4063707                                          | 115.0493699 | 254.5856713    |             |
| 34.18696033            | 60.49906689                                          | 12.07694663 | 161.013804     |             |
| 35.58765795            | 2.186895072                                          | 6.12E-05    | 0.001326927    | COL3A1      |
| 2                      | 188974320                                            | 189012746   | + 6811         |             |
| protein_coding         | collagen type III alpha 1 chain [Source:HGNC         |             |                |             |
| Symbol;Acc:HGNC:2201]  | -                                                    | 125 130     | 219 33         | 53          |
| 14                     | 0.898727056                                          | 0.904396583 | 2.000507027    |             |
| 0.269224825            | 0.478313182                                          | 0.095575851 |                |             |
| ENSG00000154133        | 700.3977457                                          | 762.865822  | 749.8071142    |             |
| 1136.457439            | 1041.040547                                          | 1671.79447  | 737.6902273    |             |
| 1283.097485            | -0.799576129                                         | 6.14E-05    | 0.001328433    | ROB04       |
| 11                     | 124883691                                            | 124898500   | - 7033         |             |
| protein_coding         | roundabout guidance receptor 4 [Source:HGNC          |             |                |             |
| Symbol;Acc:HGNC:17985] | -                                                    | 772 862     | 645 1097       | 912         |
| 1938                   | 5.375332909                                          | 5.807551761 | 5.705923488    |             |
| 8.667184744            | 7.970793925                                          | 12.81280373 |                |             |
| ENSG00000141543        | 2618.326288                                          | 3320.501815 | 3122.452572    |             |
| 4297.197317            | 4528.298082                                          | 4403.772326 | 3020.426891    |             |
| 4409.755908            | -0.545996994                                         | 6.16E-05    | 0.001331451    | EIF4A3      |
| 17                     | 80135214                                             | 80147183    | - 4967         |             |
| protein_coding         | eukaryotic translation initiation factor 4A3         |             |                |             |
| [Source:HGNC           | Symbol;Acc:HGNC:18683]                               |             |                |             |
|                        | -                                                    | 2886        | 3752           | 2686        |
| 4148                   | 3967 5105                                            | 28.45318256 | 35.79275358    |             |
| 33.64485763            | 46.40412963                                          | 49.09252847 | 47.78951297    |             |
| ENSG00000125648        | 594.2493827                                          | 631.8865393 | 530.0961924    |             |
| 997.6376606            | 924.6083808                                          | 917.8479442 | 585.4107048    |             |
| 946.6979952            | -0.692419709                                         | 6.16E-05    | 0.001331451    |             |

|                                      |                                                        |             |             |             |      |                |
|--------------------------------------|--------------------------------------------------------|-------------|-------------|-------------|------|----------------|
| SLC25A23                             | 19                                                     | 6436079     | 6465203     | -           | 4859 | protein_coding |
|                                      | solute carrier family 25 member 23 [Source:HGNC        |             |             |             |      |                |
| Symbol;Acc:HGNC:19375]               | -                                                      | 655         | 714         | 456         | 963  | 810            |
| 1064                                 | 6.601202941                                            | 6.962701127 | 5.83881601  |             |      |                |
| 11.01263973                          | 10.24673442                                            | 10.18182778 |             |             |      |                |
| ENSG00000083857                      | 2778.002458                                            | 2193.902985 | 3352.625918 |             |      |                |
| 1950.728676                          | 1566.126788                                            | 1597.607512 | 2774.843787 |             |      |                |
| 1704.820992                          | 0.702362507                                            | 6.24E-05    | 0.001344392 |             |      | FAT1           |
| 4                                    | 186587783                                              | 186726722   | -           | 16177       |      |                |
| protein_coding                       | FAT atypical cadherin 1 [Source:HGNC                   |             |             |             |      |                |
| Symbol;Acc:HGNC:3595]                | -                                                      | 3062        | 2479        | 2884        | 1883 | 1372           |
| 1852                                 | 9.269064076                                            | 7.261142872 | 11.0918533  |             |      |                |
| 6.467916107                          | 5.21318919                                             | 5.323215094 |             |             |      |                |
| ENSG00000128342                      | 108.8701159                                            | 130.9792827 | 125.5490982 |             |      |                |
| 32.11502334                          | 34.24475485                                            | 4.313195226 | 121.7994989 |             |      |                |
| 23.5576578                           | 2.384629368                                            | 6.24E-05    | 0.001344392 |             |      | LIF            |
| 22                                   | 30240447                                               | 30246851    | -           | 3969        |      |                |
| protein_coding                       | "LIF, interleukin 6 family cytokine [Source:HGNC       |             |             |             |      |                |
| Symbol;Acc:HGNC:6596]"               | -                                                      | 120         | 148         | 108         | 31   | 30             |
| 5                                    | 1.480569609                                            | 1.76688001  | 1.692970939 |             |      |                |
| 0.434002907                          | 0.464608891                                            | 0.058576029 |             |             |      |                |
| ENSG00000129460                      | 661.3859542                                            | 750.4758898 | 670.757682  |             |      |                |
| 978.9902277                          | 1244.226093                                            | 1140.408818 | 694.2065087 |             |      |                |
| 1121.208379                          | -0.691116405                                           | 6.45E-05    | 0.001387002 |             |      | NGDN           |
| 14                                   | 23469688                                               | 23509862    | +           | 4654        |      |                |
| protein_coding                       | neuroguidin [Source:HGNC Symbol;Acc:HGNC:20271] -      |             |             |             |      |                |
| 729                                  | 848                                                    | 577         | 945         | 1090        | 1322 | 7.670608775    |
| 8.633679329                          | 7.713585199                                            | 11.28281515 | 14.396187   |             |      |                |
| 13.20797062                          |                                                        |             |             |             |      |                |
| ENSG00000129116                      | 3074.673524                                            | 2062.923702 | 2734.180361 |             |      |                |
| 1762.18241                           | 1526.174574                                            | 797.9411169 | 2623.925862 |             |      |                |
| 1362.099367                          | 0.946560131                                            | 6.45E-05    | 0.001387002 |             |      | PALLD          |
| 4                                    | 168497066                                              | 168928457   | +           | 10114       |      |                |
| protein_coding                       | "palladin, cytoskeletal associated protein             |             |             |             |      |                |
| [Source:HGNC Symbol;Acc:HGNC:17068]" | -                                                      |             | 3389        | 2331        | 2352 |                |
| 1701                                 | 1337                                                   | 925         | 16.40881819 | 10.92058152 |      |                |
| 14.46842358                          | 9.345303452                                            | 8.125607086 | 4.252553652 |             |      |                |
| ENSG00000117597                      | 2024.076905                                            | 2264.702597 | 2073.885103 |             |      |                |
| 3258.120916                          | 2938.199966                                            | 2989.044292 | 2120.888202 |             |      |                |
| 3061.788391                          | -0.529580091                                           | 6.48E-05    | 0.001391585 |             |      | UTP25          |
| 1                                    | 209828007                                              | 209857565   | +           | 10376       |      |                |
| protein_coding                       | "UTP25, small subunit processor component [Source:HGNC |             |             |             |      |                |
| Symbol;Acc:HGNC:28440]"              | -                                                      | 2231        | 2559        | 1784        | 3145 | 2574           |
| 3465                                 | 10.52927069                                            | 11.68602372 | 10.69723985 |             |      |                |
| 16.84235164                          | 15.24845841                                            | 15.52759854 |             |             |      |                |
| ENSG00000033327                      | 178.7284403                                            | 153.9891566 | 210.4109886 |             |      |                |
| 348.0854143                          | 432.6254029                                            | 333.8413105 | 181.0428619 |             |      |                |
| 371.5173759                          | -1.038500685                                           | 6.50E-05    | 0.001394457 |             |      | GAB2           |
| 11                                   | 78215297                                               | 78418348    | -           | 6771        |      |                |
| protein_coding                       | GRB2 associated binding protein 2 [Source:HGNC         |             |             |             |      |                |

|                          |                                             |                        |                |                       |             |       |
|--------------------------|---------------------------------------------|------------------------|----------------|-----------------------|-------------|-------|
| Symbol;Acc:HGNC:14458]   | -                                           | 197                    | 174            | 181                   | 336         | 379   |
| 387                      | 1.424761253                                 | 1.217651128            |                | 1.663154548           |             |       |
| 2.757391975              | 3.440596604                                 | 2.657597272            |                |                       |             |       |
| ENSG00000115946          | 983.4600471                                 | 1180.583534            |                | 1034.617568           |             |       |
| 1511.478034              | 1828.669909                                 | 1619.173488            |                | 1066.220383           |             |       |
| 1653.107144              | -0.632189582                                | 6.52E-05               |                | 0.00139675            |             | PN01  |
| 2                        | 68157844                                    | 68176238               |                | +                     | 2674        |       |
| protein_coding           | partner of NOB1                             | homolog [Source:HGNC   |                |                       |             |       |
| Symbol;Acc:HGNC:32790]   | -                                           | 1084                   | 1334           | 890                   | 1459        | 1602  |
| 1877                     | 19.85164786                                 | 23.63855187            |                | 20.70787097           |             |       |
| 30.31837586              | 36.82548447                                 | 32.63877781            |                |                       |             |       |
| ENSG00000143036          | 13.60876449                                 | 21.23988367            |                | 25.5748163            |             | 0     |
| 0                        | 0                                           | 20.14115482            | 0              | 6.763697208           |             |       |
| 6.54E-05                 | 0.001398556                                 | SLC44A3                | 1              | 94820342              |             |       |
| 94895246                 | +                                           | 2869                   | protein_coding | solute carrier family |             |       |
| 44 member 3 [Source:HGNC | Symbol;Acc:HGNC:28689]                      | -                      | 15             | 24                    |             |       |
| 22                       | 0                                           | 0                      | 0              | 0.256029138           | 0.396375802 |       |
| 0.477088534              | 0                                           | 0                      | 0              |                       |             |       |
| ENSG00000134291          | 1993.230372                                 | 2066.463683            |                | 2190.134268           |             |       |
| 1579.851955              | 1152.906746                                 | 832.4466787            |                | 2083.276108           |             |       |
| 1188.401793              | 0.810390847                                 | 6.55E-05               |                | 0.001399056           |             |       |
| TMEM106C                 | 12                                          | 47963569               | 47968878       | +                     |             | 3475  |
| protein_coding           | transmembrane protein 106C [Source:HGNC     |                        |                |                       |             |       |
| Symbol;Acc:HGNC:28775]   | -                                           | 2197                   | 2335           | 1884                  | 1525        | 1010  |
| 965                      | 30.96021241                                 | 31.83893386            |                | 33.73128889           |             |       |
| 24.38524248              | 17.86544857                                 | 12.91229747            |                |                       |             |       |
| ENSG00000120437          | 1319.142905                                 | 1176.158558            |                | 1536.813961           |             |       |
| 821.5230165              | 883.514675                                  | 482.2152263            |                | 1344.038475           |             |       |
| 729.0843059              | 0.883519138                                 | 6.58E-05               |                | 0.001403644           |             | ACAT2 |
| 6                        | 159760328                                   | 159779055              |                | +                     | 4299        |       |
| protein_coding           | acetyl-CoA acetyltransferase 2 [Source:HGNC |                        |                |                       |             |       |
| Symbol;Acc:HGNC:94]      | -                                           | 1454                   | 1329           | 1322                  | 793         | 774   |
| 559                      | 16.56249061                                 | 14.64819041            |                | 19.13246188           |             |       |
| 10.24985651              | 11.06676979                                 | 6.046100765            |                |                       |             |       |
| ENSG00000112029          | 1069.648889                                 | 755.7858608            |                | 947.4306947           |             |       |
| 661.9838682              | 366.4188768                                 | 314.0006125            |                | 924.2884814           |             |       |
| 447.4677859              | 1.04715495                                  | 6.59E-05               |                | 0.001404053           |             | FBX05 |
| 6                        | 152970519                                   | 152983579              |                | -                     | 3833        |       |
| protein_coding           | F-box protein 5 [Source:HGNC                | Symbol;Acc:HGNC:13584] |                |                       |             |       |
| -                        | 1179                                        | 854                    | 815            | 639                   | 321         | 364   |
| 15.06272924              | 10.55712083                                 | 13.22895795            |                | 9.263478173           |             |       |
| 5.147704082              | 4.415639224                                 |                        |                |                       |             |       |
| ENSG00000183955          | 1064.205383                                 | 871.7202258            |                | 869.5437541           |             |       |
| 625.7249709              | 517.0957982                                 | 543.4625985            |                | 935.1564543           |             |       |
| 562.0944559              | 0.734655148                                 | 6.62E-05               |                | 0.001408238           |             | KMT5A |
| 12                       | 123383773                                   | 123409358              |                | +                     | 4579        |       |
| protein_coding           | lysine methyltransferase 5A [Source:HGNC    |                        |                |                       |             |       |
| Symbol;Acc:HGNC:29489]   | -                                           | 1173                   | 985            | 748                   | 604         | 453   |
| 630                      | 12.54457788                                 | 10.19276538            |                | 10.16337151           |             |       |
| 7.329567331              | 6.080998814                                 | 6.397361967            |                |                       |             |       |

|                                                                 |              |             |             |             |                |
|-----------------------------------------------------------------|--------------|-------------|-------------|-------------|----------------|
| ENSG00000132376                                                 | 826.50563    | 1002.699508 | 778.8694054 |             |                |
| 1194.471675                                                     | 1451.977605  | 1678.695582 | 869.3581813 |             |                |
| 1441.714954                                                     | -0.729472825 | 6.63E-05    | 0.001408238 | INPP5K      |                |
| 17                                                              | 1494571      | 1516888     | -           | 5325        | protein_coding |
| inositol polyphosphate-5-phosphatase K [Source:HGNC             |              |             |             |             |                |
| Symbol;Acc:HGNC:33882] -                                        |              |             |             |             |                |
| 1946                                                            | 8.377751002  | 10.08176891 | 7.828202243 | 670         | 1153 1272      |
| 12.03155439                                                     | 14.68300205  | 16.99238119 |             |             |                |
| ENSG00000079974                                                 | 373.787398   | 377.0079352 | 338.2850701 |             |                |
| 495.1929406                                                     | 722.5643272  | 851.4247377 | 363.0268011 |             |                |
| 689.7273352                                                     | -0.925994972 | 6.63E-05    | 0.001408238 | RABL2B      |                |
| 22                                                              | 50767501     | 50783663    | -           | 5870        |                |
| protein_coding "RAB, member of RAS oncogene family like 2B      |              |             |             |             |                |
| [Source:HGNC Symbol;Acc:HGNC:9800]" -                           |              |             |             |             |                |
| 478                                                             | 633          | 987         | 3.437065419 | 3.438728901 | 291            |
| 3.084336365                                                     | 4.524825539  | 6.628465023 | 7.81825929  |             |                |
| ENSG00000139343                                                 | 832.8563868  | 1163.768626 | 1005.555277 |             |                |
| 624.6890024                                                     | 523.9447491  | 621.9627516 | 1000.726763 |             |                |
| 590.1988344                                                     | 0.761173475  | 6.67E-05    | 0.001412564 | SNRPF       |                |
| 12                                                              | 95858928     | 95903828    | +           | 3043        |                |
| protein_coding small nuclear ribonucleoprotein polypeptide F    |              |             |             |             |                |
| [Source:HGNC Symbol;Acc:HGNC:11162] -                           |              |             |             |             |                |
| 603                                                             | 459          | 721         | 14.77302431 | 20.47624142 | 865            |
| 17.68564901                                                     | 11.01101625  | 9.271672726 | 11.01702489 |             |                |
| ENSG00000163041                                                 | 3734.244976  | 3812.55912  | 4480.242819 |             |                |
| 2831.301897                                                     | 2854.871062  | 2597.406165 | 4009.015638 |             |                |
| 2761.193041                                                     | 0.537854396  | 6.67E-05    | 0.001412564 | H3F3A       |                |
| 1                                                               | 226061851    | 226072001   | +           | 3146        |                |
| protein_coding H3 histone family member 3A [Source:HGNC         |              |             |             |             |                |
| Symbol;Acc:HGNC:4764] -                                         |              |             |             |             |                |
| 3011                                                            | 64.06861435  | 64.88486676 | 76.21840192 | 3854        | 2733 2501      |
| 48.27174038                                                     | 48.86549851  | 44.50236131 |             |             |                |
| ENSG00000101150                                                 | 6085.83948   | 7600.338375 | 7047.024382 |             |                |
| 8517.732965                                                     | 10938.91619  | 12300.37015 | 6911.067412 |             |                |
| 10585.6731                                                      | -0.615209178 | 6.68E-05    | 0.001412564 |             |                |
| TPD52L2 20                                                      | 63865228     | 63891545    | +           | 4694        |                |
| protein_coding tumor protein D52 like 2 [Source:HGNC            |              |             |             |             |                |
| Symbol;Acc:HGNC:12007] -                                        |              |             |             |             |                |
| 14259                                                           | 69.98075961  | 86.6912752  | 80.3488552  | 6062        | 8222 9583      |
| 97.32993444                                                     | 125.4890302  | 141.2462745 |             |             |                |
| ENSG00000111885                                                 | 605.1363943  | 521.2621452 | 696.3324983 |             |                |
| 387.4522171                                                     | 318.4762201  | 267.418104  | 607.5770126 |             |                |
| 324.4488471                                                     | 0.905328715  | 6.72E-05    | 0.001420271 | MAN1A1      |                |
| 6                                                               | 119177209    | 119349761   | -           | 5014        |                |
| protein_coding mannosidase alpha class 1A member 1 [Source:HGNC |              |             |             |             |                |
| Symbol;Acc:HGNC:6821] -                                         |              |             |             |             |                |
| 310                                                             | 6.514336491  | 5.566182044 | 7.432746813 | 599         | 374 279        |
| 4.144759315                                                     | 3.42032389   | 2.874804939 |             |             |                |
| ENSG00000102226                                                 | 2288.086936  | 2246.117699 | 2715.580494 |             |                |
| 2965.977801                                                     | 4537.430017  | 4076.832128 | 2416.595043 |             |                |

|                            |                                            |                        |                       |       |
|----------------------------|--------------------------------------------|------------------------|-----------------------|-------|
| 3860.079982                | -0.675918988                               | 6.77E-05               | 0.001429041           | USP11 |
| X                          | 47232690                                   | 47248328               | + 5269                |       |
| protein_coding             | ubiquitin specific peptidase 11            | [Source:HGNC           |                       |       |
| Symbol;Acc:HGNC:12609]     | -                                          | 2522 2538              | 2336 2863             | 3975  |
| 4726                       | 23.43935017                                | 22.82390022            | 27.58363431           |       |
| 30.19292534                | 46.37204991                                | 41.70580774            |                       |       |
| ENSG00000165672            | 2435.061593                                | 2632.860581            | 2614.443721           |       |
| 1944.512865                | 1659.729118                                | 1525.145832            | 2560.788631           |       |
| 1709.795938                | 0.582991055                                | 6.82E-05               | 0.001437055           | PRDX3 |
| 10                         | 119167703                                  | 119178833              | - 3417                |       |
| protein_coding             | peroxiredoxin 3                            | [Source:HGNC           | Symbol;Acc:HGNC:9354] |       |
| -                          | 2684 2975                                  | 2249 1877              | 1454 1768             |       |
| 38.46504247                | 41.25422492                                | 40.94975646            | 30.52328962           |       |
| 26.15572653                | 24.05848635                                |                        |                       |       |
| ENSG00000145414            | 441.8312204                                | 407.0977704            | 464.99666             |       |
| 681.6672696                | 698.5929988                                | 869.5401576            | 437.9752169           |       |
| 749.9334754                | -0.777418503                               | 6.91E-05               | 0.001454859           | NAF1  |
| 4                          | 163110073                                  | 163166921              | - 4808                |       |
| protein_coding             | nuclear assembly factor 1                  | ribonucleoprotein      |                       |       |
| [Source:HGNC               | Symbol;Acc:HGNC:25126]                     | -                      | 487 460               | 400   |
| 658                        | 612 1008                                   | 4.960131447            | 4.533355879           |       |
| 5.176096673                | 7.604549274                                | 7.824098753            | 9.748259715           |       |
| ENSG00000196365            | 4712.261517                                | 5345.370725            | 4727.85354            |       |
| 6338.055252                | 7040.721596                                | 8849.813965            | 4928.495261           |       |
| 7409.530271                | -0.588320013                               | 6.92E-05               | 0.00145527            | LONP1 |
| 19                         | 5691834 5720572                            | - 5085                 | protein_coding        | "lon  |
| peptidase 1, mitochondrial | [Source:HGNC                               | Symbol;Acc:HGNC:9479]" | -                     |       |
| 5194                       | 6040 4067                                  | 6118 6168              | 10259 50.01953748     |       |
| 56.28237587                | 49.76111027                                | 66.85448675            | 74.55911905           |       |
| 93.8091262                 |                                            |                        |                       |       |
| ENSG00000083720            | 1005.23407                                 | 882.3401677            | 856.756346            |       |
| 673.3795217                | 370.9848442                                | 340.7424229            | 914.7768613           |       |
| 461.7022629                | 0.987223365                                | 6.93E-05               | 0.00145527            | OXCT1 |
| 5                          | 41730065                                   | 41870519               | - 4194                |       |
| protein_coding             | 3-oxoacid CoA-transferase 1                | [Source:HGNC           |                       |       |
| Symbol;Acc:HGNC:8527]      | -                                          | 1108 997               | 737 650               | 325   |
| 395                        | 12.93719183                                | 11.26401378            | 10.93316515           |       |
| 8.61186026                 | 4.763238143                                | 4.379249486            |                       |       |
| ENSG00000100353            | 5451.671055                                | 6121.511474            | 6264.667501           |       |
| 7447.57751                 | 8959.569359                                | 9531.298811            | 5945.95001            |       |
| 8646.14856                 | -0.540287558                               | 7.06E-05               | 0.001482087           | EIF3D |
| 22                         | 36510850                                   | 36529436               | - 4070                |       |
| protein_coding             | eukaryotic translation initiation factor 3 | subunit D              |                       |       |
| [Source:HGNC               | Symbol;Acc:HGNC:3278]                      | -                      | 6009 6917             | 5389  |
| 7189                       | 7849 11049                                 | 72.29969719            | 80.52853666           |       |
| 82.3797787                 | 98.149054                                  | 118.5406434            | 126.2291281           |       |
| ENSG00000127948            | 878.2189351                                | 1171.733583            | 1062.517368           |       |
| 1407.881185                | 1975.922355                                | 1725.278091            | 1037.489962           |       |
| 1703.02721                 | -0.71489018                                | 7.07E-05               | 0.001482087           | POR   |
| 7                          | 75899200                                   | 75986855               | + 6112                |       |

|                                        |                                                        |               |              |             |             |                |             |
|----------------------------------------|--------------------------------------------------------|---------------|--------------|-------------|-------------|----------------|-------------|
| protein_coding                         | cytochrome p450 oxidoreductase                         | [Source:HGNC  |              |             |             |                |             |
| Symbol;Acc:HGNC:9208]                  | -                                                      | 968           | 1324         | 914         | 1359        | 1731           |             |
| 2000                                   | 7.755694528                                            | 10.26434121   |              | 9.303999894 |             |                |             |
| 12.35515377                            | 17.4084892                                             | 15.2152001    |              |             |             |                |             |
| ENSG00000179409                        | 1909.763283                                            | 2200.982946   |              | 1965.77338  |             |                |             |
| 2569.201867                            | 3204.167562                                            | 3557.523423   |              | 2025.506536 |             |                |             |
| 3110.297617                            | -0.618836009                                           | 7.13E-05      |              | 0.001492174 |             | GEMIN4         |             |
| 17                                     | 744414                                                 | 753999        | -            | 5751        |             | protein_coding | gem         |
| nuclear organelle associated protein 4 | [Source:HGNC                                           |               |              |             |             |                |             |
| Symbol;Acc:HGNC:15717]                 | -                                                      | 2105          | 2487         | 1691        | 2480        | 2807           |             |
| 4124                                   | 17.92410239                                            | 20.49079736   |              | 18.2939331  |             |                |             |
| 23.96185065                            | 30.00173739                                            | 33.34312551   |              |             |             |                |             |
| ENSG00000079308                        | 511.6895448                                            | 434.5326202   |              | 770.7319639 |             |                |             |
| 258.9921237                            | 262.5431205                                            | 324.352281    |              | 572.318043  |             |                |             |
| 281.9625084                            | 1.018438085                                            | 7.14E-05      |              | 0.001492174 |             | TNS1           |             |
| 2                                      | 217799588                                              | 218033982     |              | -           | 16281       |                |             |
| protein_coding                         | tensin 1                                               | [Source:HGNC  |              |             |             |                |             |
| Symbol;Acc:HGNC:11973]                 | -                                                      | 564           | 491          | 663         | 250         | 230            | 376         |
| 1.428982324                            | 2.533607283                                            | 0.853239546   |              | 0.868348623 |             |                |             |
| 1.073835573                            |                                                        |               |              |             |             |                |             |
| ENSG00000203760                        | 410.9846876                                            | 390.2828625   |              | 437.0968604 |             |                |             |
| 258.9921237                            | 111.8661992                                            | 168.2146138   |              | 412.7881368 |             |                |             |
| 179.6909789                            | 1.198469475                                            | 7.14E-05      |              | 0.001492174 |             | CENPW          |             |
| 6                                      | 126340174                                              | 126348875     |              | +           | 795         |                |             |
| protein_coding                         | centromere protein W                                   | [Source:HGNC  |              |             |             |                |             |
| Symbol;Acc:HGNC:21488]                 | -                                                      | 195           | 27.90356911  | 26.28438995 | 29.42575149 | 98             |             |
| 17.47370195                            | 7.57715737                                             | 11.40508433   |              |             |             |                |             |
| ENSG00000124788                        | 531.6490661                                            | 450.4625329   |              | 625.4205076 |             |                |             |
| 237.2367853                            | 248.8452185                                            | 339.8797838   |              | 535.8440355 |             |                |             |
| 275.3205959                            | 0.957614055                                            | 7.21E-05      |              | 0.001503171 |             | ATXN1          |             |
| 6                                      | 16299112                                               | 16761491      |              | -           | 17812       |                |             |
| protein_coding                         | ataxin 1                                               | [Source:HGNC  |              |             |             |                |             |
| Symbol;Acc:HGNC:10548]                 | -                                                      | 586           | 509          | 538         | 229         | 218            | 394         |
| 1.354040133                            | 1.879214851                                            | 0.714389133   |              | 0.752300183 |             |                |             |
| 1.028524292                            |                                                        |               |              |             |             |                |             |
| ENSG00000170037                        | 757.5545566                                            | 726.5810207   |              | 714.9323647 |             |                |             |
| 453.7542008                            | 436.0498784                                            | 450.2975816   |              | 733.0226473 |             |                |             |
| 446.7005536                            | 0.714547367                                            | 7.24E-05      |              | 0.00150773  |             | CNTROB         |             |
| 17                                     | 7932101                                                | 7949918       | +            | 6234        |             |                |             |
| protein_coding                         | "centrobin, centriole duplication and spindle assembly | protein       | [Source:HGNC |             |             |                |             |
| Symbol;Acc:HGNC:29616]"                | -                                                      | 615           | 438          | 382         | 522         | 6.559162056    | 6.240261654 |
| 6.137834365                            | 3.904085824                                            | 3.766551632   |              | 3.893451088 |             |                |             |
| ENSG00000215030                        | 2561.169477                                            | 2826.674519   |              | 3236.376753 |             |                |             |
| 3778.177101                            | 4657.286659                                            | 4429.651497   |              | 2874.74025  |             |                |             |
| 4288.371752                            | -0.577328157                                           | 7.25E-05      |              | 0.00150773  |             |                |             |
| RPL13P12                               | 17                                                     | 17383377      |              | 17384012    |             | -              | 636         |
| processed_pseudogene                   | ribosomal protein L13                                  | pseudogene 12 | [Source:HGNC |             |             |                |             |
| Symbol;Acc:HGNC:35701]                 | -                                                      | 2823          | 3194         | 2784        |             |                |             |



|                        |                                                        |      |              |                 |        |
|------------------------|--------------------------------------------------------|------|--------------|-----------------|--------|
| 3647                   | 4080                                                   | 5135 | 217.3614117  | 237.9601516     |        |
| 272.3447212            | 318.6329551                                            |      | 394.321455   | 375.4173592     |        |
| ENSG00000198805        | 842.8361474                                            |      | 1142.528743  | 840.4814629     |        |
| 1236.946383            | 1739.633546                                            |      | 1912.470763  | 941.9487843     |        |
| 1629.683564            | -0.790541976                                           |      | 7.31E-05     | 0.001519236     | PNP    |
| 14                     | 20468954                                               |      | 20477094     | + 4139          |        |
| protein_coding         | purine nucleoside phosphorylase                        |      | [Source:HGNC |                 |        |
| Symbol;Acc:HGNC:7892]  | -                                                      |      | 929 1291     | 723 1194        | 1524   |
| 2217                   | 10.99129771                                            |      | 14.77941543  | 10.8680022      |        |
| 16.02953574            | 22.63272783                                            |      | 24.90584522  |                 |        |
| ENSG00000106976        | 1283.760117                                            |      | 1085.889053  | 1221.778724     |        |
| 820.487048             | 722.5643272                                            |      | 745.3201351  | 1197.142631     |        |
| 762.7905034            | 0.650034117                                            |      | 7.36E-05     | 0.001528069     | DNM1   |
| 9                      | 128191655                                              |      | 128255248    | + 10775         |        |
| protein_coding         | dynamin 1                                              |      | [Source:HGNC |                 |        |
| Symbol;Acc:HGNC:2972]  | -                                                      |      |              |                 | -      |
| 1415                   | 1227 1051                                              |      | 792 633      | 864 6.430842075 |        |
| 5.395773672            | 6.068652695                                            |      | 4.084321743  | 3.611052407     |        |
| 3.728442775            |                                                        |      |              |                 |        |
| ENSG00000168916        | 176.9139384                                            |      | 98.234462    | 284.8104542     |        |
| 45.58261378            | 42.23519764                                            |      | 74.18695789  | 186.6529515     |        |
| 54.00158977            | 1.781459919                                            |      | 7.39E-05     | 0.001532339     | ZNF608 |
| 5                      | 124636913                                              |      | 124748807    | - 6922          |        |
| protein_coding         | zinc finger protein 608                                |      | [Source:HGNC |                 |        |
| Symbol;Acc:HGNC:29238] | -                                                      |      | 195 111      | 245 44          | 37     |
| 86                     | 1.379531749                                            |      | 0.759832429  | 2.202121799     |        |
| 0.353210109            | 0.328562118                                            |      | 0.577694023  |                 |        |
| ENSG00000168778        | 246.7722627                                            |      | 200.0089046  | 274.3480294     |        |
| 108.776692             | 105.0172482                                            |      | 100.0661293  | 240.3763989     |        |
| 104.6200231            | 1.199422996                                            |      | 7.63E-05     | 0.001579514     | TCTN2  |
| 12                     | 123671113                                              |      | 123708403    | + 5106          |        |
| protein_coding         | tectonic family member 2                               |      | [Source:HGNC |                 |        |
| Symbol;Acc:HGNC:25774] | -                                                      |      | 272 226      | 236 105         | 92     |
| 116                    | 2.608655784                                            |      | 2.097268671  | 2.875663328     |        |
| 1.142669229            | 1.107527139                                            |      | 1.056350876  |                 |        |
| ENSG00000166450        | 247.6795137                                            |      | 194.6989337  | 281.3229793     |        |
| 68.37392066            | 133.5545439                                            |      | 64.6979284   | 241.2338089     |        |
| 88.87546432            | 1.445018309                                            |      | 7.63E-05     | 0.001579514     | PRTG   |
| 15                     | 55611546                                               |      | 55743090     | - 14566         |        |
| protein_coding         | protogenin                                             |      | [Source:HGNC |                 |        |
| Symbol;Acc:HGNC:26373] | -                                                      |      |              |                 | -      |
| 273                    | 220 242                                                |      | 66 117       | 75 0.91780628   |        |
| 0.715663414            | 1.033669988                                            |      | 0.251776779  | 0.493733865     |        |
| 0.239415341            |                                                        |      |              |                 |        |
| ENSG00000153885        | 960.778773                                             |      | 948.7148041  | 1145.054275     |        |
| 674.4154902            | 614.1226036                                            |      | 611.6110831  | 1018.182617     |        |
| 633.3830589            | 0.684207294                                            |      | 7.74E-05     | 0.001600006     | KCTD15 |
| 19                     | 33795933                                               |      | 33815763     | + 6388          |        |
| protein_coding         | potassium channel tetramerization domain containing 15 |      | [Source:HGNC |                 |        |
| Symbol;Acc:HGNC:23297] | -                                                      |      |              | 1059 1072       | 985    |
| 651                    | 538 709                                                |      | 8.118199809  | 7.951632841     |        |
| 9.593524072            | 5.662759597                                            |      | 5.176839832  | 5.160744351     |        |

|                             |                                                    |             |             |            |  |
|-----------------------------|----------------------------------------------------|-------------|-------------|------------|--|
| ENSG00000124201             | 1451.601546                                        | 1477.941906 | 1431.027221 |            |  |
| 1945.548833                 | 2112.901374                                        | 2579.290745 | 1453.523557 |            |  |
| 2212.580318                 | -0.60652348                                        | 7.90E-05    | 0.001631014 | ZNFX1      |  |
| 20                          | 49237946                                           | 49278426    | - 9340      |            |  |
| protein_coding              | zinc finger NFX1-type containing 1 [Source:HGNC    |             |             |            |  |
| Symbol;Acc:HGNC:29271]      | -                                                  | 1600 1670   | 1231 1878   | 1851       |  |
| 2990                        | 8.388837659                                        | 8.472196807 | 8.200078752 |            |  |
| 11.17276734                 | 12.18167203                                        | 14.88522248 |             |            |  |
| ENSG00000104881             | 1301.905136                                        | 1619.54113  | 1633.300768 |            |  |
| 2604.424796                 | 1972.497879                                        | 2587.917136 | 1518.249011 |            |  |
| 2388.279937                 | -0.654181668                                       | 8.00E-05    | 0.001648715 |            |  |
| PPP1R13L                    | 19 45379634                                        | 45406349    | -           | 5032       |  |
| protein_coding              | protein phosphatase 1 regulatory subunit 13        |             |             |            |  |
| like [Source:HGNC           | Symbol;Acc:HGNC:18838]                             | -           | 1435 1830   |            |  |
| 1405                        | 2514 1728                                          | 3000        | 13.96496824 | 17.2320481 |  |
| 17.37170871                 | 27.7611009                                         | 21.1081643  | 27.72117538 |            |  |
| ENSG00000184164             | 554.3303402                                        | 573.4768592 | 591.7082498 |            |  |
| 398.8478705                 | 229.4398575                                        | 232.0499032 | 573.1718164 |            |  |
| 286.7792104                 | 0.999320531                                        | 8.01E-05    | 0.00164925  | CRELD2     |  |
| 22                          | 49918167                                           | 49927540    | + 5165      |            |  |
| protein_coding              | cysteine rich with EGF like domains 2 [Source:HGNC |             |             |            |  |
| Symbol;Acc:HGNC:28150]      | -                                                  | 611 648     | 509 385     | 201        |  |
| 269                         | 5.792947171                                        | 5.944716125 | 6.131324519 |            |  |
| 4.141927066                 | 2.392065634                                        | 2.421658907 |             |            |  |
| ENSG00000168175             | 2410.565817                                        | 2314.262325 | 2209.896626 |            |  |
| 3298.523688                 | 3080.886444                                        | 3561.836618 | 2311.574923 |            |  |
| 3313.748917                 | -0.51964047                                        | 8.02E-05    | 0.001650209 |            |  |
| MAPK1IP1L                   | 14 55051631                                        | 55070192    | + 6988      |            |  |
| protein_coding              | mitogen-activated protein kinase 1 interacting     |             |             |            |  |
| protein 1 like [Source:HGNC | Symbol;Acc:HGNC:19840]                             | -           | 2657        |            |  |
| 2615                        | 1901 3184                                          | 2699 4129   | 18.61947116 |            |  |
| 17.73149026                 | 16.92528799                                        | 25.31816387 | 23.74090928 |            |  |
| 27.47407027                 |                                                    |             |             |            |  |
| ENSG00000072682             | 347.47712                                          | 293.8183908 | 601.008183  |            |  |
| 163.6830222                 | 219.166431                                         | 149.2365548 | 414.1012313 |            |  |
| 177.3620027                 | 1.223202607                                        | 8.03E-05    | 0.0016506   | P4HA2      |  |
| 5                           | 132191838                                          | 132295315   | - 8502      |            |  |
| protein_coding              | prolyl 4-hydroxylase subunit alpha 2 [Source:HGNC  |             |             |            |  |
| Symbol;Acc:HGNC:8547]       | -                                                  | 383 332     | 517 158     | 192        |  |
| 173                         | 2.206004311                                        | 1.850305432 | 3.783347988 |            |  |
| 1.032637827                 | 1.388121524                                        | 0.946141344 |             |            |  |
| ENSG00000106049             | 973.4802865                                        | 928.3599156 | 1013.692719 |            |  |
| 665.0917737                 | 522.8032573                                        | 304.511583  | 971.8443069 |            |  |
| 497.4688713                 | 0.967589428                                        | 8.05E-05    | 0.0016506   | HIBADH     |  |
| 7                           | 27525442                                           | 27662995    | - 2323      |            |  |
| protein_coding              | 3-hydroxyisobutyrate dehydrogenase [Source:HGNC    |             |             |            |  |
| Symbol;Acc:HGNC:4907]       | -                                                  | 1073 1049   | 872 642     | 458        |  |
| 353                         | 22.61930183                                        | 21.39699175 | 23.35469079 |            |  |
| 15.35669865                 | 12.1189119                                         | 7.065721472 |             |            |  |
| ENSG00000138758             | 4300.369579                                        | 3307.226887 | 4243.094522 |            |  |

|                                                            |                                                                                |                                        |                |                        |
|------------------------------------------------------------|--------------------------------------------------------------------------------|----------------------------------------|----------------|------------------------|
| 3039.531564                                                | 2320.652887                                                                    | 1974.580775                            | 3950.230329    |                        |
| 2444.921742                                                | 0.692272034                                                                    | 8.05E-05                               | 0.0016506      | 11-Sep                 |
| 4                                                          | 76949703                                                                       | 77040384                               | +              | 9787                   |
| protein_coding                                             | septin 11 [Source:HGNC Symbol;Acc:HGNC:25589]                                  |                                        |                | -                      |
| 4740                                                       | 3737                                                                           | 3650                                   | 2934           | 2033                   |
| 18.09255703                                                | 23.20331964                                                                    | 16.65798876                            | 2289           | 23.71687349            |
| 10.87494884                                                |                                                                                |                                        |                | 12.76836093            |
| ENSG00000115361                                            | 30.84653284                                                                    | 8.849951531                            | 20.9248497     | 0                      |
| 0                                                          | 0                                                                              | 20.20711136                            | 0              | 6.769438563            |
| 8.10E-05                                                   | 0.001658585                                                                    | ACADL                                  | 2              | 210187939              |
| 210225491                                                  | -                                                                              | 4383                                   | protein_coding | acyl-CoA dehydrogenase |
| long chain [Source:HGNC Symbol;Acc:HGNC:88]                |                                                                                |                                        | -              | 34                     |
| 18                                                         | 0                                                                              | 0                                      | 0              | 0.379870991            |
| 0.255509988                                                | 0                                                                              | 0                                      | 0              | 0.108107287            |
| ENSG00000236552                                            | 1940.609816                                                                    | 2043.453809                            | 2079.697562    |                        |
| 2696.625992                                                | 2963.312786                                                                    | 3033.038883                            | 2021.253729    |                        |
| 2897.65922                                                 | -0.519848111                                                                   | 8.12E-05                               | 0.00166114     |                        |
| RPL13AP5                                                   | 10                                                                             | 96750288                               | 96750899       | +                      |
|                                                            | processed_pseudogene                                                           | ribosomal protein L13a                 | pseudogene 5   | 612                    |
| [Source:HGNC Symbol;Acc:HGNC:23736]                        |                                                                                | -                                      | 2139           | 2309                   |
| 2603                                                       | 2596                                                                           | 3516                                   | 171.1543912    | 178.7717747            |
| 181.8719675                                                | 236.3386713                                                                    | 260.7357764                            | 267.1335665    |                        |
| ENSG00000165119                                            | 13479.0276                                                                     | 12949.24908                            | 15133.3163     |                        |
| 11007.16526                                                | 9125.085674                                                                    | 7799.119608                            | 13853.86433    |                        |
| 9310.456847                                                | 0.573395511                                                                    | 8.24E-05                               | 0.001682333    | HNRNPK                 |
| 9                                                          | 83968083                                                                       | 83980616                               | -              | 5114                   |
| protein_coding                                             | heterogeneous nuclear ribonucleoprotein K [Source:HGNC Symbol;Acc:HGNC:5044]   |                                        |                | -                      |
| 9041                                                       | 142.2653325                                                                    | 135.5718148                            | 13018          | 10625                  |
| 115.4463638                                                | 96.08393493                                                                    | 82.20282894                            | 158.376372     | 7994                   |
| ENSG00000171943                                            | 686.7889812                                                                    | 512.4121937                            | 702.1449565    |                        |
| 427.8549884                                                | 277.3825142                                                                    | 221.6982346                            | 633.7820438    |                        |
| 308.9785791                                                | 1.037174051                                                                    | 8.25E-05                               | 0.001682333    |                        |
| SRGAP2C 1                                                  | 121184810                                                                      | 121392822                              | +              | 7311                   |
| protein_coding                                             | SLIT-ROBO Rho GTPase activating protein 2C [Source:HGNC Symbol;Acc:HGNC:30584] |                                        |                | -                      |
| 413                                                        | 243                                                                            | 257                                    | 5.070464882    | 3.752564974            |
| 5.140045949                                                | 3.138956602                                                                    | 2.043039907                            | 1.634509155    |                        |
| ENSG00000253500                                            | 1.814501932                                                                    | 0                                      | 0              | 13.46759043            |
| 14.83939377                                                | 75.91223598                                                                    | 0.604833977                            |                |                        |
| 34.73974006                                                | -5.780349687                                                                   | 8.26E-05                               | 0.001683632    |                        |
| AF121898.1                                                 | 8                                                                              | 87540835                               | 87755718       | -                      |
|                                                            | antisense                                                                      | "novel transcript, antisense to CNBD1" |                | 2910                   |
| 2                                                          | 0                                                                              | 0                                      | 13             | 13                     |
| 0                                                          | 0                                                                              | 0.248234652                            | 0.274598224    | 1.406114547            |
| ENSG00000183751                                            | 1149.486974                                                                    | 1367.317512                            | 1360.11523     |                        |
| 1717.635765                                                | 2006.742634                                                                    | 2383.471682                            | 1292.306572    |                        |
| 2035.950027                                                | -0.656346088                                                                   | 8.27E-05                               | 0.001683632    | TBL3                   |
| 16                                                         | 1972037                                                                        | 1982933                                | +              | 7139                   |
| transducin beta like 3 [Source:HGNC Symbol;Acc:HGNC:11587] |                                                                                |                                        | protein_coding | -                      |

|                        |                                                      |          |             |             |             |             |             |       |
|------------------------|------------------------------------------------------|----------|-------------|-------------|-------------|-------------|-------------|-------|
|                        | 1267                                                 | 1545     | 1170        | 1658        | 1758        | 2763        | 8.69096331  |       |
|                        | 10.25457209                                          |          | 10.19659868 |             | 12.90503503 |             | 15.13661793 |       |
|                        | 17.99593936                                          |          |             |             |             |             |             |       |
| ENSG00000170456        | 473.5850042                                          |          |             | 273.4635023 |             | 409.1970608 |             |       |
| 219.6253209            | 158.6673641                                          |          |             | 111.2804368 |             | 385.4151891 |             |       |
| 163.1910406            | 1.241575659                                          |          |             | 8.31E-05    |             | 0.001690392 |             |       |
| DENND5B 12             | 31382223                                             |          |             | 31591097    |             | -           | 11310       |       |
| protein_coding         | DENN domain containing 5B [Source:HGNC               |          |             |             |             |             |             |       |
| Symbol;Acc:HGNC:28338] | -                                                    |          |             | 522         | 309         | 352         | 212         | 139   |
| 129                    | 2.260146454                                          |          |             | 1.294560392 |             | 1.936363578 |             |       |
| 1.041562414            | 0.755439267                                          |          |             | 0.530344566 |             |             |             |       |
| ENSG00000188612        | 3570.032551                                          |          |             | 4074.517685 |             | 4738.315965 |             |       |
| 2791.935094            | 2894.823276                                          |          |             | 2712.999797 |             | 4127.622067 |             |       |
| 2799.919389            | 0.559725891                                          |          |             | 8.39E-05    |             | 0.001704665 |             | SUM02 |
| 17                     | 75165586                                             |          |             | 75182983    |             | -           | 3372        |       |
| protein_coding         | small ubiquitin-like modifier 2 [Source:HGNC         |          |             |             |             |             |             |       |
| Symbol;Acc:HGNC:11125] | -                                                    |          |             | 3935        | 4604        | 4076        | 2695        | 2536  |
| 3145                   | 57.14600229                                          |          |             | 64.6955173  |             | 75.20616722 |             |       |
| 44.41025299            | 46.22841927                                          |          |             | 43.36747152 |             |             |             |       |
| ENSG00000198732        | 1536.883136                                          |          |             | 1655.825931 |             | 2145.959586 |             |       |
| 1349.866949            | 779.6389186                                          |          |             | 833.3093177 |             | 1779.556218 |             |       |
| 987.6050617            | 0.849146443                                          |          |             | 8.44E-05    |             | 0.001710683 |             | SMOC1 |
| 14                     | 69854131                                             |          |             | 70032366    |             | +           | 4369        |       |
| protein_coding         | SPARC related modular calcium binding 1 [Source:HGNC |          |             |             |             |             |             |       |
| Symbol;Acc:HGNC:20318] | -                                                    |          |             | 1694        | 1871        | 1846        | 1303        | 683   |
| 966                    | 18.98716152                                          |          |             | 20.29168835 |             | 26.28793659 |             |       |
| 16.57198054            | 9.609173151                                          |          |             | 10.28078081 |             |             |             |       |
| ENSG00000105323        | 9966.151861                                          |          |             | 9734.061689 |             | 11286.63143 |             |       |
| 7597.792942            | 7418.555391                                          |          |             | 7369.525364 |             | 10328.94833 |             |       |
| 7461.957899            | 0.468963376                                          |          |             | 8.44E-05    |             | 0.001710683 |             |       |
| HNRNPUL1               | 19                                                   | 41262496 |             | 41307598    |             | +           | 6543        |       |
| protein_coding         | heterogeneous nuclear ribonucleoprotein U like       |          |             |             |             |             |             |       |
| 1 [Source:HGNC         | Symbol;Acc:HGNC:17011]                               |          |             |             |             |             |             |       |
| 7334                   | 6499                                                 | 8543     |             | 82.21514451 |             | 79.65310732 |             |       |
| 92.32183487            | 62.28393302                                          |          |             | 61.05440129 |             | 60.71059709 |             |       |
| ENSG00000177946        | 439.1094675                                          |          |             | 505.3322324 |             | 520.7962592 |             |       |
| 775.9404027            | 768.2240004                                          |          |             | 870.4027967 |             | 488.412653  |             |       |
| 804.8557332            | -0.72174185                                          |          |             | 8.50E-05    |             | 0.001720537 |             |       |
| CENPBD1 16             | 89969773                                             |          |             | 89972832    |             | -           | 3060        |       |
| protein_coding         | CENPB DNA-binding domain containing 1 [Source:HGNC   |          |             |             |             |             |             |       |
| Symbol;Acc:HGNC:28272] | -                                                    |          |             | 484         | 571         | 448         | 749         | 673   |
| 1009                   | 7.745556366                                          |          |             | 8.841808868 |             | 9.108847561 |             |       |
| 13.60104993            | 13.51888887                                          |          |             | 15.33206875 |             |             |             |       |
| ENSG00000127528        | 848.2796532                                          |          |             | 810.6555603 |             | 820.7191048 |             |       |
| 580.1423571            | 412.07855                                            |          |             | 469.2756406 |             | 826.5514394 |             |       |
| 487.1655159            | 0.762376631                                          |          |             | 8.54E-05    |             | 0.00172733  |             | KLF2  |
| 19                     | 16324817                                             |          |             | 16327874    |             | +           | 2018        |       |
| protein_coding         | Kruppel like factor 2 [Source:HGNC                   |          |             |             |             |             |             |       |
| Symbol;Acc:HGNC:6347]  | zf-C2H2                                              |          |             |             |             |             |             |       |
| 544                    | 22.68919735                                          |          |             | 935         | 916         | 706         | 560         | 361   |
|                        |                                                      |          |             | 21.50803589 |             | 21.76658944 |             |       |

|                                               |                                                    |             |                     |                |     |
|-----------------------------------------------|----------------------------------------------------|-------------|---------------------|----------------|-----|
| 15.41980596                                   | 10.9959663                                         | 12.53455026 |                     |                |     |
| ENSG00000178381                               | 362.9003864                                        | 459.3124845 | 373.1598196         |                |     |
| 671.3075847                                   | 714.5738844                                        | 660.7815087 | 398.4575635         |                |     |
| 682.2209926                                   | -0.774722211                                       | 8.65E-05    | 0.001747489         |                |     |
| ZFAND2A 7                                     | 1152071 1160759                                    | - 2281      | protein_coding zinc |                |     |
| finger AN1-type                               | containing 2A [Source:HGNC Symbol;Acc:HGNC:28073]  |             |                     |                |     |
| -                                             | 400 519                                            | 321 648     | 626 766             |                |     |
| 8.587433552                                   | 10.78123502                                        | 8.755613732 | 15.78562437         |                |     |
| 16.86927461                                   | 15.61473084                                        |             |                     |                |     |
| ENSG00000104415                               | 2076.697461                                        | 1382.362429 | 2111.084836         |                |     |
| 373.9846267                                   | 456.5967313                                        | 89.71446071 | 1856.714909         |                |     |
| 306.7652729                                   | 2.598369437                                        | 8.71E-05    | 0.001754571         | WISP1          |     |
| 8                                             | 133191039                                          | 133231690   | + 5190              |                |     |
| protein_coding                                | WNT1 inducible signaling pathway protein 1         |             |                     |                |     |
| [Source:HGNC Symbol;Acc:HGNC:12769]           |                                                    | -           | 2289 1562           | 1816           |     |
| 361                                           | 400 104                                            | 21.5976808  | 14.26067599         |                |     |
| 21.7698448                                    | 3.865021265                                        | 4.737399323 | 0.931744847         |                |     |
| ENSG00000151623                               | 123.3861314                                        | 114.1643748 | 82.53690714         |                |     |
| 397.811902                                    | 220.3079228                                        | 206.1707318 | 106.6958044         |                |     |
| 274.7635189                                   | -1.361262036                                       | 8.71E-05    | 0.001754571         | NR3C2          |     |
| 4                                             | 148078762                                          | 148444698   | - 6607              |                |     |
| protein_coding                                | nuclear receptor subfamily 3 group C member 2      |             |                     |                |     |
| [Source:HGNC Symbol;Acc:HGNC:7979]            |                                                    | ESR-like    | 136 129             |                |     |
| 71                                            | 384 193                                            | 239         | 1.00800639          | 0.925149342    |     |
| 0.668591558                                   | 3.229527308                                        | 1.795561821 | 1.681994658         |                |     |
| ENSG00000228526                               | 118.8498765                                        | 193.8139385 | 242.9607548         |                |     |
| 19.6834014                                    | 87.89487077                                        | 17.25278091 | 185.20819           |                |     |
| 41.61035103                                   | 2.164300867                                        | 8.82E-05    | 0.001774048         |                |     |
| MIR34AHG                                      | 1 9148011                                          | 9198906 -   | 8702                | lincRNA MIR34A |     |
| host gene [Source:HGNC Symbol;Acc:HGNC:51913] |                                                    |             | -                   | 131 219        |     |
| 209                                           | 19 77                                              | 20          | 0.737192487         | 1.192481024    |     |
| 1.494287122                                   | 0.121323957                                        | 0.543899934 | 0.106866586         |                |     |
| ENSG00000069399                               | 389.2106644                                        | 389.3978674 | 716.0948563         |                |     |
| 143.9996208                                   | 289.9389244                                        | 200.9948975 | 498.2344627         |                |     |
| 211.6444809                                   | 1.235060144                                        | 8.85E-05    | 0.001778389         | BCL3           |     |
| 19                                            | 44747705                                           | 44760044    | + 3242              |                |     |
| protein_coding                                | B cell CLL/lymphoma 3 [Source:HGNC                 |             |                     |                |     |
| Symbol;Acc:HGNC:998]                          |                                                    | -           | 429 440             | 616 139        | 254 |
| 233                                           | 6.479969552                                        | 6.430816343 | 11.8215534          |                |     |
| 2.382395354                                   | 4.81579583                                         | 3.341749784 |                     |                |     |
| ENSG00000211459                               | 22400.9336                                         | 30353.56376 | 17439.69973         |                |     |
| 46647.58939                                   | 60275.33449                                        | 96296.39662 | 23398.0657          |                |     |
| 67739.7735                                    | -1.533606893                                       | 8.95E-05    | 0.001796359         | MT-            |     |
| RNR1 MT                                       | 648 1601                                           | + 954       | Mt_rRNA             |                |     |
| mitochondrially                               | encoded 12S RNA [Source:HGNC Symbol;Acc:HGNC:7470] |             |                     |                |     |
| -                                             | 24691 34298                                        | 15002 45028 | 52804 111630        |                |     |
| 1267.415425                                   | 1703.518531                                        | 978.3801504 | 2622.686171         |                |     |
| 3402.24675                                    | 5440.810102                                        |             |                     |                |     |
| ENSG00000167657                               | 1544.141144                                        | 1809.815088 | 1615.863393         |                |     |
| 2045.001809                                   | 2656.251484                                        | 3858.58445  | 1656.606542         |                |     |

|                 |                                                                                          |             |             |             |
|-----------------|------------------------------------------------------------------------------------------|-------------|-------------|-------------|
| 2853.279248     | -0.78470685                                                                              | 9.04E-05    | 0.001813247 | DAPK3       |
| 19              | 3958453                                                                                  | 3971123     | -           | 3549        |
| protein_coding  | associated protein kinase 3 [Source:HGNC Symbol;Acc:HGNC:2676]                           |             |             | death       |
| 1702            | 2045                                                                                     | 1390        | 1974        | 2327        |
| 27.30321279     | 24.36776218                                                                              | 30.90673957 | 4473        | 23.48454984 |
| 58.60354893     |                                                                                          |             |             | 40.3030343  |
| ENSG00000172638 | 1240.21207                                                                               | 1223.948297 | 1510.076653 |             |
| 601.8976955     | 988.5319232                                                                              | 698.7376267 | 1324.745673 |             |
| 763.0557485     | 0.796352205                                                                              | 9.09E-05    | 0.001821688 | EFEMP2      |
| 11              | 65866441                                                                                 | 65873592    | -           | 5397        |
| protein_coding  | EGF containing fibulin extracellular matrix protein 2 [Source:HGNC Symbol;Acc:HGNC:3219] |             |             |             |
| 581             | 866                                                                                      | 810         | 12.40351511 | 12.14216703 |
| 14.97488789     | 5.981853298                                                                              | 9.863086323 | 6.978524683 |             |
| ENSG00000263465 | 1036.080603                                                                              | 1202.708413 | 979.9804609 |             |
| 1516.657877     | 1727.077136                                                                              | 1676.107665 | 1072.923159 |             |
| 1639.947559     | -0.611450091                                                                             | 9.11E-05    | 0.001822994 | SRSF8       |
| 11              | 95067197                                                                                 | 95071224    | +           | 4028        |
| protein_coding  | serine and arginine rich splicing factor 8 [Source:HGNC Symbol;Acc:HGNC:16988]           |             |             |             |
| 1464            | 1513                                                                                     | 1943        | 13.88370335 | 15.98661204 |
| 13.0210186      | 20.19592078                                                                              | 23.08855888 | 22.42922961 |             |
| ENSG00000182718 | 16401.28296                                                                              | 17152.97606 | 24976.1331  |             |
| 12295.91007     | 13865.70124                                                                              | 11456.70916 | 19510.13071 |             |
| 12539.44015     | 0.637707004                                                                              | 9.12E-05    | 0.001822994 | ANXA2       |
| 15              | 60347134                                                                                 | 60402883    | -           | 8824        |
| protein_coding  | annexin A2 [Source:HGNC Symbol;Acc:HGNC:537]                                             |             |             |             |
| 18078           | 19382                                                                                    | 21485       | 11869       | 12147       |
| 104.078142      | 151.4874675                                                                              | 74.74130459 | 13281       | 100.3260159 |
| 69.98360263     |                                                                                          |             |             | 84.61568844 |
| ENSG00000087995 | 909.9727189                                                                              | 1097.39399  | 935.8057782 |             |
| 1380.946004     | 1739.633546                                                                              | 1488.914992 | 981.0574956 |             |
| 1536.498181     | -0.646572725                                                                             | 9.16E-05    | 0.001827896 |             |
| METTL2A         | 17                                                                                       | 62423867    | 62450822    | +           |
| protein_coding  | methyltransferase like 2A [Source:HGNC Symbol;Acc:HGNC:25755]                            |             |             |             |
| 1726            | 12.78083512                                                                              | 15.28895286 | 13.03263831 | 1524        |
| 19.27399796     | 24.37597202                                                                              | 20.88341048 |             |             |
| ENSG00000184640 | 6208.31836                                                                               | 6127.70644  | 7416.696726 |             |
| 4419.441599     | 4855.906237                                                                              | 4596.140833 | 6584.240509 |             |
| 4623.829557     | 0.509780417                                                                              | 9.32E-05    | 0.001858711 | 9-Sep       |
| 17              | 77280569                                                                                 | 77500596    | +           | 12844       |
| protein_coding  | septin 9 [Source:HGNC Symbol;Acc:HGNC:7323]                                              |             |             |             |
| 6843            | 6924                                                                                     | 6380        | 4266        | 4254        |
| 25.5436646      | 30.90489187                                                                              | 18.45578821 | 5328        | 26.09005092 |
| 19.28834376     |                                                                                          |             |             | 20.35844246 |
| ENSG00000197043 | 2391.513546                                                                              | 2184.168038 | 3281.713928 |             |
| 1711.419954     | 1753.331448                                                                              | 1362.969692 | 2619.131837 |             |
| 1609.240364     | 0.70262802                                                                               | 9.36E-05    | 0.001863955 | ANXA6       |
| 5               | 151100712                                                                                | 151157882   | -           | 5427        |

|                                                                         |                                                                                    |             |             |             |             |                      |
|-------------------------------------------------------------------------|------------------------------------------------------------------------------------|-------------|-------------|-------------|-------------|----------------------|
| protein_coding                                                          | annexin A6 [Source:HGNC Symbol;Acc:HGNC:544]                                       | -           |             |             |             |                      |
| 2636                                                                    | 2468                                                                               | 2823        | 1652        | 1536        | 1580        | 23.78560859          |
| 21.54823854                                                             |                                                                                    | 32.36368036 |             | 16.91462076 |             | 17.39717589          |
| 13.53718249                                                             |                                                                                    |             |             |             |             |                      |
| ENSG00000224321                                                         | 14.51601546                                                                        |             | 28.3198449  |             | 15.11239145 | 0                    |
| 0                                                                       | 0                                                                                  | 19.31608393 | 0           |             | 6.706246754 |                      |
| 9.41E-05                                                                | 0.001872126                                                                        |             | RPL12P14    |             | 1           | 15792796             |
| 15793285                                                                | +                                                                                  | 490         |             |             |             | processed_pseudogene |
| ribosomal protein L12 pseudogene 14 [Source:HGNC Symbol;Acc:HGNC:36495] | -                                                                                  | 16          | 32          | 13          | 0           | 0                    |
| 0                                                                       | 1.599015178                                                                        | 3.094427693 |             | 1.650646665 |             | 0                    |
| 0                                                                       | 0                                                                                  |             |             |             |             |                      |
| ENSG00000165801                                                         | 1691.115801                                                                        |             | 1579.716348 |             | 2218.034068 |                      |
| 1079.479172                                                             | 1299.0177                                                                          |             | 1007.562405 |             | 1829.622072 |                      |
| 1128.686426                                                             | 0.696877518                                                                        |             | 9.43E-05    |             | 0.001873498 |                      |
| ARHGEF40                                                                | 14                                                                                 | 21070270    |             | 21090240    | +           | 8189                 |
| protein_coding                                                          | Rho guanine nucleotide exchange factor 40 [Source:HGNC Symbol;Acc:HGNC:25516]      | -           |             | 1864        | 1785        | 1908                 |
| 1042                                                                    | 1138                                                                               | 1168        | 11.14663347 |             | 10.32841763 |                      |
| 14.4962058                                                              | 7.070479892                                                                        |             | 8.541983951 |             | 6.63197667  |                      |
| ENSG00000149177                                                         | 796.5663481                                                                        |             | 610.6466557 |             | 681.2201068 |                      |
| 343.9415403                                                             | 479.4265678                                                                        |             | 304.511583  |             | 696.1443702 |                      |
| 375.959897                                                              | 0.890938793                                                                        |             | 9.46E-05    |             | 0.001878651 | PTPRJ                |
| 11                                                                      | 47980558                                                                           |             | 48170841    |             | +           | 9620                 |
| protein_coding                                                          | "protein tyrosine phosphatase, receptor type J [Source:HGNC Symbol;Acc:HGNC:9673]" | -           |             | 878         | 690         | 586                  |
| 332                                                                     | 420                                                                                | 353         | 4.469388708 |             | 3.398603181 |                      |
| 3.789914309                                                             | 1.917675215                                                                        |             | 2.683623452 |             | 1.706202805 |                      |
| ENSG00000131174                                                         | 1542.326642                                                                        |             | 1836.364943 |             | 2138.984636 |                      |
| 1320.859831                                                             | 1099.256631                                                                        |             | 797.9411169 |             | 1839.225407 |                      |
| 1072.685859                                                             | 0.778221615                                                                        |             | 9.55E-05    |             | 0.001894537 | COX7B                |
| X                                                                       | 77899438                                                                           |             | 77907373    |             | +           | 3024                 |
| protein_coding                                                          | cytochrome c oxidase subunit 7B [Source:HGNC Symbol;Acc:HGNC:2291]                 | -           |             | 1700        | 2075        | 963                  |
| 925                                                                     | 27.52934118                                                                        |             | 32.51342755 |             | 37.85671127 |                      |
| 23.42828193                                                             | 19.57455332                                                                        |             | 14.22299194 |             |             |                      |
| ENSG00000142173                                                         | 32765.36864                                                                        |             | 37224.66613 |             | 66339.91098 |                      |
| 16321.68364                                                             | 19471.5676                                                                         |             | 11951.86397 |             | 45443.31525 |                      |
| 15915.0384                                                              | 1.513682791                                                                        |             | 9.67E-05    |             | 0.001914573 | COL6A2               |
| 21                                                                      | 46098097                                                                           |             | 46132849    |             | +           | 5386                 |
| protein_coding                                                          | collagen type VI alpha 2 chain [Source:HGNC Symbol;Acc:HGNC:2212]                  | -           |             | 36115       | 42062       | 17058                |
| 13855                                                                   | 328.3597782                                                                        |             | 370.0411405 |             | 659.212661  |                      |
| 162.5414397                                                             | 194.6745239                                                                        |             | 119.6110215 |             |             |                      |
| ENSG00000197019                                                         | 545.2578306                                                                        |             | 731.0059965 |             | 942.7807281 |                      |
| 1044.256243                                                             | 1402.893457                                                                        |             | 1576.041536 |             | 739.6815184 |                      |
| 1341.063745                                                             | -0.859955357                                                                       |             | 9.72E-05    |             | 0.001922541 |                      |
| SERTAD1                                                                 | 19                                                                                 | 40421592    | 40426025    |             | -           | 2114                 |
| protein_coding                                                          | SERTA domain containing 1 [Source:HGNC Symbol;Acc:HGNC:17932]                      | -           |             | 601         | 826         | 811                  |
|                                                                         |                                                                                    |             |             |             | 1008        | 1229                 |

|                                                      |                                                        |             |                |                    |
|------------------------------------------------------|--------------------------------------------------------|-------------|----------------|--------------------|
| 1827                                                 | 13.92188919                                            | 18.51405311 | 23.8683676     |                    |
| 26.49522383                                          | 35.73503898                                            | 40.18505643 |                |                    |
| ENSG00000140795                                      | 15.42326642                                            | 38.93978674 | 6.974949899    | 0                  |
| 0                                                    | 0                                                      | 20.44600102 | 0              | 6.790471523        |
| 9.73E-05                                             | 0.001922541                                            | MYLK3       | 16             | 46703369           |
| 46790407                                             | -                                                      | 9522        | protein_coding | myosin light chain |
| kinase 3 [Source:HGNC Symbol;Acc:HGNC:29826]         | -                                                      | 17          | 44             |                    |
| 6                                                    | 0                                                      | 0           | 0.087427775    | 0.21895302         |
| 0.039203958                                          | 0                                                      | 0           | 0              |                    |
| ENSG00000127580                                      | 463.6052436                                            | 708.8811176 | 594.0332331    |                    |
| 895.0767796                                          | 1005.654301                                            | 1160.249516 | 588.8398648    |                    |
| 1020.326865                                          | -0.793425767                                           | 9.75E-05    | 0.001924013    | WDR24              |
| 16                                                   | 684622                                                 | 690444      | -              | 3651               |
| repeat domain 24 [Source:HGNC Symbol;Acc:HGNC:20852] | -                                                      | 511         | 864            | 881                |
| 801                                                  | 511                                                    | 864         | 881            | 1345               |
| 10.39554168                                          | 8.707949741                                            | 13.14964272 | 14.83240023    | 6.853899796        |
| 17.12937312                                          |                                                        |             |                |                    |
| ENSG00000131747                                      | 12303.23035                                            | 8156.115331 | 11707.45341    |                    |
| 4541.685882                                          | 2765.8347                                              | 1403.513727 | 10722.26636    |                    |
| 2903.678103                                          | 1.884729788                                            | 9.76E-05    | 0.001924013    | TOP2A              |
| 17                                                   | 40388516                                               | 40417950    | -              | 6437               |
| protein_coding                                       | DNA topoisomerase II alpha [Source:HGNC                |             |                |                    |
| Symbol;Acc:HGNC:11989]                               | -                                                      | 13561       | 9216           | 10071              |
| 1627                                                 | 103.1660708                                            | 67.83993104 | 97.34102912    | 4384               |
| 37.8441783                                           | 23.1375444                                             | 11.75262995 |                | 2423               |
| ENSG00000156876                                      | 871.8681783                                            | 864.6402646 | 660.2952571    |                    |
| 506.588594                                           | 406.3710908                                            | 481.3525873 | 798.9345667    |                    |
| 464.7707574                                          | 0.781846987                                            | 9.77E-05    | 0.001925003    | SASS6              |
| 1                                                    | 100083563                                              | 100132955   | -              | 3972               |
| protein_coding                                       | SAS-6 centriolar assembly protein [Source:HGNC         |             |                |                    |
| Symbol;Acc:HGNC:25403]                               | -                                                      | 961         | 977            | 568                |
| 558                                                  | 11.8479396                                             | 11.65498623 | 8.897048182    | 489                |
| 6.840875128                                          | 5.509194666                                            | 6.532147416 |                | 356                |
| ENSG00000196739                                      | 1254.728086                                            | 1026.594378 | 1035.78006     |                    |
| 731.3937574                                          | 703.1589662                                            | 659.0562306 | 1105.700841    |                    |
| 697.8696514                                          | 0.664575399                                            | 9.92E-05    | 0.001949732    |                    |
| COL27A1                                              | 9                                                      | 114155560   | 114312511      | +                  |
| protein_coding                                       | collagen type XXVII alpha 1 chain [Source:HGNC         |             |                |                    |
| Symbol;Acc:HGNC:22986]                               | -                                                      | 1383        | 1160           | 891                |
| 764                                                  | 4.84167061                                             | 3.929423213 | 3.9630443      | 706                |
| 2.804536658                                          | 2.706901475                                            | 2.539620085 |                | 616                |
| ENSG00000142546                                      | 2460.46462                                             | 3561.220496 | 3185.227121    |                    |
| 3649.717008                                          | 5977.992704                                            | 5815.912443 | 3068.970746    |                    |
| 5147.874052                                          | -0.746277429                                           | 9.92E-05    | 0.001949732    | NOSIP              |
| 19                                                   | 49555711                                               | 49590262    | -              | 4248               |
| protein_coding                                       | nitric oxide synthase interacting protein [Source:HGNC |             |                |                    |
| Symbol;Acc:HGNC:17946]                               | -                                                      | 2712        | 4024           | 2740               |
| 6742                                                 | 31.26323108                                            | 44.88486309 | 40.13034574    | 3523               |
| 46.08294004                                          | 75.77839909                                            | 73.79641394 |                | 5237               |
| ENSG00000102978                                      | 2610.161029                                            | 3029.338409 | 2819.042251    |                    |



|                                      |                                              |             |             |        |
|--------------------------------------|----------------------------------------------|-------------|-------------|--------|
| 3643.501197                          | 4202.972911                                  | 4360.640374 | 2819.513896 |        |
| 4069.038161                          | -0.529299516                                 | 0.00010165  | 0.001995653 | POLR2C |
| 16                                   | 57462387                                     | 57472010    | + 3940      |        |
| protein_coding                       | RNA polymerase II subunit C [Source:HGNC     |             |             |        |
| Symbol;Acc:HGNC:9189]                | -                                            | 2877 3423   | 2425 3517   | 3682   |
| 5055                                 | 35.75792619                                  | 41.16585293 | 38.2932624  |        |
| 49.60074392                          | 57.44271025                                  | 59.65625085 |             |        |
| ENSG00000183255                      | 9366.458973                                  | 10031.42006 | 11051.80812 |        |
| 7305.649826                          | 7738.173103                                  | 6045.374429 | 10149.89572 |        |
| 7029.732453                          | 0.530019787                                  | 0.000102265 | 0.002005507 |        |
| PTTG1IP 21                           | 44849585                                     | 44873903    | - 3537      |        |
| protein_coding                       | PTTG1 interacting protein [Source:HGNC       |             |             |        |
| Symbol;Acc:HGNC:13524]               | -                                            | 10324 11335 | 9507 7052   | 6779   |
| 7008                                 | 142.9359984                                  | 151.8493389 | 167.2304201 |        |
| 110.7871238                          | 117.8088548                                  | 92.12766234 |             |        |
| ENSG00000111110                      | 204.1314673                                  | 159.2991276 | 166.2363059 |        |
| 88.05732207                          | 37.66923033                                  | 21.56597613 | 176.5556336 |        |
| 49.09750951                          | 1.850906489                                  | 0.000102399 | 0.002005902 | PPM1H  |
| 12                                   | 62643982                                     | 62935037    | - 7063      |        |
| protein_coding                       | "protein phosphatase, Mg2+/Mn2+ dependent 1H |             |             |        |
| [Source:HGNC Symbol;Acc:HGNC:18583]" | -                                            |             | 225 180     | 143    |
| 85                                   | 33 25                                        | 1.55999065  | 1.207562839 |        |
| 1.259660984                          | 0.668716075                                  | 0.287191838 | 0.164581805 |        |
| ENSG00000161381                      | 265.824533                                   | 106.1994184 | 116.249165  |        |
| 64.23004668                          | 5.707459141                                  | 8.626390453 | 162.7577055 |        |
| 26.18796543                          | 2.63828709                                   | 0.000103629 | 0.002027761 | PLXDC1 |
| 17                                   | 39063303                                     | 39154394    | - 9277      |        |
| protein_coding                       | plexin domain containing 1 [Source:HGNC      |             |             |        |
| Symbol;Acc:HGNC:20945]               | -                                            | 293 120     | 100 62      | 5      |
| 10                                   | 1.546638253                                  | 0.612914831 | 0.67065519  |        |
| 0.371360901                          | 0.033129113                                  | 0.050121431 |             |        |
| ENSG00000178202                      | 3876.683378                                  | 2647.905498 | 3581.636773 |        |
| 2600.280922                          | 1763.604875                                  | 1479.425963 | 3368.741883 |        |
| 1947.770586                          | 0.790547253                                  | 0.00010548  | 0.002061688 | KDEL2  |
| 11                                   | 108472105                                    | 108498432   | - 4993      |        |
| protein_coding                       | KDEL motif containing 2 [Source:HGNC         |             |             |        |
| Symbol;Acc:HGNC:28496]               | -                                            | 4273 2992   | 3081 2510   | 1545   |
| 1715                                 | 41.90829674                                  | 28.39399254 | 38.39166779 |        |
| 27.93342564                          | 19.0201649                                   | 15.97105394 |             |        |
| ENSG00000189320                      | 318.4450891                                  | 377.0079352 | 146.4739479 |        |
| 640.2285298                          | 632.3864728                                  | 574.5176042 | 280.6423241 |        |
| 615.7108689                          | -1.129786481                                 | 0.000105694 | 0.002063606 |        |
| FAM180A 7                            | 135728348                                    | 135748846   | - 2526      |        |
| protein_coding                       | family with sequence similarity 180 member A |             |             |        |
| [Source:HGNC Symbol;Acc:HGNC:33773]  | -                                            |             | 351 426     | 126    |
| 618                                  | 554 666                                      | 6.804597696 | 7.99102876  |        |
| 3.103444946                          | 13.59462313                                  | 13.48105184 | 12.25947581 |        |
| ENSG00000265763                      | 7.258007728                                  | 12.38993214 | 41.8496994  | 0      |
| 0                                    | 0 20.49921309                                | 0           | 6.785352663 |        |
| 0.000106021                          | 0.002067707                                  | ZNF488 10   | 47365496    |        |

|                                                |                                                        |           |                |                     |      |        |
|------------------------------------------------|--------------------------------------------------------|-----------|----------------|---------------------|------|--------|
| 47384273                                       | -                                                      | 3496      | protein_coding | zinc finger protein |      |        |
| 488                                            | [Source:HGNC Symbol;Acc:HGNC:23535]                    | zf-C2H2   | 8              | 14                  | 36   |        |
| 0                                              | 0                                                      | 0         | 0.11205913     | 0.189750554         |      |        |
| 0.640675215                                    | 0                                                      | 0         | 0              |                     |      |        |
| ENSG00000136143                                | 919.9524795                                            |           | 831.8954439    | 924.1808617         |      |        |
| 613.293349                                     | 489.6999943                                            |           | 545.1878766    | 892.009595          |      |        |
| 549.39374                                      | 0.698601279                                            |           | 0.000106414    | 0.002071511         |      | SUCLA2 |
| 13                                             | 47745736                                               |           | 48037968       | -                   | 8928 |        |
| protein_coding                                 | succinate-CoA ligase ADP-forming beta subunit          |           |                |                     |      |        |
| [Source:HGNC Symbol;Acc:HGNC:11448]            | -                                                      |           | 1014           | 940                 | 795  |        |
| 592                                            | 429                                                    | 632       | 5.561762723    | 4.988846171         |      |        |
| 5.540127934                                    | 3.684508551                                            |           | 2.953591781    | 3.29150042          |      |        |
| ENSG00000259863                                | 54.43505796                                            |           | 56.6396898     | 72.07448229         |      |        |
| 16.57549592                                    | 5.707459141                                            |           | 6.038473317    | 61.04974335         |      |        |
| 9.440476125                                    | 2.695002142                                            |           | 0.000106451    | 0.002071511         |      |        |
| SH3RF3-AS1                                     | 2                                                      | 109127327 | 109128930      | -                   | 1604 |        |
| lincRNA                                        | SH3RF3 antisense RNA 1 [Source:HGNC                    |           |                |                     |      |        |
| Symbol;Acc:HGNC:44168]                         | -                                                      | 60        | 64             | 62                  | 16   | 5      |
| 7                                              | 1.83178952                                             |           | 1.890610436    | 2.404884217         |      |        |
| 0.554278027                                    | 0.191607719                                            |           | 0.202919925    |                     |      |        |
| ENSG00000112559                                | 1650.289507                                            |           | 1308.022836    | 2027.385437         |      |        |
| 265.2079347                                    | 504.5393881                                            |           | 97.47821212    | 1661.89926          |      |        |
| 289.0751783                                    | 2.524303276                                            |           | 0.000107105    | 0.002081958         |      | MDFI   |
| 6                                              | 41636882                                               |           | 41654246       | +                   | 2523 |        |
| protein_coding                                 | MyoD family inhibitor [Source:HGNC                     |           |                |                     |      |        |
| Symbol;Acc:HGNC:6967]                          | -                                                      | 1819      | 1478           | 1744                | 256  | 442    |
| 113                                            | 35.30564354                                            |           | 27.75770938    | 43.00669577         |      |        |
| 5.638125757                                    | 10.76842975                                            |           | 2.08253453     |                     |      |        |
| ENSG00000087253                                | 284.8768033                                            |           | 334.5281679    | 466.1591516         |      |        |
| 159.5391482                                    | 204.3270372                                            |           | 127.6705787    | 361.8547076         |      |        |
| 163.8455881                                    | 1.144376246                                            |           | 0.000107861    | 0.002094356         |      | LPCAT2 |
| 16                                             | 55508998                                               |           | 55586670       | +                   | 7439 |        |
| protein_coding                                 | lysophosphatidylcholine acyltransferase 2 [Source:HGNC |           |                |                     |      |        |
| Symbol;Acc:HGNC:26032]                         | -                                                      | 314       | 378            | 401                 | 154  | 179    |
| 148                                            | 2.067015689                                            |           | 2.407707258    | 3.35379614          |      |        |
| 1.150318769                                    | 1.479060138                                            |           | 0.925077621    |                     |      |        |
| ENSG00000185896                                | 5025.263101                                            |           | 5061.287281    | 6437.878757         |      |        |
| 4040.27713                                     | 3760.074082                                            |           | 3411.737424    | 5508.143046         |      |        |
| 3737.362879                                    | 0.559418707                                            |           | 0.000108163    | 0.002097914         |      | LAMP1  |
| 13                                             | 113297241                                              |           | 113323672      | +                   | 5739 |        |
| protein_coding                                 | lysosomal associated membrane protein 1 [Source:HGNC   |           |                |                     |      |        |
| Symbol;Acc:HGNC:6499]                          | -                                                      | 5539      | 5719           | 5538                | 3900 | 3294   |
| 3955                                           | 47.26327632                                            |           | 47.21829625    | 60.0376346          |      |        |
| 37.76073385                                    | 35.28049991                                            |           | 32.04359848    |                     |      |        |
| ENSG00000072778                                | 4757.624066                                            |           | 5745.388534    | 5412.561122         |      |        |
| 3395.904726                                    | 4000.928858                                            |           | 3698.133587    | 5305.191241         |      |        |
| 3698.32239                                     | 0.520596233                                            |           | 0.000108487    | 0.002101887         |      | ACADVL |
| 17                                             | 7217125                                                | 7225273   | +              | 4865                |      |        |
| CoA dehydrogenase very long chain [Source:HGNC |                                                        |           |                |                     |      |        |
| Symbol;Acc:HGNC:92]                            |                                                        |           |                |                     |      |        |
| -                                              | 5244                                                   | 6492      | 4656           | 3278                | 3505 | 4287   |

|                                                 |                                                     |             |                |             |
|-------------------------------------------------|-----------------------------------------------------|-------------|----------------|-------------|
| 52.78475644                                     | 63.22984357                                         | 59.54385846 | 37.44019899    |             |
| 44.28458079                                     | 40.97336731                                         |             |                |             |
| ENSG00000110697                                 | 1528.717878                                         | 1333.687696 | 1755.362391    |             |
| 1054.615928                                     | 1010.220268                                         | 879.0291871 | 1539.255988    |             |
| 981.288461                                      | 0.649390584                                         | 0.000108854 | 0.002106687    |             |
| PITPNM1 11                                      | 67491768                                            | 67506263    | - 6449         |             |
| protein_coding                                  | phosphatidylinositol transfer protein               |             | membrane       |             |
| associated 1 [Source:HGNC Symbol;Acc:HGNC:9003] | -                                                   |             | 1685 1507      |             |
| 1510                                            | 1018 885                                            | 1019        | 12.79487984    | 11.07254149 |
| 14.56771435                                     | 8.771370275                                         | 8.435255738 | 7.34704712     |             |
| ENSG00000124225                                 | 2931.327871                                         | 3072.703172 | 5196.337675    |             |
| 1797.405339                                     | 2185.956851                                         | 2468.010309 | 3733.456239    |             |
| 2150.457499                                     | 0.795252037                                         | 0.00010955  | 0.002116514    | PMEPA1      |
| 20                                              | 57648392                                            | 57711536    | - 5619         |             |
| protein_coding                                  | "prostate transmembrane protein, androgen induced 1 |             |                |             |
| [Source:HGNC Symbol;Acc:HGNC:14107]"            | -                                                   |             | 3231 3472 4470 |             |
| 1735                                            | 1915 2861                                           | 28.15831153 | 29.27838553    |             |
| 49.49431724                                     | 17.15744007                                         | 20.9487014  | 23.67499216    |             |
| ENSG00000158483                                 | 302.1145717                                         | 258.4185847 | 261.5606212    |             |
| 405.0636815                                     | 546.7745857                                         | 584.8692727 | 274.0312592    |             |
| 512.2358466                                     | -0.902451796                                        | 0.000109601 | 0.002116514    |             |
| FAM86C1 11                                      | 71787510                                            | 71801236    | + 2972         |             |
| protein_coding                                  | family with sequence similarity 86 member C1        |             |                |             |
| [Source:HGNC Symbol;Acc:HGNC:25561]             | -                                                   |             | 333 292 225    |             |
| 391                                             | 479 678                                             | 5.486862942 | 4.655437357    |             |
| 4.71021314                                      | 7.310380731                                         | 9.906815353 | 10.60747231    |             |
| ENSG00000188549                                 | 522.5765564                                         | 284.9684393 | 396.4096526    |             |
| 202.0138565                                     | 157.5258723                                         | 201.8575366 | 401.3182161    |             |
| 187.1324218                                     | 1.09931444                                          | 0.000110178 | 0.002125336    | CCDC9B      |
| 15                                              | 40331452                                            | 40340967    | - 7510         |             |
| protein_coding                                  | coiled-coil domain containing 9B [Source:HGNC       |             |                |             |
| Symbol;Acc:HGNC:33488]                          | -                                                   | 576 322     | 341 195 138    |             |
| 234                                             | 3.755875865                                         | 2.031619513 | 2.825018451    |             |
| 1.442801941                                     | 1.129500713                                         | 1.448795    |                |             |
| ENSG00000170185                                 | 767.5343172                                         | 707.9961225 | 661.4577488    |             |
| 1081.551109                                     | 1122.086467                                         | 1095.551588 | 712.3293962    |             |
| 1099.729721                                     | -0.625834101                                        | 0.000111442 | 0.002145716    | USP38       |
| 4                                               | 143184917                                           | 143223830   | + 7787         |             |
| protein_coding                                  | ubiquitin specific peptidase 38 [Source:HGNC        |             |                |             |
| Symbol;Acc:HGNC:20067]                          | -                                                   | 846 800     | 569 1044 983   |             |
| 1270                                            | 5.320211185                                         | 4.867951617 | 4.546204194    |             |
| 7.449761472                                     | 7.75944579                                          | 7.58341048  |                |             |
| ENSG00000179833                                 | 743.0385411                                         | 710.651108  | 564.9709418    |             |
| 1078.443203                                     | 1050.172482                                         | 1102.4527   | 672.8868636    |             |
| 1077.022795                                     | -0.677415093                                        | 0.000111516 | 0.002145716    |             |
| SERTAD2 2                                       | 64631621                                            | 64751005    | - 6274         |             |
| protein_coding                                  | SERTA domain containing 2 [Source:HGNC              |             |                |             |
| Symbol;Acc:HGNC:30784]                          | -                                                   | 819 803     | 486 1041 920   |             |
| 1278                                            | 6.392460762                                         | 6.06453451  | 4.819462457    |             |
| 9.219731186                                     | 9.013442098                                         | 9.471469336 |                |             |

|                         |                                                    |                                 |              |        |
|-------------------------|----------------------------------------------------|---------------------------------|--------------|--------|
| ENSG00000125304         | 2987.577431                                        | 2456.746545                     | 3156.164829  |        |
| 2215.936611             | 1690.549398                                        | 1469.936933                     | 2866.829602  |        |
| 1792.14098              | 0.67785671                                         | 0.000111598                     | 0.002145716  | TM9SF2 |
| 13                      | 99446311                                           | 99564006                        | + 5524       |        |
| protein_coding          | transmembrane 9                                    | superfamily member 2            | [Source:HGNC |        |
| Symbol;Acc:HGNC:11865]  | -                                                  | 3293 2776                       | 2715 2139    | 1481   |
| 1704                    | 29.19219453                                        | 23.81180036                     | 30.57898111  |        |
| 21.51637765             | 16.47967903                                        | 14.34322921                     |              |        |
| ENSG00000168159         | 2261.776658                                        | 2718.70511                      | 2567.944055  |        |
| 2820.942212             | 4838.78386                                         | 4973.114096                     | 2516.141941  |        |
| 4210.946722             | -0.743023584                                       | 0.000111928                     | 0.002148175  | RNF187 |
| 1                       | 228487061                                          | 228495766                       | + 3285       |        |
| protein_coding          | ring finger protein 187                            | [Source:HGNC                    |              |        |
| Symbol;Acc:HGNC:27146]  | -                                                  | 2493 3072                       | 2209 2723    | 4239   |
| 5765                    | 37.16341269                                        | 44.31107419                     | 41.83764096  |        |
| 46.06004003             | 79.31866625                                        | 81.60090134                     |              |        |
| ENSG00000145386         | 2818.828751                                        | 2083.27859                      | 2781.842518  |        |
| 1095.018699             | 574.1703896                                        | 335.5665886                     | 2561.31662   |        |
| 668.2518924             | 1.938675515                                        | 0.000111969                     | 0.002148175  | CCNA2  |
| 4                       | 121816444                                          | 121823933                       | - 2798       |        |
| protein_coding          | cyclin A2                                          | [Source:HGNC                    |              |        |
| Symbol;Acc:HGNC:1578]   | -                                                  | 3107 2354 2393 1057 503 389     | 54.37787432  |        |
| 3107                    | 2354 2393 1057 503 389                             | 54.37787432                     |              |        |
| 39.86439608             | 53.21105076                                        | 20.99129929                     | 11.0501363   |        |
| 6.464469776             |                                                    |                                 |              |        |
| ENSG00000126062         | 1258.35709                                         | 1800.965137                     | 1292.690715  |        |
| 1707.27608              | 3016.962902                                        | 3020.099298                     | 1450.67098   |        |
| 2581.446093             | -0.831197725                                       | 0.000113091                     | 0.002165774  |        |
| TMEM115 3               | 50354749                                           | 50359610                        | - 2197       |        |
| protein_coding          | transmembrane protein 115                          | [Source:HGNC                    |              |        |
| Symbol;Acc:HGNC:30055]  | -                                                  | 1387 2035                       | 1112 1648    | 2643   |
| 3501                    | 30.9154155                                         | 43.88951659                     | 31.49064651  |        |
| 41.68110213             | 73.94596253                                        | 74.09571138                     |              |        |
| ENSG00000148841         | 2126.596264                                        | 2397.45187                      | 2120.384769  |        |
| 2655.187252             | 3648.207883                                        | 4188.112565                     | 2214.810968  |        |
| 3497.169233             | -0.659068885                                       | 0.000113131                     | 0.002165774  | ITPRIP |
| 10                      | 104309698                                          | 104338448                       | - 7279       |        |
| protein_coding          | "inositol 1,4,5-trisphosphate receptor interacting | protein                         | [Source:HGNC |        |
| Symbol;Acc:HGNC:29370]" | -                                                  | 1824 2563 3196 4855 15.76937829 | 17.63452339  |        |
| 1824                    | 2563 3196 4855 15.76937829                         | 17.63452339                     |              |        |
| 15.59049704             | 19.56540898                                        | 26.98872769                     | 31.01333947  |        |
| ENSG00000101146         | 2147.463036                                        | 2239.922733                     | 2326.145791  |        |
| 2807.474621             | 3431.324435                                        | 3618.770795                     | 2237.843853  |        |
| 3285.856617             | -0.554432186                                       | 0.000114384                     | 0.002187395  | RAE1   |
| 20                      | 57351010                                           | 57379211                        | + 5855       |        |
| protein_coding          | ribonucleic acid export 1                          | [Source:HGNC                    |              |        |
| Symbol;Acc:HGNC:9828]   | -                                                  | 2367 2531                       | 2001 2710    | 3006   |
| 4195                    | 19.79703004                                        | 20.48291141                     | 21.26312224  |        |
| 25.71902112             | 31.55799747                                        | 33.31471359                     |              |        |
| ENSG00000196123         | 478.1212591                                        | 407.0977704                     | 421.9844689  |        |
| 236.2008168             | 260.2601368                                        | 209.621288                      | 435.7344995  |        |

|                        |                                                |             |                |             |
|------------------------|------------------------------------------------|-------------|----------------|-------------|
| 235.3607472            | 0.890335418                                    | 0.000114859 | 0.002194098    |             |
| KIAA0895L              | 16                                             | 67175602    | 67184040       | 4780        |
| protein_coding         | KIAA0895 like [Source:HGNC                     |             |                |             |
| Symbol;Acc:HGNC:34408] | -                                              | 527         | 460            | 228         |
| 243                    | 5.398976065                                    | 4.559911102 | 4.724823341    |             |
| 2.650446205            | 2.931934816                                    | 2.363792744 |                |             |
| ENSG00000171222        | 1159.466735                                    | 1727.510539 | 1604.238477    |             |
| 1857.491511            | 2625.431205                                    | 3465.221045 | 1497.071917    |             |
| 2649.381254            | -0.823956953                                   | 0.000115912 | 0.002210511    | SCAND1      |
| 20                     | 35953617                                       | 35959472    | -              | 1996        |
| protein_coding         | SCAN domain containing 1 [Source:HGNC          |             |                |             |
| Symbol;Acc:HGNC:10566] | -                                              | 1278        | 1952           | 2300        |
| 4017                   | 31.35443653                                    | 46.33889968 | 43.01554167    |             |
| 49.91508285            | 70.82957881                                    | 93.57768841 |                |             |
| ENSG00000170373        | 7.258007728                                    | 26.54985459 | 24.41232465    | 0           |
| 0                      | 0                                              | 19.40672899 | 0              | 6.710404485 |
| 0.000115968            | 0.002210511                                    | CST1        | 20             | 23747553    |
| 23751268               | -                                              | 872         | protein_coding | cystatin SN |
| [Source:HGNC           | Symbol;Acc:HGNC:2473]                          | -           | 8              | 30          |
| 0                      | 0                                              | 0           | 0.449264586    | 1.630163672 |
| 1.498337525            | 0                                              | 0           | 0              |             |
| ENSG00000138600        | 1660.269268                                    | 1689.455747 | 1800.699566    |             |
| 1226.586698            | 1196.283436                                    | 1007.562405 | 1716.808194    |             |
| 1143.477513            | 0.58672232                                     | 0.000116872 | 0.002225341    | SPPL2A      |
| 15                     | 50702266                                       | 50765808    | -              | 8144        |
| protein_coding         | signal peptide peptidase like 2A [Source:HGNC  |             |                |             |
| Symbol;Acc:HGNC:30227] | -                                              | 1830        | 1909           | 1048        |
| 1168                   | 11.00378277                                    | 11.10694456 | 11.83369848    |             |
| 8.078411676            | 7.909897903                                    | 6.668621924 |                |             |
| ENSG00000162512        | 2654.616326                                    | 2300.102403 | 2172.696894    |             |
| 1795.333402            | 1450.836114                                    | 1470.799572 | 2375.805208    |             |
| 1572.323029            | 0.595822749                                    | 0.000117246 | 0.002230078    | SDC3        |
| 1                      | 30869467                                       | 30908761    | -              | 7067        |
| protein_coding         | syndecan 3 [Source:HGNC                        |             |                |             |
| Symbol;Acc:HGNC:10660] | -                                              | 1733        | 1271           | -           |
| 2926                   | 2599                                           | 1869        | 1705           | 20.27532918 |
| 17.42599676            | 16.45436234                                    | 13.62622372 | 11.05497639    |             |
| 11.21812591            |                                                |             |                |             |
| ENSG0000012048         | 2461.371871                                    | 1919.554487 | 1833.249332    |             |
| 1605.751167            | 1043.323531                                    | 948.9029498 | 2071.391897    |             |
| 1199.325883            | 0.78888869                                     | 0.000117666 | 0.002235653    | BRCA1       |
| 17                     | 43044295                                       | 43170245    | -              | 9187        |
| protein_coding         | "BRCA1, DNA repair associated [Source:HGNC     |             |                |             |
| Symbol;Acc:HGNC:1100]" | -                                              | 2713        | 2169           | 914         |
| 1100                   | 14.46121427                                    | 11.18696493 | 10.6798419     |             |
| 9.374972996            | 6.115329181                                    | 5.567368744 |                |             |
| ENSG00000204628        | 20435.82801                                    | 23283.33748 | 24635.52304    |             |
| 28994.68624            | 34081.52151                                    | 32539.60743 | 22784.89618    |             |
| 31871.93839            | -0.484241653                                   | 0.000117873 | 0.002237191    | RACK1       |
| 5                      | 181236909                                      | 181248096   | -              | 5990        |
| protein_coding         | receptor for activated C kinase 1 [Source:HGNC |             |                |             |

|                                                          |                                                    |                        |       |                |       |        |
|----------------------------------------------------------|----------------------------------------------------|------------------------|-------|----------------|-------|--------|
| Symbol;Acc:HGNC:4399]                                    | -                                                  | 22525                  | 26309 | 21192          | 27988 | 29857  |
| 37721                                                    | 184.1478535                                        | 208.115276             |       | 220.1161811    |       |        |
| 259.6313231                                              | 306.3844403                                        | 292.8110037            |       |                |       |        |
| ENSG00000142731                                          | 989.8108039                                        | 739.855948             |       | 673.0826653    |       |        |
| 562.5308927                                              | 310.4857773                                        | 203.5828147            |       | 800.9164724    |       |        |
| 358.8664949                                              | 1.159807471                                        | 0.000118295            |       | 0.002242783    |       | PLK4   |
| 4                                                        | 127880861                                          | 127899195              |       | +              | 4482  |        |
| protein_coding                                           | polo like kinase 4 [Source:HGNC                    | Symbol;Acc:HGNC:11397] |       |                |       |        |
| -                                                        | 1091 836                                           | 579 543                |       | 272            | 236   |        |
| 11.9201462                                               | 8.838139784                                        | 8.037362535            |       | 6.731936659    |       |        |
| 3.730305598                                              | 2.448336848                                        |                        |       |                |       |        |
| ENSG00000170004                                          | 3050.177748                                        | 2788.619727            |       | 3758.335504    |       |        |
| 1978.699825                                              | 1857.207204                                        | 2396.411268            |       | 3199.044326    |       |        |
| 2077.439432                                              | 0.621990677                                        | 0.000118592            |       | 0.00224601     |       | CHD3   |
| 17                                                       | 7884806 7912760                                    | +                      | 9758  | protein_coding |       |        |
| chromodomain helicase DNA binding protein 3 [Source:HGNC |                                                    |                        |       |                |       |        |
| Symbol;Acc:HGNC:1918]                                    | -                                                  | 3362                   | 3151  | 3233           | 1910  | 1627   |
| 2778                                                     | 16.87196162                                        | 15.30079619            |       | 20.61349999    |       |        |
| 10.87638562                                              | 10.24882551                                        | 13.23739248            |       |                |       |        |
| ENSG00000091317                                          | 2637.378558                                        | 2489.491366            |       | 2430.77004     |       |        |
| 1882.354755                                              | 1717.945201                                        | 1666.618635            |       | 2519.213321    |       |        |
| 1755.639531                                              | 0.521238004                                        | 0.000119189            |       | 0.002254908    |       | CMTM6  |
| 3                                                        | 32481312                                           | 32503408               |       | -              | 4413  |        |
| protein_coding                                           | CKLF like MARVEL transmembrane domain containing 6 |                        |       |                |       |        |
| [Source:HGNC                                             | Symbol;Acc:HGNC:19177]                             | -                      |       | 2907           | 2813  | 2091   |
| 1817                                                     | 1505 1932                                          | 32.25817457            |       | 30.20384588    |       |        |
| 29.47996421                                              | 22.87878955                                        | 20.96283098            |       | 20.35655171    |       |        |
| ENSG00000174442                                          | 1815.409183                                        | 1397.407347            |       | 1401.96493     |       |        |
| 1185.147958                                              | 565.0384549                                        | 697.8749876            |       | 1538.260486    |       |        |
| 816.0204669                                              | 0.914678677                                        | 0.000120729            |       | 0.002281591    |       | ZWILCH |
| 15                                                       | 66504959                                           | 66550128               |       | +              | 4849  |        |
| protein_coding                                           | zwilch kinetochore protein [Source:HGNC            |                        |       |                |       |        |
| Symbol;Acc:HGNC:25468]                                   | -                                                  | 2001                   | 1579  | 1206           | 1144  | 495    |
| 809                                                      | 20.20801186                                        | 15.42966108            |       | 15.47397783    |       |        |
| 13.10949264                                              | 6.274807038                                        | 7.757599518            |       |                |       |        |
| ENSG00000260231                                          | 13.60876449                                        | 15.0449176             |       | 16.2748831     |       |        |
| 75.62570013                                              | 74.19696883                                        | 59.52209412            |       | 14.9761884     |       |        |
| 69.78158769                                              | -2.22173385                                        | 0.000121986            |       | 0.002302887    |       | KDM7A- |
| DT                                                       | 7                                                  | 140177184              |       | 140179640      | +     | 2457   |
| bidirectional_promoter_lncRNA                            | KDM7A divergent transcript                         |                        |       |                |       |        |
| [Source:HGNC                                             | Symbol;Acc:HGNC:48959]                             | -                      |       | 15             | 17    | 14     |
| 73                                                       | 65 69                                              | 0.298961171            |       | 0.327846239    |       |        |
| 0.354511009                                              | 1.650934135                                        | 1.626131117            |       | 1.305794853    |       |        |
| ENSG00000013563                                          | 257.6592743                                        | 234.5237156            |       | 291.7854041    |       |        |
| 139.8557468                                              | 118.7151501                                        | 93.16501689            |       | 261.322798     |       |        |
| 117.2453046                                              | 1.157639562                                        | 0.000122216            |       | 0.002303346    |       |        |
| DNASE1L1                                                 | X                                                  | 154401238              |       | 154412112      | -     | 4130   |
| protein_coding                                           | deoxyribonuclease 1 like 1 [Source:HGNC            |                        |       |                |       |        |
| Symbol;Acc:HGNC:2957]                                    | -                                                  | 284                    | 265   | 251            | 135   | 104    |
| 108                                                      | 3.367417557                                        | 3.040340769            |       | 3.78120755     |       |        |

|                        |                                                  |             |             |        |  |
|------------------------|--------------------------------------------------|-------------|-------------|--------|--|
| 1.8163342              | 1.547856331                                      | 1.215919216 |             |        |  |
| ENSG00000136827        | 1343.638681                                      | 1571.751392 | 1341.515364 |        |  |
| 2059.505368            | 2115.184358                                      | 2055.668845 | 1418.968479 |        |  |
| 2076.78619             | -0.54907947                                      | 0.000122377 | 0.002303346 | TOR1A  |  |
| 9                      | 129812944                                        | 129824134   | - 3766      |        |  |
| protein_coding         | torsin family 1 member A [Source:HGNC            |             |             |        |  |
| Symbol;Acc:HGNC:3098]  | -                                                | 1481 1776   | 1154 1988   | 1853   |  |
| 2383                   | 19.25765608                                      | 22.34544905 | 19.06480378 |        |  |
| 29.3324344             | 30.24422525                                      | 29.422173   |             |        |  |
| ENSG00000111412        | 1131.341955                                      | 1161.998636 | 1092.742151 |        |  |
| 1470.039294            | 1733.926087                                      | 2033.24023  | 1128.694247 |        |  |
| 1745.735204            | -0.629409876                                     | 0.000122401 | 0.002303346 |        |  |
| C12orf49               | 12 116710185                                     | 116738070   | -           | 8664   |  |
| protein_coding         | chromosome 12 open reading frame 49              |             |             |        |  |
| [Source:HGNC           | Symbol;Acc:HGNC:26128]                           | -           | 1247 1313   | 940    |  |
| 1419                   | 1519 2357                                        | 7.048175239 | 7.180798221 |        |  |
| 6.750194031            | 9.100725087                                      | 10.77672226 | 12.64946498 |        |  |
| ENSG00000185262        | 1710.168071                                      | 1970.884206 | 2302.895958 |        |  |
| 1035.968495            | 1406.317932                                      | 1321.563017 | 1994.649412 |        |  |
| 1254.616482            | 0.668507324                                      | 0.000123545 | 0.002322411 | UBALD2 |  |
| 17                     | 76265202                                         | 76271299    | + 1797      |        |  |
| protein_coding         | UBA like domain containing 2 [Source:HGNC        |             |             |        |  |
| Symbol;Acc:HGNC:28438] | -                                                | 1885 2227   | 1981 1000   | 1232   |  |
| 1532                   | 51.36791769                                      | 58.7216947  | 68.58722707 |        |  |
| 30.92174302            | 42.14150009                                      | 39.64073572 |             |        |  |
| ENSG00000118523        | 1280.131113                                      | 1220.408316 | 1698.4003   |        |  |
| 1082.587077            | 429.2009274                                      | 477.9020311 | 1399.646577 |        |  |
| 663.2300119            | 1.077277678                                      | 0.000124256 | 0.002333299 | CTGF   |  |
| 6                      | 131948176                                        | 131951373   | - 2339      |        |  |
| protein_coding         | connective tissue growth factor [Source:HGNC     |             |             |        |  |
| Symbol;Acc:HGNC:2500]  | -                                                | 1411 1379   | 1461 1045   | 376    |  |
| 554                    | 29.54101924                                      | 27.93575963 | 38.86215152 |        |  |
| 24.82550618            | 9.881092919                                      | 11.01312481 |             |        |  |
| ENSG00000164574        | 2163.793554                                      | 1653.170946 | 1919.273714 |        |  |
| 1319.823863            | 1255.641011                                      | 1218.046332 | 1912.079405 |        |  |
| 1264.503735            | 0.596635728                                      | 0.00012449  | 0.002335202 |        |  |
| GALNT10 5              | 154190730                                        | 154420984   | + 10496     |        |  |
| protein_coding         | polypeptide N-acetylgalactosaminyltransferase 10 |             |             |        |  |
| [Source:HGNC           | Symbol;Acc:HGNC:19873]                           | -           | 2385 1868   | 1651   |  |
| 1274                   | 1100 1412                                        | 11.12738834 | 8.432949327 |        |  |
| 9.786560784            | 6.744622541                                      | 6.441933293 | 6.255209977 |        |  |
| ENSG00000272899        | 64.41481858                                      | 86.72952501 | 52.31212425 |        |  |
| 132.6039673            | 214.6004637                                      | 212.2092051 | 67.81882261 |        |  |
| 186.4712121            | -1.455241803                                     | 0.000125062 | 0.002343447 |        |  |
| ATP6V1FNB              | 7 128866308                                      | 128872044   | + 3902      |        |  |
| protein_coding         | ATP6V1F neighbor [Source:HGNC                    |             |             |        |  |
| Symbol;Acc:HGNC:52392] | -                                                | 71 98       | 45 128      | 188    |  |
| 246                    | 0.891045266                                      | 1.190050117 | 0.717516835 |        |  |
| 1.822782071            | 2.961542329                                      | 2.931425492 |             |        |  |
| ENSG00000076924        | 1608.555963                                      | 1675.295825 | 2044.822812 |        |  |

|                         |                                         |                        |                |        |
|-------------------------|-----------------------------------------|------------------------|----------------|--------|
| 2203.504989             | 2979.293672                             | 3279.75365             | 1776.224867    |        |
| 2820.85077              | -0.667981599                            | 0.000125745            | 0.002353762    | XAB2   |
| 19                      | 7619525 7629565                         | - 4673                 | protein_coding | XPA    |
| binding protein         | 2 [Source:HGNC                          | Symbol;Acc:HGNC:14089] | -              | 1773   |
| 1893                    | 1759 2127                               | 2610 3802              | 18.57982581    |        |
| 19.19469757             | 23.41946151                             | 25.29203374            | 34.33144527    |        |
| 37.83095891             |                                         |                        |                |        |
| ENSG00000164604         | 448.1819772                             | 309.7483036            | 391.759686     |        |
| 216.5174154             | 187.2046598                             | 103.5166854            | 383.2299889    |        |
| 169.0795869             | 1.183526916                             | 0.000126332            | 0.002361097    | GPR85  |
| 7                       | 113078331                               | 113087778              | - 7396         |        |
| protein_coding          | G protein-coupled receptor 85           | [Source:HGNC           |                |        |
| Symbol;Acc:HGNC:4536]   | -                                       | 494 350                | 337 209        | 164    |
| 120                     | 3.270835705                             | 2.242319959            | 2.834913715    |        |
| 1.570223336             | 1.362995135                             | 0.754423767            |                |        |
| ENSG00000162851         | 1221.1598                               | 1260.233098            | 1061.354876    |        |
| 1867.851196             | 1561.560821                             | 1989.245638            | 1180.915925    |        |
| 1806.219219             | -0.612933394                            | 0.000126404            | 0.002361097    | TFB2M  |
| 1                       | 246540560                               | 246566324              | - 1848         |        |
| protein_coding          | "transcription factor B2, mitochondrial | [Source:HGNC           |                |        |
| Symbol;Acc:HGNC:18559]" | -                                       | 1346 1424              | 913 1803       | 1368   |
| 2306                    | 35.66742663                             | 36.51190252            | 30.73800361    |        |
| 54.21329496             | 45.50210525                             | 58.02142011            |                |        |
| ENSG00000143420         | 2772.558952                             | 3298.376936            | 3270.089011    |        |
| 2105.087982             | 1950.809534                             | 2330.8507              | 3113.674966    |        |
| 2128.916072             | 0.547992605                             | 0.000126594            | 0.002362162    | ENSA   |
| 1                       | 150600851                               | 150629612              | - 5493         |        |
| protein_coding          | endosulfine alpha [Source:HGNC          | Symbol;Acc:HGNC:3360]  |                |        |
| -                       | 3056 3727                               | 2813 2032              | 1709 2702      |        |
| 27.24409804             | 32.14964891                             | 31.86155589            | 20.55541022    |        |
| 19.12404795             | 22.87213806                             |                        |                |        |
| ENSG00000136122         | 427.315205                              | 347.8030952            | 370.8348363    |        |
| 220.6612894             | 173.5067579                             | 81.9507093             | 381.9843788    |        |
| 158.7062522             | 1.270780226                             | 0.000126747            | 0.002362523    | BORA   |
| 13                      | 72727749                                | 72756198               | + 3189         |        |
| protein_coding          | "bora, aurora kinase A activator        | [Source:HGNC           |                |        |
| Symbol;Acc:HGNC:24724]" | -                                       | 471 393                | 319 213        | 152    |
| 95                      | 7.232610398                             | 5.839349531            | 6.223619178    |        |
| 3.711394569             | 2.929789572                             | 1.385160518            |                |        |
| ENSG00000119537         | 2204.619847                             | 2396.566875            | 2200.596693    |        |
| 3291.271908             | 3610.538653                             | 2925.209003            | 2267.261138    |        |
| 3275.673188             | -0.530393888                            | 0.000128058            | 0.002384431    | KDSR   |
| 18                      | 63327726                                | 63367510               | - 9313         |        |
| protein_coding          | 3-ketodihydrosphingosine reductase      | [Source:HGNC           |                |        |
| Symbol;Acc:HGNC:4021]   | -                                       | 2430 2708              | 1893 3177      | 3163   |
| 3391                    | 12.77748425                             | 13.77797835            | 12.64642747    |        |
| 18.95569253             | 20.8764644                              | 16.93047742            |                |        |
| ENSG00000198695         | 4759.438568                             | 6035.666944            | 4161.720107    |        |
| 7410.282644             | 6820.413673                             | 8405.554857            | 4985.608539    |        |
| 7545.417058             | -0.597683222                            | 0.000128854            | 0.002396733    | MT-ND6 |



|                                                                                                               |              |          |             |             |                |             |           |
|---------------------------------------------------------------------------------------------------------------|--------------|----------|-------------|-------------|----------------|-------------|-----------|
| MT                                                                                                            | 14149        | 14673    | -           | 525         | protein_coding |             |           |
| mitochondrially encoded NADH:ubiquinone oxidoreductase core subunit 6 [Source:HGNC Symbol;Acc:HGNC:7462]      |              |          |             |             |                | 5246        | 6820 3580 |
| 7153                                                                                                          | 5975         | 9744     | 489.3252948 | 615.533242  |                |             |           |
| 424.2585173                                                                                                   | 757.0785912  |          | 699.5616065 | 862.9964118 |                |             |           |
| ENSG00000112186                                                                                               | 443.6457224  |          | 310.6332987 | 344.0975284 |                |             |           |
| 217.5533839                                                                                                   | 138.1205112  |          | 70.73640171 | 366.1255165 |                |             |           |
| 142.1367656                                                                                                   | 1.368286157  |          | 0.00013027  | 0.002420525 |                |             | CAP2      |
| 6                                                                                                             | 17393216     |          | 17557792    | +           |                | 3637        |           |
| protein_coding cyclase associated actin cytoskeleton regulatory protein 2 [Source:HGNC Symbol;Acc:HGNC:20039] |              |          |             |             |                | 489         | 351       |
| 296                                                                                                           | 210          | 121      | 82          | 6.584067    |                | 4.572884752 |           |
| 5.063551794                                                                                                   | 3.208396525  |          | 2.044981716 | 1.048338582 |                |             |           |
| ENSG00000111602                                                                                               | 1870.751492  |          | 1655.825931 | 1553.088844 |                |             |           |
| 1144.745187                                                                                                   | 1206.556862  |          | 1001.523932 | 1693.222089 |                |             |           |
| 1117.60866                                                                                                    | 0.600321027  |          | 0.00013352  | 0.002478309 |                |             |           |
| TIMELESS                                                                                                      | 12           | 56416373 |             | 56449403    |                |             | 5818      |
| protein_coding timeless circadian regulator [Source:HGNC Symbol;Acc:HGNC:11813]                               |              |          |             |             |                | 1336        | 1105 1057 |
| 1161                                                                                                          | 17.35575967  |          | 15.23794885 | 14.28695207 |                |             |           |
| 10.5535994                                                                                                    | 11.1673115   |          | 9.278751013 |             |                |             |           |
| ENSG00000266028                                                                                               | 1327.308163  |          | 1121.288859 | 1300.828156 |                |             |           |
| 887.8250001                                                                                                   | 760.2335576  |          | 772.0619455 | 1249.808393 |                |             |           |
| 806.7068344                                                                                                   | 0.631383917  |          | 0.000133927 | 0.002483264 |                |             | SRGAP2    |
| 1                                                                                                             | 206203345    |          | 206464443   | +           |                | 15675       |           |
| protein_coding SLIT-ROBO Rho GTPase activating protein 2 [Source:HGNC Symbol;Acc:HGNC:19751]                  |              |          |             |             |                | 1119        | 857 666   |
| 895                                                                                                           | 4.570518384  |          | 3.829971182 | 4.441497108 |                |             |           |
| 3.037982837                                                                                                   | 2.611644379  |          | 2.65488983  |             |                |             |           |
| ENSG00000182149                                                                                               | 2363.388766  |          | 2393.026894 | 2674.893286 |                |             |           |
| 3292.307877                                                                                                   | 3853.676412  |          | 3470.396879 | 2477.102982 |                |             |           |
| 3538.793723                                                                                                   | -0.514782537 |          | 0.000134438 | 0.002490136 |                |             | IST1      |
| 16                                                                                                            | 71845996     |          | 71931199    | +           |                | 7806        |           |
| protein_coding "IST1, ESCRT-III associated factor [Source:HGNC Symbol;Acc:HGNC:28977]"                        |              |          |             |             |                | 2301        | 3178 3376 |
| 4023                                                                                                          | 16.34210002  |          | 16.41362781 | 18.33981364 |                |             |           |
| 22.62233293                                                                                                   | 26.58405649  |          | 23.96362439 |             |                |             |           |
| ENSG00000065534                                                                                               | 4007.327517  |          | 3290.411979 | 3122.452572 |                |             |           |
| 2827.158023                                                                                                   | 1670.002545  |          | 1585.530565 | 3473.397356 |                |             |           |
| 2027.563711                                                                                                   | 0.776867205  |          | 0.000135169 | 0.002501042 |                |             | MYLK      |
| 3                                                                                                             | 123610049    |          | 123884331   | -           |                | 22167       |           |
| protein_coding myosin light chain kinase [Source:HGNC Symbol;Acc:HGNC:7590]                                   |              |          |             |             |                | 2686        | 2729 1463 |
| 1838                                                                                                          | 9.757738194  |          | 7.947470142 | 7.538864432 |                |             |           |
| 6.840827795                                                                                                   | 4.056810906  |          | 3.855401428 |             |                |             |           |
| ENSG00000151718                                                                                               | 1229.325059  |          | 1130.138811 | 1132.266867 |                |             |           |
| 855.7099768                                                                                                   | 704.300458   |          | 646.1166449 | 1163.910245 |                |             |           |
| 735.3756932                                                                                                   | 0.663045399  |          | 0.000135469 | 0.002503982 |                |             | WWC2      |
| 4                                                                                                             | 183099293    |          | 183320777   | +           |                | 9966        |           |
| protein_coding WW and C2 domain containing 2 [Source:HGNC                                                     |              |          |             |             |                |             |           |

|                        |                                                   |                        |             |      |      |             |
|------------------------|---------------------------------------------------|------------------------|-------------|------|------|-------------|
| Symbol;Acc:HGNC:24148] | -                                                 | 1355                   | 1277        | 974  | 826  | 617         |
| 749                    | 6.658050669                                       | 6.071506374            | 6.080578795 |      |      |             |
| 4.605440843            | 3.805499256                                       | 3.494555586            |             |      |      |             |
| ENSG00000139880        | 272.1752898                                       | 253.9936089            | 319.6852037 |      |      |             |
| 103.5968495            | 78.76293614                                       | 167.3519748            | 281.9513675 |      |      |             |
| 116.5705868            | 1.267945692                                       | 0.000137263            | 0.002534485 |      |      | CDH24       |
| 14                     | 23047062                                          | 23057538               | -           | 3748 |      |             |
| protein_coding         | cadherin 24 [Source:HGNC                          | Symbol;Acc:HGNC:14265] | -           |      |      |             |
| 300                    | 287                                               | 275                    | 100         | 69   | 194  | 3.919677681 |
| 3.628346506            | 4.564991342                                       | 1.482560624            | 1.13161024  |      |      |             |
| 2.406762111            |                                                   |                        |             |      |      |             |
| ENSG00000173846        | 400.097676                                        | 583.2118059            | 614.9580828 |      |      |             |
| 615.365286             | 1281.895323                                       | 1341.403715            | 532.7558549 |      |      |             |
| 1079.554775            | -1.019729874                                      | 0.000138008            | 0.002545444 |      |      | PLK3        |
| 1                      | 44800225                                          | 44805990               | +           | 3479 |      |             |
| protein_coding         | polo like kinase 3 [Source:HGNC                   | Symbol;Acc:HGNC:2154]  |             |      |      |             |
| -                      | 441                                               | 659                    | 529         | 594  | 1123 | 1555        |
| 6.207444486            | 8.975474692                                       | 9.460369296            | 9.487331155 |      |      |             |
| 19.84141714            | 20.78293995                                       |                        |             |      |      |             |
| ENSG00000198890        | 1437.992781                                       | 1406.257298            | 1211.316299 |      |      |             |
| 1800.513244            | 2052.402307                                       | 2252.350547            | 1351.85546  |      |      |             |
| 2035.088699            | -0.589835358                                      | 0.000138144            | 0.002545444 |      |      | PRMT6       |
| 1                      | 107056679                                         | 107067636              | +           | 4335 |      |             |
| protein_coding         | protein arginine methyltransferase 6 [Source:HGNC | Symbol;Acc:HGNC:18241] | -           |      |      |             |
| 2611                   | 17.90477419                                       | 17.36845694            | 14.95496716 |      |      | 1798        |
| 22.2778212             | 25.49458493                                       | 28.00585192            |             |      |      |             |
| ENSG00000186642        | 89.81784563                                       | 69.9146171             | 159.261356  |      |      |             |
| 278.6755251            | 229.4398575                                       | 290.7093583            | 106.3312729 |      |      |             |
| 266.2749136            | -1.331692805                                      | 0.000138858            | 0.002555942 |      |      | PDE2A       |
| 11                     | 72576141                                          | 72674591               | -           | 7182 |      |             |
| protein_coding         | phosphodiesterase 2A [Source:HGNC                 | Symbol;Acc:HGNC:8777]  | -           |      |      |             |
| 337                    | 0.675022855                                       | 0.52120447             | 1.18681223  |      |      | 201         |
| 2.081224467            | 1.72027555                                        | 2.181802918            |             |      |      |             |
| ENSG00000103995        | 703.1194986                                       | 470.8174215            | 502.1963928 |      |      |             |
| 335.6537923            | 214.6004637                                       | 307.0995001            | 558.7111043 |      |      |             |
| 285.7845854            | 0.966206331                                       | 0.000140148            | 0.002577005 |      |      | CEP152      |
| 15                     | 48712928                                          | 48811146               | -           | 8168 |      |             |
| protein_coding         | centrosomal protein 152 [Source:HGNC              | Symbol;Acc:HGNC:29298] | -           |      |      |             |
| 356                    | 4.646379269                                       | 3.086187757            | 3.290598265 |      |      | 188         |
| 2.204150905            | 1.414781852                                       | 2.026587161            |             |      |      |             |
| ENSG00000136717        | 1422.569515                                       | 1811.585078            | 2039.010354 |      |      |             |
| 1192.399738            | 1136.925861                                       | 1016.188795            | 1757.721649 |      |      |             |
| 1115.171465            | 0.656274821                                       | 0.000141416            | 0.002597623 |      |      | BIN1        |
| 2                      | 127048027                                         | 127107355              | -           | 6929 |      |             |
| protein_coding         | bridging integrator 1 [Source:HGNC                | Symbol;Acc:HGNC:1052]  | -           |      |      |             |
| 1178                   | 11.08164365                                       | 13.99824925            | 15.74946749 |      |      | 996         |

|                        |                                                       |                |                |             |  |  |
|------------------------|-------------------------------------------------------|----------------|----------------|-------------|--|--|
| 9.230321028            | 8.835601847                                           | 7.905070496    |                |             |  |  |
| ENSG00000148331        | 678.6237226                                           | 736.3159674    | 618.4455577    |             |  |  |
| 865.0336932            | 1288.744274                                           | 1256.00245     | 677.7950826    |             |  |  |
| 1136.593472            | -0.745247102                                          | 0.000141877    | 0.002603381    | ASB6        |  |  |
| 9                      | 129634604                                             | 129642169      | - 4622         |             |  |  |
| protein_coding         | ankyrin repeat and SOCS box containing 6 [Source:HGNC |                |                |             |  |  |
| Symbol;Acc:HGNC:17181] | -                                                     | 748 832        | 532 835        | 1129        |  |  |
| 1456                   | 7.925019514                                           | 8.529426399    | 7.161245094    |             |  |  |
| 10.03849433            | 15.01451683                                           | 14.64746443    |                |             |  |  |
| ENSG00000145649        | 19.05227029                                           | 14.15992245    | 20.9248497     | 0           |  |  |
| 0                      | 0                                                     | 18.04568081    | 0              | 6.605670376 |  |  |
| 0.000143419            | 0.002628959                                           | GZMA 5         | 55102648       |             |  |  |
| 55110252               | + 894                                                 | protein_coding | granzyme A     |             |  |  |
| [Source:HGNC           | Symbol;Acc:HGNC:4708]                                 | -              | 21 16          | 18          |  |  |
| 0                      | 0                                                     | 0              | 1.150298251    | 0.848025486 |  |  |
| 1.252684873            | 0                                                     | 0              | 0              |             |  |  |
| ENSG00000231500        | 25533.67119                                           | 36767.12364    | 38090.2014     |             |  |  |
| 43196.77833            | 55392.03245                                           | 55453.02575    | 33463.66541    |             |  |  |
| 51347.27884            | -0.617720225                                          | 0.000144392    | 0.00264404     | RPS18       |  |  |
| 6                      | 33272010                                              | 33276510       | + 1898         |             |  |  |
| protein_coding         | ribosomal protein S18 [Source:HGNC                    |                |                |             |  |  |
| Symbol;Acc:HGNC:10401] | -                                                     | 28144 41545    | 32766 41697    | 48526       |  |  |
| 64283                  | 726.1365502                                           | 1037.16773     | 1074.073658    |             |  |  |
| 1220.732888            | 1571.540747                                           | 1574.82009     |                |             |  |  |
| ENSG00000173848        | 974.3875375                                           | 938.0948623    | 977.6554776    |             |  |  |
| 728.2858519            | 471.436125                                            | 383.8743751    | 963.3792924    |             |  |  |
| 527.8654507            | 0.868745418                                           | 0.000144614    | 0.002645381    | NET1        |  |  |
| 10                     | 5412551 5458463                                       | + 4175         | protein_coding |             |  |  |
| neuroepithelial        | cell transforming 1 [Source:HGNC                      |                |                |             |  |  |
| Symbol;Acc:HGNC:14592] | -                                                     | 1074 1060      | 841 703        | 413         |  |  |
| 445                    | 12.59727137                                           | 12.03028251    | 12.5327496     |             |  |  |
| 9.356445427            | 6.080522951                                           | 4.956037106    |                |             |  |  |
| ENSG00000181894        | 91.63234756                                           | 64.60464618    | 75.56195724    |             |  |  |
| 250.7043758            | 159.8088559                                           | 179.4289214    | 77.26631699    |             |  |  |
| 196.6473844            | -1.34770108                                           | 0.000145133    | 0.002652126    | ZNF329      |  |  |
| 19                     | 58126252                                              | 58155110       | - 4309         |             |  |  |
| protein_coding         | zinc finger protein 329 [Source:HGNC                  |                |                |             |  |  |
| Symbol;Acc:HGNC:14209] | zf-C2H2                                               | 101 73         | 65 242         | 140         |  |  |
| 208                    | 1.147819407                                           | 0.802736123    | 0.938520383    |             |  |  |
| 3.120692057            | 1.997095816                                           | 2.244490952    |                |             |  |  |
| ENSG00000204116        | 697.6759928                                           | 631.8865393    | 512.6588176    |             |  |  |
| 1145.781155            | 1019.352203                                           | 885.0676605    | 614.0737833    |             |  |  |
| 1016.733673            | -0.72579387                                           | 0.000146504    | 0.00267373     | CHIC1       |  |  |
| X                      | 73563200                                              | 73687102       | + 6939         |             |  |  |
| protein_coding         | cysteine rich hydrophobic domain 1 [Source:HGNC       |                |                |             |  |  |
| Symbol;Acc:HGNC:1934]  | -                                                     | 769 714        | 441 1106       | 893         |  |  |
| 1026                   | 5.426978935                                           | 4.875596595    | 3.954108195    |             |  |  |
| 8.856666329            | 7.910463511                                           | 6.875139132    |                |             |  |  |
| ENSG00000041357        | 3105.520057                                           | 3122.2629      | 3503.749833    |             |  |  |
| 2144.454784            | 2260.15382                                            | 2436.092664    | 3243.844263    |             |  |  |

|                        |                                                      |             |                 |        |
|------------------------|------------------------------------------------------|-------------|-----------------|--------|
| 2280.233756            | 0.508068958                                          | 0.000146618 | 0.00267373      | PSMA4  |
| 15                     | 78540405                                             | 78552419    | + 6996          |        |
| protein_coding         | proteasome subunit alpha 4 [Source:HGNC              |             |                 |        |
| Symbol;Acc:HGNC:9533]  | -                                                    | 3423 3528   | 3014 2070       | 1980   |
| 2824                   | 23.95994307                                          | 23.89489995 | 26.80404225     |        |
| 16.44116502            | 17.39653478                                          | 18.76920638 |                 |        |
| ENSG00000105640        | 17809.33646                                          | 23634.68056 | 27175.5673      |        |
| 29050.62853            | 37757.1252                                           | 39145.69724 | 22873.19477     |        |
| 35317.81699            | -0.626796959                                         | 0.000147664 | 0.002690039     | RPL18A |
| 19                     | 17859876                                             | 17864153    | + 3527          |        |
| protein_coding         | ribosomal protein L18a [Source:HGNC                  |             |                 |        |
| Symbol;Acc:HGNC:10311] | -                                                    | 19630 26706 | 23377 28042     | 33077  |
| 45379                  | 272.5483289                                          | 358.781322  | 412.3729445     |        |
| 441.7896823            | 576.4584555                                          | 598.2469315 |                 |        |
| ENSG00000102265        | 3473.863949                                          | 5479.004993 | 5699.696559     |        |
| 6206.487253            | 9415.024599                                          | 8712.654357 | 4884.1885       |        |
| 8111.388736            | -0.731967361                                         | 0.000148237 | 0.0026977       | TIMP1  |
| X                      | 47582313                                             | 47586789    | + 1541          |        |
| protein_coding         | TIMP metalloproteinase inhibitor 1 [Source:HGNC      |             |                 |        |
| Symbol;Acc:HGNC:11820] | -                                                    | 3829 6191   | 4903 5991       | 8248   |
| 10100                  | 121.6778175                                          | 190.3639055 | 197.9548292     |        |
| 216.0273432            | 328.9980878                                          | 304.7542376 |                 |        |
| ENSG00000087266        | 1199.385777                                          | 1208.903379 | 1275.25334      |        |
| 873.3214412            | 733.9792455                                          | 812.6059807 | 1227.847499     |        |
| 806.6355558            | 0.605580059                                          | 0.000148833 | 0.002704406     | SH3BP2 |
| 4                      | 2793023 2841098                                      | + 13968     | protein_coding  | SH3    |
| domain binding         | protein 2 [Source:HGNC Symbol;Acc:HGNC:10825]        |             |                 | -      |
| 1322                   | 1366 1097                                            | 843 643     | 942 4.634745723 |        |
| 4.633860056            | 4.886290103                                          | 3.35355468  | 2.829593875     |        |
| 3.135795226            |                                                      |             |                 |        |
| ENSG00000120868        | 381.0454057                                          | 274.3484975 | 442.9093186     |        |
| 180.2585181            | 181.4972007                                          | 179.4289214 | 366.1010739     |        |
| 180.3948801            | 1.019631129                                          | 0.000148911 | 0.002704406     | APAF1  |
| 12                     | 98645141                                             | 98735433    | + 7908          |        |
| protein_coding         | apoptotic peptidase activating factor 1 [Source:HGNC |             |                 |        |
| Symbol;Acc:HGNC:576]   | -                                                    | 420 310     | 381 174         | 159    |
| 208                    | 2.600826091                                          | 1.857468571 | 2.997541204     |        |
| 1.222628827            | 1.235884325                                          | 1.223003479 |                 |        |
| ENSG00000107815        | 1036.987854                                          | 1168.193602 | 973.005511      |        |
| 1309.464178            | 1808.123056                                          | 2089.311768 | 1059.395656     |        |
| 1735.633               | -0.712152543                                         | 0.000149167 | 0.002706268     | TWNK   |
| 10                     | 100987367                                            | 100994401   | + 4133          |        |
| protein_coding         | twinkle mtDNA helicase [Source:HGNC                  |             |                 |        |
| Symbol;Acc:HGNC:1160]  | -                                                    | 1143 1320   | 837 1264        | 1584   |
| 2422                   | 13.54283255                                          | 15.13334618 | 12.59989423     |        |
| 16.99392559            | 23.55793028                                          | 27.2483213  |                 |        |
| ENSG00000160299        | 2357.03801                                           | 1866.454778 | 1829.761857     |        |
| 1533.233372            | 1101.539614                                          | 1169.738545 | 2017.751548     |        |
| 1268.170511            | 0.670229904                                          | 0.000149652 | 0.002712286     | PCNT   |
| 21                     | 46324122                                             | 46445769    | + 11660         |        |

|                                     |                                                       |             |             |             |             |       |               |
|-------------------------------------|-------------------------------------------------------|-------------|-------------|-------------|-------------|-------|---------------|
| protein_coding                      | pericentrin [Source:HGNC Symbol;Acc:HGNC:16068] -     |             |             |             |             |       |               |
|                                     | 2598                                                  | 2109        | 1574        | 1480        | 965         | 1356  | 10.91111869   |
|                                     | 8.570466667                                           |             | 8.39871848  |             | 7.053021515 |       | 5.087168504   |
|                                     | 5.407445578                                           |             |             |             |             |       |               |
| ENSG00000108106                     | 5878.98626                                            |             | 6815.347674 |             | 7007.499666 |       |               |
| 4419.441599                         | 4624.183396                                           |             | 4991.229516 |             | 6567.277866 |       |               |
| 4678.284837                         | 0.489106917                                           |             | 0.0001521   |             | 0.002753827 |       | UBE2S         |
| 19                                  | 55399745                                              |             | 55407777    |             | -           | 2788  |               |
| protein_coding                      | ubiquitin conjugating enzyme E2 S [Source:HGNC        |             |             |             |             |       |               |
| Symbol;Acc:HGNC:17895]              | -                                                     |             | 6480        | 7701        | 6028        | 4266  | 4051          |
|                                     | 5786                                                  | 113.8179921 | 130.8822628 |             | 134.5201432 |       |               |
| 85.02372447                         | 89.31344349                                           |             | 96.49763686 |             |             |       |               |
| ENSG00000187514                     | 20080.18563                                           |             | 20545.16248 |             | 25140.04442 |       |               |
| 15766.40452                         | 15792.53944                                           |             | 15647.40964 |             | 21921.79751 |       |               |
| 15735.4512                          | 0.478276818                                           |             | 0.000152675 |             | 0.002758116 |       | PTMA          |
| 2                                   | 231706895                                             |             | 231713541   |             | +           | 3378  |               |
| protein_coding                      | prothymosin alpha [Source:HGNC Symbol;Acc:HGNC:9623]  |             |             |             |             |       |               |
| -                                   | 22133                                                 | 23215       | 21626       | 15219       | 13835       | 18139 |               |
| 320.8553774                         | 325.6383036                                           |             | 398.3120086 |             | 250.3447657 |       |               |
| 251.7484924                         | 249.6805508                                           |             |             |             |             |       |               |
| ENSG00000188501                     | 124.2933823                                           |             | 74.33959286 |             | 75.56195724 |       |               |
| 6.215810969                         | 30.82027936                                           |             | 18.11541995 |             | 91.39831081 |       |               |
| 18.38383676                         | 2.321036068                                           |             | 0.000152785 |             | 0.002758116 |       | LCTL          |
| 15                                  | 66547179                                              |             | 66565979    |             | -           | 3518  |               |
| protein_coding                      | lactase like [Source:HGNC Symbol;Acc:HGNC:15583]      |             |             |             |             |       |               |
| -                                   | 137                                                   | 84          | 65          | 6           | 27          | 21    |               |
| 1.907011955                         | 1.131383633                                           |             | 1.149540742 |             | 0.094769253 |       |               |
| 0.471753672                         | 0.277558465                                           |             |             |             |             |       |               |
| ENSG00000272129                     | 25.40302705                                           |             | 17.69990306 |             | 27.8997996  |       |               |
| 1.035968495                         | 0                                                     | 0           | 23.66757657 |             | 0.345322832 |       |               |
| 6.034923652                         | 0.000152804                                           |             | 0.002758116 |             | AL359715.3  |       | 6             |
| 80355424                            | 80356859                                              |             | +           |             | 1436        |       | lincRNA novel |
| transcript                          | -                                                     | 28          | 20          | 24          | 1           | 0     | 0             |
|                                     | 0.954843674                                           | 0.659936268 | 1.039833125 |             | 0.038695245 |       |               |
|                                     | 0                                                     | 0           |             |             |             |       |               |
| ENSG00000197081                     | 2700.886126                                           |             | 2198.32796  |             | 2700.468103 |       |               |
| 1910.325905                         | 1627.767347                                           |             | 1512.206246 |             | 2533.227396 |       |               |
| 1683.433166                         | 0.589585227                                           |             | 0.000153449 |             | 0.002766937 |       | IGF2R         |
| 6                                   | 159969099                                             |             | 160113507   |             | +           | 17843 |               |
| protein_coding                      | insulin like growth factor 2 receptor [Source:HGNC    |             |             |             |             |       |               |
| Symbol;Acc:HGNC:5467]               | -                                                     |             | 2977        | 2484        | 2323        | 1844  | 1426          |
|                                     | 1753                                                  | 8.17033084  | 6.596448207 |             | 8.100058975 |       |               |
| 5.742553962                         | 4.912459809                                           |             | 4.568199466 |             |             |       |               |
| ENSG00000131018                     | 1284.667368                                           |             | 1557.591469 |             | 1069.492318 |       |               |
| 2444.885648                         | 1841.226319                                           |             | 1975.443414 |             | 1303.917052 |       |               |
| 2087.185127                         | -0.677943965                                          |             | 0.000153907 |             | 0.002772355 |       | SYNE1         |
| 6                                   | 152121684                                             |             | 152637801   |             | -           | 46064 |               |
| protein_coding                      | spectrin repeat containing nuclear envelope protein 1 |             |             |             |             |       |               |
| [Source:HGNC Symbol;Acc:HGNC:17089] | -                                                     |             |             |             | 1416        | 1760  | 920           |
|                                     | 2360                                                  | 1613        | 2290        | 1.505325052 | 1.810412173 |       |               |

|                                           |                                                     |             |             |                |           |
|-------------------------------------------|-----------------------------------------------------|-------------|-------------|----------------|-----------|
| 1.242604799                               | 2.846835672                                         | 2.152385611 | 2.311558309 |                |           |
| ENSG00000090863                           | 2932.235122                                         | 2568.255934 | 3865.284736 |                |           |
| 2306.06587                                | 1890.310467                                         | 1529.459027 | 3121.925264 |                |           |
| 1908.611788                               | 0.709849228                                         | 0.000154407 | 0.002778535 | GLG1           |           |
| 16                                        | 74447427                                            | 74607144    | - 14111     |                |           |
| protein_coding                            | golgi glycoprotein 1 [Source:HGNC                   |             |             |                |           |
| Symbol;Acc:HGNC:4316]                     | -                                                   | 3232        | 2902        | 3325           | 2226 1656 |
| 1773                                      | 11.21610958                                         | 9.744645781 | 14.66022732 |                |           |
| 8.765554852                               | 7.213564191                                         | 5.842274545 |             |                |           |
| ENSG00000099783                           | 9323.818177                                         | 9013.675635 | 9690.530394 |                |           |
| 7158.5423                                 | 6338.704122                                         | 7041.722527 | 9342.674735 |                |           |
| 6846.322983                               | 0.448365421                                         | 0.000154694 | 0.002780868 | HNRNPM         |           |
| 19                                        | 8444767                                             | 8489114 +   | 5614        | protein_coding |           |
| heterogeneous nuclear ribonucleoprotein M | [Source:HGNC                                        |             |             |                |           |
| Symbol;Acc:HGNC:5046]                     | -                                                   | 10277       | 10185       | 8336           | 6910 5553 |
| 8163                                      | 89.64428998                                         | 85.96369327 | 92.38301767 |                |           |
| 68.3939494                                | 60.79986646                                         | 67.6096062  |             |                |           |
| ENSG00000169826                           | 914.5089737                                         | 846.9403615 | 846.2939211 |                |           |
| 1279.421091                               | 1261.34847                                          | 1347.442189 | 869.2477521 |                |           |
| 1296.070583                               | -0.576322669                                        | 0.000157319 | 0.002825187 |                |           |
| CSGALNACT2                                | 10                                                  | 43138486    | 43185308    | +              | 3730      |
| protein_coding                            | chondroitin sulfate N-                              |             |             |                |           |
| acetylgalactosaminyltransferase 2         | [Source:HGNC Symbol;Acc:HGNC:24292]                 |             |             |                |           |
| -                                         | 1008                                                | 957         | 728         | 1235           | 1105 1562 |
| 13.23367253                               | 12.15708762                                         | 12.14309504 | 18.39798114 |                |           |
| 18.20961679                               | 19.47167068                                         |             |             |                |           |
| ENSG00000102794                           | 0                                                   | 5.309970919 | 16.2748831  | 62.15810969    |           |
| 42.23519764                               | 95.75293403                                         | 7.194951339 | 66.71541379 |                |           |
| -3.252007866                              | 0.00015873                                          | 0.002847647 | ACOD1       | 13             |           |
| 76948497                                  | 76958642                                            | +           | 2177        | protein_coding |           |
| aconitate decarboxylase 1                 | [Source:HGNC Symbol;Acc:HGNC:33904]                 |             |             |                |           |
| -                                         | 0                                                   | 6           | 14          | 60             | 37 111 0  |
| 0.130592809                               | 0.40010728                                          | 1.531457204 | 1.04469774  |                |           |
| 2.370803545                               |                                                     |             |             |                |           |
| ENSG00000083937                           | 1670.249028                                         | 1369.972497 | 1438.002171 |                |           |
| 2085.40458                                | 2255.587852                                         | 2209.218595 | 1492.741232 |                |           |
| 2183.403676                               | -0.548437159                                        | 0.000161063 | 0.002886573 | CHMP2B         |           |
| 3                                         | 87227271                                            | 87255548    | +           | 3106           |           |
| protein_coding                            | charged multivesicular body protein 2B [Source:HGNC |             |             |                |           |
| Symbol;Acc:HGNC:24537]                    | -                                                   | 1841        | 1548        | 1237           | 2013 1976 |
| 2561                                      | 29.02558761                                         | 23.61543478 | 24.77850471 |                |           |
| 36.01259087                               | 39.10505032                                         | 38.3388556  |             |                |           |
| ENSG00000168404                           | 326.6103478                                         | 330.9881873 | 248.7732131 |                |           |
| 492.0850351                               | 547.9160775                                         | 574.5176042 | 302.123916  |                |           |
| 538.1729056                               | -0.831102747                                        | 0.000161828 | 0.002897349 | MLKL           |           |
| 16                                        | 74671855                                            | 74700960    | -           | 5692           |           |
| protein_coding                            | mixed lineage kinase domain like pseudokinase       |             |             |                |           |
| [Source:HGNC Symbol;Acc:HGNC:26617]       | -                                                   |             | 360         | 374            | 214       |
| 475                                       | 480                                                 | 666         | 3.097178907 | 3.113387315    |           |
| 2.339137377                               | 4.637039142                                         | 5.183507201 | 5.440519308 |                |           |

|                                                             |                                                       |  |             |                     |        |
|-------------------------------------------------------------|-------------------------------------------------------|--|-------------|---------------------|--------|
| ENSG0000072062                                              | 1342.73143                                            |  | 1375.282468 | 1770.474783         |        |
| 1137.493407                                                 | 784.204886                                            |  | 733.2431885 | 1496.162893         |        |
| 884.9804939                                                 | 0.757340615                                           |  | 0.000162015 | 0.002897767         | PRKACA |
| 19                                                          | 14091688                                              |  | 14118084    | - 6144              |        |
| protein_coding                                              | protein kinase cAMP-activated catalytic subunit alpha |  |             |                     |        |
| [Source:HGNC Symbol;Acc:HGNC:9380]                          |                                                       |  | -           | 1480 1554           | 1523   |
| 1098                                                        | 687 850                                               |  | 11.79612027 | 11.98467464         |        |
| 15.42252713                                                 | 9.93031847                                            |  | 6.873103601 | 6.432780562         |        |
| ENSG0000099139                                              | 339.3118613                                           |  | 185.8489822 | 556.8335003         |        |
| 101.5249125                                                 | 191.7706271                                           |  | 100.0661293 | 360.6647812         |        |
| 131.1205563                                                 | 1.460858954                                           |  | 0.000162193 | 0.002898008         | PCSK5  |
| 9                                                           | 75890644                                              |  | 76362339    | + 12705             |        |
| protein_coding                                              | proprotein convertase subtilisin/kexin type 5         |  |             |                     |        |
| [Source:HGNC Symbol;Acc:HGNC:8747]                          |                                                       |  | -           | 374 210             | 479    |
| 98                                                          | 168 116                                               |  | 1.441536411 | 0.783197092         |        |
| 2.345674198                                                 | 0.428611135                                           |  | 0.812796776 | 0.424535818         |        |
| ENSG00000182578                                             | 375.6018999                                           |  | 309.7483036 | 318.5227121         |        |
| 203.049825                                                  | 136.9790194                                           |  | 151.824472  | 334.6243052         |        |
| 163.9511055                                                 | 1.029351165                                           |  | 0.000163089 | 0.002911082         | CSF1R  |
| 5                                                           | 150053291                                             |  | 150113372   | - 5151              |        |
| protein_coding                                              | colony stimulating factor 1 receptor [Source:HGNC     |  |             |                     |        |
| Symbol;Acc:HGNC:2433]                                       |                                                       |  | -           | 414 350 274 196     | 120    |
| 176                                                         | 3.935840359                                           |  | 3.219607536 | 3.309526474         |        |
| 2.114348467                                                 | 1.431980343                                           |  | 1.588737461 |                     |        |
| ENSG00000213853                                             | 1398.073739                                           |  | 1329.26272  | 1487.989312         |        |
| 1053.579959                                                 | 866.3922976                                           |  | 684.9354019 | 1405.10859          |        |
| 868.3025529                                                 | 0.695002874                                           |  | 0.000163816 | 0.002921107         | EMP2   |
| 16                                                          | 10528422                                              |  | 10580698    | - 8718              |        |
| protein_coding                                              | epithelial membrane protein 2 [Source:HGNC            |  |             |                     |        |
| Symbol;Acc:HGNC:3334]                                       |                                                       |  | -           | 1541 1502 1280 1017 | 759    |
| 794                                                         | 8.655944389                                           |  | 8.163558492 | 9.134819106         |        |
| 6.482106048                                                 | 5.35145985                                            |  | 4.234817079 |                     |        |
| ENSG00000083457                                             | 283.0623014                                           |  | 347.8030952 | 337.1225785         |        |
| 175.0786756                                                 | 144.9694622                                           |  | 168.2146138 | 322.6626583         |        |
| 162.7542505                                                 | 0.986033259                                           |  | 0.000164875 | 0.00293704          | ITGAE  |
| 17                                                          | 3714628 3801243                                       |  | - 6657      | protein_coding      |        |
| integrin subunit alpha E [Source:HGNC Symbol;Acc:HGNC:6147] |                                                       |  | -           |                     |        |
| 312                                                         | 393 290                                               |  | 169 127     | 195 2.295116423     |        |
| 2.797308946                                                 | 2.710355683                                           |  | 1.410652982 | 1.172661115         |        |
| 1.362031252                                                 |                                                       |  |             |                     |        |
| ENSG00000109089                                             | 1387.186727                                           |  | 1291.207928 | 1474.039412         |        |
| 926.1558344                                                 | 834.4305264                                           |  | 987.7217068 | 1384.144689         |        |
| 916.1026892                                                 | 0.594396537                                           |  | 0.000165705 | 0.002948844         | CDR2L  |
| 17                                                          | 74987632                                              |  | 75005800    | + 3536              |        |
| protein_coding                                              | cerebellar degeneration related protein 2 like        |  |             |                     |        |
| [Source:HGNC Symbol;Acc:HGNC:29999]                         |                                                       |  | -           | 1529 1459           | 1268   |
| 894                                                         | 731 1145                                              |  | 21.17502407 | 19.55102254         |        |
| 22.31073325                                                 | 14.04873777                                           |  | 12.70727653 | 15.05650763         |        |
| ENSG00000103512                                             | 1555.028156                                           |  | 1669.985854 | 2627.231129         |        |
| 953.0910153                                                 | 1104.96409                                            |  | 1331.914686 | 1950.748379         |        |

|                                                 |                                                    |                        |                        |             |
|-------------------------------------------------|----------------------------------------------------|------------------------|------------------------|-------------|
| 1129.98993                                      | 0.786545233                                        | 0.00016613             | 0.002953446            | NOM01       |
| 16                                              | 14833681                                           | 14896160               | + 5819                 |             |
| protein_coding                                  | NODAL modulator                                    | 1 [Source:HGNC         | Symbol;Acc:HGNC:30060] |             |
| -                                               | 1714 1887                                          | 2260 920               | 968 1544               |             |
| 14.42418035                                     | 15.36561629                                        | 24.16389437            | 8.785197186            |             |
| 10.22526001                                     | 12.33757929                                        |                        |                        |             |
| ENSG00000115355                                 | 1810.872928                                        | 1108.013932            | 1192.716433            |             |
| 983.1341017                                     | 603.8491771                                        | 671.9958163            | 1370.534431            |             |
| 752.9930317                                     | 0.864263214                                        | 0.000167575            | 0.002976144            |             |
| CCDC88A 2                                       | 55287842                                           | 55419895               | - 33942                |             |
| protein_coding                                  | coiled-coil domain containing                      | 88A [Source:HGNC       | Symbol;Acc:HGNC:25523] |             |
| -                                               | 779                                                | 1996 1252              | 1026 949               | 529         |
| 1.553605775                                     | 2.879730137                                        | 1.747806462            | 1.880688107            |             |
| ENSG00000276043                                 | 0.958000207                                        | 1.067163706            |                        |             |
| 5358.224205                                     | 5319.705865                                        | 5842.683032            |                        |             |
| 4476.419866                                     | 2849.163603                                        | 3472.984796            | 5506.871034            |             |
| 3599.522755                                     | 0.613242149                                        | 0.000168233            | 0.002984825            | UHRF1       |
| 19                                              | 4903080 4962154 +                                  | 5145                   | protein_coding         |             |
| ubiquitin like with PHD and ring finger domains | 1 [Source:HGNC                                     | Symbol;Acc:HGNC:12556] | -                      |             |
| -                                               | 4026                                               | 5906 6011              | 5026 4321              | 2496        |
| 46.66711259                                     | 56.21299787                                        | 55.35894305            | 60.77765671            |             |
| 29.81992605                                     | 36.3847512                                         |                        |                        |             |
| ENSG00000151388                                 | 670.4584639                                        | 554.0069659            | 805.6067134            |             |
| 462.0419487                                     | 223.7323983                                        | 328.6654763            | 676.6907144            |             |
| 338.1466078                                     | 0.999262632                                        | 0.000169453            | 0.003003454            |             |
| ADAMTS12                                        | 5 33523535                                         | 33892192               | -                      | 9778        |
| protein_coding                                  | ADAM metalloproteinase with thrombospondin type    |                        |                        |             |
| 1 motif                                         | 12 [Source:HGNC                                    | Symbol;Acc:HGNC:14605] | -                      |             |
| -                                               | 693 446                                            | 196 381                | 3.701034121            | 739 626     |
| 4.409507121                                     | 2.534526693                                        | 1.232121111            | 3.033547091            |             |
| ENSG00000176438                                 | 847.3724022                                        | 784.9907008            | 926.505845             |             |
| 637.1206244                                     | 414.3615336                                        | 377.8359018            | 852.956316             |             |
| 476.4393533                                     | 0.840424881                                        | 0.000171919            | 0.003044115            | SYNE3       |
| 14                                              | 95407266                                           | 95475836               | -                      | 18164       |
| protein_coding                                  | spectrin repeat containing nuclear envelope family |                        |                        |             |
| member 3                                        | [Source:HGNC                                       | Symbol;Acc:HGNC:19861] | -                      |             |
| -                                               | 797 615                                            | 363 438                | 2.51804836             | 934 887     |
| 2.7299436                                       | 1.881376289                                        | 1.228407592            | 2.313867933            |             |
| ENSG00000217801                                 | 38.10454057                                        | 36.28480128            | 48.8246493             |             |
| 3.107905485                                     | 6.848950969                                        | 0                      | 41.07133038            | 3.318952151 |
| 3.680722717                                     | 0.000172225                                        | 0.003046482            | AL390719.1             |             |
| 1                                               | 1059734 1069355 +                                  | 2171                   |                        |             |
| transcribed_unprocessed_pseudogene              | uncharacterized                                    | LOC100288175           |                        |             |
| [Source:NCBI                                    | gene;Acc:100288175]                                | -                      | 42 41 42               |             |
| 3                                               | 6 0                                                | 0.947366777            | 0.894850477            |             |
| 1.203639173                                     | 0.076784485                                        | 0.169878645            | 0                      |             |
| ENSG00000116459                                 | 4617.000166                                        | 4720.564147            | 5436.973447            |             |
| 3876.594108                                     | 3045.500198                                        | 3284.929484            | 4924.84592             |             |
| 3402.341263                                     | 0.533316726                                        | 0.000172416            | 0.003046821            | ATP5PB      |
| 1                                               | 111448864                                          | 111462773              | + 3383                 |             |



|                                     |                                                    |                                   |             |             |                |        |             |
|-------------------------------------|----------------------------------------------------|-----------------------------------|-------------|-------------|----------------|--------|-------------|
| protein_coding                      | ATP synthase peripheral stalk-membrane subunit b   |                                   |             |             |                |        |             |
| [Source:HGNC Symbol;Acc:HGNC:840]   | -                                                  | 5089                              | 5334        | 4677        |                |        |             |
| 3742                                | 2668                                               | 3808                              | 73.66465117 | 74.70977946 |                |        |             |
| 86.01460885                         | 61.46301058                                        | 48.47649234                       | 52.339065   |             |                |        |             |
| ENSG00000100029                     | 1461.581306                                        | 2120.448387                       | 1844.874248 |             |                |        |             |
| 2286.382468                         | 2980.435163                                        | 3574.776204                       | 1808.96798  |             |                |        |             |
| 2947.197945                         | -0.704421029                                       | 0.000172953                       | 0.003053252 |             |                | PES1   |             |
| 22                                  | 30576625                                           | 30607083                          | -           | 4557        |                |        |             |
| protein_coding                      | pescadillo ribosomal biogenesis factor 1           |                                   |             |             |                |        |             |
| [Source:HGNC Symbol;Acc:HGNC:8848]  | -                                                  | 1611                              | 2396        | 1587        | 2207           | 2611   |             |
| 4144                                | 17.31191836                                        | 24.91347027                       | 21.66729742 |             |                |        |             |
| 26.91134155                         | 35.21885264                                        | 42.28357863                       |             |             |                |        |             |
| ENSG00000140264                     | 1455.230549                                        | 2622.240639                       | 2541.206747 |             |                |        |             |
| 823.5949534                         | 1164.321665                                        | 1557.926116                       | 2206.225978 |             |                |        |             |
| 1181.947578                         | 0.899675326                                        | 0.000173221                       | 0.00305495  |             |                | SERF2  |             |
| 15                                  | 43777087                                           | 43802589                          | +           | 7347        |                |        |             |
| protein_coding                      | small EDRK-rich factor 2                           |                                   |             |             |                |        |             |
| [Source:HGNC Symbol;Acc:HGNC:10757] | -                                                  | 1604                              | 2963        | 2186        | 795            | 1020   |             |
| 1806                                | 10.69111516                                        | 19.10944406                       | 18.51172817 |             |                |        |             |
| 6.01269442                          | 8.533702374                                        | 11.42980245                       |             |             |                |        |             |
| ENSG00000125630                     | 2383.348288                                        | 2376.211986                       | 1940.198564 |             |                |        |             |
| 3194.926838                         | 3006.689475                                        | 3596.34218                        | 2233.252946 |             |                |        |             |
| 3265.986164                         | -0.548135727                                       | 0.000173552                       | 0.00305676  |             |                | POLR1B |             |
| 2                                   | 112541915                                          | 112577150                         | +           | 6329        |                |        |             |
| protein_coding                      | RNA polymerase I subunit B                         |                                   |             |             |                |        |             |
| [Source:HGNC Symbol;Acc:HGNC:20454] | -                                                  | 2627                              | 2685        | 1669        | 3084           | 2634   |             |
| 4169                                | 20.32608141                                        | 20.10183182                       | 16.4069588  |             |                |        |             |
| 27.07642469                         | 25.58161951                                        | 30.62864735                       |             |             |                |        |             |
| ENSG00000260966                     | 84.37433984                                        | 83.18954439                       | 112.76169   |             |                |        |             |
| 199.9419195                         | 214.6004637                                        | 226.0114299                       | 93.44185809 |             |                |        |             |
| 213.5179377                         | -1.196230981                                       | 0.00017367                        | 0.00305676  |             |                |        |             |
| AP001486.2                          | 11                                                 | 103050687                         | 103055799   | -           |                | 5113   |             |
|                                     | sense_overlapping                                  | "novel transcript, overlapping to |             |             |                |        |             |
| DCUN1D5"                            | -                                                  | 93                                | 94          | 97          | 193            | 188    | 262         |
|                                     | 0.890708998                                        | 0.871121037                       | 1.180328213 | 2.097459385 |                |        |             |
|                                     | 2.260109167                                        | 2.382629512                       |             |             |                |        |             |
| ENSG00000162521                     | 4803.893865                                        | 4222.311876                       | 4933.614562 |             |                |        |             |
| 3587.558898                         | 3268.091104                                        | 2840.670376                       | 4653.273434 |             |                |        |             |
| 3232.106793                         | 0.52587615                                         | 0.000174522                       | 0.003066568 |             |                | RBBP4  |             |
| 1                                   | 32651142                                           | 32686211                          | +           | 9470        |                |        |             |
| protein_coding                      | "RB binding protein 4, chromatin remodeling factor |                                   |             |             |                |        |             |
| [Source:HGNC Symbol;Acc:HGNC:9887]" | -                                                  | 5295                              | 4771        | 4244        |                |        |             |
| 3463                                | 2863                                               | 3293                              | 27.3807077  | 23.87183909 |                |        |             |
| 27.88253415                         | 20.31957201                                        | 18.58312419                       | 16.16861314 |             |                |        |             |
| ENSG00000107249                     | 591.5276298                                        | 543.387024                        | 784.6818637 |             |                |        |             |
| 397.811902                          | 311.6272691                                        | 365.7589552                       | 639.8655058 |             |                |        |             |
| 358.3993754                         | 0.834253488                                        | 0.000174686                       | 0.003066568 |             |                | GLIS3  |             |
| 9                                   | 3824127                                            | 4348392                           | -           | 11826       | protein_coding | GLIS   |             |
| family zinc finger 3                | [Source:HGNC Symbol;Acc:HGNC:28510]                |                                   |             |             |                | zf-    |             |
| C2H2                                | 652                                                | 614                               | 675         | 384         | 273            | 424    | 2.699842345 |

|                        |                                                       |             |             |             |  |
|------------------------|-------------------------------------------------------|-------------|-------------|-------------|--|
|                        | 2.460123657                                           | 3.55118048  | 1.804286058 | 1.418966468 |  |
|                        | 1.667089822                                           |             |             |             |  |
| ENSG00000173744        | 1706.539067                                           | 1556.706474 | 1589.126085 |             |  |
| 2387.907381            | 2163.127014                                           | 2377.433209 | 1617.457209 |             |  |
| 2309.489201            | -0.513950013                                          | 0.000174747 | 0.003066568 | AGFG1       |  |
| 2                      | 227472152                                             | 227561214   | + 9321      |             |  |
| protein_coding         | ArfGAP with FG repeats 1 [Source:HGNC                 |             |             |             |  |
| Symbol;Acc:HGNC:5175]  | -                                                     | 1881 1759   | 1367 2305   | 1895        |  |
| 2756                   | 9.88223031                                            | 8.94189925  | 9.124579369 |             |  |
| 13.74106726            | 12.49666324                                           | 13.74825958 |             |             |  |
| ENSG00000104695        | 1819.945438                                           | 2058.498726 | 2059.935204 |             |  |
| 2686.266307            | 2827.475258                                           | 2896.741914 | 1979.459789 |             |  |
| 2803.494493            | -0.502361478                                          | 0.000175179 | 0.003071098 | PPP2CB      |  |
| 8                      | 30774457                                              | 30814314    | - 4516      |             |  |
| protein_coding         | protein phosphatase 2 catalytic subunit beta          |             |             |             |  |
| [Source:HGNC           | Symbol;Acc:HGNC:9300]                                 | -           | 2006 2326   | 1772        |  |
| 2593                   | 2477 3358                                             | 21.75232478 | 24.4051914  |             |  |
| 24.41274591            | 31.90513798                                           | 33.7147104  | 34.57464875 |             |  |
| ENSG00000180891        | 1355.432943                                           | 1308.022836 | 1338.027889 |             |  |
| 924.0838975            | 848.1284283                                           | 929.0622518 | 1333.82789  |             |  |
| 900.4248592            | 0.566493827                                           | 0.000175628 | 0.003075929 | CUEDC1      |  |
| 17                     | 57861243                                              | 57955323    | - 5577      |             |  |
| protein_coding         | CUE domain containing 1 [Source:HGNC                  |             |             |             |  |
| Symbol;Acc:HGNC:31350] | -                                                     | 1494 1478   | 1151 892    | 743         |  |
| 1077                   | 13.11833256                                           | 12.55741452 | 12.84048789 |             |  |
| 8.887431236            | 8.189087838                                           | 8.979374335 |             |             |  |
| ENSG00000237973        | 137.9021468                                           | 143.3692148 | 77.88694054 |             |  |
| 186.4743291            | 335.5985975                                           | 376.1106237 | 119.7194341 |             |  |
| 299.3945168            | -1.318924419                                          | 0.000176253 | 0.003083818 |             |  |
| MTC01P12               | 1 631074                                              | 632616 +    | 1543        |             |  |
| unprocessed_pseudogene | MT-C01 pseudogene 12 [Source:HGNC                     |             |             |             |  |
| Symbol;Acc:HGNC:52014] | -                                                     | 152 162     | 67 180      | 294         |  |
| 436                    | 4.823989407                                           | 4.974798896 | 2.701566879 |             |  |
| 6.482143225            | 11.711938                                             | 13.13867534 |             |             |  |
| ENSG00000196659        | 189.6154519                                           | 201.7788949 | 211.5734803 |             |  |
| 342.9055718            | 326.4666629                                           | 577.9681603 | 200.9892757 |             |  |
| 415.7801317            | -1.051136923                                          | 0.000176518 | 0.003085401 | TTC30B      |  |
| 2                      | 177548998                                             | 177553014   | - 4017      |             |  |
| protein_coding         | tetratricopeptide repeat domain 30B [Source:HGNC      |             |             |             |  |
| Symbol;Acc:HGNC:26425] | -                                                     | 209 228     | 182 331     | 286         |  |
| 670                    | 2.547845787                                           | 2.689425114 | 2.818878796 |             |  |
| 4.578658003            | 4.376345103                                           | 7.755396192 |             |             |  |
| ENSG00000072501        | 5915.276298                                           | 5248.021258 | 5746.196225 |             |  |
| 4607.987865            | 3306.901826                                           | 3524.743139 | 5636.497927 |             |  |
| 3813.210944            | 0.563751956                                           | 0.00017679  | 0.003087101 | SMC1A       |  |
| X                      | 53374149                                              | 53422728    | - 10484     |             |  |
| protein_coding         | structural maintenance of chromosomes 1A [Source:HGNC |             |             |             |  |
| Symbol;Acc:HGNC:11111] | -                                                     | 6520 5930   | 4943 4448   | 2897        |  |
| 4086                   | 30.45434526                                           | 26.80119274 | 29.33394307 |             |  |
| 23.57489733            | 16.98512875                                           | 18.12184319 |             |             |  |

|                        |                                                       |                  |                    |       |  |
|------------------------|-------------------------------------------------------|------------------|--------------------|-------|--|
| ENSG0000064393         | 1956.033083                                           | 1695.650713      | 1521.70157         |       |  |
| 2374.43979             | 2539.819318                                           | 2704.373407      | 1724.461789        |       |  |
| 2539.544172            | -0.558045427                                          | 0.000178088      | 0.003103797        | HIPK2 |  |
| 7                      | 139561570                                             | 139777778        | - 15402            |       |  |
| protein_coding         | homeodomain interacting protein kinase 2 [Source:HGNC |                  |                    |       |  |
| Symbol;Acc:HGNC:14402] | -                                                     | 2156 1916        | 1309 2292          | 2225  |  |
| 3135                   | 6.854887331                                           | 5.89447088       | 5.287731252        |       |  |
| 8.268934235            | 8.879740137                                           | 9.464364203      |                    |       |  |
| ENSG00000102241        | 3433.944906                                           | 3085.978099      | 3163.139779        |       |  |
| 2458.353238            | 2277.276197                                           | 2080.685377      | 3227.687595        |       |  |
| 2272.104938            | 0.506756351                                           | 0.000178097      | 0.003103797        |       |  |
| HTATSF1 X              | 136497079                                             | 136512346        | + 3136             |       |  |
| protein_coding         | HIV-1 Tat specific factor 1 [Source:HGNC              |                  |                    |       |  |
| Symbol;Acc:HGNC:5276]  | -                                                     | 3785 3487        | 2721 2373          | 1995  |  |
| 2412                   | 59.10422314                                           | 52.68686214      | 53.98328818        |       |  |
| 42.04687539            | 39.1033717                                            | 35.76286206      |                    |       |  |
| ENSG00000279095        | 170.5631816                                           | 206.2038707      | 106.9492318        |       |  |
| 323.2221704            | 386.9657298                                           | 332.1160324      | 161.2387614        |       |  |
| 347.4346442            | -1.102858344                                          | 0.00017949       | 0.003125002        |       |  |
| AC243964.3             | 19 44664131                                           | 44666158         | + 2028             |       |  |
| TEC                    | TEC -                                                 | 188 233          | 92 312             | 339   |  |
| 385                    | 4.539610399                                           | 5.443953553      | 2.82245303         |       |  |
| 8.548672647            | 10.27493558                                           | 8.827216877      |                    |       |  |
| ENSG00000143479        | 626.9104175                                           | 459.3124845      | 394.0846693        |       |  |
| 729.3218204            | 867.5337894                                           | 1050.694357      | 493.4358571        |       |  |
| 882.5166557            | -0.837974597                                          | 0.000181823      | 0.003162512        | DYRK3 |  |
| 1                      | 206635536                                             | 206684419        | + 4336             |       |  |
| protein_coding         | dual specificity tyrosine phosphorylation regulated   |                  |                    |       |  |
| kinase 3 [Source:HGNC  | Symbol;Acc:HGNC:3094]                                 | -                | 691 519            |       |  |
| 339                    | 704 760                                               | 1218 7.804003534 | 5.671586044        |       |  |
| 4.864265498            | 9.021846409                                           | 10.77386871      | 13.06137904        |       |  |
| ENSG00000186594        | 303.0218226                                           | 282.3134538      | 141.8239813        |       |  |
| 406.09965              | 675.7631623                                           | 504.6438415      | 242.3864193        |       |  |
| 528.8355513            | -1.121713105                                          | 0.00018456       | 0.003206962        |       |  |
| MIR22HG 17             | 1711493 1717174                                       | - 2986           | lincRNA MIR22 host |       |  |
| gene [Source:HGNC      | Symbol;Acc:HGNC:28219]                                | -                | 334 319            |       |  |
| 122                    | 392 592                                               | 585 5.477537342  | 5.062060373        |       |  |
| 2.542007771            | 7.294714636                                           | 12.1865076       | 9.109553291        |       |  |
| ENSG00000177000        | 257.6592743                                           | 445.152562       | 309.2227789        |       |  |
| 542.8474913            | 721.4228354                                           | 644.3913668      | 337.3448717        |       |  |
| 636.2205645            | -0.914170087                                          | 0.000184882      | 0.003209396        | MTHFR |  |
| 1                      | 11785723                                              | 11806920         | - 11978            |       |  |
| protein_coding         | methylenetetrahydrofolate reductase [Source:HGNC      |                  |                    |       |  |
| Symbol;Acc:HGNC:7436]  | -                                                     | 284 503          | 266 524            | 632   |  |
| 747                    | 1.161081525                                           | 1.989803164      | 1.381669512        |       |  |
| 2.43085482             | 3.243247782                                           | 2.899795097      |                    |       |  |
| ENSG00000101463        | 156.9544171                                           | 123.8993214      | 146.4739479        |       |  |
| 39.36680281            | 34.24475485                                           | 0.862639045      | 142.4425621        |       |  |
| 24.82473223            | 2.53221037                                            | 0.000185376      | 0.003214816        |       |  |
| SYNDIG1 20             | 24469199                                              | 24666616         | + 2847             |       |  |

|                                      |                                                        |             |             |             |      |        |
|--------------------------------------|--------------------------------------------------------|-------------|-------------|-------------|------|--------|
| protein_coding                       | synapse differentiation inducing 1 [Source:HGNC        |             |             |             |      |        |
| Symbol;Acc:HGNC:15885]               | -                                                      | 173         | 140         | 126         | 38   | 30     |
| 1                                    | 2.975687492                                            | 2.33005949  | 2.75353071  |             |      |        |
| 0.741665663                          | 0.647710814                                            | 0.016332157 |             |             |      |        |
| ENSG00000131899                      | 2545.746211                                            | 2698.350222 | 3021.315798 |             |      |        |
| 1914.469779                          | 2052.402307                                            | 1767.547404 | 2755.13741  |             |      |        |
| 1911.473163                          | 0.527495933                                            | 0.000185966 | 0.003221895 |             |      | LLGL1  |
| 17                                   | 18225587                                               | 18244875    | +           | 6638        |      |        |
| protein_coding                       | "LLGL1, scribble cell polarity complex component       |             |             |             |      |        |
| [Source:HGNC Symbol;Acc:HGNC:6628]"  | -                                                      | 2806        | 3049        |             |      | 2599   |
| 1848                                 | 1798                                                   | 2049        | 20.70041738 | 21.76439589 |      |        |
| 24.35992114                          | 15.4695173                                             | 16.64944647 | 14.3527701  |             |      |        |
| ENSG00000245532                      | 4277.688305                                            | 5623.259203 | 3005.040915 |             |      |        |
| 6011.725176                          | 7727.899677                                            | 7483.393718 | 4301.996141 |             |      |        |
| 7074.339523                          | -0.717238787                                           | 0.000188146 | 0.003256189 |             |      | NEAT1  |
| 11                                   | 65422774                                               | 65445540    | +           | 22767       |      |        |
| lincRNA                              | nuclear paraspeckle assembly transcript 1 [Source:HGNC |             |             |             |      |        |
| Symbol;Acc:HGNC:30815]               | -                                                      | 4715        | 6354        | 2585        | 5803 | 6770   |
| 8675                                 | 10.14155553                                            | 13.22415235 | 7.064177229 |             |      |        |
| 14.16311582                          | 18.27806516                                            | 17.71718394 |             |             |      |        |
| ENSG00000131116                      | 422.7789501                                            | 723.0410401 | 757.9445557 |             |      |        |
| 265.2079347                          | 404.0881072                                            | 288.1214411 | 634.588182  |             |      |        |
| 319.139161                           | 0.992240629                                            | 0.000188314 | 0.003256189 |             |      | ZNF428 |
| 19                                   | 43607219                                               | 43619874    | -           | 1803        |      |        |
| protein_coding                       | zinc finger protein 428 [Source:HGNC                   |             |             |             |      |        |
| Symbol;Acc:HGNC:20804]               | -                                                      | 466         | 817         | 652         | 256  | 354    |
| 334                                  | 12.656653                                              | 21.47102466 | 22.49876687 |             |      |        |
| 7.889623563                          | 12.06854448                                            | 8.613541653 |             |             |      |        |
| ENSG00000163590                      | 301.2073207                                            | 292.0484005 | 217.3859385 |             |      |        |
| 522.1281214                          | 554.7650285                                            | 422.6931322 | 270.2138866 |             |      |        |
| 499.862094                           | -0.884286615                                           | 0.000188903 | 0.003261425 |             |      | PPM1L  |
| 3                                    | 160755602                                              | 161078907   | +           | 12447       |      |        |
| protein_coding                       | "protein phosphatase, Mg2+/Mn2+ dependent 1L           |             |             |             |      |        |
| [Source:HGNC Symbol;Acc:HGNC:16381]" | -                                                      | 332         | 330         |             |      | 187    |
| 504                                  | 486                                                    | 490         | 1.306177137 | 1.25624889  |      |        |
| 0.934724796                          | 2.249976026                                            | 2.400042542 | 1.830469128 |             |      |        |
| ENSG00000168913                      | 0                                                      | 0.884995153 | 0           | 40.4027713  |      |        |
| 18.26386925                          | 12.07694663                                            | 0.294998384 |             |             |      |        |
| 23.58119573                          | -6.072247533                                           | 0.000188985 | 0.003261425 |             |      | ENHO   |
| 9                                    | 34521040                                               | 34523041    | -           | 1082        |      |        |
| protein_coding                       | energy homeostasis associated [Source:HGNC             |             |             |             |      |        |
| Symbol;Acc:HGNC:24838]               | -                                                      | 0           | 1           | 0           | 39   | 16     |
| 14                                   | 0                                                      | 0.043792444 | 0           | 2.002854451 |      |        |
| 0.908950184                          | 0.601633199                                            |             |             |             |      |        |
| ENSG00000008441                      | 3364.993833                                            | 2524.006177 | 3638.598864 |             |      |        |
| 2323.677334                          | 1961.082961                                            | 1932.311461 | 3175.866291 |             |      |        |
| 2072.357252                          | 0.615625441                                            | 0.000189286 | 0.003263436 |             |      | NFIX   |
| 19                                   | 12995608                                               | 13098796    | +           | 6302        |      |        |
| protein_coding                       | nuclear factor I X [Source:HGNC Symbol;Acc:HGNC:7788]  |             |             |             |      |        |
| CTF/NFI                              | 3709                                                   | 2852        | 3130        | 2243        | 1718 | 2240   |

|                                                              |                                                       |               |                 |                |      |
|--------------------------------------------------------------|-------------------------------------------------------|---------------|-----------------|----------------|------|
| 28.82087209                                                  | 21.44359337                                           | 30.90101788   | 19.77711407     |                |      |
| 16.75683992                                                  | 16.52725156                                           |               |                 |                |      |
| ENSG00000174233                                              | 806.5461088                                           | 738.9709529   | 1005.555277     |                |      |
| 466.1858227                                                  | 578.7363569                                           | 481.3525873   | 850.3574463     |                |      |
| 508.7582556                                                  | 0.74087207                                            | 0.000191295   | 0.003294855     | ADCY6          |      |
| 12                                                           | 48766194                                              | 48789037      | - 8410          |                |      |
| protein_coding                                               | adenylate cyclase 6 [Source:HGNC Symbol;Acc:HGNC:237] |               |                 |                |      |
| -                                                            | 889 835                                               | 865 450       | 507 558         |                |      |
| 5.176478907                                                  | 4.704537347                                           | 6.399218779   | 2.973230379     |                |      |
| 3.705606707                                                  | 3.085099826                                           |               |                 |                |      |
| ENSG00000063177                                              | 13172.37678                                           | 17557.41884   | 19168.32482     |                |      |
| 21384.46167                                                  | 26027.15517                                           | 27105.84408   | 16632.70681     |                |      |
| 24839.15364                                                  | -0.578667858                                          | 0.000193609   | 0.003331465     | RPL18          |      |
| 19                                                           | 48615328                                              | 48619536      | - 4209          |                |      |
| protein_coding                                               | ribosomal protein L18 [Source:HGNC                    |               |                 |                |      |
| Symbol;Acc:HGNC:10310]                                       | -                                                     | 14519 19839   | 16489 20642     | 22801          |      |
| 31422                                                        | 168.9220966                                           | 223.3404015   | 243.7374363     |                |      |
| 272.511536                                                   | 332.9832049                                           | 347.1250191   |                 |                |      |
| ENSG00000091137                                              | 110.6846178                                           | 74.33959286   | 87.18687374     |                |      |
| 21.75533839                                                  | 15.98088559                                           | 0 90.73702815 | 12.57874133     |                |      |
| 2.868036452                                                  | 0.000194299                                           | 0.0033401     | SLC26A4 7       |                |      |
| 107660635                                                    | 107717809                                             | +             | 5800            | protein_coding |      |
|                                                              | solute carrier family 26 member 4 [Source:HGNC        |               |                 |                |      |
| Symbol;Acc:HGNC:8818]                                        | -                                                     | 122 84        | 75 21           | 14             |      |
| 0                                                            | 1.030055252                                           | 0.686242693   | 0.80452606      |                |      |
| 0.201188589                                                  | 0.148370446                                           | 0             |                 |                |      |
| ENSG00000002586                                              | 4064.484328                                           | 5263.066176   | 6814.526052     |                |      |
| 3573.055339                                                  | 3347.995532                                           | 3447.105625   | 5380.692185     |                |      |
| 3456.052165                                                  | 0.63835796                                            | 0.000194757   | 0.003344154     | CD99           |      |
| X                                                            | 2691133 2741309                                       | +             | 4912            | protein_coding | CD99 |
| molecule (Xg blood group) [Source:HGNC Symbol;Acc:HGNC:7082] | -                                                     |               |                 |                |      |
| 4480                                                         | 5947 5862                                             | 3449 2933     | 3996 44.6630461 |                |      |
| 57.3675128                                                   | 74.2496315                                            | 39.01637169   | 36.70295786     |                |      |
| 37.82667251                                                  |                                                       |               |                 |                |      |
| ENSG00000162231                                              | 1504.222102                                           | 1627.506087   | 1406.614896     |                |      |
| 2238.727917                                                  | 1927.979698                                           | 2895.879275   | 1512.781028     |                |      |
| 2354.19563                                                   | -0.638311588                                          | 0.000194913   | 0.003344154     | NXF1           |      |
| 11                                                           | 62792123                                              | 62806302      | - 6194          |                |      |
| protein_coding                                               | nuclear RNA export factor 1 [Source:HGNC              |               |                 |                |      |
| Symbol;Acc:HGNC:8071]                                        | -                                                     | 1658 1839     | 1210 2161       | 1689           |      |
| 3357                                                         | 13.1081683                                            | 14.06814931   | 12.15404992     |                |      |
| 19.38633037                                                  | 16.76122704                                           | 25.20061609   |                 |                |      |
| ENSG00000076201                                              | 2208.248851                                           | 2381.521957   | 2229.658984     |                |      |
| 2869.632731                                                  | 3260.100661                                           | 3807.688746   | 2273.143264     |                |      |
| 3312.474046                                                  | -0.543401668                                          | 0.000196288   | 0.003364476     | PTPN23         |      |
| 3                                                            | 47381011                                              | 47413441      | + 5981          |                |      |
| protein_coding                                               | "protein tyrosine phosphatase, non-receptor type 23   |               |                 |                |      |
| [Source:HGNC Symbol;Acc:HGNC:14406]"                         | -                                                     |               | 2434 2691       | 1918           |      |
| 2770                                                         | 2856 4414                                             | 19.92853873   | 21.31897578     |                |      |
| 19.95177998                                                  | 25.73463484                                           | 29.35159869   | 34.31543784     |                |      |

|                        |                                                    |             |             |             |                |        |
|------------------------|----------------------------------------------------|-------------|-------------|-------------|----------------|--------|
| ENSG00000198483        | 264.9172821                                        |             | 347.8030952 |             | 311.5477622    |        |
| 143.9996208            | 180.3557089                                        |             | 119.9068273 |             | 308.0893798    |        |
| 148.0873856            | 1.059931103                                        |             | 0.00019758  |             | 0.003383346    |        |
| ANKRD35 1              | 145866560                                          |             | 145885866   | -           | 3363           |        |
| protein_coding         | ankyrin repeat domain 35 [Source:HGNC              |             |             |             |                |        |
| Symbol;Acc:HGNC:26323] | -                                                  |             | 292         | 393         | 268            | 139    |
| 139                    | 4.251915918                                        |             | 5.537224399 |             | 4.958094195    | 158    |
| 2.296677293            | 2.887869605                                        |             | 1.921847624 |             |                |        |
| ENSG00000083444        | 3701.583941                                        |             | 4578.079927 |             | 5833.383099    |        |
| 2923.503093            | 3434.748911                                        |             | 2680.219514 |             | 4704.348989    |        |
| 3012.823839            | 0.642834945                                        |             | 0.000198759 |             | 0.003400246    | PL0D1  |
| 1                      | 11934205                                           |             | 11975538    | +           | 5320           |        |
| protein_coding         | "procollagen-lysine,2-oxoglutarate 5-dioxygenase 1 |             |             |             |                |        |
| [Source:HGNC           | Symbol;Acc:HGNC:9081]"                             |             |             |             |                |        |
| 2822                   | 3009                                               | 3107        | 37.55581701 |             | 46.07414523    | 5018   |
| 58.68483276            | 29.4752448                                         |             | 34.76625535 |             | 27.1556773     |        |
| ENSG00000188641        | 1858.049978                                        |             | 1346.962623 |             | 1990.185705    |        |
| 1365.406476            | 740.8281965                                        |             | 658.1935915 |             | 1731.732769    |        |
| 921.4760881            | 0.910268204                                        |             | 0.000203058 |             | 0.003470245    | DPYD   |
| 1                      | 97077743                                           |             | 97995000    | -           | 7131           |        |
| protein_coding         | dihydropyrimidine dehydrogenase [Source:HGNC       |             |             |             |                |        |
| Symbol;Acc:HGNC:3012]  | -                                                  |             | 2048        | 1522        | 1712           | 1318   |
| 763                    | 14.06397868                                        |             | 10.11324799 |             | 14.93688958    | 649    |
| 10.27015546            | 5.59424678                                         |             | 4.975137862 |             |                |        |
| ENSG00000120658        | 103.4266101                                        |             | 157.5291373 |             | 224.3608884    |        |
| 302.5028005            | 413.2200418                                        |             | 362.308399  |             | 161.7722119    |        |
| 359.3437471            | -1.155241759                                       |             | 0.000203243 |             | 0.003470245    | ENOX1  |
| 13                     | 43213518                                           |             | 43786908    | -           | 3101           |        |
| protein_coding         | ecto-NOX disulfide-thiol exchanger 1 [Source:HGNC  |             |             |             |                |        |
| Symbol;Acc:HGNC:25474] | -                                                  |             | 114         | 178         | 193            | 292    |
| 420                    | 1.800245644                                        |             | 2.719848269 |             | 3.872241092    | 362    |
| 5.232305928            | 7.175532974                                        |             | 6.297650316 |             |                |        |
| ENSG00000086475        | 1589.503692                                        |             | 1563.786436 |             | 1859.98664     |        |
| 1168.572462            | 1101.539614                                        |             | 1131.782427 |             | 1671.092256    |        |
| 1133.964835            | 0.558809431                                        |             | 0.000204499 |             | 0.003488314    | SEPHS1 |
| 10                     | 13317424                                           |             | 13348298    | -           | 3888           |        |
| protein_coding         | selenophosphate synthetase 1 [Source:HGNC          |             |             |             |                |        |
| Symbol;Acc:HGNC:19685] | -                                                  |             | 1752        | 1767        | 1600           | 1128   |
| 1312                   | 22.06665622                                        |             | 21.53459627 |             | 25.60357284    | 965    |
| 16.12110798            | 15.2562718                                         |             | 15.69056553 |             |                |        |
| ENSG00000124784        | 1892.525515                                        |             | 1838.134933 |             | 1569.363727    |        |
| 2622.036261            | 2360.605101                                        |             | 2694.884377 |             | 1766.674725    |        |
| 2559.175246            | -0.53433122                                        |             | 0.000204785 |             | 0.003489825    | RIOK1  |
| 6                      | 7389496                                            | 7418037     | +           | 3237        | protein_coding | RI0    |
| kinase 1 [Source:HGNC  | Symbol;Acc:HGNC:18656]                             |             |             |             |                |        |
| 1350                   | 2531                                               | 2068        | 3124        | 31.55733268 | 30.40326591    | 2077   |
| 25.9476431             |                                                    | 43.44716962 |             | 39.26948405 | 44.8744712     |        |
| ENSG00000146950        | 409.1701857                                        |             | 248.683638  |             | 281.3229793    |        |
| 178.1865811            | 127.8470848                                        |             | 119.9068273 |             | 313.0589343    |        |
| 141.9801644            | 1.142052857                                        |             | 0.000205349 |             | 0.003496076    |        |

|                        |                                                       |                               |             |      |                |        |
|------------------------|-------------------------------------------------------|-------------------------------|-------------|------|----------------|--------|
| SHROOM2 X              | 9786456                                               | 9949443                       | +           | 8191 | protein_coding | shroom |
| family member 2        | [Source:HGNC Symbol;Acc:HGNC:630]                     |                               |             |      | -              | 451    |
| 281                    | 242                                                   | 172                           | 112         | 139  | 2.696300545    |        |
| 1.625533166            | 1.838168361                                           |                               | 1.166819194 |      | 0.840482077    |        |
| 0.789057937            |                                                       |                               |             |      |                |        |
| ENSG00000148411        | 535.2780699                                           |                               | 498.2522712 |      | 611.4706078    |        |
| 356.3731622            | 310.4857773                                           |                               | 271.7312993 |      | 548.3336497    |        |
| 312.8634129            | 0.809681221                                           |                               | 0.00020579  |      | 0.003500214    | NACC2  |
| 9                      | 136006537                                             |                               | 136095285   |      | - 7212         |        |
| protein_coding         | NACC family member 2 [Source:HGNC                     |                               |             |      |                |        |
| Symbol;Acc:HGNC:23846] | -                                                     | 590                           | 563         | 526  | 344            | 272    |
| 315                    | 4.006129437                                           |                               | 3.698955594 |      | 4.537711416    |        |
| 2.650420416            | 2.318251483                                           |                               | 2.030887441 |      |                |        |
| ENSG00000116830        | 2092.120728                                           |                               | 1662.020898 |      | 1655.388109    |        |
| 1443.104113            | 856.1188711                                           |                               | 714.2651295 |      | 1803.176578    |        |
| 1004.496038            | 0.844647852                                           |                               | 0.000208928 |      | 0.003550167    | TTF2   |
| 1                      | 117060303                                             |                               | 117107453   |      | + 10181        |        |
| protein_coding         | transcription termination factor 2 [Source:HGNC       |                               |             |      |                |        |
| Symbol;Acc:HGNC:12398] | -                                                     | 2306                          | 1878        | 1424 | 1393           | 750    |
| 828                    | 11.09168556                                           |                               | 8.740405695 |      | 8.702146663    |        |
| 7.602785235            | 4.528122696                                           |                               | 3.78155932  |      |                |        |
| ENSG00000058799        | 470.8632513                                           |                               | 492.0573051 |      | 548.6960587    |        |
| 671.3075847            | 886.9391505                                           |                               | 973.0568431 |      | 503.8722051    |        |
| 843.7678594            | -0.744959038                                          |                               | 0.000209951 |      | 0.003564131    | YIPF1  |
| 1                      | 53851719                                              |                               | 53889834    |      | - 2072         |        |
| protein_coding         | Yip1 domain family member 1 [Source:HGNC              |                               |             |      |                |        |
| Symbol;Acc:HGNC:25231] | -                                                     | 519                           | 556         | 472  | 648            | 777    |
| 1128                   | 12.26609405                                           |                               | 12.71485703 |      | 14.17291212    |        |
| 17.37790019            | 23.05040858                                           |                               | 25.31339329 |      |                |        |
| ENSG00000242299        | 244.0505098                                           |                               | 443.3825717 |      | 402.2221109    |        |
| 743.8253793            | 665.4897358                                           |                               | 621.1001126 |      | 363.2183975    |        |
| 676.8050759            | -0.898375948                                          |                               | 0.000210472 |      | 0.003567495    |        |
| AC073861.1             | 3                                                     | 101576489                     | 101576947   |      | -              | 459    |
|                        | processed_pseudogene                                  | ribosomal protein S18 (RPS18) |             |      |                |        |
| pseudogene             | -                                                     | 269                           | 501         | 346  | 718            | 583    |
| 28.69910003            | 51.7191622                                            |                               | 46.89972108 |      | 86.92081752    |        |
| 78.07342457            | 72.93749255                                           |                               |             |      |                |        |
| ENSG00000188766        | 224.0909886                                           |                               | 232.7537253 |      | 265.0480962    |        |
| 344.9775088            | 454.3137476                                           |                               | 613.3363612 |      | 240.6309367    |        |
| 470.8758725            | -0.970760333                                          |                               | 0.000210694 |      | 0.003567495    | SPRED3 |
| 19                     | 38388421                                              |                               | 38399587    |      | + 5864         |        |
| protein_coding         | sprouty related EVH1 domain containing 3 [Source:HGNC |                               |             |      |                |        |
| Symbol;Acc:HGNC:31041] | -                                                     | 247                           | 263         | 228  | 333            | 398    |
| 711                    | 2.062679133                                           |                               | 2.125143337 |      | 2.419066081    |        |
| 3.155457357            | 4.171924791                                           |                               | 5.637760951 |      |                |        |
| ENSG00000025039        | 33.56828574                                           |                               | 26.54985459 |      | 34.8747495     |        |
| 105.6687865            | 90.17785443                                           |                               | 113.0057149 |      | 31.66429661    |        |
| 102.9507853            | -1.704729535                                          |                               | 0.000210754 |      | 0.003567495    | RRAGD  |
| 6                      | 89364636                                              |                               | 89412270    |      | - 5072         |        |
| protein_coding         | Ras related GTP binding D [Source:HGNC                |                               |             |      |                |        |

|                                     |                                                 |             |             |             |      |             |
|-------------------------------------|-------------------------------------------------|-------------|-------------|-------------|------|-------------|
| Symbol;Acc:HGNC:19903]              | -                                               | 37          | 30          | 30          | 102  | 79          |
| 131                                 | 0.357232664                                     | 0.280264732 | 0.368000879 |             |      |             |
| 1.117462532                         | 0.957403932                                     | 1.200944863 |             |             |      |             |
| ENSG00000102158                     | 2531.230195                                     | 2167.35313  | 2512.144455 |             |      |             |
| 1976.627888                         | 1188.292993                                     | 1133.507705 | 2403.575927 |             |      |             |
| 1432.809529                         | 0.746450868                                     | 0.000211062 | 0.003569291 |             |      | MAGT1       |
| X                                   | 77826364                                        | 77895593    | -           | 4862        |      |             |
| protein_coding                      | magnesium transporter 1 [Source:HGNC            |             |             |             |      |             |
| Symbol;Acc:HGNC:28880]              | -                                               | 2790        | 2449        | 2161        | 1908 | 1041        |
| 1314                                | 28.10075136                                     | 23.867134   | 27.6532805  |             |      |             |
| 21.80597247                         | 13.16082563                                     | 12.56641589 |             |             |      |             |
| ENSG00000122863                     | 537.9998228                                     | 537.1920579 | 652.1578156 |             |      |             |
| 298.3589265                         | 222.5909065                                     | 393.3634046 | 575.7832321 |             |      |             |
| 304.7710792                         | 0.914335704                                     | 0.000211519 | 0.003571669 |             |      | CHST3       |
| 10                                  | 71964365                                        | 72013564    | +           | 6970        |      |             |
| protein_coding                      | carbohydrate sulfotransferase 3 [Source:HGNC    |             |             |             |      |             |
| Symbol;Acc:HGNC:1971]               | -                                               | 593         | 607         | 561         | 288  | 195         |
| 456                                 | 4.166300577                                     | 4.126504792 | 5.007684161 |             |      |             |
| 2.295999311                         | 1.71968615                                      | 3.042027128 |             |             |      |             |
| ENSG00000109332                     | 4795.728606                                     | 5330.325807 | 5006.851536 |             |      |             |
| 6364.990433                         | 7112.635581                                     | 7323.805494 | 5044.301983 |             |      |             |
| 6933.810503                         | -0.459010989                                    | 0.000211607 | 0.003571669 |             |      | UBE2D3      |
| 4                                   | 102794383                                       | 102868896   | -           | 10069       |      |             |
| protein_coding                      | ubiquitin conjugating enzyme E2 D3 [Source:HGNC |             |             |             |      |             |
| Symbol;Acc:HGNC:12476]              | -                                               | 5286        | 6023        | 4307        | 6144 | 6231        |
| 8490                                | 25.70807164                                     | 28.34346639 | 26.61309459 |             |      |             |
| 33.90602749                         | 38.03809604                                     | 39.20598483 |             |             |      |             |
| ENSG00000132357                     | 163.3051739                                     | 142.4842197 | 188.3236473 |             |      |             |
| 337.7257293                         | 300.2123508                                     | 326.9401982 | 164.7043469 |             |      |             |
| 321.6260928                         | -0.968079459                                    | 0.0002129   | 0.003590073 |             |      | CARD6       |
| 5                                   | 40841184                                        | 40860175    | +           | 4399        |      |             |
| protein_coding                      | caspase recruitment domain family member 6      |             |             |             |      |             |
| [Source:HGNC Symbol;Acc:HGNC:16394] | -                                               |             | 180         | 161         |      | 162         |
| 326                                 | 263                                             | 379         | 2.003767031 | 1.734196698 |      |             |
| 2.291225843                         | 4.117898917                                     | 3.67493064  | 4.006049084 |             |      |             |
| ENSG00000146834                     | 2161.071801                                     | 2519.581201 | 2014.598029 |             |      |             |
| 2612.712544                         | 3661.905785                                     | 4545.24513  | 2231.750344 |             |      |             |
| 3606.621153                         | -0.692467766                                    | 0.000214431 | 0.003612447 |             |      | MEPCE       |
| 7                                   | 100428790                                       | 100434126   | +           | 3420        |      |             |
| protein_coding                      | methylphosphate capping enzyme [Source:HGNC     |             |             |             |      |             |
| Symbol;Acc:HGNC:20247]              | -                                               | 2382        | 2847        | 1733        | 2522 | 3208        |
| 5269                                | 34.10706388                                     | 39.44462231 | 31.52675728 |             |      |             |
| 40.97613763                         | 57.65747426                                     | 71.63629408 |             |             |      |             |
| ENSG00000112578                     | 1428.920271                                     | 1920.439482 | 1723.975117 |             |      |             |
| 1876.138944                         | 3189.328168                                     | 3684.331362 | 1691.111623 |             |      |             |
| 2916.599492                         | -0.786514487                                    | 0.000214953 | 0.00361779  |             |      | BYSL        |
| 6                                   | 41921188                                        | 41933046    | +           | 2248        |      |             |
| protein_coding                      | bystin like [Source:HGNC Symbol;Acc:HGNC:1157]  |             |             |             |      |             |
| 1575                                | 2170                                            | 1483        | 1811        | 2794        | 4271 | 34.30938511 |
| 45.73933728                         | 41.04419013                                     | 44.76454629 | 76.39720235 |             |      |             |



|                                     |                                                  |          |             |  |             |        |
|-------------------------------------|--------------------------------------------------|----------|-------------|--|-------------|--------|
|                                     | 88.34140105                                      |          |             |  |             |        |
| ENSG00000088305                     | 137.9021468                                      |          | 125.6693117 |  | 149.9614228 |        |
| 60.0861727                          | 46.80116496                                      |          | 43.13195226 |  | 137.8442938 |        |
| 50.00642997                         | 1.46348735                                       |          | 0.0002166   |  | 0.003642055 | DNMT3B |
| 20                                  | 32762385                                         |          | 32809356    |  | + 4630      |        |
| protein_coding                      | DNA methyltransferase 3 beta [Source:HGNC        |          |             |  |             |        |
| Symbol;Acc:HGNC:2979]               | -                                                |          | 152 142     |  | 129 58      | 41     |
| 50                                  | 1.607649169                                      |          | 1.453228124 |  | 1.73346695  |        |
| 0.696079825                         | 0.544314904                                      |          | 0.502134465 |  |             |        |
| ENSG00000260454                     | 27.21752898                                      |          | 6.194966072 |  | 4.6499666   |        |
| 62.15810969                         | 86.75337894                                      |          | 81.08807026 |  | 12.68748722 |        |
| 76.66651963                         | -2.580812978                                     |          | 0.00021693  |  | 0.003644143 |        |
| AL355607.2                          | 9                                                | 90997054 | 91001871    |  | + 1395      |        |
| lincRNA                             | novel transcript                                 |          |             |  |             |        |
| 60                                  | 76                                               | 94       | -           |  | 30 7        | 4      |
| 0.178399088                         | 2.389951493                                      |          | 1.053114835 |  | 0.237766286 |        |
| ENSG00000140350                     | 2139.297778                                      |          | 3.348780984 |  | 3.133175083 |        |
| 1576.744049                         | 1382.346604                                      |          | 2001.859036 |  | 2801.604876 |        |
| 1515.161286                         | 1382.346604                                      |          | 1586.393204 |  | 2314.253897 |        |
| 15                                  | 0.610192297                                      |          | 0.000217473 |  | 0.003649783 | ANP32A |
| 15                                  | 68778535                                         |          | 68820897    |  | - 7544      |        |
| protein_coding                      | acidic nuclear phosphoprotein 32 family member A |          |             |  |             |        |
| [Source:HGNC Symbol;Acc:HGNC:13233] | -                                                |          |             |  | 2358 2262   | 2410   |
| 1522                                | 1211                                             | 1839     | 15.30632056 |  | 14.20749009 |        |
| 19.87568977                         | 11.21050086                                      |          | 9.867106678 |  | 11.33472708 |        |
| ENSG00000171033                     | 674.0874677                                      |          | 712.4210983 |  | 642.8578824 |        |
| 872.2854727                         | 1140.350336                                      |          | 1262.040923 |  | 676.4554828 |        |
| 1091.558911                         | -0.690335632                                     |          | 0.00022068  |  | 0.003700106 | PKIA   |
| 8                                   | 78516139                                         |          | 78605267    |  | + 4216      |        |
| protein_coding                      | cAMP-dependent protein kinase inhibitor alpha    |          |             |  |             |        |
| [Source:HGNC Symbol;Acc:HGNC:9017]  | -                                                |          |             |  | 743 805     | 553    |
| 842                                 | 999                                              | 1463     | 8.630121204 |  | 9.047356823 |        |
| 8.160774466                         | 11.09745859                                      |          | 14.56505893 |  | 16.13521446 |        |
| ENSG00000259431                     | 37.19728961                                      |          | 43.3647625  |  | 23.249833   |        |
| 95.30910153                         | 126.7055929                                      |          | 117.3189102 |  | 34.6039617  |        |
| 113.1112015                         | -1.701079313                                     |          | 0.000220904 |  | 0.003700358 | THTPA  |
| 14                                  | 23555988                                         |          | 23560271    |  | + 2894      |        |
| protein_coding                      | thiamine triphosphatase [Source:HGNC             |          |             |  |             |        |
| Symbol;Acc:HGNC:18987]              | -                                                |          | 41 49       |  | 20 92       | 111    |
| 136                                 | 0.6937676                                        |          | 0.802276358 |  | 0.429970159 |        |
| 1.76644998                          | 2.357609171                                      |          | 2.185100416 |  |             |        |
| ENSG00000144659                     | 1133.156457                                      |          | 1353.157589 |  | 1059.029893 |        |
| 1506.298192                         | 1833.235876                                      |          | 2472.323504 |  | 1181.781313 |        |
| 1937.285857                         | -0.713125411                                     |          | 0.000222968 |  | 0.003731391 |        |
| SLC25A38                            | 3                                                | 39383324 | 39397351    |  | + 2708      |        |
| protein_coding                      | solute carrier family 25 member 38               |          |             |  |             |        |
| [Source:HGNC Symbol;Acc:HGNC:26054] | -                                                |          |             |  | 1249 1529   | 911    |
| 1454                                | 1606                                             | 2866     | 22.5861632  |  | 26.75378707 |        |
| 20.93035351                         | 29.83512008                                      |          | 36.45392042 |  | 49.21058685 |        |
| ENSG00000232679                     | 30.84653284                                      |          | 38.05479158 |  | 20.9248497  |        |
| 139.8557468                         | 77.62144432                                      |          | 100.9287683 |  | 29.94205804 |        |

|                 |                                                     |             |             |                 |        |
|-----------------|-----------------------------------------------------|-------------|-------------|-----------------|--------|
| 106.1353198     | -1.819225231                                        | 0.000224664 | 0.003756225 |                 |        |
| LINC01705       | 1                                                   | 222041705   | 222064763   | -               | 562    |
|                 | lincRNA long intergenic non-protein coding RNA 1705 |             |             |                 |        |
|                 | [Source:HGNC Symbol;Acc:HGNC:52493]                 |             |             |                 |        |
|                 |                                                     |             |             | 34 43           | 18     |
|                 | 135                                                 | 68 117      | 2.962588175 | 3.625422125     |        |
| 1.992705118     | 13.34779403                                         |             | 7.437379756 | 9.68011606      |        |
| ENSG00000182667 | 1451.601546                                         |             | 1279.702991 | 1611.213427     |        |
| 1052.543991     | 933.7403154                                         |             | 686.66068   | 1447.505988     |        |
| 890.9816621     | 0.700623609                                         |             | 0.000225402 | 0.003765005     | NTM    |
|                 | 11                                                  | 131370478   | 132336822   | + 6956          |        |
| protein_coding  | neurotrimin [Source:HGNC Symbol;Acc:HGNC:17941]     |             |             |                 | -      |
|                 | 1600                                                | 1446 1386   | 1016 818    | 796 11.26390795 |        |
|                 | 9.849975731                                         | 12.39682594 | 8.116077366 | 7.228381913     |        |
|                 | 5.32089284                                          |             |             |                 |        |
| ENSG00000139926 | 1956.940334                                         |             | 1614.231159 | 2186.646793     |        |
| 1254.557847     | 1399.468981                                         |             | 961.8425355 | 1919.272762     |        |
| 1205.289788     | 0.671631393                                         |             | 0.000226279 | 0.003776091     | FRMD6  |
|                 | 14                                                  | 51489100    | 51730727    | + 9416          |        |
| protein_coding  | FERM domain containing 6 [Source:HGNC               |             |             |                 |        |
|                 | Symbol;Acc:HGNC:19839]                              |             |             |                 |        |
|                 |                                                     |             | 2157 1824   | 1881 1211       | 1226   |
|                 | 1115                                                | 11.21792104 | 9.178777132 | 12.42879979     |        |
| 7.146439755     | 8.003342091                                         |             | 5.506040933 |                 |        |
| ENSG00000152217 | 305.7435755                                         |             | 216.8238125 | 332.4726119     |        |
| 161.6110852     | 123.2811174                                         |             | 83.67598739 | 285.0133333     |        |
| 122.8560633     | 1.215739033                                         |             | 0.000226531 | 0.00377672      | SETBP1 |
|                 | 18                                                  | 44680173    | 45068510    | + 14025         |        |
| protein_coding  | SET binding protein 1 [Source:HGNC                  |             |             |                 |        |
|                 | Symbol;Acc:HGNC:15573]                              |             |             |                 |        |
|                 |                                                     |             | 337 245     | 286 156         | 108    |
|                 | 97                                                  | 1.1766728   | 0.827731828 | 1.268732339     |        |
| 0.618064461     | 0.473334593                                         |             | 0.321588035 |                 |        |
| ENSG00000081692 | 176.0066874                                         |             | 184.0789918 | 203.4360387     |        |
| 354.3012253     | 315.0517446                                         |             | 393.3634046 | 187.8405727     |        |
| 354.2387915     | -0.917372521                                        |             | 0.000228748 | 0.003809764     | JMJD4  |
|                 | 1                                                   | 227730425   | 227735411   | - 4315          |        |
| protein_coding  | jumonji domain containing 4 [Source:HGNC            |             |             |                 |        |
|                 | Symbol;Acc:HGNC:25724]                              |             |             |                 |        |
|                 |                                                     |             | 194 208     | 175 342         | 276    |
|                 | 456                                                 | 2.201656762 | 2.284067718 | 2.523272155     |        |
| 4.404101806     | 3.931657177                                         |             | 4.913772673 |                 |        |
| ENSG00000144554 | 1411.682503                                         |             | 974.3796636 | 1016.017702     |        |
| 867.1056302     | 482.8510433                                         |             | 450.2975816 | 1134.026623     |        |
| 600.0847517     | 0.918846211                                         |             | 0.000228943 | 0.003809764     | FANCD2 |
|                 | 3                                                   | 10026414    | 10101930    | + 8378          |        |
| protein_coding  | FA complementation group D2 [Source:HGNC            |             |             |                 |        |
|                 | Symbol;Acc:HGNC:3585]                               |             |             |                 |        |
|                 |                                                     |             | 1556 1101   | 874 837         | 423    |
|                 | 522                                                 | 9.09489983  | 6.226921686 | 6.490496547     |        |
| 5.551331288     | 3.103468713                                         |             | 2.897084517 |                 |        |
| ENSG00000263528 | 451.8109811                                         |             | 284.0834442 | 394.0846693     |        |
| 183.3664236     | 178.0727252                                         |             | 208.758649  | 376.6596982     |        |
| 190.0659326     | 0.985183341                                         |             | 0.0002292   | 0.003810447     | IKBKE  |
|                 | 1                                                   | 206470476   | 206496889   | + 3791          |        |

|                                   |                                                       |                                        |             |                              |             |                |
|-----------------------------------|-------------------------------------------------------|----------------------------------------|-------------|------------------------------|-------------|----------------|
| protein_coding                    | inhibitor of nuclear factor kappa B kinase subunit    |                                        |             |                              |             |                |
| epsilon                           | [Source:HGNC Symbol;Acc:HGNC:14552]                   |                                        |             |                              |             |                |
|                                   | -                                                     | 498                                    | 321         |                              |             |                |
|                                   | 339                                                   | 177                                    | 156         | 242                          | 6.432862104 | 4.012154873    |
|                                   | 5.563559799                                           | 2.594367681                            | 2.529403843 | 2.968196165                  |             |                |
| ENSG00000178719                   | 3078.302528                                           | 3849.728916                            | 3805.997662 |                              |             |                |
| 4660.822259                       | 5181.231408                                           | 5559.708647                            | 3578.009702 |                              |             |                |
| 5133.920771                       | -0.521126403                                          | 0.00022984                             | 0.003817505 |                              |             | GRINA          |
|                                   | 8                                                     | 143990058                              | 143993415   | +                            | 2527        |                |
| protein_coding                    | glutamate ionotropic receptor NMDA type subunit       |                                        |             |                              |             |                |
| associated protein 1              | [Source:HGNC Symbol;Acc:HGNC:4589]                    |                                        |             |                              |             |                |
|                                   | -                                                     |                                        |             |                              |             | 3393           |
|                                   | 4350                                                  | 3274                                   | 4499        | 4539                         | 6445        | 65.75174774    |
| 81.56624244                       | 80.60839608                                           | 98.92881224                            | 110.408447  |                              |             |                |
| 118.5901717                       |                                                       |                                        |             |                              |             |                |
| ENSG00000004700                   | 1329.122665                                           | 1057.569208                            | 1249.678524 |                              |             |                |
| 918.904055                        | 583.3023242                                           | 361.44576                              | 1212.123466 |                              |             |                |
| 621.2173797                       | 0.96530806                                            | 0.00023347                             | 0.003871528 |                              |             | RECQL          |
|                                   | 12                                                    | 21468911                               | 21501669    | -                            | 3778        |                |
| protein_coding                    | RecQ like helicase [Source:HGNC Symbol;Acc:HGNC:9948] |                                        |             |                              |             |                |
|                                   | -                                                     | 1465                                   | 1195        | 1075                         | 887         | 511            |
|                                   |                                                       |                                        |             |                              |             | 419            |
| 18.98909882                       | 14.98761031                                           | 17.70326447                            | 13.04588993 |                              |             |                |
| 8.313928912                       | 5.156833239                                           |                                        |             |                              |             |                |
| ENSG00000271334                   | 15.42326642                                           | 8.849951531                            | 27.8997996  |                              |             | 0              |
|                                   | 0                                                     | 17.39100585                            | 0           | 6.549881974                  |             |                |
| 0.00023353                        | 0.003871528                                           | LINC02104                              | 5           | 39520431                     |             |                |
|                                   | 39524708                                              | +                                      | 599         | lincRNA long intergenic non- |             |                |
| protein_coding                    | RNA 2104 [Source:HGNC Symbol;Acc:HGNC:52959]          |                                        |             |                              |             |                |
|                                   | -                                                     |                                        |             |                              |             |                |
|                                   | 17                                                    | 10                                     | 24          | 0                            | 0           | 1.38979512     |
|                                   | 0.791042138                                           | 2.492821983                            | 0           | 0                            | 0           |                |
| ENSG00000265415                   | 225.9054905                                           | 139.8292342                            | 156.9363727 |                              |             |                |
| 92.20119605                       | 26.25431205                                           | 38.81875704                            | 174.2236992 |                              |             |                |
| 52.42475504                       | 1.73265788                                            | 0.000233811                            | 0.003872557 |                              |             |                |
| AC099850.3                        | 17                                                    | 59202677                               | 59203829    | -                            |             | 321            |
|                                   | antisense                                             | "novel transcript, antisense to PRR11" |             |                              |             | -              |
|                                   | 249                                                   | 158                                    | 135         | 89                           | 23          | 45             |
|                                   | 23.32268225                                           | 26.1658943                             | 15.40625273 | 4.404231754                  |             |                |
|                                   | 6.51836236                                            |                                        |             |                              |             |                |
| ENSG00000002822                   | 2304.417454                                           | 2568.255934                            | 2429.607548 |                              |             |                |
| 2968.049738                       | 3578.576881                                           | 4603.904585                            | 2434.093645 |                              |             |                |
| 3716.843735                       | -0.610972603                                          | 0.0002353                              | 0.003893566 |                              |             | MAD1L1         |
|                                   | 7                                                     | 1815793                                | 2233243     | -                            | 7230        | protein_coding |
| mitotic arrest deficient 1 like 1 | [Source:HGNC Symbol;Acc:HGNC:6762]                    |                                        |             |                              |             |                |
|                                   | -                                                     | 2540                                   | 2902        | 2090                         | 2865        | 3135           |
|                                   |                                                       |                                        |             |                              |             | 5337           |
| 17.20378882                       | 19.01890686                                           | 17.98518193                            | 22.01903961 |                              |             |                |
| 26.65303122                       | 34.32337013                                           |                                        |             |                              |             |                |
| ENSG00000162618                   | 3.629003864                                           | 0.884995153                            | 1.16249165  |                              |             |                |
| 19.6834014                        | 29.67878753                                           | 43.13195226                            | 1.892163556 |                              |             |                |
| 30.8313804                        | -4.009757419                                          | 0.000236399                            | 0.003908089 |                              |             | ADGRL4         |
|                                   | 1                                                     | 78889764                               | 79006718    | -                            | 3677        |                |
| protein_coding                    | adhesion G protein-coupled receptor L4 [Source:HGNC   |                                        |             |                              |             |                |
| Symbol;Acc:HGNC:20822]            | -                                                     | 4                                      | 1           | 1                            | 19          | 26             |

|                                     |                                                   |                                     |                |        |
|-------------------------------------|---------------------------------------------------|-------------------------------------|----------------|--------|
| 50                                  | 0.053271515                                       | 0.012886436                         | 0.016920501    |        |
| 0.287125665                         | 0.434637384                                       | 0.632277013                         |                |        |
| ENSG00000156642                     | 1627.608233                                       | 1551.396503                         | 2157.584502    |        |
| 1268.025438                         | 1152.906746                                       | 901.4578023                         | 1778.86308     |        |
| 1107.463329                         | 0.683707506                                       | 0.000238135                         | 0.003933111    | NPTN   |
| 15                                  | 73560014                                          | 73634134                            | - 4032         |        |
| protein_coding                      | neuroplastin                                      | [Source:HGNC Symbol;Acc:HGNC:17867] |                |        |
| -                                   | 1794 1753                                         | 1856 1224                           | 1010 1045      |        |
| 21.78866385                         | 20.60097777                                       | 28.63942505                         | 16.86836299    |        |
| 15.39742901                         | 12.05110263                                       |                                     |                |        |
| ENSG00000077097                     | 4812.966375                                       | 3448.826112                         | 4218.682197    |        |
| 3279.876255                         | 2515.847989                                       | 2146.245945                         | 4160.158228    |        |
| 2647.323396                         | 0.652286407                                       | 0.000238845                         | 0.003941173    | TOP2B  |
| 3                                   | 25597905                                          | 25664907                            | - 6044         |        |
| protein_coding                      | DNA topoisomerase II beta                         | [Source:HGNC                        |                |        |
| Symbol;Acc:HGNC:11990]              | -                                                 | 5305 3897                           | 3629 3166      | 2204   |
| 2488                                | 42.98229654                                       | 30.55148967                         | 37.35677349    |        |
| 29.10707055                         | 22.41478073                                       | 19.14066131                         |                |        |
| ENSG00000178401                     | 317.5378381                                       | 294.703386                          | 263.8856045    |        |
| 165.7549592                         | 92.46083808                                       | 31.91764468                         | 292.0422762    |        |
| 96.71114731                         | 1.598743231                                       | 0.000239568                         | 0.003949411    |        |
| DNAJC22 12                          | 49346917                                          | 49357546                            | + 5109         |        |
| protein_coding                      | DnaJ heat shock protein family (Hsp40) member C22 | [Source:HGNC Symbol;Acc:HGNC:25802] |                |        |
| 160                                 | 81 37                                             | 3.354755126                         | 3.088408732    | 227    |
| 2.76437401                          | 1.740187816                                       | 0.974532835                         | 0.336741653    |        |
| ENSG00000168569                     | 777.5140778                                       | 936.324872                          | 696.3324983    |        |
| 1067.04755                          | 1462.251032                                       | 1351.755384                         | 803.3904827    |        |
| 1293.684655                         | -0.686341609                                      | 0.000241771                         | 0.003982011    |        |
| TMEM223 11                          | 62771629                                          | 62792021                            | - 2280         |        |
| protein_coding                      | transmembrane protein 223                         | [Source:HGNC                        |                |        |
| Symbol;Acc:HGNC:28464]              | -                                                 | 857 1058                            | 599 1030       | 1281   |
| 1567                                | 18.40664594                                       | 21.98757134                         | 16.34552304    |        |
| 25.10235235                         | 34.53517356                                       | 31.95693855                         |                |        |
| ENSG00000101938                     | 33.56828574                                       | 3.539980612                         | 18.5998664     | 0      |
| 0                                   | 0 18.56937758                                     | 0                                   | 6.647600468    |        |
| 0.000242042                         | 0.003982771                                       | CHRDL1 X                            | 110673856      |        |
| 110795819                           | - 3920                                            | protein_coding                      | chordin like 1 |        |
| [Source:HGNC Symbol;Acc:HGNC:29861] | -                                                 | -                                   | 37 4           | 16     |
| 0                                   | 0 0                                               | 0.462215325                         | 0.048350433    |        |
| 0.253945641                         | 0 0                                               | 0                                   |                |        |
| ENSG00000203666                     | 330.2393516                                       | 324.7932212                         | 392.9221777    |        |
| 161.6110852                         | 180.3557089                                       | 46.58250844                         | 349.3182502    |        |
| 129.5164342                         | 1.436036296                                       | 0.00024336                          | 0.003996996    | EFCAB2 |
| 1                                   | 244969705                                         | 245127164                           | + 8607         |        |
| protein_coding                      | EF-hand calcium binding domain 2                  | [Source:HGNC                        |                |        |
| Symbol;Acc:HGNC:28166]              | -                                                 | 364 367                             | 338 156        | 158    |
| 54                                  | 2.070991251                                       | 2.020415549                         | 2.443271583    |        |
| 1.007128391                         | 1.128372892                                       | 0.291724548                         |                |        |
| ENSG00000143368                     | 3863.074613                                       | 4942.69793                          | 4531.392451    |        |

|                         |                                    |              |                         |        |
|-------------------------|------------------------------------|--------------|-------------------------|--------|
| 5687.467037             | 6520.201323                        | 6875.233191  | 4445.721665             |        |
| 6360.967183             | -0.516907217                       | 0.000243382  | 0.003996996             | SF3B4  |
| 1                       | 149923317                          | 149928344    | - 2245                  |        |
| protein_coding          | splicing factor 3b subunit 4       | [Source:HGNC |                         |        |
| Symbol;Acc:HGNC:10771]  | -                                  | 4258 5585    | 3898 5490               | 5712   |
| 7970                    | 92.87909933                        | 117.8781396  | 108.0270051             |        |
| 135.8839124             | 156.3936853                        | 165.0718407  |                         |        |
| ENSG00000132153         | 4342.103123                        | 4969.247785  | 4189.619906             |        |
| 5624.272959             | 6422.033025                        | 7233.228395  | 4500.323605             |        |
| 6426.51146              | -0.513972919                       | 0.000243584  | 0.003996996             | DHX30  |
| 3                       | 47802909                           | 47850195     | + 7744                  |        |
| protein_coding          | DExH-box helicase 30               | [Source:HGNC |                         |        |
| Symbol;Acc:HGNC:16716]  | -                                  | 4786 5615    | 3604 5429               | 5626   |
| 8385                    | 30.26467632                        | 34.35665368  | 28.95518104             |        |
| 38.9552989              | 44.65619789                        | 50.34643696  |                         |        |
| ENSG00000149781         | 196.8734596                        | 229.2137447  | 184.8361723             |        |
| 351.1933198             | 352.7209749                        | 447.7096645  | 203.6411255             |        |
| 383.8746531             | -0.914336509                       | 0.000243949  | 0.003999063             | FERMT3 |
| 11                      | 64206678                           | 64223886     | + 3066                  |        |
| protein_coding          | fermitin family member 3           | [Source:HGNC |                         |        |
| Symbol;Acc:HGNC:23151]  | -                                  | 217 259      | 159 339                 | 309    |
| 519                     | 3.465901906                        | 4.002709338  | 3.226501122             |        |
| 6.143835674             | 6.194891282                        | 7.87093318   |                         |        |
| ENSG00000082497         | 658.6642013                        | 435.4176153  | 445.2343019             |        |
| 343.9415403             | 221.4494147                        | 163.0387796  | 513.1053728             |        |
| 242.8099115             | 1.081388675                        | 0.000244162  | 0.003999063             |        |
| SERTAD4 1               | 210232799                          | 210246631    | + 5467                  |        |
| protein_coding          | SERTA domain containing 4          | [Source:HGNC |                         |        |
| Symbol;Acc:HGNC:25236]  | -                                  | 726 492      | 383 332                 | 194    |
| 189                     | 6.50303708                         | 4.26424815   | 4.358695666             |        |
| 3.374434895             | 2.181222738                        | 1.607473227  |                         |        |
| ENSG00000125845         | 16.33051739                        | 20.35488852  | 15.11239145             |        |
| 48.69051926             | 78.76293614                        | 99.20349021  | 17.26593245             |        |
| 75.5523152              | -2.127289603                       | 0.000245342  | 0.004014661             | BMP2   |
| 20                      | 6767664 6780280                    | + 3601       | protein_coding bone     |        |
| morphogenetic protein 2 | [Source:HGNC Symbol;Acc:HGNC:1069] |              |                         | -      |
| 18                      | 23 13                              | 47 69        | 115 0.244781204         |        |
|                         | 0.302643364                        | 0.22460896   | 0.725248401 1.177804826 |        |
|                         | 1.484929165                        |              |                         |        |
| ENSG00000172037         | 2236.373631                        | 2165.58314   | 2598.168838             |        |
| 1630.614411             | 1648.3142                          | 966.1557307  | 2333.375203             |        |
| 1415.028114             | 0.722237406                        | 0.000248385  | 0.00406071              | LAMB2  |
| 3                       | 49121114                           | 49133118     | - 6865                  |        |
| protein_coding          | laminin subunit beta 2             | [Source:HGNC |                         |        |
| Symbol;Acc:HGNC:6487]   | -                                  | 2465 2447    | 2235 1574               | 1444   |
| 1120                    | 17.58348947                        | 16.88961962  | 20.25554032             |        |
| 12.74019954             | 12.92927021                        | 7.585924207  |                         |        |
| ENSG00000135334         | 1001.605066                        | 931.8998962  | 1067.167335             |        |
| 1230.730572             | 2255.587852                        | 1574.316258  | 1000.224099             |        |
| 1686.878227             | -0.753880817                       | 0.000250163  | 0.004085989             |        |

|                                                              |             |                                                 |             |             |       |                |
|--------------------------------------------------------------|-------------|-------------------------------------------------|-------------|-------------|-------|----------------|
| AKIRIN2                                                      | 6           | 87675072                                        | 87702209    | -           | 1999  |                |
| protein_coding                                               |             | akirin 2 [Source:HGNC Symbol;Acc:HGNC:21407]    |             |             | -     |                |
|                                                              | 1104        | 1053                                            | 918         | 1188        | 1976  | 1825           |
|                                                              | 24.95985269 | 28.57174291                                     | 33.02293656 | 60.76052341 |       |                |
|                                                              | 42.45033216 |                                                 |             |             |       |                |
| ENSG0000046774                                               |             | 33.56828574                                     | 316.8282648 | 249.9357047 |       |                |
|                                                              | 23.82727538 | 61.64055872                                     | 46.58250844 | 200.1107518 |       |                |
|                                                              | 44.01678085 | 2.185478059                                     | 0.000250511 | 0.004087909 |       | MAGEC2         |
|                                                              | X           | 142202345                                       | 142205290   | -           | 1991  |                |
| protein_coding                                               |             | MAGE family member C2 [Source:HGNC              |             |             |       |                |
| Symbol;Acc:HGNC:                                             | 13574]      | -                                               | 37          | 358         | 215   | 23             |
|                                                              | 54          | 0.910037204                                     | 8.519972783 | 6.718526686 |       | 54             |
|                                                              | 0.641901839 | 1.66713151                                      | 1.261111593 |             |       |                |
| ENSG00000189171                                              |             | 421.8716992                                     | 492.0573051 | 625.4205076 |       |                |
|                                                              | 328.4020129 | 269.3920714                                     | 188.9179509 | 513.116504  |       |                |
|                                                              | 262.2373451 | 0.96918923                                      | 0.000250891 | 0.004090331 |       |                |
| S100A13                                                      | 1           | 153618787                                       | 153631360   | -           | 2216  |                |
| protein_coding                                               |             | S100 calcium binding protein A13 [Source:HGNC   |             |             |       |                |
| Symbol;Acc:HGNC:                                             | 10490]      | -                                               | 465         | 556         | 538   | 317            |
|                                                              | 219         | 10.27571098                                     | 11.88862084 | 15.10495258 |       | 236            |
|                                                              | 7.948799634 | 6.546205085                                     | 4.595210144 |             |       |                |
| ENSG00000130589                                              |             | 542.5360777                                     | 652.2414278 | 783.519372  |       |                |
|                                                              | 904.400496  | 1283.036815                                     | 1107.628534 | 659.4322925 |       |                |
|                                                              | 1098.355282 | -0.736991457                                    | 0.000253018 | 0.004121215 |       | HELZ2          |
|                                                              | 20          | 63558086                                        | 63574239    | -           | 12066 |                |
| protein_coding                                               |             | helicase with zinc finger 2 [Source:HGNC        |             |             |       |                |
| Symbol;Acc:HGNC:                                             | 30021]      | -                                               | 598         | 737         | 674   | 873            |
|                                                              | 1284        | 2.426981951                                     | 2.894213785 | 3.475389    |       | 1124           |
|                                                              | 4.020341698 | 5.725986905                                     | 4.948034521 |             |       |                |
| ENSG00000110841                                              |             | 4014.585524                                     | 3163.857672 | 4148.932698 |       |                |
|                                                              | 2944.222463 | 2390.283888                                     | 2204.042761 | 3775.791965 |       |                |
|                                                              | 2512.849704 | 0.587423038                                     | 0.000254571 | 0.004142685 |       |                |
| PPFIBP1                                                      | 12          | 27523431                                        | 27695564    | +           | 11690 |                |
| protein_coding                                               |             | PPFIA binding protein 1 [Source:HGNC            |             |             |       |                |
| Symbol;Acc:HGNC:                                             | 9249]       | -                                               | 4425        | 3575        | 3569  | 2842           |
|                                                              | 2555        | 18.5364877                                      | 14.49065364 | 18.99498187 |       | 2094           |
|                                                              | 13.50895037 | 11.010563                                       | 10.16266036 |             |       |                |
| ENSG00000074855                                              |             | 886.3841938                                     | 935.4398768 | 1086.929693 |       |                |
|                                                              | 640.2285298 | 636.9524401                                     | 596.0835803 | 969.5845878 |       |                |
|                                                              | 624.4215168 | 0.634466378                                     | 0.000256628 | 0.004169673 |       | AN08           |
|                                                              | 19          | 17323223                                        | 17334829    | -           | 4979  |                |
| protein_coding                                               |             | anoctamin 8 [Source:HGNC Symbol;Acc:HGNC:29329] |             |             | -     |                |
|                                                              | 977         | 1057                                            | 935         | 618         | 558   | 691            |
|                                                              | 10.05910408 | 11.68359062                                     | 6.896970882 | 6.888734278 |       |                |
|                                                              | 6.453078366 |                                                 |             |             |       |                |
| ENSG00000089818                                              |             | 555.2375912                                     | 566.396898  | 570.7834001 |       |                |
|                                                              | 727.2498834 | 981.6829722                                     | 1057.59547  | 564.1392964 |       |                |
|                                                              | 922.1761084 | -0.709446603                                    | 0.0002567   | 0.004169673 |       | NECAP1         |
|                                                              | 12          | 8076939                                         | 8097859     | +           | 8763  | protein_coding |
| endocytosis associated 1 [Source:HGNC Symbol;Acc:HGNC:24539] |             |                                                 |             |             |       | NECAP          |
|                                                              |             |                                                 |             |             |       | -              |

|                                     |                                                 |     |             |             |             |             |             |        |
|-------------------------------------|-------------------------------------------------|-----|-------------|-------------|-------------|-------------|-------------|--------|
|                                     | 612                                             | 640 | 491         | 702         | 860         | 1226        | 3.420009355 |        |
|                                     | 3.460617528                                     |     | 3.486065373 |             | 4.451397157 |             | 6.032439844 |        |
|                                     | 6.50532018                                      |     |             |             |             |             |             |        |
| ENSG00000241468                     | 698.5832438                                     |     |             | 1277.933001 |             | 1319.428023 |             |        |
| 524.2000584                         | 684.8950969                                     |     |             | 605.5726098 |             | 1098.648089 |             |        |
| 604.889255                          | 0.860729647                                     |     |             | 0.000257436 |             | 0.004177783 |             | ATP5MF |
| 7                                   | 99448475                                        |     |             | 99466331    |             | -           | 2275        |        |
| protein_coding                      | ATP synthase membrane subunit f [Source:HGNC    |     |             |             |             |             |             |        |
| Symbol;Acc:HGNC:848]                | -                                               |     | 770         | 1444        |             | 1135        | 506         | 600    |
| 702                                 | 16.57440733                                     |     |             | 30.07545685 |             | 31.03997102 |             |        |
| 12.35893817                         | 16.21127637                                     |     |             | 14.34784675 |             |             |             |        |
| ENSG00000130816                     | 8001.046269                                     |     |             | 7330.414853 |             | 6933.1002   |             |        |
| 6016.905018                         | 4370.77221                                      |     |             | 5023.147161 |             | 7421.520441 |             |        |
| 5136.941463                         | 0.530802626                                     |     |             | 0.000257912 |             | 0.004181666 |             | DNMT1  |
| 19                                  | 10133345                                        |     |             | 10231286    |             | -           | 9796        |        |
| protein_coding                      | DNA methyltransferase 1 [Source:HGNC            |     |             |             |             |             |             |        |
| Symbol;Acc:HGNC:2976]               | -                                               |     | 8819        | 8283        |             | 5964        | 5808        | 3829   |
| 5823                                | 44.08585315                                     |     |             | 40.06501648 |             | 37.87875577 |             |        |
| 32.94502754                         | 24.02613705                                     |     |             | 27.63942677 |             |             |             |        |
| ENSG00000103154                     | 0.907250966                                     |     |             | 0.884995153 |             | 3.48747495  |             |        |
| 42.47470829                         | 17.12237742                                     |     |             | 29.32972754 |             | 1.759907023 |             |        |
| 29.64227108                         | -4.13590648                                     |     |             | 0.000258931 |             | 0.004193007 |             | NECAB2 |
| 16                                  | 83968632                                        |     |             | 84002776    |             | +           | 2520        |        |
| protein_coding                      | N-terminal EF-hand calcium binding protein 2    |     |             |             |             |             |             |        |
| [Source:HGNC Symbol;Acc:HGNC:23746] | -                                               |     |             | -           |             | 1           | 1           | 3      |
| 41                                  | 15                                              | 34  |             | 0.019432476 |             | 0.018802946 |             |        |
| 0.074067479                         | 0.904056056                                     |     |             | 0.365879501 |             | 0.627349266 |             |        |
| ENSG00000129810                     | 632.3539233                                     |     |             | 381.432911  |             | 387.1097194 |             |        |
| 303.538769                          | 101.5927727                                     |     |             | 172.5278091 |             | 466.9655179 |             |        |
| 192.5531169                         | 1.27765872                                      |     |             | 0.000259085 |             | 0.004193007 |             | SG01   |
| 3                                   | 20160593                                        |     |             | 20186292    |             | -           | 3828        |        |
| protein_coding                      | shugoshin 1 [Source:HGNC Symbol;Acc:HGNC:25088] |     |             |             |             |             |             |        |
| Symbol;Acc:HGNC:25088]              | -                                               |     |             | -           |             |             |             |        |
| 697                                 | 431                                             | 333 |             | 293         | 89          | 200         | 8.916399781 |        |
| 5.334967546                         | 5.412266225                                     |     |             | 4.253120965 |             | 1.429109275 |             |        |
| 2.429344383                         |                                                 |     |             |             |             |             |             |        |
| ENSG00000100243                     | 2836.06652                                      |     |             | 3370.061543 |             | 4048.958417 |             |        |
| 2107.159919                         | 2247.59741                                      |     |             | 2503.378509 |             | 3418.36216  |             |        |
| 2286.045279                         | 0.579872734                                     |     |             | 0.000262196 |             | 0.00423948  |             | CYB5R3 |
| 22                                  | 42617840                                        |     |             | 42649568    |             | -           | 5973        |        |
| protein_coding                      | cytochrome b5 reductase 3 [Source:HGNC          |     |             |             |             |             |             |        |
| Symbol;Acc:HGNC:2873]               | -                                               |     |             | 3126        | 3808        | 3483        | 2034        | 1969   |
| 2902                                | 25.62861532                                     |     |             | 30.20861858 |             | 36.2800441  |             |        |
| 18.92214985                         | 20.2628515                                      |     |             | 22.59102372 |             |             |             |        |
| ENSG00000165891                     | 2578.407245                                     |     |             | 2508.076264 |             | 2290.10855  |             |        |
| 3609.314236                         | 3250.968727                                     |     |             | 3397.935199 |             | 2458.86402  |             |        |
| 3419.406054                         | -0.475516181                                    |     |             | 0.000263276 |             | 0.004253049 |             | E2F7   |
| 12                                  | 77021247                                        |     |             | 77065580    |             | -           | 6303        |        |
| protein_coding                      | E2F transcription factor 7 [Source:HGNC         |     |             |             |             |             |             |        |
| Symbol;Acc:HGNC:23820]              | E2F                                             |     |             | 2842        | 2834        | 1970        | 3484        | 2848   |
| 3939                                | 22.08032442                                     |     |             | 21.30487447 |             | 19.4457978  |             |        |

|                                     |                                                        |             |             |       |  |  |
|-------------------------------------|--------------------------------------------------------|-------------|-------------|-------|--|--|
| 30.7144599                          | 27.77410276                                            | 29.05826579 |             |       |  |  |
| ENSG00000189159                     | 2556.633222                                            | 2954.113821 | 3084.090347 |       |  |  |
| 1852.311669                         | 2229.33354                                             | 1827.069498 | 2864.945797 |       |  |  |
| 1969.571569                         | 0.540831199                                            | 0.000264786 | 0.004273539 | JPT1  |  |  |
| 17                                  | 75135248                                               | 75168281    | - 3414      |       |  |  |
| protein_coding                      | Jupiter microtubule associated homolog 1 [Source:HGNC  |             |             |       |  |  |
| Symbol;Acc:HGNC:14569]              | -                                                      | 2818 3338   | 2653 1788   | 1953  |  |  |
| 2118                                | 40.42091642                                            | 46.32860852 | 48.34823004 |       |  |  |
| 29.10154467                         | 35.16301344                                            | 28.84652193 |             |       |  |  |
| ENSG00000123992                     | 922.6742324                                            | 1172.618578 | 1069.492318 |       |  |  |
| 1276.313186                         | 1806.981564                                            | 2086.723851 | 1054.928376 |       |  |  |
| 1723.339533                         | -0.70840469                                            | 0.00026504  | 0.004273744 | DNPEP |  |  |
| 2                                   | 219373527                                              | 219400022   | - 4753      |       |  |  |
| protein_coding                      | aspartyl aminopeptidase [Source:HGNC                   |             |             |       |  |  |
| Symbol;Acc:HGNC:2981]               | -                                                      | 1017 1325   | 920 1232    | 1583  |  |  |
| 2419                                | 10.47808271                                            | 13.20913883 | 12.04278297 |       |  |  |
| 14.40306555                         | 20.47200886                                            | 23.66459478 |             |       |  |  |
| ENSG00000132467                     | 1115.918688                                            | 1303.597861 | 976.4929859 |       |  |  |
| 1573.636144                         | 1596.947068                                            | 2321.361671 | 1132.003178 |       |  |  |
| 1830.648294                         | -0.693464249                                           | 0.000266201 | 0.004288545 | UTP3  |  |  |
| 4                                   | 70688479                                               | 70690551    | + 2073      |       |  |  |
| protein_coding                      | "UTP3, small subunit processome component [Source:HGNC |             |             |       |  |  |
| Symbol;Acc:HGNC:24477]"             | -                                                      | 1230 1473   | 840 1519    | 1399  |  |  |
| 2691                                | 29.05591075                                            | 33.66897426 | 25.21081181 |       |  |  |
| 40.71650718                         | 41.48258126                                            | 60.35946946 |             |       |  |  |
| ENSG00000204356                     | 1758.252372                                            | 2165.58314  | 2115.734803 |       |  |  |
| 2606.496733                         | 2958.746819                                            | 3278.891011 | 2013.190105 |       |  |  |
| 2948.044854                         | -0.550628756                                           | 0.000266625 | 0.004291469 | NELFE |  |  |
| 6                                   | 31952087                                               | 31959110    | - 2719      |       |  |  |
| protein_coding                      | negative elongation factor complex member E            |             |             |       |  |  |
| [Source:HGNC Symbol;Acc:HGNC:13974] | -                                                      | 1938 2447   | 1820        |       |  |  |
| 2516                                | 2592 3801                                              | 34.90384318 | 42.64333897 |       |  |  |
| 41.64559075                         | 51.41779789                                            | 58.59669883 | 65.00094643 |       |  |  |
| ENSG00000213694                     | 485.3792668                                            | 265.4985459 | 596.3582164 |       |  |  |
| 282.8193991                         | 114.1491828                                            | 150.0991939 | 449.0786764 |       |  |  |
| 182.3559253                         | 1.29887195                                             | 0.000267187 | 0.004296608 | S1PR3 |  |  |
| 9                                   | 88990863                                               | 89005010    | + 13578     |       |  |  |
| protein_coding                      | sphingosine-1-phosphate receptor 3 [Source:HGNC        |             |             |       |  |  |
| Symbol;Acc:HGNC:3167]               | -                                                      | 535 300     | 513 273     | 100   |  |  |
| 174                                 | 1.929508345                                            | 1.04691613  | 2.350652369 |       |  |  |
| 1.117220475                         | 0.452701106                                            | 0.595860315 |             |       |  |  |
| ENSG00000112992                     | 1408.96075                                             | 973.4946684 | 1183.4165   |       |  |  |
| 759.3649068                         | 816.1666571                                            | 546.9131547 | 1188.623973 |       |  |  |
| 707.4815729                         | 0.749716125                                            | 0.000271753 | 0.004366069 | NNT   |  |  |
| 5                                   | 43602692                                               | 43707405    | + 8245      |       |  |  |
| protein_coding                      | nicotinamide nucleotide transhydrogenase [Source:HGNC  |             |             |       |  |  |
| Symbol;Acc:HGNC:7863]               | -                                                      | 1553 1100   | 1018 733    | 715   |  |  |
| 634                                 | 9.223791541                                            | 6.32162116  | 7.681817135 |       |  |  |
| 4.939981907                         | 5.330436106                                            | 3.575441001 |             |       |  |  |
| ENSG00000234323                     | 14.51601546                                            | 23.89486913 | 11.6249165  | 0     |  |  |



|                                     |                                                        |                                     |              |                      |             |             |
|-------------------------------------|--------------------------------------------------------|-------------------------------------|--------------|----------------------|-------------|-------------|
| 0                                   | 0                                                      | 16.67860036                         | 0            | 6.494904691          |             |             |
| 0.000272688                         | 0.004377113                                            | LINC01505                           | 9            | 105993310            |             |             |
| 106740875                           | +                                                      | 10944                               | lincRNA      | long intergenic non- |             |             |
| protein coding RNA                  | 1505                                                   | [Source:HGNC Symbol;Acc:HGNC:51186] | -            |                      |             |             |
| 16                                  | 27                                                     | 10                                  | 0            | 0                    | 0           | 0.071593333 |
| 0.116899895                         | 0.056850038                                            | 0                                   | 0            | 0                    | 0           |             |
| ENSG00000144749                     | 1342.73143                                             | 1362.892536                         | 2348.233133  |                      |             |             |
| 959.3068263                         | 1090.124696                                            | 892.8314119                         | 1684.619033  |                      |             |             |
| 980.7543113                         | 0.779951009                                            | 0.000272942                         | 0.004377212  |                      |             | LRIG1       |
| 3                                   | 66378797                                               | 66501263                            | -            | 7032                 |             |             |
| protein_coding                      | leucine rich repeats and immunoglobulin like domains 1 |                                     |              |                      |             |             |
| [Source:HGNC Symbol;Acc:HGNC:17360] | -                                                      | 1480                                | 1540         | 2020                 |             |             |
| 926                                 | 955                                                    | 1035                                | 10.30650781  | 10.37691596          |             |             |
| 17.87225507                         | 7.317187238                                            | 8.347796813                         | 6.843724304  |                      |             |             |
| ENSG00000107551                     | 220.4619847                                            | 219.478798                          | 576.5958583  |                      |             |             |
| 155.3952742                         | 120.9981338                                            | 117.3189102                         | 338.845547   |                      |             |             |
| 131.2374394                         | 1.366139539                                            | 0.000273894                         | 0.004388502  |                      |             | RASSF4      |
| 10                                  | 44959407                                               | 44995891                            | +            | 9481                 |             |             |
| protein_coding                      | Ras association domain family member 4                 |                                     |              |                      |             |             |
| [Source:HGNC Symbol;Acc:HGNC:20793] | -                                                      | 243                                 | 248          | 496                  | 150         | 106         |
| 136                                 | 1.25510717                                             | 1.239435626                         | 3.254875464  |                      |             |             |
| 0.879122016                         | 0.687225204                                            | 0.666984559                         |              |                      |             |             |
| ENSG00000259974                     | 0                                                      | 0                                   | 0            | 7.251779464          | 13.69790194 |             |
| 30.19236658                         | 0                                                      | 17.04734933                         | -6.570455713 |                      |             |             |
| 0.00027442                          | 0.004392959                                            | LINC00261                           | 20           | 22547671             |             |             |
| 22578642                            | -                                                      | 5552                                | lincRNA      | long intergenic non- |             |             |
| protein coding RNA                  | 261                                                    | [Source:HGNC Symbol;Acc:HGNC:16189] | -            |                      |             |             |
| 0                                   | 0                                                      | 0                                   | 7            | 12                   | 35          | 0           |
| 0                                   | 0.070058466                                            | 0.132855381                         | 0.293122803  |                      |             |             |
| ENSG00000159111                     | 1314.60665                                             | 1463.781983                         | 1596.101035  |                      |             |             |
| 1767.362252                         | 2487.310694                                            | 2467.147669                         | 1458.163223  |                      |             |             |
| 2240.606872                         | -0.620174502                                           | 0.000276747                         | 0.004426195  |                      |             | MRPL10      |
| 17                                  | 47823272                                               | 47831534                            | -            | 2764                 |             |             |
| protein_coding                      | mitochondrial ribosomal protein L10                    |                                     |              |                      |             |             |
| [Source:HGNC Symbol;Acc:HGNC:14055] | -                                                      | 1449                                | 1654         | 1373                 | 1706        | 2179        |
| 2860                                | 25.67196017                                            | 28.35462496                         | 30.90575412  |                      |             |             |
| 34.29675506                         | 48.45811896                                            | 48.11262058                         |              |                      |             |             |
| ENSG00000145247                     | 880.940688                                             | 1302.712865                         | 991.6053774  |                      |             |             |
| 1282.528997                         | 2066.100209                                            | 2034.102869                         | 1058.419644  |                      |             |             |
| 1794.244025                         | -0.761223379                                           | 0.000278573                         | 0.004451375  |                      |             | OCIAD2      |
| 4                                   | 48885019                                               | 48906937                            | -            | 2483                 |             |             |
| protein_coding                      | OCIA domain containing 2                               |                                     |              |                      |             |             |
| [Source:HGNC Symbol;Acc:HGNC:28685] | -                                                      | 971                                 | 1472         | 853                  | 1238        | 1810        |
| 2358                                | 19.15010651                                            | 28.09037463                         | 21.37367288  |                      |             |             |
| 27.70486057                         | 44.80734545                                            | 44.15685148                         |              |                      |             |             |
| ENSG00000168476                     | 1084.164904                                            | 1117.748878                         | 1229.916166  |                      |             |             |
| 730.3577889                         | 654.0748175                                            | 840.2104301                         | 1143.943316  |                      |             |             |
| 741.5476788                         | 0.623939407                                            | 0.000279525                         | 0.004462561  |                      |             | REEP4       |
| 8                                   | 22138020                                               | 22141951                            | -            | 2266                 |             |             |
| protein_coding                      | receptor accessory protein 4                           |                                     |              |                      |             |             |
| [Source:HGNC                        |                                                        |                                     |              |                      |             |             |

|                           |                                               |             |             |                |      |             |
|---------------------------|-----------------------------------------------|-------------|-------------|----------------|------|-------------|
| Symbol;Acc:HGNC:26176]    | -                                             | 1195        | 1263        | 1058           | 705  | 573         |
| 974                       | 25.82478314                                   | 26.41009028 |             | 29.04909513    |      |             |
| 17.28786072               | 15.54325874                                   | 19.98619266 |             |                |      |             |
| ENSG00000137055           | 1336.380673                                   | 1239.87821  |             | 1095.067134    |      |             |
| 1877.174913               | 1986.195781                                   | 1605.371263 |             | 1223.775339    |      |             |
| 1822.913986               | -0.573876922                                  | 0.000282075 |             | 0.004499216    |      | PLAA        |
| 9                         | 26904083                                      | 26947463    |             | -              | 4825 |             |
| protein_coding            | phospholipase A2 activating protein           |             |             |                |      |             |
| [Source:HGNC              |                                               |             |             |                |      |             |
| Symbol;Acc:HGNC:9043]     | -                                             | 1473        | 1401        | 942            | 1812 | 1740        |
| 1861                      | 14.94975628                                   | 13.75837867 |             | 12.14675947    |      |             |
| 20.86761999               | 22.16661053                                   | 17.93412009 |             |                |      |             |
| ENSG00000261499           | 41.73354444                                   | 35.39980612 |             | 33.71225785    |      |             |
| 6.215810969               | 2.282983656                                   | 0           | 36.94853614 | 2.832931542    |      |             |
| 3.7361436                 | 0.00028408                                    |             | 0.004527103 | AC233699.1     |      |             |
| 17                        | 36274191                                      | 36320547    |             | +              | 1168 |             |
| unprocessed_pseudogene    | aminopeptidase puromycin sensitive (NPEPPS)   |             |             |                |      |             |
| pseudogene                | -                                             | 46          | 40          | 29             | 6    | 2           |
|                           |                                               |             |             |                |      | 0           |
| 1.928606706               | 1.622720002                                   |             | 1.544763509 | 0.285443693    |      |             |
| 0.105253007               | 0                                             |             |             |                |      |             |
| ENSG00000059122           | 588.8058769                                   | 664.63136   |             | 717.257348     |      |             |
| 829.8107644               | 1246.509076                                   | 1159.386877 |             | 656.898195     |      |             |
| 1078.568906               | -0.715919491                                  | 0.000286786 |             | 0.004566121    |      |             |
| FLYWCH1 16                | 2911937 2951208 +                             | 8419        |             | protein_coding |      |             |
| FLYWCH-type zinc finger 1 | [Source:HGNC                                  |             |             |                |      |             |
| Symbol;Acc:HGNC:25404]    | -                                             |             |             |                |      |             |
| 649                       | 751                                           | 617         | 801         | 1092           | 1344 | 3.774964491 |
| 4.226743255               | 4.559649934                                   |             | 5.286692497 | 7.972774652    |      |             |
| 7.422834495               |                                               |             |             |                |      |             |
| ENSG00000112667           | 391.9324173                                   | 686.7562388 |             | 717.257348     |      |             |
| 235.1648483               | 352.7209749                                   | 325.2149201 |             | 598.648668     |      |             |
| 304.3669144               | 0.97529761                                    | 0.000287413 |             | 0.004571984    |      | DNPH1       |
| 6                         | 43225629                                      | 43229484    |             | -              | 1250 |             |
| protein_coding            | 2'-deoxynucleoside 5'-phosphate N-hydrolase 1 |             |             |                |      |             |
| [Source:HGNC              |                                               |             |             |                |      |             |
| Symbol;Acc:HGNC:21218]    | -                                             |             |             | 432            | 776  | 617         |
| 227                       | 309                                           | 377         | 16.92397665 | 29.41562965    |      |             |
| 30.71015424               | 10.09085319                                   | 15.19482934 |             | 14.02369169    |      |             |
| ENSG00000181467           | 1992.323121                                   | 1762.910345 |             | 1675.150467    |      |             |
| 1252.48591                | 1243.084601                                   | 1267.216758 |             | 1810.127978    |      |             |
| 1254.262423               | 0.529505005                                   | 0.000288299 |             | 0.004581959    |      | RAP2B       |
| 3                         | 153162270                                     | 153170620   |             | +              | 8351 |             |
| protein_coding            | "RAP2B, member of RAS oncogene family         |             |             |                |      |             |
| [Source:HGNC              |                                               |             |             |                |      |             |
| Symbol;Acc:HGNC:9862]"    | -                                             | 2196        | 1992        | 1441           | 1209 | 1089        |
| 1469                      | 12.87723246                                   | 11.30257223 |             | 10.73574886    |      |             |
| 8.044514908               | 8.015613283                                   | 8.179265963 |             |                |      |             |
| ENSG00000103042           | 465.4197455                                   | 451.3475281 |             | 418.496994     |      |             |
| 692.0269546               | 719.1398517                                   | 703.9134609 |             | 445.0880892    |      |             |
| 705.0267558               | -0.662838839                                  | 0.000289179 |             | 0.004591823    |      |             |
| SLC38A7 16                | 58665109                                      | 58685104    |             | -              | 6991 |             |
| protein_coding            | solute carrier family 38 member 7             |             |             |                |      |             |
| [Source:HGNC              |                                               |             |             |                |      |             |
| Symbol;Acc:HGNC:25582]    | -                                             | 513         | 510         | 360            | 668  | 630         |
| 816                       | 3.593409789                                   | 3.456665179 |             | 3.20383429     |      |             |

|                                     |                                                        |             |             |             |      |             |
|-------------------------------------|--------------------------------------------------------|-------------|-------------|-------------|------|-------------|
| 5.309445949                         | 5.539219914                                            | 5.427275586 |             |             |      |             |
| ENSG0000049860                      | 3034.754481                                            | 2592.150803 | 2793.467435 |             |      |             |
| 2207.648863                         | 1876.612566                                            | 1585.530565 | 2806.790906 |             |      |             |
| 1889.930664                         | 0.570969236                                            | 0.000291615 | 0.004625164 | HEXB        |      |             |
| 5                                   | 74640023                                               | 74722647    | +           | 5067        |      |             |
| protein_coding                      | hexosaminidase subunit beta [Source:HGNC               |             |             |             |      |             |
| Symbol;Acc:HGNC:4879]               | -                                                      | 3345        | 2929        | 2403        | 2131 | 1644        |
| 1838                                | 32.32763257                                            | 27.39018138 | 29.50595754 |             |      |             |
| 23.36924002                         | 19.94335726                                            | 16.86652525 |             |             |      |             |
| ENSG00000256663                     | 281.2477995                                            | 298.2433666 | 280.1604876 |             |      |             |
| 171.9707702                         | 136.9790194                                            | 107.8298807 | 286.5505512 |             |      |             |
| 138.9265567                         | 1.046773987                                            | 0.000291802 | 0.004625164 |             |      |             |
| AC112777.1                          | 12                                                     | 20551590    | 20553012    | +           |      | 1423        |
| processed_pseudogene                | ubiquitin-like with PHD and ring                       |             |             |             |      |             |
| finger domains 1 (UHRF1) pseudogene | -                                                      | 310         | 337         |             |      | 241         |
| 166                                 | 120                                                    | 125         | 10.66806068 | 11.22151364 |      |             |
| 10.53704874                         | 6.482092611                                            | 5.183507201 | 4.084473955 |             |      |             |
| ENSG00000137404                     | 984.3672981                                            | 901.810061  | 995.0928523 |             |      |             |
| 710.6743875                         | 541.0671266                                            | 573.6549651 | 960.4234038 |             |      |             |
| 608.4654931                         | 0.658218771                                            | 0.000292243 | 0.004628009 | NRM         |      |             |
| 6                                   | 30688047                                               | 30691420    | -           | 2045        |      |             |
| protein_coding                      | nurim [Source:HGNC Symbol;Acc:HGNC:8003]               |             |             |             |      | -           |
| 1085                                | 1019                                                   | 856         | 686         | 474         | 665  | 25.98155316 |
| 23.6106157                          | 26.04277741                                            | 18.63986862 | 14.24729411 |             |      |             |
| 15.1202632                          |                                                        |             |             |             |      |             |
| ENSG00000187123                     | 477.2140081                                            | 374.3529498 | 416.1720107 |             |      |             |
| 277.6395566                         | 208.8930046                                            | 182.8794776 | 422.5796562 |             |      |             |
| 223.1373463                         | 0.922450054                                            | 0.000293126 | 0.00463784  | LYPD6       |      |             |
| 2                                   | 149329985                                              | 149474148   | +           | 5033        |      |             |
| protein_coding                      | LY6/PLAUR domain containing 6 [Source:HGNC             |             |             |             |      |             |
| Symbol;Acc:HGNC:28751]              | -                                                      | 526         | 423         | 358         | 268  | 183         |
| 212                                 | 5.117849345                                            | 3.982354138 | 4.425506091 |             |      |             |
| 2.958829277                         | 2.234969082                                            | 1.958573836 |             |             |      |             |
| ENSG00000138668                     | 5900.760283                                            | 7031.286492 | 7249.297929 |             |      |             |
| 4825.541249                         | 4894.716959                                            | 4897.20186  | 6727.114901 |             |      |             |
| 4872.486689                         | 0.465213069                                            | 0.000293513 | 0.004639808 | HNRNPD      |      |             |
| 4                                   | 82352498                                               | 82374503    | -           | 6981        |      |             |
| protein_coding                      | heterogeneous nuclear ribonucleoprotein D [Source:HGNC |             |             |             |      |             |
| Symbol;Acc:HGNC:5036]               | -                                                      | 6504        | 7945        | 6236        | 4658 | 4288        |
| 5677                                | 45.62381296                                            | 53.92655839 | 55.5770275  |             |      |             |
| 37.07608677                         | 37.75587146                                            | 37.81222856 |             |             |      |             |
| ENSG00000105011                     | 1909.763283                                            | 1987.699114 | 2229.658984 |             |      |             |
| 1571.564207                         | 1338.969914                                            | 1012.738239 | 2042.373794 |             |      |             |
| 1307.757453                         | 0.643573048                                            | 0.000294543 | 0.004651942 | ASF1B       |      |             |
| 19                                  | 14119509                                               | 14136956    | -           | 2304        |      |             |
| protein_coding                      | anti-silencing function 1B histone chaperone           |             |             |             |      |             |
| [Source:HGNC Symbol;Acc:HGNC:20996] | -                                                      | 2105        | 2246        |             |      | 1918        |
| 1517                                | 1173                                                   | 1174        | 44.74023995 | 46.19061217 |      |             |
| 51.79322747                         | 36.5860185                                             | 31.2941311  | 23.69281374 |             |      |             |
| ENSG00000120742                     | 4137.064405                                            | 4933.847979 | 4060.583333 |             |      |             |

|                                     |                                                    |             |                |             |
|-------------------------------------|----------------------------------------------------|-------------|----------------|-------------|
| 5706.11447                          | 6101.273822                                        | 6556.056744 | 4377.165239    |             |
| 6121.148345                         | -0.483702128                                       | 0.00029665  | 0.004681042    | SERP1       |
| 3                                   | 150541994                                          | 150603228   | - 5747         |             |
| protein_coding                      | stress associated endoplasmic reticulum protein 1  |             |                |             |
| [Source:HGNC Symbol;Acc:HGNC:10759] | -                                                  | 4560        | 5575           | 3493        |
| 5508                                | 5345 7600                                          | 38.85548454 | 45.96530174    |             |
| 37.81501135                         | 53.25553821                                        | 57.16811502 | 61.48984712    |             |
| ENSG00000134775                     | 735.7805334                                        | 715.9610789 | 892.7935871    |             |
| 517.9842475                         | 458.8797149                                        | 236.3630984 | 781.5117331    |             |
| 404.4090203                         | 0.95201766                                         | 0.000297105 | 0.004684032    | FHOD3       |
| 18                                  | 36297714                                           | 36780055    | + 7965         |             |
| protein_coding                      | formin homology 2 domain containing 3 [Source:HGNC |             |                |             |
| Symbol;Acc:HGNC:26178]              | -                                                  | 811 809     | 768 500        | 402         |
| 274                                 | 4.98613184                                         | 4.812704339 | 5.999047304    |             |
| 3.488158958                         | 3.102327433                                        | 1.599542563 |                |             |
| ENSG00000116584                     | 3521.94825                                         | 3666.534919 | 4765.053273    |             |
| 4700.189061                         | 6725.669852                                        | 7065.013781 | 3984.512147    |             |
| 6163.624231                         | -0.629717649                                       | 0.000298292 | 0.004698566    |             |
| ARHGEF2 1                           | 155946851                                          | 156007070   | - 9135         |             |
| protein_coding                      | Rho/Rac guanine nucleotide exchange factor 2       |             |                |             |
| [Source:HGNC Symbol;Acc:HGNC:682]   | -                                                  | 3882        | 4143           | 4099        |
| 4537                                | 5892 8190                                          | 20.81017167 | 21.48982221    |             |
| 27.91747997                         | 27.59766072                                        | 39.6461981  | 41.68754962    |             |
| ENSG00000143167                     | 39.01179154                                        | 23.89486913 | 22.08734135    |             |
| 3.107905485                         | 0 0                                                | 28.33133401 | 1.035968495    |             |
| 4.798701157                         | 0.000300688                                        | 0.004732092 | GPA33 1        |             |
| 167052836                           | 167166479                                          | - 3200      | protein_coding |             |
| glycoprotein A33                    | [Source:HGNC Symbol;Acc:HGNC:4445]                 |             |                | 43          |
| 27                                  | 19 3                                               | 0 0         | 0.658032223    |             |
| 0.39979764                          | 0.369411549                                        | 0.052093474 | 0 0            |             |
| ENSG00000121058                     | 694.046989                                         | 657.5513988 | 613.7955911    |             |
| 951.0190783                         | 1033.050104                                        | 994.6228192 | 655.1313263    |             |
| 992.897334                          | -0.599175528                                       | 0.000301771 | 0.004744918    | COIL        |
| 17                                  | 56938187                                           | 56961054    | - 3030         |             |
| protein_coding                      | coilin [Source:HGNC Symbol;Acc:HGNC:2184]          |             |                | -           |
| 765                                 | 743 528                                            | 918 905     | 1153           | 12.36367243 |
| 11.61910365                         | 10.84171884                                        | 16.83496029 | 18.35918131    |             |
| 17.69366079                         |                                                    |             |                |             |
| ENSG00000086062                     | 1944.23882                                         | 1742.555456 | 2270.346192    |             |
| 1467.967357                         | 1336.686931                                        | 1111.941729 | 1985.71349     |             |
| 1305.532006                         | 0.605058907                                        | 0.000302822 | 0.00475528     |             |
| B4GALT1 9                           | 33104082                                           | 33167356    | - 4901         |             |
| protein_coding                      | "beta-1,4-galactosyltransferase 1 [Source:HGNC     |             |                |             |
| Symbol;Acc:HGNC:924]"               | -                                                  | 2143 1969   | 1953 1417      | 1171        |
| 1289                                | 21.41243966                                        | 19.0365154  | 24.79273209    |             |
| 16.06560894                         | 14.68654204                                        | 12.22923338 |                |             |
| ENSG00000145730                     | 1801.800418                                        | 1753.175398 | 2925.991483    |             |
| 1297.032556                         | 1501.061754                                        | 1016.188795 | 2160.322433    |             |
| 1271.427702                         | 0.764769681                                        | 0.000302968 | 0.00475528     | PAM         |
| 5                                   | 102753981                                          | 103031105   | + 8846         |             |

|                                                                       |                                               |         |             |             |       |                |      |  |
|-----------------------------------------------------------------------|-----------------------------------------------|---------|-------------|-------------|-------|----------------|------|--|
| protein_coding                                                        | peptidylglycine alpha-amidating monooxygenase |         |             |             |       |                |      |  |
| [Source:HGNC Symbol;Acc:HGNC:8596]                                    |                                               | -       |             | 1986        | 1981  | 2517           |      |  |
| 1252                                                                  | 1315                                          | 1178    | 10.99413316 | 10.61118732 |       |                |      |  |
| 17.70284746                                                           | 7.86446959                                    |         | 9.1374745   | 6.191977557 |       |                |      |  |
| ENSG00000159055                                                       | 554.3303402                                   |         | 512.4121937 | 526.6087174 |       |                |      |  |
| 378.1285006                                                           | 253.4111859                                   |         | 255.3411574 | 531.1170838 |       |                |      |  |
| 295.626948                                                            | 0.845647185                                   |         | 0.000303626 | 0.004761385 |       | MIS18A         |      |  |
| 21                                                                    | 32268219                                      |         | 32279069    | -           | 1723  |                |      |  |
| protein_coding                                                        | MIS18 kinetochore protein A                   |         |             |             |       |                |      |  |
| [Source:HGNC Symbol;Acc:HGNC:1286]                                    |                                               | -       | 611         | 579         | 453   | 365            | 222  |  |
| 296                                                                   | 17.365393                                     |         | 15.92281052 | 16.35760705 |       |                |      |  |
| 11.77116997                                                           | 7.919815369                                   |         | 7.987988882 |             |       |                |      |  |
| ENSG00000140632                                                       | 1130.434704                                   |         | 1106.243941 | 1160.166667 |       |                |      |  |
| 787.3360561                                                           | 801.3272634                                   |         | 645.2540059 | 1132.281771 |       |                |      |  |
| 744.6391085                                                           | 0.605461567                                   |         | 0.000305995 | 0.004793412 |       | GLYR1          |      |  |
| 16                                                                    | 4803203                                       | 4847342 | -           | 5470        |       | protein_coding |      |  |
| glyoxylate reductase 1 homolog                                        |                                               |         |             |             |       |                |      |  |
| [Source:HGNC Symbol;Acc:HGNC:24434]                                   |                                               |         |             |             |       |                |      |  |
| -                                                                     | 1246                                          | 1250    | 998         | 760         | 702   | 748            |      |  |
| 11.15473865                                                           | 10.82802195                                   |         | 11.35141657 | 7.720373469 |       |                |      |  |
| 7.888549336                                                           | 6.358362582                                   |         |             |             |       |                |      |  |
| ENSG00000112096                                                       | 2026.798658                                   |         | 2770.034829 | 3377.038243 |       |                |      |  |
| 3309.919341                                                           | 4681.257987                                   |         | 5648.560468 | 2724.62391  |       |                |      |  |
| 4546.579266                                                           | -0.739214854                                  |         | 0.00030621  | 0.004793412 |       | SOD2           |      |  |
| 6                                                                     | 159669057                                     |         | 159745186   | -           | 16493 |                |      |  |
| protein_coding                                                        | superoxide dismutase 2                        |         |             |             |       |                |      |  |
| [Source:HGNC Symbol;Acc:HGNC:11180]                                   |                                               | -       | 2234        | 3130        | 2905  | 3195           | 4101 |  |
| 6548                                                                  | 6.633033541                                   |         | 8.992306875 | 10.95855583 |       |                |      |  |
| 10.7642369                                                            | 15.28401554                                   |         | 18.46035421 |             |       |                |      |  |
| ENSG00000198786                                                       | 29527.38994                                   |         | 34543.13082 | 20674.91399 |       |                |      |  |
| 40897.96424                                                           | 40473.87575                                   |         | 47214.82287 | 28248.47825 |       |                |      |  |
| 42862.22095                                                           | -0.601484467                                  |         | 0.000309149 | 0.004835136 |       | MT-ND5         |      |  |
| MT                                                                    | 12337                                         | 14148   | +           | 1812        |       | protein_coding |      |  |
| mitochondrially encoded NADH:ubiquinone oxidoreductase core subunit 5 |                                               |         |             |             |       |                |      |  |
| [Source:HGNC Symbol;Acc:HGNC:7461]                                    |                                               |         |             |             |       |                |      |  |
| 39478                                                                 | 35457                                         | 54733   | 879.5653461 | 1020.678702 |       |                |      |  |
| 610.6642878                                                           | 1210.623202                                   |         | 1202.793726 | 1404.501081 |       |                |      |  |
| ENSG00000186432                                                       | 3962.872219                                   |         | 3589.540341 | 3288.688878 |       |                |      |  |
| 5499.956739                                                           | 4898.141435                                   |         | 4749.690583 | 3613.700479 |       |                |      |  |
| 5049.262919                                                           | -0.48230877                                   |         | 0.000310856 | 0.004857538 |       | KPNA4          |      |  |
| 3                                                                     | 160494995                                     |         | 160565588   | -           | 9413  |                |      |  |
| protein_coding                                                        | karyopherin subunit alpha 4                   |         |             |             |       |                |      |  |
| [Source:HGNC Symbol;Acc:HGNC:6397]                                    |                                               | -       | 4368        | 4056        | 2829  | 5309           | 4291 |  |
| 5506                                                                  | 22.72392015                                   |         | 20.41720684 | 18.69871384 |       |                |      |  |
| 31.33983534                                                           | 28.02062487                                   |         | 27.19813759 |             |       |                |      |  |
| ENSG00000135074                                                       | 2336.171237                                   |         | 2111.598435 | 2723.717936 |       |                |      |  |
| 1509.406097                                                           | 1599.230051                                   |         | 1780.486989 | 2390.495869 |       |                |      |  |
| 1629.707713                                                           | 0.551926228                                   |         | 0.000312453 | 0.004878187 |       | ADAM19         |      |  |
| 5                                                                     | 157395534                                     |         | 157575775   | -           | 7704  |                |      |  |
| protein_coding                                                        | ADAM metalloproteinase domain 19              |         |             |             |       |                |      |  |
| [Source:HGNC Symbol;Acc:HGNC:197]                                     |                                               | -       | 2575        | 2386        | 2343  | 1457           | 1401 |  |

|                                     |                                                  |             |             |             |
|-------------------------------------|--------------------------------------------------|-------------|-------------|-------------|
| 2064                                | 16.36777487                                      | 14.67508435 | 18.92181801 |             |
| 10.5088531                          | 11.17813168                                      | 12.45731473 |             |             |
| ENSG00000092203                     | 1081.443151                                      | 1088.544038 | 1354.302772 |             |
| 1643.046033                         | 1743.058022                                      | 1826.206859 | 1174.763321 |             |
| 1737.436971                         | -0.56565047                                      | 0.000317196 | 0.004947866 | TOX4        |
| 14                                  | 21476597                                         | 21499175    | + 7091      |             |
| protein_coding                      | TOX high mobility group box family member 4      |             |             |             |
| [Source:HGNC Symbol;Acc:HGNC:20161] | HMG                                              | 1192        | 1230        | 1165        |
| 1586                                | 1527 2117                                        | 8.231850103 | 8.219096261 |             |
| 10.22175075                         | 12.42818591                                      | 13.23667519 | 13.8817555  |             |
| ENSG00000248774                     | 18.14501932                                      | 15.0449176  | 15.11239145 | 0           |
| 0                                   | 0                                                | 16.10077612 | 0           | 6.442467413 |
| 0.000318687                         | 0.004966749                                      | AC097534.1  | 4           | 173322206   |
| 173329694                           | -                                                | 521         | antisense   | novel       |
| transcript                          | -                                                | 20          | 17          | 13          |
| 1.879840301                         | 1.546100209                                      | 1.552431605 | 0           | 0           |
| 0                                   |                                                  |             |             |             |
| ENSG00000197557                     | 185.0791971                                      | 222.1337834 | 240.6357715 |             |
| 392.6320596                         | 408.6540745                                      | 373.5227066 | 215.949584  |             |
| 391.6029469                         | -0.859803364                                     | 0.000322314 | 0.005018848 | TTC30A      |
| 2                                   | 177612992                                        | 177618966   | - 5975      |             |
| protein_coding                      | tetratricopeptide repeat domain 30A [Source:HGNC |             |             |             |
| Symbol;Acc:HGNC:25853]              | -                                                | 204 251     | 207 379     | 358         |
| 433                                 | 1.671940975                                      | 1.990500324 | 2.155456598 |             |
| 3.524628463                         | 3.682921628                                      | 3.369620602 |             |             |
| ENSG00000111328                     | 534.370819                                       | 359.3080322 | 517.3087842 |             |
| 257.9561552                         | 277.3825142                                      | 233.7751813 | 470.3292118 |             |
| 256.3712836                         | 0.875716566                                      | 0.000324601 | 0.005050017 |             |
| CDK2AP1 12                          | 123260971                                        | 123272334   | - 3117      |             |
| protein_coding                      | cyclin dependent kinase 2 associated protein 1   |             |             |             |
| [Source:HGNC Symbol;Acc:HGNC:14002] | -                                                | 589         | 406         | 445         |
| 249                                 | 243 271                                          | 9.253524434 | 6.171854401 |             |
| 8.882394447                         | 4.438892101                                      | 4.792000244 | 4.042625459 |             |
| ENSG00000174080                     | 223.1837376                                      | 268.1535314 | 212.7359719 |             |
| 109.8126605                         | 107.3002318                                      | 118.1815492 | 234.6910803 |             |
| 111.7648138                         | 1.070269508                                      | 0.000326031 | 0.005067808 | CTSF        |
| 11                                  | 66563463                                         | 66568841    | - 2896      |             |
| protein_coding                      | cathepsin F [Source:HGNC Symbol;Acc:HGNC:2531]   |             |             | -           |
| 246                                 | 303 183                                          | 106 94      | 137         | 4.15973087  |
| 4.957588912                         | 3.931509947                                      | 2.033852021 | 1.995155071 |             |
| 2.199647188                         |                                                  |             |             |             |
| ENSG00000104907                     | 1189.406016                                      | 1609.806184 | 1156.679192 |             |
| 1793.261465                         | 1951.951026                                      | 2505.103787 | 1318.630464 |             |
| 2083.438759                         | -0.65978596                                      | 0.000331901 | 0.005154516 | TRMT1       |
| 19                                  | 13104902                                         | 13117567    | - 3364      |             |
| protein_coding                      | tRNA methyltransferase 1 [Source:HGNC            |             |             |             |
| Symbol;Acc:HGNC:25980]              | -                                                | 1311 1819   | 995 1731    | 1710        |
| 2904                                | 19.08426279                                      | 25.62141747 | 18.4023777  |             |
| 28.59256548                         | 31.24550034                                      | 40.13947085 |             |             |
| ENSG00000125520                     | 1849.88472                                       | 1987.699114 | 2304.05845  |             |

|                                                             |                                                    |             |             |                |                  |
|-------------------------------------------------------------|----------------------------------------------------|-------------|-------------|----------------|------------------|
| 1108.48629                                                  | 1655.163151                                        | 1116.254925 | 2047.214095 |                |                  |
| 1293.301455                                                 | 0.663089562                                        | 0.000333063 | 0.00516803  |                |                  |
| SLC2A4RG                                                    | 20                                                 | 63739861    | 63743505    | +              | 2244             |
| protein_coding                                              | SLC2A4 regulator [Source:HGNC                      |             |             |                |                  |
| Symbol;Acc:HGNC:15930]                                      | Others                                             | 2039        | 2246        | 1982           | 1070 1450        |
| 1294                                                        | 44.49621364                                        | 47.42565527 | 54.95252395 |                |                  |
| 26.49555181                                                 | 39.71846993                                        | 26.81281686 |             |                |                  |
| ENSG00000247679                                             | 8.165258694                                        | 7.964956378 | 22.08734135 |                |                  |
| 44.54664528                                                 | 74.19696883                                        | 79.36279217 | 12.73918547 |                |                  |
| 66.03546876                                                 | -2.39548499                                        | 0.000334548 | 0.00518652  |                |                  |
| AC139795.2                                                  | 5                                                  | 177611253   | 177619754   | +              | 1751             |
| antisense                                                   | novel transcript                                   |             |             |                |                  |
| 19                                                          | 43                                                 | 65          | 92          | 0.251701061    | 0.243547011      |
| 0.675109628                                                 | 1.364565394                                        | 2.281784211 | 2.443051935 |                |                  |
| ENSG00000151445                                             | 577.0116144                                        | 660.2063842 | 557.9959919 |                |                  |
| 780.0842767                                                 | 1014.786235                                        | 1104.177978 | 598.4046635 |                |                  |
| 966.3494966                                                 | -0.691214785                                       | 0.000336829 | 0.005217316 |                |                  |
| VIPAS39 14                                                  | 77426675                                           | 77457952    | -           | 3695           |                  |
| protein_coding                                              | "VPS33B interacting protein, apical-basolateral    |             |             |                |                  |
| polarity regulator, spe-39 homolog [Source:HGNC             | Symbol;Acc:HGNC:20347]"                            |             |             |                |                  |
| 1280                                                        | 8.428908832                                        | 9.566450432 | 8.082275335 | 480            | 753 889          |
| 11.32381009                                                 | 14.78885934                                        | 16.10744084 |             |                |                  |
| ENSG00000148840                                             | 2245.446141                                        | 2472.676458 | 1846.03674  |                |                  |
| 3183.531185                                                 | 2915.370129                                        | 3498.001329 | 2188.053113 |                |                  |
| 3198.967548                                                 | -0.547632705                                       | 0.000337475 | 0.005222749 |                | PPRC1            |
| 10                                                          | 102132994                                          | 102150331   | +           | 6095           |                  |
| protein_coding                                              | "peroxisome proliferator-activated receptor gamma, |             |             |                |                  |
| coactivator-related 1 [Source:HGNC Symbol;Acc:HGNC:30025]"  | -                                                  |             |             |                |                  |
| 2475                                                        | 2794                                               | 1588        | 3073        | 2554           | 4055 19.88520978 |
| 21.72096584                                                 | 16.21002314                                        | 28.01566231 | 25.75695642 |                |                  |
| 30.93486084                                                 |                                                    |             |             |                |                  |
| ENSG00000140807                                             | 88.0033437                                         | 46.01974796 | 61.61205744 |                |                  |
| 2.07193699                                                  | 0                                                  | 18.11541995 | 65.21171637 | 6.72911898     |                  |
| 3.234459683                                                 | 0.000339535                                        | 0.0052464   | NKD1        | 16             |                  |
| 50548330                                                    | 50649249                                           | +           | 17425       | protein_coding |                  |
| naked cuticle homolog 1 [Source:HGNC Symbol;Acc:HGNC:17045] | -                                                  |             |             |                |                  |
| -                                                           | 97                                                 | 52          | 53          | 2              | 0 21             |
| 0.272601117                                                 | 0.141402471                                        | 0.189238688 | 0.006377776 |                | 0                |
| 0.056037342                                                 |                                                    |             |             |                |                  |
| ENSG00000160014                                             | 5683.020051                                        | 5718.838679 | 6286.754843 |                |                  |
| 4437.053064                                                 | 4443.827687                                        | 4246.77202  | 5896.204524 |                |                  |
| 4375.884257                                                 | 0.430144955                                        | 0.000339597 | 0.0052464   |                | CALM3            |
| 19                                                          | 46601074                                           | 46610793    | +           | 3667           |                  |
| protein_coding                                              | calmodulin 3 [Source:HGNC Symbol;Acc:HGNC:1449] -  |             |             |                |                  |
| 6264                                                        | 6462                                               | 5408        | 4283        | 3893           | 4923 83.65068904 |
| 83.49923268                                                 | 91.75560848                                        | 64.90067416 | 65.2560608  |                |                  |
| 62.42376284                                                 |                                                    |             |             |                |                  |
| ENSG00000196155                                             | 26.31027801                                        | 41.5947722  | 34.8747495  |                | 0                |
| 5.707459141                                                 | 0                                                  | 34.25993324 | 1.90248638  |                |                  |

|                                                                     |                 |             |                |        |  |
|---------------------------------------------------------------------|-----------------|-------------|----------------|--------|--|
| 4.252078009                                                         | 0.000340872     | 0.005261505 | PLEKHG4 16     |        |  |
| 67277510                                                            | 67289499        | + 7328      | protein_coding |        |  |
| pleckstrin homology and RhoGEF domain containing G4 [Source:HGNC    |                 |             |                |        |  |
| Symbol;Acc:HGNC:24501]                                              | -               | 29 47       | 30 0           | 5      |  |
| 0                                                                   | 0.193794399     | 0.303905695 | 0.254708032    | 0      |  |
| 0.041940336                                                         | 0               |             |                |        |  |
| ENSG00000144567                                                     | 1735.571098     | 1814.240064 | 1868.124081    |        |  |
| 2238.727917                                                         | 2741.863371     | 2771.659252 | 1805.978414    |        |  |
| 2584.083514                                                         | -0.517101661    | 0.00034452  | 0.00530997     |        |  |
| RETREG2 2                                                           | 219176225       | 219185479   | + 5689         |        |  |
| protein_coding reticulophagy regulator family member 2 [Source:HGNC |                 |             |                |        |  |
| Symbol;Acc:HGNC:28450]                                              | -               | 1913 2050   | 1607 2161      | 2402   |  |
| 3213                                                                | 16.46674347     | 17.07435741 | 17.57465424    |        |  |
| 21.10721222                                                         | 25.95281252     | 26.26067046 |                |        |  |
| ENSG00000119950                                                     | 488.1010197     | 441.6125814 | 667.270207     |        |  |
| 992.4578181                                                         | 864.1093139     | 807.4301464 | 532.327936     |        |  |
| 887.9990928                                                         | -0.739991747    | 0.000344612 | 0.00530997     | MXI1   |  |
| 10                                                                  | 110207605       | 110287365   | + 4607         |        |  |
| protein_coding "MAX interactor 1, dimerization protein [Source:HGNC |                 |             |                |        |  |
| Symbol;Acc:HGNC:7534]"                                              | bHLH            | 538 499     | 574 958        | 757    |  |
| 936                                                                 | 5.718639859     | 5.132261472 | 7.751763723    |        |  |
| 11.55471773                                                         | 10.10008497     | 9.446885566 |                |        |  |
| ENSG00000158792                                                     | 520.7620545     | 675.2513018 | 676.5701402    |        |  |
| 658.8759628                                                         | 1308.149635     | 1634.700991 | 624.1944988    |        |  |
| 1200.57553                                                          | -0.944384186    | 0.000349291 | 0.005377386    |        |  |
| SPATA2L 16                                                          | 89696343        | 89701705    | - 2482         |        |  |
| protein_coding spermatogenesis associated 2 like [Source:HGNC       |                 |             |                |        |  |
| Symbol;Acc:HGNC:28393]                                              | -               | 574 763     | 582 636        | 1146   |  |
| 1895                                                                | 11.32501534     | 14.56629837 | 14.58908498    |        |  |
| 14.23860303                                                         | 28.38116383     | 35.50082578 |                |        |  |
| ENSG00000139737                                                     | 304.8363246     | 323.908226  | 305.7353039    |        |  |
| 486.9051926                                                         | 583.3023242     | 500.3306463 | 311.4932848    |        |  |
| 523.512721                                                          | -0.748172343    | 0.000350963 | 0.005398417    | SLAIN1 |  |
| 13                                                                  | 77697854        | 77764242    | + 4133         |        |  |
| protein_coding SLAIN motif family member 1 [Source:HGNC             |                 |             |                |        |  |
| Symbol;Acc:HGNC:26387]                                              | -               | 336 366     | 263 470        | 511    |  |
| 580                                                                 | 3.981095133     | 4.196064168 | 3.959106549    |        |  |
| 6.318943851                                                         | 7.599812105     | 6.525196678 |                |        |  |
| ENSG00000278981                                                     | 0 0.884995153   | 0           | 8.287747959    |        |  |
| 18.26386925                                                         | 38.81875704     | 0.294998384 |                |        |  |
| 21.79012475                                                         | -5.962907164    | 0.000352271 | 0.005413826    |        |  |
| AC079298.1                                                          | 4 154235980     | 154237598   | + 1619         |        |  |
| antisense "novel transcript, antisense to DCHS2" -                  |                 |             |                |        |  |
| 0                                                                   | 1 0             | 8 16        | 45 0           |        |  |
| 0.029267093                                                         | 0 0.274571327   | 0.607463928 | 1.292399208    |        |  |
| ENSG00000163719                                                     | 992.5325568     | 1316.872788 | 992.767869     |        |  |
| 1425.492649                                                         | 1744.199513     | 2058.256762 | 1100.724405    |        |  |
| 1742.649641                                                         | -0.662667332    | 0.000352589 | 0.005414011    | MTMR14 |  |
| 3                                                                   | 9649433 9702393 | + 6019      | protein_coding |        |  |
| myotubularin related protein 14 [Source:HGNC Symbol;Acc:HGNC:26190] |                 |             |                |        |  |



|                                                                 |                                                  |             |                                   |             |              |             |        |  |
|-----------------------------------------------------------------|--------------------------------------------------|-------------|-----------------------------------|-------------|--------------|-------------|--------|--|
| -                                                               | 1094                                             | 1488        | 854                               | 1376        | 1528         | 2386        |        |  |
| 8.900648742                                                     | 11.71399485                                      |             | 8.827553818                       |             | 12.70299521  |             |        |  |
| 15.60437473                                                     | 18.43219745                                      |             |                                   |             |              |             |        |  |
| ENSG00000100567                                                 | 1578.616681                                      |             | 1571.751392                       |             | 1607.725952  |             |        |  |
| 1229.694603                                                     | 1026.201154                                      |             | 979.9579554                       |             | 1586.031342  |             |        |  |
| 1078.617904                                                     | 0.556447736                                      |             | 0.000353003                       |             | 0.005415667  |             | PSMA3  |  |
| 14                                                              | 58244831                                         |             | 58272012                          |             | +            | 3119        |        |  |
| protein_coding                                                  | proteasome subunit alpha 3 [Source:HGNC          |             |                                   |             |              |             |        |  |
| Symbol;Acc:HGNC:9532]                                           | -                                                |             | 1740                              | 1776        | 1383         | 1187        | 899    |  |
| 1136                                                            | 27.31885903                                      |             | 26.9807506                        |             | 27.58758295  |             |        |  |
| 21.14693293                                                     | 17.71706087                                      |             | 16.93534213                       |             |              |             |        |  |
| ENSG00000108468                                                 | 2562.983979                                      |             | 2575.335896                       |             | 2364.508016  |             |        |  |
| 1955.908518                                                     | 1731.643103                                      |             | 1415.590673                       |             | 2500.94263   |             |        |  |
| 1701.047432                                                     | 0.556708738                                      |             | 0.000354672                       |             | 0.005436568  |             | CBX1   |  |
| 17                                                              | 48070052                                         |             | 48101521                          |             | -            | 3087        |        |  |
| protein_coding                                                  | chromobox 1 [Source:HGNC Symbol;Acc:HGNC:1551]   |             |                                   |             |              |             | -      |  |
| 2825                                                            | 2910                                             | 2034        | 1888                              | 1517        | 1641         | 44.81366943 |        |  |
| 44.66659022                                                     |                                                  | 40.99408202 |                                   | 33.98422764 |              | 30.20621516 |        |  |
| 24.71741047                                                     |                                                  |             |                                   |             |              |             |        |  |
| ENSG00000241749                                                 | 98.89035529                                      |             | 232.7537253                       |             | 136.011523   |             |        |  |
| 258.9921237                                                     | 353.8624667                                      |             | 492.5668949                       |             | 155.8852012  |             |        |  |
| 368.4738284                                                     | -1.240532256                                     |             | 0.000355342                       |             | 0.005442115  |             |        |  |
| RPSAP52                                                         | 12                                               | 65758020    | 65826997                          |             | -            | 2035        |        |  |
| transcribed_processed_pseudogene                                | ribosomal protein SA                             |             |                                   |             |              |             |        |  |
| pseudogene 52 [Source:HGNC Symbol;Acc:HGNC:35752]               |                                                  |             |                                   |             | -            |             | 109    |  |
| 263                                                             | 117                                              | 250         | 310                               | 571         | 2.622954566  |             |        |  |
| 6.123754559                                                     | 3.577077049                                      |             | 6.826335651                       |             | 9.36363854   |             |        |  |
| 13.04676118                                                     |                                                  |             |                                   |             |              |             |        |  |
| ENSG00000179119                                                 | 905.436464                                       |             | 838.09041                         |             | 838.1564796  |             |        |  |
| 1522.873688                                                     | 1179.161059                                      |             | 1215.458415                       |             | 860.5611179  |             |        |  |
| 1305.831054                                                     | -0.601421686                                     |             | 0.00035642                        |             | 0.005453906  |             |        |  |
| SPTY2D1                                                         | 11                                               | 18606401    | 18634791                          |             | -            | 6005        |        |  |
| protein_coding                                                  | SPT2 chromatin protein domain containing 1       |             |                                   |             |              |             |        |  |
| [Source:HGNC Symbol;Acc:HGNC:26818]                             |                                                  |             |                                   |             | -            | 998         | 947    |  |
| 1470                                                            | 1033                                             | 1409        | 8.13853458                        |             | 7.472456716  |             | 721    |  |
| 7.470146166                                                     | 13.60242583                                      |             | 10.57388712                       |             | 10.91010674  |             |        |  |
| ENSG00000144460                                                 | 0                                                | 0           | 0                                 | 9.323716454 | 34.24475485  |             |        |  |
| 6.901112362                                                     | 0                                                |             | 16.82319455                       |             | -6.544026722 |             |        |  |
| 0.000358631                                                     | 0.005482999                                      |             | NYAP2                             | 2           | 225399710    |             |        |  |
| 225654018                                                       | +                                                | 5461        | protein_coding neuronal tyrosine- |             |              |             |        |  |
| phosphorylated phosphoinositide-3-kinase adaptor 2 [Source:HGNC |                                                  |             |                                   |             |              |             |        |  |
| Symbol;Acc:HGNC:29291]                                          | -                                                |             | 0                                 | 0           | 0            | 9           | 30     |  |
| 8                                                               | 0                                                | 0           | 0                                 | 0.091576149 | 0.337673079  |             |        |  |
| 0.068115952                                                     |                                                  |             |                                   |             |              |             |        |  |
| ENSG00000103742                                                 | 438.2022166                                      |             | 523.9171306                       |             | 481.2715431  |             |        |  |
| 319.0782964                                                     | 205.4685291                                      |             | 91.4397388                        |             | 481.1302968  |             |        |  |
| 205.3288548                                                     | 1.231115926                                      |             | 0.000364856                       |             | 0.005564677  |             | IGDCC4 |  |
| 15                                                              | 65381464                                         |             | 65423072                          |             | -            | 7764        |        |  |
| protein_coding                                                  | immunoglobulin superfamily DCC subclass member 4 |             |                                   |             |              |             |        |  |
| [Source:HGNC Symbol;Acc:HGNC:13770]                             |                                                  |             | -                                 |             | 483          | 592         | 414    |  |

|                                    |                                                                                              |             |             |             |                    |
|------------------------------------|----------------------------------------------------------------------------------------------|-------------|-------------|-------------|--------------------|
| 308                                | 180                                                                                          | 106         | 3.046423575 | 3.612955569 |                    |
| 3.317581962                        | 2.204333158                                                                                  |             | 1.4250639   | 0.634821105 |                    |
| ENSG00000134242                    | 621.4669117                                                                                  |             | 565.5119028 | 430.1219105 |                    |
| 1003.853472                        | 834.4305264                                                                                  |             | 820.3697321 | 539.033575  |                    |
| 886.21791                          | -0.715571048                                                                                 |             | 0.000364864 | 0.005564677 | PTPN22             |
| 1                                  | 113813811                                                                                    |             | 113871759   | - 4503      |                    |
| protein_coding                     | "protein tyrosine phosphatase, non-receptor type 22 [Source:HGNC Symbol;Acc:HGNC:9652]"      |             |             |             |                    |
|                                    |                                                                                              |             | -           | 685 639     | 370                |
| 969                                | 731                                                                                          | 951         | 7.44933162  | 6.723963574 |                    |
| 5.11218573                         | 11.9573206                                                                                   |             | 9.978443215 | 9.819957046 |                    |
| ENSG00000164283                    | 88.0033437                                                                                   |             | 96.46447169 | 68.58700734 |                    |
| 192.6901401                        | 187.2046598                                                                                  |             | 194.9564242 | 84.35160758 |                    |
| 191.6170747                        | -1.180445106                                                                                 |             | 0.000364917 | 0.005564677 | ESM1               |
| 5                                  | 54977864                                                                                     |             | 55022671    | - 2695      |                    |
| protein_coding                     | endothelial cell specific molecule 1 [Source:HGNC Symbol;Acc:HGNC:3466]                      |             |             |             |                    |
|                                    |                                                                                              |             | -           | 97 109      | 59 186 164         |
| 226                                | 1.762550821                                                                                  |             | 1.916435333 | 1.362072074 |                    |
| 3.835007506                        | 3.740523941                                                                                  |             | 3.899246471 |             |                    |
| ENSG00000100097                    | 9271.197621                                                                                  |             | 12746.58519 | 18945.12642 |                    |
| 7097.420159                        | 9659.30385                                                                                   |             | 7985.449642 | 13654.30308 |                    |
| 8247.391217                        | 0.727273537                                                                                  |             | 0.000367718 | 0.005602553 | LGALS1             |
| 22                                 | 37675608                                                                                     |             | 37679806    | + 1099      |                    |
| protein_coding                     | galectin 1 [Source:HGNC Symbol;Acc:HGNC:6561]                                                |             |             |             |                    |
|                                    |                                                                                              |             |             |             | -                  |
| 10219                              | 14403                                                                                        | 16297       | 6851        | 8462        | 9257 455.3437609   |
| 620.9858568                        |                                                                                              | 922.607158  |             | 346.3923712 | 473.2849437        |
| 391.6549226                        |                                                                                              |             |             |             |                    |
| ENSG00000223756                    | 58.06406182                                                                                  |             | 91.15450077 | 10.46242485 |                    |
| 186.4743291                        | 162.0918396                                                                                  |             | 243.2642108 | 53.22699581 |                    |
| 197.2767932                        | -1.881284822                                                                                 |             | 0.000368189 | 0.005604897 | TSSC2              |
| 11                                 | 3380961                                                                                      | 3408978     | +           | 3666        |                    |
| transcribed_unprocessed_pseudogene | tumor suppressing subtransferable candidate 2 pseudogene [Source:HGNC Symbol;Acc:HGNC:12384] |             |             |             |                    |
|                                    |                                                                                              |             | -           | 64 103      | 9 180 142          |
| 282                                | 0.854901732                                                                                  |             | 1.331285509 | 0.152741445 |                    |
| 2.728299781                        | 2.380911452                                                                                  |             | 3.576742423 |             |                    |
| ENSG00000099821                    | 2708.144133                                                                                  |             | 3173.592619 | 2884.141783 |                    |
| 3326.494837                        | 4681.257987                                                                                  |             | 5410.472092 | 2921.959512 |                    |
| 4472.741639                        | -0.614341495                                                                                 |             | 0.000371667 | 0.005652976 | POLRMT             |
| 19                                 | 617224                                                                                       | 633604      | -           | 5124        | protein_coding RNA |
| polymerase mitochondrial           | [Source:HGNC Symbol;Acc:HGNC:9200]                                                           |             |             |             |                    |
|                                    |                                                                                              |             |             |             | -                  |
| 2985                               | 3586                                                                                         | 2481        | 3211        | 4101        | 6272 28.52751208   |
| 33.16099896                        |                                                                                              | 30.12482202 |             | 34.82115947 | 49.19579786        |
| 56.91515812                        |                                                                                              |             |             |             |                    |
| ENSG00000189060                    | 4569.823116                                                                                  |             | 4536.485155 | 6300.704742 |                    |
| 3948.075934                        | 3328.590171                                                                                  |             | 2957.989286 | 5135.671004 |                    |
| 3411.551797                        | 0.589983716                                                                                  |             | 0.00037443  | 0.005689256 | H1F0               |
| 22                                 | 37805093                                                                                     |             | 37807436    | + 2344      |                    |
| protein_coding                     | H1 histone family member 0 [Source:HGNC Symbol;Acc:HGNC:4714]                                |             |             |             |                    |
|                                    |                                                                                              |             | -           | 5037 5126   | 5420 3811 2916     |
| 3429                               | 105.2308376                                                                                  |             | 103.620918  | 143.8628057 |                    |

|                                     |                                                   |             |                |             |             |             |
|-------------------------------------|---------------------------------------------------|-------------|----------------|-------------|-------------|-------------|
| 90.34276641                         | 76.46756704                                       | 68.02066851 |                |             |             |             |
| ENSG00000144021                     | 2347.058249                                       | 2918.714015 | 2136.659653    |             |             |             |
| 3397.976663                         | 3874.223265                                       | 3492.825494 | 2467.477305    |             |             |             |
| 3588.341807                         | -0.539727901                                      | 0.000374695 | 0.005689256    |             |             | CIA01       |
| 2                                   | 96266132                                          | 96273349    | + 4031         |             |             |             |
| protein_coding                      | cytosolic iron-sulfur assembly component 1        |             |                |             |             |             |
| [Source:HGNC Symbol;Acc:HGNC:14280] | -                                                 | 2587        | 3298           |             |             | 1838        |
| 3280                                | 3394                                              | 4049        | 31.4276794     | 38.76718743 |             |             |
| 28.36870789                         | 45.21401658                                       | 51.75429536 | 46.7052818     |             |             |             |
| ENSG00000271447                     | 16.33051739                                       | 27.43484975 | 5.812458249    |             |             | 0           |
| 0                                   | 0                                                 | 16.52594179 | 0              | 6.483400473 |             |             |
| 0.000378535                         | 0.005742636                                       | MMP28       | 17             | 35756249    |             |             |
| 35795707                            | -                                                 | 2858        | protein_coding | matrix      |             |             |
| metallopeptidase                    | 28 [Source:HGNC Symbol;Acc:HGNC:14366]            |             |                |             | -           | 18          |
| 31                                  | 5                                                 | 0           | 0              | 0           | 0.308417466 |             |
| 0.513955964                         | 0.10884654                                        | 0           | 0              | 0           |             |             |
| ENSG00000182010                     | 510.7822938                                       | 485.8623391 | 425.4719439    |             |             |             |
| 289.0352101                         | 243.1377594                                       | 94.02765594 | 474.0388589    |             |             |             |
| 208.7335418                         | 1.18687798                                        | 0.000384164 | 0.005823037    |             |             | RTKN2       |
| 10                                  | 62183035                                          | 62268707    | -              | 9548        |             |             |
| protein_coding                      | rhotekin 2 [Source:HGNC Symbol;Acc:HGNC:19364]    |             |                |             | -           |             |
| 563                                 | 549                                               | 366         | 279            | 213         | 109         | 2.887517786 |
|                                     | 2.724497257                                       | 2.384929369 | 1.623692694    | 1.37124341  |             |             |
|                                     | 0.530817345                                       |             |                |             |             |             |
| ENSG00000136518                     | 2215.506859                                       | 2027.523896 | 2281.971109    |             |             |             |
| 1695.880426                         | 1483.939377                                       | 1264.62884  | 2175.000621    |             |             |             |
| 1481.482881                         | 0.554267241                                       | 0.000385449 | 0.005837509    |             |             | ACTL6A      |
| 3                                   | 179562880                                         | 179588408   | + 3675         |             |             |             |
| protein_coding                      | actin like 6A [Source:HGNC Symbol;Acc:HGNC:24124] |             |                |             |             |             |
| -                                   | 2442                                              | 2291        | 1963           | 1637        | 1300        | 1466        |
| 32.53995888                         | 29.53889102                                       | 33.23301953 | 24.75160579    |             |             |             |
| 21.74369608                         | 18.54845091                                       |             |                |             |             |             |
| ENSG00000088387                     | 1314.60665                                        | 1160.228646 | 1084.604709    |             |             |             |
| 1662.729434                         | 1685.98343                                        | 1807.2288   | 1186.480002    |             |             |             |
| 1718.647221                         | -0.534250352                                      | 0.000386215 | 0.005844099    |             |             | DOCK9       |
| 13                                  | 98793429                                          | 99086625    | -              | 14816       |             |             |
| protein_coding                      | dedicator of cytokinesis 9 [Source:HGNC           |             |                |             |             |             |
| Symbol;Acc:HGNC:14132]              | -                                                 | 1449        | 1311           | 933         | 1605        | 1477        |
| 2095                                | 4.789234471                                       | 4.192742234 | 3.917937656    |             |             |             |
| 6.019440293                         | 6.12769141                                        | 6.574823157 |                |             |             |             |
| ENSG00000110042                     | 14.51601546                                       | 16.81490791 | 27.8997996     |             |             |             |
| 17.61146441                         | 148.3939377                                       | 151.824472  | 19.74357432    |             |             |             |
| 105.9432913                         | -2.431657525                                      | 0.000386585 | 0.005844707    |             |             | DTX4        |
| 11                                  | 59171430                                          | 59208587    | + 6072         |             |             |             |
| protein_coding                      | deltex E3 ubiquitin ligase 4 [Source:HGNC         |             |                |             |             |             |
| Symbol;Acc:HGNC:29151]              | -                                                 | 16          | 19             | 24          | 17          | 130         |
| 176                                 | 0.129037786                                       | 0.14826829  | 0.245915739    |             |             |             |
| 0.1555712                           | 1.316009273                                       | 1.347758014 |                |             |             |             |
| ENSG00000204387                     | 355.6423787                                       | 507.9872179 | 537.0711423    |             |             |             |
| 160.5751167                         | 297.9293672                                       | 244.1268498 | 466.9002463    |             |             |             |

|                                     |                                              |               |                        |        |
|-------------------------------------|----------------------------------------------|---------------|------------------------|--------|
| 234.2104446                         | 0.995382339                                  | 0.00038902    | 0.005876498            |        |
| C6orf48 6                           | 31834608                                     | 31839766      | + 1801                 |        |
| protein_coding                      | chromosome 6 open reading frame              | 48            | [Source:HGNC           |        |
| Symbol;Acc:HGNC:19078]              | -                                            | 392 574       | 462 155                | 261    |
| 283                                 | 10.65862144                                  | 15.10165764   | 15.96008167            |        |
| 4.782225259                         | 8.907875832                                  | 7.306404983   |                        |        |
| ENSG00000187951                     | 205.9459693                                  | 184.0789918   | 97.64929859            |        |
| 76.66166862                         | 44.5181813                                   | 50.03306463   | 162.5580866            |        |
| 57.07097152                         | 1.512521465                                  | 0.000389893   | 0.005884663            |        |
| AC091057.1                          | 15 30658717                                  | 30772993      | + 5637                 |        |
| processed_transcript                | OTU deubiquitinase 7A pseudogene             |               |                        |        |
| [Source:NCBI gene;Acc:100288637]    | -                                            | 227 208       | 84                     |        |
| 74 39 58                            | 1.971998162                                  | 1.748403797   |                        |        |
| 0.927124585                         | 0.729450336                                  | 0.425269202   | 0.478421818            |        |
| ENSG00000184787                     | 3282.433995                                  | 3655.029982   | 2214.546593            |        |
| 4029.917445                         | 4771.435842                                  | 5666.675888   | 3050.67019             |        |
| 4822.676392                         | -0.660366938                                 | 0.000393581   | 0.005935252            | UBE2G2 |
| 21                                  | 44768580                                     | 44802019      | - 7388                 |        |
| protein_coding                      | ubiquitin conjugating enzyme E2 G2           | [Source:HGNC  |                        |        |
| Symbol;Acc:HGNC:12483]              | -                                            | 3618 4130     | 1905 3890              | 4180   |
| 6569                                | 23.98116953                                  | 26.48802671   | 16.04260682            |        |
| 29.25733458                         | 34.77737155                                  | 41.34313383   |                        |        |
| ENSG00000167779                     | 97.07585336                                  | 100.8894475   | 231.3358383            |        |
| 56.97826722                         | 33.10326302                                  | 43.13195226   | 143.1003797            |        |
| 44.40449417                         | 1.683342546                                  | 0.000396102   | 0.00596818             | IGFBP6 |
| 12                                  | 53097436                                     | 53102345      | + 1346                 |        |
| protein_coding                      | insulin like growth factor binding protein 6 |               |                        |        |
| [Source:HGNC Symbol;Acc:HGNC:5475]  | -                                            | 107 114       | 199                    |        |
| 55 29 50                            | 3.892847594                                  | 4.013157758   |                        |        |
| 9.198454472                         | 2.270542698                                  | 1.324342445   | 1.727253027            |        |
| ENSG00000279484                     | 0 0                                          | 0 8.287747959 | 4.565967313            |        |
| 38.81875704                         | 0                                            | 17.22415744   | -6.587567049           |        |
| 0.000398626                         | 0.006001101                                  | KLHL30-AS1    | 2 238152889            |        |
| 238155994                           | -                                            | 3106 TEC      | KLHL30 antisense RNA 1 |        |
| [Source:HGNC Symbol;Acc:HGNC:31018] | -                                            | 0 0 0         | 0 0 0                  |        |
| 8 4 45                              | 0 0                                          | 0 0.143120083 |                        |        |
| 0.079160021                         | 0.673662047                                  |               |                        |        |
| ENSG00000154832                     | 1574.987677                                  | 2175.318086   | 1803.024549            |        |
| 2403.446908                         | 2771.542159                                  | 3177.099604   | 1851.110104            |        |
| 2784.029557                         | -0.588864785                                 | 0.000400681   | 0.006026915            | CXXC1  |
| 18                                  | 50282343                                     | 50288304      | - 4319                 |        |
| protein_coding                      | CXXC finger protein 1                        | [Source:HGNC  |                        |        |
| Symbol;Acc:HGNC:24343]              | -                                            | 1736 2458     | 1551 2320              | 2428   |
| 3683                                | 19.68317711                                  | 26.96653307   | 22.342689              |        |
| 29.84810917                         | 34.55515446                                  | 39.65057895   |                        |        |
| ENSG00000198727                     | 22814.64004                                  | 23627.6006    | 16920.06596            |        |
| 26397.51322                         | 31102.22784                                  | 35080.07942   | 21120.76887            |        |
| 30859.94016                         | -0.547023255                                 | 0.000403893   | 0.006070058            | MT-CYB |
| MT                                  | 14747 15887                                  | + 1141        | protein_coding         |        |
| mitochondrially                     | encoded cytochrome b                         | [Source:HGNC  |                        |        |

|                                                               |                                                                                      |             |             |             |             |        |
|---------------------------------------------------------------|--------------------------------------------------------------------------------------|-------------|-------------|-------------|-------------|--------|
| Symbol;Acc:HGNC:7427]                                         | -                                                                                    | 25147       | 26698       | 14555       | 25481       | 27247  |
| 40666                                                         | 1079.267802                                                                          | 1108.713984 |             | 793.658025  |             |        |
| 1240.91738                                                    | 1467.845709                                                                          | 1657.207271 |             |             |             |        |
| ENSG00000106462                                               | 1167.631993                                                                          | 1008.009479 |             | 857.9188376 |             |        |
| 759.3649068                                                   | 536.5011592                                                                          | 546.0505157 |             | 1011.18677  |             |        |
| 613.9721939                                                   | 0.720579398                                                                          | 0.000408693 |             | 0.006136984 |             | EZH2   |
| 7                                                             | 148807383                                                                            | 148884321   |             | -           | 4522        |        |
| protein_coding subunit                                        | enhancer of zeste 2 polycomb repressive complex 2 [Source:HGNC Symbol;Acc:HGNC:3527] |             |             | -           | 1287        | 1139   |
| 738                                                           | 733                                                                                  | 470         | 633         | 13.93723659 | 11.9349226  |        |
| 10.15389459                                                   | 9.007109868                                                                          | 6.388731849 | 6.508848607 |             |             |        |
| ENSG00000204256                                               | 4563.472359                                                                          | 5076.332198 |             | 4576.729626 |             |        |
| 5734.085619                                                   | 6925.430922                                                                          | 7021.01919  |             | 4738.844728 |             |        |
| 6560.178577                                                   | -0.469154238                                                                         | 0.000409459 |             | 0.006143268 |             | BRD2   |
| 6                                                             | 32968660                                                                             | 32981505    |             | +           | 7337        |        |
| protein_coding Symbol;Acc:HGNC:1103]                          | bromodomain containing 2 [Source:HGNC -                                              | 5030        | 5736        | 3937        | 5535        | 6067   |
| 8139                                                          | 33.57207228                                                                          | 37.04393081 |             | 33.38518155 |             |        |
| 41.91902278                                                   | 50.82797833                                                                          | 51.58026244 |             |             |             |        |
| ENSG00000148843                                               | 2714.49489                                                                           | 2961.193782 |             | 2261.046259 |             |        |
| 3380.365199                                                   | 3689.301589                                                                          | 4977.427291 |             | 2645.578311 |             |        |
| 4015.698026                                                   | -0.602011814                                                                         | 0.00041408  |             | 0.006207344 |             | PDCD11 |
| 10                                                            | 103396626                                                                            | 103446292   |             | +           | 7670        |        |
| protein_coding Symbol;Acc:HGNC:13408]                         | programmed cell death 11 [Source:HGNC -                                              | 2992        | 3346        | 1945        | 3263        | 3232   |
| 5770                                                          | 19.10270675                                                                          | 20.67078708 |             | 15.77724205 |             |        |
| 23.63925326                                                   | 25.90140653                                                                          | 34.97932844 |             |             |             |        |
| ENSG00000011426                                               | 9938.934332                                                                          | 6871.102369 |             | 8913.985971 |             |        |
| 4339.672025                                                   | 2393.708364                                                                          | 1501.854578 |             | 8574.674224 |             |        |
| 2745.078322                                                   | 1.643300427                                                                          | 0.000415937 |             | 0.006229901 |             | ANLN   |
| 7                                                             | 36389806                                                                             | 36453791    |             | +           | 6012        |        |
| protein_coding Symbol;Acc:HGNC:14082]                         | anillin actin binding protein [Source:HGNC -                                         | 10955       | 7764        | 7668        | 4189        | 2097   |
| 1741                                                          | 89.23230129                                                                          | 61.19176719 |             | 79.35421118 |             |        |
| 38.71715455                                                   | 21.4401006                                                                           | 13.46513827 |             |             |             |        |
| ENSG00000163755                                               | 1207.551036                                                                          | 880.5701774 |             | 1097.392117 |             |        |
| 814.271237                                                    | 560.4724876                                                                          | 500.3306463 |             | 1061.837777 |             |        |
| 625.0247903                                                   | 0.764949971                                                                          | 0.000419725 |             | 0.006281313 |             | HPS3   |
| 3                                                             | 149129584                                                                            | 149173732   |             | +           | 6256        |        |
| protein_coding subunit 1 [Source:HGNC Symbol;Acc:HGNC:15597]" | "HPS3, biogenesis of lysosomal organelles complex 2 -                                |             |             |             | 1331        | 995    |
| 944                                                           | 786                                                                                  | 491         | 580         | 10.41861522 | 7.536206352 |        |
| 9.388194983                                                   | 6.981324896                                                                          | 4.824275624 | 4.310843649 |             |             |        |
| ENSG00000213676                                               | 1242.026572                                                                          | 1046.949266 |             | 1182.254008 |             |        |
| 885.7530631                                                   | 696.3100152                                                                          | 533.973569  |             | 1157.076616 |             |        |
| 705.3455491                                                   | 0.714908761                                                                          | 0.000423354 |             | 0.006330269 |             | ATF6B  |
| 6                                                             | 32115264                                                                             | 32128253    |             | -           | 3629        |        |
| protein_coding Symbol;Acc:HGNC:2349]                          | activating transcription factor 6 beta [Source:HGNC TF_bZIP                          | 1369        | 1183        | 1017        | 855         | 610    |
| 619                                                           | 18.47332894                                                                          | 15.44629117 |             | 17.43575795 |             |        |

|                                                     |                                                        |             |             |             |                |      |
|-----------------------------------------------------|--------------------------------------------------------|-------------|-------------|-------------|----------------|------|
| 13.09155366                                         | 10.33213869                                            | 7.931123251 |             |             |                |      |
| ENSG00000280287                                     | 88.91059467                                            | 100.8894475 | 54.63710754 |             |                |      |
| 168.8628647                                         | 189.4876435                                            | 233.7751813 | 81.47904989 |             |                |      |
| 197.3752298                                         | -1.272087718                                           | 0.00042567  | 0.006355199 |             |                |      |
| AC131212.3                                          | 12                                                     | 132550729   | 132554947   | +           |                | 4219 |
| TEC                                                 | novel transcript                                       | -           | 98          | 114         |                | 47   |
| 163                                                 | 166                                                    | 271         | 1.137483836 | 1.280329543 |                |      |
| 0.693098851                                         | 2.146792763                                            | 2.41849906  | 2.986694372 |             |                |      |
| ENSG00000067596                                     | 2767.115446                                            | 2724.900076 | 2885.304275 |             |                |      |
| 3509.861261                                         | 3869.657298                                            | 4100.986021 | 2792.439933 |             |                |      |
| 3826.83486                                          | -0.454872522                                           | 0.000425859 | 0.006355199 |             |                | DHX8 |
| 17                                                  | 43483865                                               | 43610338    | +           | 10439       |                |      |
| protein_coding                                      | DEAH-box helicase 8 [Source:HGNC Symbol;Acc:HGNC:2749] |             |             |             |                |      |
| -                                                   | 3050                                                   | 3079        | 2482        | 3388        | 3390           | 4754 |
| 14.30769341                                         | 13.97581786                                            | 14.79277754 | 18.03418613 |             |                |      |
| 19.96126962                                         | 21.17538416                                            |             |             |             |                |      |
| ENSG00000196204                                     | 777.5140778                                            | 868.1802452 | 777.7069138 |             |                |      |
| 1105.378384                                         | 1247.650568                                            | 1231.848557 | 807.8004123 |             |                |      |
| 1194.95917                                          | -0.564552993                                           | 0.000426099 | 0.006355199 |             |                |      |
| RNF216P1                                            | 7                                                      | 4973988     | 5040675     | +           | 5510           |      |
| transcribed_unprocessed_pseudogene                  | ring finger protein 216                                |             |             |             |                |      |
| pseudogene 1 [Source:HGNC Symbol;Acc:HGNC:33610]    | -                                                      |             |             |             |                | 857  |
| 981                                                 | 669                                                    | 1067        | 1093        | 1428        | 7.616543146    |      |
| 8.436141379                                         | 7.554076272                                            | 10.760312   | 12.19315019 |             |                |      |
| 12.05057102                                         |                                                        |             |             |             |                |      |
| ENSG00000174945                                     | 119.7571275                                            | 152.2191663 | 115.0866733 |             |                |      |
| 7.251779464                                         | 22.82983656                                            | 60.38473317 | 129.0209891 |             |                |      |
| 30.15544973                                         | 2.085659406                                            | 0.000432805 | 0.006449776 |             |                | AMZ1 |
| 7                                                   | 2679522                                                | 2775500     | +           | 7011        | protein_coding |      |
| archaelysin family metalloproteinase 1 [Source:HGNC |                                                        |             |             |             |                |      |
| Symbol;Acc:HGNC:22231]                              | -                                                      | 132         | 172         | 99          | 7              | 20   |
| 70                                                  | 0.921982436                                            | 1.16245171  | 0.878541081 |             |                |      |
| 0.055479191                                         | 0.175346616                                            | 0.464246984 |             |             |                |      |
| ENSG00000276071                                     | 0.907250966                                            | 0           | 0           | 7.251779464 |                |      |
| 47.94265678                                         | 11.21430759                                            | 0.302416989 |             |             |                |      |
| 22.13624795                                         | -5.978253284                                           | 0.000433482 | 0.006454435 |             |                |      |
| AC074138.1                                          | 19                                                     | 36668102    | 36669404    | +           |                | 1303 |
| lincRNA                                             | novel transcript                                       | -           | 1           | 0           |                | 0    |
| 7                                                   | 42                                                     | 13          | 0.037582379 | 0           | 0              |      |
| 0.298514663                                         | 1.981309103                                            | 0.463905963 |             |             |                |      |
| ENSG00000162733                                     | 3262.474474                                            | 2573.565905 | 2878.329325 |             |                |      |
| 2320.569429                                         | 1844.650794                                            | 1384.535668 | 2904.789901 |             |                |      |
| 1849.91863                                          | 0.651425346                                            | 0.000435387 | 0.006477349 |             |                | DDR2 |
| 1                                                   | 162631373                                              | 162787400   | +           | 10730       |                |      |
| protein_coding                                      | discoidin domain receptor tyrosine kinase 2            |             |             |             |                |      |
| [Source:HGNC Symbol;Acc:HGNC:2731]                  | -                                                      |             |             |             |                | 2476 |
| 2240                                                | 1616                                                   | 1605        | 16.41151389 | 12.84165864 |                |      |
| 14.35680379                                         | 11.60006279                                            | 9.257399259 | 6.955147312 |             |                |      |
| ENSG00000178209                                     | 15161.97814                                            | 16279.48584 | 16245.82081 |             |                |      |
| 12843.9374                                          | 11063.3388                                             | 11884.57813 | 15895.7616  |             |                |      |

|                 |                                                                                          |             |                         |       |
|-----------------|------------------------------------------------------------------------------------------|-------------|-------------------------|-------|
| 11930.61811     | 0.413929724                                                                              | 0.000442036 | 0.006570729             | PLEC  |
| 8               | 143915147                                                                                | 143976734   | - 16991                 |       |
| protein_coding  | plectin [Source:HGNC Symbol;Acc:HGNC:9069]                                               |             |                         | -     |
| 16712           | 18395 13975                                                                              | 12398 9692  | 13777 48.16573264       |       |
|                 | 51.29881028                                                                              | 51.17286393 | 40.54569375 35.062415   |       |
|                 | 37.7022038                                                                               |             |                         |       |
| ENSG00000142871 | 3215.297423                                                                              | 3907.253601 | 3807.160153             |       |
| 2945.258431     | 2223.626081                                                                              | 2352.416676 | 3643.237059             |       |
| 2507.100396     | 0.539110948                                                                              | 0.000442737 | 0.006572074             | CYR61 |
| 1               | 85580761                                                                                 | 85583962    | + 2455                  |       |
| protein_coding  | cysteine rich angiogenic inducer 61 [Source:HGNC Symbol;Acc:HGNC:2654]                   |             |                         | -     |
| 2727            | 70.6921028                                                                               | 85.21296017 | 82.99781408             | 1948  |
| 64.34834875     | 48.77360045                                                                              | 51.64932613 |                         |       |
| ENSG00000167112 | 1180.333507                                                                              | 1325.722739 | 1367.09018              |       |
| 1527.017561     | 2161.985523                                                                              | 2244.586796 | 1291.048809             |       |
| 1977.863293     | -0.615790667                                                                             | 0.000442869 | 0.006572074             | TRUB2 |
| 9               | 128305161                                                                                | 128322742   | - 6125                  |       |
| protein_coding  | TruB pseudouridine synthase family member 2 [Source:HGNC Symbol;Acc:HGNC:17170]          |             |                         | -     |
| 1474            | 1894 2602                                                                                | 10.40159373 | 11.58863171             | 1176  |
| 11.94560294     | 13.37221757                                                                              | 19.00733556 | 19.7529615              |       |
| ENSG00000033050 | 538.9070738                                                                              | 556.6619513 | 549.8585504             |       |
| 774.9044342     | 788.7708533                                                                              | 1074.84825  | 548.4758585             |       |
| 879.507846      | -0.682284785                                                                             | 0.000443937 | 0.006580849             | ABCF2 |
| 7               | 151212490                                                                                | 151227230   | - 4177                  |       |
| protein_coding  | ATP binding cassette subfamily F member 2 [Source:HGNC Symbol;Acc:HGNC:71]               |             |                         | -     |
| 1246            | 6.963869969                                                                              | 7.135306136 | 7.045365235             | 691   |
| 9.950597656     | 10.16859458                                                                              | 13.87025946 |                         |       |
| ENSG00000149016 | 465.4197455                                                                              | 539.8470434 | 455.6967268             |       |
| 585.3221996     | 920.0424135                                                                              | 1042.067967 | 486.9878386             |       |
| 849.1441933     | -0.802105575                                                                             | 0.000444205 | 0.006580849             | TUT1  |
| 11              | 62575045                                                                                 | 62592177    | - 4082                  |       |
| protein_coding  | "terminal uridylyl transferase 1, U6 snRNA-specific [Source:HGNC Symbol;Acc:HGNC:26184]" |             |                         | -     |
| 565             | 806 1208                                                                                 | 6.154220439 | 7.080815452             | 392   |
| 5.974752412     | 7.691082875                                                                              | 12.1369455  | 13.76020652             |       |
| ENSG00000115053 | 17637.86603                                                                              | 17068.01652 | 17364.13777             |       |
| 14390.63836     | 11693.44229                                                                              | 12561.74978 | 17356.67344             |       |
| 12881.94348     | 0.430120192                                                                              | 0.000445896 | 0.006600374             | NCL   |
| 2               | 231453531                                                                                | 231483641   | - 6929                  |       |
| protein_coding  | nucleolin [Source:HGNC Symbol;Acc:HGNC:7667]                                             |             |                         | -     |
| 19441           | 19286 14937                                                                              | 13891 10244 | 14562 137.396833        |       |
|                 | 131.8858012                                                                              | 134.1218905 | 111.3973844 90.87540694 |       |
|                 | 97.71955566                                                                              |             |                         |       |
| ENSG00000117226 | 518.0403016                                                                              | 406.2127753 | 567.2959251             |       |
| 346.0134773     | 228.2983656                                                                              | 227.736708  | 497.1830007             |       |
| 267.349517      | 0.894611277                                                                              | 0.000448539 | 0.006633948             | GBP3  |
| 1               | 89006666                                                                                 | 89022894    | - 4297                  |       |

|                        |                                                  |              |                       |             |       |        |
|------------------------|--------------------------------------------------|--------------|-----------------------|-------------|-------|--------|
| protein_coding         | guanylate binding protein 3                      | [Source:HGNC |                       |             |       |        |
| Symbol;Acc:HGNC:4184]  | -                                                | 571          | 459                   | 488         | 334   | 200    |
| 264                    | 6.507279158                                      | 5.061436268  |                       | 7.065799585 |       |        |
| 4.31909898             | 2.860961425                                      | 2.856732603  |                       |             |       |        |
| ENSG00000126883        | 1565.915167                                      | 1745.210442  |                       | 1357.790247 |       |        |
| 2175.533839            | 2198.513261                                      | 2330.8507    |                       | 1556.305285 |       |        |
| 2234.965934            | -0.521574835                                     | 0.00045013   |                       | 0.006651926 |       | NUP214 |
| 9                      | 131125561                                        | 131234670    |                       | +           | 13062 |        |
| protein_coding         | nucleoporin 214                                  | [Source:HGNC | Symbol;Acc:HGNC:8064] |             |       |        |
| -                      | 1726                                             | 1972         | 1168                  | 2100        | 1926  | 2702   |
| 6.470827098            | 7.153583849                                      | 5.563396462  |                       | 8.933500354 |       |        |
| 9.063458772            | 9.618485251                                      |              |                       |             |       |        |
| ENSG00000198682        | 620.5596607                                      | 469.9324263  |                       | 747.4821309 |       |        |
| 308.7186115            | 336.7400893                                      | 395.9513218  |                       | 612.6580726 |       |        |
| 347.1366742            | 0.817364576                                      | 0.0004521    |                       | 0.006675462 |       | PAPSS2 |
| 10                     | 87659613                                         | 87747705     |                       | +           | 4083  |        |
| protein_coding         | 3'-phosphoadenosine 5'-phosphosulfate synthase 2 | [Source:HGNC | Symbol;Acc:HGNC:8604] |             |       |        |
| -                      |                                                  |              | 684                   | 531         |       | 643    |
| 298                    | 295                                              | 459          | 8.203617547           | 6.162282188 |       |        |
| 9.798022662            | 4.055542228                                      | 4.441094314  |                       | 5.227142307 |       |        |
| ENSG00000161681        | 154.2326642                                      | 246.9136477  |                       | 163.9113226 |       |        |
| 277.6395566            | 347.0135158                                      | 628.863864   |                       | 188.3525449 |       |        |
| 417.8389788            | -1.14981832                                      | 0.000453433  |                       | 0.006689561 |       | SHANK1 |
| 19                     | 50661827                                         | 50719450     |                       | -           | 7567  |        |
| protein_coding         | SH3 and multiple ankyrin repeat domains 1        | [Source:HGNC |                       |             |       |        |
| Symbol;Acc:HGNC:15474] | -                                                | 170          | 279                   | 141         | 268   | 304    |
| 729                    | 1.100154985                                      | 1.747056338  |                       | 1.159317056 |       |        |
| 1.967990981            | 2.469432786                                      | 4.479554373  |                       |             |       |        |
| ENSG00000154813        | 1212.994542                                      | 1322.182759  |                       | 1249.678524 |       |        |
| 1834.700204            | 1662.012102                                      | 1871.926728  |                       | 1261.618608 |       |        |
| 1789.546345            | -0.504510801                                     | 0.000455489  |                       | 0.006710249 |       | DPH3   |
| 3                      | 16257978                                         | 16264972     |                       | -           | 3562  |        |
| protein_coding         | diphthamide biosynthesis 3                       | [Source:HGNC |                       |             |       |        |
| Symbol;Acc:HGNC:27717] | -                                                | 1337         | 1494                  | 1075        | 1771  | 1456   |
| 2170                   | 18.38087475                                      | 19.87390105  |                       | 18.77679201 |       |        |
| 27.62718843            | 25.12550619                                      | 28.32675569  |                       |             |       |        |
| ENSG00000123130        | 524.3910583                                      | 614.1866363  |                       | 623.0955243 |       |        |
| 362.5889732            | 355.0039586                                      | 366.6215942  |                       | 587.2244063 |       |        |
| 361.404842             | 0.699676057                                      | 0.000455594  |                       | 0.006710249 |       | ACOT9  |
| X                      | 23702253                                         | 23766475     |                       | -           | 5046  |        |
| protein_coding         | acyl-CoA thioesterase 9                          | [Source:HGNC |                       |             |       |        |
| Symbol;Acc:HGNC:17152] | -                                                | 578          | 694                   | 536         | 350   | 311    |
| 425                    | 5.609307852                                      | 6.516864109  |                       | 6.608827102 |       |        |
| 3.854187529            | 3.788440782                                      | 3.916270687  |                       |             |       |        |
| ENSG00000055483        | 1811.780179                                      | 2062.038707  |                       | 1433.352204 |       |        |
| 2521.547317            | 2421.104168                                      | 3059.780694  |                       | 1769.05703  |       |        |
| 2667.477393            | -0.592122389                                     | 0.000458849  |                       | 0.006752568 |       | USP36  |
| 17                     | 78787381                                         | 78841441     |                       | -           | 9235  |        |
| protein_coding         | ubiquitin specific peptidase 36                  | [Source:HGNC |                       |             |       |        |
| Symbol;Acc:HGNC:20062] | -                                                | 1997         | 2330                  | 1233        | 2434  | 2121   |



|                                                     |                                            |             |                |        |
|-----------------------------------------------------|--------------------------------------------|-------------|----------------|--------|
| 3547                                                | 10.58936331                                | 11.95488663 | 8.306786022    |        |
| 14.64521385                                         | 14.11728326                                | 17.85892473 |                |        |
| ENSG00000130177                                     | 1673.878032                                | 1967.344225 | 1834.411824    |        |
| 2956.654084                                         | 2665.383419                                | 2279.954997 | 1825.21136     |        |
| 2633.9975                                           | -0.528908409                               | 0.000461926 | 0.006792194    | CDC16  |
| 13                                                  | 114234887                                  | 114272723   | + 3959         |        |
| protein_coding                                      | cell division cycle 16 [Source:HGNC        |             |                |        |
| Symbol;Acc:HGNC:1720]                               | -                                          | 1845 2223   | 1578 2854      | 2335   |
| 2643                                                | 22.8212565                                 | 26.60604993 | 24.79866739    |        |
| 40.05719279                                         | 36.25340004                                | 31.04149859 |                |        |
| ENSG00000125352                                     | 275.8042937                                | 405.3277801 | 442.9093186    |        |
| 475.5095392                                         | 743.1111801                                | 919.5732223 | 374.6804641    |        |
| 712.7313139                                         | -0.929424415                               | 0.000466229 | 0.006849777    |        |
| RNF113A X                                           | 119870475                                  | 119871827   | - 1353         |        |
| protein_coding                                      | ring finger protein 113A [Source:HGNC      |             |                |        |
| Symbol;Acc:HGNC:12974]                              | -                                          | 304 458     | 381 459        | 651    |
| 1066                                                | 11.00283171                                | 16.03962174 | 17.51999693    |        |
| 18.85067616                                         | 29.5753949                                 | 36.6345133  |                |        |
| ENSG00000176678                                     | 1462.488557                                | 1318.642778 | 2085.51002     |        |
| 947.9111728                                         | 1198.56642                                 | 778.1004188 | 1622.213785    |        |
| 974.8593371                                         | 0.734888559                                | 0.000466693 | 0.006850898    | FOX11  |
| 16                                                  | 86576368                                   | 86582160    | + 3742         |        |
| protein_coding                                      | forkhead box L1 [Source:HGNC               |             |                |        |
| Fork                                                | 1612 1490                                  | 1794 915    | 1050 902       |        |
| 21.09550556                                         | 18.86726399                                | 29.82809394 | 13.5871808     |        |
| 17.24776698                                         | 11.20814582                                |             |                |        |
| ENSG00000071539                                     | 1727.405839                                | 1381.477434 | 1490.314295    |        |
| 1142.67325                                          | 1034.191596                                | 862.6390453 | 1533.065856    |        |
| 1013.167964                                         | 0.598245962                                | 0.000472214 | 0.006926197    | TRIP13 |
| 5                                                   | 892643 919357                              | + 3560      | protein_coding |        |
| thyroid hormone receptor interactor 13 [Source:HGNC |                                            |             |                |        |
| Symbol;Acc:HGNC:12307]                              | -                                          | 1904 1561   | 1282 1103      | 906    |
| 1000                                                | 26.19061097                                | 20.77683285 | 22.40499616    |        |
| 17.21621026                                         | 15.64319863                                | 13.06113806 |                |        |
| ENSG00000112144                                     | 1418.940511                                | 1073.499121 | 1412.427355    |        |
| 833.9546384                                         | 956.570152                                 | 661.6441477 | 1301.622329    |        |
| 817.389646                                          | 0.67197499                                 | 0.000475694 | 0.006966274    | ICK    |
| 6                                                   | 53001279                                   | 53061802    | - 6259         |        |
| protein_coding                                      | intestinal cell kinase [Source:HGNC        |             |                |        |
| Symbol;Acc:HGNC:21219]                              | -                                          | 1564 1213   | 1215 805       | 838    |
| 767                                                 | 12.23659203                                | 9.182951491 | 12.07753134    |        |
| 7.146657553                                         | 8.22974592                                 | 5.697986691 |                |        |
| ENSG00000177674                                     | 908.1582169                                | 1192.973466 | 1048.567468    |        |
| 1363.334539                                         | 1627.767347                                | 1804.640883 | 1049.899717    |        |
| 1598.580923                                         | -0.606755441                               | 0.000475734 | 0.006966274    | AGTRAP |
| 1                                                   | 11736084                                   | 11754802    | + 2435         |        |
| protein_coding                                      | angiotensin II receptor associated protein |             |                |        |
| [Source:HGNC                                        | Symbol;Acc:HGNC:13539]                     | -           | 1001 1348      | 902    |
| 1316                                                | 1426 2092                                  | 20.130928   | 26.23115221    |        |
| 23.04700089                                         | 30.03094284                                | 35.99713362 | 39.94787965    |        |

|                                      |                                                                   |             |                |                  |
|--------------------------------------|-------------------------------------------------------------------|-------------|----------------|------------------|
| ENSG00000197563                      | 521.6693054                                                       | 487.6323294 | 624.258016     |                  |
| 331.5099184                          | 351.5794831                                                       | 205.3080928 | 544.5198836    |                  |
| 296.1324981                          | 0.88052207                                                        | 0.000476564 | 0.006972663    | PIGN             |
| 18                                   | 61905255                                                          | 62187118    | - 19003        |                  |
| protein_coding                       | phosphatidylinositol glycan anchor biosynthesis class             |             |                |                  |
| N [Source:HGNC Symbol;Acc:HGNC:8967] | -                                                                 | 575         | 551            | 537              |
| 320                                  | 308                                                               | 238         | 1.481748035    | 1.373902366      |
| 1.758162303                          | 0.935706947                                                       | 0.996267374 | 0.582352316    |                  |
| ENSG00000174720                      | 1062.390881                                                       | 869.9502355 | 833.506513     |                  |
| 636.0846559                          | 448.6062885                                                       | 613.3363612 | 921.9492099    |                  |
| 566.0091018                          | 0.703238704                                                       | 0.000480598 | 0.007025871    | LARP7            |
| 4                                    | 112636964                                                         | 112657592   | + 4083         |                  |
| protein_coding                       | La ribonucleoprotein domain family member 7                       |             |                |                  |
| [Source:HGNC Symbol;Acc:HGNC:24912]  | -                                                                 | 1171        | 983            | 717              |
| 614                                  | 393                                                               | 711         | 14.04449729    | 11.40776533      |
| 10.92563336                          | 8.356050094                                                       | 5.9164409   | 8.096945926    |                  |
| ENSG00000117461                      | 356.5496296                                                       | 298.2433666 | 272.0230461    |                  |
| 110.848629                           | 170.0822824                                                       | 176.8410043 | 308.9386808    |                  |
| 152.5906385                          | 1.017625512                                                       | 0.000483956 | 0.007069109    | PIK3R3           |
| 1                                    | 46040140                                                          | 46133036    | - 7410         |                  |
| protein_coding                       | phosphoinositide-3-kinase regulatory subunit 3                    |             |                |                  |
| [Source:HGNC Symbol;Acc:HGNC:8981]   | -                                                                 | 393         | 337            | 234              |
| 107                                  | 149                                                               | 205         | 2.597185837    | 2.154954643      |
| 1.964737326                          | 0.802375415                                                       | 1.235991319 | 1.286372275    |                  |
| ENSG00000244313                      | 1702.910063                                                       | 1994.779075 | 2328.470775    |                  |
| 2901.747754                          | 2919.936096                                                       | 2835.494542 | 2008.719971    |                  |
| 2885.726131                          | -0.523212351                                                      | 0.000484776 | 0.007075248    |                  |
| AC024293.1                           | 11                                                                | 46428653    | 46429150       | - 498            |
| processed_pseudogene                 | ribosomal protein S10 (RPS10)                                     |             |                |                  |
| pseudogene                           | -                                                                 | 1877        | 2254 2003 2801 | 2558 3287        |
| 184.571063                           | 214.4623249                                                       | 250.2409921 | 312.5329489    |                  |
| 315.7319687                          | 306.9031737                                                       |             |                |                  |
| ENSG00000137710                      | 3633.540119                                                       | 2589.495818 | 3379.363226    |                  |
| 2500.827947                          | 2050.119323                                                       | 1730.453925 | 3200.799721    |                  |
| 2093.800398                          | 0.612470657                                                       | 0.000490016 | 0.007145826    | RDX              |
| 11                                   | 109864295                                                         | 110296722   | - 8528         |                  |
| protein_coding                       | radixin [Source:HGNC Symbol;Acc:HGNC:9944]                        |             |                | -                |
| 4005                                 | 2926                                                              | 2907        | 2414 1796      | 2006 22.99767924 |
| 16.25749282                          | 21.2082428                                                        | 15.72903641 | 12.94513252    |                  |
| 10.93741662                          |                                                                   |             |                |                  |
| ENSG00000152620                      | 1381.743221                                                       | 1165.538617 | 1236.891115    |                  |
| 978.9902277                          | 761.3750494                                                       | 716.8530466 | 1261.390984    |                  |
| 819.0727746                          | 0.623369276                                                       | 0.000490921 | 0.007149889    | NADK2            |
| 5                                    | 36192592                                                          | 36242279    | - 4885         |                  |
| protein_coding                       | "NAD kinase 2, mitochondrial [Source:HGNC Symbol;Acc:HGNC:26404]" |             |                | -                |
| 831                                  | 15.26736255                                                       | 12.77460992 | 1064 945       | 667              |
| 10.74927773                          | 8.392833858                                                       | 7.909835905 | 13.55139195    |                  |
| ENSG00000260032                      | 7044.803751                                                       | 6369.310117 | 6139.118403    |                  |
| 8625.473689                          | 8522.377989                                                       | 8920.550367 | 6517.74409     |                  |

|                                                                   |               |             |             |        |
|-------------------------------------------------------------------|---------------|-------------|-------------|--------|
| 8689.467348                                                       | -0.414828036  | 0.000491103 | 0.007149889 | NORAD  |
| 20                                                                | 36045622      | 36050960    | - 5339      |        |
| lincRNA non-coding RNA activated by DNA damage [Source:HGNC       |               |             |             |        |
| Symbol;Acc:HGNC:44311]                                            | -             | 7765 7197   | 5281 8326   | 7466   |
| 10341                                                             | 71.22135349   | 63.87310413 | 61.54079372 |        |
| 86.65398295                                                       | 85.95584715   | 90.06035103 |             |        |
| ENSG00000198034                                                   | 23031.47302   | 24716.14464 | 28204.37241 |        |
| 33438.99108                                                       | 34962.75321   | 33278.02645 | 25317.33002 |        |
| 33893.25691                                                       | -0.420917844  | 0.000494134 | 0.007188101 | RPS4X  |
| X                                                                 | 72255679      | 72277300    | - 2982      |        |
| protein_coding ribosomal protein S4 X-linked [Source:HGNC         |               |             |             |        |
| Symbol;Acc:HGNC:10424]                                            | -             | 25386 27928 | 24262 32278 | 30629  |
| 38577                                                             | 416.8840892   | 443.7707133 | 506.2042719 |        |
| 601.4659161                                                       | 631.3534223   | 601.5224352 |             |        |
| ENSG00000026751                                                   | 0 0.884995153 | 0           | 15.53952742 |        |
| 17.12237742                                                       | 25.87917136   | 0.294998384 |             |        |
| 19.51369207                                                       | -5.802118976  | 0.000497701 | 0.00723405  | SLAMF7 |
| 1                                                                 | 160739057     | 160754821   | + 4833      |        |
| protein_coding SLAM family member 7 [Source:HGNC                  |               |             |             |        |
| Symbol;Acc:HGNC:21394]                                            | -             | 0 1         | 0 15        | 15     |
| 30                                                                | 0 0.009804143 | 0           | 0.172459256 |        |
| 0.190775159                                                       | 0.288626018   |             |             |        |
| ENSG00000179933                                                   | 931.7467421   | 1032.789344 | 932.3183032 |        |
| 1331.219516                                                       | 1360.658259   | 1505.305134 | 965.6181297 |        |
| 1399.06097                                                        | -0.534963269  | 0.000501783 | 0.007287382 |        |
| C14orf119                                                         | 14 23094765   | 23100462    | + 3676      |        |
| protein_coding chromosome 14 open reading frame 119               |               |             |             |        |
| [Source:HGNC Symbol;Acc:HGNC:20270]                               | -             | 1027 1167   |             | 802    |
| 1285                                                              | 1192 1745     | 13.68118213 | 15.04256145 |        |
| 13.57393334                                                       | 19.42404469   | 19.93187307 | 22.07247058 |        |
| ENSG00000119335                                                   | 9177.750772   | 8258.774769 | 8724.499832 |        |
| 7077.736757                                                       | 6352.402024   | 5915.115933 | 8720.341791 |        |
| 6448.418238                                                       | 0.435517167   | 0.000504517 | 0.007321084 | SET    |
| 9                                                                 | 128683424     | 128696400   | + 4355      |        |
| protein_coding SET nuclear proto-oncogene [Source:HGNC            |               |             |             |        |
| Symbol;Acc:HGNC:10760]                                            | -             | 10116 9332  | 7505 6832   | 5565   |
| 6857                                                              | 113.7494603   | 101.5343544 | 107.2184153 |        |
| 87.17094257                                                       | 78.54605359   | 73.21111282 |             |        |
| ENSG00000168389                                                   | 235.8852512   | 337.1831533 | 352.2349699 |        |
| 164.7189907                                                       | 171.2237742   | 124.2200225 | 308.4344581 |        |
| 153.3875958                                                       | 1.009170803   | 0.000513365 | 0.007443377 | MFSD2A |
| 1                                                                 | 39955112      | 39969968    | + 4007      |        |
| protein_coding major facilitator superfamily domain containing 2A |               |             |             |        |
| [Source:HGNC Symbol;Acc:HGNC:25897]                               | -             | 260 381     |             | 303    |
| 159                                                               | 150 144       | 3.177479001 | 4.505386715 |        |
| 4.704680471                                                       | 2.204904712   | 2.301014084 | 1.670991219 |        |
| ENSG00000138385                                                   | 2345.243747   | 2072.658649 | 2073.885103 |        |
| 1618.182789                                                       | 1335.545439   | 1586.393204 | 2163.929166 |        |
| 1513.373811                                                       | 0.515608907   | 0.000514993 | 0.007460861 | SSB    |
| 2                                                                 | 169791933     | 169812064   | + 5113      |        |

|                                         |                                                     |             |             |             |                |             |   |
|-----------------------------------------|-----------------------------------------------------|-------------|-------------|-------------|----------------|-------------|---|
| protein_coding                          | Sjogren syndrome antigen B [Source:HGNC             |             |             |             |                |             |   |
| Symbol;Acc:HGNC:11316]                  | -                                                   | 2585        | 2342        | 1784        | 1562           | 1170        |   |
| 1839                                    | 24.75787912                                         | 21.70388796 |             | 21.70830446 |                |             |   |
| 16.97529305                             | 14.06557301                                         | 16.72387661 |             |             |                |             |   |
| ENSG00000074695                         | 3090.09679                                          | 2379.751967 |             | 3683.936039 |                |             |   |
| 2249.087602                             | 2038.704405                                         | 1607.95918  |             | 3051.261598 |                |             |   |
| 1965.250396                             | 0.634672529                                         | 0.000516022 |             | 0.007469657 |                | LMAN1       |   |
| 18                                      | 59327823                                            | 59359962    |             | -           | 6767           |             |   |
| protein_coding                          | "lectin, mannose binding 1 [Source:HGNC             |             |             |             |                |             |   |
| Symbol;Acc:HGNC:6631]"                  | -                                                   | 3406        | 2689        | 3169        | 2171           | 1786        |   |
| 1864                                    | 24.64774264                                         | 18.82873168 |             | 29.13619998 |                |             |   |
| 17.82689435                             | 16.22305491                                         | 12.80798321 |             |             |                |             |   |
| ENSG00000182551                         | 1582.245685                                         | 1522.191663 |             | 1777.449733 |                |             |   |
| 1293.92465                              | 963.419103                                          | 985.1337897 |             | 1627.295694 |                |             |   |
| 1080.825848                             | 0.590071166                                         | 0.000517153 |             | 0.007479206 |                | ADI1        |   |
| 2                                       | 3497361                                             | 3519736     | -           | 5560        | protein_coding |             |   |
| acireductone dioxygenase 1 [Source:HGNC | Symbol;Acc:HGNC:30576]                              |             |             |             |                |             | - |
| 1744                                    | 1720                                                | 1529        | 1249        | 844         | 1142           | 15.36032386 |   |
| 14.65818154                             | 17.10958755                                         | 12.48244584 |             | 9.330716951 |                |             |   |
| 9.550416909                             |                                                     |             |             |             |                |             |   |
| ENSG00000145555                         | 4445.529733                                         | 3681.579837 |             | 4175.670006 |                |             |   |
| 3181.459248                             | 2445.075496                                         | 2998.533321 |             | 4100.926526 |                |             |   |
| 2875.022688                             | 0.512077957                                         | 0.000517552 |             | 0.007479206 |                | MY010       |   |
| 5                                       | 16661914                                            | 16936276    |             | -           | 13963          |             |   |
| protein_coding                          | myosin X [Source:HGNC Symbol;Acc:HGNC:7593]         |             |             |             |                |             | - |
| 4900                                    | 4160                                                | 3592        | 3071        | 2142        | 3476           | 17.18486107 |   |
| 14.1169551                              | 16.00532276                                         | 12.22117948 |             | 9.42948749  |                |             |   |
| 11.57529446                             |                                                     |             |             |             |                |             |   |
| ENSG00000102893                         | 665.922209                                          | 527.4571113 |             | 606.8206412 |                |             |   |
| 366.7328472                             | 402.9466153                                         | 314.8632515 |             | 600.0666538 |                |             |   |
| 361.514238                              | 0.732337442                                         | 0.000517951 |             | 0.007479206 |                | PHKB        |   |
| 16                                      | 47461123                                            | 47701523    |             | +           | 11822          |             |   |
| protein_coding                          | phosphorylase kinase regulatory subunit beta        |             |             |             |                |             |   |
| [Source:HGNC                            | Symbol;Acc:HGNC:8927]                               |             |             |             |                |             | - |
| 354                                     | 353                                                 | 365         | 3.040421455 | 2.388810754 |                | 522         |   |
| 2.747175436                             | 1.663889                                            | 1.835401619 |             | 1.435598274 |                |             |   |
| ENSG00000107614                         | 349.2916219                                         | 299.1283618 |             | 288.2979292 |                |             |   |
| 484.8332556                             | 523.9447491                                         | 550.3637109 |             | 312.2393043 |                |             |   |
| 519.7139052                             | -0.734479218                                        | 0.00052003  |             | 0.007503111 |                | TRDMT1      |   |
| 10                                      | 17142254                                            | 17202054    |             | -           | 10535          |             |   |
| protein_coding                          | tRNA aspartic acid methyltransferase 1 [Source:HGNC |             |             |             |                |             |   |
| Symbol;Acc:HGNC:2977]                   | -                                                   | 385         | 338         | 248         | 468            | 459         |   |
| 638                                     | 1.789595476                                         | 1.520227559 |             | 1.464616719 |                |             |   |
| 2.468444441                             | 2.678092084                                         | 2.81589954  |             |             |                |             |   |
| ENSG00000179950                         | 5098.750429                                         | 5832.118059 |             | 5471.848196 |                |             |   |
| 6332.875409                             | 8061.215291                                         | 9112.918874 |             | 5467.572228 |                |             |   |
| 7835.669858                             | -0.519245503                                        | 0.000521254 |             | 0.007514634 |                | PUF60       |   |
| 8                                       | 143816344                                           | 143829859   |             | -           | 5424           |             |   |
| protein_coding                          | poly(U) binding splicing factor 60 [Source:HGNC     |             |             |             |                |             |   |
| Symbol;Acc:HGNC:17042]                  | -                                                   | 5620        | 6590        | 4707        | 6113           | 7062        |   |

|                                                |                                                   |             |                |       |
|------------------------------------------------|---------------------------------------------------|-------------|----------------|-------|
| 10564                                          | 50.73939894                                       | 57.56946249 | 53.99224229    |       |
| 62.62485864                                    | 80.03047464                                       | 90.56069145 |                |       |
| ENSG00000160606                                | 174.1921855                                       | 247.7986429 | 156.9363727    |       |
| 363.6249417                                    | 299.070859                                        | 501.1932853 | 192.9757337    |       |
| 387.9630287                                    | -1.006903914                                      | 0.00052314  | 0.007535693    | TLCD1 |
| 17                                             | 28724348                                          | 28727935    | - 1311         |       |
| protein_coding                                 | TLC domain containing 1 [Source:HGNC              |             |                |       |
| Symbol;Acc:HGNC:25177]                         | -                                                 | 192 280     | 135 351        | 262   |
| 581                                            | 7.171784323                                       | 10.12002955 | 6.406752152    |       |
| 14.87703787                                    | 12.28417401                                       | 20.6065107  |                |       |
| ENSG00000123219                                | 662.2932052                                       | 577.901835  | 514.9838009    |       |
| 413.3514295                                    | 297.9293672                                       | 170.802531  | 585.0596137    |       |
| 294.0277759                                    | 0.99508458                                        | 0.000524344 | 0.007546878    | CENPK |
| 5                                              | 65517766                                          | 65563171    | - 4312         |       |
| protein_coding                                 | centromere protein K [Source:HGNC                 |             |                |       |
| Symbol;Acc:HGNC:29479]                         | -                                                 | 730 653     | 443 399        | 261   |
| 198                                            | 8.29034858                                        | 7.175643764 | 6.39192721     |       |
| 5.141693532                                    | 3.720566877                                       | 2.135096242 |                |       |
| ENSG00000204209                                | 2319.84072                                        | 2941.723889 | 2637.693554    |       |
| 3325.458869                                    | 3705.282474                                       | 4363.228291 | 2633.086054    |       |
| 3797.989878                                    | -0.52867282                                       | 0.000534021 | 0.007679915    | DAXX  |
| 6                                              | 33318558                                          | 33323016    | - 3084         |       |
| protein_coding                                 | death domain associated protein [Source:HGNC      |             |                |       |
| Symbol;Acc:HGNC:2681]                          | -                                                 | 2557 3324   | 2269 3210      | 3246  |
| 5058                                           | 40.60177706                                       | 51.07085005 | 45.77485456    |       |
| 57.83659363                                    | 64.69660723                                       | 76.25976695 |                |       |
| ENSG00000108592                                | 4397.445432                                       | 4944.46792  | 3819.947562    |       |
| 5506.17255                                     | 6154.923938                                       | 7068.464337 | 4387.286971    |       |
| 6243.186942                                    | -0.508823319                                      | 0.000534474 | 0.007680194    | FTSJ3 |
| 17                                             | 63819433                                          | 63830012    | - 5212         |       |
| protein_coding                                 | FtsJ RNA methyltransferase homolog 3 [Source:HGNC |             |                |       |
| Symbol;Acc:HGNC:17136]                         | -                                                 | 4847 5587   | 3286 5315      | 5392  |
| 8194                                           | 45.54044775                                       | 50.79263051 | 39.22563643    |       |
| 56.66447971                                    | 63.5905874                                        | 73.10087421 |                |       |
| ENSG00000128791                                | 1408.96075                                        | 1082.349072 | 1290.365731    |       |
| 819.4510795                                    | 913.1934625                                       | 774.6498627 | 1260.558518    |       |
| 835.7648016                                    | 0.593330424                                       | 0.000545301 | 0.00782679     | TWSG1 |
| 18                                             | 9334767 9402420 +                                 | 4435        | protein_coding |       |
| twisted gastrulation BMP signaling modulator 1 | [Source:HGNC                                      |             |                |       |
| Symbol;Acc:HGNC:12429]                         | -                                                 | 1553 1223   | 1110 791       | 800   |
| 898                                            | 17.1477252                                        | 13.06650003 | 15.57170621    |       |
| 9.910484873                                    | 11.0877576                                        | 9.414857057 |                |       |
| ENSG00000149823                                | 2359.759763                                       | 3165.627663 | 2750.455244    |       |
| 3132.768729                                    | 4845.632811                                       | 4755.729057 | 2758.614223    |       |
| 4244.710199                                    | -0.62172145                                       | 0.000545561 | 0.00782679     | VPS51 |
| 11                                             | 65089324                                          | 65111860    | + 4878         |       |
| protein_coding                                 | "VPS51, GARP complex subunit [Source:HGNC         |             |                |       |
| Symbol;Acc:HGNC:1172]"                         | -                                                 | 2601 3577   | 2366 3024      | 4245  |
| 5513                                           | 26.11122456                                       | 34.74590157 | 30.17725905    |       |
| 34.44704993                                    | 53.49131307                                       | 52.55054381 |                |       |

|                                              |                                                       |              |                |              |             |
|----------------------------------------------|-------------------------------------------------------|--------------|----------------|--------------|-------------|
| ENSG00000142621                              | 175.0994364                                           | 134.5192633  | 105.7867401    |              |             |
| 227.9130689                                  | 297.9293672                                           | 344.1929791  | 138.4684799    |              |             |
| 290.011805                                   | -1.064385252                                          | 0.000550391  | 0.007889681    | FHAD1        |             |
| 1                                            | 15247272                                              | 15400283     | + 12805        |              |             |
| protein_coding                               | forkhead associated phosphopeptide binding domain 1   |              |                |              |             |
| [Source:HGNC Symbol;Acc:HGNC:29408]          | -                                                     | 193          | 152            | 91           |             |
| 220                                          | 261                                                   | 399          | 0.738085052    | 0.56245845   |             |
| 0.442149009                                  | 0.954674103                                           | 1.252876562  | 1.448853022    |              |             |
| ENSG00000079931                              | 176.9139384                                           | 109.739399   | 120.8991316    |              |             |
| 68.37392066                                  | 26.25431205                                           | 38.81875704  | 135.850823     |              |             |
| 44.48232992                                  | 1.609973303                                           | 0.000555748  | 0.007957047    | MOXD1        |             |
| 6                                            | 132296055                                             | 132401545    | - 5293         |              |             |
| protein_coding                               | monooxygenase DBH like 1 [Source:HGNC                 |              |                |              |             |
| Symbol;Acc:HGNC:21063]                       | -                                                     | 195          | 124            | 104          | 66          |
| 45                                           | 1.8041033                                             | 1.110059434  | 1.22247023     | 23           |             |
| 0.692873713                                  | 0.26709964                                            | 0.395313493  |                |              |             |
| ENSG00000174173                              | 1351.803939                                           | 1768.220316  | 1343.840347    |              |             |
| 2300.886027                                  | 1930.262681                                           | 2403.31238   | 1487.954868    |              |             |
| 2211.48703                                   | -0.571531419                                          | 0.000555599  | 0.007957047    |              |             |
| TRMT10C                                      | 3                                                     | 101561862    | 101566446      | + 1888       |             |
| protein_coding                               | "tRNA methyltransferase 10C, mitochondrial RNase P    |              |                |              |             |
| subunit [Source:HGNC Symbol;Acc:HGNC:26022]" | -                                                     | 1490         | 1998           |              |             |
| 1156                                         | 2221                                                  | 1691         | 2786           | 38.6467486   | 50.14411084 |
| 38.09453623                                  | 65.36700882                                           | 55.05401259  | 68.61358955    |              |             |
| ENSG00000165704                              | 2205.527098                                           | 1966.45923   | 2170.37191     |              |             |
| 1418.24087                                   | 1546.721427                                           | 1569.140423  | 2114.119413    |              |             |
| 1511.367573                                  | 0.483973579                                           | 0.000558804  | 0.007990858    | HPRT1        |             |
| X                                            | 134460153                                             | 134520513    | + 1624         |              |             |
| protein_coding                               | hypoxanthine phosphoribosyltransferase 1 [Source:HGNC |              |                |              |             |
| Symbol;Acc:HGNC:5157]                        | -                                                     | 2431         | 2222           | 1867         | 1369        |
| 1819                                         | 73.30399054                                           | 64.83126124  | 71.52619785    | 1355         |             |
| 46.84135686                                  | 51.28621286                                           | 52.08080547  |                |              |             |
| ENSG00000169764                              | 1237.490318                                           | 1123.943844  | 1236.891115    |              |             |
| 972.7744167                                  | 607.2736526                                           | 640.9408106  | 1199.441759    |              |             |
| 740.3296266                                  | 0.696094411                                           | 0.000559625  | 0.007994318    | UGP2         |             |
| 2                                            | 63840940                                              | 63891562     | + 6501         |              |             |
| protein_coding                               | UDP-glucose pyrophosphorylase 2 [Source:HGNC          |              |                |              |             |
| Symbol;Acc:HGNC:12527]                       | -                                                     | 1364         | 1270           | 1064         | 939         |
| 743                                          | 10.27455184                                           | 9.256567997  | 10.18282567    | 532          |             |
| 8.025968851                                  | 5.030125567                                           | 5.314221668  |                |              |             |
| ENSG00000254995                              | 16.33051739                                           | 14.15992245  | 13.9498998     | 0            |             |
| 0                                            | 0                                                     | 14.81344655  | 0              | 6.322237469  |             |
| 0.000560034                                  | 0.007994318                                           | STX16-NPEPL1 | 20             | 58651434     |             |
| 58715410                                     | +                                                     | 3859         | protein_coding | STX16-NPEPL1 |             |
| readthrough (NMD candidate)                  | [Source:HGNC Symbol;Acc:HGNC:41993] -                 |              |                |              |             |
| 18                                           | 16                                                    | 12           | 0              | 0            | 0.228415941 |
| 0.196458871                                  | 0.193469859                                           | 0            | 0              | 0            |             |
| ENSG00000238228                              | 26.31027801                                           | 45.13475281  | 32.5497662     |              |             |
| 148.1434948                                  | 107.3002318                                           | 75.91223598  | 34.66493234    |              |             |
| 110.4519875                                  | -1.668727624                                          | 0.000560402  | 0.007994318    | OR7E7P       |             |

|                                     |                                                      |             |             |             |             |
|-------------------------------------|------------------------------------------------------|-------------|-------------|-------------|-------------|
| 7                                   | 97946987                                             | 97947998    | -           | 1012        |             |
| unprocessed_pseudogene              | olfactory receptor family 7 subfamily E member       |             |             |             |             |
| 7                                   | pseudogene [Source:HGNC Symbol;Acc:HGNC:8457]        |             |             |             | - 29 51     |
| 28                                  | 143                                                  | 94          | 88          | 1.403285924 | 2.387899829 |
|                                     | 1.721410174                                          | 7.851769985 | 5.709455617 | 4.043274043 |             |
| ENSG00000158710                     | 30910.04041                                          | 38197.2758  | 48763.03724 |             |             |
| 25927.18352                         | 29723.30571                                          | 24875.92215 | 39290.11782 |             |             |
| 26842.13713                         | 0.549648674                                          | 0.000562391 | 0.008016224 |             | TAGLN2      |
| 1                                   | 159918107                                            | 159925732   | -           | 2487        |             |
| protein_coding                      | transgelin 2 [Source:HGNC Symbol;Acc:HGNC:11554]     |             |             |             |             |
| -                                   | 34070                                                | 43161       | 41947       | 25027       | 26039 28837 |
| 670.8493941                         | 822.3224631                                          | 1049.37803  | 559.1715308 |             |             |
| 643.5701263                         | 539.1446628                                          |             |             |             |             |
| ENSG00000134717                     | 2262.683909                                          | 2197.442965 | 2254.071309 |             |             |
| 2891.388069                         | 3311.467794                                          | 2976.967345 | 2238.066061 |             |             |
| 3059.941069                         | -0.451119016                                         | 0.000565042 | 0.008047526 |             | BTF3L4      |
| 1                                   | 52056125                                             | 52090716    | +           | 6022        |             |
| protein_coding                      | basic transcription factor 3 like 4 [Source:HGNC     |             |             |             |             |
| Symbol;Acc:HGNC:30547]              | -                                                    | 2494        | 2483        | 1939        | 2791 2901   |
| 3451                                | 20.28076728                                          | 19.53720391 | 20.03290375 |             |             |
| 25.75319575                         | 29.61108615                                          | 26.6461965  |             |             |             |
| ENSG00000115159                     | 1997.766627                                          | 1354.927579 | 1875.099031 |             |             |
| 1299.104493                         | 958.8531357                                          | 1079.161446 | 1742.597746 |             |             |
| 1112.373025                         | 0.647175413                                          | 0.000566014 | 0.008054884 |             | GPD2        |
| 2                                   | 156435290                                            | 156613735   | +           | 7155        |             |
| protein_coding                      | glycerol-3-phosphate dehydrogenase 2 [Source:HGNC    |             |             |             |             |
| Symbol;Acc:HGNC:4456]               | -                                                    | 2202        | 1531        | 1613        | 1254 840    |
| 1251                                | 15.07080186                                          | 10.13892694 | 14.02592705 |             |             |
| 9.738676554                         | 7.216340353                                          | 8.129778061 |             |             |             |
| ENSG00000101639                     | 840.1143945                                          | 641.621486  | 741.6696726 |             |             |
| 567.7107352                         | 366.4188768                                          | 315.7258906 | 741.1351844 |             |             |
| 416.6185009                         | 0.831763935                                          | 0.000575833 | 0.008188031 |             | CEP192      |
| 18                                  | 12991362                                             | 13125052    | +           | 9901        |             |
| protein_coding                      | centrosomal protein 192 [Source:HGNC                 |             |             |             |             |
| Symbol;Acc:HGNC:25515]              | -                                                    | 926         | 725         | 638         | 548 321     |
| 366                                 | 4.57994866                                           | 3.469647757 | 4.009114546 |             |             |
| 3.075484493                         | 1.992844132                                          | 1.718830467 |             |             |             |
| ENSG00000090520                     | 1534.161383                                          | 1362.007541 | 1428.702238 |             |             |
| 1222.442824                         | 622.1130464                                          | 603.8473317 | 1441.623721 |             |             |
| 816.1344007                         | 0.82111372                                           | 0.000578075 | 0.008213303 |             |             |
| DNAJB11                             | 3                                                    | 186567403   | 186585800   | +           | 5731        |
| protein_coding                      | DnaJ heat shock protein family (Hsp40) member B11    |             |             |             |             |
| [Source:HGNC Symbol;Acc:HGNC:14889] | -                                                    |             | 1691        | 1539        | 1229        |
| 1180                                | 545                                                  | 700         | 14.44913613 | 12.72432204 |             |
| 13.34222687                         | 11.44099096                                          | 5.845389485 | 5.679350209 |             |             |
| ENSG00000113810                     | 6316.281225                                          | 3633.790099 | 4498.842685 |             |             |
| 2621.000292                         | 1430.289261                                          | 1274.11787  | 4816.30467  |             |             |
| 1775.135808                         | 1.440065872                                          | 0.000582672 | 0.008271976 |             | SMC4        |
| 3                                   | 160399274                                            | 160434962   | +           | 8457        |             |
| protein_coding                      | structural maintenance of chromosomes 4 [Source:HGNC |             |             |             |             |

|                                                  |                                              |             |             |             |             |             |
|--------------------------------------------------|----------------------------------------------|-------------|-------------|-------------|-------------|-------------|
| Symbol;Acc:HGNC:14013]                           | -                                            | 6962        | 4106        | 3870        | 2530        | 1253        |
| 1477                                             | 40.31311634                                  | 23.00536114 |             | 28.47091869 |             |             |
| 16.6232614                                       | 9.10714184                                   | 8.120732088 |             |             |             |             |
| ENSG00000121005                                  | 215.0184789                                  | 140.7142293 |             | 161.5863393 |             |             |
| 92.20119605                                      | 62.78205055                                  | 51.75834272 |             | 172.4396825 |             |             |
| 68.9138631                                       | 1.325717864                                  | 0.000585329 |             | 0.008303039 |             |             |
| CRISPLD1                                         | 8                                            | 74984515    | 75034558    | +           |             | 4543        |
| protein_coding                                   | cysteine rich secretory protein LCCL domain  |             |             |             |             |             |
| containing 1 [Source:HGNC Symbol;Acc:HGNC:18206] | -                                            |             |             |             |             | 237         |
| 159                                              | 139                                          | 89          | 55          | 60          | 2.554666969 |             |
| 1.658367692                                      | 1.903614087                                  | 1.0885774   |             |             | 0.744161698 |             |
| 0.614100614                                      |                                              |             |             |             |             |             |
| ENSG00000204291                                  | 56.24955989                                  | 100.0044523 |             | 131.3615564 |             |             |
| 40.4027713                                       | 17.12237742                                  | 9.489029498 |             | 95.87185621 |             |             |
| 22.33805941                                      | 2.105585972                                  | 0.000588548 |             | 0.008340175 |             |             |
| COL15A1 9                                        | 98943179                                     | 99070792    |             | +           | 6653        |             |
| protein_coding                                   | collagen type XV alpha 1 chain [Source:HGNC  |             |             |             |             |             |
| Symbol;Acc:HGNC:2192]                            | -                                            | 62          | 113         | 113         | 39          | 15          |
| 11                                               | 0.456355038                                  | 0.804798875 |             | 1.056739075 |             |             |
| 0.325731026                                      | 0.138586554                                  | 0.076878726 |             |             |             |             |
| ENSG00000276180                                  | 106.148363                                   | 120.3593408 |             | 112.76169   |             |             |
| 269.3518087                                      | 220.3079228                                  | 205.3080928 |             | 113.089798  |             |             |
| 231.6559414                                      | -1.03389022                                  | 0.00058889  |             | 0.008340175 |             |             |
| HIST1H4I                                         | 6                                            | 27138588    | 27139881    | +           |             | 1294        |
| protein_coding                                   | histone cluster 1 H4 family member i         |             |             |             |             |             |
| [Source:HGNC Symbol;Acc:HGNC:4793]               | -                                            |             |             | 117         | 136         | 97          |
| 260                                              | 193                                          | 238         | 4.427721221 | 4.980019839 |             |             |
| 4.663847105                                      | 11.16480431                                  | 9.16791109  |             | 8.552118282 |             |             |
| ENSG00000080845                                  | 1245.655576                                  | 1174.388568 |             | 1585.63861  |             |             |
| 999.7095976                                      | 826.4400836                                  | 755.6718037 |             | 1335.227585 |             |             |
| 860.6071616                                      | 0.633296705                                  | 0.000589631 |             | 0.008343986 |             | DLGAP4      |
| 20                                               | 36306336                                     | 36528637    |             | +           | 8789        |             |
| protein_coding                                   | DLG associated protein 4 [Source:HGNC        |             |             |             |             |             |
| Symbol;Acc:HGNC:24476]                           | -                                            | 1373        | 1327        | 1364        | 965         | 724         |
| 876                                              | 7.649970428                                  | 7.154147653 |             | 9.65565528  |             |             |
| 6.100984091                                      | 5.063449255                                  | 4.634422882 |             |             |             |             |
| ENSG00000202111                                  | 30.84653284                                  | 56.6396898  |             | 37.1997328  |             |             |
| 90.12925906                                      | 94.74382174                                  | 216.5224004 |             | 41.56198515 |             |             |
| 133.7984937                                      | -1.687512232                                 | 0.000595333 |             | 0.008417946 |             |             |
| VTRNA1-2                                         | 5                                            | 140718925   | 140719013   | +           |             | 89          |
| misc_RNA                                         | vault RNA 1-2 [Source:HGNC                   |             |             |             |             |             |
| Symbol;Acc:HGNC:12655]                           | -                                            | 34          | 64          | 32          | 87          | 83          |
| 251                                              | 18.70757926                                  | 34.07347348 |             | 22.37004297 |             |             |
| 54.31768968                                      | 57.32386254                                  | 131.1338261 |             |             |             |             |
| ENSG00000138119                                  | 3404.912875                                  | 2566.485944 |             | 3335.188544 |             |             |
| 2659.331126                                      | 1511.335181                                  | 1361.244413 |             | 3102.195788 |             |             |
| 1843.97024                                       | 0.75057001                                   | 0.000596306 |             | 0.008422294 |             | MYOF        |
| 10                                               | 93306429                                     | 93482317    |             | -           | 8473        |             |
| protein_coding                                   | myoferlin [Source:HGNC Symbol;Acc:HGNC:3656] |             |             |             |             | -           |
| 3753                                             | 2900                                         | 2869        | 2567        | 1324        | 1578        | 21.69052389 |



|                        |                                                                       |             |             |             |                |
|------------------------|-----------------------------------------------------------------------|-------------|-------------|-------------|----------------|
|                        | 16.21762419                                                           | 21.0668784  | 16.83451876 | 9.605017023 |                |
|                        | 8.659659397                                                           |             |             |             |                |
| ENSG00000140465        | 3.629003864                                                           | 7.964956378 | 0           | 26.93518087 |                |
|                        | 46.80116496                                                           | 44.85723035 | 3.864653414 | 39.53119206 |                |
|                        | -3.313219831                                                          | 0.000596593 | 0.008422294 | CYP1A1      | 15             |
|                        | 74719542                                                              | 74725610    | -           | 3435        | protein_coding |
|                        | cytochrome P450 family 1 subfamily A member 1 [Source:HGNC            |             |             |             |                |
| Symbol;Acc:HGNC:2595]  | -                                                                     | 4           | 9           | 0           | 26 41          |
|                        | 52                                                                    | 0.057024559 | 0.124148709 | 0           | 0.420589717    |
|                        | 0.733676275                                                           | 0.703894579 |             |             |                |
| ENSG00000106803        | 686.7889812                                                           | 858.4452985 | 891.6310955 |             |                |
| 454.7901693            | 438.332862                                                            | 598.6714974 | 812.2884584 |             |                |
| 497.2648429            | 0.706015048                                                           | 0.00060186  | 0.008481317 | SEC61B      |                |
|                        | 9                                                                     | 99222064    | 99230615    | +           | 1190           |
|                        | protein_coding Sec61 translocon beta subunit [Source:HGNC             |             |             |             |                |
| Symbol;Acc:HGNC:16993] | -                                                                     | 757         | 970         | 767         | 439 384        |
|                        | 694                                                                   | 31.15140231 | 38.62346331 | 40.10100428 |                |
| 20.49885496            | 19.83497344                                                           | 27.11711777 |             |             |                |
| ENSG00000151640        | 420.0571972                                                           | 434.5326202 | 476.6215765 |             |                |
| 562.5308927            | 738.5452128                                                           | 975.6447602 | 443.7371313 |             |                |
| 758.9069553            | -0.77569211                                                           | 0.000602112 | 0.008481317 | DPYSL4      |                |
|                        | 10                                                                    | 132186900   | 132205776   | +           | 3176           |
|                        | protein_coding dihydropyrimidinase like 4 [Source:HGNC                |             |             |             |                |
| Symbol;Acc:HGNC:3016]  | -                                                                     | 463         | 491         | 410         | 543 647        |
|                        | 1131                                                                  | 7.13886519  | 7.325334135 | 8.031750511 |                |
| 9.500170059            | 12.52192641                                                           | 16.5582002  |             |             |                |
| ENSG00000166794        | 2074.882959                                                           | 2445.241608 | 3195.689546 |             |                |
| 1760.110473            | 1860.63168                                                            | 1266.354118 | 2571.938038 |             |                |
| 1629.03209             | 0.658989395                                                           | 0.000602212 | 0.008481317 | PPIB        |                |
|                        | 15                                                                    | 64155812    | 64163205    | -           | 1911           |
|                        | protein_coding peptidylprolyl isomerase B [Source:HGNC                |             |             |             |                |
| Symbol;Acc:HGNC:9255]  | -                                                                     | 2287        | 2763        | 2749        | 1699 1630      |
|                        | 1468                                                                  | 58.60493129 | 68.50884389 | 89.49955983 |                |
| 49.40202322            | 52.42932634                                                           | 35.71876107 |             |             |                |
| ENSG00000178252        | 4136.157154                                                           | 4349.751178 | 3761.822979 |             |                |
| 4807.929785            | 6028.218345                                                           | 6419.759775 | 4082.577104 |             |                |
| 5751.969301            | -0.494491903                                                          | 0.000606129 | 0.008529681 | WDR6        |                |
|                        | 3                                                                     | 49007062    | 49015953    | +           | 5304           |
|                        | protein_coding WD repeat domain 6 [Source:HGNC Symbol;Acc:HGNC:12758] |             |             |             |                |
|                        | -                                                                     | 4559        | 4915        | 3236        | 4641 5281 7442 |
| 42.09153465            | 43.90828228                                                           | 37.9587449  | 48.62057568 |             |                |
| 61.20121052            | 65.24048312                                                           |             |             |             |                |
| ENSG00000050344        | 200.5024635                                                           | 232.7537253 | 176.6987308 |             |                |
| 104.632818             | 90.17785443                                                           | 90.57709975 | 203.3183065 |             |                |
| 95.12925739            | 1.097192652                                                           | 0.000611839 | 0.008603192 | NFE2L3      |                |
|                        | 7                                                                     | 26152240    | 26187125    | +           | 4249           |
|                        | protein_coding "nuclear factor, erythroid 2 like 3 [Source:HGNC       |             |             |             |                |
| Symbol;Acc:HGNC:7783]" | TF_bZIP                                                               | 221         | 263         | 152         | 101 79         |
|                        | 105                                                                   | 2.547030973 | 2.932887862 | 2.225685023 |                |
| 1.320829276            | 1.142846021                                                           | 1.149035869 |             |             |                |

|                                       |                                                       |           |             |           |             |       |        |
|---------------------------------------|-------------------------------------------------------|-----------|-------------|-----------|-------------|-------|--------|
| ENSG00000089157                       | 30715.8887                                            |           | 37099.88181 |           | 42573.93169 |       |        |
| 44408.86147                           | 57907.88044                                           |           | 55167.49222 |           | 36796.5674  |       |        |
| 52494.74471                           | -0.5126331                                            |           | 0.000612577 |           | 0.00860673  |       | RPLP0  |
| 12                                    | 120196686                                             |           | 120201235   |           | -           | 4001  |        |
| protein_coding                        | ribosomal protein lateral stalk subunit P0            |           |             |           |             |       |        |
| [Source:HGNC Symbol;Acc:HGNC:10371]   |                                                       |           | -           |           | 33856       | 41921 | 36623  |
| 42867                                 | 50730                                                 | 63952     | 414.3771301 |           | 496.4660135 |       |        |
| 569.4980118                           | 595.3420838                                           |           | 779.3699758 |           | 743.2186475 |       |        |
| ENSG00000122203                       | 1710.168071                                           |           | 1910.704536 |           | 1951.82348  |       |        |
| 2264.62713                            | 2691.637731                                           |           | 3101.187368 |           | 1857.565362 |       |        |
| 2685.817409                           | -0.53240491                                           |           | 0.000617185 |           | 0.008664588 |       |        |
| KIAA1191                              | 5                                                     | 176346061 |             | 176361968 |             | -     | 3973   |
| protein_coding                        | KIAA1191 [Source:HGNC Symbol;Acc:HGNC:29209]          |           |             |           |             |       |        |
| -                                     | 1885                                                  | 2159      | 1679        | 2186      | 2358        | 3595  |        |
| 23.23386561                           | 25.74900894                                           |           | 26.29292955 |           | 30.57339281 |       |        |
| 36.48149237                           | 42.07376218                                           |           |             |           |             |       |        |
| ENSG00000137509                       | 1232.046812                                           |           | 1315.102798 |           | 1737.925017 |       |        |
| 1102.270479                           | 784.204886                                            |           | 800.529034  |           | 1428.358209 |       |        |
| 895.6681328                           | 0.67273092                                            |           | 0.000619188 |           | 0.008685815 |       | PRCP   |
| 11                                    | 82823502                                              |           | 82970584    |           | -           | 12798 |        |
| protein_coding                        | prolylcarboxypeptidase [Source:HGNC                   |           |             |           |             |       |        |
| Symbol;Acc:HGNC:9344]                 |                                                       |           | -           | 1358      | 1486        | 1495  | 1064   |
| 928                                   | 5.196205852                                           |           | 5.501779039 |           | 7.267849633 |       | 687    |
| 4.619676514                           | 3.299605292                                           |           | 3.371606547 |           |             |       |        |
| ENSG00000087111                       | 1233.861314                                           |           | 1493.871818 |           | 1531.001503 |       |        |
| 969.6665112                           | 954.2871684                                           |           | 996.3480973 |           | 1419.578212 |       |        |
| 973.4339256                           | 0.54378817                                            |           | 0.000620612 |           | 0.008698893 |       | PIGS   |
| 17                                    | 28553383                                              |           | 28571872    |           | -           | 5990  |        |
| protein_coding                        | phosphatidylinositol glycan anchor biosynthesis class |           |             |           |             |       |        |
| S [Source:HGNC Symbol;Acc:HGNC:14937] |                                                       |           | -           |           | 1360        | 1688  | 1317   |
| 936                                   | 836                                                   | 1155      | 11.11836096 |           | 13.35279129 |       |        |
| 13.67936063                           | 8.682825439                                           |           | 8.578805376 |           | 8.965740815 |       |        |
| ENSG00000141458                       | 4083.536598                                           |           | 3530.245666 |           | 3230.564295 |       |        |
| 6587.723659                           | 4774.860317                                           |           | 4613.393614 |           | 3614.782186 |       |        |
| 5325.325863                           | -0.558719725                                          |           | 0.000622173 |           | 0.008713872 |       | NPC1   |
| 18                                    | 23506184                                              |           | 23586898    |           | -           | 10102 |        |
| protein_coding                        | NPC intracellular cholesterol transporter 1           |           |             |           |             |       |        |
| [Source:HGNC Symbol;Acc:HGNC:7897]    |                                                       |           | -           |           | 4501        | 3989  | 2779   |
| 6359                                  | 4183                                                  | 5348      | 21.81877342 |           | 18.71040176 |       |        |
| 17.11543846                           | 34.97788169                                           |           | 25.45234847 |           | 24.61586223 |       |        |
| ENSG00000168495                       | 2093.027979                                           |           | 2568.255934 |           | 2318.00835  |       |        |
| 3023.992037                           | 3377.67432                                            |           | 3294.418514 |           | 2326.430754 |       |        |
| 3232.02829                            | -0.474258484                                          |           | 0.000623815 |           | 0.008729952 |       | POLR3D |
| 8                                     | 22245104                                              |           | 22254600    |           | +           | 5611  |        |
| protein_coding                        | RNA polymerase III subunit D [Source:HGNC             |           |             |           |             |       |        |
| Symbol;Acc:HGNC:1080]                 |                                                       |           | -           | 2307      | 2902        | 1994  | 2919   |
| 3819                                  | 20.13427562                                           |           | 24.50662923 |           | 22.11015219 |       | 2959   |
| 28.90718953                           | 32.41545013                                           |           | 31.64757282 |           |             |       |        |
| ENSG00000136938                       | 3334.1473                                             |           | 3466.526015 |           | 3644.411322 |       |        |
| 2771.215724                           | 2429.09461                                            |           | 2461.971835 |           | 3481.694879 |       |        |

|                                                                                  |                                                                                                                                         |             |                |                |
|----------------------------------------------------------------------------------|-----------------------------------------------------------------------------------------------------------------------------------------|-------------|----------------|----------------|
| 2554.094056                                                                      | 0.4468601                                                                                                                               | 0.000629407 | 0.008801254    | ANP32B         |
| 9                                                                                | 97983361                                                                                                                                | 98015943    | + 1850         |                |
| protein_coding                                                                   | acidic nuclear phosphoprotein 32 family member B                                                                                        |             |                |                |
| [Source:HGNC Symbol;Acc:HGNC:16677]                                              | -                                                                                                                                       | 3675        | 3917           | 3135           |
| 2675                                                                             | 2128 2854                                                                                                                               | 97.27792507 | 100.3247957    |                |
| 105.432053                                                                       | 80.34597062                                                                                                                             | 70.70453256 | 71.73205264    |                |
| ENSG00000128050                                                                  | 7692.580941                                                                                                                             | 6876.41234  | 7242.322979    |                |
| 6189.911757                                                                      | 4748.606005                                                                                                                             | 4423.613024 | 7270.438753    |                |
| 5120.710262                                                                      | 0.505792302                                                                                                                             | 0.000631639 | 0.008825482    | PAICS          |
| 4                                                                                | 56435741                                                                                                                                | 56464579    | + 7517         |                |
| protein_coding                                                                   | phosphoribosylaminoimidazole carboxylase and phosphoribosylaminoimidazolesuccinocarboxamide synthase [Source:HGNC Symbol;Acc:HGNC:8587] | -           | 8479 7770      | 6230 5975 4160 |
| 5128                                                                             | 55.23683277                                                                                                                             | 48.97821005 | 51.56444444    |                |
| 44.16776293                                                                      | 34.01701023                                                                                                                             | 31.72009537 |                |                |
| ENSG00000007376                                                                  | 1405.331746                                                                                                                             | 1924.864458 | 1578.663661    |                |
| 1657.549592                                                                      | 3054.632132                                                                                                                             | 3833.567917 | 1636.286622    |                |
| 2848.583214                                                                      | -0.799947996                                                                                                                            | 0.000636008 | 0.008879518    | RPUSD1         |
| 16                                                                               | 784974 788397                                                                                                                           | - 2769      | protein_coding | RNA            |
| pseudouridylate synthase domain containing 1 [Source:HGNC Symbol;Acc:HGNC:14173] | -                                                                                                                                       | 1549 2175   | 1358 1600      | 2676           |
| 4444                                                                             | 27.39410686                                                                                                                             | 37.21883255 | 30.5129123     |                |
| 32.10769069                                                                      | 59.40329203                                                                                                                             | 74.62461656 |                |                |
| ENSG00000260442                                                                  | 15.42326642                                                                                                                             | 71.6846074  | 37.1997328     | 0              |
| 0                                                                                | 7.763751407                                                                                                                             | 41.43586887 | 2.587917136    |                |
| 3.931104807                                                                      | 0.000639224                                                                                                                             | 0.008917381 | ATP2A1-AS1     | 16             |
| 28878957                                                                         | 28879920                                                                                                                                | -           | 583            | antisense      |
| ATP2A1 antisense RNA 1 [Source:HGNC Symbol;Acc:HGNC:51370]                       | -                                                                                                                                       | 32 0        | 0 9            |                |
| 1.427937011                                                                      | 6.583288762                                                                                                                             | 3.41498083  | 0 0            |                |
| 0.71780251                                                                       |                                                                                                                                         |             |                |                |
| ENSG00000133316                                                                  | 1073.277893                                                                                                                             | 1477.941906 | 1245.028557    |                |
| 1424.45668                                                                       | 2139.155686                                                                                                                             | 2746.64272  | 1265.416118    |                |
| 2103.418362                                                                      | -0.733388802                                                                                                                            | 0.000642935 | 0.008956574    | WDR74          |
| 11                                                                               | 62832342                                                                                                                                | 62841809    | - 4247         |                |
| protein_coding                                                                   | WD repeat domain 74 [Source:HGNC Symbol;Acc:HGNC:25529]                                                                                 | -           | 1183 1670      | 1071 1375 1874 |
| 3184                                                                             | 13.64052755                                                                                                                             | 18.63205043 | 15.68967893    |                |
| 17.99005457                                                                      | 27.12281026                                                                                                                             | 34.85955318 |                |                |
| ENSG00000108100                                                                  | 2033.149415                                                                                                                             | 1953.184303 | 2078.53507     |                |
| 2386.871412                                                                      | 3205.309054                                                                                                                             | 3078.758753 | 2021.622929    |                |
| 2890.313073                                                                      | -0.515824604                                                                                                                            | 0.000643046 | 0.008956574    | CCNY           |
| 10                                                                               | 35247025                                                                                                                                | 35572669    | + 5743         |                |
| protein_coding                                                                   | cyclin Y [Source:HGNC Symbol;Acc:HGNC:23354]                                                                                            | -           |                |                |
| 2241                                                                             | 2207 1788                                                                                                                               | 2304 2808   | 3569           | 19.10872559    |
| 18.20916192                                                                      | 19.37026422                                                                                                                             | 22.29234225 | 30.05423289    |                |
| 28.89606794                                                                      |                                                                                                                                         |             |                |                |
| ENSG00000089737                                                                  | 3135.459338                                                                                                                             | 3160.317692 | 3496.774883    |                |
| 4069.284248                                                                      | 4625.324888                                                                                                                             | 4586.651804 | 3264.183971    |                |
| 4427.08698                                                                       | -0.439880552                                                                                                                            | 0.000648468 | 0.009024982    | DDX24          |

|                                                 |                                               |             |             |             |                    |
|-------------------------------------------------|-----------------------------------------------|-------------|-------------|-------------|--------------------|
| 14                                              | 94048291                                      | 94081245    | -           | 8636        |                    |
| protein_coding                                  | DEAD-box helicase 24 [Source:HGNC             |             |             |             |                    |
| Symbol;Acc:HGNC:13266]                          | -                                             | 3456        | 3571        | 3008        | 3928 4052          |
| 5317                                            | 19.59700862                                   | 19.59312266 |             | 21.67065533 |                    |
| 25.27382006                                     | 28.8405915                                    | 28.62760688 |             |             |                    |
| ENSG00000182919                                 | 283.9695524                                   | 272.5785072 |             | 318.5227121 |                    |
| 517.9842475                                     | 534.2181756                                   | 422.6931322 |             | 291.6902572 |                    |
| 491.6318517                                     | -0.753329293                                  | 0.000649162 |             | 0.009027538 |                    |
| C11orf54                                        | 11                                            | 93741591    | 93764749    | +           | 6269               |
| protein_coding                                  | chromosome 11 open reading frame 54           |             |             |             |                    |
| [Source:HGNC Symbol;Acc:HGNC:30204]             | -                                             |             | 313         | 308         | 274                |
| 500                                             | 468                                           | 490         | 2.444976849 | 2.327978084 |                    |
| 2.719312629                                     | 4.431836992                                   | 4.588755768 |             | 3.634367401 |                    |
| ENSG00000173083                                 | 137.9021468                                   | 148.6791857 |             | 129.0365731 |                    |
| 73.55376314                                     | 39.95221399                                   | 42.26931322 |             | 138.5393019 |                    |
| 51.92509678                                     | 1.41699005                                    | 0.000653585 |             | 0.00908191  | HPSE               |
| 4                                               | 83292461                                      | 83335153    | -           | 4721        |                    |
| protein_coding                                  | heparanase [Source:HGNC Symbol;Acc:HGNC:5164] |             |             |             | -                  |
| 152                                             | 168                                           | 111         | 71          | 35          | 49 1.576660804     |
| 1.686171413                                     | 1.462836624                                   | 0.835673041 |             | 0.455702493 |                    |
| 0.482606423                                     |                                               |             |             |             |                    |
| ENSG00000113645                                 | 507.15329                                     | 455.7725039 |             | 623.0955243 |                    |
| 395.7399651                                     | 220.3079228                                   | 173.3904481 |             | 528.6737727 |                    |
| 263.146112                                      | 1.007017769                                   | 0.000654634 |             | 0.009089347 | WWC1               |
| 5                                               | 168291651                                     | 168472303   |             | +           | 10076              |
| protein_coding                                  | WW and C2 domain containing 1 [Source:HGNC    |             |             |             |                    |
| Symbol;Acc:HGNC:29435]                          | -                                             | 559         | 515         | 536         | 382 193            |
| 201                                             | 2.71676662                                    | 2.421840352 |             | 3.309660734 |                    |
| 2.106625068                                     | 1.17737961                                    | 0.927553389 |             |             |                    |
| ENSG00000177700                                 | 531.6490661                                   | 1041.639295 |             | 1054.379926 |                    |
| 336.6897608                                     | 530.7937001                                   | 527.0724567 |             | 875.8894292 |                    |
| 464.8519725                                     | 0.913299282                                   | 0.000657728 |             | 0.009125141 | POLR2L             |
| 11                                              | 837356                                        | 842545      | -           | 1142        | protein_coding RNA |
| polymerase II subunit L                         | [Source:HGNC Symbol;Acc:HGNC:9199]            |             |             |             | -                  |
| 586                                             | 1177                                          | 907         | 325         | 465         | 611 25.12813147    |
| 48.83563057                                     | 49.41377459                                   | 15.81354726 |             | 25.02846466 |                    |
| 24.87746503                                     |                                               |             |             |             |                    |
| ENSG00000188191                                 | 255.8447724                                   | 432.7626299 |             | 301.0853373 |                    |
| 426.8190199                                     | 591.292767                                    | 965.2930917 |             | 329.8975799 |                    |
| 661.1349595                                     | -1.00332504                                   | 0.000665831 |             | 0.009222056 |                    |
| PRKAR1B 7                                       | 549197                                        | 727650      | -           | 4491        | protein_coding     |
| protein kinase cAMP-dependent type I regulatory | subunit beta                                  |             |             |             |                    |
| [Source:HGNC Symbol;Acc:HGNC:9390]              | -                                             |             |             | 282         | 489 259            |
| 412                                             | 518                                           | 1119        | 3.074926482 | 5.159317382 |                    |
| 3.588091881                                     | 5.097605288                                   | 7.089801319 |             | 11.58558718 |                    |
| ENSG00000196372                                 | 662.2932052                                   | 745.1659189 |             | 675.4076486 |                    |
| 971.7384482                                     | 991.9563987                                   | 1137.820901 |             | 694.2889242 |                    |
| 1033.838583                                     | -0.574616307                                  | 0.000666208 |             | 0.009222056 | ASB13              |
| 10                                              | 5638867                                       | 5666595     | -           | 3003        | protein_coding     |
| ankyrin repeat and SOCS box containing 13       | [Source:HGNC                                  |             |             |             |                    |

|                             |                                                        |                                                |             |             |                |             |  |
|-----------------------------|--------------------------------------------------------|------------------------------------------------|-------------|-------------|----------------|-------------|--|
| Symbol;Acc:HGNC:19765]      | -                                                      | 730                                            | 842         | 581         | 938            | 869         |  |
| 1319                        | 11.90409027                                            | 13.28566202                                    |             | 12.03726015 |                |             |  |
| 17.35639598                 | 17.78737268                                            | 20.4230444                                     |             |             |                |             |  |
| ENSG00000100418             | 926.3032363                                            | 1237.223224                                    |             | 1012.530227 |                |             |  |
| 1214.155076                 | 1756.755924                                            | 2314.460558                                    |             | 1058.685562 |                |             |  |
| 1761.790519                 | -0.735015656                                           | 0.000666278                                    |             | 0.009222056 |                | DESI1       |  |
| 22                          | 41598028                                               | 41621096                                       |             | -           | 4972           |             |  |
| protein_coding              | desumoylating isopeptidase 1                           | [Source:HGNC                                   |             |             |                |             |  |
| Symbol;Acc:HGNC:24577]      | -                                                      | 1021                                           | 1398        | 871         | 1172           | 1539        |  |
| 2683                        | 10.05595464                                            | 13.32301425                                    |             | 10.89918142 |                |             |  |
| 13.09810704                 | 19.02632277                                            | 25.09115024                                    |             |             |                |             |  |
| ENSG00000180104             | 1089.60841                                             | 1229.258268                                    |             | 1106.692051 |                |             |  |
| 1513.549971                 | 1902.866878                                            | 1566.552506                                    |             | 1141.85291  |                |             |  |
| 1660.989785                 | -0.54004217                                            | 0.000667841                                    |             | 0.009236464 |                | EXOC3       |  |
| 5                           | 443158                                                 | 471937                                         | +           | 8182        | protein_coding |             |  |
| exocyst complex component 3 | [Source:HGNC Symbol;Acc:HGNC:30378]                    |                                                |             |             | -              |             |  |
| 1201                        | 1389                                                   | 952                                            | 1461        | 1667        | 1816           | 7.188068643 |  |
| 8.043947203                 | 7.239095731                                            | 9.922081372                                    |             | 12.52343554 |                |             |  |
| 10.32018273                 |                                                        |                                                |             |             |                |             |  |
| ENSG00000049323             | 1469.746565                                            | 1128.36882                                     |             | 1617.025885 |                |             |  |
| 999.7095976                 | 941.7307582                                            | 791.9026436                                    |             | 1405.04709  |                |             |  |
| 911.1143331                 | 0.624873456                                            | 0.00067118                                     |             | 0.009275389 |                | LTBP1       |  |
| 2                           | 32946972                                               | 33399509                                       |             | +           | 7329           |             |  |
| protein_coding              | latent transforming growth factor beta binding protein | 1 [Source:HGNC Symbol;Acc:HGNC:6714]           |             |             |                | -           |  |
| 965                         | 825                                                    | 918                                            | 10.82427896 | 8.243125347 | 1391           |             |  |
| 11.80835103                 | 7.316352732                                            | 6.9192112                                      |             | 5.824102071 |                |             |  |
| ENSG00000144713             | 13571.5672                                             | 18481.35378                                    |             | 18205.78173 |                |             |  |
| 20616.80902                 | 24564.90414                                            | 26383.8152                                     |             | 16752.9009  |                |             |  |
| 23855.17612                 | -0.509945493                                           | 0.000682564                                    |             | 0.009425346 |                | RPL32       |  |
| 3                           | 12834485                                               | 12841588                                       |             | -           | 3720           |             |  |
| protein_coding              | ribosomal protein L32                                  | [Source:HGNC                                   |             |             |                |             |  |
| Symbol;Acc:HGNC:10336]      | -                                                      | 14959                                          | 20883       | 15661       | 19901          | 21520       |  |
| 30585                       | 196.9193102                                            | 265.9967862                                    |             | 261.9288863 |                |             |  |
| 297.2651541                 | 355.587665                                             | 382.2931912                                    |             |             |                |             |  |
| ENSG00000163527             | 5451.671055                                            | 4670.119423                                    |             | 5261.437207 |                |             |  |
| 4426.693379                 | 3031.802296                                            | 2835.494542                                    |             | 5127.742562 |                |             |  |
| 3431.330072                 | 0.579636149                                            | 0.000685931                                    |             | 0.009464455 |                | STT3B       |  |
| 3                           | 31532638                                               | 31637622                                       |             | +           | 5012           |             |  |
| protein_coding              | "STT3B, catalytic subunit of the                       | oligosaccharyltransferase complex [Source:HGNC |             |             |                |             |  |
| Symbol;Acc:HGNC:30611]"     | -                                                      | 6009                                           | 5277        | 4526        | 4273           | 2656        |  |
| 3287                        | 58.711047                                              | 49.88873279                                    |             | 56.18369967 |                |             |  |
| 47.3733257                  | 32.57349571                                            | 30.49436961                                    |             |             |                |             |  |
| ENSG00000127022             | 12744.15432                                            | 10105.75965                                    |             | 12867.62007 |                |             |  |
| 10158.70706                 | 7340.933947                                            | 5874.571898                                    |             | 11905.84468 |                |             |  |
| 7791.404302                 | 0.611769398                                            | 0.000686958                                    |             | 0.009471233 |                | CANX        |  |
| 5                           | 179678628                                              | 179730925                                      |             | +           | 6235           |             |  |
| protein_coding              | calnexin                                               | [Source:HGNC Symbol;Acc:HGNC:1473]             |             |             |                | -           |  |
| 14047                       | 11419                                                  | 11069                                          | 9806        | 6431        | 6810           | 110.3254756 |  |

|                              |                                               |              |                        |             |  |
|------------------------------|-----------------------------------------------|--------------|------------------------|-------------|--|
|                              | 86.77968232                                   | 110.4533205  | 87.3911541             | 63.40002249 |  |
|                              | 50.78572682                                   |              |                        |             |  |
| ENSG00000142039              | 1098.68092                                    | 1242.533195  | 1025.317635            |             |  |
| 1409.953122                  | 1892.593451                                   | 1690.772529  | 1122.17725             |             |  |
| 1664.4397                    | -0.568055383                                  | 0.000688888  | 0.009490456            | CCDC97      |  |
| 19                           | 41310189                                      | 41324883     | + 3821                 |             |  |
| protein_coding               | coiled-coil domain containing 97              |              | [Source:HGNC           |             |  |
| Symbol;Acc:HGNC:28289]       | -                                             | 1211 1404    | 882 1361               | 1658        |  |
| 1960                         | 15.52014552                                   | 17.41071117  | 14.36145342            |             |  |
| 19.79215718                  | 26.67195494                                   | 23.85118999  |                        |             |  |
| ENSG00000197063              | 1375.392464                                   | 1687.685757  | 1429.864729            |             |  |
| 1800.513244                  | 2377.727478                                   | 2486.988368  | 1497.64765             |             |  |
| 2221.74303                   | -0.568911067                                  | 0.000692735  | 0.009536027            | MAFG        |  |
| 17                           | 81918270                                      | 81927714     | - 5220                 |             |  |
| protein_coding               | MAF bZIP transcription factor G               |              | [Source:HGNC           |             |  |
| Symbol;Acc:HGNC:6781]        | TF_bZIP                                       | 1516 1907    | 1230 1738              | 2083        |  |
| 2883                         | 14.22189218                                   | 17.31038116  | 14.66025266            |             |  |
| 18.50083427                  | 24.52822533                                   | 25.68059948  |                        |             |  |
| ENSG00000135317              | 1163.095738                                   | 897.3850853  | 976.4929859            |             |  |
| 793.5518671                  | 555.9065203                                   | 422.6931322  | 1012.324603            |             |  |
| 590.7171732                  | 0.778137399                                   | 0.000694582  | 0.009554011            | SNX14       |  |
| 6                            | 85505496                                      | 85594156     | - 7105                 |             |  |
| protein_coding               | sorting nexin 14                              |              | [Source:HGNC           |             |  |
| -                            | 1282 1014                                     | 840 766      | 487 490                |             |  |
| 8.835937321                  | 6.762391554                                   | 7.355666838  | 5.990688404            |             |  |
| 4.213201587                  | 3.206734586                                   |              |                        |             |  |
| ENSG00000184060              | 1.814501932                                   | 3.539980612  | 11.6249165             |             |  |
| 53.87036173                  | 61.64055872                                   | 19.84069804  | 5.659799681            |             |  |
| 45.11720617                  | -3.028478763                                  | 0.00069513   | 0.009554119            | ADAP2       |  |
| 17                           | 30906344                                      | 30959322     | + 3750                 |             |  |
| protein_coding               | ArfGAP with dual PH domains 2                 |              | [Source:HGNC           |             |  |
| Symbol;Acc:HGNC:16487]       | -                                             | 2 4          | 10 52                  | 54          |  |
| 23                           | 0.026117248                                   | 0.050542319  | 0.165911152            |             |  |
| 0.770520361                  | 0.88513569                                    | 0.285185596  |                        |             |  |
| ENSG00000197712              | 1151.301476                                   | 987.6545909  | 1474.039412            |             |  |
| 912.688244                   | 698.5929988                                   | 579.6934384  | 1204.331826            |             |  |
| 730.3248938                  | 0.721496563                                   | 0.000697782  | 0.009578958            |             |  |
| FAM114A1                     | 4 38867677                                    | 38945739     | + 4871                 |             |  |
| protein_coding               | family with sequence similarity 114 member A1 |              |                        |             |  |
| [Source:HGNC                 | Symbol;Acc:HGNC:25087]                        | -            | 1269 1116              | 1268        |  |
| 881                          | 612 672                                       | 12.75769385  | 10.85606677            |             |  |
| 16.19600755                  | 10.05008703                                   | 7.722904292  | 6.414785836            |             |  |
| ENSG00000115255              | 287.5985562                                   | 382.3179061  | 259.2356379            |             |  |
| 484.8332556                  | 535.3596674                                   | 575.3802432  | 309.7173668            |             |  |
| 531.8577221                  | -0.778549923                                  | 0.00069802   | 0.009578958            | REEP6       |  |
| 19                           | 1490747 1497927                               | + 2449       | protein_coding         |             |  |
| receptor accessory protein 6 |                                               | [Source:HGNC | Symbol;Acc:HGNC:30078] |             |  |
| -                            | 317 432                                       | 223 468      | 469 667                |             |  |
| 6.338684862                  | 8.35836635                                    | 5.665300158  | 10.61864524            |             |  |
| 11.77148945                  | 12.66391733                                   |              |                        |             |  |

|                                     |                                                     |             |                |                |                |                |
|-------------------------------------|-----------------------------------------------------|-------------|----------------|----------------|----------------|----------------|
| ENSG00000104419                     | 7076.557535                                         | 8862.341463 | 17915.15882    |                |                |                |
| 25812.19102                         | 40509.262                                           | 34952.40884 | 11284.68594    |                |                |                |
| 33757.95395                         | -1.580903027                                        | 0.00069876  | 0.009579106    |                |                | NDRG1          |
| 8                                   | 133237171                                           | 133302022   | -              |                | 9823           |                |
| protein_coding                      | N-myc downstream regulated 1 [Source:HGNC           |             |                |                |                |                |
| Symbol;Acc:HGNC:7679]               | -                                                   | 7800        | 10014          | 15411          | 24916          | 35488          |
| 40518                               | 38.88473488                                         | 48.30475501 | 97.6098225     |                |                |                |
| 140.9438796                         | 222.0673656                                         | 191.793937  |                |                |                |                |
| ENSG00000132275                     | 728.5225257                                         | 905.3500416 | 669.5951903    |                |                |                |
| 1037.004463                         | 1322.989029                                         | 1188.716604 | 767.8225859    |                |                |                |
| 1182.903366                         | -0.622360045                                        | 0.000699645 | 0.009579106    |                |                | RRP8           |
| 11                                  | 6595075                                             | 6603620     | -              | 6922           | protein_coding |                |
| ribosomal RNA processing 8          | [Source:HGNC Symbol;Acc:HGNC:29030] -               |             |                |                |                |                |
| 803                                 | 1023                                                | 576         | 1001           | 1159           | 1378           | 5.680840998    |
| 7.002779949                         | 5.17723329                                          | 8.035529988 | 10.29198634    |                |                |                |
| 9.256539117                         |                                                     |             |                |                |                |                |
| ENSG00000177030                     | 1258.35709                                          | 1415.992245 | 1190.391449    |                |                |                |
| 1675.161056                         | 1828.669909                                         | 2050.493011 | 1288.246928    |                |                |                |
| 1851.441325                         | -0.523079295                                        | 0.000699655 | 0.009579106    |                |                | DEAF1          |
| 11                                  | 644233                                              | 706715      | -              | 4452           |                |                |
| protein_coding                      | "DEAF1, transcription factor [Source:HGNC           |             |                |                |                |                |
| Symbol;Acc:HGNC:14677]"             | SAND                                                | 1387        | 1600           | 1024           | 1617           | 1602           |
| 2377                                | 15.25632701                                         | 17.02908322 | 14.31039586    |                |                |                |
| 20.18212575                         | 22.11845136                                         | 24.82590243 |                |                |                |                |
| ENSG00000055163                     | 129.7368881                                         | 121.244336  | 117.4116566    |                |                |                |
| 269.3518087                         | 198.6195781                                         | 270.8686602 | 122.7976269    |                |                |                |
| 246.2800157                         | -1.004568513                                        | 0.000700635 | 0.009585094    |                |                | CYFIP2         |
| 5                                   | 157266079                                           | 157395595   | +              | 10498          |                |                |
| protein_coding                      | cytoplasmic FMR1 interacting protein 2 [Source:HGNC |             |                |                |                |                |
| Symbol;Acc:HGNC:13760]              | -                                                   | 143         | 137            | 101            | 260            | 174            |
| 314                                 | 0.667049638                                         | 0.618358649 | 0.598579242    |                |                |                |
| 1.376191348                         | 1.018802589                                         | 1.390766105 |                |                |                |                |
| ENSG00000150637                     | 9.979760626                                         | 7.964956378 | 26.73730795    |                |                | 0              |
| 0                                   | 0                                                   | 14.89400832 | 0              | 6.325289135    |                |                |
| 0.000702673                         | 0.009605548                                         | CD226       | 18             | 69831158       |                |                |
| 69961803                            | -                                                   | 13638       | protein_coding | CD226 molecule |                |                |
| [Source:HGNC Symbol;Acc:HGNC:16961] | -                                                   |             |                | 11             | 9              | 23             |
| 0                                   | 0                                                   | 0           | 0.039497598    | 0.031269308    |                |                |
| 0.104926213                         | 0                                                   | 0           | 0              |                |                |                |
| ENSG00000187624                     | 9.979760626                                         | 34.51481097 | 27.8997996     |                |                |                |
| 70.44585765                         | 99.30978905                                         | 103.5166854 | 24.13145706    |                |                |                |
| 91.09077738                         | -1.919120386                                        | 0.000703693 | 0.009612065    |                |                |                |
| C17orf97                            | 17                                                  | 410327      | 431062         | +              | 2710           | protein_coding |
| chromosome 17 open reading frame 97 | [Source:HGNC                                        |             |                |                |                |                |
| Symbol;Acc:HGNC:33800]              | -                                                   | 11          | 39             | 24             | 68             | 87             |
| 120                                 | 0.198770568                                         | 0.681901675 | 0.550996446    |                |                |                |
| 1.394285354                         | 1.973319111                                         | 2.058936598 |                |                |                |                |
| ENSG00000145425                     | 17160.65202                                         | 18976.06607 | 24834.30912    |                |                |                |
| 26950.72039                         | 30827.12831                                         | 28439.48404 | 20323.67574    |                |                |                |
| 28739.11092                         | -0.499931683                                        | 0.000704977 | 0.009622178    |                |                | RPS3A          |

|                                     |                                                   |             |             |        |  |
|-------------------------------------|---------------------------------------------------|-------------|-------------|--------|--|
| 4                                   | 151099573                                         | 151104652   | +           | 2341   |  |
| protein_coding                      | ribosomal protein S3A [Source:HGNC                |             |             |        |  |
| Symbol;Acc:HGNC:10421]              | -                                                 | 18915 21442 | 21363 26015 | 27006  |  |
| 32968                               | 395.6704487                                       | 434.0005889 | 567.7637666 |        |  |
| 617.4964429                         | 709.0979173                                       | 654.8204078 |             |        |  |
| ENSG00000163877                     | 800.195352                                        | 821.2755021 | 823.0440881 |        |  |
| 1017.321062                         | 1263.631454                                       | 1383.673029 | 814.8383141 |        |  |
| 1221.541848                         | -0.584543125                                      | 0.000707863 | 0.009654122 | SNIP1  |  |
| 1                                   | 37534449                                          | 37554344    | - 5769      |        |  |
| protein_coding                      | Smad nuclear interacting protein 1 [Source:HGNC   |             |             |        |  |
| Symbol;Acc:HGNC:30587]              | -                                                 | 882 928     | 708 982     | 1107   |  |
| 1604                                | 7.486808586                                       | 7.622086588 | 7.635536637 |        |  |
| 9.458515774                         | 11.79490486                                       | 12.92810418 |             |        |  |
| ENSG00000172216                     | 2529.415693                                       | 4209.921943 | 4101.270541 |        |  |
| 4054.780689                         | 6528.191765                                       | 7401.443008 | 3613.536059 |        |  |
| 5994.805154                         | -0.730498597                                      | 0.000709624 | 0.009664252 | CEBPB  |  |
| 20                                  | 50190734                                          | 50192689    | + 1956      |        |  |
| protein_coding                      | CCAAT enhancer binding protein beta [Source:HGNC  |             |             |        |  |
| Symbol;Acc:HGNC:1834]               | C/EBP                                             | 2788 4757   | 3528 3914   | 5719   |  |
| 8580                                | 69.79954675                                       | 115.2366811 | 112.2190461 |        |  |
| 111.1895607                         | 179.7209089                                       | 203.9620909 |             |        |  |
| ENSG00000162385                     | 611.4871511                                       | 964.6447169 | 848.6189044 |        |  |
| 391.5960911                         | 497.6904371                                       | 545.1878766 | 808.2502575 |        |  |
| 478.1581349                         | 0.756616517                                       | 0.000709699 | 0.009664252 | MAGOH  |  |
| 1                                   | 53226892                                          | 53238610    | - 1463      |        |  |
| protein_coding                      | "mago homolog, exon junction complex subunit      |             |             |        |  |
| [Source:HGNC Symbol;Acc:HGNC:6815]" | -                                                 | 674 1090    | 730         |        |  |
| 378                                 | 436 632                                           | 22.56026797 | 35.30275613 |        |  |
| 31.04455083                         | 14.35686172                                       | 18.31848374 | 20.08647693 |        |  |
| ENSG00000117360                     | 1839.904959                                       | 2079.73861  | 1902.998831 |        |  |
| 2477.000671                         | 2848.022111                                       | 2710.41188  | 1940.8808   |        |  |
| 2678.478221                         | -0.46452195                                       | 0.000710497 | 0.009667672 | PRPF3  |  |
| 1                                   | 150321476                                         | 150353195   | + 5373      |        |  |
| protein_coding                      | pre-mRNA processing factor 3 [Source:HGNC         |             |             |        |  |
| Symbol;Acc:HGNC:17348]              | -                                                 | 2028 2350   | 1637 2391   | 2495   |  |
| 3142                                | 18.48331196                                       | 20.7241851  | 18.95565018 |        |  |
| 24.72719076                         | 28.54309543                                       | 27.19069812 |             |        |  |
| ENSG00000151725                     | 1306.441391                                       | 1152.263689 | 1038.105043 |        |  |
| 836.0265754                         | 783.0633941                                       | 738.4190228 | 1165.603375 |        |  |
| 785.8363308                         | 0.569639119                                       | 0.00071851  | 0.009762564 | CENPU  |  |
| 4                                   | 184694618                                         | 184734133   | - 2953      |        |  |
| protein_coding                      | centromere protein U [Source:HGNC                 |             |             |        |  |
| Symbol;Acc:HGNC:21348]              | -                                                 | 1440 1302   | 893 807     | 686    |  |
| 856                                 | 23.87963744                                       | 20.89170949 | 18.81459432 |        |  |
| 15.18525647                         | 14.27933653                                       | 13.47849295 |             |        |  |
| ENSG00000145916                     | 401.004927                                        | 522.1471403 | 431.2844021 |        |  |
| 640.2285298                         | 722.5643272                                       | 810.8807026 | 451.4788231 |        |  |
| 724.5578532                         | -0.682393278                                      | 0.000718679 | 0.009762564 | RMND5B |  |
| 5                                   | 178130996                                         | 178150565   | + 7701      |        |  |
| protein_coding                      | required for meiotic nuclear division 5 homolog B |             |             |        |  |



|                                     |                                              |                                    |              |             |
|-------------------------------------|----------------------------------------------|------------------------------------|--------------|-------------|
| [Source:HGNC Symbol;Acc:HGNC:26181] | -                                            | 442                                | 590          | 371         |
| 618                                 | 633                                          | 940                                | 2.810630984  | 3.630206492 |
| 2.997323597                         | 4.459163488                                  | 5.052472366                        | 5.675599586  |             |
| ENSG00000122970                     | 605.1363943                                  | 301.7833472                        | 404.5470942  |             |
| 261.0640607                         | 186.063168                                   | 216.5224004                        | 437.1556119  |             |
| 221.216543                          | 0.982457655                                  | 0.000719126                        | 0.009762564  | IFT81       |
| 12                                  | 110124335                                    | 110218797                          | + 7005       |             |
| protein_coding                      | intraflagellar transport                     | 81                                 | [Source:HGNC |             |
| Symbol;Acc:HGNC:14313]              | -                                            | 667                                | 341          | 348         |
| 251                                 | 4.662795599                                  | 2.306602085                        | 3.090850155  | 163         |
| 1.99896157                          | 1.430298967                                  | 1.666082873                        |              |             |
| ENSG00000103316                     | 42.6407954                                   | 30.08983521                        | 22.08734135  |             |
| 84.94941658                         | 141.5449867                                  | 81.9507093                         | 31.60599065  |             |
| 102.8150375                         | -1.693835079                                 | 0.000720876                        | 0.009778819  | CRYM        |
| 16                                  | 21238874                                     | 21303083                           | - 3782       |             |
| protein_coding                      | crystallin mu                                | [Source:HGNC Symbol;Acc:HGNC:2418] |              |             |
| -                                   | 47                                           | 34                                 | 19           | 82          |
| 0.608562261                         | 0.425974727                                  | 0.312563976                        | 1.204770629  |             |
| 2.01533627                          | 1.167973795                                  |                                    |              |             |
| ENSG00000182492                     | 8521.808323                                  | 7928.671577                        | 16384.15731  |             |
| 2868.596762                         | 4668.701577                                  | 1695.085724                        | 10944.87907  |             |
| 3077.461355                         | 1.83051108                                   | 0.000723602                        | 0.009804776  | BGN         |
| X                                   | 153494939                                    | 153509554                          | + 2453       |             |
| protein_coding                      | biglycan                                     | [Source:HGNC Symbol;Acc:HGNC:1044] |              | -           |
| 9393                                | 8959                                         | 14094                              | 2769         | 4090        |
| 173.0567045                         | 357.4732638                                  | 62.72453511                        | 1965         | 187.5147597 |
| 37.2474053                          |                                              |                                    | 102.488024   |             |
| ENSG00000170035                     | 1665.712774                                  | 1439.887114                        | 1828.599365  |             |
| 1138.529376                         | 1065.011876                                  | 1205.106746                        | 1644.733084  |             |
| 1136.215999                         | 0.532699806                                  | 0.00072417                         | 0.009804776  | UBE2E3      |
| 2                                   | 180967248                                    | 181076585                          | + 2973       |             |
| protein_coding                      | ubiquitin conjugating enzyme                 | E2 E3                              | [Source:HGNC |             |
| Symbol;Acc:HGNC:12479]              | -                                            | 1836                               | 1627         | 1573        |
| 1397                                | 30.24171743                                  | 25.93098922                        | 32.91854719  | 933         |
| 20.54068047                         | 19.29008293                                  | 21.84904781                        |              |             |
| ENSG00000196369                     | 273.9897917                                  | 359.3080322                        | 356.8849365  |             |
| 209.265636                          | 166.6578069                                  | 144.9233596                        | 330.0609201  |             |
| 173.6156008                         | 0.9275593                                    | 0.000724453                        | 0.009804776  |             |
| SRGAP2B 1                           | 144887265                                    | 145095528                          | - 7230       |             |
| protein_coding                      | SLIT-ROBO Rho GTPase activating              | protein 2B                         |              |             |
| [Source:HGNC Symbol;Acc:HGNC:35237] | -                                            | 302                                | 406          | 307         |
| 202                                 | 146                                          | 168                                | 2.045489852  | 2.660811918 |
| 2.641842514                         | 1.552476789                                  | 1.241257594                        | 1.080443354  |             |
| ENSG00000004776                     | 175.0994364                                  | 108.8544038                        | 86.02438209  |             |
| 42.47470829                         | 47.94265678                                  | 38.81875704                        | 123.3260741  |             |
| 43.07870737                         | 1.521628837                                  | 0.000728628                        | 0.009853752  | HSPB6       |
| 19                                  | 35754569                                     | 35758079                           | - 1721       |             |
| protein_coding                      | heat shock protein family B (small) member 6 |                                    |              |             |
| [Source:HGNC Symbol;Acc:HGNC:26511] | -                                            | 193                                | 123          | 74          |
| 41                                  | 42                                           | 45                                 | 5.491678726  | 3.386496896 |

|                       |                                                |             |             |        |
|-----------------------|------------------------------------------------|-------------|-------------|--------|
| 2.675208872           | 1.323777606                                    | 1.500084696 | 1.215801463 |        |
| ENSG00000185624       | 10476.93416                                    | 11344.75287 | 14399.78407 |        |
| 9406.593934           | 8564.613187                                    | 7669.723752 | 12073.8237  |        |
| 8546.976957           | 0.498332573                                    | 0.00073154  | 0.009885569 | P4HB   |
| 17                    | 81843159                                       | 81860694    | - 5303      |        |
| protein_coding        | prolyl 4-hydroxylase subunit beta [Source:HGNC |             |             |        |
| Symbol;Acc:HGNC:8548] | -                                              | 11548 12819 | 12387 9080  | 7503   |
| 8891                  | 106.6384519                                    | 114.5404701 | 145.3286894 |        |
| 95.14287377           | 86.96823966                                    | 77.95787658 |             |        |
| ENSG00000129682       | 34.47553671                                    | 18.58489822 | 9.299933199 |        |
| 49.72648776           | 113.007691                                     | 99.20349021 | 20.78678937 |        |
| 87.31255632           | -2.059458962                                   | 0.000733225 | 0.009900138 | FGF13  |
| X                     | 138614731                                      | 139222777   | - 20681     |        |
| protein_coding        | fibroblast growth factor 13 [Source:HGNC       |             |             |        |
| Symbol;Acc:HGNC:3670] | -                                              | 38 21       | 8 48        | 99     |
| 115                   | 0.089978914                                    | 0.048114303 | 0.024067185 |        |
| 0.128967935           | 0.294246307                                    | 0.25855761  |             |        |
| ENSG00000136859       | 118.8498765                                    | 133.6342681 | 224.3608884 |        |
| 81.8415111            | 15.98088559                                    | 43.13195226 | 158.9483444 |        |
| 46.98478299           | 1.753800709                                    | 0.000733737 | 0.009900138 |        |
| ANGPTL2 9             | 127087332                                      | 127122883   | - 3889      |        |
| protein_coding        | angiopoietin like 2 [Source:HGNC               |             |             |        |
| -                     | 131 151                                        | 193 79      | 14 50       |        |
| 1.649536904           | 1.8397781                                      | 3.087636829 | 1.128758911 |        |
| 0.2212776             | 0.597809868                                    |             |             |        |
| ENSG00000168243       | 736.6877844                                    | 549.5819901 | 835.8314963 |        |
| 486.9051926           | 423.4934683                                    | 299.3357487 | 707.3670902 |        |
| 403.2448032           | 0.811377074                                    | 0.000737236 | 0.009939766 | GNG4   |
| 1                     | 235547687                                      | 235650754   | - 5401      |        |
| protein_coding        | G protein subunit gamma 4 [Source:HGNC         |             |             |        |
| Symbol;Acc:HGNC:4407] | -                                              | 812 621     | 719 470     | 371    |
| 347                   | 7.362249573                                    | 5.448084862 | 8.282502196 |        |
| 4.835436944           | 4.222280607                                    | 2.987351429 |             |        |
| ENSG00000117724       | 4411.054197                                    | 2724.900076 | 3022.47829  |        |
| 1616.110852           | 638.0939319                                    | 496.017451  | 3386.144188 |        |
| 916.740745            | 1.885180481                                    | 0.000742717 | 0.01000603  | CENPF  |
| 1                     | 214603195                                      | 214664588   | + 11690     |        |
| protein_coding        | centromere protein F [Source:HGNC              |             |             |        |
| Symbol;Acc:HGNC:1857] | -                                              | 4862 3079   | 2600 1560   | 559    |
| 575                   | 20.36709677                                    | 12.48020211 | 13.83775648 |        |
| 7.415187394           | 2.939305024                                    | 2.287095775 |             |        |
| ENSG00000140379       | 2.721752898                                    | 17.69990306 | 16.2748831  |        |
| 78.73360561           | 79.90442797                                    | 39.68139608 | 12.23217969 |        |
| 66.10647656           | -2.439165403                                   | 0.000744742 | 0.010025682 | BCL2A1 |
| 15                    | 79960889                                       | 79971446    | - 1089      |        |
| protein_coding        | BCL2 related protein A1 [Source:HGNC           |             |             |        |
| Symbol;Acc:HGNC:991]  | -                                              | 3 20        | 14 76       | 70     |
| 46                    | 0.13490314                                     | 0.870218991 | 0.799847152 |        |
| 3.877910273           | 3.951095441                                    | 1.964088126 |             |        |
| ENSG00000138336       | 86.18884177                                    | 76.10958317 | 127.8740815 |        |

|                                             |                                               |             |                |        |
|---------------------------------------------|-----------------------------------------------|-------------|----------------|--------|
| 29.00711786                                 | 37.66923033                                   | 25.01653231 | 96.72416881    |        |
| 30.5642935                                  | 1.664136661                                   | 0.000748148 | 0.010063871    | TET1   |
| 10                                          | 68560656                                      | 68694482    | + 9288         |        |
| protein_coding                              | tet methylcytosine dioxygenase 1 [Source:HGNC |             |                |        |
| Symbol;Acc:HGNC:29484]                      | -                                             | 95 86       | 110 28         | 33     |
| 29                                          | 0.500875838                                   | 0.438735408 | 0.736847009    |        |
| 0.16751275                                  | 0.218393191                                   | 0.145180006 |                |        |
| ENSG00000102384                             | 938.0974988                                   | 650.4714375 | 743.9946559    |        |
| 615.365286                                  | 279.6654979                                   | 181.1541995 | 777.5211974    |        |
| 358.7283278                                 | 1.117106016                                   | 0.000749971 | 0.010071164    | CENPI  |
| X                                           | 101098218                                     | 101163681   | + 4321         |        |
| protein_coding                              | centromere protein I [Source:HGNC             |             |                |        |
| Symbol;Acc:HGNC:3968]                       | -                                             | 1034 735    | 640 594        | 245    |
| 210                                         | 11.71830928                                   | 8.059897404 | 9.215153086    |        |
| 7.638607982                                 | 3.48521182                                    | 2.259779406 |                |        |
| ENSG00000124207                             | 7864.051373                                   | 6432.144773 | 7281.847695    |        |
| 6281.076985                                 | 4116.219532                                   | 3925.007656 | 7192.68128     |        |
| 4774.101391                                 | 0.591357685                                   | 0.000750481 | 0.010071164    | CSE1L  |
| 20                                          | 49046246                                      | 49096960    | + 3800         |        |
| protein_coding                              | chromosome segregation 1 like [Source:HGNC    |             |                |        |
| Symbol;Acc:HGNC:2431]                       | -                                             | 8668 7268   | 6264 6063      | 3606   |
| 4550                                        | 111.702782                                    | 90.62703317 | 102.5592884    |        |
| 88.65760912                                 | 58.32966551                                   | 55.67481956 |                |        |
| ENSG00000165271                             | 3096.447547                                   | 3521.395714 | 2862.054442    |        |
| 3794.752597                                 | 4393.602047                                   | 5909.940099 | 3159.965901    |        |
| 4699.431581                                 | -0.572637629                                  | 0.00075072  | 0.010071164    | NOL6   |
| 9                                           | 33461441                                      | 33473930    | - 5906         |        |
| protein_coding                              | nucleolar protein 6 [Source:HGNC              |             |                |        |
| Symbol;Acc:HGNC:19910]                      | -                                             | 3413 3979   | 2462 3663      | 3849   |
| 6851                                        | 28.29902867                                   | 31.92323812 | 25.93590774    |        |
| 34.4631936                                  | 40.05915911                                   | 53.93759066 |                |        |
| ENSG00000189369                             | 361.9931354                                   | 369.927974  | 395.247161     |        |
| 572.8905777                                 | 741.9696883                                   | 533.973569  | 375.7227568    |        |
| 616.277945                                  | -0.713343448                                  | 0.000750968 | 0.010071164    | GSPT2  |
| X                                           | 51743431                                      | 51746232    | + 2802         |        |
| protein_coding                              | G1 to S phase transition 2 [Source:HGNC       |             |                |        |
| Symbol;Acc:HGNC:4622]                       | -                                             | 399 418     | 340 553        | 650    |
| 619                                         | 6.973221304                                   | 7.068619292 | 7.549490322    |        |
| 10.96652528                                 | 14.25911547                                   | 10.27196512 |                |        |
| ENSG00000004660                             | 430.9442088                                   | 596.4867332 | 381.2972612    |        |
| 642.3004668                                 | 737.403721                                    | 1155.936321 | 469.5760677    |        |
| 845.2135028                                 | -0.847735233                                  | 0.000753204 | 0.0100935      | CAMKK1 |
| 17                                          | 3860315 3894891                               | - 7424      | protein_coding |        |
| calcium/calmodulin dependent protein kinase | kinase 1 [Source:HGNC                         |             |                |        |
| Symbol;Acc:HGNC:1469]                       | -                                             | 475 674     | 328 620        | 646    |
| 1340                                        | 3.133172672                                   | 4.301781764 | 2.748797373    |        |
| 4.64051061                                  | 5.348622106                                   | 8.392625675 |                |        |
| ENSG00000151914                             | 6250.051905                                   | 4703.749239 | 6418.116399    |        |
| 4651.498542                                 | 3778.337951                                   | 3537.682725 | 5790.639181    |        |
| 3989.173073                                 | 0.537580744                                   | 0.000757516 | 0.010135757    | DST    |

|                                                  |                                                        |             |             |             |             |
|--------------------------------------------------|--------------------------------------------------------|-------------|-------------|-------------|-------------|
| 6                                                | 56457987                                               | 56954628    | -           | 42341       |             |
| protein_coding                                   | dystonin [Source:HGNC Symbol;Acc:HGNC:1090]            |             |             |             | -           |
| 6889                                             | 5315                                                   | 5521        | 4490        | 3310        | 4101        |
|                                                  | 5.947967664                                            | 8.11266388  | 5.892468557 | 4.8052307   |             |
|                                                  | 4.503598611                                            |             |             |             |             |
| ENSG00000115295                                  | 291.2275601                                            | 240.7186816 | 220.8734135 |             |             |
| 379.1644691                                      | 566.1799468                                            | 410.6161856 | 250.9398851 |             |             |
| 451.9868672                                      | -0.846715901                                           | 0.000757769 | 0.010135757 |             | CLIP4       |
| 2                                                | 29097705                                               | 29189643    | +           | 7775        |             |
| protein_coding                                   | CAP-Gly domain containing linker protein family member |             |             |             |             |
| 4 [Source:HGNC Symbol;Acc:HGNC:26108]            | -                                                      | 321         | 272         | 190         |             |
| 366                                              | 496                                                    | 476         | 2.02177731  | 1.657658051 |             |
| 1.520407663                                      | 2.615728904                                            | 3.921287085 | 2.846672941 |             |             |
| ENSG00000126243                                  | 681.3454755                                            | 867.2952501 | 750.9696058 |             |             |
| 931.3356769                                      | 1302.442176                                            | 1394.024697 | 766.5367771 |             |             |
| 1209.267517                                      | -0.65779274                                            | 0.000758076 | 0.010135757 |             | LRFN3       |
| 19                                               | 35935358                                               | 35945767    | +           | 4044        |             |
| protein_coding                                   | leucine rich repeat and fibronectin type III domain    |             |             |             |             |
| containing 3 [Source:HGNC Symbol;Acc:HGNC:28370] | -                                                      |             |             | 751         |             |
| 980                                              | 646                                                    | 899         | 1141        | 1616        | 9.094052847 |
| 11.48262996                                      | 9.938668787                                            | 12.35266286 | 17.3429055  |             |             |
| 18.5806639                                       |                                                        |             |             |             |             |
| ENSG00000166801                                  | 1933.351809                                            | 1466.436969 | 1653.063126 |             |             |
| 1377.838098                                      | 916.617938                                             | 915.260027  | 1684.283968 |             |             |
| 1069.905354                                      | 0.654837097                                            | 0.000760354 | 0.010158536 |             |             |
| FAM111A 11                                       | 59142748                                               | 59155039    | +           | 7221        |             |
| protein_coding                                   | family with sequence similarity 111 member A           |             |             |             |             |
| [Source:HGNC Symbol;Acc:HGNC:24725]              | -                                                      | 2131        | 1657        | 1422        |             |
| 1330                                             | 803                                                    | 1061        | 14.45156193 | 10.87305549 |             |
| 12.25205952                                      | 10.23449315                                            | 6.835425598 | 6.832018867 |             |             |
| ENSG00000110104                                  | 1662.991021                                            | 2212.487883 | 2141.309619 |             |             |
| 2420.022404                                      | 3135.678052                                            | 3392.759365 | 2005.596174 |             |             |
| 2982.81994                                       | -0.572959849                                           | 0.000762095 | 0.010166648 |             | CCDC86      |
| 11                                               | 60842071                                               | 60851081    | +           | 3384        |             |
| protein_coding                                   | coiled-coil domain containing 86 [Source:HGNC          |             |             |             |             |
| Symbol;Acc:HGNC:28359]                           | -                                                      | 1833        | 2500        | 1842        | 2336        |
| 3933                                             | 26.52532991                                            | 35.00548467 | 33.86617265 |             | 2747        |
| 38.35787396                                      | 49.89714135                                            | 54.04115347 |             |             |             |
| ENSG00000101335                                  | 948.0772594                                            | 1277.933001 | 1414.752338 |             |             |
| 776.9763712                                      | 866.3922976                                            | 672.8584553 | 1213.587533 |             |             |
| 772.075708                                       | 0.652660878                                            | 0.000762111 | 0.010166648 |             | MYL9        |
| 20                                               | 36541484                                               | 36551447    | +           | 2821        |             |
| protein_coding                                   | myosin light chain 9 [Source:HGNC                      |             |             |             |             |
| Symbol;Acc:HGNC:15754]                           | -                                                      | 1045        | 1444        | 1217        | 750         |
| 780                                              | 18.14019235                                            | 24.25440069 | 26.84073095 |             | 759         |
| 14.77305181                                      | 16.53811661                                            | 12.8564935  |             |             |             |
| ENSG00000184445                                  | 1488.798835                                            | 1025.709382 | 1105.529559 |             |             |
| 930.2997084                                      | 672.3386868                                            | 442.5338302 | 1206.679259 |             |             |
| 681.7240751                                      | 0.824913174                                            | 0.000767786 | 0.010234641 |             | KNTC1       |
| 12                                               | 122527246                                              | 122626396   | +           | 11325       |             |

|                                               |                                                      |             |      |                |             |        |
|-----------------------------------------------|------------------------------------------------------|-------------|------|----------------|-------------|--------|
| protein_coding                                | kinetochore associated 1 [Source:HGNC                |             |      |                |             |        |
| Symbol;Acc:HGNC:17255]                        | -                                                    | 1641        | 1159 | 951            | 898         | 589    |
| 513                                           | 7.095762222                                          | 4.849217526 |      | 5.224553164    |             |        |
| 4.406057593                                   | 3.196866085                                          | 2.106251234 |      |                |             |        |
| ENSG00000171617                               | 1222.974302                                          | 1078.809092 |      | 1141.5668      |             |        |
| 923.047929                                    | 668.9142113                                          | 590.907746  |      | 1147.783398    |             |        |
| 727.6232954                                   | 0.658163804                                          | 0.000774044 |      | 0.010303045    |             | ENC1   |
| 5                                             | 74627406                                             | 74641424    |      | -              | 5858        |        |
| protein_coding                                | ectodermal-neural cortex 1 [Source:HGNC              |             |      |                |             |        |
| Symbol;Acc:HGNC:3345]                         | -                                                    | 1348        | 1219 | 982            | 891         | 586    |
| 685                                           | 11.26858042                                          | 9.86008773  |      | 10.42963157    |             |        |
| 8.451628138                                   | 6.148874214                                          | 5.437161365 |      |                |             |        |
| ENSG00000213030                               | 77.11633211                                          | 89.38451047 |      | 79.04943219    |             |        |
| 35.22292883                                   | 12.55641011                                          | 5.175834272 |      | 81.85009159    |             |        |
| 17.6517244                                    | 2.221159858                                          | 0.000774083 |      | 0.010303045    |             | CGB8   |
| 19                                            | 49047638                                             | 49049106    |      | -              | 882         |        |
| protein_coding                                | chorionic gonadotropin subunit beta 8 [Source:HGNC   |             |      |                |             |        |
| Symbol;Acc:HGNC:16453]                        | -                                                    | 85          | 101  | 68             | 34          | 11     |
| 6                                             | 4.71931563                                           | 5.425993004 |      | 4.796750994    |             |        |
| 2.142014348                                   | 0.766604669                                          | 0.316310554 |      |                |             |        |
| ENSG00000170442                               | 20.86677222                                          | 63.71965102 |      | 46.499666      |             | 0      |
| 0                                             | 9.489029498                                          | 43.69536308 |      | 3.163009833    |             |        |
| 3.724192417                                   | 0.000776579                                          | 0.010328502 |      | KRT86          | 12          |        |
| 52249300                                      | 52309163                                             | + 2394      |      | protein_coding |             |        |
| keratin 86 [Source:HGNC                       | Symbol;Acc:HGNC:6463]                                | -           |      | 23             | 72          |        |
| 40                                            | 0                                                    | 0           | 11   | 0.470470475    | 1.425065385 |        |
| 1.039543559                                   | 0                                                    | 0           | 0    | 0.213648357    |             |        |
| ENSG00000068308                               | 1153.115978                                          | 1301.82787  |      | 1354.302772    |             |        |
| 1529.089498                                   | 1902.866878                                          | 2293.757221 |      | 1269.748873    |             |        |
| 1908.571199                                   | -0.588634294                                         | 0.000778573 |      | 0.010347246    |             | OTUD5  |
| X                                             | 48922028                                             | 48958386    |      | -              | 3592        |        |
| protein_coding                                | OTU deubiquitinase 5 [Source:HGNC                    |             |      |                |             |        |
| Symbol;Acc:HGNC:25402]                        | -                                                    | 1271        | 1471 | 1165           | 1476        | 1667   |
| 2659                                          | 17.32757974                                          | 19.4045147  |      | 20.17885149    |             |        |
| 22.8329525                                    | 28.52637796                                          | 34.42017131 |      |                |             |        |
| ENSG00000127666                               | 537.0925719                                          | 651.3564327 |      | 757.9445557    |             |        |
| 791.4799301                                   | 1162.038681                                          | 1243.925503 |      | 648.7978534    |             |        |
| 1065.814705                                   | -0.717342296                                         | 0.000779306 |      | 0.010349205    |             | TICAM1 |
| 19                                            | 4815932 4831704                                      | - 2676      |      | protein_coding | toll        |        |
| like receptor adaptor molecule 1 [Source:HGNC | Symbol;Acc:HGNC:18348]                               |             |      |                |             |        |
| -                                             | 592 736                                              | 652 764     |      | 1018 1442      |             |        |
| 10.83338759                                   | 13.0322123                                           | 15.15892252 |      | 15.86424079    |             |        |
| 23.38347378                                   | 25.05590937                                          |             |      |                |             |        |
| ENSG00000156802                               | 4746.737054                                          | 3406.346344 |      | 3969.908984    |             |        |
| 3505.717387                                   | 2047.83634                                           | 1614.860293 |      | 4040.997461    |             |        |
| 2389.47134                                    | 0.758248271                                          | 0.000780544 |      | 0.010357874    |             | ATAD2  |
| 8                                             | 123319850                                            | 123416350   |      | -              | 7118        |        |
| protein_coding                                | "ATPase family, AAA domain containing 2 [Source:HGNC |             |      |                |             |        |
| Symbol;Acc:HGNC:30123]"                       | -                                                    | 5232 3849   |      | 3415 3384      | 1794        |        |
| 1872                                          | 35.9946898                                           | 25.62219713 |      | 29.84967253    |             |        |

|                                     |                                                        |             |             |             |             |       |
|-------------------------------------|--------------------------------------------------------|-------------|-------------|-------------|-------------|-------|
| 26.41705585                         | 15.49215435                                            | 12.22866024 |             |             |             |       |
| ENSG00000233922                     | 721.264518                                             | 808.88557   | 396.4096526 |             |             |       |
| 945.8392358                         | 1106.105581                                            | 1348.304828 | 642.1865802 |             |             |       |
| 1133.416548                         | -0.818178797                                           | 0.000782085 | 0.010370538 |             |             |       |
| LINC01694                           | 21                                                     | 45593654    | 45603056    | +           |             | 6810  |
|                                     | lincRNA long intergenic non-protein coding RNA 1694    |             |             |             |             |       |
| [Source:HGNC Symbol;Acc:HGNC:52481] | -                                                      |             | 795         | 914         |             | 341   |
|                                     | 913                                                    | 969         | 1563        | 5.716743416 | 6.359537384 |       |
| 3.115402139                         | 7.449647257                                            | 8.746293066 | 10.67192794 |             |             |       |
| ENSG00000102554                     | 224.0909886                                            | 192.0439482 | 239.4732799 |             |             |       |
| 319.0782964                         | 472.5776169                                            | 393.3634046 | 218.5360722 |             |             |       |
| 395.0064393                         | -0.854684641                                           | 0.000785024 | 0.010401712 |             |             | KLF5  |
|                                     | 13                                                     | 73054976    | 73077542    | +           | 3893        |       |
| protein_coding                      | Kruppel like factor 5 [Source:HGNC                     |             |             |             |             |       |
| Symbol;Acc:HGNC:6349]               | zf-C2H2                                                | 247         | 217         | 206         | 308         | 414   |
|                                     | 456                                                    | 3.106999856 | 2.641202933 | 3.292226173 |             |       |
| 4.396209257                         | 6.536771404                                            | 5.446424116 |             |             |             |       |
| ENSG00000267260                     | 17.23776835                                            | 7.079961225 | 10.46242485 |             |             |       |
| 29.00711786                         | 94.74382174                                            | 58.65945508 | 11.59338481 |             |             |       |
| 60.80346489                         | -2.387706136                                           | 0.000785817 | 0.010404428 |             |             |       |
| AC020928.1                          | 19                                                     | 36773153    | 36777078    | +           |             | 2050  |
|                                     | lincRNA uncharacterized LOC728485 [Source:NCBI         |             |             |             |             |       |
| gene;Acc:728485]                    | -                                                      | 19          | 8           | 9           | 28          | 83    |
|                                     | 68                                                     | 0.453866808 | 0.184910923 | 0.273146409 |             |       |
| 0.758955328                         | 2.48869452                                             | 1.542361123 |             |             |             |       |
| ENSG00000108846                     | 113.4063707                                            | 130.0942875 | 152.2864061 |             |             |       |
| 45.58261378                         | 47.94265678                                            | 61.24737221 | 131.9290215 |             |             |       |
| 51.59088092                         | 1.350211652                                            | 0.000787335 | 0.010416736 |             |             | ABCC3 |
|                                     | 17                                                     | 50634777    | 50692252    | +           | 9614        |       |
| protein_coding                      | ATP binding cassette subfamily C member 3 [Source:HGNC |             |             |             |             |       |
| Symbol;Acc:HGNC:54]                 | -                                                      | 125         | 147         | 131         | 44          | 42    |
|                                     | 71                                                     | 0.636699603 | 0.724502115 | 0.847762153 |             |       |
| 0.25430834                          | 0.268529827                                            | 0.343388107 |             |             |             |       |
| ENSG00000197622                     | 2044.036426                                            | 1772.645292 | 2087.835003 |             |             |       |
| 1287.708839                         | 1287.602782                                            | 1551.025003 | 1968.17224  |             |             |       |
| 1375.445542                         | 0.516112893                                            | 0.000792438 | 0.010476414 |             |             |       |
| CDC42SE1                            | 1                                                      | 151050971   | 151070325   | -           |             | 4184  |
|                                     | protein_coding CDC42 small effector 1 [Source:HGNC     |             |             |             |             |       |
| Symbol;Acc:HGNC:17719]              | -                                                      | 2253        | 2003        | 1796        | 1243        | 1128  |
|                                     | 1798                                                   | 26.36927561 | 22.68379502 | 26.70677841 |             |       |
| 16.50788734                         | 16.57161305                                            | 19.98154335 |             |             |             |       |
| ENSG00000136631                     | 1012.492078                                            | 911.5450077 | 1018.342685 |             |             |       |
| 758.3289383                         | 559.3309958                                            | 598.6714974 | 980.793257  |             |             |       |
| 638.7771438                         | 0.618345352                                            | 0.000796919 | 0.010527778 |             |             | VPS45 |
|                                     | 1                                                      | 150067279   | 150145329   | +           | 6637        |       |
| protein_coding                      | vacuolar protein sorting 45 homolog [Source:HGNC       |             |             |             |             |       |
| Symbol;Acc:HGNC:14579]              | -                                                      | 1116        | 1030        | 876         | 732         | 490   |
|                                     | 694                                                    | 8.234193348 | 7.353461922 | 8.21181459  |             |       |
| 6.128459312                         | 4.538074514                                            | 4.862041606 |             |             |             |       |
| ENSG00000197363                     | 243.1432589                                            | 380.5479158 | 262.7231129 |             |             |       |

|                        |                                                        |                     |               |        |
|------------------------|--------------------------------------------------------|---------------------|---------------|--------|
| 418.5312719            | 538.7841429                                            | 659.9188696         | 295.4714292   |        |
| 539.0780948            | -0.867061201                                           | 0.000801143         | 0.010575681   | ZNF517 |
| 8                      | 144798876                                              | 144811169           | + 5308        |        |
| protein_coding         | zinc finger protein 517 [Source:HGNC                   |                     |               |        |
| Symbol;Acc:HGNC:27984] | zf-C2H2                                                | 268 430             | 226 404       | 472    |
| 765                    | 2.472478725                                            | 3.838521542         | 2.64901472    |        |
| 4.229241592            | 5.465859257                                            | 6.701338244         |               |        |
| ENSG00000224877        | 497.1735294                                            | 631.0015442         | 580.0833333   |        |
| 319.0782964            | 369.8433523                                            | 362.308399          | 569.4194689   |        |
| 350.4100159            | 0.700376432                                            | 0.000802848         | 0.010590284   |        |
| NDUFAF8 17             | 81239239                                               | 81241281            | + 1376        |        |
| protein_coding         | NADH:ubiquinone oxidoreductase complex assembly factor |                     |               |        |
| 8 [Source:HGNC         | Symbol;Acc:HGNC:33551]                                 | -                   | 548 713       | 499    |
| 308                    | 324 420                                                | 19.50252342         | 24.55260273   |        |
| 22.56259035            | 12.43782168                                            | 14.47351237         | 14.19259711   |        |
| ENSG00000136104        | 1278.316611                                            | 1311.562817         | 1332.215431   |        |
| 976.9182907            | 940.5892664                                            | 762.572916          | 1307.364953   |        |
| 893.3601577            | 0.550109959                                            | 0.00081188          | 0.010701447   |        |
| RNA5H2B                | 13 50909678                                            | 51024120            | + 26291       |        |
| protein_coding         | ribonuclease H2 subunit B [Source:HGNC                 |                     |               |        |
| Symbol;Acc:HGNC:25671] | -                                                      | 1409 1482           | 1146 943      | 824    |
| 884                    | 2.624415364                                            | 2.670960954         | 2.711966741   |        |
| 1.993042828            | 1.926493139                                            | 1.563421853         |               |        |
| ENSG00000245648        | 21.77402318                                            | 25.66485944         | 1.16249165    | 0      |
| 0                      | 0 16.20045809                                          | 0                   | 6.455356868   |        |
| 0.000815255            | 0.01073794                                             | AC022075.1          | 12 10363769   |        |
| 10398506               | + 2830                                                 | antisense           |               |        |
| uncharacterized        | LOC101928100 [Source:NCBI                              | gene;Acc:101928100] | -             |        |
| 24                     | 29 1                                                   | 0 0                 | 0 0.415291928 |        |
| 0.485554522            | 0.021984693                                            | 0                   | 0             |        |
| ENSG00000123374        | 1256.542588                                            | 1169.078597         | 1356.627755   |        |
| 958.2708578            | 837.8550019                                            | 791.0400045         | 1260.749647   |        |
| 862.3886214            | 0.547781281                                            | 0.000819436         | 0.010777534   | CDK2   |
| 12                     | 55966769                                               | 55972784            | + 3894        |        |
| protein_coding         | cyclin dependent kinase 2 [Source:HGNC                 |                     |               |        |
| Symbol;Acc:HGNC:1771]  | -                                                      | 1385 1321           | 1167 925      | 734    |
| 917                    | 17.41736727                                            | 16.07434596         | 18.64583151   |        |
| 13.1995106             | 11.58637213                                            | 10.94975512         |               |        |
| ENSG00000242372        | 2825.179508                                            | 4577.194932         | 4293.081663   |        |
| 4893.91517             | 6154.923938                                            | 6870.919996         | 3898.485368   |        |
| 5973.253034            | -0.615789481                                           | 0.00081948          | 0.010777534   | EIF6   |
| 20                     | 35278911                                               | 35284985            | - 1631        |        |
| protein_coding         | eukaryotic translation initiation factor 6             |                     |               |        |
| [Source:HGNC           | Symbol;Acc:HGNC:6159]                                  | -                   | 3114 5172     | 3693   |
| 4724                   | 5392 7965                                              | 93.49606452         | 150.2557138   |        |
| 140.8744369            | 160.9414729                                            | 203.209161          | 227.0716089   |        |
| ENSG00000092978        | 635.0756762                                            | 654.8964133         | 687.0325651   |        |
| 951.0190783            | 885.7976587                                            | 1132.645066         | 659.0015515   |        |
| 989.8206011            | -0.58803621                                            | 0.00082363          | 0.010824068   |        |
| GPATCH2 1              | 217426992                                              | 217631082           | - 8833        |        |





|                           |                                                        |             |             |                  |        |
|---------------------------|--------------------------------------------------------|-------------|-------------|------------------|--------|
|                           | 33.56182075                                            | 38.63053271 | 29.13895702 | 26.81659576      |        |
|                           | 26.07661446                                            |             |             |                  |        |
| ENSG00000185033           | 798.3808501                                            |             | 710.651108  | 1880.91149       |        |
| 608.1135065               | 553.6235367                                            |             | 577.1055213 | 1129.981149      |        |
| 579.6141882               | 0.961804973                                            |             | 0.000846188 | 0.011059069      | SEMA4B |
| 15                        | 90160604                                               |             | 90229679    | + 7006           |        |
| protein_coding            | semaphorin 4B [Source:HGNC Symbol;Acc:HGNC:10730]      |             |             |                  |        |
| -                         | 880 803                                                |             | 1618 587    | 485 669          |        |
| 6.150936205               | 5.430900588                                            |             | 14.36862568 | 4.655646658      |        |
| 4.255190089               | 4.440041229                                            |             |             |                  |        |
| ENSG00000144283           | 1361.7837                                              |             | 1054.914223 | 1179.929025      |        |
| 834.9906069               | 831.0060509                                            |             | 770.3366674 | 1198.875649      |        |
| 812.1111084               | 0.562286218                                            |             | 0.000846514 | 0.011059069      | PKP4   |
| 2                         | 158456964                                              |             | 158682879   | + 9525           |        |
| protein_coding            | plakophilin 4 [Source:HGNC Symbol;Acc:HGNC:9026]       |             |             |                  |        |
| -                         | 1501 1192                                              |             | 1015 806    | 728 893          |        |
| 7.716926991               | 5.929768134                                            |             | 6.629914145 | 4.70199433       |        |
| 4.698008034               | 4.359307379                                            |             |             |                  |        |
| ENSG00000148513           | 64.41481858                                            |             | 60.17967041 | 134.8490314      |        |
| 33.15099184               | 19.40536108                                            |             | 7.763751407 | 86.48117346      |        |
| 20.10670144               | 2.109842819                                            |             | 0.000849288 | 0.011087121      |        |
| ANKRD30A                  | 10 37125788                                            |             | 37384111    | + 5015           |        |
| protein_coding            | ankyrin repeat domain 30A [Source:HGNC                 |             |             |                  |        |
| Symbol;Acc:HGNC:17234]    | Others                                                 | 71          | 68          | 116 32           | 17     |
| 9                         | 0.69329185                                             |             | 0.642487106 | 1.439109693      |        |
| 0.354561099               | 0.208365275                                            |             | 0.083445436 |                  |        |
| ENSG00000181284           | 219.5547338                                            |             | 263.7285556 | 289.4604208      |        |
| 317.0063594               | 555.9065203                                            |             | 571.929687  | 257.5812367      |        |
| 481.6141889               | -0.904235757                                           |             | 0.000855502 | 0.011160011      |        |
| TMEM102 17                | 7435443 7437679                                        |             | + 2129      | protein_coding   |        |
| transmembrane protein 102 | [Source:HGNC Symbol;Acc:HGNC:26722] -                  |             |             |                  |        |
| 242 298 249               |                                                        | 306         | 487         | 663 5.566322799  |        |
| 6.632343997               | 7.276634016                                            |             | 7.98652414  | 14.06049661      |        |
| 14.48001078               |                                                        |             |             |                  |        |
| ENSG00000105974           | 9276.641127                                            |             | 8774.726943 | 11051.80812      |        |
| 8058.798922               | 6648.048407                                            |             | 5079.218699 | 9701.058729      |        |
| 6595.355343               | 0.556746179                                            |             | 0.000859134 | 0.011199134      | CAV1   |
| 7                         | 116524785                                              |             | 116561184   | + 4082           |        |
| protein_coding            | caveolin 1 [Source:HGNC Symbol;Acc:HGNC:1527] -        |             |             |                  |        |
| 10225                     | 9915 9507                                              |             | 7779 5824   | 5888 122.6645302 |        |
| 115.0922708               | 144.9029877                                            |             | 105.891918  | 87.69921907      |        |
| 67.06961588               |                                                        |             |             |                  |        |
| ENSG00000166847           | 1894.340017                                            |             | 2001.859036 | 1836.736807      |        |
| 2429.346121               | 2560.366171                                            |             | 2930.384837 | 1910.97862       |        |
| 2640.032376               | -0.466338955                                           |             | 0.000860629 | 0.011210356      | DCTN5  |
| 16                        | 23641392                                               |             | 23677455    | + 12740          |        |
| protein_coding            | dynactin subunit 5 [Source:HGNC Symbol;Acc:HGNC:24594] |             |             |                  |        |
| -                         | 2088 2262                                              |             | 1580 2345   | 2243 3397        |        |
| 8.025826183               | 8.412975291                                            |             | 7.716040625 | 10.2278762       |        |
| 10.82199193               | 12.39815715                                            |             |             |                  |        |

|                                     |                                                       |             |             |                  |
|-------------------------------------|-------------------------------------------------------|-------------|-------------|------------------|
| ENSG0000054654                      | 976.2020394                                           | 704.4561419 | 919.5308951 |                  |
| 626.7609394                         | 507.9638635                                           | 273.4565774 | 866.7296921 |                  |
| 469.3937934                         | 0.886186804                                           | 0.000865769 | 0.01126901  | SYNE2            |
| 14                                  | 63852983                                              | 64226433    | + 31374     |                  |
| protein_coding                      | spectrin repeat containing nuclear envelope protein 2 |             |             |                  |
| [Source:HGNC Symbol;Acc:HGNC:17084] | -                                                     | 1076        | 796         | 791              |
| 605                                 | 445                                                   | 317         | 1.679465406 | 1.202180326      |
| 1.568604433                         | 1.071513201                                           | 0.871841382 | 0.469807979 |                  |
| ENSG00000135046                     | 7759.717512                                           | 7789.727338 | 8438.526887 |                  |
| 6626.054493                         | 5641.252615                                           | 5699.456172 | 7995.990579 |                  |
| 5988.921093                         | 0.416918368                                           | 0.000868151 | 0.011291708 | ANXA1            |
| 9                                   | 73151757                                              | 73170393    | + 4561      |                  |
| protein_coding                      | annexin A1 [Source:HGNC Symbol;Acc:HGNC:533]          |             |             | -                |
| 8553                                | 8802                                                  | 7259        | 6396        | 4942             |
| 91.44242459                         | 99.02014792                                           | 77.92206021 | 6607        | 91.83052841      |
| 67.35583939                         |                                                       |             | 66.60242299 |                  |
| ENSG00000285106                     | 61.69306569                                           | 65.48964133 | 49.98714095 |                  |
| 113.9565344                         | 144.9694622                                           | 177.7036433 | 59.05661599 |                  |
| 145.5432133                         | -1.299596007                                          | 0.000879926 | 0.011436454 |                  |
| AC016831.6                          | 7                                                     | 130791264   | 131110161   | - 11088          |
| lincRNA                             | novel transcript                                      |             | -           | 68 74 43         |
| 110                                 | 127                                                   | 206         | 0.300320086 | 0.316231365      |
| 0.241280423                         | 0.551253692                                           | 0.704040859 | 0.863863294 |                  |
| ENSG00000129103                     | 1677.507036                                           | 1738.130481 | 2075.047595 |                  |
| 1336.399358                         | 1272.763388                                           | 1266.354118 | 1830.228371 |                  |
| 1291.838955                         | 0.502073059                                           | 0.000882975 | 0.011467658 | SUMF2            |
| 7                                   | 56064002                                              | 56080670    | + 4101      |                  |
| protein_coding                      | sulfatase modifying factor 2 [Source:HGNC             |             |             |                  |
| Symbol;Acc:HGNC:20415]              | -                                                     | 1849        | 1964        | 1785 1290 1115   |
| 1468                                | 22.0788183                                            | 22.69228111 | 27.08041389 |                  |
| 17.47881496                         | 16.71215513                                           | 16.64436781 |             |                  |
| ENSG0000050438                      | 273.0825408                                           | 108.8544038 | 145.3114562 |                  |
| 95.30910153                         | 36.5277385                                            | 16.39014186 | 175.7494669 |                  |
| 49.40899396                         | 1.835007128                                           | 0.000884684 | 0.011481421 | SLC4A8           |
| 12                                  | 51391317                                              | 51515763    | + 17980     |                  |
| protein_coding                      | solute carrier family 4 member 8 [Source:HGNC         |             |             |                  |
| Symbol;Acc:HGNC:11034]              | -                                                     | 301         | 123         | 125 92 32        |
| 19                                  | 0.819795428                                           | 0.324146894 | 0.432540893 |                  |
| 0.284321815                         | 0.109397564                                           | 0.049135449 |             |                  |
| ENSG00000153140                     | 210.4822241                                           | 266.3835411 | 269.6980628 |                  |
| 164.7189907                         | 92.46083808                                           | 76.77487503 | 248.8546093 |                  |
| 111.3182346                         | 1.161927364                                           | 0.000886732 | 0.011499556 | CETN3            |
| 5                                   | 90392261                                              | 90409786    | - 3106      |                  |
| protein_coding                      | centrin 3 [Source:HGNC Symbol;Acc:HGNC:1868]          |             |             | -                |
| 232                                 | 301                                                   | 232         | 159         | 81 89 3.65776009 |
| 4.591890097                         | 4.647221579                                           | 2.844511648 | 1.602990423 |                  |
| 1.332353826                         |                                                       |             |             |                  |
| ENSG00000134815                     | 1069.648889                                           | 1141.643748 | 869.5437541 |                  |
| 1358.154697                         | 1439.421195                                           | 1900.393817 | 1026.945464 |                  |
| 1565.989903                         | -0.608501128                                          | 0.000893236 | 0.01157542  | DHX34            |

|                                 |                                                        |             |         |                  |      |                     |
|---------------------------------|--------------------------------------------------------|-------------|---------|------------------|------|---------------------|
| 19                              | 47349281                                               | 47382704    | +       | 5696             |      |                     |
| protein_coding                  | DExH-box helicase 34 [Source:HGNC                      |             |         |                  |      |                     |
| Symbol;Acc:HGNC:16719]          | -                                                      | 1179        | 1290    | 748              | 1311 | 1261                |
| 2203                            | 10.13613784                                            | 10.73114765 |         | 8.170308662      |      |                     |
| 12.78924051                     | 13.60794252                                            | 17.98355447 |         |                  |      |                     |
| ENSG0000007968                  | 716.7282631                                            | 659.3213891 |         | 631.2329659      |      |                     |
| 452.7182323                     | 267.1090878                                            | 449.4349426 |         | 669.094206       |      |                     |
| 389.7540876                     | 0.77807465                                             | 0.000901787 |         | 0.011677685      |      | E2F2                |
| 1                               | 23506430                                               | 23531220    |         | -                | 5457 |                     |
| protein_coding                  | E2F transcription factor 2 [Source:HGNC                |             |         |                  |      |                     |
| Symbol;Acc:HGNC:3114]           | E2F                                                    | 790         | 745     | 543              | 437  | 234                 |
| 521                             | 7.089274962                                            | 6.468875009 |         | 6.190884795      |      |                     |
| 4.449790114                     | 2.635780641                                            | 4.439302993 |         |                  |      |                     |
| ENSG00000189043                 | 2686.37011                                             | 3406.346344 |         | 3836.222445      |      |                     |
| 2468.712923                     | 2228.192049                                            | 2229.059293 |         | 3309.6463        |      |                     |
| 2308.654755                     | 0.519322408                                            | 0.000911444 |         | 0.0117941        |      | NDUFA4              |
| 7                               | 10931951                                               | 10940256    |         | -                | 3556 |                     |
| protein_coding                  | "NDUFA4, mitochondrial complex associated [Source:HGNC |             |         |                  |      |                     |
| Symbol;Acc:HGNC:7687]"          | -                                                      | 2961        | 3849    | 3300             | 2383 | 1952                |
| 2584                            | 40.77606742                                            | 51.28762632 |         | 57.73764078      |      |                     |
| 37.2369699                      | 33.74158047                                            | 33.78794473 |         |                  |      |                     |
| ENSG0000041802                  | 2028.61316                                             | 2321.342287 |         | 1579.826152      |      |                     |
| 2564.022025                     | 2906.238195                                            | 3286.654763 |         | 1976.593866      |      |                     |
| 2918.971661                     | -0.561978501                                           | 0.000913163 |         | 0.011807635      |      | LSG1                |
| 3                               | 194640788                                              | 194672477   |         | -                | 4818 |                     |
| protein_coding                  | large 60S subunit nuclear export GTPase 1 [Source:HGNC |             |         |                  |      |                     |
| Symbol;Acc:HGNC:25652]          | -                                                      | 2236        | 2623    | 1359             | 2475 | 2546                |
| 3810                            | 22.72655912                                            | 25.7963307  |         | 17.54928826      |      |                     |
| 28.54436928                     | 32.48171593                                            | 36.76962479 |         |                  |      |                     |
| ENSG00000096080                 | 449.0892282                                            | 512.4121937 |         | 462.6716767      |      |                     |
| 632.9767504                     | 812.7421817                                            | 775.5125017 |         | 474.7243662      |      |                     |
| 740.4104779                     | -0.640882238                                           | 0.000913825 |         | 0.011807635      |      |                     |
| MRPS18A 6                       | 43671303                                               | 43687791    |         | -                | 1284 |                     |
| protein_coding                  | mitochondrial ribosomal protein S18A [Source:HGNC      |             |         |                  |      |                     |
| Symbol;Acc:HGNC:14515]          | -                                                      | 495         | 579     | 398              | 611  | 712                 |
| 899                             | 18.87855975                                            | 21.3668244  |         | 19.28523321      |      |                     |
| 26.44163039                     | 34.08492401                                            | 32.55559867 |         |                  |      |                     |
| ENSG00000275966                 | 10.88701159                                            | 17.69990306 |         | 12.78740815      |      | 0                   |
| 0                               | 0                                                      | 13.79144093 |         | 0                |      |                     |
| 0.000916987                     | 0.011839847                                            | AC110285.6  |         | 17               |      | 81345476            |
| 81345966                        | -                                                      | 491         | lincRNA | novel transcript |      |                     |
| -                               | 12                                                     | 20          | 11      | 0                | 0    |                     |
| 1.196818896                     | 1.930078373                                            | 1.39385642  |         | 0                | 0    | 0                   |
| ENSG00000085644                 | 365.6221393                                            | 417.7177123 |         | 446.3967936      |      |                     |
| 545.9553968                     | 751.1016229                                            | 690.1112362 |         | 409.912215       |      |                     |
| 662.3894187                     | -0.693020351                                           | 0.000918655 |         | 0.011852728      |      | ZNF213              |
| 16                              | 3129777                                                | 3142805     | +       | 6443             |      | protein_coding zinc |
| finger protein 213 [Source:HGNC | Symbol;Acc:HGNC:13005]                                 |             | zf-C2H2 | 403              |      |                     |
| 472                             | 384                                                    | 527         | 658     | 800              |      | 3.062990137         |
| 3.471205363                     | 3.708087209                                            | 4.545006697 |         | 6.277476889      |      |                     |

5.773416297

|                 |                                                                     |             |             |                |                 |
|-----------------|---------------------------------------------------------------------|-------------|-------------|----------------|-----------------|
| ENSG00000125735 | 0                                                                   | 1.769990306 | 2.3249833   | 10.35968495    |                 |
|                 | 42.23519764                                                         | 23.29125422 | 1.364991202 | 25.29537894    |                 |
|                 | -4.249062868                                                        | 0.000921891 | 0.011885806 | TNFSF14        | 19              |
|                 | 6661253                                                             | 6670588     | -           | 4778           | protein_coding  |
|                 |                                                                     |             |             |                | TNF             |
|                 | superfamily member 14 [Source:HGNC Symbol;Acc:HGNC:11930]           |             |             |                | -               |
|                 | 0                                                                   | 2           | 2           | 10             | 37              |
|                 |                                                                     |             |             | 27             | 0               |
| 0.019833999     | 0.026042981                                                         | 0.1162963   | 0.475995601 |                |                 |
| 0.262753577     |                                                                     |             |             |                |                 |
| ENSG00000078269 | 2456.835616                                                         | 2129.298338 | 2777.192552 |                |                 |
| 1758.038536     | 1877.754057                                                         | 1454.40943  | 2454.442169 |                |                 |
| 1696.734008     | 0.532795018                                                         | 0.000923369 | 0.01188978  | SYNJ2          |                 |
|                 | 6                                                                   | 157981887   | 158099176   | +              | 12493           |
|                 | protein_coding synaptojanin 2 [Source:HGNC Symbol;Acc:HGNC:11504]   |             |             |                |                 |
|                 | -                                                                   | 2708        | 2406        | 2389           | 1697            |
|                 |                                                                     |             |             | 1645           | 1686            |
| 10.61477037     | 9.125471726                                                         | 11.89751487 | 7.547917524 |                |                 |
| 8.093689184     | 6.2751173                                                           |             |             |                |                 |
| ENSG00000283787 | 35.38278767                                                         | 47.78973827 | 43.01219105 | 0              |                 |
|                 | 10.27342645                                                         | 0           | 42.06157233 | 3.424475485    |                 |
| 3.67366869      | 0.000923543                                                         | 0.01188978  | PRR33       | 11             |                 |
| 1888577         | 1891895                                                             | -           | 3319        | protein_coding | proline rich 33 |
|                 | [Source:HGNC Symbol;Acc:HGNC:35118]                                 |             |             |                | -               |
|                 | 0                                                                   | 9           | 0           | 0.575421438    | 0.770926453     |
| 0.693587597     | 0                                                                   | 0.166679664 | 0           |                |                 |
| ENSG00000064601 | 1550.491901                                                         | 1763.79534  | 1782.099699 |                |                 |
| 1253.521879     | 1256.782503                                                         | 1089.513114 | 1698.795647 |                |                 |
| 1199.939165     | 0.501855875                                                         | 0.000924237 | 0.011890055 | CTSA           |                 |
|                 | 20                                                                  | 45890144    | 45898820    | +              | 5856            |
|                 | protein_coding cathepsin A [Source:HGNC Symbol;Acc:HGNC:9251]       |             |             |                | -               |
|                 | 1709                                                                | 1993        | 1533        | 1210           | 1101            |
|                 |                                                                     |             |             | 1263           | 14.29123229     |
|                 | 16.12622339                                                         | 16.28725641 | 11.48143961 | 11.55669392    |                 |
|                 | 10.02843816                                                         |             |             |                |                 |
| ENSG00000197747 | 2619.233539                                                         | 3409.886325 | 5063.813627 |                |                 |
| 2124.771383     | 2832.041226                                                         | 1703.712114 | 3697.644497 |                |                 |
| 2220.174908     | 0.736002596                                                         | 0.000927589 | 0.011924504 |                |                 |
| S100A10         | 1                                                                   | 151982915   | 151994390   | -              | 1543            |
|                 | protein_coding S100 calcium binding protein A10 [Source:HGNC        |             |             |                |                 |
|                 | Symbol;Acc:HGNC:10487]                                              |             |             |                | -               |
|                 | 1975                                                                | 91.62406195 | 118.3203713 | 4356           | 2051            |
|                 |                                                                     |             |             | 175.642169     | 2481            |
| 73.86042086     | 98.83441554                                                         | 59.51578854 |             |                |                 |
| ENSG00000100083 | 1045.153113                                                         | 1208.018384 | 863.7312959 |                |                 |
| 1223.478792     | 1763.604875                                                         | 1934.899379 | 1038.967598 |                |                 |
| 1640.661015     | -0.658616894                                                        | 0.000930762 | 0.01195661  | GGA1           |                 |
|                 | 22                                                                  | 37608475    | 37633564    | +              | 9369            |
|                 | protein_coding "golgi associated, gamma adaptin ear containing, ARF |             |             |                |                 |
|                 | binding protein 1 [Source:HGNC Symbol;Acc:HGNC:17842]"              |             |             |                | -               |
|                 | 1365                                                                | 743         | 1181        | 1545           | 2243            |
|                 |                                                                     |             |             | 6.02126753     | 1152            |
| 6.903444747     | 4.934037222                                                         | 7.00436392  | 10.1363735  |                |                 |
| 11.13184249     |                                                                     |             |             |                |                 |
| ENSG00000138160 | 2406.029562                                                         | 1867.339773 | 2477.269706 |                |                 |

|                         |                                                        |             |                          |             |
|-------------------------|--------------------------------------------------------|-------------|--------------------------|-------------|
| 1216.227013             | 647.2258666                                            | 402.8524341 | 2250.213014              |             |
| 755.4351046             | 1.574897861                                            | 0.000932878 | 0.011975094              | KIF11       |
| 10                      | 92593286                                               | 92655395    | + 4860                   |             |
| protein_coding          | kinesin family member 11 [Source:HGNC                  |             |                          |             |
| Symbol;Acc:HGNC:6388]   | -                                                      | 2652 2110   | 2131 1174                | 567         |
| 467                     | 26.72181383                                            | 20.57181579 | 27.28060686              |             |
| 13.42282324             | 7.171238226                                            | 4.467984208 |                          |             |
| ENSG00000269974         | 17.23776835                                            | 29.20484005 | 1.16249165               | 0           |
| 0                       | 0                                                      | 15.86836669 | 0                        | 6.425561622 |
| 0.000936226             | 0.01200935                                             | AC091057.4  | 15                       | 30648797    |
| 30649529                | +                                                      | 733         | lincRNA novel transcript |             |
| -                       | 19 33                                                  | 1 0         | 0 0                      |             |
| 1.269341005             | 2.13322373                                             | 0.084879512 | 0 0                      | 0           |
| ENSG00000162396         | 290.3203091                                            | 267.2685362 | 276.6730127              |             |
| 387.4522171             | 442.8988293                                            | 646.1166449 | 278.087286               |             |
| 492.1558971             | -0.825001427                                           | 0.000939788 | 0.012046317              | PARS2       |
| 1                       | 54756898                                               | 54764514    | - 2347                   |             |
| protein_coding          | "prolyl-tRNA synthetase 2, mitochondrial [Source:HGNC  |             |                          |             |
| Symbol;Acc:HGNC:30563]" | -                                                      | 320 302     | 238 374                  | 388         |
| 749                     | 6.676757029                                            | 6.097057548 | 6.309147983              |             |
| 8.854632809             | 10.16169127                                            | 14.83883297 |                          |             |
| ENSG00000105193         | 17901.87606                                            | 22628.44107 | 24151.92652              |             |
| 26928.96506             | 31586.22038                                            | 30492.56497 | 21560.74788              |             |
| 29669.25014             | -0.460606108                                           | 0.000953447 | 0.012204591              | RPS16       |
| 19                      | 39433207                                               | 39435948    | - 2603                   |             |
| protein_coding          | ribosomal protein S16 [Source:HGNC                     |             |                          |             |
| Symbol;Acc:HGNC:10396]  | -                                                      | 19732 25569 | 20776 25994              | 27671       |
| 35348                   | 371.2150901                                            | 465.4424778 | 496.5861642              |             |
| 554.8952282             | 653.4284604                                            | 631.4248887 |                          |             |
| ENSG00000135829         | 8421.103466                                            | 7438.384262 | 8120.004174              |             |
| 6774.197988             | 5498.566136                                            | 5207.751916 | 7993.163968              |             |
| 5826.83868              | 0.456103681                                            | 0.000953516 | 0.012204591              | DHX9        |
| 1                       | 182839369                                              | 182887751   | + 5645                   |             |
| protein_coding          | DExH-box helicase 9 [Source:HGNC Symbol;Acc:HGNC:2750] |             |                          |             |
| -                       | 9282 8405                                              | 6985 6539   | 4817 6037                |             |
| 80.52047003             | 70.5505189                                             | 76.98556666 | 64.36643186              |             |
| 52.45175938             | 49.72654067                                            |             |                          |             |
| ENSG00000205208         | 929.0249892                                            | 894.7300998 | 878.8436873              |             |
| 726.2139149             | 493.1244698                                            | 458.061333  | 900.8662588              |             |
| 559.1332392             | 0.688746754                                            | 0.000954753 | 0.012211582              |             |
| C4orf46 4               | 158666679                                              | 158672255   | - 3730                   |             |
| protein_coding          | chromosome 4 open reading frame 46 [Source:HGNC        |             |                          |             |
| Symbol;Acc:HGNC:27320]  | -                                                      | 1024 1011   | 756 701                  | 432         |
| 531                     | 13.44373083                                            | 12.84306749 | 12.61013716              |             |
| 10.44290266             | 7.119053803                                            | 6.619370763 |                          |             |
| ENSG00000213551         | 1202.10753                                             | 1208.903379 | 1025.317635              |             |
| 750.0411903             | 852.6943956                                            | 746.1827742 | 1145.442848              |             |
| 782.9727867             | 0.549996316                                            | 0.000956313 | 0.012222697              | DNAJC9      |
| 10                      | 73183362                                               | 73248862    | - 3955                   |             |
| protein_coding          | DnaJ heat shock protein family (Hsp40) member C9       |             |                          |             |

|                                                       |              |              |             |             |
|-------------------------------------------------------|--------------|--------------|-------------|-------------|
| [Source:HGNC Symbol;Acc:HGNC:19123]                   | -            | 1325         | 1366        | 882         |
| 724                                                   | 747          | 865          | 16.40582498 | 16.36555177 |
| 13.87487068                                           | 10.17194778  | 11.60971274  | 10.16952429 |             |
| ENSG00000240875                                       | 2.721752898  | 0            | 1.16249165  | 15.53952742 |
|                                                       | 22.82983656  | 34.50556181  | 1.294748183 | 24.29164193 |
|                                                       | -4.231483327 | 0.000958667  | 0.01224394  | LINC00886   |
| 3                                                     | 156747346    | 156817062    | -           | 3822        |
| lincRNA long intergenic non-protein coding RNA        | 886          | [Source:HGNC |             |             |
| Symbol;Acc:HGNC:48572]                                | -            | 3            | 0           | 1           |
| 40                                                    | 0.038437865  | 0            | 0.016278567 | 0.218078384 |
|                                                       | 0.321652309  | 0.486631622  |             |             |
| ENSG00000102144                                       | 24993.85686  | 30140.27993  | 34893.34936 |             |
| 39485.93918                                           | 47597.92625  | 38746.29536  | 30009.16205 |             |
| 41943.38693                                           | -0.48306311  | 0.000960921  | 0.012263872 | PGK1        |
| X                                                     | 77910739     | 78129296     | +           | 5512        |
| protein_coding phosphoglycerate kinase 1              | [Source:HGNC |              |             |             |
| Symbol;Acc:HGNC:8896]                                 | -            | 27549        | 34057       | 30016       |
| 44916                                                 | 244.7514727  | 292.7680104  | 338.805502  | 38115       |
| 384.2366249                                           | 465.0004533  | 378.8984969  |             | 41698       |
| ENSG00000175575                                       | 547.9795835  | 507.1022227  | 544.0460921 |             |
| 661.9838682                                           | 928.0328563  | 920.4358613  | 533.0426328 |             |
| 836.8175286                                           | -0.650988053 | 0.000961695  | 0.012264903 | PAAF1       |
| 11                                                    | 73876699     | 73931124     | +           | 7937        |
| protein_coding proteasomal ATPase associated factor 1 | [Source:HGNC |              |             |             |
| Symbol;Acc:HGNC:25687]                                | -            | 604          | 573         | 468         |
| 1067                                                  | 3.726569643  | 3.420776362  | 3.668565853 | 639         |
| 4.473593529                                           | 6.296243645  | 6.25084971   |             | 813         |
| ENSG00000161692                                       | 436.3877146  | 423.9126783  | 466.1591516 |             |
| 272.4597142                                           | 278.5240061  | 256.2037964  | 442.1531815 |             |
| 269.0625056                                           | 0.716743287  | 0.000966066  | 0.012311778 | DBF4B       |
| 17                                                    | 44708608     | 44752264     | +           | 7146        |
| protein_coding DBF4 zinc finger B                     | [Source:HGNC |              |             |             |
| Symbol;Acc:HGNC:17883]                                | -            | 481          | 479         | 401         |
| 3.296178696                                           | 3.176134918  | 3.491308352  | 2.045054001 | 263         |
| 2.098815074                                           | 1.93252204   |              |             | 244         |
| ENSG00000198933                                       | 198.6879615  | 251.3386235  | 224.3608884 | 297         |
| 300.4308635                                           | 426.9179437  | 514.99551    | 224.7958245 |             |
| 414.1147724                                           | -0.882186602 | 0.000975734  | 0.012426027 | TBKBP1      |
| 17                                                    | 47694081     | 47712050     | +           | 4280        |
| protein_coding TBK1 binding protein 1                 | [Source:HGNC |              |             |             |
| Symbol;Acc:HGNC:30140]                                | -            | 219          | 284         | 193         |
| 597                                                   | 2.505699748  | 3.144133746  | 2.805565333 | 290         |
| 3.765011201                                           | 5.371247857  | 6.485770548  |             | 374         |
| ENSG00000111961                                       | 1045.153113  | 803.575599   | 863.7312959 |             |
| 624.6890024                                           | 619.8300627  | 365.7589552  | 904.1533359 |             |
| 536.7593401                                           | 0.754108643  | 0.000978825  | 0.012456433 | SASH1       |
| 6                                                     | 148272304    | 148552050    | +           | 11143       |
| protein_coding SAM and SH3 domain containing 1        | [Source:HGNC |              |             |             |
| Symbol;Acc:HGNC:19182]                                | -            | 1152         | 908         | 743         |
| 424                                                   | 5.062663151  | 3.86109208   | 4.148523264 | 603         |
|                                                       |              |              |             | 543         |

|                                                     |                                                        |             |                |        |  |
|-----------------------------------------------------|--------------------------------------------------------|-------------|----------------|--------|--|
| 3.006957053                                         | 2.995332642                                            | 1.769272569 |                |        |  |
| ENSG00000089289                                     | 1155.837731                                            | 1059.339198 | 1413.589846    |        |  |
| 1757.002567                                         | 1624.342871                                            | 1875.377284 | 1209.588925    |        |  |
| 1752.240908                                         | -0.535919286                                           | 0.000985127 | 0.012520838    | IGBP1  |  |
| X                                                   | 70133449                                               | 70166324    | + 1862         |        |  |
| protein_coding                                      | immunoglobulin binding protein 1 [Source:HGNC          |             |                |        |  |
| Symbol;Acc:HGNC:5461]                               | -                                                      | 1274 1197   | 1216 1696      | 1423   |  |
| 2174                                                | 33.50567988                                            | 30.46077261 | 40.63130253    |        |  |
| 50.61254955                                         | 46.9756268                                             | 54.28887989 |                |        |  |
| ENSG00000107159                                     | 802.0098539                                            | 1432.807153 | 1443.814629    |        |  |
| 1517.693845                                         | 2349.190182                                            | 2305.834168 | 1226.210545    |        |  |
| 2057.572732                                         | -0.747211787                                           | 0.000985302 | 0.012520838    | CA9    |  |
| 9                                                   | 35673856                                               | 35681159    | + 1670         |        |  |
| protein_coding                                      | carbonic anhydrase 9 [Source:HGNC                      |             |                |        |  |
| Symbol;Acc:HGNC:1383]                               | -                                                      | 884 1619    | 1242 1465      | 2058   |  |
| 2673                                                | 25.92175953                                            | 45.93638536 | 46.27132877    |        |  |
| 48.74535046                                         | 75.74888761                                            | 74.4240853  |                |        |  |
| ENSG00000154277                                     | 4436.457224                                            | 5202.886505 | 4084.995658    |        |  |
| 5924.703822                                         | 6086.434428                                            | 6731.17247  | 4574.779796    |        |  |
| 6247.436907                                         | -0.449417818                                           | 0.000986642 | 0.012528868    | UCHL1  |  |
| 4                                                   | 41256413                                               | 41268455    | + 2282         |        |  |
| protein_coding                                      | ubiquitin C-terminal hydrolase L1 [Source:HGNC         |             |                |        |  |
| Symbol;Acc:HGNC:12513]                              | -                                                      | 4890 5879   | 3514 5719      | 5332   |  |
| 7803                                                | 104.9353711                                            | 122.0714943 | 95.80605634    |        |  |
| 139.2568285                                         | 143.6222946                                            | 158.9926269 |                |        |  |
| ENSG00000105877                                     | 103.4266101                                            | 84.9595347  | 95.32431529    |        |  |
| 159.5391482                                         | 237.4303003                                            | 206.1707318 | 94.57015337    |        |  |
| 201.0467268                                         | -1.087889301                                           | 0.000989322 | 0.01255389     | DNAH11 |  |
| 7                                                   | 21543215                                               | 21901839    | + 15998        |        |  |
| protein_coding                                      | dynein axonemal heavy chain 11 [Source:HGNC            |             |                |        |  |
| Symbol;Acc:HGNC:2942]                               | -                                                      | 114 96      | 82 154         | 208    |  |
| 239                                                 | 0.348953728                                            | 0.284336086 | 0.318900358    |        |  |
| 0.534893194                                         | 0.799180728                                            | 0.6946455   |                |        |  |
| ENSG00000171792                                     | 668.6439619                                            | 511.5271985 | 638.2079158    |        |  |
| 461.0059802                                         | 303.6368263                                            | 215.6597613 | 606.1263587    |        |  |
| 326.7675226                                         | 0.892522492                                            | 0.000990695 | 0.012562294    | RHN01  |  |
| 12                                                  | 2876258 2889523                                        | + 2643      | protein_coding | RAD9-  |  |
| HUS1-RAD1 interacting nuclear orphan 1 [Source:HGNC |                                                        |             |                |        |  |
| Symbol;Acc:HGNC:28206]                              | -                                                      | 737 578     | 549 445        | 266    |  |
| 250                                                 | 13.65522965                                            | 10.36232278 | 12.92355597    |        |  |
| 9.355669932                                         | 6.186312204                                            | 4.398188753 |                |        |  |
| ENSG00000119013                                     | 329.3321007                                            | 429.2226493 | 427.7969272    |        |  |
| 264.1719662                                         | 211.1759882                                            | 188.9179509 | 395.450559     |        |  |
| 221.4219684                                         | 0.83715082                                             | 0.000995194 | 0.012597352    | NDUFB3 |  |
| 2                                                   | 201071433                                              | 201085750   | + 1103         |        |  |
| protein_coding                                      | NADH:ubiquinone oxidoreductase subunit B3 [Source:HGNC |             |                |        |  |
| Symbol;Acc:HGNC:7698]                               | -                                                      | 363 485     | 368 255        | 185    |  |
| 219                                                 | 16.11609416                                            | 20.83495981 | 20.75769626    |        |  |
| 12.84626012                                         | 10.3096418                                             | 9.232081304 |                |        |  |
| ENSG00000161618                                     | 1198.478526                                            | 1161.998636 | 1418.239813    |        |  |

|                                                               |              |             |             |             |             |
|---------------------------------------------------------------|--------------|-------------|-------------|-------------|-------------|
| 594.6459161                                                   | 874.3827404  | 935.1007251 | 1259.572325 |             |             |
| 801.3764605                                                   | 0.651508918  | 0.000995381 | 0.012597352 |             |             |
| ALDH16A1                                                      | 19           | 49453169    | 49471048    | +           | 4643        |
| protein_coding aldehyde dehydrogenase 16 family member A1     |              |             |             |             |             |
| [Source:HGNC Symbol;Acc:HGNC:28114]                           |              |             |             |             |             |
|                                                               |              | -           | 1321        | 1313        | 1220        |
|                                                               | 574          | 766         | 1084        | 13.93262081 | 13.39962003 |
| 16.34812665                                                   | 6.869501969  | 10.14092209 | 10.85579458 |             |             |
| ENSG00000240583                                               | 150.6036604  | 83.18954439 | 254.5856713 |             |             |
| 32.11502334                                                   | 87.89487077  | 27.60444945 | 162.7929587 |             |             |
| 49.20478119                                                   | 1.731352617  | 0.000995968 | 0.012597352 |             | AQP1        |
|                                                               | 7            | 30911694    | 30925516    | +           | 3435        |
| protein_coding aquaporin 1 (Colton blood group) [Source:HGNC  |              |             |             |             |             |
| Symbol;Acc:HGNC:633]                                          |              |             |             |             |             |
|                                                               |              | -           | 166         | 94          | 219         |
|                                                               | 32           | 2.366519188 | 1.296664297 | 3.966653089 | 77          |
| 0.501472355                                                   | 1.377879834  | 0.433165895 |             |             |             |
| ENSG00000136541                                               | 49.89880313  | 53.09970919 | 60.44956579 |             |             |
| 152.2873688                                                   | 100.4512809  | 155.2750281 | 54.4826927  |             |             |
| 136.0045593                                                   | -1.323479243 | 0.000996308 | 0.012597352 |             | ERMN        |
|                                                               | 2            | 157318625   | 157327713   | -           | 4393        |
| protein_coding ermin [Source:HGNC Symbol;Acc:HGNC:29208]      |              |             |             |             |             |
|                                                               |              |             |             |             | -           |
|                                                               | 55           | 60          | 52          | 147         | 88          |
|                                                               | 0.647167185  | 0.7364597   | 1.859380085 | 1.231314033 |             |
|                                                               | 1.905207664  |             |             |             |             |
| ENSG00000163040                                               | 278.5260466  | 232.7537253 | 262.7231129 |             |             |
| 114.9925029                                                   | 118.7151501  | 161.3135015 | 258.0009616 |             |             |
| 131.6737182                                                   | 0.96737816   | 0.001009539 | 0.012755526 |             |             |
| CCDC74A 2                                                     | 131527675    | 131533666   | +           | 3077        |             |
| protein_coding coiled-coil domain containing 74A [Source:HGNC |              |             |             |             |             |
| Symbol;Acc:HGNC:25197]                                        |              |             |             |             |             |
|                                                               |              | -           | 307         | 263         | 226         |
|                                                               | 187          | 4.885843623 | 4.049996921 | 4.569701051 | 104         |
| 2.004506765                                                   | 2.077558221  | 2.825824124 |             |             |             |
| ENSG00000090432                                               | 1261.986094  | 1626.621091 | 1434.514696 |             |             |
| 1642.010064                                                   | 2536.394842  | 2408.488214 | 1441.040627 |             |             |
| 2195.63104                                                    | -0.607474934 | 0.001012198 | 0.012779992 |             | MUL1        |
|                                                               | 1            | 20499448    | 20508161    | -           | 2438        |
| protein_coding mitochondrial E3 ubiquitin protein ligase 1    |              |             |             |             |             |
| [Source:HGNC Symbol;Acc:HGNC:25762]                           |              |             |             |             |             |
|                                                               |              | -           | 1391        | 1838        | 1234        |
|                                                               | 1585         | 2222        | 2792        | 27.93972404 | 35.72220403 |
| 31.49113437                                                   | 36.12497947  | 56.02188446 | 53.24915627 |             |             |
| ENSG00000170144                                               | 7592.783334  | 7799.462284 | 8243.228289 |             |             |
| 6843.607877                                                   | 4982.61183   | 5116.312178 | 7878.491303 |             |             |
| 5647.510628                                                   | 0.480278053  | 0.001018769 | 0.012851608 |             |             |
| HNRNPA3 2                                                     | 177212563    | 177223958   | +           | 6033        |             |
| protein_coding heterogeneous nuclear ribonucleoprotein A3     |              |             |             |             |             |
| [Source:HGNC Symbol;Acc:HGNC:24941]                           |              |             |             |             |             |
|                                                               |              | -           | 8369        | 8813        | 7091        |
|                                                               | 6606         | 4365        | 5931        | 67.93114364 | 69.21765559 |
| 73.12754717                                                   | 60.84393416  | 44.4731901  | 45.71151517 |             |             |
| ENSG00000188342                                               | 1336.380673  | 1853.179851 | 1601.913494 |             |             |
| 1198.615549                                                   | 1023.91817   | 1021.36463  | 1597.158006 |             |             |
| 1081.299449                                                   | 0.562866822  | 0.001019323 | 0.012851608 |             | GTF2F2      |



|                                                                 |                                                        |             |             |             |                |
|-----------------------------------------------------------------|--------------------------------------------------------|-------------|-------------|-------------|----------------|
| 13                                                              | 45120515                                               | 45284909    | +           | 3619        |                |
| protein_coding                                                  | general transcription factor IIF subunit 2             |             |             |             |                |
| [Source:HGNC Symbol;Acc:HGNC:4653]                              |                                                        | -           | 1473        | 2094        | 1378           |
| 1157                                                            | 897                                                    | 1184        | 19.93163141 | 27.41665929 |                |
| 23.69013203                                                     | 17.76465671                                            | 15.23530736 | 15.21227394 |             |                |
| ENSG00000116774                                                 | 208.6677222                                            | 150.449176  | 282.4854709 |             |                |
| 118.1004084                                                     | 89.0363626                                             | 39.68139608 | 213.8674564 |             |                |
| 82.27272237                                                     | 1.381065356                                            | 0.001021258 | 0.012866829 |             | OLFML3         |
| 1                                                               | 113979391                                              | 114035572   | +           | 2821        |                |
| protein_coding                                                  | olfactomedin like 3 [Source:HGNC                       |             |             |             |                |
| Symbol;Acc:HGNC:24956]                                          | -                                                      | 230         | 170         | 243         | 114            |
| 46                                                              | 3.992578221                                            | 2.855434984 | 5.359324256 |             | 78             |
| 2.245503875                                                     | 1.699569296                                            | 0.758203463 |             |             |                |
| ENSG00000231079                                                 | 0                                                      | 5.309970919 | 3.48747495  | 25.89921237 |                |
| 21.68834474                                                     | 51.75834272                                            | 2.932481956 | 33.11529994 |             |                |
| -3.504850251                                                    | 0.001024944                                            | 0.012902342 | AC105402.3  |             |                |
| 2                                                               | 148866470                                              | 148888823   | -           | 4156        |                |
| antisense                                                       | novel transcript                                       |             | -           | 0           | 6              |
| 25                                                              | 19                                                     | 60          | 0           | 0.068407253 | 0.044910983    |
| 0.334253923                                                     | 0.28101236                                             | 0.67128467  |             |             |                |
| ENSG00000168653                                                 | 2485.867647                                            | 3216.957382 | 3367.73831  |             |                |
| 2045.001809                                                     | 2180.249392                                            | 2195.41637  | 3023.521113 |             |                |
| 2140.222524                                                     | 0.498169207                                            | 0.001026956 | 0.012902342 |             | NDUFS5         |
| 1                                                               | 39026318                                               | 39034636    | +           | 548         |                |
| protein_coding                                                  | NADH:ubiquinone oxidoreductase subunit S5 [Source:HGNC |             |             |             |                |
| Symbol;Acc:HGNC:7712]                                           | -                                                      | 2740        | 3635        | 2897        | 1974           |
| 2545                                                            | 244.8491992                                            | 314.3042818 | 328.9082623 |             | 1910           |
| 200.1606181                                                     | 214.2398073                                            | 215.9425603 |             |             |                |
| ENSG00000181458                                                 | 464.5124946                                            | 533.6520773 | 592.8707414 |             |                |
| 945.8392358                                                     | 728.2717864                                            | 799.666395  | 530.3451045 |             |                |
| 824.5924724                                                     | -0.637882182                                           | 0.001027036 | 0.012902342 |             |                |
| TMEM45A 3                                                       | 100492619                                              | 100577444   | +           | 6005        |                |
| protein_coding                                                  | transmembrane protein 45A [Source:HGNC                 |             |             |             |                |
| Symbol;Acc:HGNC:25480]                                          | -                                                      | 512         | 603         | 510         | 913            |
| 927                                                             | 4.175280265                                            | 4.75806906  | 5.284014625 |             | 638            |
| 8.448309379                                                     | 6.53062922                                             | 7.177905569 |             |             |                |
| ENSG00000175221                                                 | 2220.950365                                            | 2297.447417 | 2255.233801 |             |                |
| 2631.359977                                                     | 3199.601594                                            | 3888.776816 | 2257.877194 |             |                |
| 3239.912796                                                     | -0.521275825                                           | 0.001027465 | 0.012902342 |             | MED16          |
| 19                                                              | 867630                                                 | 893218      | -           | 4222        | protein_coding |
| mediator complex subunit 16 [Source:HGNC Symbol;Acc:HGNC:17556] |                                                        |             |             |             | -              |
| 2448                                                            | 2596                                                   | 1940        | 2540        | 2803        | 4508           |
| 29.13485761                                                     | 28.58843275                                            | 33.42931914 | 40.80865009 |             |                |
| 49.64742136                                                     |                                                        |             |             |             |                |
| ENSG00000065154                                                 | 1386.279476                                            | 1269.968045 | 1478.689379 |             |                |
| 1077.407235                                                     | 933.7403154                                            | 747.0454132 | 1378.3123   |             |                |
| 919.3976545                                                     | 0.584608781                                            | 0.001027723 | 0.012902342 |             | OAT            |
| 10                                                              | 124397303                                              | 124418976   | -           | 3388        |                |
| protein_coding                                                  | ornithine aminotransferase [Source:HGNC                |             |             |             |                |
| Symbol;Acc:HGNC:8091]                                           | -                                                      | 1528        | 1435        | 1272        | 1040           |
|                                                                 |                                                        |             |             |             | 818            |

|                                      |                                                       |             |                 |        |
|--------------------------------------|-------------------------------------------------------|-------------|-----------------|--------|
| 866                                  | 22.08557121                                           | 20.06942548 | 23.35880151     |        |
| 17.05697376                          | 14.84079828                                           | 11.88517302 |                 |        |
| ENSG00000160813                      | 420.0571972                                           | 394.7078383 | 455.6967268     |        |
| 278.6755251                          | 194.0536108                                           | 259.6543526 | 423.4872541     |        |
| 244.1278295                          | 0.792618489                                           | 0.001032143 | 0.012947193     |        |
| PPP1R35 7                            | 100435282                                             | 100436565   | - 1187          |        |
| protein_coding                       | protein phosphatase 1 regulatory subunit 35           |             |                 |        |
| [Source:HGNC Symbol;Acc:HGNC:28320]  | -                                                     | 463         | 446             | 392    |
| 269                                  | 170 301                                               | 19.10112539 | 17.80371283     |        |
| 20.54670543                          | 12.5925477                                            | 8.803301228 | 11.79089562     |        |
| ENSG00000125351                      | 1165.817491                                           | 1126.59883  | 1025.317635     |        |
| 839.1344809                          | 654.0748175                                           | 750.4959694 | 1105.911319     |        |
| 747.9017559                          | 0.564296095                                           | 0.00103276  | 0.012947193     | UPF3B  |
| X                                    | 119805311                                             | 119852998   | - 3081          |        |
| protein_coding                       | "UPF3B, regulator of nonsense mediated mRNA decay     |             |                 |        |
| [Source:HGNC Symbol;Acc:HGNC:20439]" | -                                                     | 1285        | 1273            | 882    |
| 810                                  | 573 870                                               | 20.4239676  | 19.57776658     |        |
| 17.81081257                          | 14.60849123                                           | 11.43168592 | 13.12981396     |        |
| ENSG00000157551                      | 114.3136217                                           | 106.1994184 | 105.7867401     |        |
| 234.1288798                          | 154.1013968                                           | 321.7643639 | 108.7665934     |        |
| 236.6648802                          | -1.123733908                                          | 0.001036417 | 0.012983833     | KCNJ15 |
| 21                                   | 38155549                                              | 38307357    | + 10342         |        |
| protein_coding                       | potassium voltage-gated channel subfamily J member 15 |             |                 |        |
| [Source:HGNC Symbol;Acc:HGNC:6261]   | -                                                     | 126         | 120             | 91     |
| 226                                  | 135 373                                               | 0.596615724 | 0.549797997     |        |
| 0.547449049                          | 1.214271912                                           | 0.802373534 | 1.677008703     |        |
| ENSG00000103489                      | 958.964271                                            | 838.09041   | 1372.902639     |        |
| 765.5807177                          | 555.9065203                                           | 609.023166  | 1056.65244      |        |
| 643.503468                           | 0.714287571                                           | 0.001042488 | 0.013050648     | XYLT1  |
| 16                                   | 17101769                                              | 17470881    | - 11004         |        |
| protein_coding                       | xylosyltransferase 1 [Source:HGNC                     |             |                 |        |
| Symbol;Acc:HGNC:15516]               | -                                                     | 1057 947    | 1181 739        | 487    |
| 706                                  | 4.703845938                                           | 4.077799217 | 6.677381084     |        |
| 3.731692935                          | 2.720355987                                           | 2.983219008 |                 |        |
| ENSG00000133398                      | 868.2391744                                           | 981.4596248 | 904.4185036     |        |
| 1275.277217                          | 1232.811174                                           | 1431.980815 | 918.039101      |        |
| 1313.356402                          | -0.516933285                                          | 0.001050358 | 0.013139874     | MED10  |
| 5                                    | 6371881 6378594                                       | - 1880      | protein_coding  |        |
| mediator complex subunit 10          | [Source:HGNC Symbol;Acc:HGNC:28760] -                 |             |                 |        |
| 957                                  | 1109 778                                              | 1231 1080   | 1660 24.9277323 |        |
| 27.9511794                           | 25.74711628                                           | 36.38415116 | 35.31126421     |        |
| 41.05643696                          |                                                       |             |                 |        |
| ENSG00000116521                      | 3749.668242                                           | 4671.889413 | 4190.782398     |        |
| 5132.187924                          | 5880.965899                                           | 6324.86948  | 4204.113351     |        |
| 5779.341101                          | -0.459162628                                          | 0.001052008 | 0.013151218     | SCAMP3 |
| 1                                    | 155255979                                             | 155262430   | - 2442          |        |
| protein_coding                       | secretory carrier membrane protein 3 [Source:HGNC     |             |                 |        |
| Symbol;Acc:HGNC:10565]               | -                                                     | 4133 5279   | 3605 4954       | 5152   |
| 7332                                 | 82.8797494                                            | 102.4312431 | 91.84731312     |        |
| 112.7255561                          | 129.6813596                                           | 139.6071993 |                 |        |

|                                                            |                                                |             |                |           |                |             |
|------------------------------------------------------------|------------------------------------------------|-------------|----------------|-----------|----------------|-------------|
| ENSG00000130479                                            | 1395.351986                                    |             | 1479.711896    |           | 1483.339345    |             |
| 1668.945245                                                | 2114.042866                                    |             | 2963.165121    |           | 1452.801076    |             |
| 2248.717744                                                | -0.630820022                                   |             | 0.001057564    |           | 0.013211338    | MAP1S       |
| 19                                                         | 17719242                                       |             | 17734516       |           | + 5040         |             |
| protein_coding                                             | microtubule associated protein 1S [Source:HGNC |             |                |           |                |             |
| Symbol;Acc:HGNC:15715]                                     | -                                              |             | 1538 1672      |           | 1276 1611      | 1852        |
| 3435                                                       | 14.94357414                                    |             | 15.7192629     |           | 15.75168378    |             |
| 17.76139397                                                | 22.58696121                                    |             | 31.69036367    |           |                |             |
| ENSG00000167325                                            | 4276.781054                                    |             | 3524.0507      |           | 4173.345023    |             |
| 3417.660065                                                | 2491.876661                                    |             | 1999.597307    |           | 3991.392259    |             |
| 2636.378011                                                | 0.598536497                                    |             | 0.001060032    |           | 0.013232826    | RRM1        |
| 11                                                         | 4094707                                        | 4138876     | + 4177         |           | protein_coding |             |
| ribonucleotide reductase catalytic subunit M1 [Source:HGNC |                                                |             |                |           |                |             |
| Symbol;Acc:HGNC:10451]                                     | -                                              |             | 4714 3982      |           | 3590 3299      | 2183        |
| 2318                                                       | 55.26545965                                    |             | 45.17136571    |           | 53.47327948    |             |
| 43.8863926                                                 | 32.12451803                                    |             | 25.8035806     |           |                |             |
| ENSG00000082684                                            | 0.907250966                                    |             | 0              | 2.3249833 | 9.323716454    |             |
| 44.5181813                                                 | 17.25278091                                    |             | 1.077411422    |           | 23.69822622    |             |
| -4.536002039                                               | 0.001063115                                    |             | 0.013261946    |           | SEMA5B 3       |             |
| 122909082                                                  | 123028605                                      |             | -              | 8517      | protein_coding |             |
| semaphorin 5B [Source:HGNC Symbol;Acc:HGNC:10737]          |                                                |             |                |           |                |             |
| 1                                                          | 0                                              | 2           | 9              | 39        | 20             | 0.005749658 |
| 0                                                          | 0.014609999                                    |             | 0.058717547    |           | 0.281465597    |             |
| 0.109187863                                                |                                                |             |                |           |                |             |
| ENSG00000113593                                            | 722.1717689                                    |             | 684.1012534    |           | 581.2458249    |             |
| 501.4087515                                                | 296.7878753                                    |             | 376.9732628    |           | 662.5062824    |             |
| 391.7232965                                                | 0.758119916                                    |             | 0.00106451     |           | 0.013269993    | PPWD1       |
| 5                                                          | 65563236                                       |             | 65587549       |           | + 3777         |             |
| protein_coding                                             | peptidylprolyl isomerase domain and WD repeat  |             |                |           |                |             |
| containing 1 [Source:HGNC Symbol;Acc:HGNC:28954]           |                                                |             |                |           | -              | 796         |
| 773                                                        | 500                                            | 484         | 260            | 437       | 10.32035809    |             |
| 9.69748128                                                 | 8.236256553                                    |             | 7.120498847    |           | 4.231299078    |             |
| 5.37979182                                                 |                                                |             |                |           |                |             |
| ENSG00000130176                                            | 15.42326642                                    |             | 8.849951531    |           | 16.2748831     | 0           |
| 0                                                          | 0                                              | 13.51603368 | 0              |           | 6.188376475    |             |
| 0.001065918                                                | 0.013278183                                    |             | CNN1 19        |           | 11538717       |             |
| 11550323                                                   | + 2887                                         |             | protein_coding |           | calponin 1     |             |
| [Source:HGNC Symbol;Acc:HGNC:2155]                         |                                                |             | -              |           | 17 10          | 14          |
| 0                                                          | 0                                              | 0           | 0.288357214    |           | 0.164126859    |             |
| 0.301708884                                                | 0                                              | 0           | 0              |           |                |             |
| ENSG00000171425                                            | 427.315205                                     |             | 531.882087     |           | 447.5592852    |             |
| 510.732468                                                 | 841.2794774                                    |             | 1229.26064     |           | 468.9188591    |             |
| 860.424195                                                 | -0.876260738                                   |             | 0.001071308    |           | 0.013329893    | ZNF581      |
| 19                                                         | 55635459                                       |             | 55645622       |           | + 1736         |             |
| protein_coding                                             | zinc finger protein 581 [Source:HGNC           |             |                |           |                |             |
| Symbol;Acc:HGNC:25017]                                     | zf-C2H2                                        |             | 471 601        |           | 385 493        | 737         |
| 1425                                                       | 13.28617198                                    |             | 16.40405407    |           | 13.79805448    |             |
| 15.78008151                                                | 26.09547024                                    |             | 38.16771508    |           |                |             |
| ENSG00000262943                                            | 17.23776835                                    |             | 19.46989337    |           | 15.11239145    | 0           |
| 1.141491828                                                | 0                                              |             | 17.27335106    |           | 0.380497276    |             |

|                                                |                                                       |                              |             |                       |
|------------------------------------------------|-------------------------------------------------------|------------------------------|-------------|-----------------------|
| 5.582631906                                    | 0.00107374                                            | 0.013329893                  | ALOX12P2    | 17                    |
| 6853861                                        | 6954107 +                                             | 5655                         |             |                       |
| transcribed_unprocessed_pseudogene             |                                                       | arachidonate 12-lipoxygenase |             |                       |
| pseudogene 2 [Source:HGNC Symbol;Acc:HGNC:432] | -                                                     | 19                           | 22          |                       |
| 13                                             | 0                                                     | 1                            | 0           | 0.164531734           |
|                                                | 0.143026855                                           | 0                            | 0.01086963  | 0.184338697           |
| ENSG00000164484                                | 314.8160852                                           | 377.0079352                  | 368.509853  |                       |
| 701.350671                                     | 688.3195724                                           | 431.3195226                  | 353.4446245 |                       |
| 606.9965887                                    | -0.779242303                                          | 0.001073883                  | 0.013329893 |                       |
| TMEM200A                                       | 6                                                     | 130365734                    | 130443063   | + 6137                |
| protein_coding                                 | transmembrane protein 200A [Source:HGNC               |                              |             |                       |
| Symbol;Acc:HGNC:21075]                         | -                                                     | 347                          | 426         | 317 677 603           |
| 500                                            | 2.768866616                                           | 3.2891215                    | 3.21373443  |                       |
| 6.129775783                                    | 6.039605182                                           | 3.788304668                  |             |                       |
| ENSG00000158290                                | 3795.938042                                           | 3005.44354                   | 3444.462759 |                       |
| 2894.495975                                    | 2055.826783                                           | 2041.86662                   | 3415.281447 |                       |
| 2330.729792                                    | 0.551280721                                           | 0.001074024                  | 0.013329893 | CUL4B                 |
| X                                              | 120524609                                             | 120575794                    | -           | 7031                  |
| protein_coding                                 | cullin 4B [Source:HGNC Symbol;Acc:HGNC:2555]          |                              |             | -                     |
| 4184                                           | 3396                                                  | 2963                         | 2794        | 1801 2367 29.14092019 |
|                                                | 22.88637578                                           | 26.21931856                  | 22.08113269 | 15.7450475            |
|                                                | 15.65352597                                           |                              |             |                       |
| ENSG00000196507                                | 420.0571972                                           | 557.5469465                  | 510.3338343 |                       |
| 326.3300759                                    | 312.7687609                                           | 221.6982346                  | 495.979326  |                       |
| 286.9323571                                    | 0.7913846                                             | 0.001074211                  | 0.013329893 | TCEAL3                |
| X                                              | 103607451                                             | 103629690                    | +           | 2305                  |
| protein_coding                                 | transcription elongation factor A like 3 [Source:HGNC |                              |             |                       |
| Symbol;Acc:HGNC:28247]                         | -                                                     | 463                          | 630         | 439 315 274           |
| 257                                            | 9.836458066                                           | 12.95078402                  | 11.84951124 |                       |
| 7.593669086                                    | 7.306796184                                           | 5.184336848                  |             |                       |
| ENSG00000179454                                | 489.9155216                                           | 399.1328141                  | 345.26002   |                       |
| 661.9838682                                    | 731.6962619                                           | 599.5341365                  | 411.4361186 |                       |
| 664.4047555                                    | -0.689319479                                          | 0.00107459                   | 0.013329893 | KLHL28                |
| 14                                             | 44924319                                              | 45042322                     | -           | 8076                  |
| protein_coding                                 | kelch like family member 28 [Source:HGNC              |                              |             |                       |
| Symbol;Acc:HGNC:19741]                         | -                                                     | 540                          | 451         | 297 639 641           |
| 695                                            | 3.27435779                                            | 2.646102557                  | 2.288057771 |                       |
| 4.396596315                                    | 4.878755787                                           | 4.001469514                  |             |                       |
| ENSG00000189266                                | 1904.319778                                           | 1751.405408                  | 1951.82348  |                       |
| 1416.168933                                    | 1405.17644                                            | 1133.507705                  | 1869.182889 |                       |
| 1318.28436                                     | 0.50421743                                            | 0.001076653                  | 0.013346122 | PNRC2                 |
| 1                                              | 23956839                                              | 23963462                     | +           | 2779                  |
| protein_coding                                 | proline rich nuclear receptor coactivator 2           |                              |             |                       |
| [Source:HGNC Symbol;Acc:HGNC:23158]            | -                                                     | 2099                         | 1979        | 1679                  |
| 1367                                           | 1231                                                  | 1314                         | 36.98729536 | 33.74299971           |
| 37.5897118                                     | 27.33329644                                           | 27.2280705                   | 21.98557541 |                       |
| ENSG00000133466                                | 275.8042937                                           | 251.3386235                  | 320.8476954 |                       |
| 95.30910153                                    | 36.5277385                                            | 184.6047557                  | 282.6635375 |                       |
| 105.4805319                                    | 1.415094504                                           | 0.001079791                  | 0.013375644 |                       |
| C1QTNF6 22                                     | 37180167                                              | 37199385                     | -           | 7143                  |

|                                     |                                                       |             |             |             |        |
|-------------------------------------|-------------------------------------------------------|-------------|-------------|-------------|--------|
| protein_coding                      | C1q and TNF related 6 [Source:HGNC                    |             |             |             |        |
| Symbol;Acc:HGNC:14343]              | -                                                     | 304         | 284         | 276         | 92     |
| 214                                 | 2.084114701                                           | 1.883927262 | 2.404004513 |             | 32     |
| 0.71568056                          | 0.27537004                                            | 1.393041778 |             |             |        |
| ENSG00000171763                     | 379.2309038                                           | 365.5029982 | 392.9221777 |             |        |
| 449.6103268                         | 725.9888027                                           | 757.3970818 | 379.2186932 |             |        |
| 644.3320704                         | -0.765420588                                          | 0.001085891 | 0.013435422 |             |        |
| SPATA5L1                            | 15                                                    | 45402331    | 45421419    | +           | 3406   |
| protein_coding                      | spermatogenesis associated 5 like 1                   |             |             |             |        |
| [Source:HGNC Symbol;Acc:HGNC:28762] | -                                                     | 418         | 413         |             | 338    |
| 434                                 | 636                                                   | 878         | 6.009804184 | 5.745553181 |        |
| 6.17417455                          | 7.080389177                                           | 11.47783117 | 11.98618262 |             |        |
| ENSG00000109323                     | 361.9931354                                           | 311.5182939 | 409.1970608 |             |        |
| 250.7043758                         | 176.9312334                                           | 143.1980815 | 360.90283   |             |        |
| 190.2778969                         | 0.924173907                                           | 0.001086136 | 0.013435422 |             | MANBA  |
| 4                                   | 102630770                                             | 102760994   | -           | 11743       |        |
| protein_coding                      | mannosidase beta [Source:HGNC Symbol;Acc:HGNC:6831]   |             |             |             |        |
| -                                   | 399                                                   | 352         | 352         | 242         | 155    |
| 1.66388198                          | 1.420332561                                           | 1.864963984 | 1.14511301  |             |        |
| 0.811334601                         | 0.657294571                                           |             |             |             |        |
| ENSG00000185774                     | 57.15681086                                           | 65.48964133 | 92.99933199 |             |        |
| 135.7118728                         | 231.7228411                                           | 150.0991939 | 71.88192806 |             |        |
| 172.5113026                         | -1.265980652                                          | 0.00108808  | 0.013444418 |             | KCNIP4 |
| 4                                   | 20728616                                              | 21948799    | -           | 4256        |        |
| protein_coding                      | potassium voltage-gated channel interacting protein 4 |             |             |             |        |
| [Source:HGNC Symbol;Acc:HGNC:30083] | -                                                     | 63          | 74          |             | 80     |
| 131                                 | 203                                                   | 174         | 0.724882498 | 0.823865926 |        |
| 1.169486504                         | 1.710337114                                           | 2.931850214 | 1.900984812 |             |        |
| ENSG00000081760                     | 593.3421318                                           | 646.9314569 | 584.7332999 |             |        |
| 405.0636815                         | 420.0689928                                           | 269.1433821 | 608.3356295 |             |        |
| 364.7586855                         | 0.740337432                                           | 0.001088383 | 0.013444418 |             | AACS   |
| 12                                  | 125065379                                             | 125143333   | +           | 16094       |        |
| protein_coding                      | acetoacetyl-CoA synthetase [Source:HGNC               |             |             |             |        |
| Symbol;Acc:HGNC:21298]              | -                                                     | 654         | 731         | 503         | 391    |
| 312                                 | 1.98995124                                            | 2.152186093 | 1.944512927 |             | 368    |
| 1.349972134                         | 1.405501074                                           | 0.90140843  |             |             |        |
| ENSG00000114473                     | 589.7131279                                           | 783.2207105 | 552.1835337 |             |        |
| 879.5372522                         | 1061.5874                                             | 1048.969079 | 641.7057907 |             |        |
| 996.6979105                         | -0.634184441                                          | 0.001091589 | 0.013474617 |             | IQCG   |
| 3                                   | 197889075                                             | 197960142   | -           | 7474        |        |
| protein_coding                      | IQ motif containing G [Source:HGNC                    |             |             |             |        |
| Symbol;Acc:HGNC:25251]              | -                                                     | 650         | 885         | 475         | 849    |
| 1216                                | 4.258816683                                           | 5.610694446 | 3.954097398 |             | 930    |
| 6.311994916                         | 7.648516629                                           | 7.565044718 |             |             |        |
| ENSG00000198301                     | 1553.213654                                           | 1512.456717 | 1390.340013 |             |        |
| 2028.426313                         | 2150.570604                                           | 1940.937852 | 1485.336795 |             |        |
| 2039.978256                         | -0.457147102                                          | 0.00109556  | 0.013514201 |             | SDAD1  |
| 4                                   | 75940950                                              | 75990962    | -           | 3491        |        |
| protein_coding                      | SDA1 domain containing 1 [Source:HGNC                 |             |             |             |        |
| Symbol;Acc:HGNC:25537]              | -                                                     | 1712        | 1709        | 1196        | 1958   |
|                                     |                                                       |             |             |             | 1884   |

|                                                         |                                                   |                |                 |                |
|---------------------------------------------------------|---------------------------------------------------|----------------|-----------------|----------------|
| 2250                                                    | 24.01500023                                       | 23.19629668    | 21.31513941     |                |
| 31.16555622                                             | 33.17251582                                       | 29.96840902    |                 |                |
| ENSG00000254087                                         | 434.5732127                                       | 377.0079352    | 433.6093854     |                |
| 295.251021                                              | 220.3079228                                       | 182.0168386    | 415.0635111     |                |
| 232.5252608                                             | 0.837005491                                       | 0.001097294    | 0.013526159     | LYN            |
| 8                                                       | 55879813                                          | 56014168       | + 6185          |                |
| protein_coding                                          | "LYN proto-oncogene, Src family tyrosine kinase   |                |                 |                |
| [Source:HGNC Symbol;Acc:HGNC:6735]"                     | -                                                 | 479            | 426             | 373            |
| 285                                                     | 193                                               | 211            | 3.792490425     | 3.263595578    |
| 3.752113563                                             | 2.560455308                                       | 1.918072264    | 1.586257796     |                |
| ENSG00000173267                                         | 9.979760626                                       | 9.734946684    | 20.9248497      | 0              |
| 0                                                       | 0                                                 | 13.546519      | 0               | 6.189784169    |
| 0.00110773                                              | 0.013641711                                       | SNCG 10        | 86958618        |                |
| 86963260                                                | + 1247                                            | protein_coding | synuclein gamma |                |
| [Source:HGNC Symbol;Acc:HGNC:11141]"                    | -                                                 | 11             | 11              | 18             |
| 0                                                       | 0                                                 | 0              | 0.431971322     | 0.417977277    |
| 0.898075602                                             | 0                                                 | 0              | 0               |                |
| ENSG00000105705                                         | 695.8614909                                       | 829.2404585    | 721.9073146     |                |
| 888.8609686                                             | 1334.403947                                       | 1260.315645    | 749.003088      |                |
| 1161.19352                                              | -0.632280072                                      | 0.001108968    | 0.013641711     | SUGP1          |
| 19                                                      | 19276018                                          | 19320844       | - 5356          |                |
| protein_coding                                          | SURP and G-patch domain containing 1 [Source:HGNC |                |                 |                |
| Symbol;Acc:HGNC:18643]"                                 | -                                                 | 767            | 937             | 621 858 1169   |
| 1461                                                    | 7.012671238                                       | 8.289445172    | 7.2136967       |                |
| 8.901409139                                             | 13.41594605                                       | 12.68354534    |                 |                |
| ENSG00000165525                                         | 688.6034832                                       | 466.3924457    | 574.270875      |                |
| 386.4162486                                             | 336.7400893                                       | 318.3138077    | 576.422268      |                |
| 347.1567152                                             | 0.73188946                                        | 0.001108982    | 0.013641711     | NEMF           |
| 14                                                      | 49782083                                          | 49853203       | - 9426          |                |
| protein_coding                                          | nuclear export mediator factor [Source:HGNC       |                |                 |                |
| Symbol;Acc:HGNC:10663]"                                 | -                                                 | 759            | 527             | 494 373 295    |
| 369                                                     | 3.94314751                                        | 2.649168733    | 3.260666339     |                |
| 2.198839044                                             | 1.923720357                                       | 1.820245428    |                 |                |
| ENSG00000154845                                         | 2249.075145                                       | 1862.029802    | 2333.120741     |                |
| 1532.197404                                             | 1604.93751                                        | 1463.89846     | 2148.075229     |                |
| 1533.677791                                             | 0.485947577                                       | 0.001111718    | 0.013665862     | PPP4R1         |
| 18                                                      | 9546791                                           | 9615240        | - 8131          | protein_coding |
| protein phosphatase 4 regulatory subunit 1 [Source:HGNC |                                                   |                |                 |                |
| Symbol;Acc:HGNC:9320]"                                  | -                                                 | 2479           | 2104            | 2007 1479 1406 |
| 1697                                                    | 14.93004956                                       | 12.26106558    | 15.35713698     |                |
| 10.1073256                                              | 10.62890976                                       | 9.704404697    |                 |                |
| ENSG00000160714                                         | 1889.803762                                       | 2350.547127    | 1929.736139     |                |
| 2656.223221                                             | 2889.115817                                       | 3028.725688    | 2056.695676     |                |
| 2858.021575                                             | -0.47450259                                       | 0.001114953    | 0.013696109     | UBE2Q1         |
| 1                                                       | 154548577                                         | 154559028      | - 4161          |                |
| protein_coding                                          | ubiquitin conjugating enzyme E2 Q1 [Source:HGNC   |                |                 |                |
| Symbol;Acc:HGNC:15698]"                                 | -                                                 | 2083           | 2656            | 1660 2564 2531 |
| 3511                                                    | 24.51434183                                       | 30.24522333    | 24.82088251     |                |
| 34.23988905                                             | 37.38882264                                       | 39.23413949    |                 |                |
| ENSG00000267041                                         | 241.328757                                        | 198.2389143    | 176.6987308     |                |

|                                    |                                                    |             |             |        |
|------------------------------------|----------------------------------------------------|-------------|-------------|--------|
| 415.4233665                        | 360.7114177                                        | 322.6270029 | 205.422134  |        |
| 366.253929                         | -0.832021548                                       | 0.001118089 | 0.013725101 | ZNF850 |
| 19                                 | 36714383                                           | 36772825    | - 7850      |        |
| protein_coding                     | zinc finger protein 850 [Source:HGNC               |             |             |        |
| Symbol;Acc:HGNC:27994]             | zf-C2H2                                            | 266 224     | 152 401     | 316    |
| 374                                | 1.659360178                                        | 1.352087514 | 1.20470518  |        |
| 2.83848602                         | 2.474370824                                        | 2.215302122 |             |        |
| ENSG00000152402                    | 381.0454057                                        | 306.208323  | 398.7346359 |        |
| 250.7043758                        | 179.214217                                         | 149.2365548 | 361.9961215 |        |
| 193.0517159                        | 0.907685916                                        | 0.001120542 | 0.013739263 |        |
| GUCY1A2 11                         | 106674012                                          | 107018524   | - 16361     |        |
| protein_coding                     | guanylate cyclase 1 soluble subunit alpha 2        |             |             |        |
| [Source:HGNC Symbol;Acc:HGNC:4684] |                                                    | -           | 420 346     | 343    |
| 242                                | 157 173                                            | 1.257095088 | 1.00205762  |        |
| 1.304340928                        | 0.821897321                                        | 0.589844003 | 0.491662717 |        |
| ENSG00000105372                    | 17417.40404                                        | 22613.39615 | 24179.82632 |        |
| 25129.48778                        | 32250.56862                                        | 33830.11544 | 21403.54217 |        |
| 30403.39061                        | -0.506435818                                       | 0.001120796 | 0.013739263 | RPS19  |
| 19                                 | 41859918                                           | 41872926    | + 3799      |        |
| protein_coding                     | ribosomal protein S19 [Source:HGNC                 |             |             |        |
| Symbol;Acc:HGNC:10402]             | -                                                  | 19198 25552 | 20800 24257 | 28253  |
| 39217                              | 247.4659082                                        | 318.6999872 | 340.6441131 |        |
| 354.7969177                        | 457.1330657                                        | 479.994314  |             |        |
| ENSG00000117475                    | 1082.350402                                        | 1029.249363 | 860.2438209 |        |
| 1575.708081                        | 1287.602782                                        | 1463.035821 | 990.6145288 |        |
| 1442.115561                        | -0.541193711                                       | 0.001126107 | 0.013794807 | BLZF1  |
| 1                                  | 169367970                                          | 169396540   | + 3820      |        |
| protein_coding                     | basic leucine zipper nuclear factor 1 [Source:HGNC |             |             |        |
| Symbol;Acc:HGNC:1065]              | Others                                             | 1193 1163   | 740 1521    | 1128   |
| 1696                               | 15.29346045                                        | 14.42589586 | 12.05244625 |        |
| 22.12472569                        | 18.15068822                                        | 20.64398349 |             |        |
| ENSG00000079819                    | 2108.451245                                        | 1721.315573 | 1969.260855 |        |
| 1511.478034                        | 1310.432619                                        | 1278.431065 | 1933.009224 |        |
| 1366.780573                        | 0.500103053                                        | 0.001128471 | 0.013814197 |        |
| EPB41L2 6                          | 130839347                                          | 131063322   | - 10320     |        |
| protein_coding                     | erythrocyte membrane protein band 4.1 like 2       |             |             |        |
| [Source:HGNC Symbol;Acc:HGNC:3379] |                                                    | -           | 2324 1945   | 1694   |
| 1459                               | 1148 1482                                          | 11.02770424 | 8.930306181 |        |
| 10.21269955                        | 7.855749713                                        | 6.837692262 | 6.677279024 |        |
| ENSG00000109107                    | 2297.159446                                        | 3038.188361 | 3231.726787 |        |
| 3651.788945                        | 6173.187807                                        | 3670.529138 | 2855.691531 |        |
| 4498.501963                        | -0.655528637                                       | 0.001132184 | 0.013845258 | ALDOC  |
| 17                                 | 28573115                                           | 28577264    | - 2928      |        |
| protein_coding                     | "aldolase, fructose-bisphosphate C [Source:HGNC    |             |             |        |
| Symbol;Acc:HGNC:418]"              | -                                                  | 2532 3433   | 2780 3525   | 5408   |
| 4255                               | 42.34686969                                        | 55.55577008 | 59.07184972 |        |
| 66.89599112                        | 113.5306098                                        | 67.57086992 |             |        |
| ENSG00000089234                    | 501.7097842                                        | 430.9926396 | 416.1720107 |        |
| 680.6313012                        | 686.0365887                                        | 697.8749876 | 449.6248115 |        |
| 688.1809592                        | -0.613406693                                       | 0.001132573 | 0.013845258 | BRAP   |

|                                                    |                                                       |              |             |             |                            |
|----------------------------------------------------|-------------------------------------------------------|--------------|-------------|-------------|----------------------------|
| 12                                                 | 111642146                                             | 111685986    | -           | 4686        |                            |
| protein_coding                                     | BRCA1 associated protein [Source:HGNC                 |              |             |             |                            |
| Symbol;Acc:HGNC:1099]                              | -                                                     | 553          | 487         | 358         | 657 601                    |
| 809                                                | 5.778984513                                           | 4.924397677  | 4.753216423 |             |                            |
| 7.790675744                                        | 7.88350864                                            | 8.027443462  |             |             |                            |
| ENSG00000179051                                    | 6191.080592                                           | 6843.667519  | 7470.171342 |             |                            |
| 4831.75706                                         | 4688.106938                                           | 5620.09338   | 6834.973151 |             |                            |
| 5046.65246                                         | 0.437281756                                           | 0.00113704   | 0.01389026  |             | RCC2                       |
| 1                                                  | 17406760                                              | 17439724     | -           | 4126        |                            |
| protein_coding                                     | regulator of chromosome condensation 2 [Source:HGNC   |              |             |             |                            |
| Symbol;Acc:HGNC:30297]                             | -                                                     | 6824         | 7733        | 6426        | 4664 4107                  |
| 6515                                               | 80.99132017                                           | 88.80659676  | 96.89878782 |             |                            |
| 62.81181773                                        | 61.18470063                                           | 73.42031011  |             |             |                            |
| ENSG00000144935                                    | 448.1819772                                           | 288.5084199  | 442.9093186 |             |                            |
| 168.8628647                                        | 253.4111859                                           | 209.621288   | 393.1999052 |             |                            |
| 210.6317795                                        | 0.900568861                                           | 0.001140279  | 0.013920215 |             | TRPC1                      |
| 3                                                  | 142724074                                             | 142807888    | +           | 4768        |                            |
| protein_coding                                     | transient receptor potential cation channel subfamily |              |             |             |                            |
| C member 1 [Source:HGNC                            | Symbol;Acc:HGNC:12333]                                |              |             |             | - 494 326                  |
| 381                                                | 163                                                   | 222          | 243         | 5.073636929 | 3.239722366                |
| 4.971593088                                        | 1.899605426                                           | 2.861963482  | 2.369741886 |             |                            |
| ENSG00000113594                                    | 410.9846876                                           | 320.3682454  | 383.6222445 |             |                            |
| 238.2727538                                        | 203.1855454                                           | 198.4069804  | 371.6583925 |             |                            |
| 213.2884266                                        | 0.801198913                                           | 0.001147367  | 0.013997083 |             | LIFR                       |
| 5                                                  | 38474963                                              | 38608354     | -           | 11864       |                            |
| protein_coding                                     | LIF receptor alpha [Source:HGNC                       |              |             |             | Symbol;Acc:HGNC:6597]      |
| -                                                  | 453                                                   | 362          | 330         | 230         | 178 230                    |
| 1.869802549                                        | 1.445785528                                           | 1.730571903  | 1.077230749 |             |                            |
| 0.922223585                                        | 0.901421093                                           |              |             |             |                            |
| ENSG00000233672                                    | 5.443505796                                           | 9.734946684  | 26.73730795 |             | 0                          |
| 0                                                  | 0                                                     | 13.97192014  | 0           | 6.232646757 |                            |
| 0.001154416                                        | 0.014073379                                           | RNASEH2B-AS1 | 13          | 50862172    |                            |
| 50910764                                           | -                                                     | 4642         | antisense   | RNASEH2B    |                            |
| antisense RNA 1 [Source:HGNC                       | Symbol;Acc:HGNC:39967]                                |              |             |             | - 6                        |
| 11                                                 | 23                                                    | 0            | 0           | 0           | 0.063295786                |
| 0.112282995                                        | 0.308268782                                           | 0            | 0           | 0           |                            |
| ENSG00000130309                                    | 5925.256059                                           | 6794.992786  | 7292.31012  |             |                            |
| 4677.397754                                        | 5141.279194                                           | 5111.136343  | 6670.852988 |             |                            |
| 4976.604431                                        | 0.422561564                                           | 0.001160763  | 0.014141003 |             |                            |
| COLGALT1                                           | 19                                                    | 17555594     | 17583162    | +           | 4900                       |
| protein_coding                                     | collagen beta(1-0)galactosyltransferase 1             |              |             |             |                            |
| [Source:HGNC                                       | Symbol;Acc:HGNC:26182]                                |              |             |             | - 6531 7678 6273           |
| 4515                                               | 4504                                                  | 5925         | 65.2698008  | 74.24692447 |                            |
| 79.65005025                                        | 51.20044296                                           | 56.50015796  | 56.22420105 |             |                            |
| ENSG00000125037                                    | 1525.088874                                           | 1729.280529  | 1656.550601 |             |                            |
| 2088.512486                                        | 2424.528643                                           | 2239.410962  | 1636.973335 |             |                            |
| 2250.817363                                        | -0.459320313                                          | 0.001162055  | 0.014147004 |             | EMC3                       |
| 3                                                  | 9962537                                               | 10011116     | -           | 4270        | protein_coding             |
| ER membrane protein complex subunit 3 [Source:HGNC | Symbol;Acc:HGNC:23999]                                |              |             |             | - 1681 1954 1425 2016 2124 |



|                        |                                                        |             |             |                      |             |
|------------------------|--------------------------------------------------------|-------------|-------------|----------------------|-------------|
| 2596                   | 19.27829058                                            | 21.6831875  | 20.76317842 |                      |             |
| 26.23461507            | 30.57553026                                            | 28.26882981 |             |                      |             |
| ENSG00000167685        | 565.2173518                                            | 677.0212921 | 642.8578824 |                      |             |
| 832.9186699            | 928.0328563                                            | 1091.238392 | 628.3655088 |                      |             |
| 950.7299728            | -0.598149259                                           | 0.00116543  | 0.014178325 | ZNF444               |             |
| 19                     | 56132599                                               | 56160893    | + 7239      |                      |             |
| protein_coding         | zinc finger protein 444 [Source:HGNC                   |             |             |                      |             |
| Symbol;Acc:HGNC:16052] | zf-C2H2                                                | 623         | 765         | 553                  | 804         |
| 1265                   | 4.214423293                                            | 5.007365576 | 4.752842264 | 813                  |             |
| 6.171482698            | 6.903341043                                            | 8.125366646 |             |                      |             |
| ENSG00000186106        | 282.1550504                                            | 352.2280709 | 310.3852705 |                      |             |
| 409.2075555            | 598.141718                                             | 592.6330241 | 314.9227973 |                      |             |
| 533.3274325            | -0.759937439                                           | 0.001175586 | 0.014292054 |                      |             |
| ANKRD46                | 8                                                      | 100509752   | 100559784   | -                    | 5820        |
| protein_coding         | ankyrin repeat domain 46 [Source:HGNC                  |             |             |                      |             |
| Symbol;Acc:HGNC:27229] | -                                                      | 311         | 398         | 267                  | 395         |
| 687                    | 2.616773228                                            | 3.240309755 | 2.854270463 | 524                  |             |
| 3.77125722             | 5.534210354                                            | 5.488640306 |             |                      |             |
| ENSG00000067334        | 3678.902667                                            | 3654.144987 | 2896.929192 |                      |             |
| 5297.942883            | 4351.366849                                            | 4573.712218 | 3409.992282 |                      |             |
| 4741.007317            | -0.47507849                                            | 0.001176568 | 0.014294174 |                      |             |
| DNTTIP2                | 1                                                      | 93866283    | 93879918    | -                    | 7519        |
| protein_coding         | deoxynucleotidyltransferase terminal interacting       |             |             |                      |             |
| protein                | 2 [Source:HGNC Symbol;Acc:HGNC:24013]                  |             |             |                      |             |
| 2492                   | 5114                                                   | 3812        | 5302        | 26.40945611          | 4055        |
| 20.62029147            | 37.79311444                                            | 31.16306513 | 32.78767765 | 4129                 |             |
| ENSG00000230838        | 13.60876449                                            | 6.194966072 | 20.9248497  | 0                    |             |
| 0                      | 0                                                      | 13.57619342 | 0           | 6.192897451          |             |
| 0.001177539            | 0.014296154                                            | LINC01614   | 2           | 215718043            |             |
| 215719424              | +                                                      | 648         | lincRNA     | long intergenic non- |             |
| protein_coding         | RNA 1614 [Source:HGNC Symbol;Acc:HGNC:51847]           |             |             |                      |             |
| 15                     | 7                                                      | 18          | 0           | 0                    | 1.133561107 |
| 0.511857976            | 1.728241167                                            | 0           | 0           | 0                    |             |
| ENSG00000168078        | 1208.458287                                            | 1083.234067 | 1306.640614 |                      |             |
| 558.3870188            | 303.6368263                                            | 129.3958568 | 1199.444323 |                      |             |
| 330.4732339            | 1.860309594                                            | 0.001179976 | 0.014315915 | PBK                  |             |
| 8                      | 27809620                                               | 27838095    | -           | 2165                 |             |
| protein_coding         | PDZ binding kinase [Source:HGNC Symbol;Acc:HGNC:18282] |             |             |                      |             |
| -                      | 1332                                                   | 1224        | 1124        | 539                  | 266         |
| 30.1283264             | 26.78859633                                            | 32.30094715 | 13.83384509 |                      |             |
| 7.552158501            | 3.221546293                                            |             |             |                      |             |
| ENSG00000160293        | 749.3892979                                            | 725.6960256 | 838.1564796 |                      |             |
| 570.8186407            | 503.3978962                                            | 401.1271561 | 771.080601  |                      |             |
| 491.781231             | 0.649511661                                            | 0.001183497 | 0.014348783 | VAV2                 |             |
| 9                      | 133761894                                              | 133992604   | -           | 5682                 |             |
| protein_coding         | vav guanine nucleotide exchange factor 2 [Source:HGNC  |             |             |                      |             |
| Symbol;Acc:HGNC:12658] | -                                                      | 826         | 820         | 721                  | 551         |
| 465                    | 7.118811633                                            | 6.838156939 | 7.894795446 | 441                  |             |
| 5.388432081            | 4.770728703                                            | 3.805246031 |             |                      |             |
| ENSG00000100626        | 129.7368881                                            | 113.2793796 | 120.8991316 |                      |             |

|                                      |                                                  |             |             |                      |
|--------------------------------------|--------------------------------------------------|-------------|-------------|----------------------|
| 60.0861727                           | 35.38624667                                      | 10.35166854 | 121.3051331 |                      |
| 35.27469597                          | 1.789370677                                      | 0.001191053 | 0.014430503 |                      |
| GALNT16 14                           | 69259277                                         | 69357033    | + 10802     |                      |
| protein_coding                       | polypeptide N-acetylgalactosaminyltransferase 16 |             |             |                      |
| [Source:HGNC Symbol;Acc:HGNC:23233]  | -                                                | 143         | 128         | 104                  |
| 58                                   | 31                                               | 12          | 0.648276902 | 0.561477345          |
| 0.599012676                          | 0.298356748                                      | 0.176402559 | 0.051654492 |                      |
| ENSG00000115806                      | 2105.729492                                      | 1954.069298 | 2184.32181  |                      |
| 2956.654084                          | 2561.507662                                      | 2979.555262 | 2081.373533 |                      |
| 2832.572336                          | -0.445052341                                     | 0.001194466 | 0.014456369 |                      |
| GORASP2 2                            | 170928464                                        | 170967129   | + 5340      |                      |
| protein_coding                       | golgi reassembly stacking protein 2 [Source:HGNC |             |             |                      |
| Symbol;Acc:HGNC:17500]               | -                                                | 2321        | 2208        | 1879 2854 2244       |
| 3454                                 | 21.2844566                                       | 19.59224725 | 21.89234934 |                      |
| 29.69783263                          | 25.83027059                                      | 30.07544724 |             |                      |
| ENSG00000004478                      | 2868.727554                                      | 3399.266383 | 3148.027388 |                      |
| 3512.969166                          | 4865.038172                                      | 5133.564958 | 3138.673775 |                      |
| 4503.857432                          | -0.521088091                                     | 0.001194822 | 0.014456369 | FKBP4                |
| 12                                   | 2794953                                          | 2805423     | + 5180      | protein_coding FK506 |
| binding protein 4                    | [Source:HGNC Symbol;Acc:HGNC:3720]               |             |             | - 3162               |
| 3841                                 | 2708                                             | 3391        | 4262        | 5951                 |
| 35.13508336                          | 32.52563221                                      | 36.3755923  | 50.57443572 |                      |
| 53.41844094                          |                                                  |             |             |                      |
| ENSG00000085999                      | 537.0925719                                      | 577.901835  | 542.8836005 |                      |
| 331.5099184                          | 310.4857773                                      | 395.9513218 | 552.6260024 |                      |
| 345.9823391                          | 0.67418949                                       | 0.001198139 | 0.014486586 | RAD54L               |
| 1                                    | 46247688                                         | 46278473    | + 3212      |                      |
| protein_coding                       | RAD54 like [Source:HGNC Symbol;Acc:HGNC:9826]    |             |             | -                    |
| 592                                  | 653                                              | 467         | 320         | 272                  |
| 9.633056011                          | 9.045825186                                      | 5.535877679 | 5.20523963  |                      |
| 6.644589676                          |                                                  |             |             |                      |
| ENSG00000173581                      | 584.2696221                                      | 817.7355215 | 685.8700734 |                      |
| 900.2566221                          | 1083.275745                                      | 1268.079397 | 695.9584057 |                      |
| 1083.870588                          | -0.639405711                                     | 0.001208822 | 0.014605769 |                      |
| CCDC106 19                           | 55641062                                         | 55653161    | + 2709      |                      |
| protein_coding                       | coiled-coil domain containing 106 [Source:HGNC   |             |             |                      |
| Symbol;Acc:HGNC:30181]               | -                                                | 644         | 924         | 590 869 949          |
| 1470                                 | 11.64140895                                      | 16.16178805 | 13.55032941 |                      |
| 17.82472405                          | 21.53300135                                      | 25.23128376 |             |                      |
| ENSG00000227500                      | 2343.429245                                      | 2776.229795 | 2726.042919 |                      |
| 3244.653326                          | 3641.358932                                      | 3817.177775 | 2615.233986 |                      |
| 3567.730011                          | -0.448288658                                     | 0.001215619 | 0.014677873 | SCAMP4               |
| 19                                   | 1905214                                          | 1926013     | + 6953      | protein_coding       |
| secretory carrier membrane protein 4 | [Source:HGNC                                     |             |             |                      |
| Symbol;Acc:HGNC:30385]               | -                                                | 2583        | 3137        | 2345 3132 3190       |
| 4425                                 | 18.1920173                                       | 21.37808159 | 20.98347754 |                      |
| 25.03004138                          | 28.20108476                                      | 29.59184638 |             |                      |
| ENSG00000151023                      | 25.40302705                                      | 26.54985459 | 12.78740815 |                      |
| 56.97826722                          | 49.08414861                                      | 152.687111  | 21.5800966  |                      |
| 86.24984228                          | -1.994522448                                     | 0.001226093 | 0.014794248 | ENKUR                |

|                      |                                                                                                 |             |             |             |                          |
|----------------------|-------------------------------------------------------------------------------------------------|-------------|-------------|-------------|--------------------------|
| 10                   | 24981979                                                                                        | 25062279    | -           | 4076        |                          |
| protein_coding       | "enkurin, TRPC channel interacting protein [Source:HGNC Symbol;Acc:HGNC:28388]"                 |             |             |             | 11                       |
| 55                   | 43                                                                                              | 177         | 0.33639733  | 0.348749441 |                          |
| 0.167905668          | 0.749791578                                                                                     | 0.648457683 | 2.019157094 |             |                          |
| ENSG00000134030      | 604.2291433                                                                                     | 536.3070628 | 669.5951903 |             |                          |
| 730.3577889          | 1053.596957                                                                                     | 1061.046026 | 603.3771322 |             |                          |
| 948.3335907          | -0.65330623                                                                                     | 0.001231298 | 0.014846919 |             | CTIF                     |
| 18                   | 48539046                                                                                        | 48863217    | +           | 8100        |                          |
| protein_coding       | cap binding complex dependent translation initiation factor [Source:HGNC Symbol;Acc:HGNC:23925] |             |             |             |                          |
| 576                  | 705                                                                                             | 923         | 1230        | 4.026409053 | 666 606                  |
| 4.424297387          | 4.836332395                                                                                     | 7.004288764 | 7.060754487 |             |                          |
| ENSG00000184009      | 107860.3456                                                                                     | 112744.8425 | 126486.0665 |             |                          |
| 148354.8323          | 151132.3766                                                                                     | 148605.9657 | 115697.0849 |             |                          |
| 149364.3915          | -0.368493903                                                                                    | 0.001240924 | 0.014952795 |             | ACTG1                    |
| 17                   | 81509971                                                                                        | 81523847    | -           | 2993        |                          |
| protein_coding       | actin gamma 1 [Source:HGNC Symbol;Acc:HGNC:144]                                                 |             |             |             | -                        |
| 118887               | 127396                                                                                          | 108806      | 143204      | 132399      | 172269 1945.1645         |
| 2016.858901          | 2261.793619                                                                                     | 2658.645762 | 2719.101054 |             |                          |
| 2676.279294          |                                                                                                 |             |             |             |                          |
| ENSG00000144857      | 340.2191122                                                                                     | 301.7833472 | 332.4726119 |             |                          |
| 132.6039673          | 232.8643329                                                                                     | 142.3354425 | 324.8250238 |             |                          |
| 169.2679143          | 0.943198045                                                                                     | 0.001244508 | 0.014976824 |             | BOC                      |
| 3                    | 113211003                                                                                       | 113287459   | +           | 10330       |                          |
| protein_coding       | "BOC cell adhesion associated, oncogene regulated [Source:HGNC Symbol;Acc:HGNC:17173]"          |             |             |             |                          |
| 128                  | 204                                                                                             | 165         | 1.777704737 | 1.564157561 | 375 341 286              |
| 1.722552861          | 0.688528136                                                                                     | 1.213884053 | 0.742702081 |             |                          |
| ENSG00000198176      | 5596.831209                                                                                     | 5805.568204 | 5460.22328  |             |                          |
| 4471.240024          | 4350.225357                                                                                     | 4095.810187 | 5620.874231 |             |                          |
| 4305.758523          | 0.384698314                                                                                     | 0.001244611 | 0.014976824 |             | TFDP1                    |
| 13                   | 113584721                                                                                       | 113641470   | +           | 3741        |                          |
| protein_coding       | transcription factor Dp-1 [Source:HGNC Symbol;Acc:HGNC:11749]                                   |             |             |             |                          |
| 4748                 | 80.75245708                                                                                     | 83.08881631 | 78.11594637 |             | 6169 6560 4697 4316 3811 |
| 64.10704689          | 62.61791472                                                                                     | 59.01385975 |             |             |                          |
| ENSG00000224543      | 23.58852512                                                                                     | 16.81490791 | 18.5998664  |             |                          |
| 1.035968495          | 0                                                                                               | 0.862639045 | 19.66776647 | 0.63286918  |                          |
| 4.909178359          | 0.0012486                                                                                       | 0.015009872 | SNRPGP15    |             |                          |
| 19                   | 14489388                                                                                        | 14489609    | +           | 222         |                          |
| processed_pseudogene | small nuclear ribonucleoprotein polypeptide G pseudogene 15 [Source:HGNC Symbol;Acc:HGNC:49371] |             |             |             | 26                       |
| 19                   | 16                                                                                              | 1           | 0           | 1           | 5.735206467              |
| 4.055338095          | 4.48408519                                                                                      | 0.250298974 | 0           | 0.209448881 |                          |
| ENSG00000082898      | 5789.168414                                                                                     | 4618.789704 | 5180.062792 |             |                          |
| 4366.607206          | 3395.938189                                                                                     | 3368.605472 | 5196.00697  |             |                          |
| 3710.383622          | 0.485881259                                                                                     | 0.001249055 | 0.015009872 |             | XP01                     |
| 2                    | 61477849                                                                                        | 61538626    | -           | 11708       |                          |
| protein_coding       | exportin 1 [Source:HGNC Symbol;Acc:HGNC:12825]                                                  |             |             |             | -                        |

|                                                                                                 |              |         |             |             |             |                |             |        |
|-------------------------------------------------------------------------------------------------|--------------|---------|-------------|-------------|-------------|----------------|-------------|--------|
|                                                                                                 | 6381         | 5219    | 4456        | 4215        | 2975        | 3905           | 26.68914827 |        |
|                                                                                                 | 21.12180476  |         | 23.67932482 |             | 20.00446351 |                | 15.61894216 |        |
|                                                                                                 | 15.50848387  |         |             |             |             |                |             |        |
| ENSG00000088826                                                                                 | 293.949313   |         |             | 243.3736671 |             | 446.3967936    |             |        |
| 123.2802509                                                                                     | 154.1013968  |         |             | 205.3080928 |             | 327.9065912    |             |        |
| 160.8965802                                                                                     | 1.023001841  |         |             | 0.001254253 |             | 0.015053467    |             | SMOX   |
| 20                                                                                              | 4120980      | 4187747 | +           | 2946        |             | protein_coding |             |        |
| spermine oxidase [Source:HGNC Symbol;Acc:HGNC:15862]                                            |              |         |             |             |             | -              |             | 324    |
| 275                                                                                             | 384          | 119     |             | 135         | 238         | 5.385685032    |             |        |
| 4.423096271                                                                                     | 8.109710078  |         |             | 2.244534383 |             | 2.81675054     |             |        |
| 3.756429415                                                                                     |              |         |             |             |             |                |             |        |
| ENSG00000102908                                                                                 | 1858.049978  |         |             | 1497.411799 |             | 1504.264195    |             |        |
| 2513.259569                                                                                     | 1973.639371  |         |             | 2474.911421 |             | 1619.908657    |             |        |
| 2320.603453                                                                                     | -0.518631304 |         |             | 0.001254508 |             | 0.015053467    |             | NFAT5  |
| 16                                                                                              | 69565094     |         |             | 69704666    |             | +              | 16401       |        |
| protein_coding nuclear factor of activated T cells 5 [Source:HGNC Symbol;Acc:HGNC:7774]         | RHD          |         |             | 2048        | 1692        | 1294           | 2426        | 1729   |
| 2869                                                                                            | 6.114885188  |         |             | 4.888284464 |             | 4.908748644    |             |        |
| 8.21925608                                                                                      | 6.479955521  |         |             | 8.133757829 |             |                |             |        |
| ENSG00000164125                                                                                 | 316.6305871  |         |             | 141.5992245 |             | 210.4109886    |             |        |
| 2.07193699                                                                                      | 45.65967313  |         |             | 21.56597613 |             | 222.8802668    |             |        |
| 23.09919542                                                                                     | 3.273483849  |         |             | 0.001255236 |             | 0.015053467    |             |        |
| FAM198B 4                                                                                       | 158124474    |         |             | 158173318   |             | -              | 7880        |        |
| protein_coding family with sequence similarity 198 member B [Source:HGNC Symbol;Acc:HGNC:25312] |              |         |             |             |             | -              | 349         | 160    |
| 2                                                                                               | 40           | 25      |             | 2.168841891 |             | 0.962099981    |             | 181    |
| 1.429088762                                                                                     | 0.01410314   |         |             | 0.312019067 |             | 0.14751793     |             |        |
| ENSG00000065308                                                                                 | 2953.101894  |         |             | 2798.354674 |             | 2696.980628    |             |        |
| 2421.058373                                                                                     | 1425.723293  |         |             | 1783.074907 |             | 2816.145732    |             |        |
| 1876.618858                                                                                     | 0.585484596  |         |             | 0.001262875 |             | 0.015127878    |             | TRAM2  |
| 6                                                                                               | 52497402     |         |             | 52576915    |             | -              | 6908        |        |
| protein_coding translocation associated membrane protein 2 [Source:HGNC Symbol;Acc:HGNC:16855]  |              |         |             |             |             | -              | 3255        | 3162   |
| 2337                                                                                            | 1249         | 2067    |             | 23.07423692 |             | 21.68882265    |             | 2320   |
| 20.89500612                                                                                     | 18.79829355  |         |             | 11.1136693  |             | 13.91294813    |             |        |
| ENSG00000125170                                                                                 | 124.2933823  |         |             | 153.1041615 |             | 163.9113226    |             |        |
| 319.0782964                                                                                     | 253.4111859  |         |             | 256.2037964 |             | 147.1029555    |             |        |
| 276.2310929                                                                                     | -0.910472898 |         |             | 0.001263151 |             | 0.015127878    |             | DOK4   |
| 16                                                                                              | 57471922     |         |             | 57487327    |             | -              | 4788        |        |
| protein_coding docking protein 4 [Source:HGNC Symbol;Acc:HGNC:19868]                            |              |         |             |             |             |                |             |        |
| -                                                                                               | 137          | 173     |             | 141         | 308         | 222            | 297         |        |
| 1.401183805                                                                                     | 1.71205772   |         |             | 1.832195523 |             | 3.574444995    |             |        |
| 2.850008747                                                                                     | 2.884252819  |         |             |             |             |                |             |        |
| ENSG00000158545                                                                                 | 4292.20432   |         |             | 4552.415068 |             | 4186.132431    |             |        |
| 5065.88594                                                                                      | 5985.983147  |         |             | 6697.529548 |             | 4343.58394     |             |        |
| 5916.466212                                                                                     | -0.445895314 |         |             | 0.0012729   |             | 0.015234327    |             | ZC3H18 |
| 16                                                                                              | 88570381     |         |             | 88631966    |             | +              | 8648        |        |
| protein_coding zinc finger CCH-type containing 18 [Source:HGNC Symbol;Acc:HGNC:25091]           |              |         |             |             |             |                |             |        |
| 7764                                                                                            | 26.78958282  |         |             | 4731        | 5144        | 3601           | 4890        | 5244   |
|                                                                                                 |              |         |             | 28.18458989 |             | 25.9068307     |             |        |

|                                                          |                                              |             |                      |             |   |   |
|----------------------------------------------------------|----------------------------------------------|-------------|----------------------|-------------|---|---|
| 31.41993063                                              | 37.27300111                                  | 41.74465382 |                      |             |   |   |
| ENSG00000268001                                          | 107.055614                                   | 125.6693117 | 104.6242485          |             |   |   |
| 212.3735415                                              | 207.7515127                                  | 240.6762936 | 112.4497247          |             |   |   |
| 220.2671159                                              | -0.969457675                                 | 0.001286342 | 0.01537687           | CARD8-      |   |   |
| AS1 19                                                   | 48255675                                     | 48258199    | + 1969               |             |   |   |
| antisense                                                | CARD8 antisense RNA 1 [Source:HGNC           |             |                      |             |   |   |
| Symbol;Acc:HGNC:51408]                                   | -                                            | 118 142     | 90 205               | 182         |   |   |
| 279                                                      | 2.934708532                                  | 3.417189546 | 2.843830056          |             |   |   |
| 5.785224125                                              | 5.681631098                                  | 6.588544829 |                      |             |   |   |
| ENSG00000163347                                          | 27.21752898                                  | 30.97483036 | 31.38727455          |             |   |   |
| 32.11502334                                              | 138.1205112                                  | 157.0003062 | 29.85987796          |             |   |   |
| 109.0786136                                              | -1.870772595                                 | 0.001286549 | 0.01537687           | CLDN1       |   |   |
| 3                                                        | 190305701                                    | 190322475   | - 3663               |             |   |   |
| protein_coding                                           | claudin 1 [Source:HGNC Symbol;Acc:HGNC:2032] |             |                      | -           |   |   |
| 30                                                       | 35 27                                        | 31 121      | 182                  | 0.401063389 |   |   |
| 0.45274907                                               | 0.458599622                                  | 0.470258678 | 2.030466422          |             |   |   |
| 2.310284623                                              |                                              |             |                      |             |   |   |
| ENSG00000278540                                          | 2761.67194                                   | 2369.132025 | 2462.157314          |             |   |   |
| 2021.174534                                              | 1732.784595                                  | 1025.677825 | 2530.987093          |             |   |   |
| 1593.212318                                              | 0.668483374                                  | 0.001288429 | 0.015388942          | ACACA       |   |   |
| 17                                                       | 37084988                                     | 37406818    | - 13008              |             |   |   |
| protein_coding                                           | acetyl-CoA carboxylase alpha [Source:HGNC    |             |                      |             |   |   |
| Symbol;Acc:HGNC:84]                                      | -                                            | 3044 2677   | 2118 1951            | 1518        |   |   |
| 1189                                                     | 11.45942439                                  | 9.751339652 | 10.13029924          |             |   |   |
| 8.334101489                                              | 7.173128378                                  | 4.250131276 |                      |             |   |   |
| ENSG00000207751                                          | 3.629003864                                  | 23.89486913 | 13.9498998           | 0           |   |   |
| 0                                                        | 0                                            | 13.82459093 | 0                    | 6.222537452 |   |   |
| 0.001292007                                              | 0.015421267                                  | AP000553.1  | 22                   | 21652270    |   |   |
| 21670237                                                 | +                                            | 1093        | processed_transcript | novel       |   |   |
| transcript                                               | -                                            | 4           | 27                   | 12          | 0 | 0 |
| 0.179212589                                              | 1.170496294                                  | 0.683074276 | 0                    | 0           | 0 |   |
| 0                                                        |                                              |             |                      |             |   |   |
| ENSG00000196498                                          | 5655.802522                                  | 4733.839074 | 6028.681696          |             |   |   |
| 4384.21867                                               | 3717.838884                                  | 3910.342792 | 5472.774431          |             |   |   |
| 4004.133449                                              | 0.450572916                                  | 0.001300391 | 0.01551087           | NCOR2       |   |   |
| 12                                                       | 124324415                                    | 124567589   | - 13975              |             |   |   |
| protein_coding                                           | nuclear receptor corepressor 2 [Source:HGNC  |             |                      |             |   |   |
| Symbol;Acc:HGNC:7673]                                    | MYB                                          | 6234 5349   | 5186 4232            | 3257        |   |   |
| 4533                                                     | 21.84457828                                  | 18.13623866 | 23.08806532          |             |   |   |
| 16.82696867                                              | 14.32561589                                  | 15.08220782 |                      |             |   |   |
| ENSG00000173281                                          | 513.5040467                                  | 587.6367817 | 646.3453573          |             |   |   |
| 953.0910153                                              | 760.2335576                                  | 942.8644765 | 582.4953953          |             |   |   |
| 885.3963498                                              | -0.605520345                                 | 0.001303825 | 0.015540185          |             |   |   |
| PPP1R3B 8                                                | 9136255 9151574                              | - 5776      | protein_coding       |             |   |   |
| protein phosphatase 1 regulatory subunit 3B [Source:HGNC |                                              |             |                      |             |   |   |
| Symbol;Acc:HGNC:14942]                                   | -                                            | 566 664     | 556 920              | 666         |   |   |
| 1093                                                     | 4.798637352                                  | 5.447124926 | 5.989001938          |             |   |   |
| 8.850599451                                              | 7.087521752                                  | 8.79881113  |                      |             |   |   |
| ENSG00000130772                                          | 514.4112977                                  | 592.9467526 | 563.8084502          |             |   |   |
| 716.8901985                                              | 967.9850703                                  | 866.0896015 | 557.0555002          |             |   |   |

|                                     |                                                     |             |                  |        |
|-------------------------------------|-----------------------------------------------------|-------------|------------------|--------|
| 850.3216234                         | -0.609992635                                        | 0.001304606 | 0.015540185      | MED18  |
| 1                                   | 28329002                                            | 28335967    | + 2019           |        |
| protein_coding                      | mediator complex subunit 18 [Source:HGNC            |             |                  |        |
| Symbol;Acc:HGNC:25944]              | -                                                   | 567 670     | 485 692          | 848    |
| 1004                                | 13.75230272                                         | 15.72406841 | 14.94556254      |        |
| 19.04503693                         | 25.81706651                                         | 23.12216053 |                  |        |
| ENSG00000253729                     | 14036.98695                                         | 11821.76526 | 11673.74115      |        |
| 11036.17238                         | 7311.255159                                         | 7787.905301 | 12510.83112      |        |
| 8711.777612                         | 0.522174656                                         | 0.001307392 | 0.015562894      | PRKDC  |
| 8                                   | 47773108                                            | 47960183    | - 15417          |        |
| protein_coding                      | "protein kinase, DNA-activated, catalytic subunit   |             |                  |        |
| [Source:HGNC Symbol;Acc:HGNC:9413]" | -                                                   |             | 15472 13358      | 10042  |
| 10653                               | 6405 9028                                           | 49.14453927 | 41.05518444      |        |
| 40.5253889                          | 38.39583337                                         | 25.53680863 | 27.228436        |        |
| ENSG00000152104                     | 4941.796012                                         | 4249.746725 | 5181.225284      |        |
| 4107.615082                         | 3123.121642                                         | 2753.543833 | 4790.922674      |        |
| 3328.093519                         | 0.525661501                                         | 0.001308616 | 0.015566986      | PTPN14 |
| 1                                   | 214348696                                           | 214552449   | - 18756          |        |
| protein_coding                      | "protein tyrosine phosphatase, non-receptor type 14 |             |                  |        |
| [Source:HGNC Symbol;Acc:HGNC:9647]" | -                                                   |             | 5447 4802        | 4457   |
| 3965                                | 2736 3192                                           | 14.22151405 | 12.13132876      |        |
| 14.78458902                         | 11.74667657                                         | 8.966505706 | 7.913227958      |        |
| ENSG00000125755                     | 2635.564056                                         | 2869.154286 | 2678.380761      |        |
| 3326.494837                         | 3543.190635                                         | 4654.800288 | 2727.699701      |        |
| 3841.495253                         | -0.494254481                                        | 0.001316411 | 0.015649191      | SYMPK  |
| 19                                  | 45815410                                            | 45863290    | - 10628          |        |
| protein_coding                      | sympleskin [Source:HGNC Symbol;Acc:HGNC:22935]      |             |                  | -      |
| 2905                                | 3242 2304                                           | 3211 3104   | 5396 13.38515099 |        |
| 14.45399518                         | 13.48769621                                         | 16.78807124 | 17.95219376      |        |
| 23.60757692                         |                                                     |             |                  |        |
| ENSG00000092621                     | 4812.059124                                         | 6396.744967 | 6564.590347      |        |
| 7371.95181                          | 8103.450488                                         | 9658.96939  | 5924.464812      |        |
| 8378.123896                         | -0.500160618                                        | 0.001320468 | 0.015686871      | PHGDH  |
| 1                                   | 119648411                                           | 119744226   | + 9217           |        |
| protein_coding                      | phosphoglycerate dehydrogenase [Source:HGNC         |             |                  |        |
| Symbol;Acc:HGNC:8923]               | -                                                   | 5304 7228   | 5647 7116        | 7099   |
| 11197                               | 28.18010529                                         | 37.15822817 | 38.11843369      |        |
| 42.90010899                         | 47.34290999                                         | 56.48629748 |                  |        |
| ENSG00000091409                     | 890.9204486                                         | 700.0311661 | 666.1077154      |        |
| 598.7897901                         | 218.0249392                                         | 358.8578428 | 752.35311        |        |
| 391.8908574                         | 0.940622091                                         | 0.001344297 | 0.015959241      | ITGA6  |
| 2                                   | 172427354                                           | 172506282   | + 6533           |        |
| protein_coding                      | integrin subunit alpha 6 [Source:HGNC               |             |                  |        |
| Symbol;Acc:HGNC:6142]               | -                                                   | 982 791     | 573 578          | 191    |
| 416                                 | 7.360842295                                         | 5.737071549 | 5.456935373      |        |
| 4.916173754                         | 1.797082724                                         | 2.960817852 |                  |        |
| ENSG00000233968                     | 123.3861314                                         | 101.7744426 | 118.5741483      |        |
| 62.15810969                         | 30.82027936                                         | 18.978059   | 114.5782408      |        |
| 37.31881602                         | 1.622663709                                         | 0.001359428 | 0.01612805       |        |
| AL157895.1                          | 10 19710328                                         | 19728550    | -                | 2151   |

|                                                              |                                                       |             |                      |             |             |       |
|--------------------------------------------------------------|-------------------------------------------------------|-------------|----------------------|-------------|-------------|-------|
| antisense                                                    | uncharacterized LOC101928834 [Source:NCBI             |             |                      |             |             |       |
| gene;Acc:101928834]                                          | -                                                     | 136         | 115                  | 102         | 60          | 27    |
| 22                                                           | 3.096186991                                           | 2.533283945 | 2.950302912          |             |             |       |
| 1.549968541                                                  | 0.771561794                                           | 0.475568728 |                      |             |             |       |
| ENSG00000225163                                              | 16.33051739                                           | 15.92991276 | 6.974949899          | 0           |             |       |
| 0                                                            | 0                                                     | 13.07846001 | 0                    | 6.144889216 |             |       |
| 0.001363444                                                  | 0.016164858                                           | LINC00618   | 14                   | 96931367    |             |       |
| 96945394                                                     | +                                                     | 700         | sense_overlapping    |             |             | long  |
| intergenic non-protein coding RNA 618 [Source:HGNC           |                                                       |             |                      |             |             |       |
| Symbol;Acc:HGNC:20110]                                       | -                                                     | 18          | 18                   | 6           | 0           | 0     |
| 0                                                            | 1.259224453                                           | 1.218430904 | 0.533285846          | 0           |             |       |
| 0                                                            | 0                                                     |             |                      |             |             |       |
| ENSG00000152894                                              | 3258.84547                                            | 2706.315178 | 3619.998998          |             |             |       |
| 2716.309394                                                  | 1949.668043                                           | 1732.179203 | 3195.053215          |             |             |       |
| 2132.71888                                                   | 0.583132026                                           | 0.001364511 | 0.016166665          |             |             | PTPRK |
| 6                                                            | 127968779                                             | 128520674   | -                    | 9000        |             |       |
| protein_coding                                               | "protein tyrosine phosphatase, receptor type K        |             |                      |             |             |       |
| [Source:HGNC Symbol;Acc:HGNC:9674]"                          | -                                                     |             | 3592                 | 3058        |             | 3114  |
| 2622                                                         | 1708                                                  | 2008        | 19.54440719          | 16.09983453 |             |       |
| 21.52697197                                                  | 16.18833643                                           | 11.66521418 | 10.37414269          |             |             |       |
| ENSG00000109472                                              | 578.8261163                                           | 602.6816993 | 906.7434869          |             |             |       |
| 416.459335                                                   | 473.7191087                                           | 360.5831209 | 696.0837675          |             |             |       |
| 416.9205215                                                  | 0.739151839                                           | 0.001369239 | 0.016211832          |             |             | CPE   |
| 4                                                            | 165361194                                             | 165498320   | +                    | 2958        |             |       |
| protein_coding                                               | carboxypeptidase E [Source:HGNC Symbol;Acc:HGNC:2303] |             |                      |             |             |       |
| -                                                            | 638                                                   | 681         | 780                  | 402         | 415         | 418   |
| 10.56212232                                                  | 10.9087599                                            | 16.40602162 | 7.551616506          |             |             |       |
| 8.623772424                                                  | 6.570662044                                           |             |                      |             |             |       |
| ENSG00000216636                                              | 0                                                     | 0           | 0                    | 8.287747959 | 9.131934625 |       |
| 21.56597613                                                  | 0                                                     | 12.99521957 | -6.178854799         |             |             |       |
| 0.001371162                                                  | 0.016223733                                           | RPL7P25 6   | 34616538             |             |             |       |
| 34617258                                                     | +                                                     | 721         | processed_pseudogene | ribosomal   |             |       |
| protein L7 pseudogene 25 [Source:HGNC Symbol;Acc:HGNC:36455] |                                                       |             |                      |             |             | -     |
| 0                                                            | 0                                                     | 0           | 8                    | 8           | 25          | 0     |
| 0                                                            | 0.616547819                                           | 0.682027808 | 1.612262535          |             |             |       |
| ENSG00000182179                                              | 416.4281934                                           | 370.8129692 | 344.0975284          |             |             |       |
| 273.4956827                                                  | 167.7992987                                           | 179.4289214 | 377.112897           |             |             |       |
| 206.9079676                                                  | 0.866700862                                           | 0.001372423 | 0.016227805          |             |             | UBA7  |
| 3                                                            | 49805207                                              | 49813946    | -                    | 4545        |             |       |
| protein_coding                                               | ubiquitin like modifier activating enzyme 7           |             |                      |             |             |       |
| [Source:HGNC Symbol;Acc:HGNC:12471]                          | -                                                     |             | 459                  | 419         |             | 296   |
| 264                                                          | 147                                                   | 208         | 4.945468973          | 4.368240854 |             |       |
| 4.051955528                                                  | 3.227617659                                           | 1.988066043 | 2.127945327          |             |             |       |
| ENSG00000198815                                              | 2397.864303                                           | 1887.694662 | 1893.698898          |             |             |       |
| 3042.63947                                                   | 2806.928405                                           | 2734.565774 | 2059.752621          |             |             |       |
| 2861.377883                                                  | -0.473904508                                          | 0.001387133 | 0.016390782          |             |             | FOXJ3 |
| 1                                                            | 42176539                                              | 42335877    | -                    | 6893        |             |       |
| protein_coding                                               | forkhead box J3 [Source:HGNC Symbol;Acc:HGNC:29178]   |             |                      |             |             |       |
| Fork                                                         | 2643                                                  | 2133        | 1629                 | 2937        | 2459        | 3170  |
| 18.77662653                                                  | 14.66253351                                           | 14.70346366 | 23.67596622          |             |             |       |

|                                     |                                                    |             |             |        |     |
|-------------------------------------|----------------------------------------------------|-------------|-------------|--------|-----|
| 21.9279287                          | 21.3836581                                         |             |             |        |     |
| ENSG00000104221                     | 255.8447724                                        | 288.5084199 | 318.5227121 |        |     |
| 421.6391774                         | 461.1626986                                        | 537.4241252 | 287.6253015 |        |     |
| 473.4086671                         | -0.720853013                                       | 0.001393859 | 0.016438473 | BRF2   |     |
| 8                                   | 37843268                                           | 37849904    | - 2760      |        |     |
| protein_coding                      | "BRF2, RNA polymerase III transcription initiation |             |             |        |     |
| factor subunit                      | [Source:HGNC Symbol;Acc:HGNC:17298]"               |             |             |        | 282 |
| 326                                 | 274 407                                            | 404 623     | 5.003440157 |        |     |
| 5.596737769                         | 6.176583648                                        | 8.194026625 | 8.997454171 |        |     |
| 10.49566554                         |                                                    |             |             |        |     |
| ENSG00000171490                     | 4947.239517                                        | 5160.406738 | 5023.126419 |        |     |
| 6138.113332                         | 6885.478708                                        | 6669.062459 | 5043.590892 |        |     |
| 6564.218166                         | -0.380140413                                       | 0.001394267 | 0.016438473 | RSL1D1 |     |
| 16                                  | 11833850                                           | 11851585    | - 6167      |        |     |
| protein_coding                      | ribosomal L1 domain containing 1 [Source:HGNC      |             |             |        |     |
| Symbol;Acc:HGNC:24534]              | -                                                  | 5453 5831   | 4321 5925   | 6032   |     |
| 7731                                | 43.30023295                                        | 44.80180731 | 43.59304085 |        |     |
| 53.38588541                         | 60.12218348                                        | 58.28982386 |             |        |     |
| ENSG00000087510                     | 93.4468495                                         | 66.37463648 | 79.04943219 |        |     |
| 17.61146441                         | 28.5372957                                         | 27.60444945 | 79.62363939 |        |     |
| 24.58440319                         | 1.694912078                                        | 0.001394598 | 0.016438473 | TFAP2C |     |
| 20                                  | 56629302                                           | 56639283    | + 3005      |        |     |
| protein_coding                      | transcription factor AP-2 gamma [Source:HGNC       |             |             |        |     |
| Symbol;Acc:HGNC:11744]              | AP-2                                               | 103 75      | 68 17       | 25     |     |
| 32                                  | 1.678500334                                        | 1.182614577 | 1.407898295 |        |     |
| 0.314352189                         | 0.511379003                                        | 0.4951497   |             |        |     |
| ENSG00000112977                     | 3193.5234                                          | 3119.607915 | 3915.271877 |        |     |
| 2835.445771                         | 2244.172934                                        | 2093.624963 | 3409.467731 |        |     |
| 2391.081223                         | 0.51174345                                         | 0.001394887 | 0.016438473 | DAP    |     |
| 5                                   | 10679230                                           | 10761272    | - 3361      |        |     |
| protein_coding                      | death associated protein [Source:HGNC              |             |             |        |     |
| Symbol;Acc:HGNC:2672]               | -                                                  | 3520 3525   | 3368 2737   | 1966   |     |
| 2427                                | 51.28647314                                        | 49.6954983  | 62.34626153 |        |     |
| 45.24997344                         | 35.95525401                                        | 33.57625712 |             |        |     |
| ENSG00000167283                     | 599.6928885                                        | 774.370759  | 859.0813293 |        |     |
| 508.660531                          | 481.7095515                                        | 427.0063274 | 744.3816589 |        |     |
| 472.4588033                         | 0.655652364                                        | 0.001395971 | 0.016440306 | ATP5MG |     |
| 11                                  | 118401154                                          | 118431496   | + 3382      |        |     |
| protein_coding                      | ATP synthase membrane subunit g [Source:HGNC       |             |             |        |     |
| Symbol;Acc:HGNC:14247]              | -                                                  | 661 875     | 739 491     | 422    |     |
| 495                                 | 9.570982888                                        | 12.25916501 | 13.5949521  |        |     |
| 8.06714629                          | 7.669838298                                        | 6.805540358 |             |        |     |
| ENSG00000040531                     | 548.8868344                                        | 774.370759  | 544.0460921 |        |     |
| 1075.335298                         | 945.1552337                                        | 881.6171043 | 622.4345618 |        |     |
| 967.3692119                         | -0.634909639                                       | 0.001404721 | 0.016532346 | CTNS   |     |
| 17                                  | 3636468 3661542                                    | + 3398      |             |        |     |
| protein_coding                      | "cystinosin, lysosomal cystine transporter         |             |             |        |     |
| [Source:HGNC Symbol;Acc:HGNC:2518]" | -                                                  |             | 605 875     | 468    |     |
| 1038                                | 828 1022                                           | 8.718879664 | 12.20144086 |        |     |
| 8.568983866                         | 16.97407132                                        | 14.97801711 | 13.98487341 |        |     |



|                                                          |                                                  |             |                 |                |
|----------------------------------------------------------|--------------------------------------------------|-------------|-----------------|----------------|
| ENSG00000141644                                          | 1700.18831                                       | 1793.00018  | 1618.188377     |                |
| 2227.332264                                              | 2390.283888                                      | 2273.053884 | 1703.792289     |                |
| 2296.890012                                              | -0.430536146                                     | 0.00140824  | 0.01656274      | MBD1           |
| 18                                                       | 50266882                                         | 50281774    | - 6734          |                |
| protein_coding                                           | methyl-CpG binding domain protein 1 [Source:HGNC |             |                 |                |
| Symbol;Acc:HGNC:6916]                                    | MBD                                              | 1874        | 2026            | 1392 2150 2094 |
| 2635                                                     | 13.62778138                                      | 14.2558386  | 12.86094763     |                |
| 17.74097123                                              | 19.11397112                                      | 18.19443298 |                 |                |
| ENSG00000100934                                          | 1976.899855                                      | 1655.825931 | 2393.570307     |                |
| 1484.542853                                              | 1441.704179                                      | 884.2050214 | 2008.765364     |                |
| 1270.150685                                              | 0.661715038                                      | 0.001420362 | 0.01669421      | SEC23A         |
| 14                                                       | 39031919                                         | 39109646    | - 8945          |                |
| protein_coding                                           | "Sec23 homolog A, coat complex II component      |             |                 |                |
| [Source:HGNC Symbol;Acc:HGNC:10701]"                     | -                                                | 2179        | 1871            | 2059           |
| 1433                                                     | 1263 1025                                        | 11.92904203 | 9.911054937     |                |
| 14.32131339                                              | 8.901801159                                      | 8.679013539 | 5.328126639     |                |
| ENSG00000167767                                          | 858.2594138                                      | 813.3105457 | 816.0691382     |                |
| 664.0558052                                              | 485.134027                                       | 435.6327179 | 829.2130326     |                |
| 528.2741834                                              | 0.651188426                                      | 0.001422244 | 0.016705224     | KRT80          |
| 12                                                       | 52168996                                         | 52192000    | - 4350          |                |
| protein_coding                                           | keratin 80 [Source:HGNC Symbol;Acc:HGNC:27056] - |             |                 |                |
| 946                                                      | 919 702                                          | 641 425     | 505 10.64953298 |                |
| 10.01042913                                              | 10.04048523                                      | 8.188056226 | 6.005470435     |                |
| 5.39800322                                               |                                                  |             |                 |                |
| ENSG00000225648                                          | 508.0605409                                      | 506.2172276 | 606.8206412     |                |
| 311.826517                                               | 218.0249392                                      | 397.6765999 | 540.3661366     |                |
| 309.1760187                                              | 0.80215385                                       | 0.001429214 | 0.016775959     | SBDSP1         |
| 7                                                        | 72829425                                         | 72836701    | + 1239          |                |
| transcribed_unprocessed_pseudogene                       | "SBDS, ribosome maturation                       |             |                 |                |
| factor pseudogene 1 [Source:HGNC Symbol;Acc:HGNC:21646]" | -                                                |             |                 |                |
| 560                                                      | 572 522                                          | 301 191     | 461 22.13326094 |                |
| 21.87515622                                              | 26.21235513                                      | 13.49917517 | 9.475658949     |                |
| 17.30057897                                              |                                                  |             |                 |                |
| ENSG00000137876                                          | 2695.44262                                       | 3169.167643 | 3514.212258     |                |
| 4012.305981                                              | 4382.187128                                      | 4398.596492 | 3126.274174     |                |
| 4264.3632                                                | -0.448243473                                     | 0.001433481 | 0.016803475     |                |
| RSL24D1 15                                               | 55180806                                         | 55197067    | - 3009          |                |
| protein_coding                                           | ribosomal L24 domain containing 1 [Source:HGNC   |             |                 |                |
| Symbol;Acc:HGNC:18479]                                   | -                                                | 2971 3581   | 3023 3873       | 3839           |
| 5099                                                     | 48.35141048                                      | 56.39084132 | 62.50615809     |                |
| 71.52162165                                              | 78.4229698                                       | 78.79412595 |                 |                |
| ENSG00000136718                                          | 1800.893167                                      | 2124.873363 | 1859.98664      |                |
| 2173.461902                                              | 2818.343324                                      | 3711.935812 | 1928.58439      |                |
| 2901.247013                                              | -0.589364432                                     | 0.001433725 | 0.016803475     | IMP4           |
| 2                                                        | 130342225                                        | 130347810   | + 3861          |                |
| protein_coding                                           | "IMP4, U3 small nucleolar ribonucleoprotein      |             |                 |                |
| [Source:HGNC Symbol;Acc:HGNC:30856]"                     | -                                                | 1985        | 2401            | 1600           |
| 2098                                                     | 2469 4303                                        | 25.17615438 | 29.46583817     |                |
| 25.78261881                                              | 30.19379665                                      | 39.30688684 | 51.82061497     |                |
| ENSG00000103245                                          | 525.2983093                                      | 718.6160643 | 652.1578156     |                |

|                                                                    |                      |                  |                       |             |
|--------------------------------------------------------------------|----------------------|------------------|-----------------------|-------------|
| 792.5158986                                                        | 1085.558729          | 1073.985611      | 632.0240631           |             |
| 984.0200795                                                        | -0.638925533         | 0.001434408      | 0.016803475           | CIA03       |
| 16                                                                 | 729753 741329        | - 8101           | protein_coding        |             |
| cytosolic iron-sulfur assembly component 3 [Source:HGNC            |                      |                  |                       |             |
| Symbol;Acc:HGNC:14179]                                             | -                    | 579 812          | 561 765               | 951         |
| 1245                                                               | 3.5000046            | 4.749455664      | 4.30854939            |             |
| 5.247287339                                                        | 7.215879048          | 7.145979029      |                       |             |
| ENSG00000153179                                                    | 534.370819           | 489.4023197      | 482.4340347           |             |
| 382.2723746                                                        | 267.1090878          | 213.9344832      | 502.0690578           |             |
| 287.7719819                                                        | 0.804497412          | 0.001442746      | 0.016889959           | RASSF3      |
| 12                                                                 | 64507001             | 64697567         | + 4226                |             |
| protein_coding Ras association domain family member 3 [Source:HGNC |                      |                  |                       |             |
| Symbol;Acc:HGNC:14271]                                             | -                    | 589 553          | 415 369               | 234         |
| 248                                                                | 6.825185911          | 6.200433862      | 6.109778285           |             |
| 4.851867331                                                        | 3.40356246           | 2.728683761      |                       |             |
| ENSG00000167840                                                    | 309.3725794          | 288.5084199      | 261.5606212           |             |
| 447.5383898                                                        | 519.3787818          | 432.1821617      | 286.4805402           |             |
| 466.3664444                                                        | -0.701241636         | 0.001453477      | 0.017003458           | ZNF232      |
| 17                                                                 | 5105541 5123116      | - 2794           | protein_coding zinc   |             |
| finger protein 232 [Source:HGNC Symbol;Acc:HGNC:13026] zf-C2H2 341 |                      |                  |                       |             |
| 326                                                                | 225 432              | 455 501          | 5.976633995           |             |
| 5.52863144                                                         | 5.010291142          | 8.591507799      | 10.0099603            |             |
| 8.337624696                                                        |                      |                  |                       |             |
| ENSG00000250657                                                    | 55.34230892          | 68.14462679      | 17.43737475           |             |
| 118.1004084                                                        | 136.9790194          | 161.3135015      | 46.97477015           |             |
| 138.7976431                                                        | -1.554060282         | 0.001454363      | 0.017003458           |             |
| AC097451.1                                                         | 4 43340875           | 43345600         | + 681                 |             |
|                                                                    | processed_transcript | novel transcript | -                     | 61          |
| 77                                                                 | 15 114               | 120 187          | 4.386432055           |             |
| 5.35759714                                                         | 1.370411498          | 9.301859664      | 10.83132268           |             |
| 12.76807758                                                        |                      |                  |                       |             |
| ENSG00000088836                                                    | 8.165258694          | 4.424975766      | 11.6249165            |             |
| 31.07905485                                                        | 46.80116496          | 53.48362081      | 8.071716986           |             |
| 43.78794687                                                        | -2.455654818         | 0.001455707      | 0.017003984           |             |
| SLC4A11 20                                                         | 3227417 3239559      | - 4346           | protein_coding solute |             |
| carrier family 4 member 11 [Source:HGNC Symbol;Acc:HGNC:16438] -   |                      |                  |                       |             |
| 9                                                                  | 5 10                 | 30 41            | 62 0.101410161        |             |
|                                                                    | 0.054513833          | 0.143158495      | 0.383569067           | 0.579884493 |
|                                                                    | 0.663335111          |                  |                       |             |
| ENSG00000130717                                                    | 1014.30658           | 1157.57366       | 1052.054943           |             |
| 1352.974854                                                        | 1521.608607          | 1711.475866      | 1074.645061           |             |
| 1528.686442                                                        | -0.508628288         | 0.001456331      | 0.017003984           | UCK1        |
| 9                                                                  | 131523801            | 131531268        | - 2688                |             |
| protein_coding uridine-cytidine kinase 1 [Source:HGNC              |                      |                  |                       |             |
| Symbol;Acc:HGNC:14859]                                             | -                    | 1118 1308        | 905 1306              | 1333        |
| 1984                                                               | 20.36766404          | 23.0571126       | 20.94720879           |             |
| 26.99764959                                                        | 30.48233595          | 34.31969515      |                       |             |
| ENSG00000154122                                                    | 2540.302705          | 2293.022442      | 3487.47495            |             |
| 2045.001809                                                        | 1873.18809           | 1780.486989      | 2773.600032           |             |
| 1899.558963                                                        | 0.545636115          | 0.001457344      | 0.017004586           | ANKH        |

|                                     |                                                   |             |                                                |             |             |
|-------------------------------------|---------------------------------------------------|-------------|------------------------------------------------|-------------|-------------|
| 5                                   | 14704800                                          | 14871785    | -                                              | 12702       |             |
| protein_coding                      | ANKH inorganic pyrophosphate transport regulator  |             |                                                |             |             |
| [Source:HGNC Symbol;Acc:HGNC:15492] | -                                                 | 2800        | 2591                                           | 3000        |             |
| 1974                                | 1641                                              | 2064        | 10.79480015                                    | 9.665442586 |             |
| 14.69453992                         | 8.635491948                                       | 7.941157924 | 7.55559382                                     |             |             |
| ENSG00000119801                     | 524.3910583                                       | 448.6925426 | 661.4577488                                    |             |             |
| 850.5301343                         | 877.8072159                                       | 797.0784778 | 544.8471166                                    |             |             |
| 841.805276                          | -0.629162049                                      | 0.001462707 | 0.017055913                                    |             | YPEL5       |
| 2                                   | 30146941                                          | 30160533    | +                                              | 3421        |             |
| protein_coding                      | yippee like 5 [Source:HGNC Symbol;Acc:HGNC:18329] |             |                                                |             |             |
| -                                   | 578                                               | 507         | 569                                            | 821         | 769         |
| 8.273770074                         | 7.022331481                                       | 10.34822919 | 13.33527962                                    |             |             |
| 13.81721851                         | 12.55885121                                       |             |                                                |             |             |
| ENSG00000090013                     | 897.2712054                                       | 1273.508025 | 1200.853874                                    |             |             |
| 1675.161056                         | 1562.702313                                       | 1668.343914 | 1123.877702                                    |             |             |
| 1635.402428                         | -0.541570366                                      | 0.001464892 | 0.017060032                                    |             | BLVRB       |
| 19                                  | 40447765                                          | 40465840    | -                                              | 1689        |             |
| protein_coding                      | biliverdin reductase B [Source:HGNC               |             |                                                |             |             |
| Symbol;Acc:HGNC:1063]               | -                                                 | 989         | 1439                                           | 1033        | 1617        |
| 1934                                | 28.67446512                                       | 40.36989178 | 38.05200267                                    |             | 1369        |
| 53.19764586                         | 49.82200016                                       | 53.24242629 |                                                |             |             |
| ENSG00000262001                     | 93.4468495                                        | 64.60464618 | 89.51185704                                    |             |             |
| 294.2150526                         | 130.1300684                                       | 163.9014186 | 82.52111757                                    |             |             |
| 196.0821799                         | -1.250113178                                      | 0.001466206 | 0.017060032                                    |             |             |
| DLGAP1-AS2                          | 18                                                | 3603000     | 3608336                                        | +           | 3171        |
| DLGAP1 antisense RNA 2              | [Source:HGNC Symbol;Acc:HGNC:28146]               |             |                                                |             |             |
| -                                   | 103                                               | 73          | 77                                             | 284         | 114         |
| 1.59063182                          | 1.090819917                                       | 1.510780358 | 4.976616117                                    | 190         |             |
| 2.209815266                         | 2.786046605                                       |             |                                                |             |             |
| ENSG00000225285                     | 12.70151352                                       | 15.0449176  | 10.46242485                                    |             | 0           |
| 0                                   | 0                                                 | 12.73628533 | 0                                              | 6.10506556  |             |
| 0.001466319                         | 0.017060032                                       | LINC01770   | 1                                              | 1430539     |             |
| 1434573                             | -                                                 | 851         | lincRNA long intergenic non-protein coding RNA |             |             |
| 1770                                | [Source:HGNC Symbol;Acc:HGNC:52560]               |             |                                                |             |             |
| 9                                   | 0                                                 | 0           | 0                                              | 0.805614286 | 0.946554887 |
| 0.657990762                         | 0                                                 | 0           | 0                                              |             |             |
| ENSG00000180370                     | 4123.45564                                        | 3961.238305 | 4103.595524                                    |             |             |
| 5474.057527                         | 5423.227676                                       | 4984.328404 | 4062.763157                                    |             |             |
| 5293.871202                         | -0.381785689                                      | 0.001466918 | 0.017060032                                    |             | PAK2        |
| 3                                   | 196739857                                         | 196832647   | +                                              | 6270        |             |
| protein_coding                      | p21 (RAC1) activated kinase 2 [Source:HGNC        |             |                                                |             |             |
| Symbol;Acc:HGNC:8591]               | -                                                 | 4545        | 4476                                           | 3530        | 5284        |
| 5778                                | 35.49727624                                       | 33.82587019 | 35.02789274                                    |             | 4751        |
| 46.82818353                         | 46.57628545                                       | 42.84903196 |                                                |             |             |
| ENSG00000005102                     | 1.814501932                                       | 19.46989337 | 20.9248497                                     |             | 0           |
| 0                                   | 0                                                 | 14.06974833 | 0                                              | 6.245438762 |             |
| 0.001473478                         | 0.017125067                                       | MEOX1       | 17                                             | 43640388    |             |
| 43661954                            | -                                                 | 2707        | protein_coding mesenchyme homeobox 1           |             |             |
| [Source:HGNC Symbol;Acc:HGNC:7013]  |                                                   | Homeobox    | 2                                              | 22          |             |
| 18                                  | 0                                                 | 0           | 0                                              | 0.036180155 | 0.385088781 |

|                                 |                                                        |   |             |   |                |        |
|---------------------------------|--------------------------------------------------------|---|-------------|---|----------------|--------|
|                                 | 0.413705311                                            | 0 | 0           | 0 |                |        |
| ENSG00000174444                 | 32366.17821                                            |   | 30497.81797 |   | 36625.46192    |        |
| 42025.09796                     | 44207.69552                                            |   | 42854.18249 |   | 33163.1527     |        |
| 43028.99199                     | -0.375764933                                           |   | 0.001474891 |   | 0.017130232    | RPL4   |
| 15                              | 66498015                                               |   | 66524532    |   | - 5637         |        |
| protein_coding                  | ribosomal protein L4 [Source:HGNC                      |   |             |   |                |        |
| Symbol;Acc:HGNC:10353]          | -                                                      |   | 35675 34461 |   | 31506 40566    | 38728  |
| 49678                           | 309.9164513                                            |   | 289.6718425 |   | 347.7379427    |        |
| 399.8767881                     | 422.3032221                                            |   | 409.7765356 |   |                |        |
| ENSG00000135842                 | 1482.448078                                            |   | 1535.466591 |   | 1364.765197    |        |
| 2139.274942                     | 1942.819092                                            |   | 1911.608124 |   | 1460.893289    |        |
| 1997.900719                     | -0.451154543                                           |   | 0.001479739 |   | 0.017170069    |        |
| FAM129A 1                       | 184790724                                              |   | 184974550   |   | - 8372         |        |
| protein_coding                  | family with sequence similarity 129 member A           |   |             |   |                |        |
| [Source:HGNC                    | Symbol;Acc:HGNC:16784]                                 | - |             |   | 1634 1735      | 1174   |
| 2065                            | 1702 2216                                              |   | 9.557658658 |   | 9.81966564     |        |
| 8.724603998                     | 13.70575234                                            |   | 12.4961922  |   | 12.30754846    |        |
| ENSG00000167671                 | 2330.727732                                            |   | 2716.050125 |   | 3010.853373    |        |
| 3118.26517                      | 4133.34191                                             |   | 4208.815902 |   | 2685.877077    |        |
| 3820.140994                     | -0.508590456                                           |   | 0.001480262 |   | 0.017170069    | UBXN6  |
| 19                              | 4444999 4457822                                        | - | 5275        |   | protein_coding | UBX    |
| domain protein 6                | [Source:HGNC                                           |   |             |   | -              | 2569   |
| Symbol;Acc:HGNC:14928]          |                                                        |   |             |   |                |        |
| 3069                            | 2590 3010                                              |   | 3621 4879   |   | 23.84900825    |        |
| 27.56772103                     | 30.548096                                              |   | 31.70706736 |   | 42.19426451    |        |
| 43.00702212                     |                                                        |   |             |   |                |        |
| ENSG00000126351                 | 635.9829272                                            |   | 493.8272954 |   | 831.1815297    |        |
| 313.898454                      | 458.8797149                                            |   | 374.3853456 |   | 653.6639174    |        |
| 382.3878382                     | 0.772923309                                            |   | 0.001496765 |   | 0.017340536    | THRA   |
| 17                              | 40058290                                               |   | 40093867    |   | + 6959         |        |
| protein_coding                  | thyroid hormone receptor alpha [Source:HGNC            |   |             |   |                |        |
| Symbol;Acc:HGNC:11796]          | THR-like                                               |   | 701 558     |   | 715 303        |        |
| 402                             | 434 4.932872212                                        |   | 3.79938937  |   | 6.392431044    |        |
| 2.419400888                     | 3.550802989                                            |   | 2.899839165 |   |                |        |
| ENSG00000241945                 | 12.70151352                                            |   | 20.35488852 |   | 211.5734803    |        |
| 15.53952742                     | 11.41491828                                            |   | 8.626390453 |   | 81.54329411    |        |
| 11.86027872                     | 2.779619223                                            |   | 0.001496919 |   | 0.017340536    | PWP2   |
| 21                              | 44107290                                               |   | 44131181    |   | + 6922         |        |
| protein_coding                  | "PWP2, small subunit processome component [Source:HGNC |   |             |   |                |        |
| Symbol;Acc:HGNC:9711]"          | -                                                      |   | 14 23       |   | 182 15 10      |        |
| 10                              | 0.099043305                                            |   | 0.157442755 |   | 1.635861908    |        |
| 0.120412537                     | 0.088800572                                            |   | 0.067173724 |   |                |        |
| ENSG00000132254                 | 1472.468318                                            |   | 1773.530287 |   | 1451.952071    |        |
| 1629.578442                     | 2794.371995                                            |   | 2913.994695 |   | 1565.983558    |        |
| 2445.981711                     | -0.6432439                                             |   | 0.001499601 |   | 0.017351734    | ARFIP2 |
| 11                              | 6474683 6481479                                        | - | 5312        |   | protein_coding | ADP    |
| ribosylation factor interacting | protein 2 [Source:HGNC                                 |   |             |   |                |        |
| Symbol;Acc:HGNC:17160]          | -                                                      |   | 1623 2004   |   | 1249 1573      | 2448   |
| 3378                            | 14.96198231                                            |   | 17.87582489 |   | 14.62888476    |        |
| 16.4544246                      | 28.32700814                                            |   | 29.56872492 |   |                |        |
| ENSG0000028310                  | 1206.643785                                            |   | 1238.993214 |   | 1135.754342    |        |

|                                                                                         |               |             |                |             |
|-----------------------------------------------------------------------------------------|---------------|-------------|----------------|-------------|
| 1361.262602                                                                             | 1977.063846   | 1912.470763 | 1193.797114    |             |
| 1750.265737                                                                             | -0.551805161  | 0.001499847 | 0.017351734    | BRD9        |
| 5                                                                                       | 850291 892824 | - 9572      | protein_coding |             |
| bromodomain containing 9 [Source:HGNC Symbol;Acc:HGNC:25818]                            |               |             |                | -           |
| 1330                                                                                    | 1400 977      | 1314 1732   | 2217           | 6.804208836 |
| 6.930296038                                                                             | 6.350365474   | 7.627895223 |                | 11.12224757 |
| 10.76946233                                                                             |               |             |                |             |
| ENSG00000154065                                                                         | 146.0674055   | 123.8993214 | 77.88694054    |             |
| 223.7691949                                                                             | 262.5431205   | 228.599347  | 115.9512225    |             |
| 238.3038875                                                                             | -1.034375241  | 0.00151025  | 0.017460662    |             |
| ANKRD29 18                                                                              | 23598926      | 23662885    | - 6391         |             |
| protein_coding ankyrin repeat domain 29 [Source:HGNC Symbol;Acc:HGNC:27110]             | -             | 161 140     | 67 216         | 230         |
| 265                                                                                     | 1.233632329   | 1.037972049 | 0.652248114    |             |
| 1.878006008                                                                             | 2.212108266   | 1.928004639 |                |             |
| ENSG00000027847                                                                         | 399.190425    | 484.0923488 | 476.6215765    |             |
| 697.2067971                                                                             | 690.602556    | 672.8584553 | 453.3014501    |             |
| 686.8892695                                                                             | -0.599959231  | 0.001524692 | 0.01761612     |             |
| B4GALT7 5                                                                               | 177600100     | 177610347   | + 4927         |             |
| protein_coding "beta-1,4-galactosyltransferase 7 [Source:HGNC Symbol;Acc:HGNC:930]"     | -             | 440 547     | 410 673        | 605         |
| 780                                                                                     | 4.373194546   | 5.260550631 | 5.177357342    |             |
| 7.590048405                                                                             | 7.547796329   | 7.361105778 |                |             |
| ENSG00000168906                                                                         | 4714.98327    | 5112.617    | 4160.557615    |             |
| 5542.431448                                                                             | 6256.51671    | 7712.855704 | 4662.719295    |             |
| 6503.934621                                                                             | -0.480119401  | 0.0015303   | 0.017665481    | MAT2A       |
| 2                                                                                       | 85539165      | 85545280    | + 4487         |             |
| protein_coding methionine adenosyltransferase 2A [Source:HGNC Symbol;Acc:HGNC:6904]     | -             | 5197 5777   | 3579 5350      | 5481        |
| 8941                                                                                    | 56.71857758   | 61.00602647 | 49.62636615    |             |
| 66.25364192                                                                             | 75.08463825   | 92.65333231 |                |             |
| ENSG00000101974                                                                         | 1975.992604   | 1254.923127 | 1578.663661    |             |
| 1223.478792                                                                             | 1006.795792   | 905.7709975 | 1603.193131    |             |
| 1045.348527                                                                             | 0.617277291   | 0.001531859 | 0.017665481    | ATP11C      |
| X                                                                                       | 139726346     | 139945276   | - 7407         |             |
| protein_coding ATPase phospholipid transporting 11C [Source:HGNC Symbol;Acc:HGNC:13554] | -             | 2178 1418   | 1358 1181      | 882         |
| 1050                                                                                    | 14.39939397   | 9.071107778 | 11.40681169    |             |
| 8.859711836                                                                             | 7.319368298   | 6.591404627 |                |             |
| ENSG00000210077                                                                         | 160.583421    | 123.8993214 | 119.7366399    |             |
| 189.5822346                                                                             | 229.4398575   | 472.7261968 | 134.7397941    |             |
| 297.2494296                                                                             | -1.14274386   | 0.00153196  | 0.017665481    | MT-TV       |
| MT                                                                                      | 1602 1670     | + 69        | Mt_tRNA        |             |
| mitochondrially encoded tRNA valine [Source:HGNC Symbol;Acc:HGNC:7500]                  | -             | 177 140     | 103 183        | 201         |
| 548                                                                                     | 125.6182848   | 96.14028069 | 92.87417749    |             |
| 147.3716828                                                                             | 179.0582464   | 369.285696  |                |             |
| ENSG00000135956                                                                         | 1979.621608   | 2419.576749 | 2039.010354    |             |
| 2634.467883                                                                             | 3050.066165   | 3224.544751 | 2146.06957     |             |
| 2969.692933                                                                             | -0.468521325  | 0.001534893 | 0.017687764    |             |

|                         |              |                                                       |                |                         |             |             |
|-------------------------|--------------|-------------------------------------------------------|----------------|-------------------------|-------------|-------------|
| TMEM127                 | 2            | 96248516                                              | 96265994       | -                       | 6367        |             |
| protein_coding          |              | transmembrane protein 127                             | [Source:HGNC   |                         |             |             |
| Symbol;Acc:HGNC:26038]  | -            | 2182                                                  | 2734           | 1754                    | 2543        | 2672        |
|                         | 3738         | 16.78218792                                           | 20.3465182     | 17.13963566             |             |             |
| 22.19338535             |              | 25.7957978                                            | 27.29829139    |                         |             |             |
| ENSG00000133424         |              | 9.07250966                                            | 10.61994184    | 18.5998664              |             | 0           |
|                         | 0            | 0                                                     | 12.76410597    | 0                       | 6.104470912 |             |
| 0.001537975             |              | 0.017711741                                           | LARGE1         | 22                      | 33162226    |             |
| 33922841                | -            | 10687                                                 | protein_coding | LARGE xylosyl- and      |             |             |
| glucuronyltransferase 1 | [Source:HGNC | Symbol;Acc:HGNC:6511]                                 | -              |                         |             |             |
|                         | 10           | 12                                                    | 16             | 0                       | 0           | 0.045821877 |
|                         | 0.05320493   | 0.093147461                                           | 0              | 0                       | 0           |             |
| ENSG00000103194         |              | 3249.77296                                            | 3148.812755    | 3359.600868             |             |             |
| 3746.062078             |              | 4768.011366                                           | 4737.613637    | 3252.728861             |             |             |
| 4417.229027             |              | -0.441619662                                          | 0.001546499    | 0.01779832              |             | USP10       |
|                         | 16           | 84699978                                              | 84779922       | +                       | 5083        |             |
| protein_coding          |              | ubiquitin specific peptidase 10                       | [Source:HGNC   |                         |             |             |
| Symbol;Acc:HGNC:12608]  | -            | 3582                                                  | 3558           | 2890                    | 3616        | 4177        |
|                         | 5492         | 34.50914151                                           | 33.16746464    | 35.37403325             |             |             |
| 39.52941214             |              | 50.51166983                                           | 50.23905214    |                         |             |             |
| ENSG00000182580         |              | 131.5513901                                           | 66.37463648    | 156.9363727             |             |             |
| 34.18696033             |              | 57.07459141                                           | 13.80222472    | 118.2874664             |             |             |
| 35.02125882             |              | 1.764392909                                           | 0.001556397    | 0.017900587             |             | EPHB3       |
|                         | 3            | 184561784                                             | 184582409      | +                       | 4532        |             |
| protein_coding          |              | EPH receptor B3                                       | [Source:HGNC   | Symbol;Acc:HGNC:3394]   |             |             |
|                         | -            | 145                                                   | 75             | 135                     | 33          | 50          |
| 1.566775546             |              | 0.784147574                                           | 1.853321287    | 0.404609506             |             |             |
| 0.67815265              |              | 0.16415764                                            |                |                         |             |             |
| ENSG00000089220         |              | 4132.52815                                            | 4501.970344    | 4823.177855             |             |             |
| 3160.739878             |              | 3656.198326                                           | 3257.325035    | 4485.892116             |             |             |
| 3358.087746             |              | 0.41775689                                            | 0.001557624    | 0.017903065             |             | PEBP1       |
|                         | 12           | 118135858                                             | 118145584      | +                       | 1780        |             |
| protein_coding          |              | phosphatidylethanolamine binding protein 1            | [Source:HGNC   | Symbol;Acc:HGNC:8630]   | -           | 4555        |
|                         | 3051         | 3203                                                  | 3776           | 125.3132699             | 135.4154372 | 4149        |
| 145.0207942             |              | 95.24325932                                           | 110.6074287    | 98.63771464             |             |             |
| ENSG00000128524         |              | 748.4820469                                           | 1055.799218    | 902.0935203             |             |             |
| 1025.60881              |              | 1495.354295                                           | 1808.091439    | 902.1249283             |             |             |
| 1443.018181             |              | -0.678035678                                          | 0.001561109    | 0.017921501             |             |             |
| ATP6V1F                 | 7            | 128862826                                             | 128865844      | +                       | 789         |             |
| protein_coding          |              | ATPase H+ transporting V1 subunit F                   | [Source:HGNC   |                         |             |             |
| Symbol;Acc:HGNC:16832]  | -            | 825                                                   | 1193           | 776                     | 990         | 1310        |
|                         | 2096         | 51.20420515                                           | 71.64565893    | 61.19156557             |             |             |
| 69.72206398             |              | 102.0567309                                           | 123.5222783    |                         |             |             |
| ENSG00000047410         |              | 5820.014947                                           | 4245.32175     | 4591.842017             |             |             |
| 4078.607964             |              | 3236.129333                                           | 2735.428413    | 4885.726238             |             |             |
| 3350.055237             |              | 0.544634803                                           | 0.001562266    | 0.017921501             |             | TPR         |
|                         | 1            | 186311652                                             | 186375693      | -                       | 12350       |             |
| protein_coding          |              | "translocated promoter region, nuclear basket protein | [Source:HGNC   | Symbol;Acc:HGNC:12017]" | -           | 6415        |
|                         |              |                                                       |                |                         |             | 4797        |
|                         |              |                                                       |                |                         |             | 3950        |

|                                             |                                                 |         |             |                        |        |
|---------------------------------------------|-------------------------------------------------|---------|-------------|------------------------|--------|
| 3937                                        | 2835                                            | 3171    | 25.43656053 | 18.40471945            |        |
| 19.89926267                                 | 17.71374958                                     |         | 14.11020963 | 11.93878971            |        |
| ENSG00000148308                             | 1200.293028                                     |         | 1428.382177 | 1288.040748            |        |
| 1630.614411                                 | 1864.056155                                     |         | 1999.597307 | 1305.571984            |        |
| 1831.422624                                 | -0.488382027                                    |         | 0.001562268 | 0.017921501            | GTF3C5 |
| 9                                           | 133030675                                       |         | 133058503   | + 3592                 |        |
| protein_coding                              | general transcription factor IIIC subunit 5     |         |             |                        |        |
| [Source:HGNC Symbol;Acc:HGNC:4668]          |                                                 |         | -           | 1323 1614              | 1108   |
| 1574                                        | 1633 2318                                       |         | 18.03649724 | 21.29088152            |        |
| 19.19156004                                 | 24.34896154                                     |         | 27.94455621 | 30.00600116            |        |
| ENSG00000116863                             | 1487.891584                                     |         | 2149.653227 | 1668.175518            |        |
| 2193.145304                                 | 2690.496239                                     |         | 2875.175938 | 1768.573443            |        |
| 2586.272494                                 | -0.548178051                                    |         | 0.001567067 | 0.017964907            |        |
| ADPRHL2 1                                   | 36088875                                        |         | 36093932    | + 1668                 |        |
| protein_coding                              | ADP-ribosylhydrolyase like 2 [Source:HGNC       |         |             |                        |        |
| Symbol;Acc:HGNC:21304]                      |                                                 |         | -           | 1640 2429 1435 2117    | 2357   |
| 3333                                        | 48.14780415                                     |         | 69.0014011  | 53.52574261            |        |
| 70.52398678                                 | 86.85821427                                     |         | 92.91167413 |                        |        |
| ENSG00000166681                             | 1981.43611                                      |         | 3203.682454 | 2808.579826            |        |
| 1777.721937                                 | 1843.509302                                     |         | 1819.305746 | 2664.56613             |        |
| 1813.512329                                 | 0.55505244                                      |         | 0.001569665 | 0.017975038            | BEX3   |
| X                                           | 103376340                                       |         | 103378077   | + 1080                 |        |
| protein_coding                              | brain expressed X-linked 3 [Source:HGNC         |         |             |                        |        |
| Symbol;Acc:HGNC:13388]                      |                                                 |         | -           | 2184 3620 2416 1716    | 1615   |
| 2109                                        | 99.02789833                                     |         | 158.8222177 | 139.181022             |        |
| 88.28879139                                 | 91.91706138                                     |         | 90.79958057 |                        |        |
| ENSG00000160570                             | 596.0638846                                     |         | 1054.029227 | 956.7306279            |        |
| 996.6016921                                 | 1640.323757                                     |         | 1780.486989 | 868.9412466            |        |
| 1472.470813                                 | -0.761375872                                    |         | 0.001569983 | 0.017975038            | DEDD2  |
| 19                                          | 42198598                                        |         | 42220140    | - 2631                 |        |
| protein_coding                              | death effector domain containing 2 [Source:HGNC |         |             |                        |        |
| Symbol;Acc:HGNC:24450]                      |                                                 |         | -           | 657 1191 823 962       | 1437   |
| 2064                                        | 12.22850048                                     |         | 21.44950895 | 19.46192675            |        |
| 20.31731283                                 | 33.5724689                                      |         | 36.47706298 |                        |        |
| ENSG00000131849                             | 354.7351277                                     |         | 289.3934151 | 244.1232465            |        |
| 529.3799009                                 | 455.4552394                                     |         | 486.5284215 | 296.0839297            |        |
| 490.4545206                                 | -0.726433245                                    |         | 0.001571996 | 0.017986442            | ZNF132 |
| 19                                          | 58432814                                        |         | 58440222    | - 3527                 |        |
| protein_coding                              | zinc finger protein 132 [Source:HGNC            |         |             |                        |        |
| Symbol;Acc:HGNC:12916]                      | zf-C2H2                                         | 391 327 |             | 210 511                | 399    |
| 564                                         | 5.428751736                                     |         | 4.393076174 | 3.704423936            |        |
| 8.050585822                                 | 6.953681523                                     |         | 7.43540557  |                        |        |
| ENSG00000166402                             | 419.1499463                                     |         | 373.4679546 | 346.4225117            |        |
| 278.6755251                                 | 133.5545439                                     |         | 186.3300338 | 379.6801375            |        |
| 199.5200343                                 | 0.927835702                                     |         | 0.001580791 | 0.018075376            | TUB    |
| 11                                          | 8019244 8106112                                 |         | + 6722      | protein_coding         | tubby  |
| bipartite transcription factor [Source:HGNC |                                                 |         |             | Symbol;Acc:HGNC:12406] |        |
| Tub                                         | 462 422                                         |         | 298 269     | 117 216                |        |
| 3.3656748                                   | 2.974680891                                     |         | 2.758192686 | 2.22364685             |        |
| 1.069879125                                 | 1.49412269                                      |         |             |                        |        |

|                        |                                                       |             |             |        |
|------------------------|-------------------------------------------------------|-------------|-------------|--------|
| ENSG00000145715        | 2435.968844                                           | 1813.355069 | 1982.048263 |        |
| 1782.90178             | 1172.312108                                           | 1016.188795 | 2077.124058 |        |
| 1323.800894            | 0.650304234                                           | 0.001583134 | 0.018090476 | RASA1  |
| 5                      | 87267888                                              | 87391931    | + 5232      |        |
| protein_coding         | RAS p21 protein activator 1 [Source:HGNC              |             |             |        |
| Symbol;Acc:HGNC:9871]  | -                                                     | 2685 2049   | 1705 1721   | 1027   |
| 1178                   | 25.13073776                                           | 18.55669646 | 20.27512286 |        |
| 18.27785294            | 12.06563181                                           | 10.46908132 |             |        |
| ENSG00000167700        | 363.8076374                                           | 407.9827656 | 385.9472278 |        |
| 158.5031797            | 160.9503478                                           | 293.2972754 | 385.9125436 |        |
| 204.2502676            | 0.914212205                                           | 0.001584359 | 0.018092783 | MFSD3  |
| 8                      | 144509074                                             | 144511213   | + 1823      |        |
| protein_coding         | major facilitator superfamily domain containing 3     |             |             |        |
| [Source:HGNC           | Symbol;Acc:HGNC:25157]                                | -           | 401 461     | 332    |
| 153                    | 141 340                                               | 10.77175303 | 11.98231404 |        |
| 11.33073967            | 4.663551809                                           | 4.754225796 | 8.672079819 |        |
| ENSG00000198464        | 310.2798304                                           | 230.0987398 | 291.7854041 |        |
| 158.5031797            | 158.6673641                                           | 133.709052  | 277.3879914 |        |
| 150.2931986            | 0.884975667                                           | 0.001590291 | 0.018132506 | ZNF480 |
| 19                     | 52297177                                              | 52325922    | + 4836      |        |
| protein_coding         | zinc finger protein 480 [Source:HGNC                  |             |             |        |
| Symbol;Acc:HGNC:23305] | zf-C2H2                                               | 342 260     | 251 153     | 139    |
| 155                    | 3.463127631                                           | 2.547495917 | 3.229195034 |        |
| 1.757993165            | 1.766753125                                           | 1.490309343 |             |        |
| ENSG00000196550        | 247.6795137                                           | 190.2739579 | 202.2735471 |        |
| 137.7838098            | 78.76293614                                           | 85.40126548 | 213.4090062 |        |
| 100.6493371            | 1.084800836                                           | 0.001590362 | 0.018132506 | FAM72A |
| 1                      | 206186179                                             | 206204414   | - 3783      |        |
| protein_coding         | family with sequence similarity 72 member A           |             |             |        |
| [Source:HGNC           | Symbol;Acc:HGNC:24044]                                | -           | 273 215     | 174    |
| 133                    | 69 99                                                 | 3.533905967 | 2.692951671 |        |
| 2.861671337            | 1.953562649                                           | 1.121140676 | 1.216829897 |        |
| ENSG00000132842        | 1879.824002                                           | 1369.972497 | 1812.324482 |        |
| 1342.615169            | 1100.398122                                           | 884.2050214 | 1687.37366  |        |
| 1109.072771            | 0.605736262                                           | 0.001590912 | 0.018132506 | AP3B1  |
| 5                      | 78000525                                              | 78294755    | - 7310      |        |
| protein_coding         | adaptor related protein complex 3 subunit beta 1      |             |             |        |
| [Source:HGNC           | Symbol;Acc:HGNC:566]                                  | -           | 2072 1548   | 1559   |
| 1296                   | 964 1025                                              | 13.88037047 | 10.03413686 |        |
| 13.26892028            | 9.851438902                                           | 8.106007797 | 6.519848535 |        |
| ENSG00000179134        | 4030.916042                                           | 3850.613911 | 4076.858216 |        |
| 4947.785532            | 5041.969405                                           | 5751.214515 | 3986.12939  |        |
| 5246.989817            | -0.39673843                                           | 0.001606804 | 0.018301835 | SAMD4B |
| 19                     | 39342396                                              | 39385710    | + 8057      |        |
| protein_coding         | sterile alpha motif domain containing 4B [Source:HGNC |             |             |        |
| Symbol;Acc:HGNC:25492] | -                                                     | 4443 4351   | 3507 4776   | 4417   |
| 6667                   | 27.00421973                                           | 25.58834282 | 27.08128383 |        |
| 32.93843784            | 33.69778816                                           | 38.47583996 |             |        |
| ENSG00000139734        | 1845.348465                                           | 1509.801731 | 1954.148463 |        |
| 944.8032674            | 465.7286659                                           | 270.8686602 | 1769.76622  |        |



|                                                 |                                                   |             |                       |        |
|-------------------------------------------------|---------------------------------------------------|-------------|-----------------------|--------|
| 560.4668645                                     | 1.659123295                                       | 0.001611012 | 0.01832721            | DIAPH3 |
| 13                                              | 59665583                                          | 60163987    | - 7442                |        |
| protein_coding                                  | diaphanous related formin 3 [Source:HGNC          |             |                       |        |
| Symbol;Acc:HGNC:15480]                          | -                                                 | 2034 1706   | 1681 912              | 408    |
| 314                                             | 13.38412446                                       | 10.86215015 | 14.05351283           |        |
| 6.809531235                                     | 3.369906549                                       | 1.961873498 |                       |        |
| ENSG00000166451                                 | 1127.712951                                       | 975.2646587 | 882.3311623           |        |
| 805.983489                                      | 553.6235367                                       | 342.467701  | 995.1029239           |        |
| 567.3582422                                     | 0.812046068                                       | 0.001613081 | 0.01832721            | CENPN  |
| 16                                              | 81006498                                          | 81033114    | + 3568                |        |
| protein_coding                                  | centromere protein N [Source:HGNC                 |             |                       |        |
| Symbol;Acc:HGNC:30873]                          | -                                                 | 1243 1102   | 759 778               | 485    |
| 397                                             | 17.0598405                                        | 14.63467862 | 13.23499485           |        |
| 12.11621008                                     | 8.355342423                                       | 5.173645641 |                       |        |
| ENSG00000204899                                 | 2427.803585                                       | 2472.676458 | 2597.006346           |        |
| 1972.484014                                     | 1907.432845                                       | 1645.052659 | 2499.16213            |        |
| 1841.656506                                     | 0.440712461                                       | 0.001613543 | 0.01832721            | MZT1   |
| 13                                              | 72708357                                          | 72727687    | - 2299                |        |
| protein_coding                                  | mitotic spindle organizing protein 1 [Source:HGNC |             |                       |        |
| Symbol;Acc:HGNC:33830]                          | -                                                 | 2676 2794   | 2234 1904             | 1671   |
| 1907                                            | 57.00012675                                       | 57.5855967  | 60.45761966           |        |
| 46.01930086                                     | 44.67708597                                       | 38.5693873  |                       |        |
| ENSG00000132646                                 | 4320.3291                                         | 4287.801517 | 4565.104709           |        |
| 3658.004756                                     | 3184.762201                                       | 3071.85764  | 4391.078442           |        |
| 3304.874865                                     | 0.409984198                                       | 0.001613548 | 0.01832721            | PCNA   |
| 20                                              | 5114953 5126626                                   | - 1471      | protein_coding        |        |
| proliferating cell nuclear antigen [Source:HGNC |                                                   |             | Symbol;Acc:HGNC:8729] |        |
| -                                               | 4762 4845                                         | 3927 3531   | 2790 3561             |        |
| 158.5277888                                     | 156.0657305                                       | 166.0944325 | 133.381958            |        |
| 116.5839836                                     | 112.5616159                                       |             |                       |        |
| ENSG00000060138                                 | 3237.978698                                       | 3655.029982 | 4294.244155           |        |
| 4792.390257                                     | 5322.776395                                       | 5105.960509 | 3729.084278           |        |
| 5073.709054                                     | -0.444543494                                      | 0.001614212 | 0.01832721            | YBX3   |
| 12                                              | 10699089                                          | 10723312    | - 8610                |        |
| protein_coding                                  | Y-box binding protein 3 [Source:HGNC              |             |                       |        |
| Symbol;Acc:HGNC:2428]                           | CSD                                               | 3569 4130   | 3694 4626             | 4663   |
| 5919                                            | 20.29888018                                       | 22.7286343  | 26.69319667           |        |
| 29.85482437                                     | 33.28968028                                       | 31.96511025 |                       |        |
| ENSG00000173540                                 | 601.5073904                                       | 718.6160643 | 568.4584168           |        |
| 404.027713                                      | 336.7400893                                       | 449.4349426 | 629.5272905           |        |
| 396.7342483                                     | 0.665318321                                       | 0.001617207 | 0.01834944            | GMPPB  |
| 3                                               | 49716844                                          | 49723951    | - 6742                |        |
| protein_coding                                  | GDP-mannose pyrophosphorylase B [Source:HGNC      |             |                       |        |
| Symbol;Acc:HGNC:22932]                          | -                                                 | 663 812     | 489 390               | 295    |
| 521                                             | 4.815633908                                       | 5.706814051 | 4.512601231           |        |
| 3.214311059                                     | 2.689556227                                       | 3.593188435 |                       |        |
| ENSG00000135052                                 | 1809.058426                                       | 1899.199599 | 2145.959586           |        |
| 1652.369749                                     | 1148.340779                                       | 1196.480356 | 1951.40587            |        |
| 1332.396961                                     | 0.550249562                                       | 0.001621898 | 0.018390866           | GOLM1  |
| 9                                               | 86026146                                          | 86100173    | - 4233                |        |

|                                 |                                                  |             |             |             |             |                |      |
|---------------------------------|--------------------------------------------------|-------------|-------------|-------------|-------------|----------------|------|
| protein_coding                  | golgi membrane protein 1 [Source:HGNC            |             |             |             |             |                |      |
| Symbol;Acc:HGNC:15451]          | -                                                | 1994        | 2146        | 1846        | 1595        | 1006           |      |
|                                 | 1387                                             | 23.06776769 | 24.02192961 | 27.13252893 |             |                |      |
| 20.93748256                     |                                                  | 14.60821232 | 15.23558768 |             |             |                |      |
| ENSG00000138172                 | 502.6170352                                      |             | 453.1175184 | 669.5951903 |             |                |      |
| 262.1000292                     | 413.2200418                                      |             | 230.3246251 | 541.7765813 |             |                |      |
| 301.8815654                     | 0.845035113                                      |             | 0.001624391 | 0.018407332 |             | CALHM2         |      |
|                                 | 10                                               | 103446786   | 103452402   | -           | 3108        |                |      |
| protein_coding                  | calcium homeostasis modulator family member 2    |             |             |             |             |                |      |
| [Source:HGNC                    | Symbol;Acc:HGNC:23493]                           | -           | 554         | 512         |             | 576            |      |
|                                 | 253                                              | 362         | 267         | 8.728858194 | 7.805763551 |                |      |
| 11.53050477                     | 4.523260028                                      |             | 7.159371863 | 3.994489366 |             |                |      |
| ENSG00000100151                 | 455.4399849                                      |             | 597.3717284 | 337.1225785 |             |                |      |
| 766.6166862                     | 636.9524401                                      |             | 948.9029498 | 463.3114306 |             |                |      |
| 784.1573587                     | -0.758136024                                     |             | 0.001629598 | 0.018447962 |             | PICK1          |      |
|                                 | 22                                               | 38056311    | 38075701    | +           | 4371        |                |      |
| protein_coding                  | protein interacting with PRKCA 1 [Source:HGNC    |             |             |             |             |                |      |
| Symbol;Acc:HGNC:9394]           | -                                                | 502         | 675         | 290         | 740         | 558            |      |
|                                 | 1100                                             | 5.624081353 | 7.317275506 | 4.127851243 |             |                |      |
| 9.407255875                     | 7.846947603                                      |             | 11.70153664 |             |             |                |      |
| ENSG00000142552                 | 2320.747971                                      |             | 3276.252057 | 4167.532565 |             |                |      |
| 1516.657877                     | 2618.582254                                      |             | 1936.624657 | 3254.844198 |             |                |      |
| 2023.954929                     | 0.685367887                                      |             | 0.001630062 | 0.018447962 |             | RCN3           |      |
|                                 | 19                                               | 49527618    | 49546962    | +           | 2093        |                |      |
| protein_coding                  | reticulocalbin 3 [Source:HGNC                    |             |             |             |             |                |      |
| Symbol;Acc:HGNC:21145]          | -                                                | 2558        | 3702        | 3585        | 1464        | 2294           | 2245 |
| 59.8494268                      | 83.80957279                                      |             | 106.5679909 | 38.867257   |             |                |      |
| 67.37077533                     | 49.8744518                                       |             |             |             |             |                |      |
| ENSG00000115266                 | 564.3101008                                      |             | 799.1506233 | 632.3954575 |             |                |      |
| 863.9977247                     | 1124.369451                                      |             | 1074.84825  | 665.2853939 |             |                |      |
| 1021.071809                     | -0.61757339                                      |             | 0.001639494 | 0.018542842 |             | APC2           |      |
|                                 | 19                                               | 1446302     | 1473244     | +           | 12610       | protein_coding |      |
| WNT signaling pathway regulator | [Source:HGNC                                     |             |             |             |             |                |      |
| Symbol;Acc:HGNC:24036]"         | -                                                | 622         | 903         | 544         | 834         | 985            | 1246 |
| 2.41548298                      | 3.393119106                                      |             | 2.684050358 | 3.675047932 |             |                |      |
| 4.80140681                      | 4.5944547                                        |             |             |             |             |                |      |
| ENSG00000131094                 | 799.288101                                       |             | 1410.682274 | 1278.740815 |             |                |      |
| 862.9617563                     | 695.1685234                                      |             | 523.6219005 | 1162.90373  |             |                |      |
| 693.9173934                     | 0.745413755                                      |             | 0.001648482 | 0.018632584 |             | C1QL1          |      |
|                                 | 17                                               | 44959693    | 44968071    | -           | 1295        |                |      |
| protein_coding                  | complement C1q like 1 [Source:HGNC               |             |             |             |             |                |      |
| Symbol;Acc:HGNC:24182]          | -                                                | 881         | 1594        | 1100        | 833         | 609            |      |
|                                 | 607                                              | 33.3146169  | 58.32368953 | 52.84814688 |             |                |      |
| 35.74269347                     | 28.90645833                                      |             | 21.79465209 |             |             |                |      |
| ENSG00000125971                 | 2514.899678                                      |             | 2605.425731 | 2923.666499 |             |                |      |
| 3295.415782                     | 3978.099021                                      |             | 3594.616902 | 2681.330636 |             |                |      |
| 3622.710568                     | -0.43431527                                      |             | 0.001650454 | 0.018642964 |             |                |      |
| DYNLRB1                         | 20                                               | 34516409    | 34540958    | +           | 2460        |                |      |
| protein_coding                  | dynein light chain roadblock-type 1 [Source:HGNC |             |             |             |             |                |      |
| Symbol;Acc:HGNC:15468]          | -                                                | 2772        | 2944        | 2515        | 3181        | 3485           |      |

|                                     |      |                                                      |             |             |             |
|-------------------------------------|------|------------------------------------------------------|-------------|-------------|-------------|
|                                     | 4167 | 55.18064879                                          | 56.70601643 | 63.60770538 |             |
| 71.85228861                         |      | 87.07932131                                          | 78.76248528 |             |             |
| ENSG00000138764                     |      | 379.2309038                                          | 243.3736671 | 496.3839345 |             |
| 218.5893524                         |      | 202.0440536                                          | 159.5882234 | 372.9961685 |             |
| 193.4072098                         |      | 0.946982786                                          | 0.001652801 | 0.018657557 | CCNG2       |
|                                     | 4    | 77157151                                             | 77433388    | + 7471      |             |
| protein_coding                      |      | cyclin G2 [Source:HGNC Symbol;Acc:HGNC:1593]         |             |             | -           |
|                                     | 418  | 275                                                  | 427         | 211         | 177         |
|                                     |      | 185                                                  | 2.73984648  |             |             |
|                                     |      | 1.744136209                                          | 3.55595278  | 1.569335368 | 1.456269957 |
|                                     |      | 1.151394128                                          |             |             |             |
| ENSG00000175505                     |      | 234.0707492                                          | 205.3188755 | 267.3730795 |             |
| 133.6399358                         |      | 127.8470848                                          | 54.34625985 | 235.5875681 |             |
| 105.2777602                         |      | 1.166107264                                          | 0.001657526 | 0.018694278 | CLCF1       |
|                                     | 11   | 67364168                                             | 67374177    | - 1975      |             |
| protein_coding                      |      | cardiotrophin like cytokine factor 1 [Source:HGNC    |             |             |             |
| Symbol;Acc:HGNC:17412]              |      | -                                                    | 258         | 232         | 230         |
|                                     | 63   | 6.397072748                                          | 5.566052851 | 7.245487018 | 129         |
|                                     |      | 3.629398488                                          | 3.485766429 | 1.483216225 | 112         |
| ENSG00000188120                     |      | 450.9037301                                          | 163.7241033 | 205.761022  |             |
| 138.8197783                         |      | 122.1396256                                          | 92.30237784 | 273.4629518 |             |
| 117.7539273                         |      | 1.21801128                                           | 0.001658167 | 0.018694278 | DAZ1        |
|                                     | Y    | 23129355                                             | 23199094    | - 4787      |             |
| protein_coding                      |      | deleted in azoospermia 1 [Source:HGNC                |             |             |             |
| Symbol;Acc:HGNC:2682]               |      | -                                                    | 497         | 185         | 177         |
|                                     | 107  | 5.08418851                                           | 1.831195624 | 2.30047059  | 134         |
|                                     |      | 1.555440542                                          | 1.373939819 | 1.039324987 | 107         |
| ENSG00000181104                     |      | 2406.029562                                          | 2123.103372 | 3012.015865 |             |
| 1792.225496                         |      | 1888.027484                                          | 1604.508624 | 2513.716266 |             |
| 1761.587201                         |      | 0.512731048                                          | 0.001660722 | 0.018711152 | F2R         |
|                                     | 5    | 76716043                                             | 76735781    | + 4066      |             |
| protein_coding                      |      | coagulation factor II thrombin receptor [Source:HGNC |             |             |             |
| Symbol;Acc:HGNC:3537]               |      | -                                                    | 2652        | 2399        | 2591        |
|                                     | 1860 | 31.93999391                                          | 27.95691941 | 39.64668546 | 1730        |
|                                     |      | 23.64235709                                          | 25.0043455  | 21.2704456  | 1654        |
| ENSG00000131943                     |      | 944.4482556                                          | 1154.918675 | 953.2431529 |             |
| 1299.104493                         |      | 1465.675507                                          | 1625.211961 | 1017.536694 |             |
| 1463.330654                         |      | -0.524043372                                         | 0.001662562 | 0.01871996  |             |
| C19orf12                            |      | 19                                                   | 29698886    | 29715789    | -           |
|                                     |      |                                                      |             |             | 5378        |
| protein_coding                      |      | chromosome 19 open reading frame 12                  |             |             |             |
| [Source:HGNC Symbol;Acc:HGNC:25443] |      | -                                                    | 1041        | 1305        | 820         |
|                                     | 1254 | 1284                                                 | 1884        | 9.478914702 | 11.49783719 |
|                                     |      | 9.486366538                                          | 12.95653231 | 14.67545537 | 16.28887606 |
| ENSG00000102981                     |      | 129.7368881                                          | 127.439302  | 151.1239145 |             |
| 193.7261085                         |      | 336.7400893                                          | 267.418104  | 136.1000349 |             |
| 265.961434                          |      | -0.96730216                                          | 0.001666029 | 0.018747064 | PARD6A      |
|                                     | 16   | 67660946                                             | 67662778    | + 1488      |             |
| protein_coding                      |      | par-6 family cell polarity regulator alpha           |             |             |             |
| [Source:HGNC Symbol;Acc:HGNC:15943] |      | -                                                    | 143         | 144         | 130         |
|                                     | 187  | 295                                                  | 310         | 4.706106919 | 4.585492651 |
|                                     |      | 5.435597218                                          | 6.983139517 | 12.18614791 | 9.687010729 |

|                                     |                                                     |             |                |                       |             |
|-------------------------------------|-----------------------------------------------------|-------------|----------------|-----------------------|-------------|
| ENSG00000155660                     | 4615.185664                                         | 4619.674699 | 4777.840681    |                       |             |
| 4348.995742                         | 2203.079228                                         | 2290.306665 | 4670.900348    |                       |             |
| 2947.460545                         | 0.664269534                                         | 0.001667954 | 0.01875679     | PDIA4                 |             |
| 7                                   | 149003062                                           | 149028641   | - 3277         |                       |             |
| protein_coding                      | protein disulfide isomerase family A member 4       |             |                |                       |             |
| [Source:HGNC Symbol;Acc:HGNC:30167] | -                                                   | 5087        | 5220           | 4110                  |             |
| 4198                                | 1930                                                | 2655        | 76.01756949    | 75.47802062           |             |
| 78.03190816                         | 71.1832867                                          | 36.20163854 | 37.67203684    |                       |             |
| ENSG00000204396                     | 15.42326642                                         | 11.50493699 | 10.46242485    | 0                     |             |
| 0                                   | 0                                                   | 12.46354275 | 0              | 6.073603644           |             |
| 0.00167385                          | 0.018811141                                         | VWA7        | 6              | 31765590              |             |
| 31777294                            | -                                                   | 3638        | protein_coding | von Willebrand factor |             |
| A domain containing 7               | [Source:HGNC Symbol;Acc:HGNC:13939]                 |             |                | -                     |             |
| 17                                  | 13                                                  | 9           | 0              | 0                     | 0.228831027 |
| 0.169319547                         | 0.153917025                                         | 0           | 0              | 0                     |             |
| ENSG00000132382                     | 5554.190414                                         | 5702.023772 | 4776.678189    |                       |             |
| 6232.386465                         | 7218.794321                                         | 8823.934794 | 5344.297458    |                       |             |
| 7425.038527                         | -0.474382699                                        | 0.001683348 | 0.01890587     |                       |             |
| MYBBP1A 17                          | 4538897                                             | 4555631     | - 6203         | protein_coding        | MYB         |
| binding protein 1a                  | [Source:HGNC Symbol;Acc:HGNC:7546]                  |             |                | -                     | 6122        |
| 6443                                | 4109                                                | 6016        | 6324           | 10229                 | 48.33038198 |
| 49.21673403                         | 41.21366216                                         | 53.89122927 | 62.6667887     |                       |             |
| 76.67652381                         |                                                     |             |                |                       |             |
| ENSG00000163872                     | 1358.154696                                         | 1113.323903 | 1598.426019    |                       |             |
| 850.5301343                         | 1028.484137                                         | 860.9137672 | 1356.634872    |                       |             |
| 913.3093462                         | 0.570624932                                         | 0.001690698 | 0.018976363    | YEATS2                |             |
| 3                                   | 183697818                                           | 183812625   | + 10212        |                       |             |
| protein_coding                      | YEATS domain containing 2 [Source:HGNC              |             |                |                       |             |
| Symbol;Acc:HGNC:25489]              | -                                                   | 1497        | 1258           | 1375                  | 821         |
| 998                                 | 7.17859873                                          | 5.837088471 | 8.377197195    | 901                   |             |
| 4.467292556                         | 5.42327148                                          | 4.544130062 |                |                       |             |
| ENSG00000105835                     | 3894.828397                                         | 4626.754661 | 4847.59018     |                       |             |
| 5722.689966                         | 6053.331165                                         | 6005.693033 | 4456.391079    |                       |             |
| 5927.238055                         | -0.411671604                                        | 0.001693623 | 0.018997148    | NAMPT                 |             |
| 7                                   | 106248285                                           | 106286326   | - 9049         |                       |             |
| protein_coding                      | nicotinamide phosphoribosyltransferase [Source:HGNC |             |                |                       |             |
| Symbol;Acc:HGNC:30092]              | -                                                   | 4293        | 5228           | 4170                  | 5524        |
| 6962                                | 23.23212757                                         | 27.37546038 | 28.67096519    | 5303                  |             |
| 33.92072495                         | 36.02204788                                         | 35.77374845 |                |                       |             |
| ENSG00000101199                     | 2948.565639                                         | 3479.800942 | 2440.069973    |                       |             |
| 3362.753734                         | 4471.223491                                         | 5351.812637 | 2956.145518    |                       |             |
| 4395.263287                         | -0.57206865                                         | 0.001694895 | 0.018999368    |                       |             |
| ARFGAP1 20                          | 63272785                                            | 63289793    | + 6613         |                       |             |
| protein_coding                      | ADP ribosylation factor GTPase activating protein 1 |             |                |                       |             |
| [Source:HGNC Symbol;Acc:HGNC:15852] | -                                                   | 3250        | 3932           | 2099                  |             |
| 3246                                | 3917                                                | 6204        | 24.0665325     | 28.17354051           |             |
| 19.74789287                         | 27.274829                                           | 36.40846834 | 43.62187054    |                       |             |
| ENSG00000112299                     | 12.70151352                                         | 14.15992245 | 6.974949899    |                       |             |
| 64.23004668                         | 23.97132839                                         | 75.91223598 | 11.27879529    |                       |             |
| 54.70453702                         | -2.270906677                                        | 0.00171309  | 0.019186277    | VNN1                  |             |

|                        |                                                    |             |             |            |       |
|------------------------|----------------------------------------------------|-------------|-------------|------------|-------|
| 6                      | 132681590                                          | 132714049   | -           | 3106       |       |
| protein_coding         | vanin 1 [Source:HGNC Symbol;Acc:HGNC:12705]        |             |             |            | -     |
| 14                     | 16                                                 | 6           | 62          | 21         | 88    |
|                        | 0.244087181                                        | 0.120186765 | 1.109180643 | 0.41559011 |       |
|                        | 1.317383558                                        |             |             |            |       |
| ENSG00000186352        | 135.1803939                                        | 130.9792827 | 192.9736139 |            |       |
| 50.76245625            | 58.21608324                                        | 84.53862644 | 153.0444302 |            |       |
| 64.50572197            | 1.240329106                                        | 0.001713738 | 0.019186277 |            |       |
| ANKRD37 4              | 185396021                                          | 185400628   | +           | 2580       |       |
| protein_coding         | ankyrin repeat domain 37 [Source:HGNC              |             |             |            |       |
| Symbol;Acc:HGNC:29593] | -                                                  | 149         | 148         | 166        | 49    |
| 98                     | 2.828103153                                        | 2.718118899 | 4.003088842 |            | 51    |
| 1.055330325            | 1.215060297                                        | 1.766189863 |             |            |       |
| ENSG00000137337        | 1868.029739                                        | 1768.220316 | 1961.123413 |            |       |
| 1442.068145            | 1343.535882                                        | 1336.227881 | 1865.791156 |            |       |
| 1373.943969            | 0.44126676                                         | 0.001720057 | 0.019244834 |            | MDC1  |
| 6                      | 30699807                                           | 30717889    | -           | 8064       |       |
| protein_coding         | mediator of DNA damage checkpoint 1 [Source:HGNC   |             |             |            |       |
| Symbol;Acc:HGNC:21163] | -                                                  | 2059        | 1998        | 1687       | 1392  |
| 1549                   | 12.50358386                                        | 11.74008944 | 13.01581629 |            | 1177  |
| 9.591814249            | 8.971670272                                        | 8.931654535 |             |            |       |
| ENSG00000132600        | 774.7923249                                        | 869.9502355 | 943.9432197 |            |       |
| 1045.292211            | 1275.046372                                        | 1564.827228 | 862.8952601 |            |       |
| 1295.055271            | -0.58683505                                        | 0.001728652 | 0.019328772 |            | PRMT7 |
| 16                     | 68310974                                           | 68358563    | +           | 9458       |       |
| protein_coding         | protein arginine methyltransferase 7 [Source:HGNC  |             |             |            |       |
| Symbol;Acc:HGNC:25557] | -                                                  | 854         | 983         | 812        | 1009  |
| 1814                   | 4.421679342                                        | 4.924709859 | 5.341504101 |            | 1117  |
| 5.927941378            | 7.2594083                                          | 8.918031277 |             |            |       |
| ENSG00000133134        | 17.23776835                                        | 11.50493699 | 12.78740815 |            |       |
| 61.1221412             | 43.37668947                                        | 62.11001126 | 13.84337116 |            |       |
| 55.53628064            | -2.004005275                                       | 0.001733972 | 0.019366657 |            | BEX2  |
| X                      | 103309346                                          | 103311046   | -           | 1176       |       |
| protein_coding         | brain expressed X-linked 2 [Source:HGNC            |             |             |            |       |
| Symbol;Acc:HGNC:30933] | -                                                  | 19          | 13          | 11         | 59    |
| 72                     | 0.791179385                                        | 0.523796354 | 0.58195876  |            | 38    |
| 2.787768673            | 1.986203007                                        | 2.84679499  |             |            |       |
| ENSG00000173692        | 3814.083061                                        | 3329.351766 | 3997.808784 |            |       |
| 2782.611377            | 2846.880619                                        | 2738.01633  | 3713.74787  |            |       |
| 2789.169442            | 0.412887456                                        | 0.001734229 | 0.019366657 |            | PSMD1 |
| 2                      | 231056864                                          | 231172827   | +           | 5187       |       |
| protein_coding         | "proteasome 26S subunit, non-ATPase 1 [Source:HGNC |             |             |            |       |
| Symbol;Acc:HGNC:9554]" | -                                                  | 4204        | 3762        | 3439       | 2686  |
| 3174                   | 39.68945569                                        | 34.36599986 | 41.24988807 |            | 2494  |
| 28.77410367            | 29.55476846                                        | 28.45258258 |             |            |       |
| ENSG00000110400        | 303.9290736                                        | 272.5785072 | 332.4726119 |            |       |
| 190.6182031            | 158.6673641                                        | 164.7640576 | 302.9933975 |            |       |
| 171.3498749            | 0.821403796                                        | 0.00173625  | 0.019366989 |            |       |
| NECTIN1 11             | 119623408                                          | 119729084   | -           | 7701       |       |
| protein_coding         | nectin cell adhesion molecule 1 [Source:HGNC       |             |             |            |       |

|                                                                   |                                                  |             |             |                |                |        |
|-------------------------------------------------------------------|--------------------------------------------------|-------------|-------------|----------------|----------------|--------|
| Symbol;Acc:HGNC:9706]                                             | -                                                | 335         | 308         | 286            | 184            | 139    |
| 191                                                               | 2.130229365                                      | 1.895090847 | 2.310605253 |                |                |        |
| 1.327647382                                                       | 1.109468655                                      | 1.153233533 |             |                |                |        |
| ENSG00000116675                                                   | 398.2831741                                      | 407.0977704 | 433.6093854 |                |                |        |
| 575.9984832                                                       | 639.2354238                                      | 663.3694258 | 412.9967766 |                |                |        |
| 626.2011109                                                       | -0.601295704                                     | 0.001736449 | 0.019366989 |                |                | DNAJC6 |
| 1                                                                 | 65248219                                         | 65415869    | +           | 6954           |                |        |
| protein_coding                                                    | DnaJ heat shock protein family (Hsp40) member C6 |             |             |                |                |        |
| [Source:HGNC Symbol;Acc:HGNC:15469]                               | -                                                | 439         | 460         | 373            |                |        |
| 556                                                               | 560                                              | 769         | 3.091423596 | 3.134365123    |                |        |
| 3.33719045                                                        | 4.442752796                                      | 4.949948732 | 5.141888698 |                |                |        |
| ENSG00000122140                                                   | 904.5292131                                      | 1115.093893 | 940.4557448 |                |                |        |
| 1073.263361                                                       | 1618.635412                                      | 1988.382999 | 986.6929503 |                |                |        |
| 1560.093924                                                       | -0.661158125                                     | 0.001739792 | 0.019392049 |                |                | MRPS2  |
| 9                                                                 | 135499984                                        | 135504673   | +           | 2464           |                |        |
| protein_coding                                                    | mitochondrial ribosomal protein S2 [Source:HGNC  |             |             |                |                |        |
| Symbol;Acc:HGNC:14495]                                            | -                                                | 997         | 1260        | 809            | 1036           | 1418   |
| 2305                                                              | 19.81450094                                      | 24.23016003 | 20.42747392 |                |                |        |
| 23.36313377                                                       | 35.37389542                                      | 43.49719428 |             |                |                |        |
| ENSG00000164054                                                   | 2940.400381                                      | 3344.396684 | 3204.989479 |                |                |        |
| 3866.234423                                                       | 4285.160323                                      | 4433.964693 | 3163.262181 |                |                |        |
| 4195.119813                                                       | -0.407396726                                     | 0.001741429 | 0.019398074 |                |                | SHISA5 |
| 3                                                                 | 48467798                                         | 48504826    | -           | 4664           |                |        |
| protein_coding                                                    | shisa family member 5 [Source:HGNC               |             |             |                |                |        |
| Symbol;Acc:HGNC:30376]                                            | -                                                | 3241        | 3779        | 2757           | 3732           | 3754   |
| 5140                                                              | 34.02899891                                      | 38.39235838 | 36.77774277 |                |                |        |
| 44.46262887                                                       | 49.47469058                                      | 51.24312365 |             |                |                |        |
| ENSG00000085563                                                   | 1.814501932                                      | 0           | 1.16249165  | 41.4387398     |                |        |
| 13.69790194                                                       | 9.489029498                                      | 0.992331194 | 21.54189041 |                |                |        |
| -4.455558339                                                      | 0.001749244                                      | 0.019472863 | ABCB1       | 7              |                |        |
| 87503633                                                          | 87713323                                         | -           | 5806        | protein_coding |                |        |
| ATP binding cassette subfamily B member 1 [Source:HGNC            |                                                  |             |             |                |                |        |
| Symbol;Acc:HGNC:40]                                               | -                                                | 2           | 0           | 1              | 40             | 12     |
| 11                                                                | 0.016868701                                      | 0           | 0.010715929 | 0.382820339    |                |        |
| 0.127043244                                                       | 0.088094069                                      |             |             |                |                |        |
| ENSG00000183684                                                   | 2701.793377                                      | 3044.383327 | 3223.589345 |                |                |        |
| 1925.865432                                                       | 2117.467341                                      | 2458.521279 | 2989.922016 |                |                |        |
| 2167.284684                                                       | 0.463660281                                      | 0.001758694 | 0.019554257 |                |                | ALYREF |
| 17                                                                | 81887844                                         | 81891586    | -           | 1574           |                |        |
| protein_coding                                                    | Aly/REF export factor [Source:HGNC               |             |             |                |                |        |
| Symbol;Acc:HGNC:19071]                                            | -                                                | 2978        | 3440        | 2773           | 1859           | 1855   |
| 2850                                                              | 92.65068807                                      | 103.5571657 | 109.6104569 |                |                |        |
| 65.62762765                                                       | 72.44135183                                      | 84.19206275 |             |                |                |        |
| ENSG00000078808                                                   | 4017.307277                                      | 4819.683604 | 5411.39863  |                |                |        |
| 3349.286144                                                       | 3643.641916                                      | 3460.045211 | 4749.46317  |                |                |        |
| 3484.324423                                                       | 0.446698538                                      | 0.001758767 | 0.019554257 |                |                | SDF4   |
| 1                                                                 | 1216908                                          | 1232031     | -           | 4709           | protein_coding |        |
| stromal cell derived factor 4 [Source:HGNC Symbol;Acc:HGNC:24188] |                                                  |             |             |                |                |        |
| -                                                                 | 4428                                             | 5446        | 4655        | 3233           | 3192           | 4011   |
| 46.04766421                                                       | 54.79934751                                      | 61.50321825 | 38.14951823 |                |                |        |

|                         |                                                        |             |             |        |  |  |
|-------------------------|--------------------------------------------------------|-------------|-------------|--------|--|--|
| 41.66597534             | 39.60545342                                            |             |             |        |  |  |
| ENSG00000139998         | 975.2947884                                            | 848.7103518 | 674.2451569 |        |  |  |
| 561.4949242             | 593.5757507                                            | 417.5172979 | 832.7500991 |        |  |  |
| 524.1959909             | 0.669994556                                            | 0.001763697 | 0.019596759 | RAB15  |  |  |
| 14                      | 64945814                                               | 64973226    | - 5015      |        |  |  |
| protein_coding          | "RAB15, member RAS oncogene family [Source:HGNC        |             |             |        |  |  |
| Symbol;Acc:HGNC:20150]" | -                                                      | 1075 959    | 580 542     | 520    |  |  |
| 484                     | 10.49702449                                            | 9.06095786  | 7.195548467 |        |  |  |
| 6.005378611             | 6.373526069                                            | 4.487510135 |             |        |  |  |
| ENSG00000136932         | 164.2124248                                            | 155.7591469 | 160.4238477 |        |  |  |
| 283.8553676             | 335.5985975                                            | 245.8521279 | 160.1318065 |        |  |  |
| 288.4353643             | -0.847662594                                           | 0.001772773 | 0.019685233 | TRM0   |  |  |
| 9                       | 97904489                                               | 97922570    | - 4203      |        |  |  |
| protein_coding          | tRNA methyltransferase 0 [Source:HGNC                  |             |             |        |  |  |
| Symbol;Acc:HGNC:30967]" | -                                                      | 181 176     | 138 274     | 294    |  |  |
| 285                     | 2.108860578                                            | 1.984173836 | 2.042803264 |        |  |  |
| 3.622456813             | 4.299671741                                            | 3.152945676 |             |        |  |  |
| ENSG00000113312         | 1371.763461                                            | 1360.23755  | 1263.628423 |        |  |  |
| 1688.628647             | 1795.566646                                            | 2003.910502 | 1331.876478 |        |  |  |
| 1829.368598             | -0.457889679                                           | 0.001777279 | 0.019722699 | TTC1   |  |  |
| 5                       | 160009113                                              | 160065543   | + 1938      |        |  |  |
| protein_coding          | tetratricopeptide repeat domain 1 [Source:HGNC         |             |             |        |  |  |
| Symbol;Acc:HGNC:12391]" | -                                                      | 1512 1537   | 1087 1630   | 1573   |  |  |
| 2323                    | 38.20557163                                            | 37.57911392 | 34.89656003 |        |  |  |
| 46.73539045             | 49.89101163                                            | 55.73480105 |             |        |  |  |
| ENSG00000143458         | 242.2360079                                            | 287.6234248 | 170.8862725 |        |  |  |
| 342.9055718             | 391.5316971                                            | 554.6769061 | 233.5819017 |        |  |  |
| 429.704725              | -0.878015408                                           | 0.001778377 | 0.019722699 | GABPB2 |  |  |
| 1                       | 151070578                                              | 151125542   | + 9189      |        |  |  |
| protein_coding          | GA binding protein transcription factor subunit beta 2 |             |             |        |  |  |
| [Source:HGNC            | Symbol;Acc:HGNC:28441]"                                | -           | 267 325     | 147    |  |  |
| 331                     | 343 643                                                | 1.4228912   | 1.675874722 |        |  |  |
| 0.995304413             | 2.001574622                                            | 2.294421633 | 3.253671772 |        |  |  |
| ENSG00000186815         | 1344.545932                                            | 1101.818966 | 906.7434869 |        |  |  |
| 736.5735999             | 773.9314595                                            | 734.1058275 | 1117.702795 |        |  |  |
| 748.203629              | 0.580042496                                            | 0.001789113 | 0.019829338 | TPCN1  |  |  |
| 12                      | 113221050                                              | 113298585   | + 8728      |        |  |  |
| protein_coding          | two pore segment channel 1 [Source:HGNC                |             |             |        |  |  |
| Symbol;Acc:HGNC:18182]" | -                                                      | 1482 1245   | 780 711     | 678    |  |  |
| 851                     | 8.31499801                                             | 6.75897834  | 5.560152608 |        |  |  |
| 4.526545673             | 4.774878405                                            | 4.533627569 |             |        |  |  |
| ENSG00000171940         | 1669.341777                                            | 1305.367851 | 2113.40982  |        |  |  |
| 1199.651517             | 1216.830289                                            | 873.8533529 | 1696.039816 |        |  |  |
| 1096.778386             | 0.628934867                                            | 0.001791602 | 0.019844218 | ZNF217 |  |  |
| 20                      | 53567065                                               | 53609907    | - 6181      |        |  |  |
| protein_coding          | zinc finger protein 217 [Source:HGNC                   |             |             |        |  |  |
| Symbol;Acc:HGNC:13009]" | zf-C2H2                                                | 1840 1475   | 1818 1158   | 1066   |  |  |
| 1013                    | 14.57765819                                            | 11.3073209  | 18.29961622 |        |  |  |
| 10.41026679             | 10.60097527                                            | 7.620469337 |             |        |  |  |
| ENSG00000130803         | 889.1059467                                            | 961.9897314 | 882.3311623 |        |  |  |

|                        |                                  |                        |                        |        |
|------------------------|----------------------------------|------------------------|------------------------|--------|
| 1276.313186            | 1278.470848                      | 1241.337586            | 911.1422801            |        |
| 1265.373873            | -0.473420888                     | 0.001792699            | 0.019844218            | ZNF317 |
| 19                     | 9140380 9163424                  | + 5065                 | protein_coding         | zinc   |
| finger protein 317     | [Source:HGNC                     | Symbol;Acc:HGNC:13507] | zf-C2H2                | 980    |
| 1087                   | 759 1232                         | 1120 1439              | 9.474914716            |        |
| 10.16895991            | 9.323289564                      | 13.51584809            | 13.59208035            |        |
| 13.21029033            |                                  |                        |                        |        |
| ENSG00000073008        | 2284.457932                      | 2683.305304            | 2293.596025            |        |
| 3162.811815            | 3135.678052                      | 3444.517708            | 2420.453087            |        |
| 3247.669192            | -0.424051279                     | 0.001803176            | 0.019947706            | PVR    |
| 19                     | 44643798                         | 44663583               | + 3519                 |        |
| protein_coding         | poliovirus receptor              | [Source:HGNC           | Symbol;Acc:HGNC:9705]  |        |
| -                      | 2518 3032                        | 1973 3053              | 2747 3993              |        |
| 35.04008431            | 40.82595673                      | 34.88306723            | 48.20805181            |        |
| 47.98292877            | 52.76076227                      |                        |                        |        |
| ENSG00000163171        | 1653.01126                       | 1357.582565            | 1465.901971            |        |
| 1298.068524            | 777.355935                       | 763.4355551            | 1492.165265            |        |
| 946.2866714            | 0.657318038                      | 0.001806034            | 0.019966832            |        |
| CDC42EP3               | 2 37641882                       | 37738468               | -                      | 10406  |
| protein_coding         | CDC42 effector protein 3         | [Source:HGNC           |                        |        |
| Symbol;Acc:HGNC:16943] | -                                | 1822 1534              | 1261 1253              | 681    |
| 885                    | 8.574192598                      | 6.985025226            | 7.539423026            |        |
| 6.690819178            | 4.022635209                      | 3.954489869            |                        |        |
| ENSG00000175832        | 1032.451599                      | 903.5800513            | 1045.079993            |        |
| 657.8399943            | 631.244981                       | 758.2597208            | 993.7038813            |        |
| 682.448232             | 0.540877153                      | 0.001807896            | 0.019974936            | ETV4   |
| 17                     | 43527844                         | 43579620               | - 3607                 |        |
| protein_coding         | ETS variant 4                    | [Source:HGNC           | Symbol;Acc:HGNC:3493]  |        |
| ETS                    | 1138 1021                        | 899 635                | 553 879                |        |
| 15.44986907            | 13.41238591                      | 15.5067361             | 9.782269573            |        |
| 9.423806263            | 11.33114379                      |                        |                        |        |
| ENSG00000175104        | 249.4940156                      | 246.0286526            | 281.3229793            |        |
| 390.5601226            | 448.6062885                      | 421.8304931            | 258.9485492            |        |
| 420.3323014            | -0.699813114                     | 0.001816526            | 0.020057757            | TRAF6  |
| 11                     | 36487027                         | 36510272               | - 4871                 |        |
| protein_coding         | TNF receptor associated factor 6 | [Source:HGNC           |                        |        |
| Symbol;Acc:HGNC:12036] | -                                | 275 278                | 242 377                | 393    |
| 489                    | 2.764669668                      | 2.704289035            | 3.091036141            |        |
| 4.300661532            | 4.959315991                      | 4.667902193            |                        |        |
| ENSG00000173068        | 544.3505796                      | 427.452659             | 554.508517             |        |
| 286.9632731            | 377.8337951                      | 207.0333709            | 508.7705852            |        |
| 290.6101464            | 0.810148664                      | 0.001818372            | 0.020065619            | BNC2   |
| 9                      | 16409503                         | 16870843               | - 15323                |        |
| protein_coding         | basonuclin 2                     | [Source:HGNC           | Symbol;Acc:HGNC:30988] |        |
| zf-C2H2                | 600 483                          | 477 277                | 331 240                |        |
| 1.917503354            | 1.493584404                      | 1.93678505             | 1.004495536            |        |
| 1.3277966              | 0.728280125                      |                        |                        |        |
| ENSG00000177971        | 563.4028499                      | 747.8209044            | 776.5444221            |        |
| 803.911552             | 1328.696488                      | 1199.930912            | 695.9227255            |        |
| 1110.846317            | -0.675138493                     | 0.001820898            | 0.020080962            | IMP3   |



|                          |                                                                                  |             |             |             |                |
|--------------------------|----------------------------------------------------------------------------------|-------------|-------------|-------------|----------------|
| 15                       | 75639085                                                                         | 75648706    | -           | 2565        |                |
| protein_coding           | "IMP3, U3 small nucleolar ribonucleoprotein [Source:HGNC Symbol;Acc:HGNC:14497]" |             |             |             |                |
|                          | 776                                                                              | 1164        | 1391        | 11.85585596 | 15.60974399    |
| 16.20301894              | 16.81072313                                                                      | 27.89413966 | 25.21568547 |             |                |
| ENSG00000129250          | 4002.791262                                                                      | 3465.64102  | 3209.639445 |             |                |
| 2702.841803              | 2604.884352                                                                      | 2647.43923  | 3559.357242 |             |                |
| 2651.721795              | 0.424913453                                                                      | 0.001824326 | 0.020106232 |             | KIF1C          |
| 17                       | 4997948                                                                          | 5028401     | +           | 8580        | protein_coding |
| kinesin family member 1C | [Source:HGNC Symbol;Acc:HGNC:6317]                                               |             |             |             | -              |
| 4412                     | 3916                                                                             | 2761        | 2609        | 2282        | 3069           |
| 21.62628072              | 20.02100921                                                                      | 16.89658101 | 16.34841721 |             |                |
| 16.63185227              |                                                                                  |             |             |             |                |
| ENSG0000011007           | 2732.63991                                                                       | 2551.441026 | 2555.156646 |             |                |
| 3554.407906              | 3293.203924                                                                      | 3439.341874 | 2613.079194 |             |                |
| 3428.984568              | -0.392006309                                                                     | 0.001826668 | 0.020110367 |             | ELOA           |
| 1                        | 23743155                                                                         | 23762059    | +           | 5391        |                |
| protein_coding           | elongin A [Source:HGNC Symbol;Acc:HGNC:11620]                                    |             |             |             | -              |
| 3012                     | 2883                                                                             | 2198        | 3431        | 2885        | 3987           |
| 25.33971648              | 25.36677185                                                                      | 35.36416676 | 32.89454214 |             |                |
| 34.38807949              |                                                                                  |             |             |             |                |
| ENSG00000151012          | 586.084124                                                                       | 827.4704682 | 691.6825317 |             |                |
| 912.688244               | 1438.279703                                                                      | 991.172263  | 701.745708  |             |                |
| 1114.046737              | -0.665972914                                                                     | 0.001826975 | 0.020110367 |             |                |
| SLC7A11 4                | 138164097                                                                        | 138242349   | -           | 9645        |                |
| protein_coding           | solute carrier family 7 member 11 [Source:HGNC Symbol;Acc:HGNC:11059]            |             |             |             |                |
|                          |                                                                                  | 646         | 935         | 595         | 881            |
| 1149                     | 3.279887665                                                                      | 4.593416433 | 3.83814679  |             | 1260           |
| 5.075580499              | 8.030002368                                                                      | 5.539222558 |             |             |                |
| ENSG00000105556          | 570.6608576                                                                      | 710.651108  | 778.8694054 |             |                |
| 951.0190783              | 1107.247073                                                                      | 998.9360144 | 686.7271237 |             |                |
| 1019.067389              | -0.570150868                                                                     | 0.001836379 | 0.020201309 |             | MIER2          |
| 19                       | 301444                                                                           | 344815      | -           | 7939        | protein_coding |
| family member 2          | [Source:HGNC Symbol;Acc:HGNC:29210]                                              |             |             |             | -              |
| 803                      | 670                                                                              | 918         | 970         | 1158        | 3.879837417    |
| 4.792655185              | 5.25068358                                                                       | 6.425233617 | 7.510230953 |             |                |
| 6.782249709              |                                                                                  |             |             |             |                |
| ENSG00000164087          | 730.3370276                                                                      | 802.6906039 | 814.9066466 |             |                |
| 629.8688449              | 359.5699259                                                                      | 460.6492502 | 782.6447594 |             |                |
| 483.3626737              | 0.69456985                                                                       | 0.001846003 | 0.020294562 |             | POC1A          |
| 3                        | 52075253                                                                         | 52154690    | -           | 2247        |                |
| protein_coding           | POC1 centriolar protein A [Source:HGNC Symbol;Acc:HGNC:24488]                    |             |             |             |                |
|                          |                                                                                  | 805         | 907         | 701         | 608            |
| 534                      | 17.54371209                                                                      | 19.12628643 | 19.4098327  |             | 315            |
| 15.03531566              | 8.616975171                                                                      | 11.05017619 |             |             |                |
| ENSG00000159399          | 693.139738                                                                       | 621.2665975 | 1050.892452 |             |                |
| 590.5020421              | 392.6731889                                                                      | 407.1656294 | 788.432929  |             |                |
| 463.4469535              | 0.765438406                                                                      | 0.001854398 | 0.02037419  |             | HK2            |
| 2                        | 74833981                                                                         | 74893359    | +           | 6064        |                |
| protein_coding           | hexokinase 2 [Source:HGNC Symbol;Acc:HGNC:4923]                                  |             |             |             | -              |

|                         |                                                        |     |             |             |             |                        |             |                    |
|-------------------------|--------------------------------------------------------|-----|-------------|-------------|-------------|------------------------|-------------|--------------------|
|                         | 764                                                    | 702 | 904         | 570         | 344         | 472                    | 6.169682987 |                    |
|                         | 5.485350212                                            |     | 9.275046262 |             | 5.223092374 |                        | 3.486957147 |                    |
|                         | 3.619210341                                            |     |             |             |             |                        |             |                    |
| ENSG00000131381         | 1118.640441                                            |     |             | 1162.883631 |             | 1022.992652            |             |                    |
| 1478.327042             | 1507.910705                                            |     |             | 1557.063477 |             | 1101.505575            |             |                    |
| 1514.433741             | -0.458876416                                           |     |             | 0.001859774 |             | 0.020418662            |             | RBSN               |
| 3                       | 15070073                                               |     |             | 15099163    |             | -                      | 7921        |                    |
| protein_coding          | "rabenosyn, RAB effector [Source:HGNC                  |     |             |             |             |                        |             |                    |
| Symbol;Acc:HGNC:20759]" | -                                                      |     |             | 1233        | 1314        | 880                    | 1427        | 1321               |
| 1805                    | 7.622751232                                            |     |             | 7.860348341 |             | 6.912091928            |             |                    |
| 10.01050538             | 10.25109279                                            |     |             | 10.59566481 |             |                        |             |                    |
| ENSG00000138735         | 151.5109113                                            |     |             | 138.944239  |             | 165.0738143            |             |                    |
| 64.23004668             | 71.91398517                                            |     |             | 74.18695789 |             | 151.8429882            |             |                    |
| 70.11032992             | 1.11347745                                             |     |             | 0.001860754 |             | 0.020418662            |             | PDE5A              |
| 4                       | 119494395                                              |     |             | 119628991   |             | -                      | 9775        |                    |
| protein_coding          | phosphodiesterase 5A [Source:HGNC                      |     |             |             |             |                        |             |                    |
| Symbol;Acc:HGNC:8784]"  | -                                                      |     |             | 167         | 157         | 142                    | 62          | 63                 |
| 86                      | 0.836620282                                            |     |             | 0.76104323  |             | 0.90381267             |             |                    |
| 0.35244144              | 0.396160475                                            |     |             | 0.409084197 |             |                        |             |                    |
| ENSG00000172943         | 1203.014781                                            |     |             | 1163.768626 |             | 956.7306279            |             |                    |
| 1557.060648             | 1572.975739                                            |     |             | 1525.145832 |             | 1107.838012            |             |                    |
| 1551.727406             | -0.485170556                                           |     |             | 0.001865276 |             | 0.020455588            |             | PHF8               |
| X                       | 53936676                                               |     |             | 54048958    |             | -                      | 9015        |                    |
| protein_coding          | PHD finger protein 8 [Source:HGNC                      |     |             |             |             |                        |             |                    |
| Symbol;Acc:HGNC:20672]" | -                                                      |     |             | 1326        | 1315        | 823                    | 1503        | 1378               |
| 1768                    | 7.202884927                                            |     |             | 6.911725195 |             | 5.679903415            |             |                    |
| 9.264143918             | 9.395736891                                            |     |             | 9.119006972 |             |                        |             |                    |
| ENSG00000141076         | 4000.97676                                             |     |             | 4081.597646 |             | 3991.996326            |             |                    |
| 4987.152334             | 5686.912288                                            |     |             | 5064.553835 |             | 4024.856911            |             |                    |
| 5246.206152             | -0.382185518                                           |     |             | 0.00187642  |             | 0.020562221            |             | UTP4               |
| 16                      | 69131291                                               |     |             | 69231130    |             | +                      | 5681        |                    |
| protein_coding          | "UTP4, small subunit processome component [Source:HGNC |     |             |             |             |                        |             |                    |
| Symbol;Acc:HGNC:1983]"  | -                                                      |     |             | 4410        | 4612        | 3434                   | 4814        | 4982               |
| 5871                    | 38.01390489                                            |     |             | 38.46723319 |             | 37.60818272            |             |                    |
| 47.08616719             | 53.90465789                                            |     |             | 48.0527569  |             |                        |             |                    |
| ENSG00000131711         | 3809.546806                                            |     |             | 2616.045673 |             | 3510.724783            |             |                    |
| 2580.597521             | 2317.228411                                            |     |             | 2028.064395 |             | 3312.105754            |             |                    |
| 2308.630109             | 0.520788474                                            |     |             | 0.001877641 |             | 0.020562221            |             | MAP1B              |
| 5                       | 72107234                                               |     |             | 72209570    |             | +                      | 12630       |                    |
| protein_coding          | microtubule associated protein 1B [Source:HGNC         |     |             |             |             |                        |             |                    |
| Symbol;Acc:HGNC:6836]"  | -                                                      |     |             | 4199        | 2956        | 3020                   | 2491        | 2030               |
| 2351                    | 16.28063004                                            |     |             | 11.08989719 |             | 14.87683133            |             |                    |
| 10.95929004             | 9.879615608                                            |     |             | 8.655263553 |             |                        |             |                    |
| ENSG00000168135         | 17.23776835                                            |     |             | 15.92991276 |             | 4.6499666              |             | 0                  |
| 0                       | 0                                                      |     |             | 12.60588257 |             | 0                      |             |                    |
| 0.001878487             | 0.020562221                                            |     |             | KCNJ4       | 22          | 38426327               |             |                    |
| 38455199                | -                                                      |     |             | 2065        |             | protein_coding         |             | potassium voltage- |
| gated channel           | subfamily J member 4 [Source:HGNC                      |     |             |             |             | Symbol;Acc:HGNC:6265]" |             |                    |
| -                       | 19                                                     | 18  |             | 4           | 0           | 0                      | 0           |                    |
| 0.450569955             | 0.413027425                                            |     |             | 0.120516575 |             | 0                      | 0           | 0                  |

|                                                                    |              |             |             |             |                       |
|--------------------------------------------------------------------|--------------|-------------|-------------|-------------|-----------------------|
| ENSG00000233117                                                    | 461.7907417  | 339.8381388 | 463.8341683 |             |                       |
| 271.4237457                                                        | 182.6386925  | 267.418104  | 421.8210163 |             |                       |
| 240.4935141                                                        | 0.808128114  | 0.001880343 | 0.020569818 |             |                       |
| LINC00702                                                          | 10           | 4201141     | 4243912     | -           | 6785 lincRNA long     |
| intergenic non-protein coding RNA 702 [Source:HGNC                 |              |             |             |             |                       |
| Symbol;Acc:HGNC:44676]                                             | -            | 509         | 384         | 399         | 262 160               |
| 310                                                                | 3.673640158  | 2.681685311 | 3.658726031 |             |                       |
| 2.145672736                                                        | 1.449497567  | 2.124432125 |             |             |                       |
| ENSG00000121210                                                    | 244.9577608  | 211.5138416 | 242.9607548 |             |                       |
| 158.5031797                                                        | 90.17785443  | 47.44514749 | 233.1441191 |             |                       |
| 98.70872721                                                        | 1.243123998  | 0.001886446 | 0.020623816 |             |                       |
| TMEM131L                                                           | 4            | 153466346   | 153636711   | +           | 6393                  |
| protein_coding transmembrane 131 like [Source:HGNC                 |              |             |             |             |                       |
| Symbol;Acc:HGNC:29146]                                             | -            | 270         | 239         | 209         | 153 79                |
| 55                                                                 | 2.068177187  | 1.771412224 | 2.033988196 |             |                       |
| 1.329838096                                                        | 0.759573399  | 0.400026722 |             |             |                       |
| ENSG00000169554                                                    | 2399.678805  | 2160.273169 | 2469.132264 |             |                       |
| 1881.318787                                                        | 1668.861053  | 1631.250435 | 2343.028079 |             |                       |
| 1727.143425                                                        | 0.439883067  | 0.001890143 | 0.020651478 |             | ZEB2                  |
| 2                                                                  | 144364364    | 144524583   | -           | 25058       |                       |
| protein_coding zinc finger E-box binding homeobox 2 [Source:HGNC   |              |             |             |             |                       |
| Symbol;Acc:HGNC:14881]                                             | zf-C2H2      | 2645        | 2441        | 2124        | 1816 1462             |
| 1891                                                               | 5.169016935  | 4.615808848 | 5.273694332 |             |                       |
| 4.02699864                                                         | 3.586314135  | 3.508941615 |             |             |                       |
| ENSG00000198053                                                    | 296.6710659  | 292.0484005 | 624.258016  |             |                       |
| 193.7261085                                                        | 171.2237742  | 240.6762936 | 404.3258275 |             |                       |
| 201.8753921                                                        | 0.99814096   | 0.001893067 | 0.02067066  |             | SIRPA                 |
| 20                                                                 | 1894167      | 1940592     | +           | 5068        | protein_coding signal |
| regulatory protein alpha [Source:HGNC Symbol;Acc:HGNC:9662]        |              |             |             |             |                       |
| 327                                                                | 330          | 537         | 187         | 150         | 279 3.159656201       |
| 3.085345292                                                        | 6.592414806  | 2.050298264 | 1.819290338 |             |                       |
| 2.559756268                                                        |              |             |             |             |                       |
| ENSG00000273270                                                    | 134.273143   | 145.1392051 | 160.4238477 |             |                       |
| 217.5533839                                                        | 285.372957   | 309.6874173 | 146.6120653 |             |                       |
| 270.8712527                                                        | -0.887510067 | 0.001905908 | 0.020798034 |             |                       |
| AC090114.2                                                         | 7            | 128524016   | 128531069   | -           | 7054                  |
| lincRNA novel transcript                                           |              |             |             |             |                       |
| 210                                                                | 250          | 359         | 1.02743639  | 1.101627664 | 138                   |
| 1.217167865                                                        | 1.654229963  | 2.178471655 | 2.366410106 |             |                       |
| ENSG00000131165                                                    | 4382.022166  | 5707.333742 | 4966.164328 |             |                       |
| 5498.920771                                                        | 7626.306904  | 8495.269318 | 5018.506745 |             |                       |
| 7206.832331                                                        | -0.522161833 | 0.001931808 | 0.021061089 |             | CHMP1A                |
| 16                                                                 | 89644431     | 89657845    | -           | 3208        |                       |
| protein_coding charged multivesicular body protein 1A [Source:HGNC |              |             |             |             |                       |
| Symbol;Acc:HGNC:8740]                                              | -            | 4830        | 6449        | 4272        | 5308 6681             |
| 9848                                                               | 73.72952818  | 95.25427111 | 82.85214013 |             |                       |
| 91.94086772                                                        | 128.013117   | 142.7396733 |             |             |                       |
| ENSG00000066557                                                    | 1091.422912  | 808.0005748 | 1007.88026  |             |                       |
| 747.9692533                                                        | 606.1321608  | 552.088989  | 969.1012491 |             |                       |
| 635.396801                                                         | 0.609225468  | 0.001932396 | 0.021061089 |             | LRRC40                |

|                                  |                                              |                         |              |      |        |
|----------------------------------|----------------------------------------------|-------------------------|--------------|------|--------|
| 1                                | 70144805                                     | 70205620                | -            | 2884 |        |
| protein_coding                   | leucine rich repeat containing               | 40                      | [Source:HGNC |      |        |
| Symbol;Acc:HGNC:26004]           | -                                            | 1203 913                | 867          | 722  | 531    |
| 640                              | 20.42673971                                  | 15.00036968             | 18.7038361   |      |        |
| 13.91086017                      | 11.31739894                                  | 10.31848022             |              |      |        |
| ENSG00000187801                  | 54.43505796                                  | 39.82478189             | 30.2247829   |      |        |
| 154.3593057                      | 115.2906746                                  | 75.91223598             | 41.49487425  |      |        |
| 115.1874055                      | -1.466750581                                 | 0.001934746             | 0.02107372   |      | ZFP69B |
| 1                                | 40450102                                     | 40463718                | +            | 2386 |        |
| protein_coding                   | ZFP69 zinc finger protein B                  | [Source:HGNC            |              |      |        |
| Symbol;Acc:HGNC:28053]           | zf-C2H2                                      | 60 45                   | 26           | 149  | 101    |
| 88                               | 1.231429334                                  | 0.893652172             | 0.677968873  |      |        |
| 3.4699872                        | 2.601946093                                  | 1.714917574             |              |      |        |
| ENSG00000175213                  | 356.5496296                                  | 505.3322324             | 454.5342351  |      |        |
| 591.5380106                      | 712.2909008                                  | 778.1004188             | 438.8053657  |      |        |
| 693.9764434                      | -0.661884449                                 | 0.001936288             | 0.021077539  |      | ZNF408 |
| 11                               | 46700818                                     | 46705912                | +            | 3078 |        |
| protein_coding                   | zinc finger protein 408                      | [Source:HGNC            |              |      |        |
| Symbol;Acc:HGNC:20041]           | zf-C2H2                                      | 393 571                 | 391          | 571  | 624    |
| 902                              | 6.252484423                                  | 8.790102383             | 7.903418669  |      |        |
| 10.30812168                      | 12.46129951                                  | 13.62601743             |              |      |        |
| ENSG00000166881                  | 1682.950542                                  | 1254.038132             | 1449.627087  |      |        |
| 1249.378005                      | 803.610247                                   | 723.754159              | 1462.205254  |      |        |
| 925.5808036                      | 0.660085601                                  | 0.001942934             | 0.02113688   |      | NEMP1  |
| 12                               | 57055643                                     | 57088063                | -            | 5708 |        |
| protein_coding                   | nuclear envelope integral membrane protein 1 | [Source:HGNC            |              |      |        |
| Symbol;Acc:HGNC:29001]           | -                                            | 1855                    | 1417         |      | 1247   |
| 1206                             | 704 839                                      | 15.91434003             | 11.76284371  |      |        |
| 13.59218684                      | 11.74019707                                  | 7.58116685              | 6.834535671  |      |        |
| ENSG00000203434                  | 5.443505796                                  | 4.424975766             | 1.16249165   |      |        |
| 22.79130689                      | 53.65011592                                  | 18.978059               | 3.67699107   |      |        |
| 31.80649394                      | -3.082461993                                 | 0.001950643             | 0.021207701  |      |        |
| AL353740.1                       | 10 108547975                                 | 108561815               | -            |      | 575    |
| lincRNA                          | novel transcript                             | -                       | 6            | 5    | 1      |
| 22                               | 47 22                                        | 0.510989633             | 0.412029774  |      |        |
| 0.108202925                      | 2.126017719                                  | 5.024320943             | 1.779040579  |      |        |
| ENSG00000271216                  | 182.3574442                                  | 166.3790888             | 86.02438209  |      |        |
| 229.9850059                      | 337.8815811                                  | 320.9017248             | 144.920305   |      |        |
| 296.256104                       | -1.027247208                                 | 0.001953316             | 0.021223714  |      |        |
| LINC01050                        | 13 42810366                                  | 42812562                | -            |      | 760    |
| lincRNA                          | long intergenic non-protein coding RNA 1050  | [Source:HGNC            |              |      |        |
| Symbol;Acc:HGNC:49044]           | -                                            | 201                     | 188          |      | 74     |
| 222                              | 296 372                                      | 12.95123396             | 11.72116279  |      |        |
| 6.05794009                       | 16.23122977                                  | 23.94007348             | 22.75937679  |      |        |
| ENSG00000154898                  | 32.66103478                                  | 23.00987398             | 17.43737475  |      |        |
| 4.14387398                       | 0 0                                          | 24.36942783             | 1.381291327  |      |        |
| 4.160611959                      | 0.001964231                                  | 0.021329213             | CCDC144CP    |      | 17     |
| 20321164                         | 20403557                                     | +                       | 8145         |      |        |
| transcribed_processed_pseudogene | "coiled-coil domain containing               |                         |              |      |        |
| 144C, pseudogene                 | [Source:HGNC                                 | Symbol;Acc:HGNC:29073]" | -            |      | 36     |

|                        |                                                        |      |             |             |             |              |
|------------------------|--------------------------------------------------------|------|-------------|-------------|-------------|--------------|
| 26                     | 15                                                     | 4    | 0           | 0           | 0.216441281 |              |
| 0.151254638            | 0.114579525                                            |      | 0.027288581 | 0           | 0           |              |
| ENSG00000130724        | 1680.228789                                            |      | 2132.838319 | 1984.373246 |             |              |
| 2157.922375            | 2974.727704                                            |      | 3341.001022 | 1932.480118 |             |              |
| 2824.550367            | -0.547815408                                           |      | 0.0019661   | 0.02133641  |             | CHMP2A       |
| 19                     | 58551566                                               |      | 58555124    | -           | 2129        |              |
| protein_coding         | charged multivesicular body protein 2A                 |      |             |             |             | [Source:HGNC |
| Symbol;Acc:HGNC:30216] | -                                                      |      | 1852        | 2410        | 1707        | 2083         |
| 3873                   | 42.59847035                                            |      | 53.63741286 | 49.88439464 |             | 2606         |
| 54.36578361            | 75.23953627                                            |      | 84.58685029 |             |             |              |
| ENSG00000123472        | 1605.83421                                             |      | 1691.225738 | 1529.839011 |             |              |
| 1128.169691            | 1208.839846                                            |      | 1203.381468 | 1608.96632  |             |              |
| 1180.130335            | 0.447436781                                            |      | 0.001967643 | 0.021340056 |             | ATPAF1       |
| 1                      | 46632737                                               |      | 46673867    | -           | 5677        |              |
| protein_coding         | ATP synthase mitochondrial F1 complex assembly factor  |      |             |             |             |              |
| 1 [Source:HGNC         | Symbol;Acc:HGNC:18803]                                 |      | -           | 1770        | 1911        | 1316         |
| 1089                   | 1059                                                   | 1395 | 15.2680318  | 15.95027715 |             |              |
| 14.42260939            | 10.65911209                                            |      | 11.46632972 | 11.42579247 |             |              |
| ENSG00000101474        | 2366.110519                                            |      | 2569.14093  | 2714.418002 |             |              |
| 1841.951984            | 1525.033082                                            |      | 2099.663436 | 2549.889817 |             |              |
| 1822.216168            | 0.483915891                                            |      | 0.001969243 | 0.021344329 |             | APMAP        |
| 20                     | 24962925                                               |      | 24992979    | -           | 2454        |              |
| protein_coding         | adipocyte plasma membrane associated protein           |      |             |             |             |              |
| [Source:HGNC           | Symbol;Acc:HGNC:13238]                                 |      | -           | 2608        | 2903        | 2335         |
| 1778                   | 1336                                                   | 2434 | 52.04292677 | 56.05300735 |             |              |
| 59.19965464            | 40.25958019                                            |      | 33.46410852 | 46.11869753 |             |              |
| ENSG00000120539        | 725.8007728                                            |      | 549.5819901 | 582.4083166 |             |              |
| 456.8621063            | 355.0039586                                            |      | 357.1325647 | 619.2636932 |             |              |
| 389.6662099            | 0.668801936                                            |      | 0.001975086 | 0.021394542 |             | MASTL        |
| 10                     | 27154824                                               |      | 27186924    | +           | 3631        |              |
| protein_coding         | microtubule associated serine/threonine kinase like    |      |             |             |             |              |
| [Source:HGNC           | Symbol;Acc:HGNC:19042]                                 |      | -           | 800         | 621         | 501          |
| 441                    | 311                                                    | 414  | 10.78927895 | 8.103857433 |             |              |
| 8.584565597            | 6.748766219                                            |      | 5.264795424 | 5.30157745  |             |              |
| ENSG00000116489        | 8376.648169                                            |      | 6612.683784 | 7291.147628 |             |              |
| 6143.293175            | 5310.219985                                            |      | 5090.433006 | 7426.826527 |             |              |
| 5514.648722            | 0.42954629                                             |      | 0.001980691 | 0.021438056 |             | CAPZA1       |
| 1                      | 112619173                                              |      | 112671619   | +           | 4130        |              |
| protein_coding         | capping actin protein of muscle Z-line subunit alpha 1 |      |             |             |             |              |
| [Source:HGNC           | Symbol;Acc:HGNC:1488]                                  |      | -           | 9233        | 7472        | 6272         |
| 5930                   | 4652                                                   | 5901 | 109.4766419 | 85.72613669 |             |              |
| 94.48499504            | 79.78416154                                            |      | 69.23680434 | 66.43647494 |             |              |
| ENSG00000135775        | 775.6995759                                            |      | 806.2305845 | 723.0698062 |             |              |
| 1233.838477            | 1061.5874                                              |      | 1008.425044 | 768.3333222 |             |              |
| 1101.283641            | -0.518653358                                           |      | 0.00198167  | 0.021438056 |             | COG2         |
| 1                      | 230642489                                              |      | 230693982   | +           | 10938       |              |
| protein_coding         | component of oligomeric golgi complex 2                |      |             |             |             |              |
| [Source:HGNC           | Symbol;Acc:HGNC:6546]                                  |      | -           | 855         | 911         | 622          |
| 1169                   | 3.827867348                                            |      | 3.946452671 | 3.538012087 |             |              |
| 6.050425059            | 5.226276585                                            |      | 4.969441818 |             |             |              |

|                                         |                                           |                   |                |        |
|-----------------------------------------|-------------------------------------------|-------------------|----------------|--------|
| ENSG00000138398                         | 1786.377152                               | 1376.167463       | 1408.93988     |        |
| 1195.507643                             | 979.3999886                               | 990.309624        | 1523.828165    |        |
| 1055.072419                             | 0.530680773                               | 0.001982738       | 0.021438056    | PPIG   |
| 2                                       | 169584340                                 | 169641406         | + 7368         |        |
| protein_coding                          | peptidylprolyl isomerase G [Source:HGNC   |                   |                |        |
| Symbol;Acc:HGNC:14650]                  | -                                         | 1969 1555         | 1212 1154      | 858    |
| 1148                                    | 13.08653836                               | 10.00016618       | 10.2343402     |        |
| 8.702985006                             | 7.157890179                               | 7.244748089       |                |        |
| ENSG00000108828                         | 5491.590097                               | 5730.343616       | 7062.136773    |        |
| 8216.266133                             | 8908.202227                               | 7523.937753       | 6094.690162    |        |
| 8216.135371                             | -0.431043996                              | 0.001994706       | 0.021551771    | VAT1   |
| 17                                      | 43014605                                  | 43025123          | - 3501         |        |
| protein_coding                          | vesicle amine transport 1 [Source:HGNC    |                   |                |        |
| Symbol;Acc:HGNC:16919]                  | -                                         | 6053 6475         | 6075 7931      | 7804   |
| 8722                                    | 84.66564996                               | 87.63429613       | 107.9595382    |        |
| 125.8774344                             | 137.0163866                               | 115.8390507       |                |        |
| ENSG00000156603                         | 604.2291433                               | 879.6851822       | 909.0684702    |        |
| 1017.321062                             | 1220.254764                               | 1488.914992       | 797.6609319    |        |
| 1242.163606                             | -0.640110313                              | 0.001995692       | 0.021551771    | MED19  |
| 11                                      | 57703714                                  | 57712323          | - 1877         |        |
| protein_coding                          | mediator complex subunit 19 [Source:HGNC  |                   |                |        |
| Symbol;Acc:HGNC:29600]                  | -                                         | 666 994           | 782 982        | 1069   |
| 1726                                    | 17.37555318                               | 25.09276692       | 25.92085526    |        |
| 29.07095232                             | 35.00747544                               | 42.75703063       |                |        |
| ENSG00000250786                         | 74.39457921                               | 106.1994184       | 142.9864729    |        |
| 40.4027713                              | 17.12237742                               | 48.30778654       | 107.8601568    |        |
| 35.27764509                             | 1.602460314                               | 0.002003239       | 0.021620066    | SNHG18 |
| 5                                       | 9546200 9550609 +                         | 1951              | lincRNA small  |        |
| nucleolar RNA host gene 18 [Source:HGNC | Symbol;Acc:HGNC:49007]                    | -                 |                |        |
| 82                                      | 120 123                                   | 39 15             | 56 2.058189065 |        |
| 2.91440845                              | 3.922425365                               | 1.110757825       | 0.472586542    |        |
| 1.334632744                             |                                           |                   |                |        |
| ENSG00000133703                         | 1123.176696                               | 860.2152888       | 1069.492318    |        |
| 768.6886232                             | 648.3673584                               | 649.5672011       | 1017.628101    |        |
| 688.8743942                             | 0.56268016                                | 0.002036474       | 0.021952455    | KRAS   |
| 12                                      | 25204789                                  | 25250936          | - 7302         |        |
| protein_coding                          | "KRAS proto-oncogene, GTPase [Source:HGNC |                   |                |        |
| Symbol;Acc:HGNC:6407]"                  | -                                         | 1238 972          | 920 742        | 568    |
| 753                                     | 8.302473529                               | 6.307407311       | 7.838858867    |        |
| 5.646432234                             | 4.781386679                               | 4.794950915       |                |        |
| ENSG00000242808                         | 8.165258694                               | 8.849951531       | 19.76235805    | 0      |
| 0                                       | 0                                         | 12.25918942 0     | 6.045360067    |        |
| 0.002036519                             | 0.021952455                               | SOX2-OT 3         | 180989762      |        |
| 181836880                               | + 31629                                   | sense_overlapping | SOX2           |        |
| overlapping transcript [Source:HGNC     | Symbol;Acc:HGNC:20209]                    | -                 |                |        |
| 9                                       | 10 17                                     | 0 0               | 0 0.013934318  |        |
| 0.014981006                             | 0.033440311                               | 0                 | 0 0            |        |
| ENSG00000075240                         | 368.3438922                               | 396.4778286       | 401.0596192    |        |
| 239.3087223                             | 252.269694                                | 224.2861518       | 388.6271133    |        |
| 238.6215227                             | 0.704269309                               | 0.002050136       | 0.022082428    | GRAMD4 |

|                                     |                                                   |             |                |               |         |
|-------------------------------------|---------------------------------------------------|-------------|----------------|---------------|---------|
| 22                                  | 46576012                                          | 46679790    | +              | 4885          |         |
| protein_coding                      | GRAM domain containing 4 [Source:HGNC             |             |                |               |         |
| Symbol;Acc:HGNC:29113]              | -                                                 | 406         | 448            | 345           | 231 221 |
| 260                                 | 4.069960076                                       | 4.345501326 |                | 4.394013366   |         |
| 2.627601224                         | 2.780834007                                       | 2.474798237 |                |               |         |
| ENSG00000169188                     | 1260.171592                                       | 1683.260781 |                | 1250.841015   |         |
| 1903.074125                         | 1870.905106                                       | 2227.334015 |                | 1398.091129   |         |
| 2000.437749                         | -0.516644062                                      | 0.002051401 |                | 0.022082428   | APEX2   |
| X                                   | 55000357                                          | 55009057    | +              | 3245          |         |
| protein_coding                      | apurinic/apyrimidinic endodeoxyribonuclease 2     |             |                |               |         |
| [Source:HGNC Symbol;Acc:HGNC:17889] | -                                                 |             |                | 1389 1902     | 1076    |
| 1837                                | 1639                                              | 2582        | 20.96120417    | 27.77296535   |         |
| 20.63024648                         | 31.45621748                                       | 31.04642602 |                | 36.997515     |         |
| ENSG00000273291                     | 15.42326642                                       | 7.079961225 |                | 13.9498998    | 0       |
| 0                                   | 0                                                 | 12.15104248 | 0              | 6.035066757   |         |
| 0.002052321                         | 0.022082428                                       | AC092042.3  | 3              | 42809446      |         |
| 43055871                            | +                                                 | 1654        | protein_coding | novel protein |         |
| -                                   | 17                                                | 8           | 12             | 0             | 0       |
| 0.50331758                          | 0.22918222                                        | 0.45139068  | 0              | 0             | 0       |
| ENSG00000263513                     | 144.2529036                                       | 89.38451047 |                | 118.5741483   |         |
| 35.22292883                         | 65.06503421                                       | 21.56597613 |                | 117.4038541   |         |
| 40.61797972                         | 1.540292062                                       | 0.002061159 |                | 0.022164042   | FAM72C  |
| 1                                   | 143955364                                         | 143971965   | -              | 2297          |         |
| protein_coding                      | family with sequence similarity 72 member C       |             |                |               |         |
| [Source:HGNC Symbol;Acc:HGNC:30602] | -                                                 |             |                | 159 101       | 102     |
| 34                                  | 57                                                | 25          | 3.389727703    | 2.083467928   |         |
| 2.762778217                         | 0.822488748                                       | 1.525320899 |                | 0.506069346   |         |
| ENSG00000113732                     | 1030.637097                                       | 1246.073176 |                | 1212.478791   |         |
| 1483.506885                         | 1663.153594                                       | 1717.514339 |                | 1163.063021   |         |
| 1621.391606                         | -0.479649573                                      | 0.002070415 |                | 0.022239191   |         |
| ATP6V0E1                            | 5                                                 | 172983757   | 173035445      | +             | 1623    |
| protein_coding                      | ATPase H+ transporting V0 subunit e1              |             |                |               |         |
| [Source:HGNC Symbol;Acc:HGNC:863]   | -                                                 |             |                | 1136 1408     | 1043    |
| 1432                                | 1457                                              | 1991        | 34.27587064    | 41.10650713   |         |
| 39.98274759                         | 49.02713801                                       | 55.18085078 |                | 57.04055708   |         |
| ENSG00000162711                     | 146.0674055                                       | 118.5893505 |                | 180.1862057   |         |
| 266.2439032                         | 239.7132839                                       | 325.2149201 |                | 148.2809873   |         |
| 277.0573691                         | -0.906115395                                      | 0.002070662 |                | 0.022239191   | NLRP3   |
| 1                                   | 247416156                                         | 247449108   | +              | 4757          |         |
| protein_coding                      | NLR family pyrin domain containing 3 [Source:HGNC |             |                |               |         |
| Symbol;Acc:HGNC:16400]              | -                                                 | 161         | 134            | 155 257       | 210     |
| 377                                 | 1.657377383                                       | 1.33474434  |                | 2.027241058   |         |
| 3.002009177                         | 2.713522978                                       | 3.685014634 |                |               |         |
| ENSG00000181666                     | 341.1263632                                       | 340.723134  |                | 291.7854041   |         |
| 424.7470829                         | 591.292767                                        | 555.5395452 |                | 324.5449671   |         |
| 523.8597984                         | -0.689611092                                      | 0.002072475 |                | 0.0222445     | HKR1    |
| 19                                  | 37312837                                          | 37369365    | +              | 7203          |         |
| protein_coding                      | "HKR1, GLI-Kruppel zinc finger family member      |             |                |               |         |
| [Source:HGNC Symbol;Acc:HGNC:4928]" | zf-C2H2                                           | 376         | 385            |               | 251     |
| 410                                 | 518                                               | 644         | 2.556248754    | 2.532641713   |         |

|                        |                                                   |             |             |         |
|------------------------|---------------------------------------------------|-------------|-------------|---------|
| 2.168039315            | 3.162878329                                       | 4.42042173  | 4.15722443  |         |
| ENSG00000171302        | 2530.322944                                       | 2839.064451 | 2943.428858 |         |
| 3464.278647            | 3699.575015                                       | 3837.881112 | 2770.938751 |         |
| 3667.244925            | -0.404610299                                      | 0.002073672 | 0.0222445   | CANT1   |
| 17                     | 78991717                                          | 79009867    | - 4421      |         |
| protein_coding         | calcium activated nucleotidase 1 [Source:HGNC     |             |             |         |
| Symbol;Acc:HGNC:19721] | -                                                 | 2789 3208   | 2532 3344   | 3241    |
| 4449                   | 30.89275804                                       | 34.38272435 | 35.63280679 |         |
| 42.02984588            | 45.06152407                                       | 46.79214013 |             |         |
| ENSG00000189184        | 289.4130581                                       | 292.0484005 | 323.1726787 |         |
| 164.7189907            | 205.4685291                                       | 107.8298807 | 301.5447124 |         |
| 159.3391335            | 0.923753436                                       | 0.002083097 | 0.022324547 | PCDH18  |
| 4                      | 137518918                                         | 137532494   | - 6686      |         |
| protein_coding         | protocadherin 18 [Source:HGNC                     |             |             |         |
| Symbol;Acc:HGNC:14268] | -                                                 | 319 330     | 278 159     | 180 125 |
| 2.336431186            | 2.338697269                                       | 2.586933532 | 1.321425842 |         |
| 1.65483041             | 0.869309967                                       |             |             |         |
| ENSG00000115524        | 6752.66894                                        | 5313.510899 | 5953.119739 |         |
| 5151.871325            | 4144.756828                                       | 3240.072254 | 6006.433193 |         |
| 4178.900136            | 0.523593967                                       | 0.002083658 | 0.022324547 | SF3B1   |
| 2                      | 197389784                                         | 197435091   | - 9164      |         |
| protein_coding         | splicing factor 3b subunit 1 [Source:HGNC         |             |             |         |
| Symbol;Acc:HGNC:10768] | -                                                 | 7443 6004   | 5121 4973   | 3631    |
| 3756                   | 39.77329964                                       | 31.04431231 | 34.76774646 |         |
| 30.15403415            | 24.35502213                                       | 19.05774542 |             |         |
| ENSG00000134996        | 476.3067571                                       | 433.647625  | 599.8456913 |         |
| 357.4091307            | 224.8738902                                       | 305.374222  | 503.2666912 |         |
| 295.8857476            | 0.764047948                                       | 0.002102043 | 0.022507891 | OSTF1   |
| 9                      | 75088543                                          | 75147265    | + 1319      |         |
| protein_coding         | osteoclast stimulating factor 1 [Source:HGNC      |             |             |         |
| Symbol;Acc:HGNC:8510]  | -                                                 | 525 490     | 516 345     | 197     |
| 354                    | 19.49140706                                       | 17.60263668 | 24.33950562 |         |
| 14.53403973            | 9.180551915                                       | 12.47927872 |             |         |
| ENSG00000133083        | 468.1414984                                       | 393.8228431 | 540.5586172 |         |
| 350.1573513            | 221.4494147                                       | 241.5389327 | 467.5076529 |         |
| 271.0485662            | 0.7854748                                         | 0.002115724 | 0.022640676 | DCLK1   |
| 13                     | 35768652                                          | 36131306    | - 14375     |         |
| protein_coding         | doublecortin like kinase 1 [Source:HGNC           |             |             |         |
| Symbol;Acc:HGNC:2700]  | -                                                 | 516 445     | 465 338     | 194     |
| 280                    | 1.757804338                                       | 1.466825997 | 2.012574409 |         |
| 1.306534526            | 0.829547458                                       | 0.905693386 |             |         |
| ENSG00000112319        | 303.0218226                                       | 334.5281679 | 215.0609552 |         |
| 526.2719954            | 447.4647966                                       | 453.7481378 | 284.2036486 |         |
| 475.82831              | -0.740870359                                      | 0.002120451 | 0.022677542 | EYA4    |
| 6                      | 133240598                                         | 133532120   | + 8968      |         |
| protein_coding         | EYA transcriptional coactivator and phosphatase 4 |             |             |         |
| [Source:HGNC           | Symbol;Acc:HGNC:3522]                             | -           | 334 378     | 185     |
| 508                    | 392 526                                           | 1.823809824 | 1.997204984 |         |
| 1.283461883            | 3.147604491                                       | 2.686815392 | 2.727226214 |         |
| ENSG00000159363        | 1919.743044                                       | 1723.970558 | 2180.834335 |         |



|                        |                            |             |                                     |       |
|------------------------|----------------------------|-------------|-------------------------------------|-------|
| 1207.939265            | 1471.382967                | 1468.211655 | 1941.515979                         |       |
| 1382.511296            | 0.489353346                | 0.002121939 | 0.022679747                         |       |
| ATP13A2 1              | 16985958                   | 17011928    | - 5253                              |       |
| protein_coding         | ATPase cation transporting | 13A2        | [Source:HGNC                        |       |
| Symbol;Acc:HGNC:30213] | -                          | 2116 1948   | 1876 1166                           | 1289  |
| 1702                   | 19.7259054                 | 17.57146584 | 22.21939757                         |       |
| 12.33397868            | 15.08317871                | 15.06548693 |                                     |       |
| ENSG00000124659        | 409.1701857                | 522.1471403 | 489.4089846                         |       |
| 584.2862311            | 818.4496408                | 825.5455663 | 473.5754369                         |       |
| 742.7604794            | -0.649672657               | 0.002127457 | 0.022724997                         | TBCC  |
| 6                      | 42744481                   | 42746096    | - 1616                              |       |
| protein_coding         | tubulin folding cofactor C |             | [Source:HGNC                        |       |
| Symbol;Acc:HGNC:11580] | -                          | 451 590     | 421 564                             | 717   |
| 957                    | 13.66670654                | 17.29964121 | 16.20867768                         |       |
| 19.39321406            | 27.27251312                | 27.53604733 |                                     |       |
| ENSG00000131149        | 2669.132342                | 2370.902015 | 2821.367234                         |       |
| 1965.232235            | 1779.58576                 | 2065.157874 | 2620.467197                         |       |
| 1936.658623            | 0.435636959                | 0.002130031 | 0.022738756                         | GSE1  |
| 16                     | 85169525                   | 85676204    | + 13387                             |       |
| protein_coding         | Gse1 coiled-coil protein   |             | [Source:HGNC                        |       |
| Symbol;Acc:HGNC:28979] | -                          | 2942 2679   | 2427 1897                           | 1559  |
| 2394                   | 10.7618786                 | 9.482348028 | 11.27959119                         |       |
| 7.874012704            | 7.158305218                | 8.315184708 |                                     |       |
| ENSG00000006459        | 75.30183018                | 169.9190694 | 95.32431529                         |       |
| 153.3233372            | 269.3920714                | 364.8963162 | 113.5150716                         |       |
| 262.5372416            | -1.208810634               | 0.002150794 | 0.022946562                         | KDM7A |
| 7                      | 140084746                  | 140177035   | - 9430                              |       |
| protein_coding         | lysine demethylase 7A      |             | [Source:HGNC                        |       |
| Symbol;Acc:HGNC:22224] | -                          | 83 192      | 82 148                              | 236   |
| 423                    | 0.431017678                | 0.964752642 | 0.541014626                         |       |
| 0.872091526            | 1.538323485                | 2.085737708 |                                     |       |
| ENSG00000143494        | 307.5580775                | 197.3539191 | 282.4854709                         |       |
| 169.8988332            | 117.5736583                | 115.5936321 | 262.4658225                         |       |
| 134.3553745            | 0.965981304                | 0.002162781 | 0.023060542                         | VASH2 |
| 1                      | 212950520                  | 212992037   | + 9086                              |       |
| protein_coding         | vasohibin 2                |             | [Source:HGNC Symbol;Acc:HGNC:25723] | -     |
| 339                    | 223 243                    | 164 103     | 134 1.827071946                     |       |
| 1.162943382            | 1.663950443                | 1.002958952 | 0.696805953                         |       |
| 0.685745686            |                            |             |                                     |       |
| ENSG00000139083        | 797.4735991                | 501.7922518 | 628.9079826                         |       |
| 465.1498542            | 327.6081547                | 375.2479847 | 642.7246112                         |       |
| 389.3353312            | 0.722885758                | 0.00216473  | 0.023067416                         | ETV6  |
| 12                     | 11649854                   | 11895402    | + 7075                              |       |
| protein_coding         | ETS variant 6              |             | [Source:HGNC Symbol;Acc:HGNC:3495]  |       |
| ETS                    | 879 567                    | 541 449     | 287 435                             |       |
| 6.084026744            | 3.797371228                | 4.757487628 | 3.526402985                         |       |
| 2.493462337            | 2.858866205                |             |                                     |       |
| ENSG00000173531        | 46.26979926                | 46.90474312 | 51.1496326                          |       |
| 65.26601518            | 158.6673641                | 161.3135015 | 48.10805833                         |       |
| 128.4156269            | -1.418007248               | 0.002166056 | 0.02306765                          | MST1  |

|                                                            |                                                  |             |             |                  |      |                |
|------------------------------------------------------------|--------------------------------------------------|-------------|-------------|------------------|------|----------------|
| 3                                                          | 49683947                                         | 49689501    | -           | 5084             |      |                |
| protein_coding                                             | macrophage stimulating 1 [Source:HGNC            |             |             |                  |      |                |
| Symbol;Acc:HGNC:7380]                                      | -                                                | 51          | 53          | 44               | 63   | 139            |
| 187                                                        | 0.491239542                                      | 0.493965672 | 0.538460663 |                  |      |                |
| 0.688568342                                                | 1.680570046                                      | 1.710279471 |             |                  |      |                |
| ENSG00000135404                                            | 5060.645888                                      | 6153.3713   | 7627.107715 |                  |      |                |
| 4380.074796                                                | 5007.72465                                       | 3920.694461 | 6280.374968 |                  |      |                |
| 4436.164636                                                | 0.501507607                                      | 0.002181251 | 0.023215495 |                  |      | CD63           |
| 12                                                         | 55725323                                         | 55729707    | -           | 2633             |      |                |
| protein_coding                                             | CD63 molecule [Source:HGNC Symbol;Acc:HGNC:1692] |             |             |                  |      |                |
| -                                                          | 5578                                             | 6953        | 6561        | 4228             | 4387 | 4545           |
| 103.7424104                                                | 125.126072                                       | 155.0336691 | 89.22697367 |                  |      |                |
| 102.4151335                                                | 80.26275202                                      |             |             |                  |      |                |
| ENSG00000126016                                            | 320.259591                                       | 251.3386235 | 290.6229125 |                  |      |                |
| 137.7838098                                                | 182.6386925                                      | 160.4508624 | 287.4070423 |                  |      |                |
| 160.2911216                                                | 0.842988271                                      | 0.002182633 | 0.023216233 |                  |      | AMOT           |
| X                                                          | 112774503                                        | 112840815   | -           | 8502             |      |                |
| protein_coding                                             | angiomotin [Source:HGNC Symbol;Acc:HGNC:17810] - |             |             |                  |      |                |
| 353                                                        | 284                                              | 250         | 133         | 160              | 186  | 2.03321024     |
| 1.582791394                                                | 1.829471948                                      | 0.869245766 | 1.156767936 |                  |      |                |
| 1.017238671                                                |                                                  |             |             |                  |      |                |
| ENSG00000162631                                            | 204.1314673                                      | 153.9891566 | 173.2112558 |                  |      |                |
| 77.69763712                                                | 102.7342645                                      | 75.04959694 | 177.1106266 |                  |      |                |
| 85.16049953                                                | 1.059157122                                      | 0.002199163 | 0.023378003 |                  |      | NTNG1          |
| 1                                                          | 107140007                                        | 107483458   | +           | 9138             |      |                |
| protein_coding                                             | netrin G1 [Source:HGNC Symbol;Acc:HGNC:23319] -  |             |             |                  |      |                |
| 225                                                        | 174                                              | 149         | 75          | 90               | 87   | 1.205757711    |
| 0.902245107                                                | 1.01447643                                       | 0.456060179 | 0.605394841 |                  |      |                |
| 0.442689394                                                |                                                  |             |             |                  |      |                |
| ENSG00000129911                                            | 1056.040124                                      | 1323.067754 | 1232.241149 |                  |      |                |
| 1377.838098                                                | 1752.189956                                      | 2340.33973  | 1203.783009 |                  |      |                |
| 1823.455928                                                | -0.599665223                                     | 0.002217431 | 0.023545514 |                  |      | KLF16          |
| 19                                                         | 1852399                                          | 1863568     | -           | 2955             |      | protein_coding |
| Kruppel like factor 16 [Source:HGNC Symbol;Acc:HGNC:16857] |                                                  |             |             |                  |      | zf-            |
| C2H2                                                       | 1164                                             | 1495        | 1060        | 1330             | 1535 | 2713           |
| 23.97232452                                                | 22.31799761                                      | 25.00956854 | 31.9299512  |                  |      |                |
| 42.689722                                                  |                                                  |             |             |                  |      |                |
| ENSG00000231595                                            | 19.05227029                                      | 2.654985459 | 16.2748831  |                  |      | 0              |
| 0                                                          | 0                                                | 12.66071295 | 0           | 6.093566089      |      |                |
| 0.002217583                                                | 0.023545514                                      | AC005224.1  | 17          | 14210488         |      |                |
| 14217922                                                   | +                                                | 1537        | lincRNA     | novel transcript |      |                |
| -                                                          | 21                                               | 3           | 14          | 0                | 0    | 0              |
| 0.669073934                                                | 0.092485538                                      | 0.566710181 | 0           | 0                |      | 0              |
| ENSG00000174371                                            | 1776.397391                                      | 1600.956232 | 1492.639278 |                  |      |                |
| 1371.622287                                                | 995.3808742                                      | 988.5843459 | 1623.330967 |                  |      |                |
| 1118.529169                                                | 0.537790543                                      | 0.002230683 | 0.023670396 |                  |      | EX01           |
| 1                                                          | 241847967                                        | 241895148   | +           | 4140             |      |                |
| protein_coding                                             | exonuclease 1 [Source:HGNC Symbol;Acc:HGNC:3511] |             |             |                  |      |                |
| -                                                          | 1958                                             | 1809        | 1284        | 1324             | 872  | 1146           |
| 23.16013198                                                | 20.70449616                                      | 19.29618833 | 17.77050164 |                  |      |                |

|                                                             |                                                     |             |                |             |  |  |  |
|-------------------------------------------------------------|-----------------------------------------------------|-------------|----------------|-------------|--|--|--|
| 12.94683174                                                 | 12.87108904                                         |             |                |             |  |  |  |
| ENSG00000128617                                             | 218.6474828                                         | 201.7788949 | 226.6858717    |             |  |  |  |
| 102.560881                                                  | 128.9885766                                         | 109.5551588 | 215.7040831    |             |  |  |  |
| 113.7015388                                                 | 0.924563609                                         | 0.002237132 | 0.023724592    | OPN1SW      |  |  |  |
| 7                                                           | 128772491                                           | 128775790   | - 1096         |             |  |  |  |
| protein_coding                                              | "opsin 1, short wave sensitive [Source:HGNC         |             |                |             |  |  |  |
| Symbol;Acc:HGNC:1012]"                                      | -                                                   | 241 228     | 195 99         | 113         |  |  |  |
| 127                                                         | 10.7680031                                          | 9.857135661 | 11.0695739     |             |  |  |  |
| 5.019225226                                                 | 6.337460267                                         | 5.387957792 |                |             |  |  |  |
| ENSG00000196967                                             | 35.38278767                                         | 72.56960256 | 60.44956579    |             |  |  |  |
| 132.6039673                                                 | 133.5545439                                         | 139.7475253 | 56.13398534    |             |  |  |  |
| 135.3020122                                                 | -1.270287306                                        | 0.002240477 | 0.023745833    |             |  |  |  |
| ZNF585A 19                                                  | 37106734                                            | 37172741    | - 10758        |             |  |  |  |
| protein_coding                                              | zinc finger protein 585A [Source:HGNC               |             |                |             |  |  |  |
| Symbol;Acc:HGNC:26305]"                                     | zf-C2H2                                             | 39 82       | 52 128         | 117         |  |  |  |
| 162                                                         | 0.177525911                                         | 0.361167575 | 0.300731313    |             |  |  |  |
| 0.661135494                                                 | 0.668500416                                         | 0.700187725 |                |             |  |  |  |
| ENSG00000101680                                             | 1.814501932                                         | 4.424975766 | 2.3249833      |             |  |  |  |
| 4.14387398                                                  | 14.83939377                                         | 81.9507093  | 2.854820332    |             |  |  |  |
| 33.64465902                                                 | -3.555578127                                        | 0.002242744 | 0.023755624    | LAMA1       |  |  |  |
| 18                                                          | 6941744 7117814                                     | - 15872     | protein_coding |             |  |  |  |
| laminin subunit                                             | alpha 1 [Source:HGNC Symbol;Acc:HGNC:6481]"         |             |                |             |  |  |  |
| 2                                                           | 5 2 4                                               | 13          | 95             | 0.006170595 |  |  |  |
| 0.014926734                                                 | 0.007839804                                         | 0.014003622 | 0.050345314    |             |  |  |  |
| 0.278306256                                                 |                                                     |             |                |             |  |  |  |
| ENSG00000174516                                             | 204.1314673                                         | 285.8534345 | 196.4610888    |             |  |  |  |
| 291.1071471                                                 | 406.3710908                                         | 582.2813556 | 228.8153302    |             |  |  |  |
| 426.5865312                                                 | -0.898537847                                        | 0.00226131  | 0.023937947    | PELI3       |  |  |  |
| 11                                                          | 66466327                                            | 66477337    | + 3926         |             |  |  |  |
| protein_coding                                              | pellino E3 ubiquitin protein ligase family member 3 |             |                |             |  |  |  |
| [Source:HGNC Symbol;Acc:HGNC:30010]"                        | -                                                   |             | 225 323        | 169         |  |  |  |
| 281                                                         | 356 675                                             | 2.806473246 | 3.898330609    |             |  |  |  |
| 2.678201543                                                 | 3.977114261                                         | 5.573744578 | 7.994374621    |             |  |  |  |
| ENSG00000177352                                             | 788.4010894                                         | 1022.169402 | 835.8314963    |             |  |  |  |
| 1040.112369                                                 | 1437.138212                                         | 1472.52485  | 882.1339959    |             |  |  |  |
| 1316.59181                                                  | -0.577540664                                        | 0.002275137 | 0.024069913    | CCDC71      |  |  |  |
| 3                                                           | 49162535                                            | 49166321    | - 1781         |             |  |  |  |
| protein_coding                                              | coiled-coil domain containing 71 [Source:HGNC       |             |                |             |  |  |  |
| Symbol;Acc:HGNC:25760]"                                     | -                                                   | 869 1155    | 719 1004       | 1259        |  |  |  |
| 1707                                                        | 23.89376239                                         | 30.72872251 | 25.11723434    |             |  |  |  |
| 31.32433335                                                 | 43.45193997                                         | 44.56568844 |                |             |  |  |  |
| ENSG00000123933                                             | 581.5478692                                         | 739.855948  | 924.1808617    |             |  |  |  |
| 822.558985                                                  | 1359.516767                                         | 1513.931524 | 748.5282263    |             |  |  |  |
| 1232.002426                                                 | -0.72011286                                         | 0.002288437 | 0.024196151    | MXD4        |  |  |  |
| 4                                                           | 2247432 2262294                                     | - 7058      | protein_coding | MAX         |  |  |  |
| dimerization protein 4 [Source:HGNC Symbol;Acc:HGNC:13906]" |                                                     |             |                | bHLH        |  |  |  |
| 641                                                         | 836 795 794                                         | 1191 1755   | 4.447388401    |             |  |  |  |
| 5.612431639                                                 | 7.007971407                                         | 6.251020052 | 10.37235728    |             |  |  |  |
| 11.56182748                                                 |                                                     |             |                |             |  |  |  |
| ENSG00000103021                                             | 25.40302705                                         | 13.2749273  | 0 56.97826722  |             |  |  |  |

|                                     |                                                              |             |             |                |             |
|-------------------------------------|--------------------------------------------------------------|-------------|-------------|----------------|-------------|
|                                     | 90.17785443                                                  | 66.42320649 | 12.89265145 | 71.19310938    |             |
|                                     | -2.445926411                                                 | 0.002297911 | 0.024281805 | CCDC113 16     |             |
|                                     | 58231157                                                     | 58283836    | + 5927      | protein_coding |             |
|                                     | coiled-coil domain containing 113 [Source:HGNC               |             |             |                |             |
| Symbol;Acc:HGNC:25002]              | -                                                            | 28          | 15          | 0              | 55 79       |
|                                     | 77                                                           | 0.231340563 | 0.119917557 | 0              | 0.515631934 |
|                                     | 0.819293528                                                  | 0.604069372 |             |                |             |
| ENSG00000123572                     | 35.38278767                                                  | 33.62981582 | 44.1746827  |                |             |
| 6.215810969                         | 0                                                            | 8.626390453 | 37.7290954  | 4.947400474    |             |
|                                     | 2.900016098                                                  | 0.002304546 | 0.024337384 | NRK X          |             |
|                                     | 105822543                                                    | 105958610   | + 9573      | protein_coding |             |
|                                     | Nik related kinase [Source:HGNC Symbol;Acc:HGNC:25391] -     |             |             |                |             |
|                                     | 39                                                           | 38          | 38          | 6              | 0           |
|                                     | 0.188088385                                                  | 0.246968966 | 0.034826933 | 0              | 0.199501071 |
|                                     | 0.048571661                                                  |             |             |                |             |
| ENSG00000116132                     | 5195.826282                                                  | 5390.505478 | 5733.408817 |                |             |
| 7164.758111                         | 7203.954928                                                  | 6625.067868 | 5439.913526 |                |             |
| 6997.926969                         | -0.363381121                                                 | 0.002308986 | 0.024369718 | PRRX1          |             |
|                                     | 1                                                            | 170662728   | 170739419   | + 8246         |             |
|                                     | protein_coding paired related homeobox 1 [Source:HGNC        |             |             |                |             |
| Symbol;Acc:HGNC:9142]               | Homeobox                                                     | 5727        | 6091        | 4932           | 6916        |
|                                     | 6311                                                         | 7680        | 34.01046237 | 35.00029541    | 37.21230605 |
|                                     | 46.60405411                                                  | 47.04377995 | 43.30608338 |                |             |
| ENSG00000119986                     | 131.5513901                                                  | 145.1392051 | 142.9864729 |                |             |
| 191.6541716                         | 336.7400893                                                  | 271.7312993 | 139.892356  |                |             |
| 266.70852                           | -0.930518725                                                 | 0.002316735 | 0.024436922 | AVPI1          |             |
|                                     | 10                                                           | 97677424    | 97687323    | - 1457         |             |
|                                     | protein_coding arginine vasopressin induced 1 [Source:HGNC   |             |             |                |             |
| Symbol;Acc:HGNC:30898]              | -                                                            | 145         | 164         | 123            | 185         |
|                                     | 315                                                          | 4.87345695  | 5.333480813 | 5.252334857    | 295         |
| 7.055441906                         | 12.44542765                                                  | 10.05268375 |             |                |             |
| ENSG00000166016                     | 165.1196758                                                  | 92.03949592 | 165.0738143 |                |             |
| 37.29486582                         | 83.32890346                                                  | 39.68139608 | 140.7443287 |                |             |
| 53.43505512                         | 1.401896976                                                  | 0.002340353 | 0.024671339 | ABTB2          |             |
|                                     | 11                                                           | 34150988    | 34358008    | - 4973         |             |
|                                     | protein_coding ankyrin repeat and BTB domain containing 2    |             |             |                |             |
| [Source:HGNC Symbol;Acc:HGNC:23842] | -                                                            | 182         | 104         | 142            |             |
|                                     | 36                                                           | 73          | 46          | 1.792179942    | 0.990926222 |
| 1.776547123                         | 0.40225003                                                   | 0.90230167  | 0.430100939 |                |             |
| ENSG00000152518                     | 1186.684264                                                  | 1107.128937 | 1257.815965 |                |             |
| 874.3574097                         | 831.0060509                                                  | 848.8368206 | 1183.876388 |                |             |
| 851.4000937                         | 0.475142276                                                  | 0.002359176 | 0.0248522   |                |             |
| ZFP36L2 2                           | 43222402                                                     | 43226609    | - 3696      |                |             |
|                                     | protein_coding ZFP36 ring finger protein like 2 [Source:HGNC |             |             |                |             |
| Symbol;Acc:HGNC:1108]               | Others                                                       | 1308        | 1251        | 1082           | 844         |
|                                     | 984                                                          | 17.33023552 | 16.0380583  | 18.21386632    | 728         |
| 12.68885772                         | 12.10728532                                                  | 12.37924488 |             |                |             |
| ENSG00000146410                     | 347.47712                                                    | 274.3484975 | 235.9858049 |                |             |
| 173.0067386                         | 158.6673641                                                  | 141.4728034 | 285.9371408 |                |             |
| 157.7156354                         | 0.860632637                                                  | 0.00236032  | 0.0248522   | MTRF2          |             |

|                                     |                                           |             |             |                |                        |  |
|-------------------------------------|-------------------------------------------|-------------|-------------|----------------|------------------------|--|
| 6                                   | 136231024                                 | 136250335   | -           | 2450           |                        |  |
| protein_coding                      | mitochondrial fission regulator 2         |             |             |                | [Source:HGNC           |  |
| Symbol;Acc:HGNC:21115]              | -                                         | 383 310     | 203 167     | 139            |                        |  |
| 164                                 | 7.655285166                               | 5.995453656 | 5.155096509 |                |                        |  |
| 3.787585371                         | 3.487354332                               | 3.112495855 |             |                |                        |  |
| ENSG00000157216                     | 1330.937167                               | 1240.763205 | 1725.137608 |                |                        |  |
| 976.9182907                         | 940.5892664                               | 1059.320748 | 1432.279327 |                |                        |  |
| 992.2761016                         | 0.528261991                               | 0.002362805 | 0.024863573 | SSBP3          |                        |  |
| 1                                   | 54225432                                  | 54413479    | -           | 5227           |                        |  |
| protein_coding                      | single stranded DNA binding protein 3     |             |             |                | [Source:HGNC           |  |
| Symbol;Acc:HGNC:15674]              | -                                         | 1467 1402   | 1484 943    | 824            |                        |  |
| 1228                                | 13.74378325                               | 12.70930946 | 17.66396711 |                |                        |  |
| 10.02469657                         | 9.689961952                               | 10.9238791  |             |                |                        |  |
| ENSG00000128609                     | 1600.390704                               | 1461.126998 | 1575.176186 |                |                        |  |
| 1220.370887                         | 1102.681106                               | 1062.771304 | 1545.564629 |                |                        |  |
| 1128.607766                         | 0.453675341                               | 0.002374155 | 0.024968149 | NDUFA5         |                        |  |
| 7                                   | 123536997                                 | 123558255   | -           | 9851           |                        |  |
| protein_coding                      | NADH:ubiquinone oxidoreductase subunit A5 |             |             |                | [Source:HGNC           |  |
| Symbol;Acc:HGNC:7688]               | -                                         | 1764 1651   | 1355 1178   | 966            |                        |  |
| 1232                                | 8.768936906                               | 7.941329115 | 8.557872715 |                |                        |  |
| 6.644725049                         | 6.027596438                               | 5.815156497 |             |                |                        |  |
| ENSG00000140830                     | 771.1633211                               | 757.5558511 | 730.0447561 |                |                        |  |
| 1030.788652                         | 947.4382174                               | 1332.777325 | 752.9213094 |                |                        |  |
| 1103.668065                         | -0.5524664                                | 0.002376956 | 0.024982754 | TXNL4B         |                        |  |
| 16                                  | 72044289                                  | 72094431    | -           | 3170           |                        |  |
| protein_coding                      | thioredoxin like 4B                       |             |             |                | [Source:HGNC           |  |
| Symbol;Acc:HGNC:26041]              | -                                         | 850 856     | 628 995     | 830            |                        |  |
| 1545                                | 13.13071415                               | 12.79501924 | 12.32557612 |                |                        |  |
| 17.44117992                         | 16.09408128                               | 22.6621046  |             |                |                        |  |
| ENSG00000178078                     | 356.5496296                               | 328.3332018 | 358.0474282 |                |                        |  |
| 468.2577597                         | 561.6139795                               | 587.4571898 | 347.6434199 |                |                        |  |
| 539.109643                          | -0.633680487                              | 0.002382457 | 0.025018499 | STAP2          |                        |  |
| 19                                  | 4324043 4342786                           | -           | 2766        | protein_coding | signal                 |  |
| transducing adaptor family member 2 |                                           |             |             |                | [Source:HGNC           |  |
| Symbol;Acc:HGNC:30430]              | -                                         | 393 371     | 308 452     | 492            |                        |  |
| 681                                 | 6.957753816                               | 6.355477341 | 6.927960252 |                |                        |  |
| 9.080260389                         | 10.93352714                               | 11.44790335 |             |                |                        |  |
| ENSG00000269927                     | 23.58852512                               | 23.89486913 | 30.2247829  |                |                        |  |
| 5.179842475                         | 0 0                                       | 25.90272572 | 1.726614158 |                |                        |  |
| 3.922056534                         | 0.002383186                               | 0.025018499 | AC004817.3  | 14             |                        |  |
| 71141125                            | 71143253                                  | -           | 2129        | lincRNA        | novel                  |  |
| transcript                          | -                                         | 26 27       | 5 0         | 0              |                        |  |
| 0.598034681                         | 0.600917074                               | 0.759809174 | 0.13049876  |                |                        |  |
| 0                                   | 0                                         |             |             |                |                        |  |
| ENSG00000048471                     | 614.208904                                | 625.6915733 | 630.0704742 |                |                        |  |
| 1124.025817                         | 1027.342645                               | 711.6772124 | 623.3236505 |                |                        |  |
| 954.3485582                         | -0.613699924                              | 0.002391199 | 0.025087737 | SNX29          |                        |  |
| 16                                  | 11976737                                  | 12574289    | +           | 11298          |                        |  |
| protein_coding                      | sorting nexin 29                          |             |             |                | [Source:HGNC           |  |
| -                                   | 677 707                                   | 542 1085    | 900 825     |                | Symbol;Acc:HGNC:30542] |  |

|                 |                                                                                           |             |                         |       |
|-----------------|-------------------------------------------------------------------------------------------|-------------|-------------------------|-------|
| 2.934376134     | 2.965133723                                                                               | 2.984726646 | 5.336299685             |       |
| 4.896528642     | 3.395340988                                                                               |             |                         |       |
| ENSG00000240038 | 9.979760626                                                                               | 20.35488852 | 9.299933199             |       |
| 33.15099184     | 58.21608324                                                                               | 78.50015312 | 13.21152745             |       |
| 56.6224094      | -2.09289343                                                                               | 0.002399291 | 0.025157711             | AMY2B |
| 1               | 103553815                                                                                 | 103579534   | + 7491                  |       |
| protein_coding  | "amylase, alpha 2B (pancreatic) [Source:HGNC Symbol;Acc:HGNC:478]"                        | -           | 11 23 8 32              | 51    |
| 91              | 0.071908722                                                                               | 0.145483748 | 0.066444194             |       |
| 0.23736803      | 0.418482922                                                                               | 0.564849324 |                         |       |
| ENSG00000182054 | 1670.249028                                                                               | 1732.82051  | 2492.382097             |       |
| 1338.471295     | 1523.891591                                                                               | 1046.381162 | 1965.150545             |       |
| 1302.914683     | 0.592957498                                                                               | 0.002407951 | 0.025233555             | IDH2  |
| 15              | 90083045                                                                                  | 90102504    | - 2814                  |       |
| protein_coding  | "isocitrate dehydrogenase (NADP(+)) 2, mitochondrial [Source:HGNC Symbol;Acc:HGNC:5383]"  | -           | 1841 1958 2144          |       |
| 1292            | 1335 1213                                                                                 | 32.03748228 | 32.96970302             |       |
| 47.40318629     | 25.51234999                                                                               | 29.16114234 | 20.04323073             |       |
| ENSG00000077232 | 2219.135863                                                                               | 1827.514991 | 1889.048931             |       |
| 1689.664615     | 1278.470848                                                                               | 1034.304215 | 1978.566595             |       |
| 1334.146559     | 0.569124099                                                                               | 0.002412343 | 0.025264616             |       |
| DNAJC10 2       | 182716041                                                                                 | 182794464   | + 21835                 |       |
| protein_coding  | DnaJ heat shock protein family (Hsp40) member C10 [Source:HGNC Symbol;Acc:HGNC:24637]     | -           | 2446 2065 1625          |       |
| 1631            | 1120 1199                                                                                 | 5.485698568 | 4.481189406             |       |
| 4.630277456     | 4.150618414                                                                               | 3.152914448 | 2.553271543             |       |
| ENSG00000067141 | 1046.967615                                                                               | 962.8747266 | 1191.553941             |       |
| 779.0483082     | 787.6293614                                                                               | 468.4130016 | 1067.132094             |       |
| 678.3635571     | 0.654660439                                                                               | 0.002434357 | 0.025466601             | NEO1  |
| 15              | 73051710                                                                                  | 73305206    | + 8117                  |       |
| protein_coding  | neogenin 1 [Source:HGNC Symbol;Acc:HGNC:7754]                                             | -           |                         |       |
| 1154            | 1088 1025                                                                                 | 752 690     | 543 6.962078991         |       |
|                 | 6.351258516                                                                               | 7.856609468 | 5.147950215 5.225175778 |       |
|                 | 3.110536499                                                                               |             |                         |       |
| ENSG00000090857 | 951.7062633                                                                               | 1086.774048 | 875.3562124             |       |
| 1412.025059     | 1348.101849                                                                               | 1310.34871  | 971.2788412             |       |
| 1356.825206     | -0.481424086                                                                              | 0.002434509 | 0.025466601             | PDPR  |
| 16              | 70113626                                                                                  | 70162537    | + 10385                 |       |
| protein_coding  | pyruvate dehydrogenase phosphatase regulatory subunit [Source:HGNC Symbol;Acc:HGNC:30264] | -           | 1049 1228 753           |       |
| 1363            | 1181 1519                                                                                 | 4.946496099 | 5.602970124             |       |
| 4.511233659     | 7.292919144                                                                               | 6.990218594 | 6.801149025             |       |
| ENSG00000110013 | 216.8329809                                                                               | 180.5390112 | 240.6357715             |       |
| 128.4600934     | 105.0172482                                                                               | 94.02765594 | 212.6692545             |       |
| 109.1683325     | 0.962078305                                                                               | 0.002435991 | 0.025467046             | SIAE  |
| 11              | 124633113                                                                                 | 124695707   | - 8139                  |       |
| protein_coding  | sialic acid acetyltransferase [Source:HGNC Symbol;Acc:HGNC:18187]                         | -           | 239 204 207 124         | 92    |
| 109             | 1.437988908                                                                               | 1.187642033 | 1.582363088             |       |
| 0.846569622     | 0.694806926                                                                               | 0.6227109   |                         |       |

|                        |                                                   |                 |                |             |
|------------------------|---------------------------------------------------|-----------------|----------------|-------------|
| ENSG00000214022        | 2044.036426                                       | 1939.909376     | 1958.79843     |             |
| 1499.046412            | 1587.815133                                       | 1255.139811     | 1980.914744    |             |
| 1447.333785            | 0.453487297                                       | 0.002439168     | 0.0254852      | REPIN1      |
| 7                      | 150368189                                         | 150374044       | + 4649         |             |
| protein_coding         | replication initiator 1 [Source:HGNC              |                 |                |             |
| Symbol;Acc:HGNC:17922] | zf-C2H2                                           | 2253 2192       | 1685 1447      | 1391        |
| 1455                   | 23.73178084                                       | 22.34124877     | 22.55003424    |             |
| 17.29501841            | 18.39140652                                       | 14.55239469     |                |             |
| ENSG00000145390        | 1095.959167                                       | 955.7947654     | 1074.142285    |             |
| 1628.542474            | 1586.673641                                       | 1234.436474     | 1041.965406    |             |
| 1483.21753             | -0.509055437                                      | 0.002443762     | 0.025518131    | USP53       |
| 4                      | 119212587                                         | 119295517       | + 11950        |             |
| protein_coding         | ubiquitin specific peptidase 53 [Source:HGNC      |                 |                |             |
| Symbol;Acc:HGNC:29255] | -                                                 | 1208 1080       | 924 1572       | 1390        |
| 1431                   | 4.950256612                                       | 4.282351295     | 4.810729219    |             |
| 7.30965164             | 7.149805954                                       | 5.568045129     |                |             |
| ENSG00000082458        | 215.9257299                                       | 147.7941906     | 203.4360387    |             |
| 123.2802509            | 62.78205055                                       | 69.87376267     | 189.0519864    |             |
| 85.31202137            | 1.147577883                                       | 0.002450181     | 0.025570055    | DLG3        |
| X                      | 70444861                                          | 70505490        | + 7844         |             |
| protein_coding         | discs large MAGUK scaffold protein 3 [Source:HGNC |                 |                |             |
| Symbol;Acc:HGNC:2902]  | -                                                 | 238 167         | 175 119        | 55          |
| 81                     | 1.485826349                                       | 1.008800589     | 1.388057031    |             |
| 0.842988054            | 0.430995231                                       | 0.480151679     |                |             |
| ENSG00000119333        | 1987.786866                                       | 2266.472587     | 2363.345524    |             |
| 1709.348017            | 1385.771079                                       | 1704.574753     | 2205.868326    |             |
| 1599.89795             | 0.462686367                                       | 0.002465439     | 0.025714124    | WDR34       |
| 9                      | 128633661                                         | 128656787       | - 2604         |             |
| protein_coding         | WD repeat domain 34 [Source:HGNC                  |                 |                |             |
| Symbol;Acc:HGNC:28296] | -                                                 | 2191 2561       | 2033 1650      | 1214        |
| 1976                   | 41.20311792                                       | 46.60097888     | 48.57393031    |             |
| 35.20910681            | 28.65662675                                       | 35.28393217     |                |             |
| ENSG00000125650        | 152.4181623                                       | 180.5390112     | 149.9614228    |             |
| 190.6182031            | 369.8433523                                       | 374.3853456     | 160.9728655    |             |
| 311.6156337            | -0.95247081                                       | 0.002474464     | 0.025793044    | PSPN        |
| 19                     | 6375148 6379058                                   | - 3911          | protein_coding |             |
| persephin [Source:HGNC | Symbol;Acc:HGNC:9579]                             |                 |                |             |
| 129                    | 184 324                                           | 434 2.103536971 | 2.471546537    | 204         |
|                        | 2.052148294                                       | 2.614219505     | 5.09218947     | 5.159800755 |
| ENSG00000272325        | 203.2242164                                       | 315.9432697     | 259.2356379    |             |
| 102.560881             | 98.16829722                                       | 180.2915605     | 259.467708     |             |
| 127.0069129            | 1.026455029                                       | 0.002480893     | 0.025844824    | NUDT3       |
| 6                      | 34279679                                          | 34392674        | - 9905         |             |
| protein_coding         | nudix hydrolase 3 [Source:HGNC                    |                 |                |             |
| Symbol;Acc:HGNC:8050]  | -                                                 | 224 357         | 223 99         | 86 209      |
| 1.107445141            | 1.707812457                                       | 1.400739029     | 0.555383225    |             |
| 0.533692785            | 0.981121571                                       |                 |                |             |
| ENSG00000115363        | 685.8817303                                       | 914.1999932     | 1171.791583    |             |
| 581.1783256            | 576.4533732                                       | 617.6495564     | 923.9577688    |             |
| 591.7604184            | 0.641444558                                       | 0.002485134     | 0.025873766    | EVA1A       |

|                                                                        |                                                                                           |             |             |                |             |
|------------------------------------------------------------------------|-------------------------------------------------------------------------------------------|-------------|-------------|----------------|-------------|
| 2                                                                      | 75469302                                                                                  | 75569722    | -           | 2744           |             |
| protein_coding                                                         | "eva-1 homolog A, regulator of programmed cell death [Source:HGNC Symbol;Acc:HGNC:25816]" |             |             |                |             |
|                                                                        | 561                                                                                       | 505         | 716         | 13.49169057    | 17.83785607 |
| 22.85510768                                                            | 11.3603261                                                                                | 11.31239683 | 12.13276912 |                |             |
| ENSG00000105429                                                        | 1991.41587                                                                                | 2193.017989 | 2986.441049 |                |             |
| 1323.967736                                                            | 1671.144036                                                                               | 1858.987143 | 2390.291636 |                |             |
| 1618.032972                                                            | 0.562147843                                                                               | 0.002492416 | 0.025934322 |                | MEGF8       |
| 19                                                                     | 42325609                                                                                  | 42378769    | +           | 11372          |             |
| protein_coding                                                         | multiple EGF like domains 8 [Source:HGNC Symbol;Acc:HGNC:3233]                            |             |             |                |             |
|                                                                        | 2155                                                                                      | 9.452057548 | 10.32501977 | 14.05510518    |             |
| 6.244620443                                                            | 7.913189862                                                                               | 8.811329492 |             |                |             |
| ENSG00000164266                                                        | 0                                                                                         | 0.884995153 | 0           | 39.36680281    | 0           |
|                                                                        | 18.978059                                                                                 | 0.294998384 | 19.44828727 | -5.797083149   |             |
|                                                                        | 0.002508992                                                                               | 0.02609145  | SPINK1      | 5              | 147824568   |
|                                                                        | 147831786                                                                                 | -           | 1480        | protein_coding | "serine     |
| peptidase inhibitor, Kazal type 1 [Source:HGNC Symbol;Acc:HGNC:11244]" | -                                                                                         | 0           | 1           | 0              | 38          |
|                                                                        | 22                                                                                        | 0           | 0.032015827 | 0              | 1.426704151 |
|                                                                        | 0.691181306                                                                               |             |             |                | 0           |
| ENSG00000163159                                                        | 1261.986094                                                                               | 1513.341712 | 1583.313627 |                |             |
| 1725.923513                                                            | 2351.473166                                                                               | 2098.800797 | 1452.880478 |                |             |
| 2058.732492                                                            | -0.503065956                                                                              | 0.002516482 | 0.026153965 |                | VPS72       |
| 1                                                                      | 151169987                                                                                 | 151195321   | -           | 4545           |             |
| protein_coding                                                         | vacuolar protein sorting 72 homolog [Source:HGNC Symbol;Acc:HGNC:11644]                   |             |             |                |             |
|                                                                        | 2433                                                                                      | 14.98724911 | 17.82742687 | 18.64447104    |             |
| 20.36822356                                                            | 27.85997312                                                                               | 24.89082202 |             |                |             |
| ENSG00000198774                                                        | 202.3169654                                                                               | 107.9694087 | 148.7989312 |                |             |
| 62.15810969                                                            | 55.93309958                                                                               | 80.22543121 | 153.0284351 |                |             |
| 66.10554683                                                            | 1.207722222                                                                               | 0.002524541 | 0.026211886 |                | RASSF9      |
| 12                                                                     | 85800697                                                                                  | 85836570    | -           | 5682           |             |
| protein_coding                                                         | Ras association domain family member 9 [Source:HGNC Symbol;Acc:HGNC:15739]                |             |             |                |             |
|                                                                        | 93                                                                                        | 1.921906773 | 1.017384325 | 1.401572562    |             |
| 0.586762114                                                            | 0.530080967                                                                               | 0.761049206 |             |                |             |
| ENSG00000185164                                                        | 585.1768731                                                                               | 761.0958317 | 1053.217435 |                |             |
| 486.9051926                                                            | 567.3214386                                                                               | 401.9897951 | 799.8300465 |                |             |
| 485.4054754                                                            | 0.720431454                                                                               | 0.002525019 | 0.026211886 |                | NOMO2       |
| 16                                                                     | 18417325                                                                                  | 18562211    | -           | 6801           |             |
| protein_coding                                                         | NODAL modulator 2 [Source:HGNC Symbol;Acc:HGNC:22652]                                     |             |             |                |             |
|                                                                        | 645                                                                                       | 860         | 906         | 470            | 497         |
| 4.644250359                                                            | 5.991728376                                                                               | 8.288239067 | 3.840052189 |                |             |
| 4.491909255                                                            | 3.185988178                                                                               |             |             |                |             |
| ENSG00000127554                                                        | 459.9762398                                                                               | 565.5119028 | 519.6337675 |                |             |
| 300.4308635                                                            | 386.9657298                                                                               | 273.4565774 | 515.0406367 |                |             |
| 320.2843902                                                            | 0.687206339                                                                               | 0.002528036 | 0.02622782  |                | GFER        |
| 16                                                                     | 1984207                                                                                   | 1987749     | +           | 2687           |             |
| protein_coding                                                         | "growth factor, augmenter of liver regeneration                                           |             |             |                |             |



|                                     |                                    |              |             |                  |
|-------------------------------------|------------------------------------|--------------|-------------|------------------|
| [Source:HGNC Symbol;Acc:HGNC:4236]" | -                                  | 507          | 639         | 447              |
| 290                                 | 339 317                            | 9.239936284  | 11.26833196 |                  |
| 10.35015142                         | 5.997114975                        | 7.754956963  | 5.485580769 |                  |
| ENSG00000240996                     | 10.88701159                        | 8.849951531  | 15.11239145 | 0                |
| 0                                   | 0 11.61645152                      | 0            | 5.969365176 |                  |
| 0.002540748                         | 0.026323561                        | AL157400.4   | 10          | 89694295         |
| 89697928                            | -                                  | 667          | lincRNA     | novel transcript |
| -                                   | 12 10                              | 13           | 0           | 0                |
| 0.881016609                         | 0.710396163                        | 1.21261899   | 0           | 0                |
| ENSG00000170006                     | 238.6070041                        | 273.4635023  | 142.9864729 | 0                |
| 406.09965                           | 406.3710908                        | 363.1710381  | 218.3523264 |                  |
| 391.880593                          | -0.83978429                        | 0.002541483  | 0.026323561 |                  |
| TMEM154 4                           | 152618632                          | 152680165    | -           | 11587            |
| protein_coding                      | transmembrane protein 154          | [Source:HGNC |             |                  |
| Symbol;Acc:HGNC:26489]              | -                                  | 263 309      | 123 392     | 356              |
| 421                                 | 1.11151013                         | 1.2636125    | 0.660451531 |                  |
| 1.879866911                         | 1.888540711                        | 1.689437411  |             |                  |
| ENSG00000137252                     | 35.38278767                        | 46.01974796  | 49.98714095 |                  |
| 8.287747959                         | 0 11.21430759                      | 43.79655886  | 6.500685183 |                  |
| 2.725912014                         | 0.002541729                        | 0.026323561  | HCRTR2      | 6                |
| 55106460                            | 55282620                           | +            | 1964        | protein_coding   |
| hypocretin receptor 2               | [Source:HGNC Symbol;Acc:HGNC:4849] |              |             |                  |
| -                                   | 39 52                              | 43 8         | 0           | 13               |
| 0.972415353                         | 1.254550942                        | 1.362177865  | 0.226339602 | 0                |
| 0.307774679                         |                                    |              |             |                  |
| ENSG00000257167                     | 139.7166488                        | 101.7744426  | 144.1489646 |                  |
| 44.54664528                         | 41.09370581                        | 71.59904076  | 128.5466853 |                  |
| 52.41313062                         | 1.28744592                         | 0.002545757  | 0.026349856 | TMPO-            |
| AS1 12                              | 98512973                           | 98516422     | -           | 3357             |
| antisense                           | TMPO antisense RNA 1               | [Source:HGNC |             |                  |
| Symbol;Acc:HGNC:44158]              | -                                  | 154 115      | 124 43      | 36               |
| 83                                  | 2.246456757                        | 1.623203386  | 2.29814375  |                  |
| 0.711752757                         | 0.659171648                        | 1.149629155  |             |                  |
| ENSG00000033170                     | 1011.584827                        | 855.7903131  | 1055.542418 |                  |
| 754.1850643                         | 433.7668947                        | 664.2320649  | 974.3058527 |                  |
| 617.3946746                         | 0.656829681                        | 0.002547914  | 0.026356756 | FUT8             |
| 14                                  | 65410592                           | 65744121     | +           | 6700             |
| protein_coding                      | fucosyltransferase 8               | [Source:HGNC |             |                  |
| Symbol;Acc:HGNC:4019]               | -                                  | 115 967      | 908 728     | 380              |
| 770                                 | 8.14945842                         | 6.8387718    | 8.431753322 |                  |
| 6.037659547                         | 3.48623095                         | 5.343759948  |             |                  |
| ENSG00000137434                     | 66.22932052                        | 69.9146171   | 52.31212425 |                  |
| 117.0644399                         | 117.5736583                        | 207.0333709  | 62.81868729 |                  |
| 147.223823                          | -1.2285942                         | 0.002557804  | 0.026443597 |                  |
| C6orf52 6                           | 10671418                           | 10694797     | -           | 884              |
| protein_coding                      | chromosome 6 open reading frame 52 | [Source:HGNC |             |                  |
| Symbol;Acc:HGNC:20881]              | -                                  | 73 79        | 45 113      | 103              |
| 240                                 | 4.043889488                        | 4.234491516  | 3.16713879  |                  |
| 7.102941243                         | 7.161967071                        | 12.62379679  |             |                  |
| ENSG00000224032                     | 182.3574442                        | 261.0735702  | 233.6608216 |                  |

|                                                                      |              |             |             |             |             |
|----------------------------------------------------------------------|--------------|-------------|-------------|-------------|-------------|
| 370.8767212                                                          | 355.0039586  | 413.2041027 | 225.6972787 |             |             |
| 379.6949275                                                          | -0.751343482 | 0.002565219 | 0.026504766 |             |             |
| EPB41L4A-AS1                                                         | 5            | 112160526   | 112164276   | +           | 3344        |
| lincRNA EPB41L4A antisense RNA 1 [Source:HGNC                        |              |             |             |             |             |
| Symbol;Acc:HGNC:30749]                                               | -            | 201         | 295         | 201         | 358         |
| 479                                                                  | 2.943462263  | 4.180056847 | 3.739698888 |             | 311         |
| 5.948792239                                                          | 5.71664838   | 6.660399243 |             |             |             |
| ENSG00000179954                                                      | 291.2275601  | 192.9289434 | 383.6222445 |             |             |
| 155.3952742                                                          | 100.4512809  | 172.5278091 | 289.2595826 |             |             |
| 142.7914547                                                          | 1.01384921   | 0.002569583 | 0.02653436  |             | SSC5D       |
| 19                                                                   | 55488404     | 55519098    | +           | 7314        |             |
| protein_coding scavenger receptor cysteine rich family member with 5 |              |             |             |             |             |
| domains [Source:HGNC Symbol;Acc:HGNC:26641]                          | -            |             |             | 321         | 218         |
| 330                                                                  | 150          | 88          | 200         | 2.149209541 | 1.412303315 |
|                                                                      | 2.807151362  | 1.139589258 | 0.739562831 |             | 1.271469825 |
| ENSG00000283041                                                      | 3449.368173  | 3576.265414 | 4397.705912 |             |             |
| 4353.139616                                                          | 6106.981281  | 5438.93918  | 3807.779833 |             |             |
| 5299.686692                                                          | -0.477184495 | 0.002574065 | 0.026549666 |             |             |
| AC008038.1                                                           | 7            | 133034607   | 133035920   | -           | 1314        |
| processed_pseudogene eukaryotic translation elongation               |              |             |             |             |             |
| factor 1 gamma (                                                     | -            | 3802        | 4041        | 3783        | 4202        |
| 6305                                                                 | 141.6920328  | 145.7202562 | 179.1215434 |             | 5350        |
| 177.6939848                                                          | 250.2682616  | 223.1108772 |             |             |             |
| ENSG00000140199                                                      | 650.4989426  | 623.9215829 | 647.507849  |             |             |
| 859.8538508                                                          | 860.6848384  | 1049.831718 | 640.6427915 |             |             |
| 923.4568024                                                          | -0.528370987 | 0.002574067 | 0.026549666 |             |             |
| SLC12A6 15                                                           | 34229996     | 34338060    | -           | 10056       |             |
| protein_coding solute carrier family 12 member 6 [Source:HGNC        |              |             |             |             |             |
| Symbol;Acc:HGNC:10914]                                               | -            | 717         | 705         | 557         | 830         |
| 1217                                                                 | 3.491584642  | 3.321928596 | 3.446170632 |             | 754         |
| 4.58632547                                                           | 4.608859207  | 5.627251579 |             |             |             |
| ENSG00000130726                                                      | 14400.79458  | 16138.77161 | 16076.09703 |             |             |
| 16867.63903                                                          | 22092.43284  | 24266.89898 | 15538.55441 |             |             |
| 21075.65695                                                          | -0.439772975 | 0.002586147 | 0.026658716 |             | TRIM28      |
| 19                                                                   | 58544091     | 58550722    | +           | 4034        |             |
| protein_coding tripartite motif containing 28 [Source:HGNC           |              |             |             |             |             |
| Symbol;Acc:HGNC:16384]                                               | -            | 15873       | 18236       | 13829       | 16282       |
| 28131                                                                | 192.6867297  | 214.2003275 | 213.2856954 |             | 19354       |
| 224.2765672                                                          | 294.9050456  | 324.2502316 |             |             |             |
| ENSG00000112531                                                      | 3983.738992  | 3217.842377 | 3773.447896 |             |             |
| 2914.179376                                                          | 2717.892043  | 2587.917136 | 3658.343088 |             |             |
| 2739.996185                                                          | 0.417025613  | 0.002588935 | 0.026671909 |             | QKI         |
| 6                                                                    | 163414000    | 163578596   | +           | 17368       |             |
| protein_coding "QKI, KH domain containing RNA binding [Source:HGNC   |              |             |             |             |             |
| Symbol;Acc:HGNC:21100]"                                              | -            | 4391        | 3636        | 3246        | 2813        |
| 3000                                                                 | 12.38061761  | 9.919744925 | 11.62801415 |             | 2381        |
| 8.999781495                                                          | 8.426688597  | 8.031607237 |             |             |             |
| ENSG00000157873                                                      | 47.17705023  | 25.66485944 | 24.41232465 |             |             |
| 45.58261378                                                          | 119.856642   | 144.9233596 | 32.41807811 |             |             |
| 103.4542051                                                          | -1.671633666 | 0.002592268 | 0.02667899  |             |             |

|                                                 |                                                      |                  |             |             |             |                |  |
|-------------------------------------------------|------------------------------------------------------|------------------|-------------|-------------|-------------|----------------|--|
| TNFRSF14                                        | 1                                                    | 2555639          | 2565382     | +           | 6219        | protein_coding |  |
| TNF receptor superfamily member 14 [Source:HGNC |                                                      |                  |             |             |             |                |  |
| Symbol;Acc:HGNC:11912]                          | -                                                    | 52               | 29          | 21          | 44          | 105            |  |
| 168                                             | 0.409459989                                          | 0.220955025      | 0.210090098 |             |             |                |  |
| 0.393137221                                     | 1.037805821                                          | 1.256087064      |             |             |             |                |  |
| ENSG00000117682                                 | 627.8176685                                          | 794.7256475      | 764.9195056 |             |             |                |  |
| 1000.745566                                     | 1244.226093                                          | 966.1557307      | 729.1542739 |             |             |                |  |
| 1070.375796                                     | -0.553468488                                         | 0.002592639      | 0.02667899  |             |             | DHDDS          |  |
| 1                                               | 26432282                                             | 26471294         | +           | 5596        |             |                |  |
| protein_coding                                  | dehydrodolichyl diphosphate synthase subunit         |                  |             |             |             |                |  |
| [Source:HGNC                                    | Symbol;Acc:HGNC:20603]                               |                  |             |             |             |                |  |
| 966                                             | 1090                                                 | 1120             | 6.055598492 | 7.603701716 |             | 658            |  |
| 7.315685625                                     | 9.59205067                                           | 11.9728117       | 9.30617757  |             |             |                |  |
| ENSG00000167565                                 | 382.8599076                                          | 412.4077414      | 519.6337675 |             |             |                |  |
| 292.1431156                                     | 284.2314652                                          | 204.4454537      | 438.3004722 |             |             |                |  |
| 260.2733448                                     | 0.752592787                                          | 0.002604681      | 0.026787325 |             |             |                |  |
| SERTAD3                                         | 19                                                   | 40440844         | 40444705    | -           | 2218        |                |  |
| protein_coding                                  | SERTA domain containing 3 [Source:HGNC               |                  |             |             |             |                |  |
| Symbol;Acc:HGNC:17931]                          | -                                                    | 422              | 466         | 447         | 282         | 249            |  |
| 237                                             | 9.317075027                                          | 9.95521894       | 12.53870913 |             |             |                |  |
| 7.064795744                                     | 6.900573173                                          | 4.96841452       |             |             |             |                |  |
| ENSG00000151247                                 | 1263.800596                                          | 1221.293311      | 1097.392117 |             |             |                |  |
| 975.8823222                                     | 751.1016229                                          | 765.1608332      | 1194.162008 |             |             |                |  |
| 830.7149261                                     | 0.524064075                                          | 0.00260843       | 0.026810293 |             |             | EIF4E          |  |
| 4                                               | 98871684                                             | 98930637         | -           | 14067       |             |                |  |
| protein_coding                                  | eukaryotic translation initiation factor 4E          |                  |             |             |             |                |  |
| [Source:HGNC                                    | Symbol;Acc:HGNC:3287]                                |                  |             |             |             |                |  |
| 942                                             | 658                                                  | 887              | 4.849291739 | 4.648405857 |             | 944            |  |
| 4.175200669                                     | 3.721015328                                          | 2.875224539      | 2.931926984 |             |             |                |  |
| ENSG00000237596                                 | 43.54804637                                          | 31.85982551      | 11.6249165  |             |             |                |  |
| 109.8126605                                     | 103.8757564                                          | 68.14848458      | 29.01092946 |             |             |                |  |
| 93.9456338                                      | -1.683225787                                         | 0.002613154      | 0.026839281 |             |             |                |  |
| AL138828.1                                      | 6                                                    | 135991936        | 136225751   | -           | 6585        |                |  |
|                                                 | antisense                                            | novel transcript |             | -           | 48          | 36             |  |
| 10                                              | 106                                                  | 91               | 79          | 0.356955552 | 0.259043776 |                |  |
|                                                 | 0.094482433                                          | 0.894462483      | 0.849440519 | 0.557830595 |             |                |  |
| ENSG00000119927                                 | 790.2155914                                          | 667.2863455      | 691.6825317 |             |             |                |  |
| 475.5095392                                     | 444.0403212                                          | 527.0724567      | 716.3948228 |             |             |                |  |
| 482.207439                                      | 0.570358853                                          | 0.002614285      | 0.026839281 |             |             | GPAM           |  |
| 10                                              | 112149864                                            | 112215377        | -           | 9808        |             |                |  |
| protein_coding                                  | "glycerol-3-phosphate acyltransferase, mitochondrial |                  |             |             |             |                |  |
| [Source:HGNC                                    | Symbol;Acc:HGNC:24865]"                              |                  |             |             |             |                |  |
| 459                                             | 389                                                  | 611              | 4.348769422 | 3.642649035 |             | 595            |  |
| 3.774360297                                     | 2.600424637                                          | 2.437903463      | 2.896621642 |             |             |                |  |
| ENSG00000213614                                 | 469.0487494                                          | 578.7868301      | 652.1578156 |             |             |                |  |
| 225.8411319                                     | 327.6081547                                          | 431.3195226      | 566.664465  |             |             |                |  |
| 328.2562697                                     | 0.785389146                                          | 0.002618415      | 0.02685514  |             |             | HEXA           |  |
| 15                                              | 72340919                                             | 72376476         | -           | 12611       |             |                |  |
| protein_coding                                  | hexosaminidase subunit alpha [Source:HGNC            |                  |             |             |             |                |  |
| Symbol;Acc:HGNC:4878]                           | -                                                    | 517              | 654         | 561         | 218         | 287            |  |

|                                                                        |                                                      |               |                      |        |
|------------------------------------------------------------------------|------------------------------------------------------|---------------|----------------------|--------|
| 500                                                                    | 2.007565395                                          | 2.457280099   | 2.767707446          |        |
| 0.960547866                                                            | 1.398877649                                          | 1.843535465   |                      |        |
| ENSG00000145868                                                        | 951.7062633                                          | 793.8406523   | 899.768537           |        |
| 1259.73769                                                             | 1272.763388                                          | 1162.837433   | 881.7718176          |        |
| 1231.779504                                                            | -0.482202178                                         | 0.002618866   | 0.02685514           | FBX038 |
| 5                                                                      | 148383935                                            | 148442836     | + 8722               |        |
| protein_coding                                                         | F-box protein 38 [Source:HGNC Symbol;Acc:HGNC:28844] |               |                      |        |
| -                                                                      | 1049 897                                             | 774 1216      | 1115 1348            |        |
| 5.889631046                                                            | 4.873071701                                          | 5.521177697   | 7.746928296          |        |
| 7.857893624                                                            | 7.186291472                                          |               |                      |        |
| ENSG00000061273                                                        | 1706.539067                                          | 1763.79534    | 1729.787575          |        |
| 1111.594195                                                            | 1389.195555                                          | 1296.546485   | 1733.373994          |        |
| 1265.778745                                                            | 0.453710778                                          | 0.002627896   | 0.026924997          | HDAC7  |
| 12                                                                     | 47782722                                             | 47833132      | - 9928               |        |
| protein_coding                                                         | histone deacetylase 7 [Source:HGNC                   |               |                      |        |
| Symbol;Acc:HGNC:14067]                                                 | -                                                    | 1881 1993     | 1488 1073            | 1217   |
| 1503                                                                   | 9.278028679                                          | 9.512002835   | 9.324982154          |        |
| 6.00551142                                                             | 7.534877047                                          | 7.039279835   |                      |        |
| ENSG00000261620                                                        | 9.07250966                                           | 17.69990306   | 8.137441549          | 0      |
| 0                                                                      | 0                                                    | 11.63661809 0 | 5.97561647           |        |
| 0.002628722                                                            | 0.026924997                                          | HMG2P41       | 16 35802869          |        |
| 35803280                                                               | -                                                    | 412           | processed_pseudogene | high   |
| mobility group nucleosomal binding domain 2 pseudogene 41 [Source:HGNC |                                                      |               |                      |        |
| Symbol;Acc:HGNC:39412]                                                 | -                                                    | 10 20         | 7 0                  | 0      |
| 0                                                                      | 1.188588345                                          | 2.300166216   | 1.057079549          | 0      |
| 0                                                                      | 0                                                    |               |                      |        |
| ENSG00000100258                                                        | 1660.269268                                          | 2008.938998   | 2162.234469          |        |
| 1423.420712                                                            | 1506.769213                                          | 1245.650781   | 1943.814245          |        |
| 1391.946902                                                            | 0.481911933                                          | 0.002634188   | 0.026954646          | LMF2   |
| 22                                                                     | 50502949                                             | 50507691      | - 3054               |        |
| protein_coding                                                         | lipase maturation factor 2 [Source:HGNC              |               |                      |        |
| Symbol;Acc:HGNC:25096]                                                 | -                                                    | 1830 2270     | 1860 1374            | 1320   |
| 1444                                                                   | 29.34342072                                          | 35.21950642   | 37.89228177          |        |
| 24.9994091                                                             | 26.56759601                                          | 21.98513712   |                      |        |
| ENSG00000091651                                                        | 885.4769428                                          | 861.100284    | 720.7448229          |        |
| 636.0846559                                                            | 452.030764                                           | 542.5999595   | 822.4406832          |        |
| 543.5717931                                                            | 0.597584708                                          | 0.002634665   | 0.026954646          | ORC6   |
| 16                                                                     | 46689643                                             | 46698394      | + 4309               |        |
| protein_coding                                                         | origin recognition complex subunit 6 [Source:HGNC    |               |                      |        |
| Symbol;Acc:HGNC:17151]                                                 | -                                                    | 976 973       | 620 614              | 396    |
| 629                                                                    | 11.09179941                                          | 10.69948285   | 8.952040576          |        |
| 7.917788938                                                            | 5.648928165                                          | 6.787426965   |                      |        |
| ENSG00000251562                                                        | 2751.69218                                           | 2607.195721   | 1553.088844          |        |
| 3502.609481                                                            | 3239.553808                                          | 3524.743139   | 2303.992248          |        |
| 3422.302143                                                            | -0.570199909                                         | 0.002637606   | 0.02696914           | MALAT1 |
| 11                                                                     | 65497688                                             | 65506516      | + 8829               |        |
| lincRNA metastasis associated lung adenocarcinoma transcript 1         |                                                      |               |                      |        |
| [Source:HGNC Symbol;Acc:HGNC:29665]                                    | -                                                    |               | 3033 2946            | 1336   |
| 3381                                                                   | 2838 4086                                            | 16.82246282   | 15.81057507          |        |
| 9.41459816                                                             | 21.27872969                                          | 19.758239     | 21.51879081          |        |

|                                                           |              |             |              |                              |        |
|-----------------------------------------------------------|--------------|-------------|--------------|------------------------------|--------|
| ENSG00000231638                                           | 4.53625483   | 35.39980612 | 1.16249165   | 0                            |        |
| 0                                                         | 0            | 13.69951753 | 0            | 6.213574302                  |        |
| 0.002640599                                               | 0.026972264  | LUARIS      | 7            | 43508728                     |        |
| 43522542                                                  | -            | 2916        | antisense    | lncRNA upregulator of        |        |
| antiviral response interferon signaling [Source:HGNC      |              |             |              |                              |        |
| Symbol;Acc:HGNC:40992]                                    | -            | 5           | 40           | 1                            | 0      |
| 0                                                         | 0.083967489  | 0.649978382 | 0.021336311  | 0                            | 0      |
| 0                                                         | 0            |             |              |                              |        |
| ENSG00000146223                                           | 7770.604524  | 8092.39568  | 7498.071142  |                              |        |
| 9760.895159                                               | 9574.833455  | 10324.06409 | 7787.023782  |                              |        |
| 9886.597569                                               | -0.344391425 | 0.002640961 | 0.026972264  |                              | RPL7L1 |
| 6                                                         | 42879618     | 42889925    | +            | 7809                         |        |
| protein_coding ribosomal protein L7 like 1 [Source:HGNC   |              |             |              |                              |        |
| Symbol;Acc:HGNC:21370]                                    | -            | 8565        | 9144         | 6450                         | 9422   |
| 11968                                                     | 53.71067719  | 55.48393259 | 51.38911499  |                              | 8388   |
| 67.04396964                                               | 66.02529635  | 71.26186364 |              |                              |        |
| ENSG00000244045                                           | 265.824533   | 346.0331049 | 366.1848697  |                              |        |
| 485.8692241                                               | 619.8300627  | 473.5888359 | 326.0141692  |                              |        |
| 526.4293742                                               | -0.691565647 | 0.002654176 | 0.027085259  |                              |        |
| TMEM199                                                   | 17           | 28357581    | 28363683     | +                            | 4620   |
| protein_coding transmembrane protein 199 [Source:HGNC     |              |             |              |                              |        |
| Symbol;Acc:HGNC:18085]                                    | -            | 293         | 391          | 315                          | 469    |
| 549                                                       | 3.105663002  | 4.010155586 | 4.2420465    |                              | 543    |
| 5.640828693                                               | 7.224457062  | 5.525370276 |              |                              |        |
| ENSG00000198952                                           | 4449.158737  | 4694.014292 | 4197.757348  |                              |        |
| 5199.525876                                               | 6091.000395  | 6180.808759 | 4446.976792  |                              |        |
| 5823.778343                                               | -0.389031843 | 0.002655087 | 0.027085259  |                              | SMG5   |
| 1                                                         | 156249224    | 156282825   | -            | 5304                         |        |
| protein_coding "SMG5, nonsense mediated mRNA decay factor |              |             |              |                              |        |
| [Source:HGNC Symbol;Acc:HGNC:24644]"                      | -            | 4904        | 5304         |                              | 3611   |
| 5019                                                      | 5336         | 7165        | 45.27679007  | 47.38342406                  |        |
| 42.35754878                                               | 52.58062256  | 61.83860241 | 62.81215554  |                              |        |
| ENSG00000133247                                           | 167.8414287  | 242.488672  | 196.4610888  |                              |        |
| 69.40988916                                               | 66.20652603  | 138.0222472 | 202.2637298  |                              |        |
| 91.21288748                                               | 1.143426855  | 0.002675994 | 0.027270205  |                              | KMT5C  |
| 19                                                        | 55339853     | 55348120    | +            | 4775                         |        |
| protein_coding lysine methyltransferase 5C [Source:HGNC   |              |             |              |                              |        |
| Symbol;Acc:HGNC:28405]                                    | -            | 185         | 274          | 169                          | 67     |
| 160                                                       | 1.89726081   | 2.718965066 | 2.202014504  |                              | 58     |
| 0.779674751                                               | 0.746624055  | 1.55803649  |              |                              |        |
| ENSG00000285644                                           | 0            | 0           | 6.215810969  | 10.27342645                  |        |
| 18.11541995                                               | 0            | 11.53488579 | -6.006144273 |                              |        |
| 0.0026763                                                 | 0.027270205  | AC108448.3  | 11           | 3057538                      |        |
| 3064707                                                   | +            | 2507        | antisense    | "novel transcript, antisense |        |
| to CARS"                                                  | -            | 0           | 0            | 0                            | 6      |
| 0                                                         | 0            | 0           | 0.13298693   | 0.220666057                  | 21     |
| 0.389489701                                               |              |             |              |                              |        |
| ENSG00000109805                                           | 2319.84072   | 1778.840258 | 2297.0835    |                              |        |
| 1251.449942                                               | 497.6904371  | 392.5007656 | 2131.921493  |                              |        |
| 713.8803815                                               | 1.578527257  | 0.00267921  | 0.027284136  |                              | NCAPG  |

|                                                         |                                                        |             |             |             |             |
|---------------------------------------------------------|--------------------------------------------------------|-------------|-------------|-------------|-------------|
| 4                                                       | 17810902                                               | 17844862    | +           | 4921        |             |
| protein_coding                                          | non-SMC condensin I complex subunit G [Source:HGNC     |             |             |             |             |
| Symbol;Acc:HGNC:24304]                                  | -                                                      | 2557        | 2010        | 1976        | 1208 436    |
| 455                                                     | 25.44521041                                            | 19.35392854 |             | 24.98276034 |             |
| 13.6403531                                              | 5.446035707                                            | 4.299213866 |             |             |             |
| ENSG00000121774                                         | 6868.797063                                            | 6524.184269 |             | 8057.229625 |             |
| 5955.782877                                             | 5285.107164                                            | 4856.657825 |             | 7150.070319 |             |
| 5365.849289                                             | 0.41407942                                             | 0.002698372 |             | 0.027461867 |             |
| KHDRBS1 1                                               | 32013829                                               | 32060850    | +           | 3588        |             |
| protein_coding                                          | "KH RNA binding domain containing, signal transduction |             |             |             |             |
| associated 1 [Source:HGNC Symbol;Acc:HGNC:18116]"       | -                                                      |             |             | 7571        |             |
| 7372                                                    | 6931                                                   | 5749        | 4630        | 5630        | 103.3307295 |
| 97.35524028                                             | 120.185012                                             | 89.03318668 |             | 79.31876012 |             |
| 72.96036175                                             |                                                        |             |             |             |             |
| ENSG00000135723                                         | 2619.233539                                            | 2622.240639 |             | 2642.34352  |             |
| 2134.095099                                             | 1966.79042                                             | 1899.531178 |             | 2627.939233 |             |
| 2000.138899                                             | 0.393945267                                            | 0.002699768 |             | 0.027461867 | FHOD1       |
| 16                                                      | 67229387                                               | 67247658    | -           | 5407        |             |
| protein_coding                                          | formin homology 2 domain containing 1 [Source:HGNC     |             |             |             |             |
| Symbol;Acc:HGNC:17905]                                  | -                                                      | 2887        | 2963        | 2273        | 2060 1723   |
| 2202                                                    | 26.14683329                                            | 25.9658009  |             | 26.15471023 |             |
| 21.17009927                                             | 19.58737636                                            | 18.93616212 |             |             |             |
| ENSG0000012822                                          | 276.7115446                                            | 333.6431727 |             | 292.9478958 |             |
| 440.2866103                                             | 460.0212068                                            | 521.8966224 |             | 301.100871  |             |
| 474.0681465                                             | -0.655044599                                           | 0.002706912 |             | 0.027518712 |             |
| CALCOC01                                                | 12                                                     | 53708517    | 53727745    | -           | 8898        |
| protein_coding                                          | calcium binding and coiled-coil domain 1               |             |             |             |             |
| [Source:HGNC Symbol;Acc:HGNC:29306]                     | -                                                      |             | 305         | 377         | 252         |
| 425                                                     | 403                                                    | 605         | 1.678557108 | 2.007591691 |             |
| 1.762036847                                             | 2.654046773                                            | 2.783940858 |             | 3.161505862 |             |
| ENSG00000213073                                         | 34.47553671                                            | 35.39980612 |             | 22.08734135 |             |
| 66.30198367                                             | 126.7055929                                            | 77.63751407 |             | 30.65422806 |             |
| 90.21503023                                             | -1.549661698                                           | 0.002717099 |             | 0.027606408 |             |
| AL353625.1                                              | 6                                                      | 160093082   | 160096212   | +           | 3131        |
| transcribed_processed_pseudogene                        | calcineurin like EF-                                   |             |             |             |             |
| hand protein 1 pseudogene [Source:NCBI gene;Acc:729603] | -                                                      |             |             | 38          |             |
| 40                                                      | 19                                                     | 64          | 111         | 90          | 0.594332135 |
| 0.605345564                                             | 0.377552526                                            | 1.135818531 |             | 2.179150732 |             |
| 1.336566156                                             |                                                        |             |             |             |             |
| ENSG00000160285                                         | 3540.093269                                            | 3393.071417 |             | 3173.602204 |             |
| 2825.086086                                             | 2462.197873                                            | 1648.503216 |             | 3368.922297 |             |
| 2311.929058                                             | 0.543775924                                            | 0.002722648 |             | 0.027646908 | LSS         |
| 21                                                      | 46188141                                               | 46228824    | -           | 7238        |             |
| protein_coding                                          | lanosterol synthase [Source:HGNC Symbol;Acc:HGNC:6708] |             |             |             |             |
| -                                                       | 3902                                                   | 3834        | 2730        | 2727        | 2157 1911   |
| 26.39960141                                             | 25.09920528                                            | 23.46664021 |             | 20.93527176 |             |
| 18.31803677                                             | 12.27645925                                            |             |             |             |             |
| ENSG00000161091                                         | 1985.065114                                            | 2349.662132 |             | 2100.622411 |             |
| 2610.640607                                             | 2854.871062                                            | 3229.720586 |             | 2145.116552 |             |
| 2898.410752                                             | -0.434332632                                           | 0.002732973 |             | 0.027735837 | MFS12       |

|                                                                   |                        |             |             |                |                |           |
|-------------------------------------------------------------------|------------------------|-------------|-------------|----------------|----------------|-----------|
| 19                                                                | 3538261                | 3574290     | -           | 5277           | protein_coding | major     |
| facilitator superfamily domain containing 12                      | [Source:HGNC           |             |             |                |                |           |
| Symbol;Acc:HGNC:28299]                                            | -                      | 2188        | 2655        | 1807           | 2520           | 2501      |
| 3744                                                              | 20.3043414             | 23.83986941 |             | 21.30482175    |                |           |
| 26.53539093                                                       | 29.13224527            | 32.98980618 |             |                |                |           |
| ENSG00000198373                                                   | 1522.367121            | 1428.382177 |             | 1492.639278    |                |           |
| 2003.563069                                                       | 1902.866878            | 1988.382999 |             | 1481.129526    |                |           |
| 1964.937649                                                       | -0.407952008           | 0.002745949 |             | 0.027842799    |                | WWP2      |
| 16                                                                | 69762306               | 69941741    |             | +              | 9015           |           |
| protein_coding WW domain containing E3 ubiquitin protein ligase 2 | [Source:HGNC           |             |             |                |                |           |
| Symbol;Acc:HGNC:16804]                                            | -                      | 1678        | 1614        | 1284           |                |           |
| 1934                                                              | 1667                   | 2305        | 9.114962977 | 8.483288566    |                |           |
| 8.861477504                                                       | 11.9207281             | 11.36625065 |             | 11.88875061    |                |           |
| ENSG00000026508                                                   | 12051.92183            | 11204.92363 |             | 14059.17401    |                |           |
| 10334.82171                                                       | 9522.324831            | 7856.916424 |             | 12438.67316    |                |           |
| 9238.020987                                                       | 0.429186573            | 0.002746661 |             | 0.027842799    |                | CD44      |
| 11                                                                | 35138870               | 35232402    |             | +              | 10004          |           |
| protein_coding CD44 molecule (Indian blood group) [Source:HGNC    | Symbol;Acc:HGNC:1681]  |             |             |                |                |           |
| 9108                                                              | 65.02552502            | 59.96816593 |             | 75.21476931    |                | 8342      |
| 55.41084857                                                       | 51.25589988            | 42.33312773 |             |                |                |           |
| ENSG00000203923                                                   | 2.721752898            | 1.769990306 |             | 0              | 8.287747959    |           |
| 21.68834474                                                       | 37.95611799            | 1.497247735 |             | 22.64407023    |                |           |
| -3.871108117                                                      | 0.002770383            | 0.028067187 |             | SPANXN1 X      |                |           |
| 145246828                                                         | 145256112              | +           | 1276        | protein_coding |                |           |
| SPANX family member N1 [Source:HGNC                               | Symbol;Acc:HGNC:33174] |             |             |                |                |           |
| -                                                                 | 3                      | 2           | 0           | 8              | 19             | 44        |
| 0.115132852                                                       | 0.07426869             | 0           | 0.348378509 | 0.915272232    |                |           |
| 1.603367293                                                       |                        |             |             |                |                |           |
| ENSG00000113441                                                   | 1144.950719            | 894.7300998 |             | 960.2181028    |                |           |
| 833.9546384                                                       | 590.1512752            | 494.2921729 |             | 999.9663072    |                |           |
| 639.4660288                                                       | 0.645822739            | 0.002783224 |             | 0.028181142    |                | LNPEP     |
| 5                                                                 | 96935394               | 97037515    |             | +              | 15266          |           |
| protein_coding leucyl and cystinyl aminopeptidase [Source:HGNC    | Symbol;Acc:HGNC:6656]  |             |             |                |                |           |
| 573                                                               | 4.048207642            | 3.137995658 |             | 3.366368357    |                | 517       |
| 2.930101508                                                       | 2.081673652            | 1.745260992 |             |                |                |           |
| ENSG00000163536                                                   | 156.0471661            | 105.3144232 |             | 155.7738811    |                |           |
| 85.98538508                                                       | 42.23519764            | 35.36820086 |             | 139.0451568    |                |           |
| 54.52959453                                                       | 1.351782965            | 0.002790605 |             | 0.028239707    |                |           |
| SERPINI1                                                          | 3                      | 167735243   |             | 167825568      | +              | 2418      |
| protein_coding serpin family I member 1 [Source:HGNC              | Symbol;Acc:HGNC:8943]  |             |             |                |                |           |
| 41                                                                | 3.483379839            | 2.33193857  |             | 3.447905454    |                | 37        |
| 1.907365133                                                       | 0.940573606            | 0.788421717 |             |                |                |           |
| ENSG00000267317                                                   | 393.7469192            | 446.0375572 |             | 352.2349699    |                |           |
| 497.2648776                                                       | 624.39603              | 786.7268093 |             | 397.3398154    |                |           |
| 636.129239                                                        | -0.678821092           | 0.00279885  |             | 0.02830695     |                |           |
| AC027307.2                                                        | 19                     | 1457670     | 1458580     | -              | 911            | antisense |
| "novel transcript, antisense to APC2"                             |                        |             |             | -              | 434            | 504       |

|                        |                                                     |         |             |             |             |                |        |
|------------------------|-----------------------------------------------------|---------|-------------|-------------|-------------|----------------|--------|
|                        | 303                                                 | 480     | 547         | 912         | 23.32921019 | 26.21432022    |        |
|                        | 20.69336405                                         |         | 29.27756164 |             | 36.90764287 | 46.54869173    |        |
| ENSG00000111011        | 1040.616858                                         |         |             | 997.3895376 |             | 1109.017034    |        |
| 773.8684657            | 765.9410167                                         |         |             | 713.4024904 |             | 1049.00781     |        |
| 751.0706576            | 0.481984424                                         |         |             | 0.002809983 |             | 0.028403311    | RSRC2  |
| 12                     | 122503458                                           |         |             | 122527000   |             | - 8741         |        |
| protein_coding         | arginine and serine rich coiled-coil 2 [Source:HGNC |         |             |             |             |                |        |
| Symbol;Acc:HGNC:30559] | -                                                   |         |             | 1147        | 1127        | 954 747        | 671    |
| 827                    | 6.425855885                                         |         |             | 6.109268838 |             | 6.790380349    |        |
| 4.748664917            | 4.718552159                                         |         |             | 4.399217228 |             |                |        |
| ENSG00000115211        | 532.556317                                          |         |             | 659.3213891 |             | 678.8951235    |        |
| 775.9404027            | 1088.983204                                         |         |             | 942.0018374 |             | 623.5909432    |        |
| 935.6418147            | -0.585642574                                        |         |             | 0.002813889 |             | 0.028426551    | EIF2B4 |
| 2                      | 27364352                                            |         |             | 27370486    |             | - 5341         |        |
| protein_coding         | eukaryotic translation initiation factor 2B subunit |         |             |             |             |                |        |
| delta [Source:HGNC     | Symbol;Acc:HGNC:3260]                               |         |             |             |             |                |        |
| 584                    | 749                                                 | 954     | 1092        | 5.382006362 |             | 6.609371077    | 745    |
| 6.802947443            | 7.79240082                                          |         |             | 10.9792622  |             | 9.506728223    |        |
| ENSG00000058668        | 1662.08377                                          |         |             | 1342.537647 |             | 1793.724616    |        |
| 1257.665753            | 1095.832155                                         |         |             | 1026.540464 |             | 1599.448678    |        |
| 1126.679457            | 0.505250118                                         |         |             | 0.002818822 |             | 0.028460129    | ATP2B4 |
| 1                      | 203626561                                           |         |             | 203744081   |             | + 9721         |        |
| protein_coding         | ATPase plasma membrane Ca2+ transporting 4          |         |             |             |             |                |        |
| [Source:HGNC           | Symbol;Acc:HGNC:817]                                |         |             |             |             |                |        |
| 1214                   | 960                                                 | 1190    |             | 9.228756977 |             | 7.394368305    | 1543   |
| 9.875562219            | 6.939365894                                         |         |             | 6.07026499  |             | 5.692028113    |        |
| ENSG00000165661        | 1229.325059                                         |         |             | 1309.792827 |             | 1264.790915    |        |
| 977.9542592            | 792.1953288                                         |         |             | 952.353506  |             | 1267.9696      |        |
| 907.5010313            | 0.48196408                                          |         |             | 0.002824764 |             | 0.028503852    | QS0X2  |
| 9                      | 136206333                                           |         |             | 136245841   |             | - 4530         |        |
| protein_coding         | quiescin sulphydryl oxidase 2 [Source:HGNC          |         |             |             |             |                |        |
| Symbol;Acc:HGNC:30249] | -                                                   |         |             | 1355        | 1480        | 1088 944       | 694    |
| 1104                   | 14.64771147                                         |         |             | 15.48067717 |             | 14.94299117    |        |
| 11.57939412            | 9.416914529                                         |         |             | 11.33187798 |             |                |        |
| ENSG00000177602        | 469.0487494                                         |         |             | 400.0178092 |             | 474.2965932    |        |
| 314.9344225            | 223.7323983                                         |         |             | 286.396163  |             | 447.7877173    |        |
| 275.0209946            | 0.701645166                                         |         |             | 0.002830142 |             | 0.028541837    | HASPIN |
| 17                     | 3723903                                             | 3726699 | +           | 2797        |             | protein_coding |        |
| histone H3 associated  | protein kinase [Source:HGNC                         |         |             |             |             |                |        |
| Symbol;Acc:HGNC:19682] | -                                                   |         |             | 517         | 452         | 408 304        | 196    |
| 332                    | 9.051629315                                         |         |             | 7.657242643 |             | 9.075583217    |        |
| 6.039391187            | 4.307357962                                         |         |             | 5.519206399 |             |                |        |
| ENSG00000160703        | 360.1786335                                         |         |             | 346.0331049 |             | 426.6344355    |        |
| 494.1569721            | 696.3100152                                         |         |             | 585.7319117 |             | 377.6153913    |        |
| 592.0662997            | -0.649633638                                        |         |             | 0.002832539 |             | 0.028549731    | NLRX1  |
| 11                     | 119166568                                           |         |             | 119184016   |             | + 5320         |        |
| protein_coding         | NLR family member X1 [Source:HGNC                   |         |             |             |             |                |        |
| Symbol;Acc:HGNC:29890] | -                                                   |         |             | 397         | 391         | 367 477        | 610    |
| 679                    | 3.654328273                                         |         |             | 3.482503535 |             | 4.292015469    |        |
| 4.982172846            | 7.047994604                                         |         |             | 5.934568678 |             |                |        |



|                                 |                                                       |             |                |        |
|---------------------------------|-------------------------------------------------------|-------------|----------------|--------|
| ENSG00000165572                 | 777.5140778                                           | 749.5908947 | 711.4448897    |        |
| 959.3068263                     | 1219.113272                                           | 1017.051434 | 746.1832874    |        |
| 1065.157178                     | -0.512613198                                          | 0.002839015 | 0.028598707    | KBTBD6 |
| 13                              | 41127569                                              | 41132746    | - 5178         |        |
| protein_coding                  | kelch repeat and BTB domain containing 6 [Source:HGNC |             |                |        |
| Symbol;Acc:HGNC:25340]          | -                                                     | 857 847     | 612 926        | 1068   |
| 1179                            | 8.104896241                                           | 7.750822745 | 7.353535996    |        |
| 9.937130293                     | 12.67816988                                           | 10.58724046 |                |        |
| ENSG00000177613                 | 956.2425181                                           | 1260.233098 | 1033.455077    |        |
| 1390.26972                      | 1464.534016                                           | 1817.580468 | 1083.310231    |        |
| 1557.461401                     | -0.523938555                                          | 0.002849718 | 0.02869019     | CSTF2T |
| 10                              | 51695487                                              | 51699591    | - 4105         |        |
| protein_coding                  | cleavage stimulation factor subunit 2 tau variant     |             |                |        |
| [Source:HGNC                    | Symbol;Acc:HGNC:17086]                                | -           | 1054 1424      | 889    |
| 1342                            | 1283 2107                                             | 12.57349846 | 16.437027      |        |
| 13.47396597                     | 18.16566906                                           | 19.21148142 | 23.86615145    |        |
| ENSG00000155959                 | 2469.537129                                           | 2223.107825 | 2583.056446    |        |
| 1995.275321                     | 1779.58576                                            | 1570.003062 | 2425.2338      |        |
| 1781.621381                     | 0.445048091                                           | 0.002868834 | 0.028865965    | VBP1   |
| X                               | 155197007                                             | 155239817   | + 2018         |        |
| protein_coding                  | VHL binding protein 1 [Source:HGNC                    |             |                |        |
| Symbol;Acc:HGNC:12662]          | -                                                     | 2722 2512   | 2222 1926      | 1559   |
| 1820                            | 66.05347077                                           | 58.98273599 | 68.5061781     |        |
| 53.03311837                     | 47.48673536                                           | 41.93544387 |                |        |
| ENSG00000162458                 | 849.1869042                                           | 935.4398768 | 1333.377922    |        |
| 638.1565929                     | 807.0347225                                           | 525.3471786 | 1039.334901    |        |
| 656.8461647                     | 0.662260948                                           | 0.002870441 | 0.028865965    | FBLIM1 |
| 1                               | 15756607                                              | 15786594    | + 4716         |        |
| protein_coding                  | filamin binding LIM protein 1 [Source:HGNC            |             |                |        |
| Symbol;Acc:HGNC:24686]          | -                                                     | 936 1057    | 1147 616       | 707    |
| 609                             | 9.719204852                                           | 10.62007617 | 15.13200472    |        |
| 7.25803335                      | 9.214949883                                           | 6.004467719 |                |        |
| ENSG00000011275                 | 3225.277184                                           | 3437.321175 | 3174.764696    |        |
| 3778.177101                     | 4371.913702                                           | 5062.828557 | 3279.121018    |        |
| 4404.306453                     | -0.425713498                                          | 0.002873451 | 0.028879814    | RNF216 |
| 7                               | 5620047 5781739                                       | - 7619      | protein_coding | ring   |
| finger protein 216 [Source:HGNC | Symbol;Acc:HGNC:21698]                                | -           |                | 3555   |
| 3884                            | 2731 3647                                             | 3830 5869   | 22.84916401    |        |
| 24.15503597                     | 22.30132019                                           | 26.59805216 | 30.89926583    |        |
| 35.81765542                     |                                                       |             |                |        |
| ENSG00000166848                 | 2052.201685                                           | 2462.056516 | 2234.308951    |        |
| 2588.885269                     | 3174.488774                                           | 3526.468417 | 2249.522384    |        |
| 3096.614153                     | -0.461219012                                          | 0.002923614 | 0.0293673      |        |
| TERF2IP 16                      | 75647786                                              | 75761872    | + 3379         |        |
| protein_coding                  | TERF2 interacting protein [Source:HGNC                |             |                |        |
| Symbol;Acc:HGNC:19246]          | -                                                     | 2262 2782   | 1922 2499      | 2781   |
| 4088                            | 32.78182234                                           | 39.01174481 | 35.38930536    |        |
| 41.09510628                     | 50.58947323                                           | 56.25403946 |                |        |
| ENSG00000144161                 | 299.3928188                                           | 421.2576929 | 239.4732799    |        |
| 591.5380106                     | 450.8892721                                           | 576.2428822 | 320.0412638    |        |

|                                     |                                                     |             |             |        |
|-------------------------------------|-----------------------------------------------------|-------------|-------------|--------|
| 539.5567217                         | -0.751807382                                        | 0.002942247 | 0.029530124 | ZC3H8  |
| 2                                   | 112211525                                           | 112255136   | - 6600      |        |
| protein_coding                      | zinc finger CCCH-type containing 8 [Source:HGNC     |             |             |        |
| Symbol;Acc:HGNC:30941]              | -                                                   | 330 476     | 206 571     | 395    |
| 668                                 | 2.448491992                                         | 3.417349977 | 1.94191462  |        |
| 4.80733311                          | 3.678752077                                         | 4.70612594  |             |        |
| ENSG00000183496                     | 277.6187956                                         | 198.2389143 | 315.0352371 |        |
| 125.3521879                         | 140.4034949                                         | 158.7255843 | 263.6309823 |        |
| 141.4937557                         | 0.895075014                                         | 0.002943163 | 0.029530124 | MEX3B  |
| 15                                  | 82041778                                            | 82046141    | - 4364      |        |
| protein_coding                      | mex-3 RNA binding family member B [Source:HGNC      |             |             |        |
| Symbol;Acc:HGNC:25297]              | -                                                   | 306 224     | 271 121     | 123    |
| 184                                 | 3.433723875                                         | 2.432146423 | 3.863593223 |        |
| 1.540680806                         | 1.732478005                                         | 1.960487598 |             |        |
| ENSG00000185480                     | 499.8952823                                         | 386.7428819 | 423.1469606 |        |
| 338.7616978                         | 220.3079228                                         | 137.1596082 | 436.5950416 |        |
| 232.0764096                         | 0.913769486                                         | 0.002945162 | 0.029533434 | PARPBP |
| 12                                  | 102120185                                           | 102197520   | + 4745      |        |
| protein_coding                      | PARP1 binding protein [Source:HGNC                  |             |             |        |
| Symbol;Acc:HGNC:26074]              | -                                                   | 551 437     | 364 327     | 193    |
| 159                                 | 5.686487196                                         | 4.363868559 | 4.772786565 |        |
| 3.829336925                         | 2.500163741                                         | 1.558087795 |             |        |
| ENSG00000137154                     | 18382.71907                                         | 24532.06564 | 24451.84936 |        |
| 27781.56713                         | 32629.54391                                         | 29660.11829 | 22455.54469 |        |
| 30023.74311                         | -0.41905051                                         | 0.002949    | 0.029555157 | RPS6   |
| 9                                   | 19375715                                            | 19380254    | - 2714      |        |
| protein_coding                      | ribosomal protein S6 [Source:HGNC                   |             |             |        |
| Symbol;Acc:HGNC:10429]              | -                                                   | 20262 27720 | 21034 26817 | 28585  |
| 34383                               | 365.5957607                                         | 483.960396  | 482.1907477 |        |
| 549.0506276                         | 647.4044995                                         | 589.0673366 |             |        |
| ENSG00000147614                     | 19.95952125                                         | 11.50493699 | 15.11239145 |        |
| 44.54664528                         | 77.62144432                                         | 50.89570367 | 15.52561656 |        |
| 57.68793109                         | -1.891794455                                        | 0.002966724 | 0.02971596  |        |
| ATP6V0D2                            | 8 85987323                                          | 86154228    | + 3010      |        |
| protein_coding                      | ATPase H+ transporting V0 subunit d2                |             |             |        |
| [Source:HGNC Symbol;Acc:HGNC:18266] | -                                                   | 22 13       | 13          |        |
| 43                                  | 68 59                                               | 0.357919095 | 0.204646018 |        |
| 0.268709922                         | 0.793805317                                         | 1.38864034  | 0.91141576  |        |
| ENSG00000132196                     | 408.2629347                                         | 382.3179061 | 373.1598196 |        |
| 284.8913361                         | 149.5354295                                         | 225.1487908 | 387.9135535 |        |
| 219.8585188                         | 0.81790191                                          | 0.002970705 | 0.029738989 |        |
| HSD17B7 1                           | 162790702                                           | 162812817   | + 4778      |        |
| protein_coding                      | hydroxysteroid 17-beta dehydrogenase 7 [Source:HGNC |             |             |        |
| Symbol;Acc:HGNC:5215]               | -                                                   | 450 432     | 321 275     | 131    |
| 261                                 | 4.612061098                                         | 4.284143824 | 4.179898477 |        |
| 3.198148254                         | 1.685281721                                         | 2.539951244 |             |        |
| ENSG00000121440                     | 360.1786335                                         | 303.5533375 | 387.1097194 |        |
| 108.776692                          | 197.4780863                                         | 245.8521279 | 350.2805635 |        |
| 184.0356354                         | 0.926062297                                         | 0.002976197 | 0.029777122 | PDZRN3 |
| 3                                   | 73382433                                            | 73624940    | - 6136      |        |

|                                      |                                                  |             |             |          |      |        |
|--------------------------------------|--------------------------------------------------|-------------|-------------|----------|------|--------|
| protein_coding                       | PDZ domain containing ring finger 3 [Source:HGNC |             |             |          |      |        |
| Symbol;Acc:HGNC:17704]               | -                                                | 397         | 343         | 333      | 105  | 173    |
| 285                                  | 3.168355022                                      | 2.648714871 | 3.376492032 |          |      |        |
| 0.950858716                          | 1.733038107                                      | 2.159685573 |             |          |      |        |
| ENSG00000156869                      | 221.3692357                                      | 158.4141324 | 229.010855  |          |      |        |
| 100.488944                           | 125.5641011                                      | 56.93417699 | 202.9314077 |          |      |        |
| 94.32907403                          | 1.109451913                                      | 0.002985083 | 0.029849145 |          |      | FRRS1  |
| 1                                    | 99708632                                         | 99766631    | -           | 3958     |      |        |
| protein_coding                       | ferric chelate reductase 1 [Source:HGNC          |             |             |          |      |        |
| Symbol;Acc:HGNC:27622]               | -                                                | 244         | 179         | 197      | 97   | 110    |
| 66                                   | 3.018858241                                      | 2.142908769 | 3.0966868   |          |      |        |
| 1.36178325                           | 1.708300451                                      | 0.77535245  |             |          |      |        |
| ENSG00000246575                      | 3.629003864                                      | 2.654985459 | 4.6499666   |          |      |        |
| 16.57549592                          | 18.26386925                                      | 51.75834272 | 3.644651974 |          |      |        |
| 28.86590263                          | -3.001881567                                     | 0.002990698 | 0.029888394 |          |      |        |
| AC093162.2                           | 2                                                | 85315041    | 85316529    | +        |      | 704    |
| unprocessed_pseudogene               | "retinol saturase (all-trans-retinol             |             |             |          |      |        |
| 13,14-reductase) (RESAT) pseudogene" | -                                                | 4           | 3           |          |      | 4      |
| 16                                   | 16                                               | 60          | 0.278237726 | 0.201918 |      |        |
| 0.353503875                          | 1.262872096                                      | 1.39699446  | 3.962868026 |          |      |        |
| ENSG00000120686                      | 2374.275778                                      | 2402.761841 | 2540.044255 |          |      |        |
| 3025.028005                          | 3239.553808                                      | 3231.445864 | 2439.027291 |          |      |        |
| 3165.342559                          | -0.376255584                                     | 0.00299667  | 0.02993117  |          |      | UFM1   |
| 13                                   | 38349849                                         | 38363619    | +           | 4382     |      |        |
| protein_coding                       | ubiquitin fold modifier 1 [Source:HGNC           |             |             |          |      |        |
| Symbol;Acc:HGNC:20597]               | -                                                | 2617        | 2715        | 2185     | 2920 | 2838   |
| 3746                                 | 29.24556614                                      | 29.35782663 | 31.02315157 |          |      |        |
| 37.02734067                          | 39.80956005                                      | 39.74901929 |             |          |      |        |
| ENSG00000168710                      | 5131.411464                                      | 4156.822234 | 4918.502171 |          |      |        |
| 3559.587748                          | 3905.043544                                      | 3108.08848  | 4735.578623 |          |      |        |
| 3524.239924                          | 0.426434117                                      | 0.003000034 | 0.0299373   |          |      | AHCYL1 |
| 1                                    | 109984686                                        | 110023741   | +           | 5113     |      |        |
| protein_coding                       | adenosylhomocysteine like 1 [Source:HGNC         |             |             |          |      |        |
| Symbol;Acc:HGNC:344]                 | -                                                | 5656        | 4697        | 4231     | 3436 | 3421   |
| 3603                                 | 54.17043108                                      | 43.52825011 | 51.4842131  |          |      |        |
| 37.34129765                          | 41.12677372                                      | 32.76570279 |             |          |      |        |
| ENSG00000166250                      | 4369.320652                                      | 4517.900257 | 4894.089846 |          |      |        |
| 5968.214499                          | 6046.482214                                      | 5652.873664 | 4593.770252 |          |      |        |
| 5889.190126                          | -0.358483648                                     | 0.003000669 | 0.0299373   |          |      | CLMP   |
| 11                                   | 123069865                                        | 123195281   | -           | 5097     |      |        |
| protein_coding                       | CXADR like membrane protein [Source:HGNC         |             |             |          |      |        |
| Symbol;Acc:HGNC:24039]               | -                                                | 4816        | 5105        | 4210     | 5761 | 5297   |
| 6553                                 | 46.2701096                                       | 47.45779474 | 51.38949014 |          |      |        |
| 62.80515406                          | 63.87967524                                      | 59.78008834 |             |          |      |        |
| ENSG00000185250                      | 25.40302705                                      | 28.3198449  | 44.1746827  |          |      |        |
| 91.16522755                          | 86.75337894                                      | 88.85182166 | 32.63251821 |          |      |        |
| 88.92347605                          | -1.453802845                                     | 0.003006112 | 0.029974699 |          |      | PPIL6  |
| 6                                    | 109390215                                        | 109441171   | -           | 4481     |      |        |
| protein_coding                       | peptidylprolyl isomerase like 6 [Source:HGNC     |             |             |          |      |        |
| Symbol;Acc:HGNC:21557]               | -                                                | 28          | 32          | 38       | 88   | 76     |

|                                                                  |              |             |                |                |
|------------------------------------------------------------------|--------------|-------------|----------------|----------------|
| 103                                                              | 0.305993197  | 0.338377498 | 0.527613014    |                |
| 1.091238731                                                      | 1.042523873  | 1.068792257 |                |                |
| ENSG00000177370                                                  | 677.7164716  | 885.8801483 | 671.9201736    |                |
| 927.1918029                                                      | 1167.74614   | 1205.969385 | 745.1722645    |                |
| 1100.302443                                                      | -0.561706452 | 0.003009292 | 0.029989499    | TIMM22         |
| 17                                                               | 997117       | 1003671 +   | 3194           | protein_coding |
| translocase of inner mitochondrial membrane 22 [Source:HGNC      |              |             |                |                |
| Symbol;Acc:HGNC:17317] -                                         |              |             |                |                |
|                                                                  |              | 747         | 1001           | 578 895 1023   |
| 1398                                                             | 11.45287112  | 14.84997103 | 11.25899881    |                |
| 15.57041425                                                      | 19.68738717  | 20.35182116 |                |                |
| ENSG00000138944                                                  | 1395.351986  | 1128.36882  | 1000.905311    |                |
| 787.3360561                                                      | 696.3100152  | 910.9468318 | 1174.875372    |                |
| 798.1976344                                                      | 0.557394442  | 0.003013795 | 0.030017467    |                |
| SHISAL1 22                                                       | 44243667     | 44312851    | -              | 6751           |
| protein_coding shisa like 1 [Source:HGNC Symbol;Acc:HGNC:29335]  |              |             |                |                |
| -                                                                | 1538         | 1275        | 861            | 760 610 1056   |
| 11.15621592                                                      | 8.948876562  | 7.934907896 | 6.255435176    |                |
| 5.554041075                                                      | 7.273221743  |             |                |                |
| ENSG00000119705                                                  | 938.0974988  | 1046.064271 | 1028.80511     |                |
| 735.5376314                                                      | 578.7363569  | 766.8861113 | 1004.322293    |                |
| 693.7200332                                                      | 0.532632761  | 0.003016841 | 0.030030893    | SLIRP          |
| 14                                                               | 77708071     | 77761104    | +              | 2631           |
| protein_coding SRA stem-loop interacting RNA binding protein     |              |             |                |                |
| [Source:HGNC Symbol;Acc:HGNC:20495] -                            |              |             |                |                |
|                                                                  |              |             | 1034           | 1182 885       |
| 710                                                              | 507          | 889         | 19.24546347    | 21.28742198    |
| 20.92807433                                                      | 14.99510614  | 11.84498381 | 15.71129311    |                |
| ENSG00000068784                                                  | 352.0133748  | 275.2334926 | 365.0223781    |                |
| 204.0857935                                                      | 207.7515127  | 169.0772529 | 330.7564152    |                |
| 193.6381864                                                      | 0.772972948  | 0.003024032 | 0.030085549    | SRBD1          |
| 2                                                                | 45388680     | 45612165    | -              | 5045           |
| protein_coding S1 RNA binding domain 1 [Source:HGNC              |              |             |                |                |
| Symbol;Acc:HGNC:25521] -                                         |              |             |                |                |
|                                                                  |              | 388         | 311            | 314 197 182    |
| 196                                                              | 3.766164094  | 2.920960333 | 3.872356422    |                |
| 2.169786982                                                      | 2.217469104  | 1.80644989  |                |                |
| ENSG00000143740                                                  | 1117.73319   | 1077.924097 | 1038.105043    |                |
| 1446.212019                                                      | 1445.128654  | 1466.486377 | 1077.920777    |                |
| 1452.609017                                                      | -0.430170321 | 0.003028788 | 0.030113017    | SNAP47         |
| 1                                                                | 227728539    | 227781231   | +              | 6580           |
| protein_coding synaptosome associated protein 47 [Source:HGNC    |              |             |                |                |
| Symbol;Acc:HGNC:30669] -                                         |              |             |                |                |
|                                                                  |              | 1232        | 1218           | 893 1396 1266  |
| 1700                                                             | 9.168821075  | 8.77097424  | 8.443692558    |                |
| 11.78885343                                                      | 11.82647103  | 12.01307106 |                |                |
| ENSG00000109943                                                  | 10.88701159  | 8.849951531 | 13.9498998     | 0              |
| 0                                                                | 0            | 11.22895431 | 0              | 5.920759172    |
| 0.003030198                                                      | 0.030113017  | CRTAM       | 11             | 122838500      |
| 122872639                                                        | +            | 2675        | protein_coding | cytotoxic and  |
| regulatory T cell molecule [Source:HGNC Symbol;Acc:HGNC:24313] - |              |             |                |                |
|                                                                  |              |             |                | 0 0.219677786  |
| 12                                                               | 10           | 12          | 0              | 0              |
| 0.177134296                                                      | 0.279102873  | 0           | 0              | 0              |
| ENSG00000276023                                                  | 958.0570201  | 1021.284407 | 991.6053774    |                |

|                        |                                         |              |                         |             |
|------------------------|-----------------------------------------|--------------|-------------------------|-------------|
| 1532.197404            | 1284.178307                             | 1286.194817  | 990.3156014             |             |
| 1367.523509            | -0.465516218                            | 0.003033832  | 0.030132208             | DUSP14      |
| 17                     | 37489831                                | 37513501     | + 2499                  |             |
| protein_coding         | dual specificity phosphatase 14         | [Source:HGNC |                         |             |
| Symbol;Acc:HGNC:17007] | -                                       | 1056 1154    | 853 1479                | 1125        |
| 1491                   | 20.6931376                              | 21.88094092  | 21.23682663             |             |
| 32.88622028            | 27.67155892                             | 27.74229627  |                         |             |
| ENSG00000165476        | 1750.087113                             | 1583.256329  | 1708.862725             |             |
| 1426.528617            | 1142.63332                              | 957.5293403  | 1680.735389             |             |
| 1175.563759            | 0.516212861                             | 0.003037648  | 0.030153179             | REEP3       |
| 10                     | 63521363                                | 63625123     | + 5248                  |             |
| protein_coding         | receptor accessory protein 3            | [Source:HGNC |                         |             |
| Symbol;Acc:HGNC:23711] | -                                       | 1929 1789    | 1470 1377               | 1001        |
| 1110                   | 17.99977535                             | 16.15261921  | 17.42730994             |             |
| 14.57981984            | 11.72431859                             | 9.834678576  |                         |             |
| ENSG00000166685        | 684.9744793                             | 791.1856669  | 806.769205              |             |
| 1014.213157            | 1280.753831                             | 996.3480973  | 760.9764504             |             |
| 1097.105028            | -0.527523171                            | 0.003043466  | 0.030193982             | COG1        |
| 17                     | 73192632                                | 73208507     | + 5317                  |             |
| protein_coding         | component of oligomeric golgi complex 1 | [Source:HGNC |                         |             |
| Symbol;Acc:HGNC:6545]  | -                                       | 755 894      | 694 979                 | 1122        |
| 1155                   | 6.953588315                             | 7.967045534  | 8.120815744             |             |
| 10.23123536            | 12.97100291                             | 10.10058068  |                         |             |
| ENSG00000114648        | 1064.205383                             | 1110.668917  | 1035.78006              |             |
| 1410.98909             | 1320.706045                             | 1791.701297  | 1070.21812              |             |
| 1507.798811            | -0.495068933                            | 0.003047295  | 0.030215018             | KLHL18      |
| 3                      | 47282917                                | 47346816     | + 7064                  |             |
| protein_coding         | kelch like family member 18             | [Source:HGNC |                         |             |
| Symbol;Acc:HGNC:29120] | -                                       | 1173 1255    | 891 1362                | 1157        |
| 2077                   | 8.131599961                             | 8.418204585  | 7.847545819             |             |
| 10.71367482            | 10.0676945                              | 13.67152069  |                         |             |
| ENSG00000267414        | 4.53625483                              | 23.89486913  | 6.974949899             | 0           |
| 0                      | 0                                       | 11.80202462  | 0                       | 5.996636775 |
| 0.003054731            | 0.030271784                             | AC120049.1   | 18                      | 44676927    |
| 44679717               | -                                       | 2065         | lincRNA uncharacterized |             |
| LOC101927943           | [Source:NCBI gene;Acc:101927943]        | -            | 5                       | 27          |
| 6                      | 0                                       | 0            | 0                       | 0.118571041 |
| 0.180774863            | 0                                       | 0            | 0                       | 0.619541138 |
| ENSG00000142541        | 37269.86968                             | 43445.29706  | 44403.69355             |             |
| 49983.40794            | 52305.43855                             | 60407.16178  | 41706.28677             |             |
| 54232.00276            | -0.378912583                            | 0.003058393  | 0.030291103             | RPL13A      |
| 19                     | 49487554                                | 49492308     | + 2369                  |             |
| protein_coding         | ribosomal protein L13a                  | [Source:HGNC |                         |             |
| Symbol;Acc:HGNC:10304] | -                                       | 41080 49091  | 38197 48248             | 45822       |
| 70026                  | 849.1688562                             | 981.8909541  | 1003.161926             |             |
| 1131.686925            | 1188.93015                              | 1374.438389  |                         |             |
| ENSG00000108946        | 4497.243038                             | 4187.797065  | 5390.473781             |             |
| 3733.630456            | 3674.462195                             | 2756.994389  | 4691.837961             |             |
| 3388.362346            | 0.469658332                             | 0.003064526  | 0.030334858             |             |
| PRKAR1A 17             | 68511780                                | 68551319     | + 6821                  |             |

|                                                  |                                                                                                        |                          |                          |
|--------------------------------------------------|--------------------------------------------------------------------------------------------------------|--------------------------|--------------------------|
| protein_coding                                   | protein kinase cAMP-dependent type I regulatory subunit alpha [Source:HGNC Symbol;Acc:HGNC:9388]       | -                        | 4957                     |
| 4732                                             | 4637 3604                                                                                              | 3219 3196                | 35.58766985              |
| 32.87177285                                      | 42.29566844                                                                                            | 29.3595082               | 29.00816702              |
| 21.78661401                                      |                                                                                                        |                          |                          |
| ENSG00000217165                                  | 108.8701159                                                                                            | 126.5543069              | 88.34936539              |
| 198.905951                                       | 234.0058248                                                                                            | 190.643229               | 107.9245961              |
| 207.8516683                                      | -0.941688131                                                                                           | 0.003070503              | 0.030377025              |
| ANKRD18EP                                        | 6 39110321                                                                                             | 39112952                 | + 2632                   |
|                                                  | processed_pseudogene "ankyrin repeat domain 18E, pseudogene [Source:HGNC Symbol;Acc:HGNC:43609]"       | -                        | 120 143 76               |
| 192                                              | 205 221                                                                                                | 2.23266747               | 2.574403359              |
| 1.796530331                                      | 4.05347396                                                                                             | 4.787572198              | 3.904248093              |
| ENSG00000152475                                  | 59.87856375                                                                                            | 133.6342681              | 98.81179024              |
| 165.7549592                                      | 205.4685291                                                                                            | 257.0664355              | 97.44154071              |
| 209.4299746                                      | -1.104603874                                                                                           | 0.003083681              | 0.030490345              |
| 19                                               | 58367618                                                                                               | 58381060                 | - 2076                   |
| protein_coding                                   | zinc finger protein 837 [Source:HGNC Symbol;Acc:HGNC:25164]                                            | zf-C2H2                  | 66 151 85 160 180        |
| 298                                              | 1.556844619                                                                                            | 3.446482193              | 2.5474075                |
| 4.282572039                                      | 5.329574239                                                                                            | 6.674518375              |                          |
| ENSG00000165646                                  | 12.70151352                                                                                            | 7.079961225              | 13.9498998 0             |
| 0                                                | 0 11.24379152                                                                                          | 0                        | 5.922607716              |
| 0.003097687                                      | 0.030611727                                                                                            | SLC18A2 10               | 117241073                |
| 117279430                                        | + 4145                                                                                                 | protein_coding           | solute carrier family    |
| 18 member A2 [Source:HGNC Symbol;Acc:HGNC:10935] | -                                                                                                      |                          | 14                       |
| 8                                                | 12 0                                                                                                   | 0 0                      | 0.165398735              |
| 0.091451723                                      | 0.180120672                                                                                            | 0 0                      | 0                        |
| ENSG00000228222                                  | 17.23776835                                                                                            | 14.15992245              | 3.48747495 0             |
| 0                                                | 0 11.62838858                                                                                          | 0                        | 5.976461345              |
| 0.003100824                                      | 0.030615006                                                                                            | AC073050.1               | 2 167293171              |
| 167558333                                        | + 462                                                                                                  | lincRNA novel transcript |                          |
| (hCG1660379)                                     | - 19                                                                                                   | 16 3                     | 0 0 0                    |
| 2.013911162                                      | 1.640984383                                                                                            | 0.404004429              | 0 0                      |
| 0                                                |                                                                                                        |                          |                          |
| ENSG00000075420                                  | 2198.269091                                                                                            | 2023.983915              | 2578.406479              |
| 1894.786377                                      | 1582.107674                                                                                            | 1289.645373              | 2266.886495              |
| 1588.846475                                      | 0.512813716                                                                                            | 0.003101481              | 0.030615006              |
| 3                                                | 172039628                                                                                              | 172401665                | + 13270                  |
| protein_coding                                   | fibronectin type III domain containing 3B [Source:HGNC Symbol;Acc:HGNC:24670]                          | -                        | 2423 2287 2218 1829 1386 |
| 1495                                             | 8.941516346                                                                                            | 8.16623141               | 10.39914097              |
| 7.658695912                                      | 6.420068585                                                                                            | 5.238431725              |                          |
| ENSG00000140941                                  | 3452.997177                                                                                            | 3713.439662              | 4343.068804              |
| 5459.553968                                      | 5048.818356                                                                                            | 4739.338915              | 3836.501881              |
| 5082.570413                                      | -0.40600627                                                                                            | 0.003111584              | 0.030697609              |
| MAP1LC3B                                         | 16 87383995                                                                                            | 87404779                 | + 5313                   |
|                                                  | protein_coding microtubule associated protein 1 light chain 3 beta [Source:HGNC Symbol;Acc:HGNC:13352] | -                        | 3806 4196                |
| 3736                                             | 5270 4423                                                                                              | 5494 35.07984385         | 37.42157864              |

|                                                      |                                                        |             |                        |                    |                |
|------------------------------------------------------|--------------------------------------------------------|-------------|------------------------|--------------------|----------------|
|                                                      | 43.74958102                                            | 55.11665377 | 51.17106828            | 48.08170475        |                |
| ENSG0000033100                                       | 1305.53414                                             | 1733.705505 | 1554.251336            |                    |                |
| 1702.096237                                          | 2321.794379                                            | 2706.961324 | 1531.16366             |                    |                |
| 2243.617313                                          | -0.551485478                                           | 0.003117038 | 0.030734277            |                    | CHPF2          |
| 7                                                    | 151232489                                              | 151238827   | +                      | 4205               |                |
| protein_coding                                       | chondroitin polymerizing factor 2 [Source:HGNC         |             |                        |                    |                |
| Symbol;Acc:HGNC:29270]                               | -                                                      | 1439        | 1959                   | 1337               | 1643           |
| 3138                                                 | 16.75804983                                            | 22.07470338 | 19.78209366            |                    | 2034           |
| 21.71118895                                          | 29.73256032                                            | 34.69907976 |                        |                    |                |
| ENSG00000160447                                      | 492.6372745                                            | 531.882087  | 532.4211757            |                    |                |
| 295.251021                                           | 377.8337951                                            | 338.1545057 | 518.9801791            |                    |                |
| 337.079774                                           | 0.622938915                                            | 0.003126906 | 0.030814395            |                    | PKN3           |
| 9                                                    | 128702523                                              | 128720918   | +                      | 3375               |                |
| protein_coding                                       | protein kinase N3 [Source:HGNC Symbol;Acc:HGNC:17999]  |             |                        |                    |                |
| -                                                    | 543                                                    | 601         | 458                    | 285                | 331            |
| 7.87870312                                           | 8.437759365                                            | 8.44303418  | 4.69227143             |                    |                |
| 6.028393277                                          | 5.400616115                                            |             |                        |                    |                |
| ENSG00000134318                                      | 2196.454589                                            | 1648.74597  | 1643.763193            |                    |                |
| 1476.255105                                          | 1255.641011                                            | 1068.809777 | 1829.654584            |                    |                |
| 1266.901964                                          | 0.530961389                                            | 0.003129748 | 0.030825229            |                    | ROCK2          |
| 2                                                    | 11179761                                               | 11348330    | -                      | 10145              |                |
| protein_coding                                       | Rho associated coiled-coil containing protein kinase 2 |             |                        |                    |                |
| [Source:HGNC Symbol;Acc:HGNC:10252]                  | -                                                      |             | 2421                   | 1863               | 1414           |
| 1425                                                 | 1100                                                   | 1239        | 11.68614906            | 8.70136215         |                |
| 8.671699197                                          | 7.805035031                                            | 6.66481339  | 5.678717615            |                    |                |
| ENSG00000205531                                      | 2620.14079                                             | 2950.573841 | 2800.442385            |                    |                |
| 2282.238594                                          | 2064.958717                                            | 1997.872029 | 2790.385672            |                    |                |
| 2115.023113                                          | 0.39991841                                             | 0.003145184 | 0.030925997            |                    | NAP1L4         |
| 11                                                   | 2944431                                                | 2992377     | -                      | 5200               | protein_coding |
| nucleosome assembly protein 1 like 4 [Source:HGNC    |                                                        |             |                        |                    |                |
| Symbol;Acc:HGNC:7640]                                | -                                                      | 2888        | 3334                   | 2409               | 2203           |
| 2316                                                 | 27.19709566                                            | 30.38006458 | 28.82307441            |                    | 1809           |
| 23.5409073                                           | 21.38368673                                            | 20.70933863 |                        |                    |                |
| ENSG00000278635                                      | 9.979760626                                            | 14.15992245 | 9.299933199            |                    | 0              |
| 0                                                    | 0                                                      | 11.14653876 | 0                      | 5.912687492        |                |
| 0.003145671                                          | 0.030925997                                            | AC141557.2  | 12                     | 9415641            |                |
| 9416718                                              | +                                                      | 482         | unprocessed_pseudogene | WAS protein family |                |
| homolog 1 (WASH1) pseudogene                         | -                                                      | 11          | 16                     | 8                  | 0              |
| 0                                                    | 0                                                      | 1.117568959 | 1.572893745            | 1.032642025        |                |
| 0                                                    | 0                                                      | 0           |                        |                    |                |
| ENSG00000167716                                      | 1391.722982                                            | 1616.886145 | 1121.804442            |                    |                |
| 1448.283956                                          | 2231.616524                                            | 2728.5273   | 1376.804523            |                    |                |
| 2136.142593                                          | -0.633444737                                           | 0.003147392 | 0.030925997            |                    | WDR81          |
| 17                                                   | 1716523                                                | 1738599     | +                      | 7913               | protein_coding |
| repeat domain 81 [Source:HGNC Symbol;Acc:HGNC:26600] | -                                                      |             |                        |                    | WD             |
| 1827                                                 | 965                                                    | 1398        | 1955                   | 3163               | 1534           |
| 10.94016375                                          | 7.587400244                                            | 9.816983235 | 15.18633431            |                    |                |
| 18.58613316                                          |                                                        |             |                        |                    |                |
| ENSG00000163545                                      | 97.07585336                                            | 70.79961225 | 153.4488978            |                    |                |
| 36.25889732                                          | 50.22564044                                            | 32.78028372 | 107.1081211            |                    |                |

|                                              |                                                     |                |                  |       |
|----------------------------------------------|-----------------------------------------------------|----------------|------------------|-------|
| 39.75494049                                  | 1.430559211                                         | 0.003148572    | 0.030925997      | NUAK2 |
| 1                                            | 205302059                                           | 205321791      | - 3441           |       |
| protein_coding                               | NUAK family kinase 2 [Source:HGNC                   |                |                  |       |
| Symbol;Acc:HGNC:29558]                       | -                                                   | 107 80         | 132 35           | 44    |
| 38                                           | 1.522747126                                         | 1.101619856    | 2.386690504      |       |
| 0.565191231                                  | 0.785987002                                         | 0.513487578    |                  |       |
| ENSG00000196954                              | 847.3724022                                         | 1185.00851     | 953.2431529      |       |
| 1404.773279                                  | 1333.262455                                         | 1514.794164    | 995.2080217      |       |
| 1417.609966                                  | -0.510344744                                        | 0.00314913     | 0.030925997      | CASP4 |
| 11                                           | 104942866                                           | 104969436      | - 7256           |       |
| protein_coding                               | caspase 4 [Source:HGNC Symbol;Acc:HGNC:1505]        |                |                  | -     |
| 934                                          | 1339 820                                            | 1356 1168      | 1756 6.303449615 |       |
| 8.743991843                                  | 7.031102432                                         | 10.38423383    | 9.89447895       |       |
| 11.25273925                                  |                                                     |                |                  |       |
| ENSG00000134343                              | 6.350756762                                         | 18.58489822    | 2.3249833        |       |
| 96.34507003                                  | 30.82027936                                         | 30.19236658    | 9.086879426      |       |
| 52.45257199                                  | -2.509234304                                        | 0.003153055    | 0.030925997      | AN03  |
| 11                                           | 26309599                                            | 26663288       | + 7700           |       |
| protein_coding                               | anoctamin 3 [Source:HGNC Symbol;Acc:HGNC:14004]     |                |                  | -     |
| 7                                            | 21 2                                                | 93 27          | 35 0.044518036   |       |
| 0.12922752                                   | 0.016160177                                         | 0.671126314    | 0.215536288      |       |
| 0.211352961                                  |                                                     |                |                  |       |
| ENSG00000157557                              | 2147.463036                                         | 1860.259812    | 2359.858049      |       |
| 1495.938507                                  | 1615.210937                                         | 1587.255843    | 2122.526966      |       |
| 1566.135096                                  | 0.4381437                                           | 0.003153911    | 0.030925997      | ETS2  |
| 21                                           | 38805307                                            | 38824955       | + 4595           |       |
| protein_coding                               | "ETS proto-oncogene 2, transcription factor         |                |                  |       |
| [Source:HGNC Symbol;Acc:HGNC:3489]"          | ETS                                                 | 2367 2102      | 2030             |       |
| 1444                                         | 1415 1840                                           | 25.2255954     | 21.67572522      |       |
| 27.48636876                                  | 17.46198944                                         | 18.92859087    | 18.61929897      |       |
| ENSG00000123131                              | 1949.682326                                         | 2674.455353    | 2835.317134      |       |
| 1742.499008                                  | 1929.12119                                          | 1607.95918     | 2486.484938      |       |
| 1759.859793                                  | 0.498657746                                         | 0.003154153    | 0.030925997      | PRDX4 |
| X                                            | 23664262                                            | 23686399       | + 1904           |       |
| protein_coding                               | peroxiredoxin 4 [Source:HGNC Symbol;Acc:HGNC:17169] |                |                  |       |
| -                                            | 2149 3022                                           | 2439 1682      | 1690 1864        |       |
| 55.27110599                                  | 75.20625394                                         | 79.6987854     | 49.08751998      |       |
| 54.55909034                                  | 45.52081008                                         |                |                  |       |
| ENSG00000112139                              | 53.52780699                                         | 45.13475281    | 106.9492318      |       |
| 9.323716454                                  | 25.11282022                                         | 20.70333709    | 68.53726386      |       |
| 18.37995792                                  | 1.896198625                                         | 0.003158284    | 0.030925997      | MDGA1 |
| 6                                            | 37630679                                            | 37699306       | - 14187          |       |
| protein_coding                               | MAM domain containing glycosylphosphatidylinositol  |                |                  |       |
| anchor 1 [Source:HGNC Symbol;Acc:HGNC:19267] | -                                                   | 59 51          |                  |       |
| 92                                           | 9 22                                                | 24 0.203652679 | 0.170335845      |       |
| 0.403463364                                  | 0.035250395                                         | 0.095318999    | 0.078659592      |       |
| ENSG00000110080                              | 1491.520588                                         | 1649.630965    | 1782.099699      |       |
| 1247.306068                                  | 1186.010009                                         | 1199.068273    | 1641.083751      |       |
| 1210.794783                                  | 0.438279137                                         | 0.003158794    | 0.030925997      |       |
| ST3GAL4 11                                   | 126355640                                           | 126440344      | + 4465           |       |



|                 |                                                                                          |             |                |                                                                                      |             |
|-----------------|------------------------------------------------------------------------------------------|-------------|----------------|--------------------------------------------------------------------------------------|-------------|
| protein_coding  | "ST3 beta-galactoside alpha-2,3-sialyltransferase 4 [Source:HGNC Symbol;Acc:HGNC:10864]" | -           | 1644           | 1864                                                                                 | 1533        |
|                 | 1204                                                                                     | 1039        | 1390           | 18.03055245                                                                          | 19.78112037 |
| 21.36129306     | 14.98363094                                                                              |             | 14.30347116    | 14.47519274                                                                          |             |
| ENSG00000165072 | 168.7486797                                                                              |             | 110.6243941    | 218.5484302                                                                          |             |
| 96.34507003     | 26.25431205                                                                              |             | 66.42320649    | 165.9738347                                                                          |             |
| 63.00752952     | 1.392487418                                                                              |             | 0.003159211    | 0.030925997                                                                          | MAMDC2      |
|                 | 9                                                                                        | 70043581    | 70226970       | +                                                                                    | 3854        |
| protein_coding  | MAM domain containing 2 [Source:HGNC Symbol;Acc:HGNC:23673]                              | -           | 186            | 125                                                                                  | 188         |
|                 | 77                                                                                       | 2.363360199 | 1.536826156    | 3.034960098                                                                          | 93          |
| 1.340859526     | 0.366828851                                                                              |             | 0.928987848    |                                                                                      | 23          |
| ENSG00000176485 | 246.7722627                                                                              |             | 177.8840258    | 161.5863393                                                                          |             |
| 131.5679989     | 55.93309958                                                                              |             | 75.91223598    | 195.4142093                                                                          |             |
| 87.80444481     | 1.154459754                                                                              |             | 0.003181058    | 0.031122646                                                                          |             |
| PLA2G16         | 11                                                                                       | 63573195    | 63616883       | -                                                                                    | 3116        |
| protein_coding  | phospholipase A2 group XVI [Source:HGNC Symbol;Acc:HGNC:17825]                           | -           | 272            | 201                                                                                  | 139         |
|                 | 88                                                                                       | 4.274645839 | 3.056504568    | 2.775391142                                                                          | 127         |
| 2.264739817     | 0.96659822                                                                               |             | 1.313155755    |                                                                                      | 49          |
| ENSG00000112245 | 16.33051739                                                                              |             | 7.964956378    | 9.299933199                                                                          | 0           |
|                 | 0                                                                                        | 0           | 11.19846899    | 0                                                                                    | 5.919125837 |
| 0.003188641     | 0.031162776                                                                              |             | PTP4A1         | 6                                                                                    | 63521746    |
| 63583377        | +                                                                                        | 5281        | protein_coding | "protein tyrosine phosphatase type IVA, member 1 [Source:HGNC Symbol;Acc:HGNC:9634]" |             |
|                 | -                                                                                        | 18          | 9              | 8                                                                                    | 0           |
| 0.166911024     | 0.080751906                                                                              |             | 0.09424985     | 0                                                                                    | 0           |
| ENSG00000173402 | 3447.553671                                                                              |             | 3447.056121    | 4086.158149                                                                          | 0           |
| 3040.567533     | 2753.27829                                                                               |             | 2168.67456     | 3660.25598                                                                           |             |
| 2654.173461     | 0.463814821                                                                              |             | 0.003188684    | 0.031162776                                                                          | DAG1        |
|                 | 3                                                                                        | 49468703    | 49535618       | +                                                                                    | 6923        |
| protein_coding  | dystroglycan 1 [Source:HGNC Symbol;Acc:HGNC:2666]                                        | -           | 3800           | 3895                                                                                 | 3515        |
|                 |                                                                                          |             |                |                                                                                      | 2935        |
| 26.87929963     | 26.65873706                                                                              |             | 31.58914304    | 23.55731654                                                                          | 2412        |
| 21.41560422     | 16.88503479                                                                              |             |                |                                                                                      | 2514        |
| ENSG00000070759 | 63.50756762                                                                              |             | 53.09970919    | 86.02438209                                                                          |             |
| 27.97114936     | 9.131934625                                                                              |             | 19.84069804    | 67.5438863                                                                           |             |
| 18.98126068     | 1.82394722                                                                               |             | 0.003193659    | 0.031194168                                                                          | TESK2       |
|                 | 1                                                                                        | 45343883    | 45491166       | -                                                                                    | 3322        |
| protein_coding  | testis associated actin remodelling kinase 2 [Source:HGNC Symbol;Acc:HGNC:11732]         | -           |                | 70                                                                                   | 60          |
|                 | 27                                                                                       | 8           | 23             | 1.031875012                                                                          | 0.855811392 |
| 1.385922477     | 0.451623133                                                                              |             | 0.148025903    | 0.321928352                                                                          | 74          |
| ENSG00000213096 | 286.6913052                                                                              |             | 261.0735702    | 322.010187                                                                           |             |
| 210.3016045     | 143.8279703                                                                              |             | 100.0661293    | 289.9250208                                                                          |             |
| 151.398568      | 0.938932718                                                                              |             | 0.003195835    | 0.03119819                                                                           | ZNF254      |
|                 | 19                                                                                       | 24033405    | 24129961       | +                                                                                    | 7602        |
| protein_coding  | zinc finger protein 254 [Source:HGNC Symbol;Acc:HGNC:13047]                              | zf-C2H2     | 316            | 295                                                                                  | 277         |
|                 | 116                                                                                      | 2.035578714 | 1.838741133    | 2.267037742                                                                          | 203         |
|                 |                                                                                          |             |                |                                                                                      | 126         |

|                                     |                                                         |             |             |             |             |      |                      |
|-------------------------------------|---------------------------------------------------------|-------------|-------------|-------------|-------------|------|----------------------|
| 1.483816569                         | 1.018802589                                             | 0.709514282 |             |             |             |      |                      |
| ENSG00000127863                     | 776.6068269                                             | 615.9566266 | 807.9316967 |             |             |      |                      |
| 574.9625147                         | 461.1626986                                             | 359.7204819 | 733.4983834 |             |             |      |                      |
| 465.2818984                         | 0.657248204                                             | 0.003214093 | 0.031359128 |             |             |      |                      |
| TNFRSF19                            | 13                                                      | 23570370    | 23676104    | +           |             |      | 5113                 |
|                                     | protein_coding TNF receptor superfamily member 19       |             |             |             |             |      |                      |
| [Source:HGNC Symbol;Acc:HGNC:11915] |                                                         | -           | 856         | 696         |             |      | 695                  |
| 555                                 | 404                                                     | 417         | 8.198353784 | 6.45000257  |             |      |                      |
| 8.456990806                         | 6.03155419                                              | 4.856830337 | 3.792200406 |             |             |      |                      |
| ENSG00000135372                     | 1973.270851                                             | 2031.063876 | 1909.973781 |             |             |      |                      |
| 2339.216861                         | 2840.031668                                             | 2676.768957 | 1971.436169 |             |             |      |                      |
| 2618.672496                         | -0.409372143                                            | 0.003233492 | 0.031522367 |             |             |      | NAT10                |
| 11                                  | 34105602                                                | 34147670    | +           | 5242        |             |      |                      |
|                                     | protein_coding N-acetyltransferase 10 [Source:HGNC      |             |             |             |             |      |                      |
| Symbol;Acc:HGNC:29830]              |                                                         | -           | 2175        | 2295        | 1643        | 2258 | 2488                 |
| 3103                                | 20.31846655                                             | 20.7449367  | 19.50057393 |             |             |      |                      |
| 23.93530493                         | 29.17431848                                             | 27.52426795 |             |             |             |      |                      |
| ENSG00000108798                     | 150.6036604                                             | 171.6890597 | 168.5612892 |             |             |      |                      |
| 89.09329056                         | 85.61188711                                             | 32.78028372 | 163.6180031 |             |             |      |                      |
| 69.16182047                         | 1.248251671                                             | 0.003234388 | 0.031522367 |             |             |      | ABI3                 |
| 17                                  | 49210227                                                | 49223225    | +           | 2456        |             |      |                      |
|                                     | protein_coding ABI family member 3 [Source:HGNC         |             |             |             |             |      |                      |
| Symbol;Acc:HGNC:29859]              |                                                         | -           | 166         | 194         | 145         | 86   | 75                   |
| 38                                  | 3.309850738                                             | 3.74282747  | 3.673216161 |             |             |      |                      |
| 1.945728017                         | 1.877069103                                             | 0.719426204 |             |             |             |      |                      |
| ENSG00000120217                     | 278.5260466                                             | 277.8884781 | 245.2857381 |             |             |      |                      |
| 440.2866103                         | 404.0881072                                             | 415.7920198 | 267.2334209 |             |             |      |                      |
| 420.0555791                         | -0.651470148                                            | 0.003253154 | 0.031687795 |             |             |      | CD274                |
| 9                                   | 5450503                                                 | 5470566     | +           | 4108        |             |      | protein_coding CD274 |
|                                     | molecule [Source:HGNC Symbol;Acc:HGNC:17635]            |             |             |             |             |      |                      |
| 211                                 | 425                                                     | 354         | 482         | 3.659625323 | 3.621809921 |      |                      |
| 3.195647493                         | 5.748711827                                             | 5.296880648 | 5.455664076 |             |             |      |                      |
| ENSG00000210196                     | 288.5058072                                             | 242.488672  | 261.5606212 |             |             |      |                      |
| 394.7039966                         | 430.3424192                                             | 426.1436884 | 264.1850335 |             |             |      |                      |
| 417.063368                          | -0.658701571                                            | 0.003256583 | 0.031697267 |             |             |      | MT-TP                |
| MT                                  | 15956                                                   | 16023       | -           | 68          |             |      | Mt_tRNA              |
|                                     | mitochondrially encoded tRNA proline [Source:HGNC       |             |             |             |             |      |                      |
| Symbol;Acc:HGNC:7494]               |                                                         | -           | 318         | 274         | 225         | 381  | 377                  |
| 494                                 | 229.0060157                                             | 190.9273263 | 205.8640213 |             |             |      |                      |
| 311.3351148                         | 340.784472                                              | 337.7917624 |             |             |             |      |                      |
| ENSG00000112761                     | 2.721752898                                             | 0           | 1.16249165  | 11.39565344 |             |      |                      |
| 20.54685291                         | 29.32972754                                             | 1.294748183 | 20.42407796 |             |             |      |                      |
| -3.981177332                        | 0.003259201                                             | 0.031697267 | WISP3       | 6           |             |      |                      |
| 112054072                           | 112070969                                               | +           | 3202        |             |             |      | protein_coding       |
|                                     | WNT1 inducible signaling pathway protein 3 [Source:HGNC |             |             |             |             |      |                      |
| Symbol;Acc:HGNC:12771]              |                                                         | -           | 3           | 0           | 1           | 11   | 18                   |
| 34                                  | 0.045880549                                             | 0           | 0.019430569 | 0.190890098 |             |      |                      |
| 0.345540166                         | 0.493728967                                             |             |             |             |             |      |                      |
| ENSG00000117305                     | 574.2898615                                             | 683.2162582 | 743.9946559 |             |             |      |                      |
| 917.8680865                         | 949.721201                                              | 1000.661293 | 667.1669252 |             |             |      |                      |

|                                                  |                                                       |                |                 |             |
|--------------------------------------------------|-------------------------------------------------------|----------------|-----------------|-------------|
| 956.0835267                                      | -0.520197168                                          | 0.003259502    | 0.031697267     | HMGCL       |
| 1                                                | 23801885                                              | 23838620       | - 5658          |             |
| protein_coding                                   | 3-hydroxy-3-methylglutaryl-CoA lyase [Source:HGNC     |                |                 |             |
| Symbol;Acc:HGNC:5005]                            | -                                                     | 633 772        | 640 886         | 832         |
| 1160                                             | 5.4785982                                             | 6.465182639    | 7.037588633     |             |
| 8.701273554                                      | 9.038736864                                           | 9.532922542    |                 |             |
| ENSG00000141424                                  | 2634.656805                                           | 2177.088077    | 2923.666499     |             |
| 1953.836581                                      | 2020.440536                                           | 1565.689867    | 2578.47046      |             |
| 1846.655661                                      | 0.481724132                                           | 0.003264465    | 0.031728091     |             |
| SLC39A6 18                                       | 36108532                                              | 36129385       | - 3682          |             |
| protein_coding                                   | solute carrier family 39 member 6 [Source:HGNC        |                |                 |             |
| Symbol;Acc:HGNC:18607]                           | -                                                     | 2904 2460      | 2515 1886       | 1770        |
| 1815                                             | 38.62260045                                           | 31.6575837     | 42.49727193     |             |
| 28.46229711                                      | 29.54859547                                           | 22.92048818    |                 |             |
| ENSG00000253738                                  | 624.1886646                                           | 685.8712437    | 617.2830661     |             |
| 449.6103268                                      | 470.2946332                                           | 365.7589552    | 642.4476581     |             |
| 428.5546384                                      | 0.585791371                                           | 0.003270561    | 0.03176913      |             |
| OTUD6B-AS1                                       | 8                                                     | 91059909       | 91070189        | - 6009      |
| antisense                                        | OTUD6B antisense RNA 1 (head to head)                 |                |                 |             |
| [Source:HGNC Symbol;Acc:HGNC:50466]              | -                                                     |                | 688 775         | 531         |
| 434                                              | 412 424                                               | 5.606798104    | 6.111192152     |             |
| 5.497929463                                      | 4.013281001                                           | 4.214464231    | 3.28091267      |             |
| ENSG00000117318                                  | 3675.273663                                           | 3905.483611    | 4888.277388     |             |
| 2594.065111                                      | 3038.651247                                           | 3409.149507    | 4156.344887     |             |
| 3013.955288                                      | 0.463161986                                           | 0.003273799    | 0.03176913      | ID3         |
| 1                                                | 23557918                                              | 23559794       | - 1797          |             |
| protein_coding                                   | "inhibitor of DNA binding 3, HLH protein [Source:HGNC |                |                 |             |
| Symbol;Acc:HGNC:5362]"                           | bHLH                                                  | 4051 4413      | 4205 2504       | 2662        |
| 3952                                             | 110.393334                                            | 116.3622985    | 145.5877283     |             |
| 77.42804452                                      | 91.05574127                                           | 102.2586081    |                 |             |
| ENSG00000145757                                  | 9.07250966                                            | 6.194966072    | 18.5998664      | 0           |
| 0                                                | 0                                                     | 11.28911404    | 0               | 5.926158928 |
| 0.003274076                                      | 0.03176913                                            | SPATA9 5       | 95652181        |             |
| 95698711                                         | - 2811                                                | protein_coding | spermatogenesis |             |
| associated 9 [Source:HGNC Symbol;Acc:HGNC:22988] | -                                                     |                |                 | 10          |
| 7                                                | 16 0                                                  | 0 0            | 0.174207897     |             |
| 0.117995008                                      | 0.354132662                                           | 0 0            | 0               |             |
| ENSG00000181649                                  | 304.8363246                                           | 457.5424942    | 654.4827989     |             |
| 266.2439032                                      | 302.4953345                                           | 217.3850394    | 472.2872059     |             |
| 262.0414257                                      | 0.849550628                                           | 0.003277074    | 0.031780789     | PHLDA2      |
| 11                                               | 2928273 2929455                                       | - 955          | protein_coding  |             |
| pleckstrin homology like domain                  | family A member 2 [Source:HGNC                        |                |                 |             |
| Symbol;Acc:HGNC:12385]                           | -                                                     | 336 517        | 563 257         | 265         |
| 252                                              | 17.22917925                                           | 25.65154999    | 36.67852562     |             |
| 14.95346351                                      | 17.0564978                                            | 12.26953736    |                 |             |
| ENSG00000073536                                  | 977.1092904                                           | 1360.23755     | 1357.790247     |             |
| 1566.384364                                      | 1797.849629                                           | 1905.569651    | 1231.712363     |             |
| 1756.601215                                      | -0.512695664                                          | 0.003283342    | 0.031807243     | NLE1        |
| 17                                               | 35128753                                              | 35142315       | - 5463          |             |
| protein_coding                                   | notchless homolog 1 [Source:HGNC                      |                |                 |             |

|                        |                                                |                                      |             |             |             |             |
|------------------------|------------------------------------------------|--------------------------------------|-------------|-------------|-------------|-------------|
| Symbol;Acc:HGNC:19889] | -                                              | 1077                                 | 1537        | 1168        | 1512        | 1575        |
| 2209                   | 9.654130972                                    | 13.33119582                          |             | 13.30204733 |             |             |
| 15.37916068            | 17.72134652                                    | 18.80163137                          |             |             |             |             |
| ENSG00000114520        | 653.2206955                                    | 660.2063842                          |             | 668.4326987 |             |             |
| 491.0490666            | 405.229599                                     | 451.1602207                          |             | 660.6199261 |             |             |
| 449.1462954            | 0.556099808                                    | 0.003283398                          |             | 0.031807243 |             | SNX4        |
| 3                      | 125446644                                      | 125520197                            |             | -           | 2709        |             |
| protein_coding         | sorting nexin 4                                | [Source:HGNC Symbol;Acc:HGNC:11175]  |             |             |             |             |
| -                      | 720                                            | 746                                  | 575         | 474         | 355         | 523         |
| 13.01523982            | 13.04837001                                    |                                      | 13.20582951 |             | 9.722576753 |             |
| 8.055021579            | 8.976844494                                    |                                      |             |             |             |             |
| ENSG00000058804        | 3160.862365                                    |                                      | 2606.310726 |             | 2650.480962 |             |
| 2461.461144            | 1746.482497                                    |                                      | 1755.470457 |             | 2805.884684 |             |
| 1987.804699            | 0.497472142                                    |                                      | 0.003288411 |             | 0.031838369 | NDC1        |
| 1                      | 53765460                                       |                                      | 53838860    |             | -           | 5135        |
| protein_coding         | NDC1 transmembrane nucleoporin                 | [Source:HGNC                         |             |             |             |             |
| Symbol;Acc:HGNC:25525] | -                                              | 3484                                 | 2945        | 2280        | 2376        | 1530        |
| 2035                   | 33.22510652                                    |                                      | 27.17510883 |             | 27.62493378 |             |
| 25.71094457            | 18.31463817                                    |                                      | 18.42701476 |             |             |             |
| ENSG00000160445        | 729.4297766                                    |                                      | 739.855948  |             | 776.5444221 |             |
| 944.8032674            | 974.8340213                                    |                                      | 1407.826922 |             | 748.6100489 |             |
| 1109.154737            | -0.568367755                                   |                                      | 0.003319104 |             | 0.032117958 | ZER1        |
| 9                      | 128729786                                      |                                      | 128772414   |             | -           | 4370        |
| protein_coding         | zyg-11 related cell cycle regulator            | [Source:HGNC                         |             |             |             |             |
| Symbol;Acc:HGNC:30960] | -                                              | 804                                  | 836         | 668         | 912         | 854         |
| 1632                   | 9.009554056                                    |                                      | 9.064655037 |             | 9.510467638 |             |
| 11.59646029            | 12.01223428                                    |                                      | 17.364798   |             |             |             |
| ENSG00000198331        | 278.5260466                                    |                                      | 222.1337834 |             | 212.7359719 |             |
| 100.488944             | 140.4034949                                    |                                      | 141.4728034 |             | 237.7986006 |             |
| 127.4550808            | 0.900049318                                    |                                      | 0.003323166 |             | 0.032139684 | HYLS1       |
| 11                     | 125883614                                      |                                      | 125900648   |             | +           | 2999        |
| protein_coding         | "HYLS1, centriolar and ciliogenesis associated | [Source:HGNC Symbol;Acc:HGNC:26558]" |             |             |             |             |
| 97                     | 123                                            | 164                                  | 5.012917915 |             | 307         | 251         |
| 3.796483097            | 1.797245116                                    |                                      | 2.521018344 |             | 3.965735058 | 183         |
| ENSG00000164236        | 104.3338611                                    |                                      | 107.0844135 |             | 2.542719188 |             |
| 34.18696033            | 68.48950969                                    |                                      | 31.91764468 |             | 133.6865397 |             |
| 44.8647049             | 1.364204313                                    |                                      | 0.003328847 |             | 115.0349381 |             |
| ANKRD33B               | 5                                              | 10564330                             | 10657816    |             | 0.032177032 | 9783        |
| protein_coding         | ankyrin repeat domain 33B                      | [Source:HGNC                         |             |             |             |             |
| Symbol;Acc:HGNC:35240] | -                                              | 115                                  | 121         | 115         | 33          | 60          |
| 37                     | 0.575644647                                    |                                      | 0.586056865 |             | 0.731362407 |             |
| 0.187436398            | 0.376987159                                    |                                      | 0.175857416 |             |             |             |
| ENSG00000122862        | 620.5596607                                    |                                      | 717.7310692 |             | 798.6317635 |             |
| 509.6964995            | 446.3233048                                    |                                      | 485.6657825 |             | 712.3074978 |             |
| 480.5618623            | 0.566656473                                    |                                      | 0.003336551 |             | 0.032233891 | SRGN        |
| 10                     | 69088106                                       |                                      | 69104811    |             | +           | 1220        |
| protein_coding         | serglycin                                      | [Source:HGNC Symbol;Acc:HGNC:9361]   |             |             |             |             |
| 684                    | 811                                            | 687                                  | 492         | 391         | 563         | 27.45522168 |
| 31.49832534            | 35.03513159                                    |                                      | 22.40873371 |             | 19.69991203 |             |

|                        |                                                       |             |             |  |  |  |           |
|------------------------|-------------------------------------------------------|-------------|-------------|--|--|--|-----------|
|                        | 21.45752278                                           |             |             |  |  |  |           |
| ENSG00000101654        | 1751.901615                                           | 1425.727192 | 1684.450401 |  |  |  |           |
| 2267.735035            | 2002.176667                                           | 2314.460558 | 1620.693069 |  |  |  |           |
| 2194.790753            | -0.437962716                                          | 0.003341845 | 0.032267415 |  |  |  | RNMT      |
| 18                     | 13726660                                              | 13764558    | + 6982      |  |  |  |           |
| protein_coding         | RNA guanine-7 methyltransferase [Source:HGNC          |             |             |  |  |  |           |
| Symbol;Acc:HGNC:10075] | -                                                     | 1931 1611   | 1449 2189   |  |  |  | 1754      |
| 2683                   | 13.54350626                                           | 10.9330702  | 12.9120556  |  |  |  |           |
| 17.42119575            | 15.4417709                                            | 17.86783142 |             |  |  |  |           |
| ENSG00000105499        | 20.86677222                                           | 69.02962194 | 51.1496326  |  |  |  |           |
| 113.9565344            | 102.7342645                                           | 166.4893357 | 47.01534225 |  |  |  |           |
| 127.7267116            | -1.44414988                                           | 0.003353626 | 0.032363493 |  |  |  |           |
| PLA2G4C 19             | 48047843                                              | 48110817    | - 6613      |  |  |  |           |
| protein_coding         | phospholipase A2 group IVC [Source:HGNC               |             |             |  |  |  |           |
| Symbol;Acc:HGNC:9037]  | -                                                     | 23 78       | 44 110      |  |  |  | 90        |
| 193                    | 0.170316999                                           | 0.558885086 | 0.413962499 |  |  |  |           |
| 0.924285641            | 0.836548928                                           | 1.357031111 |             |  |  |  |           |
| ENSG00000157538        | 1536.883136                                           | 1563.786436 | 1589.126085 |  |  |  |           |
| 2075.044895            | 2209.928179                                           | 1927.998266 | 1563.265219 |  |  |  |           |
| 2070.990447            | -0.405528592                                          | 0.003357337 | 0.032373392 |  |  |  | VPS26C    |
| 21                     | 37223420                                              | 37267919    | - 9301      |  |  |  |           |
| protein_coding         | VPS26 endosomal protein sorting factor C [Source:HGNC |             |             |  |  |  |           |
| Symbol;Acc:HGNC:3044]  | -                                                     | 1694 1767   | 1367 2003   |  |  |  | 1936      |
| 2235                   | 8.918923629                                           | 9.001882626 | 9.144200011 |  |  |  |           |
| 11.96639539            | 12.79449264                                           | 11.17323418 |             |  |  |  |           |
| ENSG00000227496        | 7.258007728                                           | 16.81490791 | 9.299933199 |  |  |  | 0         |
| 0                      | 0                                                     | 11.12428295 | 0           |  |  |  |           |
| 0.003358312            | 0.032373392                                           | AC099066.2  | 1           |  |  |  | 225700604 |
| 225752243              | +                                                     | 1530        | antisense   |  |  |  | novel     |
| transcript             | -                                                     | 8           | 19          |  |  |  | 0         |
| 0.25605145             | 0.588421606                                           | 0.325315984 | 0           |  |  |  | 0         |
| 0                      |                                                       |             |             |  |  |  |           |
| ENSG00000133265        | 2340.707492                                           | 3028.453414 | 2902.74165  |  |  |  |           |
| 3244.653326            | 3989.513939                                           | 4050.952957 | 2757.300852 |  |  |  |           |
| 3761.706741            | -0.448299985                                          | 0.003364252 | 0.032412992 |  |  |  | HSPBP1    |
| 19                     | 55262231                                              | 55280381    | - 2159      |  |  |  |           |
| protein_coding         | HSPA (Hsp70) binding protein 1 [Source:HGNC           |             |             |  |  |  |           |
| Symbol;Acc:HGNC:24989] | -                                                     | 2580 3422   | 2497 3132   |  |  |  | 3495      |
| 4696                   | 58.51884519                                           | 75.10239792 | 71.95694996 |  |  |  |           |
| 80.60855847            | 99.50431125                                           | 101.1361609 |             |  |  |  |           |
| ENSG00000169689        | 1456.1378                                             | 1936.369395 | 1779.774716 |  |  |  |           |
| 1301.17643             | 1312.715602                                           | 1054.144913 | 1724.09397  |  |  |  |           |
| 1222.678982            | 0.496319296                                           | 0.003369622 | 0.032447056 |  |  |  | CENPX     |
| 17                     | 82018702                                              | 82024107    | - 1531      |  |  |  |           |
| protein_coding         | centromere protein X [Source:HGNC                     |             |             |  |  |  |           |
| Symbol;Acc:HGNC:11422] | -                                                     | 1605 2188   | 1531 1256   |  |  |  | 1150      |
| 1222                   | 51.33676873                                           | 67.71713379 | 62.216682   |  |  |  |           |
| 45.58547582            | 46.1710775                                            | 37.11308304 |             |  |  |  |           |
| ENSG00000198355        | 1468.839314                                           | 1846.984885 | 1690.262859 |  |  |  |           |
| 1680.340899            | 2693.920714                                           | 3242.660171 | 1668.695686 |  |  |  |           |

|                                     |                                                                                                           |                |               |             |
|-------------------------------------|-----------------------------------------------------------------------------------------------------------|----------------|---------------|-------------|
| 2538.973928                         | -0.605790521                                                                                              | 0.00338265     | 0.032554222   | PIM3        |
| 22                                  | 49960513                                                                                                  | 49964080       | + 2461        |             |
| protein_coding                      | "Pim-3 proto-oncogene, serine/threonine kinase<br>[Source:HGNC Symbol;Acc:HGNC:19310]"                    |                |               |             |
| 1622                                | 2360                                                                                                      | 3759           | - 1619 2087   | 1454        |
| 36.75865731                         | 36.62277762                                                                                               | 58.94510552    | 40.18252987   |             |
| ENSG00000136950                     | 1082.350402                                                                                               | 1399.177337    | 71.02180902   |             |
| 1473.1472                           | 1725.935644                                                                                               | 1877.102563    | 1120.64195    |             |
| 1692.061802                         | -0.494713596                                                                                              | 0.003384432    | 1200.72323    |             |
| 9                                   | 124862130                                                                                                 | 124877733      | 0.032554222   | ARPC5L      |
|                                     |                                                                                                           |                | + 3610        |             |
| protein_coding                      | actin related protein 2/3 complex subunit 5 like<br>[Source:HGNC Symbol;Acc:HGNC:23366]                   |                |               |             |
| 1422                                | 1512                                                                                                      | 2176           | - 1193 1581   | 964         |
| 16.61409459                         | 21.88791725                                                                                               | 25.74494388    | 20.75157713   |             |
| ENSG00000136754                     | 1100.495422                                                                                               | 1011.54946     | 28.02739326   |             |
| 1469.003326                         | 1619.776904                                                                                               | 1513.068885    | 1248.516032   |             |
| 1533.949705                         | -0.45413275                                                                                               | 0.003386328    | 1120.186971   |             |
| 10                                  | 26746593                                                                                                  | 26861087       | 0.032554761   | ABI1        |
| protein_coding                      | abl interactor 1 [Source:HGNC Symbol;Acc:HGNC:11320]                                                      |                |               |             |
| -                                   | 1213                                                                                                      | 1143           | - 4218        |             |
| 14.08260211                         | 12.8400317                                                                                                | 1074 1418      | 1419 1754     |             |
| 20.6786975                          | 19.33543877                                                                                               | 15.84180097    | 18.68020763   |             |
| ENSG00000182183                     | 0                                                                                                         | 0              | 21.75533839   | 0           |
| 19.84069804                         | 0                                                                                                         | 13.86534548    | -6.271886673  | 0.003391663 |
|                                     | 0.032588331                                                                                               | SHISAL2A       | 1             | 52633344    |
| 52669683                            | + 2508                                                                                                    | protein_coding | shisa like 2A |             |
| [Source:HGNC Symbol;Acc:HGNC:28757] | -                                                                                                         | 0              | 0             | 0           |
| 21                                  | 0                                                                                                         | 23             | 0             | 0.465268667 |
| 0                                   | 0.426413869                                                                                               |                |               |             |
| ENSG00000102977                     | 964.4077768                                                                                               | 1238.108219    | 1031.130093   |             |
| 1436.888302                         | 1560.419329                                                                                               | 1480.288602    | 1077.88203    |             |
| 1492.532078                         | -0.469109701                                                                                              | 0.003393872    | 0.032591859   | ACD         |
| 16                                  | 67657512                                                                                                  | 67660815       | - 3223        |             |
| protein_coding                      | "ACD, shelterin complex subunit and telomerase<br>recruitment factor [Source:HGNC Symbol;Acc:HGNC:25070]" |                |               |             |
| 1399                                | 887                                                                                                       | 1387           | - 1063        |             |
| 20.567611                           | 17.12261773                                                                                               | 1367 1716      | 16.15108276   |             |
| 24.75642878                         | 23.91267708                                                                                               | 26.07087271    |               |             |
| ENSG00000154144                     | 940.8192517                                                                                               | 869.0652404    | 703.3074482   |             |
| 1136.457439                         | 1122.086467                                                                                               | 1346.57955     | 837.7306468   |             |
| 1201.707819                         | -0.519981428                                                                                              | 0.003397425    | 0.03260827    | TBRG1       |
| 11                                  | 124622836                                                                                                 | 124635398      | + 6627        |             |
| protein_coding                      | transforming growth factor beta regulator 1<br>[Source:HGNC Symbol;Acc:HGNC:29551]                        |                |               |             |
| 1097                                | 983                                                                                                       | 1561           | - 605         |             |
| 5.679959652                         | 9.198175691                                                                                               | 7.662852559    | 1037 982      |             |
| ENSG00000121680                     | 660.4787032                                                                                               | 9.117670796    | 7.021355428   |             |
| 882.6451577                         | 1294.451733                                                                                               | 874.3752113    | 10.95259303   |             |
| 1156.73094                          | -0.584187027                                                                                              | 1293.095929    | 780.0318971   |             |
| 11                                  | 45909669                                                                                                  | 45918812       | 771.6286039   |             |
|                                     |                                                                                                           |                | 0.032760518   | PEX16       |
|                                     |                                                                                                           |                | - 3013        |             |

|                                             |                                    |                         |              |                |      |        |
|---------------------------------------------|------------------------------------|-------------------------|--------------|----------------|------|--------|
| protein_coding                              | peroxisomal biogenesis factor 16   | [Source:HGNC            |              |                |      |        |
| Symbol;Acc:HGNC:8857]                       | -                                  | 728                     | 988          | 671            | 852  | 1134   |
| 1499                                        | 11.83207547                        | 15.53761134             | 13.85575626  |                |      |        |
| 15.71276107                                 | 23.13456208                        | 23.13308317             |              |                |      |        |
| ENSG0000010361                              | 540.7215757                        | 683.2162582             | 577.75835    |                |      |        |
| 732.4297259                                 | 899.4955606                        | 1079.161446             | 600.5653946  |                |      |        |
| 903.6955774                                 | -0.589799503                       | 0.003422218             | 0.032810627  |                |      | FUZ    |
| 19                                          | 49806869                           | 49817376                | -            | 2950           |      |        |
| protein_coding                              | fuzzy planar cell polarity protein | [Source:HGNC            |              |                |      |        |
| Symbol;Acc:HGNC:26219]                      | -                                  | 596                     | 772          | 497            | 707  | 788    |
| 1251                                        | 9.893567641                        | 12.40000114             | 10.48192914  |                |      |        |
| 13.31709327                                 | 16.4191837                         | 19.71815662             |              |                |      |        |
| ENSG00000245857                             | 22.68127415                        | 7.079961225             | 4.6499666    |                |      | 0      |
| 0                                           | 0                                  | 11.47040066             | 0            | 5.955865666    |      |        |
| 0.003443831                                 | 0.032999962                        | GS1-24F4.2              | 8            | 6835554        |      |        |
| 6885276 +                                   | 1433                               | lincRNA uncharacterized | LOC100652791 |                |      |        |
| [Source:NCBI gene;Acc:100652791]            |                                    | -                       | 25           | 8              |      | 4      |
| 0                                           | 0                                  | 0                       | 0.854323793  | 0.264527141    |      |        |
| 0.173668338                                 | 0                                  | 0                       | 0            |                |      |        |
| ENSG00000134851                             | 1310.070395                        | 1457.587017             | 1529.839011  |                |      |        |
| 1071.191424                                 | 1119.803483                        | 916.1226661             | 1432.498808  |                |      |        |
| 1035.705858                                 | 0.468324918                        | 0.00344633              | 0.033006026  |                |      |        |
| TMEM165 4                                   | 55395957                           | 55453397                | +            | 7045           |      |        |
| protein_coding                              | transmembrane protein 165          | [Source:HGNC            |              |                |      |        |
| Symbol;Acc:HGNC:30760]                      | -                                  | 1444                    | 1647         | 1316           | 1034 | 981    |
| 1062                                        | 10.03725319                        | 11.07743072             | 11.62202321  |                |      |        |
| 8.155518645                                 | 8.559243272                        | 7.00929821              |              |                |      |        |
| ENSG00000135631                             | 1384.464974                        | 1469.091954             | 1646.088176  |                |      |        |
| 1750.786756                                 | 2276.134705                        | 2169.537199             | 1499.881702  |                |      |        |
| 2065.48622                                  | -0.462055493                       | 0.003451807             | 0.033040596  |                |      |        |
| RAB11FIP5                                   | 2                                  | 73073382                | 73156721     | -              |      | 7058   |
| protein_coding                              | RAB11 family interacting protein 5 | [Source:HGNC            |              |                |      |        |
| Symbol;Acc:HGNC:24845]                      | -                                  | 1526                    | 1660         |                |      | 1416   |
| 1690                                        | 1994                               | 2515                    | 10.58769844  | 11.14430206    |      |        |
| 12.48212266                                 | 13.30506787                        | 17.36564266             | 16.56865876  |                |      |        |
| ENSG00000136213                             | 673.1802168                        | 829.2404585             | 841.6439545  |                |      |        |
| 887.8250001                                 | 1231.669683                        | 1394.024697             | 781.3548766  |                |      |        |
| 1171.173127                                 | -0.584688685                       | 0.003453752             | 0.033041326  |                |      | CHST12 |
| 7                                           | 2403560                            | 2448483 +               | 16143        | protein_coding |      |        |
| carbohydrate sulfotransferase 12            | [Source:HGNC                       | Symbol;Acc:HGNC:17423]  |              |                |      |        |
| -                                           | 742                                | 937                     | 724          | 857            | 1079 | 1616   |
| 2.250859267                                 | 2.750310868                        | 2.790365965             | 2.949908999  |                |      |        |
| 4.108511984                                 | 4.654661762                        |                         |              |                |      |        |
| ENSG00000132507                             | 10701.02514                        | 13296.16718             | 14092.88627  |                |      |        |
| 8940.408111                                 | 8901.353276                        | 10702.76263             | 12696.69287  |                |      |        |
| 9514.841341                                 | 0.41603254                         | 0.003462246             | 0.033096962  |                |      | EIF5A  |
| 17                                          | 7306999                            | 7312463 +               | 2815         | protein_coding |      |        |
| eukaryotic translation initiation factor 5A | [Source:HGNC                       |                         |              |                |      |        |
| Symbol;Acc:HGNC:3300]                       | -                                  | 11795                   | 15024        | 12123          | 8630 | 7798   |
| 12407                                       | 205.1862383                        | 252.8911414             | 267.9406167  |                |      |        |

|                        |                                                        |             |             |             |      |             |  |
|------------------------|--------------------------------------------------------|-------------|-------------|-------------|------|-------------|--|
| 170.3509031            | 170.2755108                                            | 204.9365407 |             |             |      |             |  |
| ENSG00000280206        | 155.1399152                                            | 218.5938028 | 267.3730795 |             |      |             |  |
| 100.488944             | 136.9790194                                            | 63.83528935 | 213.7022658 |             |      |             |  |
| 100.4344176            | 1.092626294                                            | 0.003463309 | 0.033096962 |             |      |             |  |
| AC026401.3             | 16                                                     | 15701237    | 15702118    | +           |      | 882         |  |
| lincRNA                | novel transcript                                       | -           | 171         | 247         |      | 230         |  |
| 97                     | 120                                                    | 74          | 9.49415262  | 13.26950764 |      |             |  |
| 16.22430483            | 6.111040934                                            | 8.36296003  | 3.901163505 |             |      |             |  |
| ENSG00000204574        | 5243.910583                                            | 5638.304121 | 5109.150801 |             |      |             |  |
| 6313.192008            | 6872.922297                                            | 7389.366062 | 5330.455168 |             |      |             |  |
| 6858.493456            | -0.363620458                                           | 0.003466059 | 0.033104097 |             |      | ABCF1       |  |
| 6                      | 30571376                                               | 30597179    | +           | 4523        |      |             |  |
| protein_coding         | ATP binding cassette subfamily F member 1 [Source:HGNC |             |             |             |      |             |  |
| Symbol;Acc:HGNC:70]    | -                                                      | 5780        | 6371        | 4395        | 6094 | 6021        |  |
| 8566                   | 62.57918953                                            | 66.74326656 | 60.45596228 |             |      |             |  |
| 74.86656471            | 81.8256379                                             | 88.06077443 |             |             |      |             |  |
| ENSG00000074842        | 2595.645014                                            | 3554.140535 | 3432.837842 |             |      |             |  |
| 2434.525963            | 2313.803936                                            | 2287.718748 | 3194.207797 |             |      |             |  |
| 2345.349549            | 0.445540887                                            | 0.003467799 | 0.033104097 |             |      | MYDGF       |  |
| 19                     | 4641374                                                | 4670370     | -           | 1678        |      |             |  |
| myeloid derived        | growth factor [Source:HGNC Symbol;Acc:HGNC:16948]      |             |             |             |      |             |  |
| -                      | 2861                                                   | 4016        | 2953        | 2350        | 2027 | 2652        |  |
| 83.49386875            | 113.4039517                                            | 109.4909785 | 77.8194128  |             |      |             |  |
| 74.25217036            | 73.48734909                                            |             |             |             |      |             |  |
| ENSG00000249249        | 13.60876449                                            | 12.38993214 | 6.974949899 | 0           |      |             |  |
| 0                      | 0                                                      | 10.99121551 | 0           | 5.893482466 |      |             |  |
| 0.003478213            | 0.033185606                                            | AC010226.1  | 5           | 115602057   |      |             |  |
| 115620659              | +                                                      | 1218        | antisense   |             |      |             |  |
| uncharacterized        | LOC101927100 [Source:NCBI gene;Acc:101927100]          |             |             |             |      |             |  |
| 15                     | 14                                                     | 6           | 0           | 0           | 0    | 0.603076845 |  |
| 0.544637058            | 0.306486118                                            | 0           | 0           | 0           | 0    |             |  |
| ENSG00000116478        | 3161.769616                                            | 3129.342861 | 3653.711256 |             |      |             |  |
| 2433.489995            | 2688.213255                                            | 2444.719054 | 3314.941244 |             |      |             |  |
| 2522.140768            | 0.394208973                                            | 0.003482511 | 0.033208702 |             |      | HDAC1       |  |
| 1                      | 32292086                                               | 32333635    | +           | 3963        |      |             |  |
| protein_coding         | histone deacetylase 1 [Source:HGNC                     |             |             |             |      |             |  |
| Symbol;Acc:HGNC:4852]  | -                                                      | 3485        | 3536        | 3143        | 2349 | 2355        |  |
| 2834                   | 43.06330856                                            | 42.27801854 | 49.34318232 |             |      |             |  |
| 32.93601017            | 36.52701638                                            | 33.25115931 |             |             |      |             |  |
| ENSG00000169213        | 1282.852866                                            | 1005.354494 | 1155.5167   |             |      |             |  |
| 983.1341017            | 667.7727195                                            | 416.6546589 | 1147.90802  |             |      |             |  |
| 689.18716              | 0.736989165                                            | 0.003492675 | 0.033287673 |             |      | RAB3B       |  |
| 1                      | 51907956                                               | 51990764    | -           | 12844       |      |             |  |
| protein_coding         | "RAB3B, member RAS oncogene family [Source:HGNC        |             |             |             |      |             |  |
| Symbol;Acc:HGNC:9778]" | -                                                      | 1414        | 1136        | 994         | 949  | 585         |  |
| 483                    | 5.39110507                                             | 4.19087276  | 4.814962777 |             |      |             |  |
| 4.105612521            | 2.799644767                                            | 1.748549181 |             |             |      |             |  |
| ENSG00000177600        | 7598.22684                                             | 10954.47001 | 10470.56229 |             |      |             |  |
| 10799.97156            | 14790.30962                                            | 15241.96929 | 9674.419712 |             |      |             |  |
| 13610.75016            | -0.492563533                                           | 0.003495285 | 0.033294613 |             |      | RPLP2       |  |



|                                                                  |              |             |             |             |                |             |        |
|------------------------------------------------------------------|--------------|-------------|-------------|-------------|----------------|-------------|--------|
| 11                                                               | 809647       | 812880      | +           | 1955        | protein_coding |             |        |
| ribosomal protein lateral stalk subunit P2 [Source:HGNC          |              |             |             |             |                |             |        |
| Symbol;Acc:HGNC:10377]                                           | -            |             | 8375        | 12378       | 9007           | 10425       | 12957  |
| 17669                                                            | 209.7812832  |             | 300.0061499 |             | 286.6422787    |             |        |
| 296.3066139                                                      | 407.3850217  |             | 420.2388769 |             |                |             |        |
| ENSG00000136999                                                  | 935.3757459  |             | 845.1703712 |             | 689.3575484    |             |        |
| 1457.607672                                                      | 1007.937284  |             | 1186.128687 |             | 823.3012218    |             |        |
| 1217.224548                                                      | -0.56339928  |             | 0.003505599 |             | 0.033374891    |             | NOV    |
| 8                                                                | 119416306    |             | 119424353   |             | +              | 2673        |        |
| protein_coding nephroblastoma overexpressed [Source:HGNC         |              |             |             |             |                |             |        |
| Symbol;Acc:HGNC:7885]                                            | -            |             | 1031        | 955         | 593            | 1407        | 883    |
| 1375                                                             | 18.88810508  |             | 16.92898241 |             | 13.80265336    |             |        |
| 29.24874137                                                      | 20.30528572  |             | 23.91854501 |             |                |             |        |
| ENSG00000132768                                                  | 1785.469901  |             | 2248.772684 |             | 1536.813961    |             |        |
| 2099.908139                                                      | 3036.368263  |             | 2963.165121 |             | 1857.018849    |             |        |
| 2699.813841                                                      | -0.539389624 |             | 0.003516325 |             | 0.033458992    |             | DPH2   |
| 1                                                                | 43970000     |             | 43973369    |             | +              | 2930        |        |
| protein_coding DPH2 homolog [Source:HGNC Symbol;Acc:HGNC:3004] - |              |             |             |             |                |             |        |
| 1968                                                             | 2541         | 1322        | 2027        | 2660        | 3435           | 32.89168764 |        |
| 41.09258721                                                      |              | 28.07182717 |             | 38.44130937 |                | 55.80349199 |        |
| 54.51175184                                                      |              |             |             |             |                |             |        |
| ENSG00000138071                                                  | 7704.375203  |             | 6445.4197   |             | 8001.430026    |             |        |
| 6269.681331                                                      | 5412.954249  |             | 4949.822842 |             | 7383.741643    |             |        |
| 5544.152807                                                      | 0.413372406  |             | 0.003521624 |             | 0.033491401    |             | ACTR2  |
| 2                                                                | 65227753     |             | 65271253    |             | +              | 4347        |        |
| protein_coding ARP2 actin related protein 2 homolog [Source:HGNC |              |             |             |             |                |             |        |
| Symbol;Acc:HGNC:169]                                             | -            |             | 8492        | 7283        | 6883           | 6052        | 4742   |
| 5738                                                             | 95.66410855  |             | 79.38658325 |             | 98.51332465    |             |        |
| 77.36086602                                                      | 67.0531631   |             | 61.37647212 |             |                |             |        |
| ENSG00000104228                                                  | 901.8074602  |             | 1121.288859 |             | 1016.017702    |             |        |
| 1236.946383                                                      | 1430.289261  |             | 1620.036127 |             | 1013.038007    |             |        |
| 1429.09059                                                       | -0.496747376 |             | 0.003526759 |             | 0.033522218    |             | TRIM35 |
| 8                                                                | 27284887     |             | 27311319    |             | -              | 4269        |        |
| protein_coding tripartite motif containing 35 [Source:HGNC       |              |             |             |             |                |             |        |
| Symbol;Acc:HGNC:16285]                                           | -            |             | 994         | 1267        | 874            | 1194        | 1253   |
| 1878                                                             | 11.40220679  |             | 14.06296516 |             | 12.73773251    |             |        |
| 15.54140277                                                      | 18.04148478  |             | 20.45504556 |             |                |             |        |
| ENSG00000153071                                                  | 915.4162247  |             | 843.4003809 |             | 940.4557448    |             |        |
| 1215.191045                                                      | 1340.111406  |             | 1159.386877 |             | 899.7574501    |             |        |
| 1238.229776                                                      | -0.460621774 |             | 0.003533688 |             | 0.033555535    |             | DAB2   |
| 5                                                                | 39371675     |             | 39462300    |             | -              | 7717        |        |
| protein_coding "DAB2, clathrin adaptor protein [Source:HGNC      |              |             |             |             |                |             |        |
| Symbol;Acc:HGNC:2662]"                                           | -            |             | 1009        | 953         | 809            | 1173        | 1174   |
| 1344                                                             | 6.402820836  |             | 5.851548934 |             | 6.52239157     |             |        |
| 8.446203783                                                      | 9.351191629  |             | 8.09807485  |             |                |             |        |
| ENSG00000107104                                                  | 713.0992593  |             | 449.5775378 |             | 603.3331663    |             |        |
| 355.3371938                                                      | 351.5794831  |             | 405.4403513 |             | 588.6699878    |             |        |
| 370.785676                                                       | 0.665876409  |             | 0.003535457 |             | 0.033555535    |             | KANK1  |
| 9                                                                | 470291       | 746106      | +           | 11908       | protein_coding |             | KN     |
| motif and ankyrin repeat domains 1 [Source:HGNC                  |              |             |             |             |                |             |        |

|                                                          |                                               |              |                     |                      |                |             |
|----------------------------------------------------------|-----------------------------------------------|--------------|---------------------|----------------------|----------------|-------------|
| Symbol;Acc:HGNC:19309]                                   | -                                             | 786          | 508                 | 519                  | 343            | 308         |
| 470                                                      | 3.232305518                                   | 2.021395652  |                     | 2.711660897          |                |             |
| 1.600542968                                              | 1.589861347                                   | 1.835228099  |                     |                      |                |             |
| ENSG00000160124                                          | 344.7553671                                   | 350.4580806  |                     | 404.5470942          |                |             |
| 242.4166278                                              | 139.262003                                    | 242.4015717  |                     | 366.5868473          |                |             |
| 208.0267342                                              | 0.814181892                                   | 0.003535956  |                     | 0.033555535          |                | CCDC58      |
| 3                                                        | 122359591                                     | 122383231    |                     | -                    | 1746           |             |
| protein_coding                                           | coiled-coil domain containing 58              |              |                     |                      |                |             |
| [Source:HGNC                                             |                                               |              |                     |                      |                |             |
| Symbol;Acc:HGNC:31136]                                   | -                                             | 380          | 396                 | 348                  | 234            | 122         |
| 281                                                      | 10.65781165                                   | 10.74675597  |                     | 12.40057579          |                |             |
| 7.447039574                                              | 4.294997857                                   | 7.48329901   |                     |                      |                |             |
| ENSG00000230910                                          | 20.86677222                                   | 7.079961225  |                     | 5.812458249          |                | 0           |
| 0                                                        | 0                                             | 11.2530639   | 0                   | 5.927750142          |                |             |
| 0.00354443                                               | 0.033588211                                   | AL391807.1   |                     | 6                    | 68628117       |             |
| 68635161                                                 | -                                             | 5924         |                     | processed_transcript |                |             |
| uncharacterized                                          | LOC101928307                                  | [Source:NCBI | gene;Acc:101928307] | -                    |                |             |
| 23                                                       | 8                                             | 5            | 0                   | 0                    | 0              | 0.190125982 |
| 0.063988419                                              | 0.052512392                                   | 0            | 0                   | 0                    | 0              |             |
| ENSG00000104969                                          | 4453.694992                                   | 4262.136657  |                     | 4008.271209          |                |             |
| 4669.110007                                              | 5874.116948                                   | 6663.886625  |                     | 4241.367619          |                |             |
| 5735.704526                                              | -0.435475366                                  | 0.003544665  |                     | 0.033588211          |                | SGTA        |
| 19                                                       | 2754714                                       | 2783371      | -                   | 3801                 | protein_coding | small       |
| glutamine rich tetratricopeptide repeat containing alpha |                                               |              |                     |                      |                |             |
| [Source:HGNC                                             |                                               |              |                     |                      |                |             |
| Symbol;Acc:HGNC:10819]                                   | -                                             | 4909         | 4816                | 3448                 | 4507           | 5146        |
| 7725                                                     | 63.24465765                                   | 60.03645626  |                     | 56.43860025          |                |             |
| 65.88730321                                              | 83.21838293                                   | 94.4999626   |                     |                      |                |             |
| ENSG00000120656                                          | 657.7569503                                   | 829.2404585  |                     | 745.1571476          |                |             |
| 978.9902277                                              | 1063.870384                                   | 1116.254925  |                     | 744.0515188          |                |             |
| 1053.038512                                              | -0.501220719                                  | 0.003545095  |                     | 0.033588211          |                | TAF12       |
| 1                                                        | 28589323                                      | 28643085     |                     | -                    | 2337           |             |
| protein_coding                                           | TATA-box binding protein associated factor 12 |              |                     |                      |                |             |
| [Source:HGNC                                             |                                               |              |                     |                      |                |             |
| Symbol;Acc:HGNC:11545]                                   | -                                             | 725          | 937                 |                      |                | 641         |
| 945                                                      | 932                                           | 1294         | 15.19175605         | 18.99797533          |                |             |
| 17.06499494                                              | 22.4690722                                    | 24.51345691  |                     | 25.74581131          |                |             |
| ENSG00000128581                                          | 300.3000697                                   | 301.7833472  |                     | 344.0975284          |                |             |
| 477.5814762                                              | 587.8682915                                   | 424.4184103  |                     | 315.3936484          |                |             |
| 496.622726                                               | -0.654782464                                  | 0.003557516  |                     | 0.033687846          |                | IFT22       |
| 7                                                        | 101313367                                     | 101321823    |                     | -                    | 4132           |             |
| protein_coding                                           | intraflagellar transport 22                   |              |                     |                      |                |             |
| [Source:HGNC                                             |                                               |              |                     |                      |                |             |
| Symbol;Acc:HGNC:21895]                                   | -                                             | 331          | 341                 | 296                  | 461            | 515         |
| 492                                                      | 3.922801787                                   | 3.910393902  |                     | 4.456954955          |                |             |
| 6.199442784                                              | 7.661155482                                   | 5.536506423  |                     |                      |                |             |
| ENSG00000145362                                          | 528.0200622                                   | 508.872213   |                     | 444.0718103          |                |             |
| 848.4581973                                              | 768.2240004                                   | 609.885805   |                     | 493.6546952          |                |             |
| 742.1893342                                              | -0.586642732                                  | 0.003566462  |                     | 0.033742169          |                | ANK2        |
| 4                                                        | 112818109                                     | 113383740    |                     | +                    | 18224          |             |
| protein_coding                                           | ankyrin 2                                     |              |                     |                      |                |             |
| [Source:HGNC                                             |                                               |              |                     |                      |                |             |
| Symbol;Acc:HGNC:493]                                     | -                                             |              |                     |                      |                |             |
| 582                                                      | 575                                           | 382          | 819                 | 673                  | 707            | 1.563896334 |
| 1.495032311                                              | 1.304146868                                   | 2.497193746  |                     | 2.269962683          |                |             |
| 1.803876186                                              |                                               |              |                     |                      |                |             |

|                                                         |                                      |                  |                        |             |                |
|---------------------------------------------------------|--------------------------------------|------------------|------------------------|-------------|----------------|
| ENSG00000258441                                         | 472.6777533                          | 452.2325232      | 418.496994             |             |                |
| 683.7392066                                             | 561.6139795                          | 777.2377798      | 447.8024235            |             |                |
| 674.1969886                                             | -0.590780799                         | 0.003567439      | 0.033742169            |             |                |
| LINC00641                                               | 14                                   | 21200079         | 21206900               | -           | 5715           |
|                                                         | processed_transcript                 | long intergenic  | non-protein coding RNA |             |                |
| 641 [Source:HGNC Symbol;Acc:HGNC:27511]                 | -                                    | 521              | 511                    |             | 360            |
| 660                                                     | 492                                  | 901              | 4.464267113            | 4.236733105 |                |
| 3.919161071                                             | 6.41711385                           | 5.291712346      | 7.330600875            |             |                |
| ENSG00000162946                                         | 171.4704326                          | 169.9190694      | 191.8111222            |             |                |
| 77.69763712                                             | 95.88531357                          | 99.20349021      | 177.7335414            |             |                |
| 90.92881363                                             | 0.965487441                          | 0.003568975      | 0.033742169            |             | DISC1          |
| 1                                                       | 231626815                            | 232041272        | +                      | 12906       |                |
| protein_coding                                          | DISC1 scaffold protein [Source:HGNC  |                  |                        |             |                |
| Symbol;Acc:HGNC:2888]                                   | -                                    | 189              | 192                    | 165         | 75             |
| 115                                                     | 0.717131546                          | 0.704913793      | 0.795424805            |             | 84             |
| 0.322910113                                             | 0.400069078                          | 0.41432124       |                        |             |                |
| ENSG00000186960                                         | 782.9575836                          | 807.1155796      | 963.7055778            |             |                |
| 714.8182615                                             | 463.4456822                          | 474.4514749      | 851.2595803            |             |                |
| 550.9051395                                             | 0.627397619                          | 0.003573464      | 0.033766561            |             |                |
| LINC01551                                               | 14                                   | 28772704         | 28813453               | +           | 2772           |
|                                                         | lincRNA                              | long intergenic  | non-protein coding RNA | 1551        |                |
| [Source:HGNC Symbol;Acc:HGNC:19828]                     | -                                    | 863              | 912                    |             | 829            |
| 690                                                     | 406                                  | 550              | 15.24566081            | 15.58935164 |                |
| 18.60664841                                             | 13.83145628                          | 9.002853184      | 9.225724504            |             |                |
| ENSG00000166813                                         | 578.8261163                          | 606.2216799      | 607.9831329            |             |                |
| 353.2652568                                             | 364.1358932                          | 464.9624454      | 597.6769764            |             |                |
| 394.1211985                                             | 0.599066774                          | 0.003587192      | 0.033878187            |             | KIF7           |
| 15                                                      | 89608789                             | 89655451         | -                      | 5001        |                |
| protein_coding                                          | kinesin family member 7 [Source:HGNC |                  |                        |             |                |
| Symbol;Acc:HGNC:30497]                                  | -                                    | 638              | 685                    | 523         | 341            |
| 539                                                     | 6.247302102                          | 6.490231049      | 6.506563625            |             | 319            |
| 3.78886881                                              | 3.920858675                          | 5.011444543      |                        |             |                |
| ENSG00000125651                                         | 2948.565639                          | 4112.572477      | 3697.885938            |             |                |
| 3975.011115                                             | 5388.982921                          | 5858.181756      | 3586.341351            |             |                |
| 5074.058597                                             | -0.500747105                         | 0.003590297      | 0.033889416            |             | GTF2F1         |
| 19                                                      | 6379569                              | 6393981          | -                      | 3134        | protein_coding |
| general transcription factor IIF subunit 1 [Source:HGNC |                                      |                  |                        |             |                |
| Symbol;Acc:HGNC:4652]                                   | -                                    | 3250             | 4647                   | 3181        | 3837           |
| 6791                                                    | 50.78238017                          | 70.25870185      | 63.14973371            |             | 4721           |
| 68.03068607                                             | 92.59389825                          | 100.7548026      |                        |             |                |
| ENSG00000255197                                         | 9.07250966                           | 9.734946684      | 2.3249833              |             |                |
| 31.07905485                                             | 26.25431205                          | 62.11001126      | 7.044146548            |             |                |
| 39.81445938                                             | -2.481967506                         | 0.003592733      | 0.033894321            |             |                |
| AC090559.1                                              | 11                                   | 47383148         | 47409190               | -           | 1113           |
|                                                         | antisense                            | novel transcript |                        | -           | 10             |
| 2                                                       | 30                                   | 23               | 72                     | 0.439980591 | 0.468299789    |
| 0.111799968                                             | 1.497745881                          | 1.270223174      | 3.007934329            |             |                |
| ENSG00000167770                                         | 2384.255539                          | 2624.895624      | 2826.017201            |             |                |
| 2968.049738                                             | 3797.743312                          | 3810.276663      | 2611.722788            |             |                |
| 3525.356571                                             | -0.433057391                         | 0.003608253      | 0.034007845            |             | OTUB1          |

|                 |                                                                                        |             |       |             |             |
|-----------------|----------------------------------------------------------------------------------------|-------------|-------|-------------|-------------|
| 11              | 63985853                                                                               | 64001811    | +     | 5336        |             |
| protein_coding  | "OTU deubiquitinase, ubiquitin aldehyde binding 1 [Source:HGNC Symbol;Acc:HGNC:23077]" |             | -     | 2628        | 2966        |
| 2865            | 3327                                                                                   | 4417        |       | 24.11782966 | 26.33793773 |
| 28.34496888     | 29.83464325                                                                            | 38.32519208 |       | 38.48952899 |             |
| ENSG00000120837 | 648.6844407                                                                            | 546.0420095 |       | 554.508517  |             |
| 390.5601226     | 420.0689928                                                                            | 351.9567305 |       | 583.0783224 |             |
| 387.5286153     | 0.59072012                                                                             | 0.003608611 |       | 0.034007845 | NFYB        |
| 12              | 104117077                                                                              | 104138289   | -     | 4956        |             |
| protein_coding  | nuclear transcription factor Y subunit beta [Source:HGNC Symbol;Acc:HGNC:7805]         |             | NF-YB | 715         | 617         |
| 377             | 368                                                                                    | 408         |       | 7.064857845 | 5.899025957 |
| 5.988167336     | 4.226901195                                                                            | 4.564191745 |       | 3.827893828 |             |
| ENSG00000121957 | 1804.522171                                                                            | 1290.322933 |       | 1606.56346  |             |
| 1004.88944      | 420.0689928                                                                            | 371.7974285 |       | 1567.136188 |             |
| 598.9186204     | 1.387845466                                                                            | 0.003612866 |       | 0.034029808 | GPSM2       |
| 1               | 108875350                                                                              | 108934545   | +     | 9130        |             |
| protein_coding  | G protein signaling modulator 2 [Source:HGNC Symbol;Acc:HGNC:29501]                    |             | -     | 1989        | 1458        |
| 431             | 10.66823783                                                                            | 7.56681624  |       | 1382        | 970         |
| 5.903546663     | 2.477561258                                                                            | 2.195015093 |       | 9.417683957 |             |
| ENSG00000092847 | 1574.080426                                                                            | 1517.766688 |       | 1379.877588 |             |
| 1179.968116     | 1034.191596                                                                            | 1079.161446 |       | 1490.574901 |             |
| 1097.773719     | 0.441584542                                                                            | 0.003616547 |       | 0.034046357 | AG01        |
| 1               | 35869808                                                                               | 35930528    | +     | 13886       |             |
| protein_coding  | "argonaute 1, RISC catalytic component [Source:HGNC Symbol;Acc:HGNC:3262]"             |             | -     | 1735        | 1715        |
| 1251            | 6.118585057                                                                            | 5.852122444 |       | 1187        | 1139        |
| 4.557835081     | 4.010498857                                                                            | 4.18900778  |       | 906         |             |
| ENSG00000198542 | 864.6101706                                                                            | 782.3357154 |       | 1213.641282 |             |
| 763.5087807     | 575.3118814                                                                            | 428.7316055 |       | 953.5290561 |             |
| 589.1840892     | 0.694534893                                                                            | 0.003623734 |       | 0.034095869 | ITGBL1      |
| 13              | 101452593                                                                              | 101720856   | +     | 6174        |             |
| protein_coding  | integrin subunit beta like 1 [Source:HGNC Symbol;Acc:HGNC:6164]                        |             | -     | 953         | 884         |
| 497             | 7.558836631                                                                            | 6.784409923 |       | 1044        | 737         |
| 6.63304443      | 5.017776018                                                                            | 3.743008227 |       | 504         |             |
| ENSG00000203943 | 34.47553671                                                                            | 13.2749273  |       | 10.52060512 |             |
| 5.179842475     | 4.565967313                                                                            | 0           |       | 29.86672113 | 3.248603262 |
|                 | 3.230948793                                                                            | 0.003626704 |       | 0.034105674 | SAMD13      |
|                 | 84298366                                                                               | 84389957    | +     | 3455        | 1           |
|                 | sterile alpha motif domain containing 13 [Source:HGNC Symbol;Acc:HGNC:24582]           |             | -     | 38          | 15          |
|                 | 0                                                                                      | 0.53859737  |       | 36          | 5           |
| 0.080414432     | 0.071163828                                                                            | 0           |       | 0.648278018 | 4           |
| ENSG00000011198 | 939.0047498                                                                            | 894.7300998 |       | 928.8308283 |             |
| 1133.349533     | 1536.448001                                                                            | 1226.672722 |       | 920.855226  |             |
| 1298.823419     | -0.495715187                                                                           | 0.003638606 |       | 0.034199418 | ABHD5       |
| 3               | 43690108                                                                               | 43734371    | +     | 7549        |             |
| protein_coding  | abhydrolase domain containing 5 [Source:HGNC                                           |             |       |             |             |

|                                                                        |                                                   |                        |             |             |                |        |
|------------------------------------------------------------------------|---------------------------------------------------|------------------------|-------------|-------------|----------------|--------|
| Symbol;Acc:HGNC:21396]                                                 | -                                                 | 1035                   | 1011        | 799         | 1094           | 1346   |
| 1422                                                                   | 6.713973271                                       | 6.345826165            | 6.585127689 |             |                |        |
| 8.05267071                                                             | 10.95980923                                       | 8.758731015            |             |             |                |        |
| ENSG00000229163                                                        | 1.814501932                                       | 2.654985459            | 2.3249833   |             |                |        |
| 17.61146441                                                            | 13.69790194                                       | 36.2308399             | 2.264823564 |             |                |        |
| 22.51340208                                                            | -3.317965174                                      | 0.003661333            | 0.034394757 |             |                |        |
| NAP1L1P2                                                               | Y                                                 | 2929001                | 2931120     | -           | 1089           |        |
| processed_pseudogene                                                   | nucleosome assembly protein 1 like 1              |                        |             |             |                |        |
| pseudogene 2 [Source:HGNC                                              | Symbol;Acc:HGNC:38005]                            | -                      |             |             |                | 2      |
| 3                                                                      | 2                                                 | 17                     | 12          | 42          | 0.089935427    |        |
| 0.130532849                                                            | 0.114263879                                       | 0.867427298            | 0.677330647 |             |                |        |
| 1.793297854                                                            |                                                   |                        |             |             |                |        |
| ENSG00000196628                                                        | 1917.928542                                       | 1426.612187            | 2000.648129 |             |                |        |
| 1252.48591                                                             | 1413.166883                                       | 1055.870191            | 1781.729619 |             |                |        |
| 1240.507662                                                            | 0.522601685                                       | 0.003672117            | 0.03447775  |             |                | TCF4   |
| 18                                                                     | 55222331                                          | 55664787               | -           | 27828       |                |        |
| protein_coding                                                         | transcription factor 4 [Source:HGNC               |                        |             |             |                |        |
| Symbol;Acc:HGNC:11634]                                                 | bHLH                                              | 2114                   | 1612        | 1721        | 1209           | 1238   |
| 1224                                                                   | 3.720074795                                       | 2.74479228             | 3.847740036 |             |                |        |
| 2.41410608                                                             | 2.734550891                                       | 2.04517484             |             |             |                |        |
| ENSG00000125485                                                        | 585.1768731                                       | 697.3761807            | 562.6459585 |             |                |        |
| 742.7894108                                                            | 862.9678221                                       | 1261.178284            | 615.0663374 |             |                |        |
| 955.6451724                                                            | -0.63614488                                       | 0.003679475            | 0.034528505 |             |                | DDX31  |
| 9                                                                      | 132592997                                         | 132670401              | -           | 5546        |                |        |
| protein_coding                                                         | DEAD-box helicase 31 [Source:HGNC                 |                        |             |             |                |        |
| Symbol;Acc:HGNC:16715]                                                 | -                                                 | 645                    | 788         | 484         | 717            | 756    |
| 1462                                                                   | 5.695194138                                       | 6.732444673            | 5.429656345 |             |                |        |
| 7.18375205                                                             | 8.37894405                                        | 12.2574047             |             |             |                |        |
| ENSG00000101596                                                        | 2573.87099                                        | 1969.114216            | 2207.571643 |             |                |        |
| 1911.361873                                                            | 1227.103715                                       | 1541.535974            | 2250.185616 |             |                |        |
| 1560.000521                                                            | 0.528253731                                       | 0.00369671             | 0.034671842 |             |                | SMCHD1 |
| 18                                                                     | 2655738                                           | 2805017                | +           | 12435       | protein_coding |        |
| structural maintenance of chromosomes flexible hinge domain containing | 1 [Source:HGNC                                    | Symbol;Acc:HGNC:29090] | -           | 2837        | 2225           | 1899   |
| 1845                                                                   | 1075                                              | 1787                   | 11.17229076 | 8.478336833 |                |        |
| 9.50136543                                                             | 8.244467769                                       | 5.313859102            | 6.682050923 |             |                |        |
| ENSG00000140563                                                        | 273.9897917                                       | 230.0987398            | 365.0223781 |             |                |        |
| 171.9707702                                                            | 179.214217                                        | 75.91223598            | 289.7036365 |             |                |        |
| 142.3657411                                                            | 1.027644877                                       | 0.003703544            | 0.03471754  |             |                | MCTP2  |
| 15                                                                     | 94231538                                          | 94483952               | +           | 12978       |                |        |
| protein_coding                                                         | multiple C2 and transmembrane domain containing 2 |                        |             |             |                |        |
| [Source:HGNC                                                           | Symbol;Acc:HGNC:25636]                            | -                      | 302         | 260         | 314            |        |
| 166                                                                    | 157                                               | 88                     | 1.139535493 | 0.949274946 |                |        |
| 1.505319629                                                            | 0.710742625                                       | 0.743599763            | 0.315286896 |             |                |        |
| ENSG00000144134                                                        | 69.85832438                                       | 90.26950562            | 79.04943219 |             |                |        |
| 139.8557468                                                            | 157.5258723                                       | 189.78059              | 79.72575406 |             |                |        |
| 162.387403                                                             | -1.027095999                                      | 0.003707545            | 0.034722393 |             |                | RABL2A |
| 2                                                                      | 113627229                                         | 113643396              | +           | 6008        |                |        |
| protein_coding                                                         | "RAB, member of RAS oncogene family like 2A       |                        |             |             |                |        |
| [Source:HGNC                                                           | Symbol;Acc:HGNC:9799]"                            | -                      | 77          | 102         | 68             |        |

|                         |                         |                       |                       |                |              |
|-------------------------|-------------------------|-----------------------|-----------------------|----------------|--------------|
| 135                     | 138                     | 220                   | 0.627609465           | 0.804445615    |              |
| 0.704183485             | 1.248578603             |                       | 1.411875892           | 1.702643697    |              |
| ENSG0000048828          | 3204.410412             |                       | 2846.144412           | 3092.227789    |              |
| 2583.705426             | 2262.436803             |                       | 1929.723544           | 3047.594204    |              |
| 2258.621925             | 0.432514383             |                       | 0.003707988           | 0.034722393    |              |
| FAM120A 9               | 93451722                |                       | 93566107              | + 7204         |              |
| protein_coding          | family with             | sequence              | similarity            | 120A           | [Source:HGNC |
| Symbol;Acc:HGNC:13247]  | -                       | 3532                  | 3216                  | 2660           | 2494 1982    |
| 2237                    | 24.0090886              |                       | 21.1528445            | 22.97284483    |              |
| 19.23688677             | 16.91131216             |                       | 14.43854059           |                |              |
| ENSG00000159335         | 3729.708721             |                       | 4937.387959           | 5752.008684    |              |
| 3332.710648             | 3675.603687             |                       | 3413.462702           | 4806.368455    |              |
| 3473.925679             | 0.468182494             |                       | 0.003712481           | 0.034732454    | PTMS         |
| 12                      | 6765516                 | 6770952               | + 1475                | protein_coding |              |
| parathymosin            | [Source:HGNC            | Symbol;Acc:HGNC:9629] | -                     | 4111           | 5579         |
| 4948                    | 3217                    | 3220                  | 3957                  | 136.4847536    | 179.2217782  |
| 208.7106051             | 121.1911996             |                       | 134.1872373           | 124.7398013    |              |
| ENSG00000198554         | 1113.196935             |                       | 861.9852791           | 1059.029893    |              |
| 871.2495042             | 557.0480121             |                       | 518.4460662           | 1011.404036    |              |
| 648.9145275             | 0.640472992             |                       | 0.003712989           | 0.034732454    | WDHD1        |
| 14                      | 54938950                |                       | 55027105              | - 6385         |              |
| protein_coding          | WD repeat and           | HMG-box               | DNA binding           | protein 1      |              |
| [Source:HGNC            | Symbol;Acc:HGNC:23170]  | HMG                   | 1227                  | 974            | 911          |
| 841                     | 488                     | 601                   | 9.410492322           | 7.228105721    |              |
| 8.876961207             | 7.318922321             |                       | 4.697927179           | 4.376677925    |              |
| ENSG00000132603         | 3160.862365             |                       | 3653.259992           | 3242.189212    |              |
| 4407.009977             | 4290.867782             |                       | 4266.612718           | 3352.103856    |              |
| 4321.496826             | -0.366321204            |                       | 0.003718838           | 0.034768778    | NIP7         |
| 16                      | 69337996                |                       | 69343111              | + 4749         |              |
| protein_coding          | "NIP7, nucleolar        | pre-rRNA              | processing            | protein        |              |
| [Source:HGNC            | Symbol;Acc:HGNC:24328]" | -                     | 3484                  | 4128           | 2789         |
| 4254                    | 3759                    | 4946                  | 35.92565213           | 41.18736039    |              |
| 36.53870838             | 49.77455198             |                       | 48.65388411           | 48.42648649    |              |
| ENSG00000139613         | 1499.685847             |                       | 1408.027289           | 1498.451737    |              |
| 1204.83136              | 956.570152              |                       | 1050.694357           | 1468.721624    |              |
| 1070.698623             | 0.455697948             |                       | 0.003731157           | 0.034865525    |              |
| SMARCC2 12              | 56162983                |                       | 56189567              | - 8555         |              |
| protein_coding          | "SWI/SNF related,       | matrix                | associated,           | actin          | dependent    |
| regulator of            | chromatin               | subfamily             | c member 2            | [Source:HGNC   |              |
| Symbol;Acc:HGNC:11105]" | MYB                     | 1653                  | 1591                  | 1289           | 1163 838     |
| 1218                    | 9.461969052             |                       | 8.812042977           | 9.374319474    |              |
| 7.553908927             | 6.021037956             |                       | 6.62000462            |                |              |
| ENSG00000129245         | 1771.861137             |                       | 2037.258842           | 2042.497829    |              |
| 2010.814849             | 3127.687609             |                       | 3338.413105           | 1950.539269    |              |
| 2825.638521             | -0.534955338            |                       | 0.003739249           | 0.034922692    | FXR2         |
| 17                      | 7591230                 | 7614871               | - 4331                | protein_coding | FMR1         |
| autosomal               | homolog 2               | [Source:HGNC          | Symbol;Acc:HGNC:4024] | -              | 1953         |
| 2302                    | 1757                    | 1941                  | 2740                  | 3870           | 22.08222055  |
| 25.18509401             | 25.24006241             |                       | 24.90286965           | 38.8874745     |              |
| 41.54835172             |                         |                       |                       |                |              |

|                                    |                                                                                 |                |                |        |
|------------------------------------|---------------------------------------------------------------------------------|----------------|----------------|--------|
| ENSG0000006652                     | 1647.567754                                                                     | 1648.74597     | 1569.363727    |        |
| 1196.543612                        | 1183.727026                                                                     | 1274.980509    | 1621.892484    |        |
| 1218.417049                        | 0.412548898                                                                     | 0.003760918    | 0.035106529    | IFRD1  |
| 7                                  | 112422968                                                                       | 112481017      | + 7489         |        |
| protein_coding                     | interferon related developmental regulator 1                                    |                |                |        |
| [Source:HGNC Symbol;Acc:HGNC:5456] | -                                                                               | 1816           | 1863           | 1350   |
| 1155                               | 1037 1478                                                                       | 11.8746467     | 11.78733062    |        |
| 11.21545209                        | 8.569790345                                                                     | 8.511425184    | 9.176596197    |        |
| ENSG00000177426                    | 555.2375912                                                                     | 642.5064812    | 691.6825317    |        |
| 788.3720246                        | 1014.786235                                                                     | 939.4139203    | 629.808868     |        |
| 914.1907267                        | -0.538181592                                                                    | 0.003793334    | 0.035374311    | TGIF1  |
| 18                                 | 3411608 3459978                                                                 | + 8222         | protein_coding | TGFB   |
| induced factor homeobox 1          | [Source:HGNC Symbol;Acc:HGNC:11776]                                             |                |                |        |
| Homeobox                           | 612 726                                                                         | 595 761        | 889 1089       |        |
| 3.645042809                        | 4.18394136                                                                      | 4.502423473    | 5.143032017    |        |
| 6.646173106                        | 6.158591886                                                                     |                |                |        |
| ENSG00000188486                    | 7082.00104                                                                      | 7587.948443    | 8236.253339    |        |
| 6008.61727                         | 5874.116948                                                                     | 6107.484441    | 7635.400941    |        |
| 5996.739553                        | 0.34836225                                                                      | 0.003793604    | 0.035374311    | H2AFX  |
| 11                                 | 119093854                                                                       | 119095467      | - 1614         |        |
| protein_coding                     | H2A histone family member X [Source:HGNC                                        |                |                |        |
| Symbol;Acc:HGNC:4739]              | -                                                                               | 7806 8574      | 7085 5800      | 5146   |
| 7080                               | 236.8392625                                                                     | 251.7134311    | 273.1135019    |        |
| 199.6808914                        | 195.9808386                                                                     | 203.9673932    |                |        |
| ENSG0000015285                     | 63.50756762                                                                     | 134.5192633    | 183.6736807    |        |
| 47.65455077                        | 63.92354238                                                                     | 22.42861518    | 127.2335039    |        |
| 44.66890277                        | 1.514908411                                                                     | 0.003799177    | 0.03540468     | WAS    |
| X                                  | 48676596                                                                        | 48691427       | + 2381         |        |
| protein_coding                     | Wiskott-Aldrich syndrome [Source:HGNC                                           |                |                |        |
| Symbol;Acc:HGNC:12731]             | -                                                                               | 70 152         | 158 46         | 56     |
| 26                                 | 1.439684497                                                                     | 3.024897294    | 4.128616446    |        |
| 1.073520841                        | 1.445692712                                                                     | 0.507744199    |                |        |
| ENSG00000143153                    | 853.723159                                                                      | 643.3914763    | 581.2458249    |        |
| 575.9984832                        | 213.4589719                                                                     | 352.8193695    | 692.7868201    |        |
| 380.7589415                        | 0.863314538                                                                     | 0.00380235     | 0.03540468     | ATP1B1 |
| 1                                  | 169105697                                                                       | 169132722      | + 2962         |        |
| protein_coding                     | ATPase Na <sup>+</sup> /K <sup>+</sup> transporting subunit beta 1 [Source:HGNC |                |                |        |
| Symbol;Acc:HGNC:804]               | -                                                                               | 941 727        | 500 556        | 187    |
| 409                                | 15.55726512                                                                     | 11.6298951     | 10.50247839    |        |
| 10.43041963                        | 3.880644974                                                                     | 6.420506233    |                |        |
| ENSG00000150672                    | 8.165258694                                                                     | 5.309970919    | 19.76235805    | 0      |
| 0                                  | 0 11.07919589                                                                   | 0              | 5.898359852    |        |
| 0.003803604                        | 0.03540468                                                                      | DLG2 11        | 83455012       |        |
| 85627922                           | - 16709                                                                         | protein_coding | discs large    | MAGUK  |
| scaffold protein 2                 | [Source:HGNC Symbol;Acc:HGNC:2901]                                              |                |                | 9      |
| 6                                  | 17 0                                                                            | 0 0            | 0.026376717    |        |
| 0.017014815                        | 0.063300233                                                                     | 0 0            | 0              |        |
| ENSG00000160214                    | 1547.770148                                                                     | 1874.419734    | 1650.738143    |        |
| 1820.196646                        | 2540.96081                                                                      | 2937.285949    | 1690.976008    |        |
| 2432.814468                        | -0.524931018                                                                    | 0.003804867    | 0.03540468     | RRP1   |

|                                            |                                                       |             |             |                        |  |
|--------------------------------------------|-------------------------------------------------------|-------------|-------------|------------------------|--|
| 21                                         | 43789513                                              | 43805293    | +           | 4251                   |  |
| protein_coding                             | ribosomal RNA processing 1 [Source:HGNC               |             |             |                        |  |
| Symbol;Acc:HGNC:18785]                     | -                                                     | 1706 2118   | 1420 1757   | 2226                   |  |
| 3405                                       | 19.65244572                                           | 23.60811389 | 20.78280133 |                        |  |
| 22.96638813                                | 32.18706783                                           | 37.24406101 |             |                        |  |
| ENSG00000213015                            | 915.4162247                                           | 848.7103518 | 998.5803273 |                        |  |
| 701.350671                                 | 606.1321608                                           | 643.5287278 | 920.9023013 |                        |  |
| 650.3371865                                | 0.501115633                                           | 0.00381941  | 0.035521315 | ZNF580                 |  |
| 19                                         | 55635016                                              | 55643469    | +           | 2692                   |  |
| protein_coding                             | zinc finger protein 580 [Source:HGNC                  |             |             |                        |  |
| Symbol;Acc:HGNC:29473]                     | zf-C2H2                                               | 1009 959    | 859 677     | 531                    |  |
| 746                                        | 18.3545945                                            | 16.87990478 | 19.85294571 |                        |  |
| 13.97415824                                | 12.12458341                                           | 12.88530759 |             |                        |  |
| ENSG00000100991                            | 2084.86272                                            | 2314.262325 | 2650.480962 |                        |  |
| 2730.812953                                | 3373.108352                                           | 3485.061743 | 2349.868669 |                        |  |
| 3196.327683                                | -0.44431796                                           | 0.00382148  | 0.035521893 |                        |  |
| TRPC4AP 20                                 | 35002404                                              | 35092871    | -           | 3226                   |  |
| protein_coding                             | transient receptor potential cation channel subfamily |             |             |                        |  |
| C member 4 associated protein [Source:HGNC | Symbol;Acc:HGNC:16181]                                |             |             |                        |  |
| -                                          | 2298 2615                                             | 2280 2636   | 2955 4040   |                        |  |
| 34.88304152                                | 38.40906817                                           | 43.97211251 | 45.40389248 |                        |  |
| 56.30415984                                | 58.23016493                                           |             |             |                        |  |
| ENSG00000111863                            | 304.8363246                                           | 339.8381388 | 167.3987976 |                        |  |
| 438.2146733                                | 474.8606005                                           | 495.154812  | 270.691087  |                        |  |
| 469.4100286                                | -0.791041966                                          | 0.003827443 | 0.035558631 | ADTRP                  |  |
| 6                                          | 11712054                                              | 11807046    | -           | 4150                   |  |
| protein_coding                             | androgen dependent TFPI regulating protein            |             |             |                        |  |
| [Source:HGNC                               | Symbol;Acc:HGNC:21214]                                | -           | 336 384     | 144                    |  |
| 423                                        | 416 574                                               | 3.964787032 | 4.384393937 |                        |  |
| 2.158843906                                | 5.663753118                                           | 6.16158713  | 6.431241436 |                        |  |
| ENSG00000178741                            | 1245.655576                                           | 1505.376755 | 2148.284569 |                        |  |
| 1032.860589                                | 1244.226093                                           | 982.5458726 | 1633.105634 |                        |  |
| 1086.544185                                | 0.587525896                                           | 0.003858495 | 0.035803035 | COX5A                  |  |
| 15                                         | 74919791                                              | 74938168    | -           | 1411                   |  |
| protein_coding                             | cytochrome c oxidase subunit 5A [Source:HGNC          |             |             |                        |  |
| Symbol;Acc:HGNC:2267]                      | -                                                     | 1373 1701   | 1848 997    | 1090                   |  |
| 1139                                       | 47.65102062                                           | 57.12204417 | 81.48577487 |                        |  |
| 39.2627024                                 | 47.48395059                                           | 37.5342488  |             |                        |  |
| ENSG00000104427                            | 509.8750429                                           | 442.4975766 | 433.6093854 |                        |  |
| 362.5889732                                | 248.8452185                                           | 238.0883765 | 461.9940016 |                        |  |
| 283.1741894                                | 0.707133535                                           | 0.003859401 | 0.035803035 |                        |  |
| ZC2HC1A 8                                  | 78666047                                              | 78719765    | +           | 4181                   |  |
| protein_coding                             | zinc finger C2HC-type containing 1A [Source:HGNC      |             |             |                        |  |
| Symbol;Acc:HGNC:24277]                     | -                                                     | 562 500     | 373 350     | 218                    |  |
| 276                                        | 6.582408511                                           | 5.666518065 | 5.550543503 |                        |  |
| 4.651573851                                | 3.204967916                                           | 3.069445543 |             |                        |  |
| ENSG00000234769                            | 53.52780699                                           | 60.17967041 | 41.8496994  |                        |  |
| 110.848629                                 | 150.6769213                                           | 100.9287683 | 51.85239227 |                        |  |
| 120.8181062                                | -1.214938984                                          | 0.003859822 | 0.035803035 | WASH4P                 |  |
| 16                                         | 14381 18068                                           | -           | 1246        | unprocessed_pseudogene |  |



|                                                                |             |                      |                 |                  |             |       |
|----------------------------------------------------------------|-------------|----------------------|-----------------|------------------|-------------|-------|
| "WAS protein family homolog 4, pseudogene [Source:HGNC         |             |                      |                 |                  |             |       |
| Symbol;Acc:HGNC:14126]"                                        | -           | 59                   | 68              | 36               | 107         | 132   |
| 117                                                            | 2.318796589 | 2.585933255          | 1.797592738     |                  |             |       |
| 4.771751064                                                    | 6.511832922 | 4.366151866          |                 |                  |             |       |
| ENSG00000175806                                                | 584.2696221 | 703.5711467          | 811.4191716     |                  |             |       |
| 442.3585473                                                    | 503.3978962 | 456.336055           | 699.7533135     |                  |             |       |
| 467.3641662                                                    | 0.581758869 | 0.003867916          | 0.035859311     |                  |             | MSRA  |
| 8                                                              | 10054268    | 10428891             | +               | 4162             |             |       |
| protein_coding methionine sulfoxide reductase A [Source:HGNC   |             |                      |                 |                  |             |       |
| Symbol;Acc:HGNC:7377]"                                         | -           | 644                  | 795             | 698              | 427         | 441   |
| 529                                                            | 7.577264981 | 9.050894311          | 10.4342249      |                  |             |       |
| 5.700826749                                                    | 6.513041925 | 5.909960991          |                 |                  |             |       |
| ENSG00000117152                                                | 1252.913584 | 931.8998962          | 1299.665665     |                  |             |       |
| 978.9902277                                                    | 671.197195  | 365.7589552          | 1161.493048     |                  |             |       |
| 671.9821259                                                    | 0.790261236 | 0.003882027          | 0.035971277     |                  |             | RGS4  |
| 1                                                              | 163068775   | 163076802            | +               | 4836             |             |       |
| protein_coding regulator of G protein signaling 4 [Source:HGNC |             |                      |                 |                  |             |       |
| Symbol;Acc:HGNC:10000]"                                        | -           | 1381                 | 1053            | 1118             | 945         | 588   |
| 424                                                            | 13.98414988 | 10.31735846          | 14.38342648     |                  |             |       |
| 10.85819308                                                    | 7.473747034 | 4.07671717           |                 |                  |             |       |
| ENSG00000214460                                                | 0           | 0                    | 0               | 21.68834474      |             |       |
| 18.978059                                                      | 0           | 13.55546791          | -6.236713858    | 0.00388509       |             |       |
| 0.035980816                                                    | TPT1P6      | 6                    | 85427453        | 85427966         |             |       |
| -                                                              | 514         | processed_pseudogene | "tumor protein, |                  |             |       |
| translationally-controlled 1 pseudogene 6 [Source:HGNC         |             |                      |                 |                  |             |       |
| Symbol;Acc:HGNC:49297]"                                        | -           | 0                    | 0               | 0                | 0           | 19    |
| 22                                                             | 0           | 0                    | 0               | 2.272154413      |             |       |
| 1.990171854                                                    |             |                      |                 |                  |             |       |
| ENSG00000137699                                                | 14.51601546 | 4.424975766          | 13.9498998      | 0                |             |       |
| 0                                                              | 0           | 10.96363034          | 0               | 5.885965198      |             |       |
| 0.003895534                                                    | 0.03605866  | TRIM29               | 11              | 120111275        |             |       |
| 120185529                                                      | -           | 10218                | protein_coding  | tripartite motif |             |       |
| containing 29 [Source:HGNC Symbol;Acc:HGNC:17274]"             |             |                      |                 |                  |             |       |
| 5                                                              | 12          | 0                    | 0               | 0                | 0.076680117 | 16    |
| 0.023186252                                                    | 0.073067154 | 0                    | 0               | 0                |             |       |
| ENSG00000019505                                                | 4.53625483  | 50.44472373          | 30.2247829      | 0                |             |       |
| 5.707459141                                                    | 0           | 28.40192048          | 1.90248638      |                  |             |       |
| 3.963502901                                                    | 0.003913298 | 0.036204148          | SYT13           | 11               |             |       |
| 45240301                                                       | 45286319    | -                    | 5424            | protein_coding   |             |       |
| synaptotagmin 13 [Source:HGNC Symbol;Acc:HGNC:14962]"          |             |                      |                 |                  |             |       |
| 57                                                             | 26          | 0                    | 5               | 0                | 0.045141814 | 5     |
| 0.497945275                                                    | 0.298236308 | 0                    | 0.056662755     | 0                |             |       |
| ENSG00000134352                                                | 3534.649763 | 2806.319631          | 3260.789078     |                  |             |       |
| 2656.223221                                                    | 2378.86897  | 2022.888561          | 3200.586157     |                  |             |       |
| 2352.660251                                                    | 0.444280819 | 0.003923587          | 0.036280365     |                  |             | IL6ST |
| 5                                                              | 55935095    | 55994993             | -               | 9292             |             |       |
| protein_coding interleukin 6 signal transducer [Source:HGNC    |             |                      |                 |                  |             |       |
| Symbol;Acc:HGNC:6021]"                                         | -           | 3896                 | 3171            | 2805             | 2564        | 2084  |
| 2345                                                           | 20.53233921 | 16.17012889          | 18.78151023     |                  |             |       |
| 15.33277855                                                    | 13.7859238  | 11.73450202          |                 |                  |             |       |

|                                       |                                                       |                                               |                          |             |             |             |        |  |
|---------------------------------------|-------------------------------------------------------|-----------------------------------------------|--------------------------|-------------|-------------|-------------|--------|--|
| ENSG00000273893                       | 43.54804637                                           | 58.40968011                                   | 36.03724115              |             |             |             |        |  |
| 95.30910153                           | 120.9981338                                           | 114.730993                                    | 45.99832254              |             |             |             |        |  |
| 110.3460761                           | -1.257877501                                          | 0.003943731                                   | 0.036447577              |             |             |             |        |  |
| AL133520.1                            | 20                                                    | 46681676                                      | 46682375                 | -           |             | 700         |        |  |
|                                       | sense_intronic                                        | "novel transcript, sense intronic to SLC13A3" |                          |             |             |             |        |  |
| -                                     | 48                                                    | 66                                            | 31                       | 92          | 106         | 133         |        |  |
| 3.357931874                           | 4.467579982                                           | 2.755310203                                   | 7.303008918              |             |             |             |        |  |
| 9.307974513                           | 8.834553785                                           |                                               |                          |             |             |             |        |  |
| ENSG00000085733                       | 4418.312204                                           | 4770.123875                                   | 4275.644288              |             |             |             |        |  |
| 3739.846267                           | 3191.611152                                           | 3470.396879                                   | 4488.026789              |             |             |             |        |  |
| 3467.284766                           | 0.372297198                                           | 0.003968345                                   | 0.036653745              |             |             |             | CTTN   |  |
| 11                                    | 70398404                                              | 70436584                                      | +                        | 6949        |             |             |        |  |
| protein_coding                        | cortactin [Source:HGNC Symbol;Acc:HGNC:3338]          |                                               |                          |             |             | -           |        |  |
| 4870                                  | 5390                                                  | 3678                                          | 3610                     | 2796        | 4023        | 34.31905598 |        |  |
| 36.75300844                           | 32.93034342                                           | 28.86668638                                   | 24.73216958              |             |             |             |        |  |
| 26.91898863                           |                                                       |                                               |                          |             |             |             |        |  |
| ENSG00000141540                       | 4.53625483                                            | 19.46989337                                   | 12.78740815              |             |             |             |        |  |
| 55.94229872                           | 30.82027936                                           | 74.18695789                                   | 12.26451878              |             |             |             |        |  |
| 53.64984533                           | -2.131554779                                          | 0.003970183                                   | 0.036653745              |             |             |             | TTYH2  |  |
| 17                                    | 74213514                                              | 74262020                                      | +                        | 5375        |             |             |        |  |
| protein_coding                        | tweety family member 2 [Source:HGNC                   |                                               |                          |             |             |             |        |  |
| Symbol;Acc:HGNC:13877]                | -                                                     | 5                                             | 22                       | 11          | 54          | 27          |        |  |
| 86                                    | 0.045553339                                           | 0.193941457                                   | 0.127327163              |             |             |             |        |  |
| 0.558248204                           | 0.308768264                                           | 0.743962424                                   |                          |             |             |             |        |  |
| ENSG00000071205                       | 551.6085873                                           | 578.7868301                                   | 613.7955911              |             |             |             |        |  |
| 727.2498834                           | 1076.426794                                           | 795.3531997                                   | 581.3970029              |             |             |             |        |  |
| 866.3432924                           | -0.575047297                                          | 0.003994971                                   | 0.036859403              |             |             |             |        |  |
| ARHGAP10                              | 4                                                     | 147732063                                     | 148072780                | +           |             | 10759       |        |  |
| protein_coding                        | Rho GTPase activating protein 10 [Source:HGNC         |                                               |                          |             |             |             |        |  |
| Symbol;Acc:HGNC:26099]                | -                                                     | 608                                           | 654                      | 528         | 702         | 943         |        |  |
| 922                                   | 2.767326203                                           | 2.880263903                                   | 3.053295669              |             |             |             |        |  |
| 3.625577961                           | 5.387498291                                           | 3.984648637                                   |                          |             |             |             |        |  |
| ENSG00000271204                       | 0                                                     | 0                                             | 0                        | 10.35968495 | 12.55641011 |             |        |  |
| 8.626390453                           | 0                                                     | 10.51416184                                   | -5.868923559             |             |             |             |        |  |
| 0.003997459                           | 0.036859403                                           | AC016831.4                                    | 7                        | 130930209   |             |             |        |  |
| 130932206                             | -                                                     | 1998                                          | lincRNA novel transcript |             |             |             |        |  |
| -                                     | 0                                                     | 0                                             | 0                        | 10          | 11          | 10          | 0      |  |
| 0                                     | 0                                                     | 0.278109971                                   | 0.33841107               | 0.232720978 |             |             |        |  |
| ENSG00000127445                       | 1284.667368                                           | 1721.315573                                   | 2065.747662              |             |             |             |        |  |
| 968.6305427                           | 1227.103715                                           | 1250.826616                                   | 1690.576868              |             |             |             |        |  |
| 1148.853625                           | 0.556596355                                           | 0.003998711                                   | 0.036859403              |             |             |             | PIN1   |  |
| 19                                    | 9835257                                               | 9849682                                       | +                        | 4570        |             |             |        |  |
| protein_coding                        | "peptidylprolyl cis/trans isomerase, NIMA-interacting |                                               |                          |             |             |             |        |  |
| 1 [Source:HGNC Symbol;Acc:HGNC:8988]" | -                                                     | 1416                                          | 1945                     | 1777        |             |             |        |  |
| 935                                   | 1075                                                  | 1450                                          | 15.1731495               | 20.16646822 |             |             |        |  |
| 24.19235097                           | 11.36861226                                           | 14.4590455                                    | 14.75308417              |             |             |             |        |  |
| ENSG00000250251                       | 329.3321007                                           | 290.2784102                                   | 289.4604208              |             |             |             |        |  |
| 223.7691949                           | 148.3939377                                           | 145.7859987                                   | 303.0236439              |             |             |             |        |  |
| 172.6497104                           | 0.812479108                                           | 0.004002462                                   | 0.036874762              |             |             |             | PKD1P6 |  |
| 16                                    | 15125242                                              | 15154564                                      | -                        | 6015        |             |             |        |  |

|                                     |                                                                                                                   |              |             |             |             |        |
|-------------------------------------|-------------------------------------------------------------------------------------------------------------------|--------------|-------------|-------------|-------------|--------|
| transcribed_unprocessed_pseudogene  | "polycystin 1, transient receptor potential channel interacting pseudogene 6 [Source:HGNC Symbol;Acc:HGNC:30070]" |              |             |             |             |        |
|                                     | -                                                                                                                 | 363          | 328         | 249         | 216         | 130    |
|                                     | 169                                                                                                               | 2.955287092  | 2.583834263 | 2.57555342  |             |        |
| 1.995400897                         |                                                                                                                   | 1.328480184  | 1.306417806 |             |             |        |
| ENSG00000160345                     |                                                                                                                   | 48.99155216  | 46.01974796 | 47.66215765 |             |        |
| 78.73360561                         |                                                                                                                   | 106.15874    | 163.9014186 | 47.55781926 |             |        |
| 116.2645881                         |                                                                                                                   | -1.292131776 | 0.004012876 | 0.036944384 |             |        |
| C9orf116                            | 9                                                                                                                 | 135495181    | 135501734   | -           |             | 1864   |
|                                     | protein_coding chromosome 9 open reading frame 116                                                                |              |             |             |             |        |
| [Source:HGNC Symbol;Acc:HGNC:28435] |                                                                                                                   | -            | 54          | 52          |             | 41     |
|                                     | 76                                                                                                                | 93           | 190         | 1.418654158 | 1.321855178 |        |
| 1.36849998                          |                                                                                                                   | 2.265581699  | 3.066792558 | 4.739567481 |             |        |
| ENSG00000196961                     |                                                                                                                   | 3518.319246  | 3185.097556 | 3819.947562 |             |        |
| 2631.359977                         |                                                                                                                   | 2703.052649  | 2752.681193 | 3507.788121 |             |        |
| 2695.69794                          |                                                                                                                   | 0.379583384  | 0.004014196 | 0.036944384 |             | AP2A1  |
|                                     | 19                                                                                                                | 49766968     | 49807113    | +           | 8746        |        |
|                                     | protein_coding adaptor related protein complex 2 subunit alpha 1                                                  |              |             |             |             |        |
| [Source:HGNC Symbol;Acc:HGNC:561]   |                                                                                                                   | -            | 3878        | 3599        |             | 3286   |
|                                     | 2540                                                                                                              | 2368         | 3191        | 21.71335912 | 19.49839277 |        |
| 23.37571656                         |                                                                                                                   | 16.13750119  | 16.64253907 | 16.96478458 |             |        |
| ENSG00000257218                     |                                                                                                                   | 389.2106644  | 312.4032891 | 369.6723447 |             |        |
| 571.8546092                         |                                                                                                                   | 486.2755188  | 570.2044089 | 357.0954327 |             |        |
| 542.778179                          |                                                                                                                   | -0.605097452 | 0.004020474 | 0.036982922 |             | GATC   |
|                                     | 12                                                                                                                | 120446438    | 120463749   | +           | 4422        |        |
|                                     | protein_coding glutamyl-tRNA amidotransferase subunit C [Source:HGNC Symbol;Acc:HGNC:25068]                       |              |             |             |             |        |
|                                     | -                                                                                                                 | 429          | 353         | 318         | 552         | 426    |
|                                     | 661                                                                                                               | 4.750805357  | 3.782530233 | 4.474198299 |             |        |
| 6.936372107                         |                                                                                                                   | 5.921588455  | 6.950463058 |             |             |        |
| ENSG00000164258                     |                                                                                                                   | 655.0351974  | 774.370759  | 874.1937207 |             |        |
| 550.0992708                         |                                                                                                                   | 503.3978962  | 521.0339833 | 767.866559  |             |        |
| 524.8437168                         |                                                                                                                   | 0.548015953  | 0.004033201 | 0.037080715 |             | NDUFS4 |
|                                     | 5                                                                                                                 | 53560633     | 53683340    | +           | 1176        |        |
|                                     | protein_coding NADH:ubiquinone oxidoreductase subunit S4 [Source:HGNC Symbol;Acc:HGNC:7711]                       |              |             |             |             |        |
|                                     | -                                                                                                                 | 722          | 875         | 752         | 531         | 441    |
|                                     | 604                                                                                                               | 30.06481663  | 35.25552385 | 39.78481706 |             |        |
| 25.08991806                         |                                                                                                                   | 23.05040858  | 23.88144686 |             |             |        |
| ENSG00000113300                     |                                                                                                                   | 906.343715   | 839.8604003 | 977.6554776 |             |        |
| 628.8328764                         |                                                                                                                   | 705.4419498  | 584.0066337 | 907.9531976 |             |        |
| 639.4271533                         |                                                                                                                   | 0.506193929  | 0.00403765  | 0.037102333 |             | CNOT6  |
|                                     | 5                                                                                                                 | 180494412    | 180578405   | +           | 6586        |        |
|                                     | protein_coding CCR4-NOT transcription complex subunit 6 [Source:HGNC Symbol;Acc:HGNC:14099]                       |              |             |             |             |        |
|                                     | -                                                                                                                 | 999          | 949         | 841         | 607         | 618    |
|                                     | 677                                                                                                               | 7.428009413  | 6.827644918 | 7.944766105 |             |        |
| 5.121285747                         |                                                                                                                   | 5.767852011  | 4.779670523 |             |             |        |
| ENSG00000140406                     |                                                                                                                   | 1142.228966  | 1130.138811 | 1496.126753 |             |        |
| 785.2641191                         |                                                                                                                   | 763.658033   | 1029.99102  | 1256.164843 |             |        |
| 859.6377241                         |                                                                                                                   | 0.545480263  | 0.004047886 | 0.037177076 |             | TLNRD1 |
|                                     | 15                                                                                                                | 81000944     | 81005788    | +           | 4845        |        |
|                                     | protein_coding talin rod domain containing 1 [Source:HGNC                                                         |              |             |             |             |        |

|                        |                                                |                        |             |             |       |             |
|------------------------|------------------------------------------------|------------------------|-------------|-------------|-------|-------------|
| Symbol;Acc:HGNC:13519] | -                                              | 1259                   | 1277        | 1287        | 758   | 669         |
| 1194                   | 12.72508325                                    | 12.48888184            | 16.5269081  |             |       |             |
| 8.693356064            | 8.487498227                                    | 11.45886396            |             |             |       |             |
| ENSG00000204178        | 1103.217175                                    | 969.9546878            | 1109.017034 |             |       |             |
| 1319.823863            | 1583.249166                                    | 1446.645679            | 1060.729632 |             |       |             |
| 1449.906236            | -0.451056103                                   | 0.004053259            | 0.037207107 |             |       | MAC01       |
| 1                      | 25430858                                       | 25500209               | +           | 3979        |       |             |
| protein_coding         | macoilin 1 [Source:HGNC                        | Symbol;Acc:HGNC:25572] | -           |             |       |             |
| 1216                   | 1096                                           | 954                    | 1274        | 1387        | 1677  | 14.96539966 |
| 13.05157898            | 14.91699287                                    | 17.79129384            | 21.42643324 |             |       |             |
| 19.59702477            |                                                |                        |             |             |       |             |
| ENSG00000278535        | 263.1027801                                    | 263.7285556            | 209.248497  |             |       |             |
| 181.2944866            | 103.8757564                                    | 63.83528935            | 245.3599442 |             |       |             |
| 116.3351774            | 1.080079915                                    | 0.004073718            | 0.037375517 |             |       | DHRS11      |
| 17                     | 36591798                                       | 36600806               | +           | 5462        |       |             |
| protein_coding         | dehydrogenase/reductase 11 [Source:HGNC        |                        |             |             |       |             |
| Symbol;Acc:HGNC:28639] | -                                              | 290                    | 298         | 180         | 175   | 91          |
| 74                     | 2.600009804                                    | 2.58518132             | 2.050348363 |             |       |             |
| 1.780321336            | 1.02408748                                     | 0.629957197            |             |             |       |             |
| ENSG00000114544        | 1057.854626                                    | 1073.499121            | 1109.017034 |             |       |             |
| 1308.428209            | 1434.855228                                    | 1731.316564            | 1080.123594 |             |       |             |
| 1491.533334            | -0.466307028                                   | 0.004082639            | 0.037437943 |             |       |             |
| SLC41A3 3              | 126006355                                      | 126101561              | -           | 6592        |       |             |
| protein_coding         | solute carrier family 41 member 3 [Source:HGNC |                        |             |             |       |             |
| Symbol;Acc:HGNC:31046] | -                                              | 1166                   | 1213        | 954         | 1263  | 1257        |
| 2007                   | 8.661837567                                    | 8.719067564            | 9.004052584 |             |       |             |
| 10.64628764            | 11.72102087                                    | 14.15667272            |             |             |       |             |
| ENSG00000114062        | 1880.731252                                    | 1599.186242            | 1868.124081 |             |       |             |
| 2573.345741            | 2212.211163                                    | 2337.751813            | 1782.680525 |             |       |             |
| 2374.436239            | -0.413857734                                   | 0.004107181            | 0.037643484 |             |       | UBE3A       |
| 15                     | 25333728                                       | 25439056               | -           | 12813       |       |             |
| protein_coding         | ubiquitin protein ligase E3A [Source:HGNC      |                        |             |             |       |             |
| Symbol;Acc:HGNC:12496] | -                                              | 2073                   | 1807        | 1607        | 2484  | 1938        |
| 2710                   | 7.922772026                                    | 6.682419985            | 7.803184889 |             |       |             |
| 10.77240838            | 9.297160037                                    | 9.834436554            |             |             |       |             |
| ENSG00000165280        | 9237.629336                                    | 9221.649496            | 9942.791082 |             |       |             |
| 11657.75347            | 12196.84018                                    | 11690.48434            | 9467.356638 |             |       |             |
| 11848.35933            | -0.323703881                                   | 0.004110121            | 0.037650925 |             |       | VCP         |
| 9                      | 35056064                                       | 35073249               | -           | 5438        |       |             |
| protein_coding         | valosin containing protein [Source:HGNC        |                        |             |             |       |             |
| Symbol;Acc:HGNC:12666] | -                                              | 10182                  | 10420       | 8553        | 11253 | 10685       |
| 13552                  | 91.69012673                                    | 90.7935415             | 97.85569717 |             |       |             |
| 114.984992             | 120.7765677                                    | 115.876457             |             |             |       |             |
| ENSG00000138035        | 1326.400912                                    | 1037.214319            | 1079.954743 |             |       |             |
| 905.4364645            | 710.0079171                                    | 796.2158388            | 1147.856658 |             |       |             |
| 803.8867402            | 0.51384285                                     | 0.004149347            | 0.037990582 |             |       | PNPT1       |
| 2                      | 55634265                                       | 55693910               | -           | 5134        |       |             |
| protein_coding         | polyribonucleotide nucleotidyltransferase 1    |                        |             |             |       |             |
| [Source:HGNC           | Symbol;Acc:HGNC:23166]                         | -                      | 1462        | 1172        | 929   |             |
| 874                    | 622                                            | 923                    | 13.94505373 | 10.81678477 |       |             |

|                                     |                                                                |             |             |                |
|-------------------------------------|----------------------------------------------------------------|-------------|-------------|----------------|
| 11.25814133                         | 9.459487593                                                    | 7.447009032 | 8.359433645 |                |
| ENSG00000104897                     | 2161.071801                                                    | 2916.944025 | 2723.717936 |                |
| 2994.984919                         | 3674.462195                                                    | 4169.997145 | 2600.57792  |                |
| 3613.148086                         | -0.474679952                                                   | 0.004159762 | 0.038066236 | SF3A2          |
| 19                                  | 2236504                                                        | 2248679 +   | 3134        | protein_coding |
| splicing factor                     | 3a subunit 2 [Source:HGNC Symbol;Acc:HGNC:10766]               |             |             |                |
| -                                   | 2382                                                           | 3296        | 2343        | 2891           |
| 37.21957833                         | 49.83272677                                                    | 46.51362027 | 51.25793939 |                |
| 63.13487788                         | 71.71973432                                                    |             |             |                |
| ENSG00000223891                     | 109.7773669                                                    | 89.38451047 | 101.1367735 |                |
| 49.72648776                         | 43.37668947                                                    | 23.29125422 | 100.0995503 |                |
| 38.79814382                         | 1.373160193                                                    | 0.004177488 | 0.038208679 | OSER1-         |
| DT                                  | 20                                                             | 44210960    | 44226027    | + 2186         |
| lincRNA                             | OSER1 divergent transcript [Source:HGNC Symbol;Acc:HGNC:48585] |             |             |                |
| -                                   | 121                                                            | 101         | 87          | 48             |
| 2.710590402                         | 2.189261587                                                    | 2.476144252 | 1.220121622 |                |
| 1.068515433                         | 0.574307681                                                    |             |             |                |
| ENSG00000146701                     | 4435.549973                                                    | 4973.672761 | 5164.9504   |                |
| 5726.83384                          | 6829.545608                                                    | 6330.045314 | 4858.057711 |                |
| 6295.474921                         | -0.374011182                                                   | 0.004180239 | 0.038214082 | MDH2           |
| 7                                   | 76048051                                                       | 76067508    | + 3641      |                |
| protein_coding                      | malate dehydrogenase 2 [Source:HGNC                            |             |             |                |
| Symbol;Acc:HGNC:6971]               | -                                                              | 4889        | 5620        | 4443           |
| 7338                                | 65.75488793                                                    | 73.13783114 | 75.92109809 | 5983           |
| 84.36443437                         | 101.0056538                                                    | 93.71045501 |             |                |
| ENSG00000153015                     | 557.9593441                                                    | 614.1866363 | 691.6825317 |                |
| 457.8980747                         | 399.5221399                                                    | 396.8139608 | 621.2761707 |                |
| 418.0780585                         | 0.570835741                                                    | 0.004204357 | 0.03841471  | CWC27          |
| 5                                   | 64768930                                                       | 65018763    | + 3740      |                |
| protein_coding                      | CWC27 spliceosome associated protein homolog                   |             |             |                |
| [Source:HGNC Symbol;Acc:HGNC:10664] | -                                                              |             | 615         | 694            |
| 442                                 | 350                                                            | 460         | 8.052527138 | 8.792539116    |
| 9.898108501                         | 6.566934897                                                    | 5.752330128 | 5.718962484 |                |
| ENSG00000090097                     | 990.7180548                                                    | 1479.711896 | 1249.678524 |                |
| 666.1277422                         | 979.3999886                                                    | 843.6609863 | 1240.036158 |                |
| 829.7295724                         | 0.580010846                                                    | 0.004206891 | 0.038418012 | PCBP4          |
| 3                                   | 51957454                                                       | 51974016    | - 3738      |                |
| protein_coding                      | poly(rC) binding protein 4 [Source:HGNC                        |             |             |                |
| Symbol;Acc:HGNC:8652]               | -                                                              | 1092        | 1672        | 1075           |
| 978                                 | 14.30579591                                                    | 21.19451178 | 17.8927055  | 858            |
| 9.558367396                         | 14.10897133                                                    | 12.16551717 |             |                |
| ENSG00000089006                     | 1969.641847                                                    | 1840.789918 | 1576.338677 |                |
| 1520.801751                         | 1187.151501                                                    | 1149.897847 | 1795.590148 |                |
| 1285.950366                         | 0.482227795                                                    | 0.004210524 | 0.038431356 | SNX5           |
| 20                                  | 17941597                                                       | 17968980    | - 7953      |                |
| protein_coding                      | sorting nexin 5 [Source:HGNC Symbol;Acc:HGNC:14969]            |             |             |                |
| -                                   | 2171                                                           | 2080        | 1356        | 1468           |
| 13.36772567                         | 12.39249617                                                    | 10.60804989 | 10.25668734 |                |
| 8.038031745                         | 7.793457745                                                    |             |             |                |
| ENSG00000145604                     | 1171.260997                                                    | 1035.444329 | 859.0813293 |                |

|                         |                                                       |             |             |        |
|-------------------------|-------------------------------------------------------|-------------|-------------|--------|
| 764.5447492             | 704.300458                                            | 674.5837334 | 1021.928885 |        |
| 714.4763135             | 0.517392535                                           | 0.004214168 | 0.038444771 | SKP2   |
| 5                       | 36151989                                              | 36184319    | + 3837      |        |
| protein_coding          | S-phase kinase associated protein 2 [Source:HGNC      |             |             |        |
| Symbol;Acc:HGNC:10901]  | -                                                     | 1291 1170   | 739 738     | 617    |
| 782                     | 16.47643034                                           | 14.44842485 | 11.98283242 |        |
| 10.68751178             | 9.884181805                                           | 9.476456469 |             |        |
| ENSG00000272391         | 2593.830512                                           | 2361.167069 | 2445.882431 |        |
| 3147.272288             | 3093.442854                                           | 3281.478928 | 2466.960004 |        |
| 3174.06469              | -0.363688725                                          | 0.004224616 | 0.038514185 |        |
| POM121C 7               | 75416787                                              | 75486271    | - 8767      |        |
| protein_coding          | POM121 transmembrane nucleoporin C [Source:HGNC       |             |             |        |
| Symbol;Acc:HGNC:34005]  | -                                                     | 2859 2668   | 2104 3038   | 2710   |
| 3804                    | 15.96951889                                           | 14.41986716 | 14.93143595 |        |
| 19.25523426             | 19.0005269                                            | 20.17532409 |             |        |
| ENSG00000177311         | 3091.911292                                           | 2492.146351 | 3437.487809 |        |
| 2394.123192             | 2288.691115                                           | 1355.20594  | 3007.181817 |        |
| 2012.673416             | 0.579653642                                           | 0.004226222 | 0.038514185 | ZBTB38 |
| 3                       | 141324213                                             | 141449792   | + 14243     |        |
| protein_coding          | zinc finger and BTB domain containing 38 [Source:HGNC |             |             |        |
| Symbol;Acc:HGNC:26636]  | ZBTB                                                  | 3408 2816   | 2957 2311   | 2005   |
| 1571                    | 11.71727966                                           | 9.368231562 | 12.9168524  |        |
| 9.015929661             | 8.652871672                                           | 5.128681493 |             |        |
| ENSG00000139722         | 667.736711                                            | 1063.764174 | 850.9438877 |        |
| 1091.910794             | 1300.159192                                           | 1445.78304  | 860.8149242 |        |
| 1279.284342             | -0.571678845                                          | 0.004228308 | 0.038514185 | VPS37B |
| 12                      | 122865328                                             | 122896444   | - 5953      |        |
| protein_coding          | "VPS37B, ESCRT-I subunit [Source:HGNC                 |             |             |        |
| Symbol;Acc:HGNC:25754]" | -                                                     | 736 1202    | 732 1054    | 1139   |
| 1676                    | 6.054393099                                           | 9.567424108 | 7.650363048 |        |
| 9.838225483             | 11.76075497                                           | 13.09088929 |             |        |
| ENSG00000185414         | 946.2627575                                           | 903.5800513 | 760.269539  |        |
| 1109.522258             | 1211.12283                                            | 1326.738852 | 870.0374493 |        |
| 1215.794646             | -0.4821871                                            | 0.004238062 | 0.038582146 | MRPL30 |
| 2                       | 99181079                                              | 99197626    | + 2898      |        |
| protein_coding          | mitochondrial ribosomal protein L30 [Source:HGNC      |             |             |        |
| Symbol;Acc:HGNC:14036]  | -                                                     | 1043 1021   | 654 1071    | 1061   |
| 1538                    | 17.62441095                                           | 16.69374602 | 14.04061768 |        |
| 20.53539842             | 22.50424063                                           | 24.67680746 |             |        |
| ENSG00000105245         | 1024.286341                                           | 1363.777531 | 1097.392117 |        |
| 1330.183547             | 1870.905106                                           | 1810.679356 | 1161.818663 |        |
| 1670.589337             | -0.523689439                                          | 0.004240132 | 0.038582146 | NUMBL  |
| 19                      | 40665905                                              | 40690972    | - 5823      |        |
| protein_coding          | "NUMB like, endocytic adaptor protein [Source:HGNC    |             |             |        |
| Symbol;Acc:HGNC:8061]"  | -                                                     | 1129 1541   | 944 1284    | 1639   |
| 2099                    | 9.494581688                                           | 12.53955976 | 10.08630393 |        |
| 12.25265703             | 17.30133135                                           | 16.76087421 |             |        |
| ENSG00000164930         | 2083.048218                                           | 1791.23019  | 2175.021877 |        |
| 1655.477655             | 1451.977605                                           | 1353.480662 | 2016.433428 |        |
| 1486.978641             | 0.439353244                                           | 0.004249092 | 0.038627763 | FZD6   |

|                           |                                                      |             |                         |             |        |
|---------------------------|------------------------------------------------------|-------------|-------------------------|-------------|--------|
| 8                         | 103298433                                            | 103332866   | +                       | 4065        |        |
| protein_coding            | frizzled class receptor 6 [Source:HGNC               |             |                         |             |        |
| Symbol;Acc:HGNC:4044]     | -                                                    | 2296 2024   | 1871                    | 1598        | 1272   |
| 1569                      | 27.65922565                                          | 23.5926323  | 28.63650972             |             |        |
| 21.84380388               | 19.23419088                                          | 17.94706401 |                         |             |        |
| ENSG00000095015           | 509.8750429                                          | 429.2226493 | 412.6845357             |             |        |
| 319.0782964               | 240.8547757                                          | 295.0225535 | 450.594076              |             |        |
| 284.9852086               | 0.660553673                                          | 0.004249512 | 0.038627763             |             | MAP3K1 |
| 5                         | 56815574                                             | 56896152    | +                       | 7716        |        |
| protein_coding            | mitogen-activated protein kinase kinase kinase 1     |             |                         |             |        |
| [Source:HGNC              | Symbol;Acc:HGNC:6848]                                | -           | 562                     | 485         | 355    |
| 308                       | 211 342                                              | 3.566750905 | 2.978351564             |             |        |
| 2.862483426               | 2.218045961                                          | 1.680883432 | 2.060937897             |             |        |
| ENSG00000166435           | 315.7233362                                          | 319.4832503 | 408.0345691             |             |        |
| 475.5095392               | 511.388339                                           | 639.2155325 | 347.7470518             |             |        |
| 542.0378036               | -0.642987191                                         | 0.004252347 | 0.038633673             |             | XRRA1  |
| 11                        | 74807739                                             | 74949200    | -                       | 9086        |        |
| protein_coding            | X-ray radiation resistance associated 1 [Source:HGNC |             |                         |             |        |
| Symbol;Acc:HGNC:18868]    | -                                                    | 348 361     | 351                     | 459         | 448    |
| 741                       | 1.875578281                                          | 1.88261238  | 2.403483974             |             |        |
| 2.807061946               | 3.030767641                                          | 3.792071292 |                         |             |        |
| ENSG00000255327           | 8.165258694                                          | 10.61994184 | 12.78740815             |             | 0      |
| 0                         | 0                                                    | 10.52420289 | 0                       | 5.827509457 |        |
| 0.004260611               | 0.0386885                                            | AP003062.1  | 11                      | 134950708   |        |
| 134951568                 | +                                                    | 762         | lincRNA uncharacterized |             |        |
| LOC105369586 [Source:NCBI | gene;Acc:105369586]                                  | -           | 9                       | 12          |        |
| 11                        | 0 0                                                  | 0           | 0.578383935             | 0.746195654 |        |
| 0.898141079               | 0                                                    | 0           | 0                       |             |        |
| ENSG00000180573           | 237.6997531                                          | 176.9990306 | 223.1983968             |             |        |
| 311.826517                | 463.4456822                                          | 315.7258906 | 212.6323935             |             |        |
| 363.6660299               | -0.773622043                                         | 0.004262756 | 0.0386885               |             |        |
| HIST1H2AC                 | 6                                                    | 26124145    | 26139116                | +           | 1668   |
| protein_coding            | histone cluster 1 H2A family member c                |             |                         |             |        |
| [Source:HGNC              | Symbol;Acc:HGNC:4733]                                | -           | 262                     | 200         | 192    |
| 301                       | 406 366                                              | 7.691905297 | 5.681465714             |             |        |
| 7.161632461               | 10.02726501                                          | 14.96157615 | 10.20272209             |             |        |
| ENSG00000105053           | 643.2409349                                          | 563.7419125 | 742.8321643             |             |        |
| 861.9257878               | 942.8722501                                          | 984.2711507 | 649.9383372             |             |        |
| 929.6897295               | -0.517856595                                         | 0.004267921 | 0.038715512             |             | VRK3   |
| 19                        | 49976467                                             | 50025946    | -                       | 9796        |        |
| protein_coding            | vaccinia related kinase 3 [Source:HGNC               |             |                         |             |        |
| Symbol;Acc:HGNC:18996]    | -                                                    | 709 637     | 639                     | 832         | 826    |
| 1141                      | 3.544264643                                          | 3.081180188 | 4.058438118             |             |        |
| 4.719397884               | 5.182969236                                          | 5.415865696 |                         |             |        |
| ENSG00000120694           | 10881.56809                                          | 10105.75965 | 9410.369906             |             |        |
| 12683.36228               | 13148.84437                                          | 12497.91449 | 10132.56588             |             |        |
| 12776.70705               | -0.334403464                                         | 0.004281429 | 0.038818141             |             | HSPH1  |
| 13                        | 31134974                                             | 31162388    | -                       | 8390        |        |
| protein_coding            | heat shock protein family H (Hsp110) member 1        |             |                         |             |        |
| [Source:HGNC              | Symbol;Acc:HGNC:16969]                               | -           | 11994                   | 11419       | 8095   |

|                         |                                                      |        |              |             |       |
|-------------------------|------------------------------------------------------|--------|--------------|-------------|-------|
| 12243                   | 11519                                                | 14488  | 70.0052752   | 64.49002614 |       |
| 60.02908711             | 81.08451667                                          |        | 84.39178592  | 80.29296483 |       |
| ENSG00000163900         | 567.0318537                                          |        | 700.0311661  | 576.5958583 |       |
| 738.6455369             | 1005.654301                                          |        | 967.0183698  | 614.5529594 |       |
| 903.7727357             | -0.555896219                                         |        | 0.00428524   | 0.038832796 |       |
| TMEM41A 3               | 185476496                                            |        | 185499057    | -           | 8668  |
| protein_coding          | transmembrane protein 41A                            |        | [Source:HGNC |             |       |
| Symbol;Acc:HGNC:30544]  | -                                                    | 625    | 791          | 496         | 713   |
| 1121                    | 3.530935613                                          |        | 4.323983437  | 3.560160853 | 881   |
| 4.570699513             | 6.247472685                                          |        | 6.013367251  |             |       |
| ENSG00000134986         | 671.3657148                                          |        | 514.182184   | 929.9933199 |       |
| 308.7186115             | 525.086241                                           |        | 430.4568836  | 705.1804062 |       |
| 421.4205787             | 0.742006516                                          |        | 0.004295263  | 0.038903693 | NREP  |
| 5                       | 111662621                                            |        | 111997464    | -           | 9337  |
| protein_coding          | neuronal regeneration related protein                |        | [Source:HGNC |             |       |
| Symbol;Acc:HGNC:16834]  | -                                                    | 740    | 581          | 800         | 298   |
| 499                     | 3.881084018                                          |        | 2.948459824  | 5.330764229 | 460   |
| 1.773458168             | 3.028292584                                          |        | 2.48498748   |             |       |
| ENSG00000153815         | 1186.684264                                          |        | 922.1649496  | 1682.125417 |       |
| 967.5945742             | 744.252672                                           |        | 736.6937447  | 1263.65821  |       |
| 816.1803303             | 0.62978724                                           |        | 0.004318314  | 0.039089008 | CMIP  |
| 16                      | 81445170                                             |        | 81711762     | +           | 12715 |
| protein_coding          | c-Maf inducing protein                               |        | [Source:HGNC |             |       |
| Symbol;Acc:HGNC:24319]  | -                                                    | 1308   | 1042         | 1447        | 934   |
| 854                     | 5.037558042                                          |        | 3.883093029  | 7.080419887 | 652   |
| 4.081713853             | 3.151944715                                          |        | 3.123003884  |             |       |
| ENSG00000170322         | 1318.235654                                          |        | 1234.568239  | 1085.767201 |       |
| 1621.290695             | 1630.050331                                          |        | 1639.014186  | 1212.857031 |       |
| 1630.118404             | -0.425922256                                         |        | 0.004320143  | 0.039089008 | NFRKB |
| 11                      | 129863636                                            |        | 129895590    | -           | 6335  |
| protein_coding          | nuclear factor related to kappaB binding protein     |        | [Source:HGNC |             |       |
| Symbol;Acc:HGNC:7802]   | -                                                    | Others | 1453         | 1395        | 934   |
| 1565                    | 1428                                                 | 1900   | 11.23175648  | 10.4340768  |       |
| 9.172909391             | 13.72713062                                          |        | 13.85571521  | 13.94562555 |       |
| ENSG00000138162         | 407.3556837                                          |        | 388.5128722  | 416.1720107 |       |
| 298.3589265             | 152.959905                                           |        | 251.0279622  | 404.0135222 |       |
| 234.1155979             | 0.785191246                                          |        | 0.004327524  | 0.039128942 | TACC2 |
| 10                      | 121989174                                            |        | 122254545    | +           | 18844 |
| protein_coding          | transforming acidic coiled-coil containing protein 2 |        | [Source:HGNC |             |       |
| Symbol;Acc:HGNC:11523]  | -                                                    |        | 449          | 439         | 358   |
| 288                     | 134                                                  | 291    | 1.1668148    | 1.103869834 |       |
| 1.181998098             | 0.849241944                                          |        | 0.437098245  | 0.718043759 |       |
| ENSG00000111237         | 680.4382245                                          |        | 619.4966072  | 840.4814629 |       |
| 466.1858227             | 465.7286659                                          |        | 513.2702319  | 713.4720982 |       |
| 481.7282402             | 0.564951954                                          |        | 0.004328981  | 0.039128942 | VPS29 |
| 12                      | 110491097                                            |        | 110502117    | -           | 3211  |
| protein_coding          | "VPS29, retromer complex component                   |        | [Source:HGNC |             |       |
| Symbol;Acc:HGNC:14340]" | -                                                    | 750    | 700          | 723         | 450   |
| 595                     | 11.43798813                                          |        | 10.32961596  | 14.00892591 | 408   |
| 7.787252411             | 7.810291043                                          |        | 8.61603944   |             |       |



|                         |                                                   |              |             |        |
|-------------------------|---------------------------------------------------|--------------|-------------|--------|
| ENSG00000197324         | 2636.471307                                       | 2755.874907  | 3674.636105 |        |
| 2181.74965              | 2414.255217                                       | 1971.130218  | 3022.32744  |        |
| 2189.045028             | 0.465204722                                       | 0.004337348  | 0.03917289  | LRP10  |
| 14                      | 22871613                                          | 22881580     | + 7112      |        |
| protein_coding          | LDL receptor related protein 10                   | [Source:HGNC |             |        |
| Symbol;Acc:HGNC:14553]  | -                                                 | 2906 3114    | 3161 2106   | 2115   |
| 2285                    | 20.00932994                                       | 20.74690418  | 27.65283068 |        |
| 16.45427163             | 18.27957036                                       | 14.93913578  |             |        |
| ENSG00000139644         | 10154.86006                                       | 10478.34261  | 11300.58133 |        |
| 13553.57582             | 13943.32268                                       | 12679.93133  | 10644.59467 |        |
| 13392.27661             | -0.331304734                                      | 0.004338272  | 0.03917289  | TMBIM6 |
| 12                      | 49707725                                          | 49764934     | + 6186      |        |
| protein_coding          | transmembrane BAX inhibitor motif containing 6    | [Source:HGNC |             |        |
| Symbol;Acc:HGNC:11723]  | -                                                 | 11193 11840  |             | 9721   |
| 13083                   | 12215 14699                                       | 88.60643667  | 90.691843   |        |
| 97.77050853             | 117.519374                                        | 121.3754675  | 110.4864176 |        |
| ENSG00000142634         | 3402.191122                                       | 3856.808877  | 5167.275384 |        |
| 2720.453268             | 3250.968727                                       | 2974.379428  | 4142.091794 |        |
| 2981.933807             | 0.473813066                                       | 0.004341607  | 0.039182999 | EFHD2  |
| 1                       | 15409895                                          | 15430343     | + 2531      |        |
| protein_coding          | EF-hand domain family member D2                   | [Source:HGNC |             |        |
| Symbol;Acc:HGNC:28670]  | -                                                 | 3750 4358    | 4445 2626   | 2848   |
| 3448                    | 72.5550768                                        | 81.58710472  | 109.2663578 |        |
| 57.65203216             | 69.16640447                                       | 63.34409418  |             |        |
| ENSG00000182923         | 822.8766261                                       | 684.1012534  | 695.1700066 |        |
| 498.300846              | 568.4629304                                       | 418.379937   | 734.0492954 |        |
| 495.0479045             | 0.570003238                                       | 0.004357639  | 0.039300446 | CEP63  |
| 3                       | 134485721                                         | 134575017    | + 10385     |        |
| protein_coding          | centrosomal protein 63                            | [Source:HGNC |             |        |
| Symbol;Acc:HGNC:25815]  | -                                                 | 907 773      | 598 481     | 498    |
| 485                     | 4.276903681                                       | 3.526951064  | 3.582626465 |        |
| 2.573656719             | 2.947611227                                       | 2.171532111  |             |        |
| ENSG00000147955         | 2347.058249                                       | 2181.513052  | 2181.996827 |        |
| 1657.549592             | 1725.935644                                       | 1766.684765  | 2236.856043 |        |
| 1716.723334             | 0.381812648                                       | 0.004359064  | 0.039300446 |        |
| SIGMAR1                 | 9 34634722                                        | 34637809     | - 2196      |        |
| protein_coding          | sigma non-opioid intracellular receptor 1         | [Source:HGNC |             |        |
| Symbol;Acc:HGNC:8157]   | -                                                 | 2587 2465    | 1877 1600   | 1512   |
| 2048                    | 57.68896887                                       | 53.18767773  | 53.17883066 |        |
| 40.48551709             | 42.32206166                                       | 43.36393     |             |        |
| ENSG00000103111         | 1556.842658                                       | 1383.247424  | 1505.426687 |        |
| 1797.405339             | 2054.685291                                       | 2058.256762  | 1481.838923 |        |
| 1970.115797             | -0.4110649                                        | 0.004368649  | 0.039366805 | MON1B  |
| 16                      | 77190835                                          | 77202405     | + 6942      |        |
| protein_coding          | "MON1 homolog B, secretory trafficking associated | [Source:HGNC |             |        |
| Symbol;Acc:HGNC:25020]" | -                                                 | 1716 1563    |             | 1295   |
| 1735                    | 1800 2386                                         | 12.10490423  | 10.66843731 |        |
| 11.60625226             | 13.88759086                                       | 15.93805261  | 15.98147457 |        |
| ENSG00000138185         | 176.0066874                                       | 161.954113   | 112.76169   |        |
| 225.8411319             | 325.325171                                        | 268.2807431  | 150.2408302 |        |

|                                                              |                                                       |             |             |                       |
|--------------------------------------------------------------|-------------------------------------------------------|-------------|-------------|-----------------------|
| 273.1490153                                                  | -0.858684005                                          | 0.00438096  | 0.039457636 | ENTPD1                |
| 10                                                           | 95711779                                              | 95869695    | + 6975      |                       |
| protein_coding                                               | ectonucleoside triphosphate diphosphohydrolase 1      |             |             |                       |
| [Source:HGNC Symbol;Acc:HGNC:3363]                           | -                                                     | 194         | 183         | 97                    |
| 218                                                          | 285                                                   | 311         | 1.36202852  | 1.243178007           |
| 0.865235578                                                  | 1.736698085                                           | 2.511585738 | 2.073228619 |                       |
| ENSG00000166086                                              | 1112.289684                                           | 1085.004058 | 1246.191049 |                       |
| 761.4368438                                                  | 893.7881015                                           | 837.622513  | 1147.828264 |                       |
| 830.9491527                                                  | 0.465762887                                           | 0.004387663 | 0.0394979   | JAM3                  |
| 11                                                           | 134068925                                             | 134152001   | + 5451      |                       |
| protein_coding                                               | junctional adhesion molecule 3 [Source:HGNC           |             |             |                       |
| Symbol;Acc:HGNC:15532]                                       | -                                                     | 1226        | 1226        | 783                   |
| 971                                                          | 11.01394673                                           | 10.65714142 | 12.23560505 |                       |
| 7.492438739                                                  | 8.829435538                                           | 8.282740709 |             |                       |
| ENSG00000087008                                              | 456.3472359                                           | 587.6367817 | 535.9086506 |                       |
| 796.6597726                                                  | 757.9505739                                           | 731.5179104 | 526.6308894 |                       |
| 762.0427523                                                  | -0.532983706                                          | 0.004395072 | 0.039525782 | ACOX3                 |
| 4                                                            | 8366282                                               | 8440723     | - 3846      | protein_coding "acyl- |
| CoA oxidase 3, pristanoyl [Source:HGNC Symbol;Acc:HGNC:121]" | -                                                     |             |             | -                     |
| 503                                                          | 664                                                   | 461         | 769         | 664                   |
| 8.180601553                                                  | 7.457589809                                           | 11.11038487 | 10.61221792 |                       |
| 10.25221229                                                  |                                                       |             |             |                       |
| ENSG00000183741                                              | 1588.596441                                           | 2114.253421 | 1714.675184 |                       |
| 2410.698688                                                  | 2027.289487                                           | 3653.276357 | 1805.841682 |                       |
| 2697.088177                                                  | -0.579108989                                          | 0.004395229 | 0.039525782 | CBX6                  |
| 22                                                           | 38861450                                              | 38872314    | - 8030      |                       |
| protein_coding                                               | chromobox 6 [Source:HGNC Symbol;Acc:HGNC:1556]        |             |             | -                     |
| 1751                                                         | 2389                                                  | 1475        | 2327        | 1776                  |
| 14.09701122                                                  | 11.42834445                                           | 16.1024842  | 4235        | 10.67823033           |
| 24.52273401                                                  |                                                       |             |             | 13.59486115           |
| ENSG00000198836                                              | 2672.761346                                           | 2210.717892 | 2277.321142 |                       |
| 2037.750029                                                  | 1687.124922                                           | 1457.859987 | 2386.93346  |                       |
| 1727.578313                                                  | 0.466865529                                           | 0.004405457 | 0.039597623 | OPA1                  |
| 3                                                            | 193593144                                             | 193697823   | + 9052      |                       |
| protein_coding                                               | "OPA1, mitochondrial dynamin like GTPase [Source:HGNC |             |             |                       |
| Symbol;Acc:HGNC:8140]"                                       | -                                                     | 2946        | 2498        | 1959                  |
| 1690                                                         | 15.93737827                                           | 13.07598247 | 13.46470173 | 1478                  |
| 12.07457514                                                  | 10.03638353                                           | 8.681068387 |             |                       |
| ENSG00000267493                                              | 41.73354444                                           | 27.43484975 | 18.5998664  |                       |
| 3.107905485                                                  | 0                                                     | 6.901112362 | 29.25608686 | 3.336339282           |
| 3.093249392                                                  | 0.004421479                                           | 0.039711083 |             | CIRBP-AS1             |
| 19                                                           | 1267814                                               | 1270241     | - 994       | antisense             |
| antisense RNA 1 [Source:HGNC Symbol;Acc:HGNC:28588]          | -                                                     |             |             | CIRBP                 |
| 31                                                           | 16                                                    | 3           | 0           | 8                     |
| 1.477752662                                                  | 1.001475767                                           | 0.167705349 | 0           | 0.374226571           |
| ENSG00000154217                                              | 92.53959853                                           | 45.13475281 | 60.44956579 |                       |
| 98.41700702                                                  | 142.6864785                                           | 233.7751813 | 66.04130571 |                       |
| 158.2928889                                                  | -1.262508289                                          | 0.00442257  | 0.039711083 |                       |
| PITPNC1 17                                                   | 67377281                                              | 67697261    | + 7819      |                       |
| protein_coding                                               | phosphatidylinositol transfer protein cytoplasmic 1   |             |             |                       |

|                                     |                                                        |             |             |             |
|-------------------------------------|--------------------------------------------------------|-------------|-------------|-------------|
| [Source:HGNC Symbol;Acc:HGNC:21045] | -                                                      | 102         | 51          | 52          |
| 95                                  | 125                                                    | 271         | 0.638818732 | 0.309061853 |
| 0.413769979                         | 0.675125382                                            | 0.982666521 | 1.611569709 |             |
| ENSG00000106608                     | 1109.567931                                            | 1375.282468 | 1390.340013 |             |
| 1531.161435                         | 1836.660352                                            | 2024.613839 | 1291.730138 |             |
| 1797.478542                         | -0.477259575                                           | 0.004426195 | 0.039723472 | URGCP       |
| 7                                   | 43875894                                               | 43926411    | -           | 7830        |
| protein_coding                      | upregulator of cell proliferation [Source:HGNC         |             |             |             |
| Symbol;Acc:HGNC:30890]              | -                                                      | 1223        | 1554        | 1196        |
| 2347                                | 7.648801292                                            | 9.404066537 | 9.503339933 | 1609        |
| 10.48877371                         | 12.63111363                                            | 13.93741866 |             |             |
| ENSG00000149182                     | 1855.328225                                            | 2116.908406 | 2080.860053 |             |
| 2273.950846                         | 2890.257309                                            | 3025.275132 | 2017.698895 |             |
| 2729.827762                         | -0.436327047                                           | 0.004443022 | 0.039854267 |             |
| ARFGAP2                             | 11                                                     | 47164299    | 47177125    | -           |
| 5918                                |                                                        |             |             |             |
| protein_coding                      | ADP ribosylation factor GTPase activating protein 2    |             |             |             |
| [Source:HGNC Symbol;Acc:HGNC:13504] | -                                                      | 2045        | 2392        | 1790        |
| 2195                                | 2532                                                   | 3507        | 16.9218186  | 19.15193483 |
| 18.81849625                         | 20.60969702                                            | 26.2988102  | 27.55445485 |             |
| ENSG00000148339                     | 361.0858845                                            | 461.9674699 | 433.6093854 |             |
| 235.1648483                         | 265.967596                                             | 290.7093583 | 418.8875799 |             |
| 263.9472675                         | 0.665347191                                            | 0.00444611  | 0.039861758 |             |
| SLC25A25                            | 9                                                      | 128068201   | 128109245   | +           |
| 4936                                |                                                        |             |             |             |
| protein_coding                      | solute carrier family 25 member 25                     |             |             |             |
| [Source:HGNC Symbol;Acc:HGNC:20663] | -                                                      | 398         | 522         | 373         |
| 227                                 | 233                                                    | 337         | 3.94854057  | 5.010969886 |
| 4.701544244                         | 2.555422709                                            | 2.901537115 | 3.174576288 |             |
| ENSG00000132823                     | 582.4551202                                            | 615.9566266 | 709.1199064 |             |
| 807.0194575                         | 883.514675                                             | 1064.496582 | 635.8438844 |             |
| 918.3435715                         | -0.53191726                                            | 0.004448689 | 0.039864667 | OSER1       |
| 20                                  | 44196496                                               | 44210791    | -           | 1712        |
| protein_coding                      | oxidative stress responsive serine rich 1 [Source:HGNC |             |             |             |
| Symbol;Acc:HGNC:16105]              | -                                                      | 642         | 696         | 610         |
| 1234                                | 18.36368994                                            | 19.26335464 | 22.16832712 | 774         |
| 25.28399763                         | 27.78974493                                            | 33.51524647 |             |             |
| ENSG00000183648                     | 202.3169654                                            | 232.7537253 | 215.0609552 |             |
| 133.6399358                         | 90.17785443                                            | 126.8079397 | 216.7105486 |             |
| 116.8752433                         | 0.888726771                                            | 0.004452411 | 0.039873069 | NDUFB1      |
| 14                                  | 92116122                                               | 92121917    | -           | 2263        |
| protein_coding                      | NADH:ubiquinone oxidoreductase subunit B1 [Source:HGNC |             |             |             |
| Symbol;Acc:HGNC:7695]               | -                                                      | 223         | 263         | 185         |
| 147                                 | 4.825574142                                            | 5.506778845 | 5.086206881 | 129         |
| 3.167504204                         | 2.145803244                                            | 3.020395391 |             | 79          |
| ENSG00000163902                     | 6737.245673                                            | 7010.931603 | 7791.019038 |             |
| 6254.141804                         | 5401.539331                                            | 4013.859478 | 7179.732105 |             |
| 5223.180204                         | 0.45913626                                             | 0.004454134 | 0.039873069 | RPN1        |
| 3                                   | 128619970                                              | 128681075   | -           | 3992        |
| protein_coding                      | ribophorin I [Source:HGNC Symbol;Acc:HGNC:10381]       |             |             |             |
| -                                   | 7426                                                   | 7922        | 6702        | 6037        |
| 91.09469704                         | 94.03093321                                            | 104.4529566 | 84.03161047 | 4732        |
|                                     |                                                        |             |             | 4653        |

|                                      |                                                        |             |             |             |      |            |
|--------------------------------------|--------------------------------------------------------|-------------|-------------|-------------|------|------------|
| 72.86207977                          | 54.19678668                                            |             |             |             |      |            |
| ENSG00000137312                      | 2243.631639                                            | 2385.946933 | 3378.200735 |             |      |            |
| 1710.383985                          | 2214.494147                                            | 1635.56363  | 2669.259769 |             |      |            |
| 1853.480587                          | 0.526117767                                            | 0.004456413 | 0.03987329  |             |      | FLOT1      |
| 6                                    | 30727709                                               | 30742733    | -           | 3186        |      |            |
| protein_coding                       | flotillin 1 [Source:HGNC Symbol;Acc:HGNC:3757]         |             |             |             |      | -          |
| 2473                                 | 2696                                                   | 2906        | 1651        | 1940        | 1896 | 38.0108016 |
| 40.09595457                          | 56.74880035                                            | 28.7947522  | 37.42857723 |             |      |            |
| 27.67091878                          |                                                        |             |             |             |      |            |
| ENSG00000225697                      | 690.4179851                                            | 547.8119998 | 480.1090514 |             |      |            |
| 386.4162486                          | 234.0058248                                            | 414.0667417 | 572.7796788 |             |      |            |
| 344.829605                           | 0.730832616                                            | 0.00448905  | 0.040135866 |             |      |            |
| SLC26A6                              | 3                                                      | 48625723    | 48635493    | -           | 6373 |            |
| protein_coding                       | solute carrier family 26 member 6 [Source:HGNC         |             |             |             |      |            |
| Symbol;Acc:HGNC:14472]               | -                                                      | 761         | 619         | 413         | 373  | 205        |
| 480                                  | 5.847489112                                            | 4.60228142  | 4.031929965 |             |      |            |
| 3.25219784                           | 1.977230508                                            | 3.50209834  |             |             |      |            |
| ENSG00000167395                      | 738.5022863                                            | 739.855948  | 702.1449565 |             |      |            |
| 831.8827014                          | 1148.340779                                            | 1155.936321 | 726.834397  |             |      |            |
| 1045.3866                            | -0.524249569                                           | 0.004490298 | 0.040135866 |             |      | ZNF646     |
| 16                                   | 31074422                                               | 31084196    | +           | 8635        |      |            |
| protein_coding                       | zinc finger protein 646 [Source:HGNC                   |             |             |             |      |            |
| Symbol;Acc:HGNC:29004]               | zf-C2H2                                                | 814         | 836         | 604         | 803  | 1006       |
| 1340                                 | 4.616265156                                            | 4.587439781 | 4.351925412 |             |      |            |
| 5.167318689                          | 7.161153765                                            | 7.215617025 |             |             |      |            |
| ENSG00000247626                      | 280.3405485                                            | 476.1273924 | 297.5978624 |             |      |            |
| 537.6676489                          | 577.5948651                                            | 589.1824679 | 351.3552677 |             |      |            |
| 568.1483273                          | -0.691953335                                           | 0.00449471  | 0.040141137 |             |      | MARS2      |
| 2                                    | 197705369                                              | 197708387   | +           | 3019        |      |            |
| protein_coding                       | "methionyl-tRNA synthetase 2, mitochondrial            |             |             |             |      |            |
| [Source:HGNC Symbol;Acc:HGNC:25133]" | -                                                      |             | 309         | 538         |      | 256        |
| 519                                  | 506                                                    | 683         | 5.012149887 | 8.443949037 |      |            |
| 5.27574382                           | 9.55248333                                             | 10.30231356 | 10.51934282 |             |      |            |
| ENSG00000134779                      | 2249.075145                                            | 1967.344225 | 2251.746326 |             |      |            |
| 1744.570945                          | 1612.927953                                            | 1523.420554 | 2156.055232 |             |      |            |
| 1626.973151                          | 0.40620502                                             | 0.004495426 | 0.040141137 |             |      | TPGS2      |
| 18                                   | 36777647                                               | 36829216    | -           | 10571       |      |            |
| protein_coding                       | tubulin polyglutamylase complex subunit 2 [Source:HGNC |             |             |             |      |            |
| Symbol;Acc:HGNC:24561]               | -                                                      | 2479        | 2223        | 1937        | 1684 | 1413       |
| 1766                                 | 11.483893                                              | 9.96436966  | 11.40040801 |             |      |            |
| 8.851931775                          | 8.216246291                                            | 7.767936103 |             |             |      |            |
| ENSG00000171861                      | 366.5293903                                            | 515.9521743 | 339.4475618 |             |      |            |
| 478.6174446                          | 668.9142113                                            | 877.303909  | 407.3097088 |             |      |            |
| 674.9451883                          | -0.728259508                                           | 0.004498124 | 0.040144958 |             |      | MRM3       |
| 17                                   | 782273                                                 | 792509      | +           | 2065        |      |            |
| mitochondrial                        | rRNA methyltransferase 3 [Source:HGNC                  |             |             |             |      |            |
| Symbol;Acc:HGNC:18485]               | -                                                      | 404         | 583         | 292         | 462  | 586        |
| 1017                                 | 9.580540093                                            | 13.37749938 | 8.797709998 |             |      |            |
| 12.43179853                          | 17.44315019                                            | 22.8998119  |             |             |      |            |
| ENSG00000127526                      | 1936.980812                                            | 2229.302791 | 2102.947395 |             |      |            |

|                                                  |                                                 |             |                |        |
|--------------------------------------------------|-------------------------------------------------|-------------|----------------|--------|
| 2542.266686                                      | 2674.515353                                     | 3069.269723 | 2089.743666    |        |
| 2762.017254                                      | -0.402671719                                    | 0.004503935 | 0.040176558    |        |
| SLC35E1 19                                       | 16549831                                        | 16572382    | - 7257         |        |
| protein_coding                                   | solute carrier family 35 member E1 [Source:HGNC |             |                |        |
| Symbol;Acc:HGNC:20803]                           | -                                               | 2135 2519   | 1809 2454      | 2343   |
| 3558                                             | 14.40686345                                     | 16.44740874 | 15.5091605     |        |
| 18.79011677                                      | 19.84552195                                     | 22.79711231 |                |        |
| ENSG00000188229                                  | 8213.342995                                     | 10111.95462 | 9996.265697    |        |
| 10337.92961                                      | 14469.55041                                     | 13282.91602 | 9440.521104    |        |
| 12696.79868                                      | -0.427552802                                    | 0.00450913  | 0.040202624    | TUBB4B |
| 9                                                | 137241213                                       | 137243707   | + 2111         |        |
| protein_coding                                   | tubulin beta 4B class IVb [Source:HGNC          |             |                |        |
| Symbol;Acc:HGNC:20771]                           | -                                               | 9053 11426  | 8599 9979      | 12676  |
| 15398                                            | 210.006613                                      | 256.4675525 | 253.4349827    |        |
| 262.6702171                                      | 369.0977157                                     | 339.1619317 |                |        |
| ENSG00000138496                                  | 327.5175987                                     | 292.0484005 | 319.6852037    |        |
| 421.6391774                                      | 526.2277328                                     | 489.1163387 | 313.0837343    |        |
| 478.9944163                                      | -0.613568057                                    | 0.004533791 | 0.040402127    | PARP9  |
| 3                                                | 122527924                                       | 122564577   | - 8938         |        |
| protein_coding                                   | poly(ADP-ribose) polymerase family member 9     |             |                |        |
| [Source:HGNC Symbol;Acc:HGNC:24118]              | -                                               |             | 361 330        | 275    |
| 407                                              | 461 567                                         | 1.977859944 | 1.74944394     |        |
| 1.914252355                                      | 2.53026555                                      | 3.170355294 | 2.949672007    |        |
| ENSG00000139318                                  | 958.964271                                      | 934.5548817 | 1047.404977    |        |
| 1269.061406                                      | 1235.094158                                     | 1554.47556  | 980.3080431    |        |
| 1352.877041                                      | -0.465832586                                    | 0.004541606 | 0.040450845    | DUSP6  |
| 12                                               | 89347232                                        | 89353271    | - 4632         |        |
| protein_coding                                   | dual specificity phosphatase 6 [Source:HGNC     |             |                |        |
| Symbol;Acc:HGNC:3072]                            | -                                               | 1057 1056   | 901 1225       | 1082   |
| 1802                                             | 11.17468064                                     | 10.80243864 | 12.10216548    |        |
| 14.69533807                                      | 14.35840074                                     | 18.08911226 |                |        |
| ENSG00000108424                                  | 15646.45016                                     | 13382.89671 | 14597.40765    |        |
| 12846.00934                                      | 10811.0691                                      | 9471.776717 | 14542.2515     |        |
| 11042.95172                                      | 0.397187467                                     | 0.004545466 | 0.040450845    | KPNB1  |
| 17                                               | 47649476                                        | 47685505    | + 7678         |        |
| protein_coding                                   | karyopherin subunit beta 1 [Source:HGNC         |             |                |        |
| Symbol;Acc:HGNC:6400]                            | -                                               | 17246 15122 | 12557 12400    | 9471   |
| 10980                                            | 109.9939903                                     | 93.32275834 | 101.7523933    |        |
| 89.73990822                                      | 75.82197436                                     | 66.49442739 |                |        |
| ENSG00000111639                                  | 899.9929583                                     | 1282.357977 | 1365.927689    |        |
| 673.3795217                                      | 828.7230673                                     | 890.2434947 | 1182.759541    |        |
| 797.4486946                                      | 0.567824709                                     | 0.004546118 | 0.040450845    | MRPL51 |
| 12                                               | 6491886 6493841                                 | - 1551      | protein_coding |        |
| mitochondrial ribosomal protein L51 [Source:HGNC |                                                 |             |                |        |
| Symbol;Acc:HGNC:14044]                           | -                                               | 992 1449    | 1175 650       | 726    |
| 1032                                             | 31.32049072                                     | 44.26729946 | 47.13385       |        |
| 23.28700318                                      | 28.77214121                                     | 30.93847605 |                |        |
| ENSG00000143061                                  | 147.8819075                                     | 165.4940936 | 155.7738811    |        |
| 93.23716454                                      | 79.90442797                                     | 43.99459131 | 156.3832941    |        |
| 72.37872794                                      | 1.116127919                                     | 0.004558415 | 0.040539868    | IGSF3  |

|                        |                                                        |             |                 |          |     |  |
|------------------------|--------------------------------------------------------|-------------|-----------------|----------|-----|--|
| 1                      | 116574399                                              | 116667755   | -               | 7400     |     |  |
| protein_coding         | immunoglobulin superfamily member 3 [Source:HGNC       |             |                 |          |     |  |
| Symbol;Acc:HGNC:5950]  | -                                                      | 163 187     | 134 90          | 70       |     |  |
| 51                     | 1.078659985                                            | 1.197391932 | 1.126626404     |          |     |  |
| 0.675807229            | 0.581451748                                            | 0.320456787 |                 |          |     |  |
| ENSG00000161526        | 1558.65716                                             | 1662.905893 | 1927.411156     |          |     |  |
| 1975.59192             | 2496.442628                                            | 2566.35116  | 1716.324736     |          |     |  |
| 2346.128569            | -0.451556536                                           | 0.004565716 | 0.040584401     |          |     |  |
| SAP30BP 17             | 75667116                                               | 75708062    | +               | 8268     |     |  |
| protein_coding         | SAP30 binding protein [Source:HGNC                     |             |                 |          |     |  |
| Symbol;Acc:HGNC:30785] | -                                                      | 1718 1879   | 1658 1907       | 2187     |     |  |
| 2975                   | 10.17539729                                            | 10.76843902 | 12.47644639     |          |     |  |
| 12.81628832            | 16.25906904                                            | 16.7308313  |                 |          |     |  |
| ENSG00000180917        | 897.2712054                                            | 867.2952501 | 934.6432865     |          |     |  |
| 1108.48629             | 1219.113272                                            | 1385.398307 | 899.7365806     |          |     |  |
| 1237.665956            | -0.460804288                                           | 0.004582149 | 0.040696047     | CMTR2    |     |  |
| 16                     | 71281389                                               | 71289715    | -               | 7582     |     |  |
| protein_coding         | cap methyltransferase 2 [Source:HGNC                   |             |                 |          |     |  |
| Symbol;Acc:HGNC:25635] | -                                                      | 989 980     | 804 1070        | 1068     |     |  |
| 1606                   | 6.387651226                                            | 6.12447317  | 6.597495691     |          |     |  |
| 7.841732822            | 8.658343925                                            | 9.849014549 |                 |          |     |  |
| ENSG00000230202        | 602.4146414                                            | 769.9457832 | 791.6568136     |          |     |  |
| 896.1127481            | 1049.03099                                             | 1188.716604 | 721.3390794     |          |     |  |
| 1044.620114            | -0.535253383                                           | 0.004582999 | 0.040696047     |          |     |  |
| AL450405.1             | 6                                                      | 117998975   | 117999448       | +        | 474 |  |
| processed_pseudogene   | ribosomal protein L29 (RPL29)                          |             |                 |          |     |  |
| pseudogene             | -                                                      | 664 870     | 681 865         | 919 1378 |     |  |
| 68.59910052            | 86.9695758                                             | 89.38725832 | 101.4027678     |          |     |  |
| 119.1748269            | 135.1767168                                            |             |                 |          |     |  |
| ENSG00000174574        | 1485.169831                                            | 1315.102798 | 1372.902639     |          |     |  |
| 1842.987952            | 1691.690889                                            | 2061.707318 | 1391.058422     |          |     |  |
| 1865.462053            | -0.423757235                                           | 0.004585179 | 0.040696047     |          |     |  |
| AKIRIN1 1              | 38991223                                               | 39006059    | +               | 2741     |     |  |
| protein_coding         | akirin 1 [Source:HGNC Symbol;Acc:HGNC:25744]           |             |                 | -        |     |  |
| 1637                   | 1486 1181                                              | 1779 1482   | 2390 29.2461247 |          |     |  |
| 25.68835029            | 26.80696879                                            | 36.06442034 | 33.23429942     |          |     |  |
| 40.54337362            |                                                        |             |                 |          |     |  |
| ENSG00000152642        | 921.7669814                                            | 808.88557   | 911.3934535     |          |     |  |
| 669.2356477            | 635.8109483                                            | 566.7538527 | 880.6820016     |          |     |  |
| 623.9334829            | 0.497581611                                            | 0.004587693 | 0.040697945     | GPD1L    |     |  |
| 3                      | 32105689                                               | 32168713    | +               | 4802     |     |  |
| protein_coding         | glycerol-3-phosphate dehydrogenase 1 like [Source:HGNC |             |                 |          |     |  |
| Symbol;Acc:HGNC:28956] | -                                                      | 1016 914    | 784 646         | 557      |     |  |
| 657                    | 10.3609657                                             | 9.018835816 | 10.15782563     |          |     |  |
| 7.475192929            | 7.129850107                                            | 6.361715334 |                 |          |     |  |
| ENSG00000085978        | 756.6473056                                            | 745.1659189 | 687.0325651     |          |     |  |
| 879.5372522            | 1015.927727                                            | 1241.337586 | 729.6152632     |          |     |  |
| 1045.600855            | -0.519392714                                           | 0.00459052  | 0.040702613     |          |     |  |
| ATG16L1 2              | 233210051                                              | 233295674   | +               | 6047     |     |  |
| protein_coding         | autophagy related 16 like 1 [Source:HGNC               |             |                 |          |     |  |

|                        |                                                       |                        |                        |                |             |       |     |      |
|------------------------|-------------------------------------------------------|------------------------|------------------------|----------------|-------------|-------|-----|------|
| Symbol;Acc:HGNC:21498] | -                                                     | 834                    | 842                    | 591            | 849         | 890   |     |      |
| 1439                   | 6.75390217                                            | 6.597791145            | 6.080710942            |                |             |       |     |      |
| 7.801529684            | 9.04685018                                            | 11.06501083            |                        |                |             |       |     |      |
| ENSG00000105287        | 739.4095373                                           | 810.6555603            | 899.768537             |                |             |       |     |      |
| 988.3139441            | 1200.849403                                           | 1258.590367            | 816.6112115            |                |             |       |     |      |
| 1149.251238            | -0.493896741                                          | 0.004596149            | 0.040732106            |                |             | PRKD2 |     |      |
| 19                     | 46674275                                              | 46717127               | -                      | 5446           |             |       |     |      |
| protein_coding         | protein kinase D2 [Source:HGNC                        | Symbol;Acc:HGNC:17293] |                        |                |             |       |     |      |
| -                      | 815                                                   | 916                    | 774                    | 954            | 1052        | 1459  |     |      |
| 7.328391381            | 7.969742276                                           | 8.84240027             | 9.733808131            |                |             |       |     |      |
| 11.87368335            | 12.45686257                                           |                        |                        |                |             |       |     |      |
| ENSG00000205517        | 68.95107341                                           | 54.86969949            | 109.2742151            |                |             |       |     |      |
| 34.18696033            | 12.55641011                                           | 26.7418104             | 77.69832933            |                |             |       |     |      |
| 24.49506028            | 1.657484008                                           | 0.004602146            | 0.04076483             |                |             | RGL3  |     |      |
| 19                     | 11384341                                              | 11419342               | -                      | 4358           |             |       |     |      |
| protein_coding         | ral guanine nucleotide dissociation stimulator like 3 | [Source:HGNC           | Symbol;Acc:HGNC:30282] | -              | 76          | 62    | 94  |      |
| 33                     | 11                                                    | 31                     | 0.853994453            | 0.674110209    |             |       |     |      |
| 1.341984421            | 0.420764177                                           | 0.155150371            | 0.33075429             |                |             |       |     |      |
| ENSG00000258102        | 39.9190425                                            | 67.25963164            | 54.63710754            |                |             |       |     |      |
| 127.4241249            | 133.5545439                                           | 106.1046026            | 53.9385939             |                |             |       |     |      |
| 122.3610904            | -1.18051894                                           | 0.004607004            | 0.040775048            |                |             |       |     |      |
| MAP1LC3B2              | 12                                                    | 116548105              | 116576448              | +              |             | 1767  |     |      |
| protein_coding         | microtubule associated protein 1 light chain 3        | beta 2 [Source:HGNC    | Symbol;Acc:HGNC:34390] | -              | 44          | 76    |     |      |
| 47                     | 123                                                   | 117                    | 123                    | 1.219396125    | 2.037996734 |       |     |      |
| 1.654886279            | 3.86794781                                            | 4.07002121             | 3.236678627            |                |             |       |     |      |
| ENSG00000169136        | 849.1869042                                           | 1051.374242            | 856.756346             |                |             |       |     |      |
| 902.3285591            | 1777.302776                                           | 1623.486683            | 919.1058307            |                |             |       |     |      |
| 1434.372673            | -0.641808451                                          | 0.00460791             | 0.040775048            |                |             | ATF5  |     |      |
| 19                     | 49928702                                              | 49933935               | +                      | 2954           |             |       |     |      |
| protein_coding         | activating transcription factor 5 [Source:HGNC        | Symbol;Acc:HGNC:790]   | TF_bZIP                | 936            | 1188        | 737   | 871 | 1557 |
| 1882                   | 15.51650985                                           | 19.05602836            | 15.52257774            |                |             |       |     |      |
| 16.38399126            | 32.39854314                                           | 29.62375766            |                        |                |             |       |     |      |
| ENSG00000104967        | 41.73354444                                           | 38.93978674            | 120.8991316            |                |             |       |     |      |
| 20.7193699             | 14.83939377                                           | 0                      | 67.19082092            | 11.85292122    |             |       |     |      |
| 2.513955203            | 0.004611586                                           | 0.040783115            | NOVA2                  | 19             |             |       |     |      |
| 45933734               | 45973546                                              | -                      | 8684                   | protein_coding |             |       |     |      |
| NOVA                   | alternative splicing regulator 2 [Source:HGNC         | Symbol;Acc:HGNC:7887]  | -                      | 46             | 44          | 104   | 20  | 13   |
| 0                      | 0.259398046                                           | 0.240081835            | 0.745109964            |                |             |       |     |      |
| 0.127974141            | 0.092017599                                           | 0                      |                        |                |             |       |     |      |
| ENSG00000203446        | 17.23776835                                           | 16.81490791            | 8.137441549            |                |             |       |     |      |
| 58.01423571            | 41.09370581                                           | 57.79681603            | 14.0633726             |                |             |       |     |      |
| 52.30158585            | -1.885394583                                          | 0.004613433            | 0.040783115            |                |             |       |     |      |
| AC004988.1             | 7                                                     | 40538127               | 40546928               | -              |             | 1771  |     |      |
| antisense              | novel transcript                                      |                        |                        | -              | 19          | 19    |     |      |
| 7                      | 56                                                    | 36                     | 67                     | 0.525368129    | 0.508348423 |       |     |      |
| 0.245915739            | 1.757039437                                           | 1.249485728            | 1.759086759            |                |             |       |     |      |

|                                     |                                                       |             |             |             |           |
|-------------------------------------|-------------------------------------------------------|-------------|-------------|-------------|-----------|
| ENSG00000100644                     | 4304.905834                                           | 3141.732794 | 3719.97328  |             |           |
| 3128.624855                         | 2639.129107                                           | 2388.647516 | 3722.203969 |             |           |
| 2718.800493                         | 0.453335477                                           | 0.004618736 | 0.040809604 | HIF1A       |           |
| 14                                  | 61695513                                              | 61748259    | +           | 5151        |           |
| protein_coding                      | hypoxia inducible factor 1 subunit alpha [Source:HGNC |             |             |             |           |
| Symbol;Acc:HGNC:4910]               | Others                                                | 4745        | 3550        | 3200        | 3020 2312 |
| 2769                                | 45.11005436                                           | 32.6560193  | 38.65140408 |             |           |
| 32.57822637                         | 27.58948794                                           | 24.99553427 |             |             |           |
| ENSG00000039523                     | 1711.982573                                           | 1517.766688 | 1949.498497 |             |           |
| 1220.370887                         | 1357.233784                                           | 1232.711196 | 1726.415919 |             |           |
| 1270.105289                         | 0.44252821                                            | 0.004628012 | 0.040871142 | RIPOR1      |           |
| 16                                  | 67518418                                              | 67546788    | +           | 6729        |           |
| protein_coding                      | RH0 family interacting cell polarization regulator 1  |             |             |             |           |
| [Source:HGNC Symbol;Acc:HGNC:25836] | -                                                     | 1887        | 1715        | 1677        |           |
| 1178                                | 1189 1429                                             | 13.73251416 | 12.07647084 |             |           |
| 15.50562873                         | 9.727624677                                           | 10.8612219  | 9.874445533 |             |           |
| ENSG00000173486                     | 451.8109811                                           | 777.9107396 | 755.6195724 |             |           |
| 406.09965                           | 335.5985975                                           | 477.039392  | 661.780431  |             |           |
| 406.2458798                         | 0.702183705                                           | 0.004633645 | 0.040900468 | FKBP2       |           |
| 11                                  | 64241003                                              | 64244132    | +           | 1608        |           |
| protein_coding                      | FK506 binding protein 2 [Source:HGNC                  |             |             |             |           |
| Symbol;Acc:HGNC:3718]               | -                                                     | 498 879     | 650 392     | 294         |           |
| 553                                 | 15.16603249                                           | 25.90175979 | 25.14977817 |             |           |
| 13.54603103                         | 11.23850767                                           | 15.99079682 |             |             |           |
| ENSG00000112033                     | 1352.71119                                            | 1066.41916  | 1535.65147  |             |           |
| 784.2281506                         | 852.6943956                                           | 1073.985611 | 1318.260606 |             |           |
| 903.6360526                         | 0.543411329                                           | 0.004649114 | 0.041007483 | PPARD       |           |
| 6                                   | 35342558                                              | 35428191    | +           | 4457        |           |
| protein_coding                      | peroxisome proliferator activated receptor delta      |             |             |             |           |
| [Source:HGNC Symbol;Acc:HGNC:9235]  | THR-like                                              | 1491        | 1205        |             |           |
| 1321                                | 757 747                                               | 1245        | 16.38187821 | 12.81064079 |           |
| 18.44025958                         | 9.437680897                                           | 10.30208972 | 12.98846222 |             |           |
| ENSG00000136490                     | 541.6288267                                           | 754.0158705 | 886.9811289 |             |           |
| 300.4308635                         | 551.340553                                            | 467.5503625 | 727.541942  |             |           |
| 439.7739264                         | 0.725848862                                           | 0.004650405 | 0.041007483 | LIMD2       |           |
| 17                                  | 63695902                                              | 63701172    | -           | 4745        |           |
| protein_coding                      | LIM domain containing 2 [Source:HGNC                  |             |             |             |           |
| Symbol;Acc:HGNC:28142]              | -                                                     | 597 852     | 763 290     | 483         |           |
| 542                                 | 6.161221155                                           | 8.508045795 | 10.00449491 |             |           |
| 3.396048038                         | 6.25688646                                            | 5.311217516 |             |             |           |
| ENSG00000131067                     | 508.0605409                                           | 693.8362    | 607.9831329 |             |           |
| 360.5170362                         | 396.0976644                                           | 438.220635  | 603.2932913 |             |           |
| 398.2784452                         | 0.598447976                                           | 0.004659628 | 0.041055406 | GGT7        |           |
| 20                                  | 34844720                                              | 34872860    | -           | 2966        |           |
| protein_coding                      | gamma-glutamyltransferase 7 [Source:HGNC              |             |             |             |           |
| Symbol;Acc:HGNC:4259]               | -                                                     | 560 784     | 523 348     | 347         |           |
| 508                                 | 9.24582276                                            | 12.52481607 | 10.97077704 |             |           |
| 6.519587838                         | 7.191271547                                           | 7.963859394 |             |             |           |
| ENSG00000196141                     | 2744.434172                                           | 2152.308212 | 2566.781563 |             |           |
| 2165.174154                         | 1685.98343                                            | 1448.370957 | 2487.841316 |             |           |



|                                          |                                                      |             |             |             |                     |
|------------------------------------------|------------------------------------------------------|-------------|-------------|-------------|---------------------|
| 1766.509514                              | 0.494222052                                          | 0.004660481 | 0.041055406 |             |                     |
| SPATS2L 2                                | 200305881                                            | 200482263   | +           | 10437       |                     |
| protein_coding                           | spermatogenesis associated serine rich 2 like        |             |             |             |                     |
| [Source:HGNC Symbol;Acc:HGNC:24574]      | -                                                    |             | 3025        | 2432        | 2208                |
| 2090                                     | 1477                                                 | 1679        | 14.19313648 | 11.04115046 |                     |
| 13.16225293                              | 11.12711679                                          | 8.698656313 | 7.48007635  |             |                     |
| ENSG00000104852                          | 4087.165602                                          | 5101.112063 | 4479.080327 |             |                     |
| 3286.092066                              | 3419.909517                                          | 3745.578735 | 4555.785997 |             |                     |
| 3483.860106                              | 0.386914855                                          | 0.004678183 | 0.041190828 |             |                     |
| SNRNP70 19                               | 49085419                                             | 49108605    | +           | 4684        |                     |
| protein_coding                           | small nuclear ribonucleoprotein U1 subunit 70        |             |             |             |                     |
| [Source:HGNC Symbol;Acc:HGNC:11150]      | -                                                    |             | 4505        | 5764        | 3853                |
| 3172                                     | 2996                                                 | 4342        | 47.09844758 | 58.30872251 |                     |
| 51.1786669                               | 37.62949031                                          | 39.31626764 | 43.10264791 |             |                     |
| ENSG00000125868                          | 5184.939271                                          | 5023.232489 | 5778.745992 |             |                     |
| 4670.145975                              | 3939.288299                                          | 3260.775591 | 5328.972584 |             |                     |
| 3956.736622                              | 0.429641624                                          | 0.004684536 | 0.041226249 |             | DSTN                |
| 20                                       | 17569863                                             | 17609919    | +           | 3851        |                     |
| protein_coding                           | "destrin, actin depolymerizing factor [Source:HGNC   |             |             |             |                     |
| Symbol;Acc:HGNC:15750]"                  | -                                                    | 5715        | 5676        | 4971        | 4508                |
| 3780                                     | 72.67271738                                          | 69.83856529 | 80.31138048 |             | 3451                |
| 65.04627522                              | 55.08315417                                          | 45.64038501 |             |             |                     |
| ENSG00000171241                          | 1363.598202                                          | 994.7345521 | 1375.227622 |             |                     |
| 740.7174739                              | 357.2869422                                          | 219.1103175 | 1244.520125 |             |                     |
| 439.0382445                              | 1.503470334                                          | 0.004694639 | 0.041294612 |             | SHCBP1              |
| 16                                       | 46580554                                             | 46621626    | -           | 4459        |                     |
| protein_coding                           | SHC binding and spindle associated 1 [Source:HGNC    |             |             |             |                     |
| Symbol;Acc:HGNC:29547]                   | -                                                    | 1503        | 1124        | 1183        | 715                 |
| 254                                      | 16.5063174                                           | 11.94415085 | 16.50646665 |             | 313                 |
| 8.910059683                              | 4.314735971                                          | 2.648666401 |             |             |                     |
| ENSG00000196591                          | 3170.842126                                          | 3268.2871   | 3766.472946 |             |                     |
| 2828.193991                              | 2617.440762                                          | 2205.768039 | 3401.867391 |             |                     |
| 2550.467597                              | 0.415625174                                          | 0.004700631 | 0.04132677  |             | HDAC2               |
| 6                                        | 113933028                                            | 114011308   | -           | 15461       |                     |
| protein_coding                           | histone deacetylase 2 [Source:HGNC                   |             |             |             |                     |
| Symbol;Acc:HGNC:4853]                    | -                                                    | 3495        | 3693        | 3240        | 2730                |
| 2557                                     | 11.069762                                            | 11.31796035 | 13.03809907 |             | 2293                |
| 9.811538459                              | 9.116199794                                          | 7.689961509 |             |             |                     |
| ENSG00000205609                          | 56.24955989                                          | 76.99457832 | 159.261356  |             |                     |
| 1329.147579                              | 98.16829722                                          | 629.7265031 | 97.50183142 |             |                     |
| 685.6807931                              | -2.815252087                                         | 0.004708119 | 0.041372045 |             | EIF3CL              |
| 16                                       | 28379579                                             | 28403879    | -           | 3091        |                     |
| protein_coding                           | eukaryotic translation initiation factor 3 subunit C |             |             |             |                     |
| like [Source:HGNC Symbol;Acc:HGNC:26347] | -                                                    |             |             | 62          | 87                  |
| 137                                      | 1283                                                 | 86          | 730         | 0.982248486 | 1.333664799         |
| 2.757581829                              | 23.06426902                                          | 1.710199623 | 10.98132824 |             |                     |
| ENSG00000089486                          | 169.6559306                                          | 182.3090015 | 119.7366399 |             |                     |
| 214.4454784                              | 273.9580388                                          | 386.4622923 | 157.2338574 |             |                     |
| 291.6219365                              | -0.889992696                                         | 0.004713439 | 0.041398224 |             | CDIP1               |
| 16                                       | 4510675                                              | 4538828     | -           | 4268        | protein_coding cell |

|                                                                     |              |     |             |      |             |           |
|---------------------------------------------------------------------|--------------|-----|-------------|------|-------------|-----------|
| death inducing p53 target 1 [Source:HGNC Symbol;Acc:HGNC:13234] zf- |              |     |             |      |             |           |
| LITAF-like                                                          | 187          | 206 | 103         | 207  | 240         | 448       |
| 2.145585766                                                         | 2.28701625   |     | 1.501480376 |      | 2.69499509  |           |
| 3.456481137                                                         | 4.88072818   |     |             |      |             |           |
| ENSG00000163565                                                     | 3701.583941  |     | 3793.974221 |      | 4267.506847 |           |
| 5308.302568                                                         | 4966.630944  |     | 4803.174204 |      | 3921.02167  |           |
| 5026.035905                                                         | -0.358383334 |     | 0.004716227 |      | 0.041402153 | IFI16     |
| 1                                                                   | 158999968    |     | 159055155   |      | + 5294      |           |
| protein_coding interferon gamma inducible protein 16 [Source:HGNC   |              |     |             |      |             |           |
| Symbol;Acc:HGNC:5395]                                               | -            |     | 4080        | 4287 | 3671        | 5124 4351 |
| 5568                                                                | 37.7402619   |     | 38.37037003 |      | 43.14269733 |           |
| 53.7820346                                                          | 50.51873958  |     | 48.90421676 |      |             |           |
| ENSG00000140280                                                     | 287.5985562  |     | 457.5424942 |      | 317.3602204 |           |
| 198.905951                                                          | 231.7228411  |     | 194.9564242 |      | 354.1670903 |           |
| 208.5284055                                                         | 0.766028561  |     | 0.004724831 |      | 0.041457114 | LYSMD2    |
| 15                                                                  | 51723011     |     | 51751585    |      | - 2074      |           |
| protein_coding LysM domain containing 2 [Source:HGNC                |              |     |             |      |             |           |
| Symbol;Acc:HGNC:28571]                                              | -            |     | 317         | 517  | 273         | 192 203   |
| 226                                                                 | 7.484782655  |     | 11.81158642 |      | 8.189563253 |           |
| 5.144042171                                                         | 6.01637151   |     | 5.066764339 |      |             |           |
| ENSG00000182405                                                     | 221.3692357  |     | 165.4940936 |      | 101.1367735 |           |
| 331.5099184                                                         | 299.070859   |     | 276.9071335 |      | 162.666701  |           |
| 302.4959703                                                         | -0.890815462 |     | 0.004738484 |      | 0.041548913 | PGBD4     |
| 15                                                                  | 34102073     |     | 34108684    |      | + 6612      |           |
| protein_coding piggyBac transposable element derived 4 [Source:HGNC |              |     |             |      |             |           |
| Symbol;Acc:HGNC:19401]                                              | -            |     | 244         | 187  | 87          | 320 262   |
| 321                                                                 | 1.807114477  |     | 1.340093814 |      | 0.818640553 |           |
| 2.689237614                                                         | 2.435655192  |     | 2.257372373 |      |             |           |
| ENSG00000065485                                                     | 387.3961625  |     | 429.2226493 |      | 445.2343019 |           |
| 298.3589265                                                         | 247.7037267  |     | 265.6928259 |      | 420.6177045 |           |
| 270.5851597                                                         | 0.635699344  |     | 0.004741683 |      | 0.041548913 | PDIA5     |
| 3                                                                   | 123067062    |     | 123225227   |      | + 4030      |           |
| protein_coding protein disulfide isomerase family A member 5        |              |     |             |      |             |           |
| [Source:HGNC Symbol;Acc:HGNC:24811]                                 | -            |     |             |      | 427         | 485 383   |
| 288                                                                 | 217 308      |     | 5.188615784 |      | 5.70247163  |           |
| 5.912900548                                                         | 3.970996326  |     | 3.309802258 |      | 3.553666665 |           |
| ENSG00000140395                                                     | 577.0116144  |     | 633.6565296 |      | 747.4821309 |           |
| 459.9700117                                                         | 376.6923033  |     | 471.8635578 |      | 652.7167583 |           |
| 436.1752909                                                         | 0.579602982  |     | 0.00474234  |      | 0.041548913 | WDR61     |
| 15                                                                  | 78277835     |     | 78299794    |      | - 7279      |           |
| protein_coding WD repeat domain 61 [Source:HGNC                     |              |     |             |      |             |           |
| Symbol;Acc:HGNC:30300]                                              | -            |     | 636         | 716  | 643         | 444 330   |
| 547                                                                 | 4.278722095  |     | 4.660878091 |      | 5.495992105 |           |
| 3.389403662                                                         | 2.786695913  |     | 3.494190874 |      |             |           |
| ENSG00000137574                                                     | 1329.122665  |     | 1259.348103 |      | 1210.153808 |           |
| 1753.894662                                                         | 1566.126788  |     | 1722.690173 |      | 1266.208192 |           |
| 1680.903875                                                         | -0.408663706 |     | 0.004760063 |      | 0.041677556 | TGS1      |
| 8                                                                   | 55773142     |     | 55825448    |      | + 3869      |           |
| protein_coding trimethylguanosine synthase 1 [Source:HGNC           |              |     |             |      |             |           |
| Symbol;Acc:HGNC:17843]                                              | -            |     | 1465        | 1423 | 1041        | 1693 1372 |

|                                     |                |                                                   |              |             |
|-------------------------------------|----------------|---------------------------------------------------|--------------|-------------|
| 1997                                | 18.54246972    | 17.42740047                                       | 16.74013077  |             |
| 24.31477595                         | 21.79730202    | 23.9999509                                        |              |             |
| ENSG00000147454                     | 2641.914813    | 2470.906468                                       | 2657.455912  |             |
| 1688.628647                         | 2268.144263    | 1812.404634                                       | 2590.092397  |             |
| 1923.059181                         | 0.429944857    | 0.004761736                                       | 0.041677556  |             |
| SLC25A37                            | 8              | 23528805                                          | 23575463     | +           |
|                                     | protein_coding | solute carrier family 25 member 37                |              | 8147        |
| [Source:HGNC Symbol;Acc:HGNC:29786] |                | -                                                 | 2912         | 2792        |
| 1630                                | 1987           | 2101                                              | 17.50339678  | 16.23843377 |
| 17.45763288                         | 11.11736672    | 14.9915836                                        | 11.9911091   |             |
| ENSG00000129534                     | 1071.463391    | 654.0114182                                       | 766.0819973  |             |
| 625.7249709                         | 519.3787818    | 211.3465661                                       | 830.5189354  |             |
| 452.1501063                         | 0.878974096    | 0.004770144                                       | 0.041730501  |             |
| MIS18BP1                            | 14             | 45203190                                          | 45253540     | -           |
|                                     | protein_coding | MIS18 binding protein 1                           | [Source:HGNC |             |
| Symbol;Acc:HGNC:20190]              |                | -                                                 | 1181         | 739         |
| 245                                 | 9.253340935    | 5.60261606                                        | 6.560126951  |             |
| 5.36993421                          | 4.474852653    | 1.822707939                                       |              |             |
| ENSG00000085872                     | 2345.243747    | 2276.207534                                       | 2301.733467  |             |
| 2842.69755                          | 2793.230504    | 3485.924382                                       | 2307.728249  |             |
| 3040.617479                         | -0.398261439   | 0.004793718                                       | 0.041916002  | CHERP       |
| 19                                  | 16517889       | 16542530                                          | -            | 6113        |
|                                     | protein_coding | calcium homeostasis endoplasmic reticulum protein |              |             |
| [Source:HGNC Symbol;Acc:HGNC:16930] |                | -                                                 | 2585         | 2572        |
| 2744                                | 2447           | 4041                                              | 20.70784164  | 19.9362288  |
| 20.15197618                         | 24.94260189    | 24.60520194                                       | 30.73728279  |             |
| ENSG00000152413                     | 505.3387881    | 466.3924457                                       | 441.746827   |             |
| 565.6387982                         | 724.8473109    | 825.5455663                                       | 471.1593536  |             |
| 705.3438918                         | -0.582200503   | 0.00481546                                        | 0.042085315  | HOMER1      |
| 5                                   | 79372636       | 79514217                                          | -            | 6154        |
|                                     | protein_coding | homer scaffold protein 1                          | [Source:HGNC |             |
| Symbol;Acc:HGNC:17512]              |                | -                                                 | 557          | 527         |
| 957                                 | 4.432271821    | 4.057696535                                       | 3.841784069  |             |
| 4.930003124                         | 6.342545531    | 7.230785259                                       |              |             |
| ENSG00000126947                     | 950.7990123    | 969.0696927                                       | 796.3067802  |             |
| 1101.23451                          | 1377.780637    | 1311.211349                                       | 905.3918284  |             |
| 1263.408832                         | -0.479842201   | 0.004821064                                       | 0.042104911  | ARMCX1      |
| X                                   | 101550531      | 101554700                                         | +            | 2141        |
|                                     | protein_coding | armadillo repeat containing X-linked 1            | [Source:HGNC |             |
| Symbol;Acc:HGNC:18073]              |                | -                                                 | 1048         | 1095        |
| 1520                                | 23.97029059    | 24.23393243                                       | 19.90585109  |             |
| 27.5885351                          | 34.65277055    | 33.01094362                                       |              |             |
| ENSG00000147251                     | 698.5832438    | 458.4274893                                       | 573.1083834  |             |
| 462.0419487                         | 319.6177119    | 185.4673947                                       | 576.7063722  |             |
| 322.3756851                         | 0.840740388    | 0.004822463                                       | 0.042104911  | DOCK11      |
| X                                   | 118495898      | 118686163                                         | +            | 6721        |
|                                     | protein_coding | dedicator of cytokinesis 11                       | [Source:HGNC |             |
| Symbol;Acc:HGNC:23483]              |                | -                                                 | 770          | 518         |
| 215                                 | 5.610292616    | 3.651928829                                       | 4.563729241  |             |
| 3.687338492                         | 2.560775441    | 1.487426733                                       |              |             |
|                                     |                |                                                   |              | 280         |

|                 |                                   |                 |                           |        |  |
|-----------------|-----------------------------------|-----------------|---------------------------|--------|--|
| ENSG00000110851 | 900.9002092                       | 999.1595279     | 890.4686038               |        |  |
| 1443.104113     | 1120.944975                       | 1294.821207     | 930.1761136               |        |  |
| 1286.290099     | -0.467594544                      | 0.004828391     | 0.042120594               | PRDM4  |  |
| 12              | 107732866                         | 107761272       | - 4777                    |        |  |
| protein_coding  | PR/SET domain 4                   | [Source:HGNC    | Symbol;Acc:HGNC:9348]     |        |  |
| zf-C2H2         | 993 1129                          | 766 1393        | 982 1501                  |        |  |
| 10.17941196     | 11.19863633                       | 9.976549804     | 16.20346587               |        |  |
| 12.63582512     | 14.61021036                       |                 |                           |        |  |
| ENSG00000158863 | 830.1346339                       | 1081.464077     | 877.6811957               |        |  |
| 1060.831739     | 1384.629588                       | 1628.662517     | 929.7599689               |        |  |
| 1358.041281     | -0.546686018                      | 0.004829022     | 0.042120594               |        |  |
| FAM160B2        | 8 22089159                        | 22104898        | + 8278                    |        |  |
| protein_coding  | family with sequence              | similarity 160  | member B2                 |        |  |
| [Source:HGNC    | Symbol;Acc:HGNC:16492]            | -               | 915 1222 755              |        |  |
| 1024            | 1213 1888                         | 5.412829602     | 6.994750446               |        |  |
| 5.674510137     | 6.873636764                       | 9.00705343      | 10.60492462               |        |  |
| ENSG00000274825 | 10.88701159                       | 19.46989337     | 2.3249833                 | 0      |  |
| 0               | 0 10.89396275                     | 0               | 5.88291822                |        |  |
| 0.004833444     | 0.042138391                       | AL023803.2      | 20 38955910               |        |  |
| 38956547        | +                                 | 638             | lincRNA novel transcript  |        |  |
| -               | 12 22                             | 2 0             | 0 0                       |        |  |
| 0.921062818     | 1.633911174                       | 0.195036621     | 0 0 0                     |        |  |
| ENSG00000224982 | 0 0                               | 0 0             | 25.11282022               |        |  |
| 13.80222472     | 0 12.97168165                     | -6.171811986    | 0.004850399               |        |  |
| 0.042265371     | TMEM233 12                        | 119593459       | 119643066                 |        |  |
| +               | 3146                              | protein_coding  | transmembrane protein 233 |        |  |
| [Source:HGNC    | Symbol;Acc:HGNC:37219]            | -               | 0 0 0                     |        |  |
| 0               | 22 16                             | 0 0             | 0 0                       |        |  |
| 0.429844449     | 0.236478838                       |                 |                           |        |  |
| ENSG00000150938 | 2063.088697                       | 1412.452264     | 1750.712425               |        |  |
| 1596.427451     | 906.3445116                       | 803.1169512     | 1742.084462               |        |  |
| 1101.962971     | 0.661011869                       | 0.004860434     | 0.042331962               | CRIM1  |  |
| 2               | 36355926                          | 36551135        | + 7122                    |        |  |
| protein_coding  | cysteine rich transmembrane       | BMP regulator 1 |                           |        |  |
| [Source:HGNC    | Symbol;Acc:HGNC:2359]             | -               | 2274 1596 1506            |        |  |
| 1541            | 794 931                           | 15.63569444     | 10.61835788               |        |  |
| 13.15618128     | 12.02299629                       | 6.852765858     | 6.078252393               |        |  |
| ENSG00000176697 | 164.2124248                       | 161.954113      | 216.2234469               |        |  |
| 98.41700702     | 55.93309958                       | 107.8298807     | 180.7966616               |        |  |
| 87.39332909     | 1.043113155                       | 0.004880217     | 0.042483345               | BDNF   |  |
| 11              | 27654893                          | 27722058        | - 7740                    |        |  |
| protein_coding  | brain derived neurotrophic factor | [Source:HGNC    | Symbol;Acc:HGNC:1033]     |        |  |
| 125             | 1.145160337                       | 1.120305763     | 1.495129568               | 49     |  |
| 0.682016196     | 0.389136958                       | 0.750931064     |                           |        |  |
| ENSG00000138650 | 168.7486797                       | 133.6342681     | 191.8111222               |        |  |
| 219.6253209     | 300.2123508                       | 362.308399      | 164.7313567               |        |  |
| 294.0486902     | -0.838990618                      | 0.004885988     | 0.042512659               | PCDH10 |  |
| 4               | 133149315                         | 133208606       | + 10161                   |        |  |
| protein_coding  | protocadherin 10                  | [Source:HGNC    | Symbol;Acc:HGNC:13404]    |        |  |

|                        |                                                 |                                      |              |             |             |             |        |
|------------------------|-------------------------------------------------|--------------------------------------|--------------|-------------|-------------|-------------|--------|
| -                      | 186                                             | 151                                  | 165          | 212         | 263         | 420         |        |
| 0.89640687             | 0.704152842                                     |                                      | 1.010309274  |             | 1.159341689 |             |        |
| 1.590987096            | 1.921957842                                     |                                      |              |             |             |             |        |
| ENSG00000172965        | 1271.058603                                     |                                      | 999.1595279  |             | 1083.442218 |             |        |
| 933.4076139            | 740.8281965                                     |                                      | 609.023166   |             | 1117.886783 |             |        |
| 761.0863255            | 0.555442036                                     |                                      | 0.004896712  |             | 0.042585026 |             |        |
| MIR4435-2HG            | 2                                               | 111036776                            |              | 111523376   | -           |             | 13094  |
| lincRNA                | MIR4435-2                                       | host gene                            | [Source:HGNC |             |             |             |        |
| Symbol;Acc:HGNC:35163] | -                                               | 1401                                 | 1129         | 932         | 901         |             | 649    |
| 706                    | 5.23955595                                      | 4.085526635                          |              | 4.428436507 |             |             |        |
| 3.823529964            | 3.046630043                                     | 2.507052235                          |              |             |             |             |        |
| ENSG00000140319        | 3003.907948                                     | 3098.368031                          |              | 3440.975284 |             |             |        |
| 2798.150905            | 2238.465475                                     | 2020.300644                          |              | 3181.083754 |             |             |        |
| 2352.305675            | 0.435484175                                     | 0.00491513                           |              | 0.042724191 |             |             | SRP14  |
| 15                     | 40035739                                        | 40039188                             |              | -           | 2005        |             |        |
| protein_coding         | signal recognition particle 14                  | [Source:HGNC                         |              |             |             |             |        |
| Symbol;Acc:HGNC:11299] | -                                               | 3311                                 | 3501         | 2960        | 2701        |             | 1961   |
| 2342                   | 80.86740134                                     | 82.73783921                          |              | 91.85106171 |             |             |        |
| 74.85524754            | 60.11883788                                     | 54.31296749                          |              |             |             |             |        |
| ENSG00000187164        | 369.2511432                                     | 222.1337834                          |              | 258.0731463 |             |             |        |
| 166.7909277            | 182.6386925                                     | 97.47821212                          |              | 283.152691  |             |             |        |
| 148.9692774            | 0.930334533                                     | 0.004928919                          |              | 0.042823014 |             |             | SHTN1  |
| 10                     | 116881482                                       | 117126586                            |              | -           | 8247        |             |        |
| protein_coding         | shootin 1                                       | [Source:HGNC Symbol;Acc:HGNC:29319]  |              |             |             |             | -      |
| 407                    | 251                                             | 222                                  | 161          | 160         | 113         | 2.416724241 |        |
| 1.442129191            | 1.674803372                                     | 1.084780638                          |              | 1.192535588 |             |             |        |
| 0.637108599            |                                                 |                                      |              |             |             |             |        |
| ENSG00000100395        | 611.4871511                                     | 689.4112243                          |              | 633.5579492 |             |             |        |
| 807.0194575            | 922.3253972                                     | 998.0733754                          |              | 644.8187748 |             |             |        |
| 909.13941              | -0.495780736                                    | 0.004933886                          |              | 0.042845124 |             |             |        |
| L3MBTL2 22             | 41205205                                        | 41231271                             |              | +           | 6451        |             |        |
| protein_coding         | "L3MBTL2, polycomb repressive complex 1 subunit | [Source:HGNC Symbol;Acc:HGNC:18594]" |              |             |             |             |        |
| 779                    | 808                                             | 1157                                 | 5.116365222  | 5.721855114 |             |             | 545    |
| 5.256253556            | 6.709999061                                     | 7.69895319                           |              | 8.339448579 |             |             |        |
| ENSG00000172809        | 3982.831741                                     | 5229.43636                           |              | 4913.852204 |             |             |        |
| 5730.977714            | 6196.017643                                     | 6682.864684                          |              | 4708.706768 |             |             |        |
| 6203.28668             | -0.397835871                                    | 0.004939672                          |              | 0.042863565 |             |             | RPL38  |
| 17                     | 74203582                                        | 74210655                             |              | +           | 3829        |             |        |
| protein_coding         | ribosomal protein L38                           | [Source:HGNC                         |              |             |             |             |        |
| Symbol;Acc:HGNC:10349] | -                                               | 4390                                 | 5909         | 4227        | 5532        |             | 5428   |
| 7747                   | 56.14458001                                     | 73.12317909                          |              | 68.68370719 |             |             |        |
| 80.28027449            | 87.13684533                                     | 94.07607892                          |              |             |             |             |        |
| ENSG00000153187        | 17913.67032                                     | 17450.33443                          |              | 17891.90898 |             |             |        |
| 15693.88673            | 12307.56489                                     | 13640.04858                          |              | 17751.97125 |             |             |        |
| 13880.50007            | 0.354886991                                     | 0.004941819                          |              | 0.042863565 |             |             | HNRNPU |
| 1                      | 244840638                                       | 244864560                            |              | -           | 22512       |             |        |
| protein_coding         | heterogeneous nuclear ribonucleoprotein U       | [Source:HGNC                         |              |             |             |             |        |
| Symbol;Acc:HGNC:5048]  | -                                               | 19745                                | 19718        | 15391       | 15149       |             | 10782  |
| 15812                  | 42.95084788                                     | 41.5025922                           |              | 42.53628966 |             |             |        |

|                                                 |                                                       |                                 |                |             |  |
|-------------------------------------------------|-------------------------------------------------------|---------------------------------|----------------|-------------|--|
| 37.39227845                                     | 29.43964764                                           | 32.65906474                     |                |             |  |
| ENSG00000145723                                 | 184.1719461                                           | 184.0789918                     | 185.998664     |             |  |
| 119.1363769                                     | 91.31934625                                           | 80.22543121                     | 184.7498673    |             |  |
| 96.89371813                                     | 0.932514353                                           | 0.00494328                      | 0.042863565    | GIN1        |  |
| 5                                               | 103086000                                             | 103120151                       | - 4182         |             |  |
| protein_coding                                  | gypsy retrotransposon integrase                       | 1                               | [Source:HGNC   |             |  |
| Symbol;Acc:HGNC:25959]                          | -                                                     | 203 208                         | 160 115        | 80          |  |
| 93                                              | 2.377063005                                           | 2.356707844                     | 2.380360861    |             |  |
| 1.5280088                                       | 1.175853778                                           | 1.034022379                     |                |             |  |
| ENSG00000047634                                 | 532.556317                                            | 492.9423003                     | 416.1720107    |             |  |
| 305.610706                                      | 302.4953345                                           | 335.5665886                     | 480.556876     |             |  |
| 314.557543                                      | 0.611721839                                           | 0.004948126                     | 0.042875319    | SCML1       |  |
| X                                               | 17737449                                              | 17754988                        | + 5497         |             |  |
| protein_coding                                  | Scm polycomb group protein like                       | 1                               | [Source:HGNC   |             |  |
| Symbol;Acc:HGNC:10580]                          | -                                                     | 587 557                         | 358 295        | 265         |  |
| 389                                             | 5.22926978                                            | 4.801267455                     | 4.051950547    |             |  |
| 2.982004693                                     | 2.963244569                                           | 3.290446868                     |                |             |  |
| ENSG00000197561                                 | 12.70151352                                           | 12.38993214                     | 5.812458249    | 0           |  |
| 0                                               | 0                                                     | 10.30130131                     | 0 5.800377638  |             |  |
| 0.004949483                                     | 0.042875319                                           | ELANE 19                        | 851014 856247  | +           |  |
| 1028                                            | protein_coding                                        | "elastase, neutrophil expressed |                |             |  |
| [Source:HGNC Symbol;Acc:HGNC:3309]"             | -                                                     | 14 14                           | 5              |             |  |
| 0                                               | 0                                                     | 0                               | 0.666904434    | 0.645299549 |  |
| 0.302610321                                     | 0                                                     | 0                               | 0              |             |  |
| ENSG00000139977                                 | 635.9829272                                           | 673.4813115                     | 625.4205076    |             |  |
| 941.6953619                                     | 818.4496408                                           | 937.6886422                     | 644.9615821    |             |  |
| 899.2778816                                     | -0.479682215                                          | 0.004956098                     | 0.042911613    | NAA30       |  |
| 14                                              | 57390544                                              | 57415917                        | + 7653         |             |  |
| protein_coding                                  | "N(alpha)-acetyltransferase 30,                       | NatC catalytic subunit          |                |             |  |
| [Source:HGNC Symbol;Acc:HGNC:19844]"            | -                                                     | 701 761                         | 538            |             |  |
| 909                                             | 717 1087                                              | 4.485542627                     | 4.711719026    |             |  |
| 4.37378478                                      | 6.600004225                                           | 5.758837215                     | 6.604331266    |             |  |
| ENSG00000049167                                 | 222.2764867                                           | 215.0538222                     | 235.9858049    |             |  |
| 148.1434948                                     | 114.1491828                                           | 114.730993                      | 224.4387046    |             |  |
| 125.6745569                                     | 0.836484857                                           | 0.004961574                     | 0.042938005    | ERCC8       |  |
| 5                                               | 60873831                                              | 60945073                        | - 5448         |             |  |
| protein_coding                                  | "ERCC excision repair 8, CSA ubiquitin ligase complex | subunit                         |                |             |  |
| [Source:HGNC Symbol;Acc:HGNC:3439]"             | -                                                     | 245 243                         |                |             |  |
| 203                                             | 143 100                                               | 133                             | 2.202204618    | 2.113467703 |  |
| 2.318279451                                     | 1.458515276                                           | 1.128262779                     | 1.135129892    |             |  |
| ENSG00000134321                                 | 5.443505796                                           | 12.38993214                     | 12.78740815    |             |  |
| 5.179842475                                     | 95.88531357                                           | 69.87376267                     | 10.2069487     |             |  |
| 56.97963957                                     | -2.484968078                                          | 0.004979381                     | 0.043071035    | RSAD2       |  |
| 2                                               | 6865806 6898239                                       | + 4834                          | protein_coding |             |  |
| radical S-adenosyl methionine domain containing | 2                                                     | [Source:HGNC                    |                |             |  |
| Symbol;Acc:HGNC:30908]                          | -                                                     | 6 14                            | 11 5           | 84          |  |
| 81                                              | 0.060781762                                           | 0.13722961                      | 0.141577059    |             |  |
| 0.057474526                                     | 1.068119885                                           | 0.779129038                     |                |             |  |
| ENSG00000146409                                 | 43.54804637                                           | 33.62981582                     | 26.73730795    |             |  |
| 142.9636523                                     | 155.2428886                                           | 30.19236658                     | 34.63839004    |             |  |

|                                                     |                                                  |              |                        |                |        |
|-----------------------------------------------------|--------------------------------------------------|--------------|------------------------|----------------|--------|
| 109.4663025                                         | -1.653893825                                     | 0.004987655  | 0.043087586            |                |        |
| SLC18B1 6                                           | 132769370                                        | 132813339    | -                      | 2760           |        |
| protein_coding                                      | solute carrier family 18 member B1               |              | [Source:HGNC           |                |        |
| Symbol;Acc:HGNC:21573]                              | -                                                | 48 38        | 23 138                 | 136            |        |
| 35                                                  | 0.851649388                                      | 0.652380476  | 0.51847235             |                |        |
| 2.77831861                                          | 3.028845959                                      | 0.589644131  |                        |                |        |
| ENSG00000204054                                     | 407.3556837                                      | 438.0726008  | 497.5464262            |                |        |
| 502.44472                                           | 667.7727195                                      | 1017.051434  | 447.6582369            |                |        |
| 729.0896246                                         | -0.705505862                                     | 0.004988425  | 0.043087586            |                |        |
| LINC00963                                           | 9 129483451                                      | 129513686    | +                      | 13171          |        |
| processed_transcript                                | long intergenic non-protein coding RNA           |              |                        |                |        |
| 963 [Source:HGNC                                    | Symbol;Acc:HGNC:48716]                           | -            | 449 495                | 428            |        |
| 485                                                 | 585 1179                                         | 1.669384108  | 1.780790745            |                |        |
| 2.021770549                                         | 2.046138525                                      | 2.730137225  | 4.162229984            |                |        |
| ENSG00000170604                                     | 1730.127592                                      | 2151.423217  | 1946.011022            |                |        |
| 1830.55633                                          | 3156.224905                                      | 3905.166958  | 1942.52061             |                |        |
| 2963.982731                                         | -0.60982416                                      | 0.004988602  | 0.043087586            |                |        |
| IRF2BP1 19                                          | 45883607                                         | 45886170     | -                      | 2564           |        |
| protein_coding                                      | interferon regulatory factor 2 binding protein 1 |              |                        |                |        |
| [Source:HGNC                                        | Symbol;Acc:HGNC:21728]                           | -            | 1907 2431              | 1674           |        |
| 1767                                                | 2765 4527                                        | 36.42179585  | 44.92554753            |                |        |
| 40.62040783                                         | 38.29398584                                      | 66.28640638  | 82.0962825             |                |        |
| ENSG00000124313                                     | 153.3254133                                      | 132.749273   | 198.7860721            |                |        |
| 105.6687865                                         | 63.92354238                                      | 56.07153794  | 161.6202528            |                |        |
| 75.22128893                                         | 1.103293336                                      | 0.005007085  | 0.043226125            |                | IQSEC2 |
| X                                                   | 53225828                                         | 53321350     | -                      | 13115          |        |
| protein_coding                                      | IQ motif and Sec7 domain 2                       |              | [Source:HGNC           |                |        |
| Symbol;Acc:HGNC:29059]                              | -                                                | 169 150      | 171 102                | 56             |        |
| 65                                                  | 0.631025767                                      | 0.541937751  | 0.811212552            |                |        |
| 0.432159357                                         | 0.262462398                                      | 0.230449664  |                        |                |        |
| ENSG00000257467                                     | 13.60876449                                      | 0.884995153  | 19.76235805            | 0              |        |
| 0                                                   | 0 11.4187059                                     | 0            | 5.942578409            |                |        |
| 0.005017195                                         | 0.043292274                                      | PPFIA2-AS1   | 12 81270675            |                |        |
| 81312422                                            | +                                                | 2024 lincRNA | PPFIA2 antisense RNA 1 |                |        |
| [Source:HGNC                                        | Symbol;Acc:HGNC:53397]                           | -            | 15 1                   | 17             |        |
| 0                                                   | 0 0                                              | 0.362918773  | 0.023410783            |                |        |
| 0.522570946                                         | 0 0                                              | 0            |                        |                |        |
| ENSG00000050405                                     | 1341.824179                                      | 888.5351337  | 1515.889111            |                |        |
| 958.2708578                                         | 828.7230673                                      | 672.8584553  | 1248.749475            |                |        |
| 819.9507935                                         | 0.606733058                                      | 0.005021229  | 0.043305957            |                | LIMA1  |
| 12                                                  | 50175788                                         | 50283546     | -                      | 6317           |        |
| protein_coding                                      | LIM domain and actin binding 1                   |              | [Source:HGNC           |                |        |
| Symbol;Acc:HGNC:24636]                              | -                                                | 1479 1004    | 1304 925               | 726            |        |
| 780                                                 | 11.46531472                                      | 7.530941547  | 12.84320933            |                |        |
| 8.136598747                                         | 7.064364574                                      | 5.741359533  |                        |                |        |
| ENSG00000188976                                     | 6501.360422                                      | 7740.167609  | 6595.977621            |                |        |
| 7291.146267                                         | 10004.03438                                      | 11218.62078  | 6945.835218            |                |        |
| 9504.600478                                         | -0.452490683                                     | 0.005025727  | 0.043323625            |                | NOC2L  |
| 1                                                   | 944204 959309                                    | -            | 5539                   | protein_coding | NOC2   |
| like nucleolar associated transcriptional repressor |                                                  |              | [Source:HGNC           |                |        |

|                        |                                                 |             |       |             |                |       |
|------------------------|-------------------------------------------------|-------------|-------|-------------|----------------|-------|
| Symbol;Acc:HGNC:24517] | -                                               | 7166        | 8746  | 5674        | 7038           | 8764  |
| 13005                  | 63.35401196                                     | 74.81773367 |       | 63.7330662  |                |       |
| 70.60410319            | 97.25643898                                     | 109.171684  |       |             |                |       |
| ENSG00000100316        | 20863.14321                                     | 24393.12141 |       | 25300.46827 |                |       |
| 26990.0872             | 32618.12899                                     | 31194.75316 |       | 23518.91096 |                |       |
| 30267.65645            | -0.363983227                                    | 0.005028606 |       | 0.043327333 |                | RPL3  |
| 22                     | 39312882                                        | 39320389    |       | -           | 4787           |       |
| protein_coding         | ribosomal protein L3 [Source:HGNC               |             |       |             |                |       |
| Symbol;Acc:HGNC:10332] | -                                               | 22996       | 27563 | 21764       | 26053          | 28575 |
| 36162                  | 235.2434587                                     | 272.8283512 |       | 282.8669035 |                |       |
| 302.4171078            | 366.9189751                                     | 351.2529922 |       |             |                |       |
| ENSG00000088888        | 2149.277538                                     | 2160.273169 |       | 1790.237141 |                |       |
| 2553.66234             | 2512.423514                                     | 3137.418208 |       | 2033.262616 |                |       |
| 2734.501354            | -0.427393438                                    | 0.005047632 |       | 0.043470091 |                | MAVS  |
| 20                     | 3846799                                         | 3876123     | +     | 11771       | protein_coding |       |
| mitochondrial          | antiviral signaling protein [Source:HGNC        |             |       |             |                |       |
| Symbol;Acc:HGNC:29233] | -                                               | 2369        | 2441  | 1540        | 2465           | 2201  |
| 3637                   | 9.855539084                                     | 9.826092781 |       | 8.139808877 |                |       |
| 11.63631871            | 11.49354613                                     | 14.36683022 |       |             |                |       |
| ENSG00000141002        | 3544.629524                                     | 3718.749633 |       | 4433.743153 |                |       |
| 2635.503851            | 3314.892269                                     | 2819.967039 |       | 3899.04077  |                |       |
| 2923.454386            | 0.415373438                                     | 0.005053887 |       | 0.043483223 |                | TCF25 |
| 16                     | 89873570                                        | 89913627    |       | +           | 7967           |       |
| protein_coding         | transcription factor 25 [Source:HGNC            |             |       |             |                |       |
| Symbol;Acc:HGNC:29181] | Others                                          | 3907        | 4202  | 3814        | 2544           | 2904  |
| 3269                   | 24.01470619                                     | 24.99123232 |       | 29.78466489 |                |       |
| 17.74329746            | 22.40521703                                     | 19.07880291 |       |             |                |       |
| ENSG00000172164        | 442.7384714                                     | 241.6036768 |       | 409.1970608 |                |       |
| 277.6395566            | 167.7992987                                     | 117.3189102 |       | 364.5130697 |                |       |
| 187.5859218            | 0.959432263                                     | 0.005054074 |       | 0.043483223 |                | SNTB1 |
| 8                      | 120535745                                       | 120813273   |       | -           | 6868           |       |
| protein_coding         | syntrophin beta 1 [Source:HGNC                  |             |       |             |                |       |
| Symbol;Acc:HGNC:11168] |                                                 |             |       |             |                |       |
| -                      | 488                                             | 273         |       | 147         | 136            |       |
| 3.479511042            | 1.883470409                                     | 3.188740837 |       | 2.168285928 |                |       |
| 1.31563194             | 0.920745574                                     |             |       |             |                |       |
| ENSG00000135677        | 3065.601014                                     | 2611.620697 |       | 3526.999666 |                |       |
| 2586.813332            | 2203.079228                                     | 1888.31687  |       | 3068.073792 |                |       |
| 2226.06981             | 0.462779532                                     | 0.005057125 |       | 0.043488322 |                | GNS   |
| 12                     | 64713445                                        | 64759447    |       | -           | 6284           |       |
| protein_coding         | glucosamine (N-acetyl)-6-sulfatase [Source:HGNC |             |       |             |                |       |
| Symbol;Acc:HGNC:4422]  | -                                               | 3379        | 2951  | 3034        | 2497           | 1930  |
| 2189                   | 26.33180916                                     | 22.25150929 |       | 30.03905366 |                |       |
| 22.07976311            | 18.87854384                                     | 16.19722456 |       |             |                |       |
| ENSG00000260916        | 282.1550504                                     | 287.6234248 |       | 255.748163  |                |       |
| 152.2873688            | 181.4972007                                     | 158.7255843 |       | 275.1755461 |                |       |
| 164.1700513            | 0.746761167                                     | 0.005061818 |       | 0.043507535 |                | CCPG1 |
| 15                     | 55340032                                        | 55408510    |       | -           | 8790           |       |
| protein_coding         | cell cycle progression 1 [Source:HGNC           |             |       |             |                |       |
| Symbol;Acc:HGNC:24227] | -                                               | 311         | 325   | 220         | 147            | 159   |
| 184                    | 1.73260753                                      | 1.751946851 |       | 1.55718658  |                |       |



|                        |                                                     |                              |              |             |  |  |
|------------------------|-----------------------------------------------------|------------------------------|--------------|-------------|--|--|
| 0.929266975            | 1.111874089                                         | 0.973329679                  |              |             |  |  |
| ENSG00000153944        | 1378.114217                                         | 1051.374242                  | 1164.816633  |             |  |  |
| 1074.299329            | 630.1034892                                         | 628.001225                   | 1198.101697  |             |  |  |
| 777.4680144            | 0.624177285                                         | 0.00507648                   | 0.043612358  | MSI2        |  |  |
| 17                     | 57255851                                            | 57684685                     | + 21479      |             |  |  |
| protein_coding         | musashi RNA binding protein 2 [Source:HGNC          |                              |              |             |  |  |
| Symbol;Acc:HGNC:18585] | -                                                   | 1519 1188                    | 1002 1037    | 552         |  |  |
| 728                    | 3.463158746                                         | 2.620769485                  | 2.902421685  |             |  |  |
| 2.682728617            | 1.579691859                                         | 1.575971428                  |              |             |  |  |
| ENSG00000266094        | 592.4348808                                         | 516.8371694                  | 482.4340347  |             |  |  |
| 271.4237457            | 415.5030255                                         | 330.3907543                  | 530.568695   |             |  |  |
| 339.1058418            | 0.647358413                                         | 0.005082247                  | 0.043640711  | RASSF5      |  |  |
| 1                      | 206507530                                           | 206589448                    | + 6976       |             |  |  |
| protein_coding         | Ras association domain family member 5 [Source:HGNC |                              |              |             |  |  |
| Symbol;Acc:HGNC:17609] | -                                                   | 653 584                      | 415 262      | 364         |  |  |
| 383                    | 4.583902725                                         | 3.966731601                  | 3.701250435  |             |  |  |
| 2.086925103            | 3.207319849                                         | 2.552838378                  |              |             |  |  |
| ENSG00000171502        | 70.76557535                                         | 50.44472373                  | 54.63710754  |             |  |  |
| 12.43162194            | 10.27342645                                         | 26.7418104                   | 58.61580221  |             |  |  |
| 16.48228627            | 1.817596514                                         | 0.005085517                  | 0.0436476    |             |  |  |
| COL24A1 1              | 85729233                                            | 86156943                     | - 9568       |             |  |  |
| protein_coding         | collagen type XXIV alpha 1 chain [Source:HGNC       |                              |              |             |  |  |
| Symbol;Acc:HGNC:20821] | -                                                   | 78 57                        | 47 12        | 9           |  |  |
| 31                     | 0.399210651                                         | 0.282280014                  | 0.305621243  |             |  |  |
| 0.069690266            | 0.057818751                                         | 0.150650836                  |              |             |  |  |
| ENSG00000226853        | 0 0                                                 | 0 4.14387398                 | 13.69790194  |             |  |  |
| 12.93958568            | 0                                                   | 10.26045387                  | -5.835064188 |             |  |  |
| 0.005092897            | 0.043666953                                         | AC010894.2                   | 2 174487389  |             |  |  |
| 174488386              | + 0                                                 | 791 lincRNA novel transcript |              |             |  |  |
| - 0                    | 0                                                   | 0 4                          | 12 15        | 0           |  |  |
| 0                      | 0                                                   | 0.280993033                  | 0.932507048  | 0.881750661 |  |  |
| ENSG00000126785        | 258.5665253                                         | 197.3539191                  | 361.5349031  |             |  |  |
| 158.5031797            | 159.8088559                                         | 127.6705787                  | 272.4851159  |             |  |  |
| 148.6608715            | 0.873320427                                         | 0.005094543                  | 0.043666953  | RH0J        |  |  |
| 14                     | 63204114                                            | 63293219                     | + 3793       |             |  |  |
| protein_coding         | ras homolog family member J [Source:HGNC            |                              |              |             |  |  |
| Symbol;Acc:HGNC:688]   | -                                                   | 285 223                      | 311 153      | 140         |  |  |
| 148                    | 3.679516043                                         | 2.785790552                  | 5.101341446  |             |  |  |
| 2.241406524            | 2.268780878                                         | 1.814303301                  |              |             |  |  |
| ENSG00000130741        | 4219.624243                                         | 3490.420884                  | 3659.523714  |             |  |  |
| 3026.063974            | 2967.878753                                         | 2768.208696                  | 3789.85628   |             |  |  |
| 2920.717141            | 0.376025133                                         | 0.005095177                  | 0.043666953  | EIF2S3      |  |  |
| X                      | 24054716                                            | 24077971                     | + 3472       |             |  |  |
| protein_coding         | eukaryotic translation initiation factor 2 subunit  |                              |              |             |  |  |
| gamma [Source:HGNC     | Symbol;Acc:HGNC:3267]                               | -                            | 4651 3944    |             |  |  |
| 3148                   | 2921 2600                                           | 3209 65.59871113             | 53.82494945  |             |  |  |
| 56.41074739            | 46.74809136                                         | 46.03000178                  | 42.97550797  |             |  |  |
| ENSG00000183114        | 36.29003864                                         | 47.78973827                  | 32.5497662   |             |  |  |
| 107.7407235            | 78.76293614                                         | 100.9287683                  | 38.87651437  |             |  |  |
| 95.8108093             | -1.298736316                                        | 0.005102363                  | 0.043707358  | FAM43B      |  |  |

|                                     |                                                       |             |             |                                    |                |
|-------------------------------------|-------------------------------------------------------|-------------|-------------|------------------------------------|----------------|
| 1                                   | 20552439                                              | 20555010    | +           | 2572                               |                |
| protein_coding                      | family with sequence similarity                       |             |             | 43 member B                        |                |
| [Source:HGNC Symbol;Acc:HGNC:31791] |                                                       | -           | 40          | 54                                 | 28             |
| 104                                 | 69                                                    | 117         | 0.761583823 | 0.994830832                        |                |
| 0.677320022                         | 2.246851753                                           | 1.649018343 | 2.115173105 |                                    |                |
| ENSG00000013288                     | 672.2729658                                           | 542.5020289 | 606.8206412 |                                    |                |
| 405.0636815                         | 471.436125                                            | 278.6324116 | 607.1985453 |                                    |                |
| 385.0440727                         | 0.659318886                                           | 0.005111751 | 0.043766586 |                                    | MAN2B2         |
| 4                                   | 6575175                                               | 6623362     | +           | 8898                               | protein_coding |
| mannosidase alpha class 2B member 2 | [Source:HGNC                                          |             |             |                                    |                |
| Symbol;Acc:HGNC:29623]              | -                                                     | 741         | 613         | 522                                | 391            |
| 323                                 | 4.078068253                                           | 3.26433344  | 3.649933469 |                                    | 413            |
| 2.441723031                         | 2.853021277                                           | 1.687878336 |             |                                    |                |
| ENSG00000107937                     | 3371.34459                                            | 3380.681485 | 2786.492485 |                                    |                |
| 3936.680281                         | 4016.909743                                           | 4524.541792 | 3179.506186 |                                    |                |
| 4159.377272                         | -0.387363746                                          | 0.005118906 | 0.043806644 |                                    | GTPBP4         |
| 10                                  | 988019                                                | 1019936     | +           | 6540                               | protein_coding |
| binding protein 4                   | [Source:HGNC Symbol;Acc:HGNC:21535]                   |             |             | -                                  | 3716           |
| 3820                                | 2397                                                  | 3800        | 3519        | 5245                               | 27.82445334    |
| 27.67655656                         | 22.80327015                                           | 32.28627131 | 33.07416424 |                                    |                |
| 37.29054772                         |                                                       |             |             |                                    |                |
| ENSG00000170345                     | 149.6964094                                           | 127.439302  | 105.7867401 |                                    |                |
| 511.7684365                         | 125.5641011                                           | 227.736708  | 127.6408172 |                                    |                |
| 288.3564152                         | -1.174802192                                          | 0.005124103 | 0.043822566 |                                    | FOS            |
| 14                                  | 75278774                                              | 75282230    | +           | 3238                               |                |
| protein_coding                      | "Fos proto-oncogene, AP-1 transcription factor        |             |             | subunit                            |                |
| [Source:HGNC Symbol;Acc:HGNC:3796]" | TF_bZIP                                               | 165         | 144         | 91                                 |                |
| 494                                 | 110                                                   | 264         | 2.495374791 | 2.107230718                        |                |
| 1.748523182                         | 8.477389706                                           | 2.088157253 | 3.791037676 |                                    |                |
| ENSG00000101361                     | 4183.334204                                           | 5240.056302 | 4198.919839 |                                    |                |
| 5401.539732                         | 5971.143753                                           | 6604.364531 | 4540.770115 |                                    |                |
| 5992.349339                         | -0.400121236                                          | 0.005125722 | 0.043822566 |                                    | NOP56          |
| 20                                  | 2652145                                               | 2658393     | +           | 5398                               | protein_coding |
| ribonucleoprotein                   | [Source:HGNC Symbol;Acc:HGNC:15911]                   |             |             | -                                  | 4611           |
| 5921                                | 3612                                                  | 5214        | 5231        | 7656                               | 41.83029482    |
| 51.97429675                         | 41.63146636                                           | 53.67229801 | 59.56610463 |                                    |                |
| 65.94776211                         |                                                       |             |             |                                    |                |
| ENSG00000176340                     | 1205.736534                                           | 2216.027863 | 2293.596025 |                                    |                |
| 1004.88944                          | 1309.291127                                           | 1391.43678  | 1905.120141 |                                    |                |
| 1235.205782                         | 0.624619574                                           | 0.00513108  | 0.043847189 |                                    | COX8A          |
| 11                                  | 63974607                                              | 63976543    | +           | 507                                |                |
| protein_coding                      | cytochrome c oxidase subunit 8A                       |             |             | [Source:HGNC                       |                |
| Symbol;Acc:HGNC:2294]               | -                                                     | 1329        | 2504        | 1973                               | 970            |
| 1613                                | 128.3647281                                           | 234.0199089 | 242.1173838 |                                    | 1147           |
| 106.3104162                         | 139.0601901                                           | 147.9303982 |             |                                    |                |
| ENSG00000254838                     | 13.60876449                                           | 23.89486913 | 19.76235805 |                                    | 0              |
| 3.424475485                         | 0                                                     | 19.08866389 | 1.141491828 |                                    |                |
| 4.149810214                         | 0.005152511                                           | 0.044009063 | GVINP1      | 11                                 |                |
| 6713536                             | 6746439                                               | -           | 8438        | transcribed_unprocessed_pseudogene |                |
|                                     | "GTPase, very large interferon inducible pseudogene 1 |             |             |                                    |                |

|                                      |                                                       |              |             |                       |
|--------------------------------------|-------------------------------------------------------|--------------|-------------|-----------------------|
| [Source:HGNC Symbol;Acc:HGNC:25813]" | -                                                     | 15           | 27          | 17                    |
| 0                                    | 3                                                     | 0            | 0.087052334 | 0.151617972           |
| 0.125347665                          | 0                                                     | 0.021853907  | 0           |                       |
| ENSG00000075568                      | 640.519182                                            | 628.3465587  | 694.007515  |                       |
| 559.4229872                          | 364.1358932                                           | 320.0390858  | 654.2910852 |                       |
| 414.5326554                          | 0.658920057                                           | 0.005176926  | 0.044192636 |                       |
| TMEM131                              | 2                                                     | 97756333     | 97995891    | - 12985               |
| protein_coding                       | transmembrane protein 131                             | [Source:HGNC |             |                       |
| Symbol;Acc:HGNC:30366]               | -                                                     | 706          | 710         | 597 540 319           |
| 371                                  | 2.662511122                                           | 2.590853375  | 2.86048203  |                       |
| 2.310807931                          | 1.510066556                                           | 1.328504329  |             |                       |
| ENSG00000134954                      | 2995.74269                                            | 2735.520018  | 3538.624582 |                       |
| 2643.791599                          | 2221.343098                                           | 1868.476172  | 3089.96243  |                       |
| 2244.536956                          | 0.461161532                                           | 0.005179     | 0.044192636 | ETS1                  |
| 11                                   | 128458761                                             | 128587558    | - 7149      |                       |
| protein_coding                       | "ETS proto-oncogene 1, transcription factor           |              |             |                       |
| [Source:HGNC Symbol;Acc:HGNC:3488]"  | ETS                                                   | 3302         | 3091        | 3044                  |
| 2552                                 | 1946                                                  | 2166         | 22.6183258  | 20.48708403           |
| 26.49147853                          | 19.83569476                                           | 16.73188608  | 14.08783231 |                       |
| ENSG00000233927                      | 870.0536764                                           | 1297.402894  | 1291.528223 |                       |
| 1729.031418                          | 1418.874342                                           | 1840.009084  | 1152.994931 |                       |
| 1662.638281                          | -0.528917532                                          | 0.00518506   | 0.044223009 | RPS28                 |
| 19                                   | 8321158                                               | 8323340      | +           | 2119 protein_coding   |
| ribosomal protein S28                | [Source:HGNC Symbol;Acc:HGNC:10418]                   |              |             | -                     |
| 959                                  | 1466                                                  | 1111         | 1669        | 1243 2133 22.16237678 |
| 32.78154774                          | 32.62045007                                           | 43.7660572   | 36.05682916 |                       |
| 46.80485637                          |                                                       |              |             |                       |
| ENSG00000124217                      | 510.7822938                                           | 587.6367817  | 562.6459585 |                       |
| 622.6170654                          | 870.9582649                                           | 1006.699766  | 553.6883447 |                       |
| 833.4250321                          | -0.590620594                                          | 0.005191143  | 0.044233907 | MOCS3                 |
| 20                                   | 50958826                                              | 50963931     | +           | 5106                  |
| protein_coding                       | molybdenum cofactor synthesis 3                       | [Source:HGNC |             |                       |
| Symbol;Acc:HGNC:15765]               | -                                                     | 563          | 664         | 484 601 763           |
| 1167                                 | 5.399533847                                           | 6.161886716  | 5.897546825 |                       |
| 6.540421013                          | 9.185252251                                           | 10.62725407  |             |                       |
| ENSG00000125247                      | 243.1432589                                           | 226.5587592  | 269.6980628 |                       |
| 340.8336348                          | 530.7937001                                           | 350.2314524  | 246.4666936 |                       |
| 407.2862624                          | -0.724276833                                          | 0.005195292  | 0.044233907 | TMTC4                 |
| 13                                   | 100603927                                             | 100675093    | -           | 6272                  |
| protein_coding                       | transmembrane and tetratricopeptide repeat containing |              |             |                       |
| 4                                    | [Source:HGNC Symbol;Acc:HGNC:25904]                   | -            | 268         | 256 232               |
| 329                                  | 465                                                   | 406          | 2.092461268 | 1.934017308           |
| 2.30138237                           | 2.914753899                                           | 4.55715986   | 3.009892619 |                       |
| ENSG00000182973                      | 1480.633576                                           | 1477.941906  | 1382.202572 |                       |
| 1955.908518                          | 1745.341005                                           | 2022.025922  | 1446.926018 |                       |
| 1907.758482                          | -0.398954804                                          | 0.005196177  | 0.044233907 | CNOT10                |
| 3                                    | 32685145                                              | 32773875     | +           | 4846                  |
| protein_coding                       | CCR4-NOT transcription complex subunit 10             | [Source:HGNC |             |                       |
| Symbol;Acc:HGNC:23817]               | -                                                     | 1632         | 1670        | 1189 1888 1529        |
| 2344                                 | 16.49170008                                           | 16.32899673  | 15.26529816 |                       |

|                                                                    |              |             |                          |            |                |      |
|--------------------------------------------------------------------|--------------|-------------|--------------------------|------------|----------------|------|
| 21.64864026                                                        | 19.39418061  | 22.49081616 |                          |            |                |      |
| ENSG00000137275                                                    | 1579.523932  | 1635.471043 | 1547.276386              |            |                |      |
| 1909.289936                                                        | 2354.897642  | 2046.179815 | 1587.423787              |            |                |      |
| 2103.455798                                                        | -0.405671587 | 0.005197413 | 0.044233907              | RIPK1      |                |      |
| 6                                                                  | 3063991      | 3115187     | +                        | 4231       | protein_coding |      |
| receptor interacting serine/threonine kinase 1 [Source:HGNC        |              |             |                          |            |                |      |
| Symbol;Acc:HGNC:10019]                                             | -            | 1741        | 1848                     | 1331       | 1843           | 2063 |
| 2372                                                               | 20.15043516  | 20.69595076 | 19.57230058              |            |                |      |
| 24.20440179                                                        | 29.97116074  | 26.06769779 |                          |            |                |      |
| ENSG00000111843                                                    | 2849.675284  | 2981.548671 | 3778.097862              |            |                |      |
| 2771.215724                                                        | 2252.163377  | 1596.744873 | 3203.107272              |            |                |      |
| 2206.707991                                                        | 0.537717989  | 0.005198841 | 0.044233907              |            |                |      |
| TMEM14C                                                            | 6            | 10722915    | 10731129                 | +          | 1321           |      |
| protein_coding transmembrane protein 14C [Source:HGNC              |              |             |                          |            |                |      |
| Symbol;Acc:HGNC:20952]                                             | -            | 3141        | 3369                     | 3250       | 2675           | 1973 |
| 1851                                                               | 116.4377494  | 120.8438726 | 153.0690511              |            |                |      |
| 112.5208521                                                        | 91.80611887  | 65.15303022 |                          |            |                |      |
| ENSG00000164754                                                    | 9661.315537  | 7720.697716 | 9446.407147              |            |                |      |
| 7662.022988                                                        | 6754.207147  | 5848.692727 | 8942.8068                |            |                |      |
| 6754.974288                                                        | 0.404824688  | 0.005210559 | 0.044299635              | RAD21      |                |      |
| 8                                                                  | 116845935    | 116874866   | -                        | 6192       |                |      |
| protein_coding RAD21 cohesin complex component [Source:HGNC        |              |             |                          |            |                |      |
| Symbol;Acc:HGNC:9811]                                              | -            | 10649       | 8724                     | 8126       | 7396           | 5917 |
| 6780                                                               | 84.21831789  | 66.75920405 | 81.64934722              |            |                |      |
| 66.37094458                                                        | 58.73784134  | 50.91312616 |                          |            |                |      |
| ENSG00000143198                                                    | 997.0688116  | 1099.16398  | 1235.728624              |            |                |      |
| 885.7530631                                                        | 811.6006898  | 590.045107  | 1110.653805              |            |                |      |
| 762.4662866                                                        | 0.543262174  | 0.005211574 | 0.044299635              | MGST3      |                |      |
| 1                                                                  | 165630861    | 165661796   | +                        | 8401       |                |      |
| protein_coding microsomal glutathione S-transferase 3 [Source:HGNC |              |             |                          |            |                |      |
| Symbol;Acc:HGNC:7064]                                              | -            | 1099        | 1242                     | 1063       | 855            | 711  |
| 684                                                                | 6.406124744  | 7.005143754 | 7.872435778              |            |                |      |
| 5.655189648                                                        | 5.202187201  | 3.785786648 |                          |            |                |      |
| ENSG00000139278                                                    | 1803.61492   | 1425.727192 | 1427.539746              |            |                |      |
| 1430.672491                                                        | 724.8473109  | 835.8972349 | 1552.293953              |            |                |      |
| 997.1390124                                                        | 0.638681756  | 0.005214448 | 0.044302772              | GLIPR1     |                |      |
| 12                                                                 | 75480680     | 75503853    | +                        | 6273       |                |      |
| protein_coding GLI pathogenesis related 1 [Source:HGNC             |              |             |                          |            |                |      |
| Symbol;Acc:HGNC:17001]                                             | -            | 1988        | 1611                     | 1228       | 1381           | 635  |
| 969                                                                | 15.51921594  | 12.16877031 | 12.17951307              |            |                |      |
| 12.23292843                                                        | 6.222226239  | 7.182564053 |                          |            |                |      |
| ENSG00000270562                                                    | 14.51601546  | 23.89486913 | 0                        | 0          | 0              |      |
| 0                                                                  | 12.8036282   | 0           | 6.115670274              | 0.00521854 |                |      |
| 0.044316254                                                        | AC097634.1   | 3           | 71584943                 |            |                |      |
| 71587409                                                           | +            | 2467        | lincRNA novel transcript | -          |                |      |
| 16                                                                 | 27           | 0           | 0                        | 0          | 0.317599285    |      |
| 0.518586319                                                        | 0            | 0           | 0                        | 0          |                |      |
| ENSG00000047644                                                    | 1077.814148  | 1072.614126 | 1345.002839              |            |                |      |
| 910.616307                                                         | 551.340553   | 865.2269624 | 1165.143704              |            |                |      |
| 775.7279408                                                        | 0.585366496  | 0.005234662 | 0.044427697              | WWC3       |                |      |

|                  |                                                        |             |             |             |                |
|------------------|--------------------------------------------------------|-------------|-------------|-------------|----------------|
| X                | 10015562                                               | 10144478    | +           | 7114        |                |
| protein_coding   | WWC family member 3 [Source:HGNC                       |             |             |             |                |
| Symbol;Acc:HGNC: | 29237]                                                 | -           | 1188        | 1212        | 1157 879 483   |
| 1003             | 8.177701676                                            | 8.07263283  | 10.11873785 |             |                |
| 6.865735334      | 4.173309847                                            | 6.555685192 |             |             |                |
| ENSG00000167363  | 104.3338611                                            | 96.46447169 | 110.4367067 |             |                |
| 281.7834306      | 216.8834474                                            | 127.6705787 | 103.7450132 |             |                |
| 208.7791522      | -1.007988357                                           | 0.005236687 | 0.044427697 |             | FN3K           |
| 17               | 82735575                                               | 82751197    | +           | 3872        |                |
| protein_coding   | fructosamine 3 kinase [Source:HGNC                     |             |             |             |                |
| Symbol;Acc:HGNC: | 24822]                                                 | -           | 115         | 109         | 95 272 190     |
| 148              | 1.454424478                                            | 1.333882547 | 1.526494006 |             |                |
| 3.903422841      | 3.016238038                                            | 1.777286266 |             |             |                |
| ENSG00000130830  | 1056.040124                                            | 977.9196442 | 1162.49165  |             |                |
| 793.5518671      | 835.5720182                                            | 492.5668949 | 1065.483806 |             |                |
| 707.2302601      | 0.59240295                                             | 0.005253502 | 0.044548995 |             | MPP1           |
| X                | 154778684                                              | 154821007   | -           | 5396        |                |
| protein_coding   | membrane palmitoylated protein 1 [Source:HGNC          |             |             |             |                |
| Symbol;Acc:HGNC: | 7219]                                                  | -           | 1164        | 1105        | 1000 766 732   |
| 571              | 10.56354588                                            | 9.7032401   | 11.53014863 |             |                |
| 7.888035787      | 8.338472489                                            | 4.920340809 |             |             |                |
| ENSG00000119681  | 1817.223685                                            | 1338.112672 | 1435.677188 |             |                |
| 1246.270099      | 1027.342645                                            | 992.8975411 | 1530.337848 |             |                |
| 1088.836762      | 0.491430537                                            | 0.005256463 | 0.04455274  |             | LTBP2          |
| 14               | 74498170                                               | 74612378    | -           | 9091        |                |
| protein_coding   | latent transforming growth factor beta binding protein |             |             |             |                |
| 2 [Source:HGNC   | Symbol;Acc:HGNC:                                       | 6715]       | -           | 2003        | 1512 1235      |
| 1203             | 900                                                    | 1151        | 10.78941692 | 7.880732282 |                |
| 8.45205173       | 7.353024503                                            | 6.085247013 | 5.887008786 |             |                |
| ENSG00000149269  | 1530.53238                                             | 1488.561848 | 1456.602037 |             |                |
| 2072.972958      | 2174.541933                                            | 1727.003369 | 1491.898755 |             |                |
| 1991.506087      | -0.416094684                                           | 0.005265251 | 0.044587091 |             | PAK1           |
| 11               | 77321707                                               | 77474635    | -           | 6299        |                |
| protein_coding   | p21 (RAC1) activated kinase 1 [Source:HGNC             |             |             |             |                |
| Symbol;Acc:HGNC: | 8590]                                                  | -           | 1687        | 1682        | 1253 2001 1905 |
| 2002             | 13.11511665                                            | 12.65263046 | 12.37617123 |             |                |
| 17.65174008      | 18.5896294                                             | 14.77826612 |             |             |                |
| ENSG00000197956  | 4597.947896                                            | 8144.610394 | 11487.74248 |             |                |
| 4055.816658      | 4168.728156                                            | 3950.024188 | 8076.766925 |             |                |
| 4058.189667      | 0.992880139                                            | 0.005267635 | 0.044587091 |             | S100A6         |
| 1                | 153534599                                              | 153536244   | -           | 971         |                |
| protein_coding   | S100 calcium binding protein A6 [Source:HGNC           |             |             |             |                |
| Symbol;Acc:HGNC: | 10496]                                                 | -           | 5068        | 9203        | 9882 3915 3652 |
| 4579             | 255.5912958                                            | 449.093359  | 633.1876947 |             |                |
| 224.0394925      | 231.1845991                                            | 219.2716233 |             |             |                |
| ENSG00000106211  | 5494.31185                                             | 7814.507202 | 8151.391449 |             |                |
| 7564.64195       | 10717.46677                                            | 12566.06297 | 7153.4035   |             |                |
| 10282.7239       | -0.523672457                                           | 0.005270037 | 0.044587091 |             | HSPB1          |
| 7                | 76302544                                               | 76304295    | +           | 1634        |                |
| protein_coding   | heat shock protein family B (small) member 1           |             |             |             |                |

|                                    |                                                       |                        |                       |                |
|------------------------------------|-------------------------------------------------------|------------------------|-----------------------|----------------|
| [Source:HGNC Symbol;Acc:HGNC:5246] | -                                                     | 6056                   | 8830                  | 7012           |
| 7302                               | 9389                                                  | 14567                  | 181.4940943           | 256.0560798    |
| 266.9910491                        | 248.3143512                                           | 353.1950815            | 414.5234329           |                |
| ENSG00000053501                    | 434.5732127                                           | 490.2873148            | 598.6831997           |                |
| 724.1419779                        | 652.9333257                                           | 908.3589147            | 507.8479091           |                |
| 761.8114061                        | -0.587361612                                          | 0.005270598            | 0.044587091           | USE1           |
| 19                                 | 17215346                                              | 17219829               | + 2431                |                |
| protein_coding                     | unconventional SNARE in the ER 1                      | [Source:HGNC           |                       |                |
| Symbol;Acc:HGNC:30882]             | -                                                     | 479                    | 554                   | 515 699 572    |
| 1053                               | 9.64893183                                            | 10.79819701            | 13.18041597           |                |
| 15.97733203                        | 14.46300146                                           | 20.14069397            |                       |                |
| ENSG00000198929                    | 13.60876449                                           | 15.92991276            | 2.3249833             | 0              |
| 0                                  | 0                                                     | 10.62122018            | 0                     | 5.846234921    |
| 0.005296563                        | 0.044785326                                           | NOS1AP 1               | 162069774             |                |
| 162370475                          | + 7771                                                | protein_coding         | nitric oxide synthase |                |
| 1 adaptor protein                  | [Source:HGNC                                          | Symbol;Acc:HGNC:16859] | -                     | 15             |
| 18                                 | 2                                                     | 0                      | 0                     | 0.094524205    |
| 0.109754425                        | 0.016012529                                           | 0                      | 0                     | 0              |
| ENSG00000106554                    | 1882.545754                                           | 1876.189725            | 2035.522879           |                |
| 1500.082381                        | 1364.082735                                           | 1544.123891            | 1931.419453           |                |
| 1469.429669                        | 0.39378479                                            | 0.005307219            | 0.044853987           | CHCHD3         |
| 7                                  | 132784868                                             | 133082088              | - 3428                |                |
| protein_coding                     | coiled-coil-helix-coiled-coil-helix domain containing |                        |                       |                |
| 3 [Source:HGNC                     | Symbol;Acc:HGNC:21906]                                | -                      | 2075                  | 2120 1751      |
| 1448                               | 1195                                                  | 1790                   | 29.64189546           | 29.30363448    |
| 31.77987462                        | 23.4714431                                            | 21.42764547            | 24.2796955            |                |
| ENSG00000134905                    | 1685.672295                                           | 1922.209473            | 1754.1999             |                |
| 2107.159919                        | 2519.272465                                           | 2455.070723            | 1787.360556           |                |
| 2360.501035                        | -0.401146155                                          | 0.005311552            | 0.044869171           | CARS2          |
| 13                                 | 110641412                                             | 110713603              | - 10460               |                |
| protein_coding                     | "cysteinyl-tRNA synthetase 2, mitochondrial           |                        |                       |                |
| [Source:HGNC                       | Symbol;Acc:HGNC:25695]"                               | -                      | 1858                  | 2172 1509      |
| 2034                               | 2207                                                  | 2846                   | 8.698466769           | 9.839081936    |
| 8.975618848                        | 10.80516263                                           | 12.96934397            | 12.65127306           |                |
| ENSG00000117501                    | 1.814501932                                           | 1.769990306            | 2.3249833             |                |
| 23.82727538                        | 9.131934625                                           | 27.60444945            | 1.969825179           |                |
| 20.18788649                        | -3.369797681                                          | 0.005316631            | 0.044890636           | MROH9          |
| 1                                  | 170935471                                             | 171064765              | + 3831                |                |
| protein_coding                     | maestro heat like repeat family member 9              | [Source:HGNC           |                       |                |
| Symbol;Acc:HGNC:26287]             | -                                                     | 2                      | 2                     | 2 23 8         |
| 32                                 | 0.025565043                                           | 0.024736844            | 0.032480648           |                |
| 0.333601295                        | 0.128358666                                           | 0.38839072             |                       |                |
| ENSG00000176407                    | 1268.33685                                            | 1323.952749            | 1476.364395           |                |
| 1998.383227                        | 1700.822824                                           | 1737.355037            | 1356.217998           |                |
| 1812.187029                        | -0.418630352                                          | 0.005349006            | 0.045142447           | KCMF1          |
| 2                                  | 84971093                                              | 85059472               | + 7968                |                |
| protein_coding                     | potassium channel modulatory factor 1                 | [Source:HGNC           |                       |                |
| Symbol;Acc:HGNC:20589]             | -                                                     | 1398                   | 1496                  | 1270 1929 1490 |
| 2014                               | 8.591846898                                           | 8.89628544             | 9.916564526           |                |
| 13.4522505                         | 11.49434698                                           | 11.75279494            |                       |                |

|                                                                     |                                                       |                |                        |        |
|---------------------------------------------------------------------|-------------------------------------------------------|----------------|------------------------|--------|
| ENSG00000135845                                                     | 703.1194986                                           | 747.8209044    | 654.4827989            |        |
| 511.7684365                                                         | 483.9925351                                           | 486.5284215    | 701.807734             |        |
| 494.0964644                                                         | 0.506844645                                           | 0.005393126    | 0.045493085            | PIGC   |
| 1                                                                   | 172370189                                             | 172444086      | - 5225                 |        |
| protein_coding                                                      | phosphatidylinositol glycan anchor biosynthesis class |                |                        |        |
| C [Source:HGNC Symbol;Acc:HGNC:8960]                                | -                                                     | 775            | 845                    | 563    |
| 494                                                                 | 424 564                                               | 7.263469066    | 7.66296523             |        |
| 6.703921908                                                         | 5.253547917                                           | 4.988005481    | 5.01907664             |        |
| ENSG00000175606                                                     | 937.1902479                                           | 1183.23852     | 956.7306279            |        |
| 1366.442445                                                         | 1467.958491                                           | 1371.596082    | 1025.719798            |        |
| 1401.999006                                                         | -0.450182672                                          | 0.005396649    | 0.045496572            | TMEM70 |
| 8                                                                   | 73972437                                              | 73982783       | + 2982                 |        |
| protein_coding                                                      | transmembrane protein 70 [Source:HGNC                 |                |                        |        |
| Symbol;Acc:HGNC:26050]                                              | -                                                     | 1033 1337      | 823 1319               | 1286   |
| 1590                                                                | 16.96373057                                           | 21.24468074    | 17.17113658            |        |
| 24.57815055                                                         | 26.50822753                                           | 24.79251036    |                        |        |
| ENSG00000124541                                                     | 2153.813793                                           | 2339.04219     | 2242.446393            |        |
| 2616.856418                                                         | 3128.829101                                           | 3020.961937    | 2245.100792            |        |
| 2922.215819                                                         | -0.380243901                                          | 0.005398683    | 0.045496572            | RRP36  |
| 6                                                                   | 43021645                                              | 43034156       | + 2212                 |        |
| protein_coding                                                      | ribosomal RNA processing 36 [Source:HGNC              |                |                        |        |
| Symbol;Acc:HGNC:21374]                                              | -                                                     | 2374 2643      | 1929 2526              | 2741   |
| 3502                                                                | 52.55623859                                           | 56.61590858    | 54.25677197            |        |
| 63.45418453                                                         | 76.16777568                                           | 73.61427466    |                        |        |
| ENSG00000101003                                                     | 1248.377329                                           | 1139.873757    | 1196.203908            |        |
| 1061.867707                                                         | 739.6867047                                           | 568.4791308    | 1194.818331            |        |
| 790.0111809                                                         | 0.597596267                                           | 0.005422391    | 0.045674609            | GINS1  |
| 20                                                                  | 25407727                                              | 25452628       | + 4068                 |        |
| protein_coding                                                      | GINS complex subunit 1 [Source:HGNC                   |                |                        |        |
| Symbol;Acc:HGNC:28980]                                              | -                                                     | 1376 1288      | 1029 1025              | 648    |
| 659                                                                 | 16.56403629                                           | 15.00242138    | 15.73770054            |        |
| 14.00086812                                                         | 9.791324                                              | 7.532436661    |                        |        |
| ENSG00000069188                                                     | 15.42326642                                           | 7.964956378    | 6.974949899            | 0      |
| 0                                                                   | 0 10.12105757                                         | 0              | 5.774008772            |        |
| 0.005428721                                                         | 0.04570616                                            | SDK2 17        | 73334384               |        |
| 73644089                                                            | - 11607                                               | protein_coding | sidekick cell adhesion |        |
| molecule 2 [Source:HGNC Symbol;Acc:HGNC:19308]                      | -                                                     | 17             | 9                      |        |
| 6                                                                   | 0 0                                                   | 0 0.071722864  | 0.03674083             |        |
| 0.032161635                                                         | 0 0                                                   | 0 0            |                        |        |
| ENSG00000125885                                                     | 1694.744804                                           | 1323.067754    | 1107.854542            |        |
| 1179.968116                                                         | 777.355935                                            | 781.550975     | 1375.222367            |        |
| 912.9583419                                                         | 0.59171935                                            | 0.005442114    | 0.04579712             | MCM8   |
| 20                                                                  | 5950652 5998977                                       | + 7691         | protein_coding         |        |
| minichromosome maintenance 8 homologous recombination repair factor |                                                       |                |                        |        |
| [Source:HGNC Symbol;Acc:HGNC:16147]                                 | -                                                     | 1868           | 1495                   | 953    |
| 1139                                                                | 681 906                                               | 11.89385786    | 9.210534256            |        |
| 7.709335321                                                         | 8.229111681                                           | 5.442665711    | 5.477424556            |        |
| ENSG00000177084                                                     | 3847.651347                                           | 3519.625724    | 3073.627922            |        |
| 2684.19437                                                          | 2679.081321                                           | 2673.318401    | 3480.301664            |        |
| 2678.864697                                                         | 0.377907448                                           | 0.005468645    | 0.045998506            | POLE   |

|                                                                                                          |                                                                                               |             |                |                                                                       |                  |
|----------------------------------------------------------------------------------------------------------|-----------------------------------------------------------------------------------------------|-------------|----------------|-----------------------------------------------------------------------|------------------|
| 12                                                                                                       | 132623753                                                                                     | 132687365   | -              | 16609                                                                 |                  |
| protein_coding                                                                                           | "DNA polymerase epsilon, catalytic subunit [Source:HGNC Symbol;Acc:HGNC:9177]"                |             |                |                                                                       |                  |
| 2591                                                                                                     | 2347                                                                                          | 3099        | -              | 4241                                                                  | 3977 2644        |
| 9.904323392                                                                                              | 8.668340681                                                                                   | 8.685942793 | 12.50412973    | 11.34588943                                                           |                  |
| ENSG00000135763                                                                                          | 575.1971124                                                                                   | 576.1318447 | 8.675791559    | 573.1083834                                                           |                  |
| 780.0842767                                                                                              | 690.602556                                                                                    | 1104.177978 | 574.8124468    |                                                                       |                  |
| 858.2882702                                                                                              | -0.579615896                                                                                  | 0.005474771 | 0.046015266    |                                                                       | URB2             |
| 1                                                                                                        | 229626234                                                                                     | 229660199   | +              | 6001                                                                  |                  |
| protein_coding                                                                                           | URB2 ribosome biogenesis 2 homolog (S. cerevisiae) [Source:HGNC Symbol;Acc:HGNC:28967]        |             |                |                                                                       |                  |
| 753                                                                                                      | 605                                                                                           | 1280        | -              | 634                                                                   | 651 493          |
| 5.11128549                                                                                               | 6.972417642                                                                                   | 6.196965925 | 5.173617473    | 5.140244803                                                           |                  |
| ENSG00000177707                                                                                          | 1715.611577                                                                                   | 1402.717318 | 9.917846012    | 1556.576319                                                           |                  |
| 1406.845216                                                                                              | 950.8626929                                                                                   | 727.2047152 | 1558.301738    |                                                                       |                  |
| 1028.304208                                                                                              | 0.600284316                                                                                   | 0.00547584  | 0.046015266    |                                                                       |                  |
| NECTIN3                                                                                                  | 3                                                                                             | 111070071   | 111275563      | +                                                                     | 6184             |
| protein_coding                                                                                           | nectin cell adhesion molecule 3 [Source:HGNC Symbol;Acc:HGNC:17664]                           |             |                |                                                                       |                  |
| 843                                                                                                      | 14.97444488                                                                                   | 12.14468421 | 1891           | 1585                                                                  | 1339 1358 833    |
| 12.20231783                                                                                              | 8.279857848                                                                                   | 6.338538198 | 13.47156164    |                                                                       |                  |
| ENSG00000170989                                                                                          | 9.979760626                                                                                   | 10.61994184 | 9.299933199    |                                                                       | 0                |
| 0                                                                                                        | 0                                                                                             | 9.966545221 | 0              | 5.750597865                                                           |                  |
| 0.005512301                                                                                              | 0.046281729                                                                                   | S1PR1       | 1              | 101236865                                                             |                  |
| 101243713                                                                                                | +                                                                                             | 5223        | protein_coding | sphingosine-1-phosphate receptor 1 [Source:HGNC Symbol;Acc:HGNC:3165] | - 11             |
| 12                                                                                                       | 8                                                                                             | 0           | 0              | 0                                                                     | 0.103133877      |
| 0.108864846                                                                                              | 0.095296469                                                                                   | 0           | 0              | 0                                                                     |                  |
| ENSG00000069424                                                                                          | 342.0336142                                                                                   | 452.2325232 | 403.3846025    |                                                                       |                  |
| 534.5597434                                                                                              | 711.149409                                                                                    | 569.3417699 | 399.2169133    |                                                                       |                  |
| 605.0169741                                                                                              | -0.599103781                                                                                  | 0.005515393 | 0.046281729    |                                                                       | KCNAB2           |
| 1                                                                                                        | 5991466                                                                                       | 6101193     | +              | 9534                                                                  | protein_coding   |
| potassium voltage-gated channel subfamily A regulatory beta subunit 2 [Source:HGNC Symbol;Acc:HGNC:6229] |                                                                                               |             | -              | 377                                                                   | 511 347          |
| 516                                                                                                      | 623                                                                                           | 660         | 1.936399163    | 2.539640203                                                           |                  |
| 2.264441856                                                                                              | 3.007368162                                                                                   | 4.016615495 | 3.218843087    |                                                                       |                  |
| ENSG00000073969                                                                                          | 1574.987677                                                                                   | 1179.698539 | 1520.539078    |                                                                       |                  |
| 1220.370887                                                                                              | 938.3062828                                                                                   | 684.9354019 | 1425.075098    |                                                                       |                  |
| 947.8708572                                                                                              | 0.588791269                                                                                   | 0.005515399 | 0.046281729    |                                                                       | NSF              |
| 17                                                                                                       | 46590669                                                                                      | 46757464    | +              | 5005                                                                  |                  |
| protein_coding                                                                                           | "N-ethylmaleimide sensitive factor, vesicle fusing ATPase [Source:HGNC Symbol;Acc:HGNC:8016]" |             |                |                                                                       |                  |
| 1308                                                                                                     | 1178                                                                                          | 822         | 794            | 16.98534305                                                           | 12.61980105 1333 |
| 16.25962439                                                                                              | 13.07835893                                                                                   | 10.09520392 | 7.376450608    |                                                                       |                  |
| ENSG00000058063                                                                                          | 1691.115801                                                                                   | 1422.187211 | 1497.289245    |                                                                       |                  |
| 1199.651517                                                                                              | 1127.793926                                                                                   | 1121.430759 | 1536.864086    |                                                                       |                  |
| 1149.625401                                                                                              | 0.418976971                                                                                   | 0.005531438 | 0.04639431     |                                                                       | ATP11B           |
| 3                                                                                                        | 182793500                                                                                     | 182921635   | +              | 9196                                                                  |                  |
| protein_coding                                                                                           | ATPase phospholipid transporting 11B (putative) [Source:HGNC Symbol;Acc:HGNC:13553]           |             |                |                                                                       |                  |
|                                                                                                          |                                                                                               |             | -              | 1864                                                                  | 1607 1288        |



|                                                                                                        |                                                        |             |             |             |                  |
|--------------------------------------------------------------------------------------------------------|--------------------------------------------------------|-------------|-------------|-------------|------------------|
| 1158                                                                                                   | 988                                                    | 1300        | 9.92603104  | 8.280248201 |                  |
| 8.71412423                                                                                             | 6.997157352                                            |             | 6.603973809 | 6.573178224 |                  |
| ENSG00000260260                                                                                        | 40.82629347                                            |             | 87.61452016 | 83.69939879 |                  |
| 26.93518087                                                                                            | 21.68834474                                            |             | 21.56597613 | 70.71340414 |                  |
| 23.39650058                                                                                            | 1.594950946                                            |             | 0.005539789 | 0.046422769 | SNHG19           |
| 16                                                                                                     | 2154797                                                | 2155358     | -           | 342         | lincRNA small    |
| nucleolar RNA host gene 19                                                                             | [Source:HGNC Symbol;Acc:HGNC:49574] -                  |             |             |             |                  |
| 45                                                                                                     | 99                                                     | 72          | 26          | 19          | 25               |
| 13.71625433                                                                                            |                                                        | 13.09824884 |             | 4.224344086 | 3.414875346      |
| 3.398951133                                                                                            |                                                        |             |             |             |                  |
| ENSG00000129824                                                                                        | 3663.479401                                            |             | 3922.298519 | 3768.797929 |                  |
| 4590.376401                                                                                            | 4962.064977                                            |             | 4762.630169 | 3784.858616 |                  |
| 4771.690516                                                                                            | -0.334194503                                           |             | 0.005540079 | 0.046422769 | RPS4Y1           |
| Y                                                                                                      | 2841486                                                | 2932000     | +           | 2275        | protein_coding   |
| ribosomal protein S4 Y-linked 1                                                                        | [Source:HGNC Symbol;Acc:HGNC:10425]                    |             |             |             |                  |
| -                                                                                                      | 4038                                                   | 4432        | 3242        | 4431        | 4347 5521        |
| 86.91877505                                                                                            | 92.30915842                                            |             | 88.66219036 | 108.2261957 |                  |
| 117.4506973                                                                                            | 112.8411138                                            |             |             |             |                  |
| ENSG00000268628                                                                                        | 3.629003864                                            |             | 27.43484975 | 2.3249833   | 0                |
| 0                                                                                                      | 0                                                      | 11.1296123  | 0           | 5.913752349 |                  |
| 0.005551019                                                                                            | 0.046484611                                            |             | AL121761.1  | 20          | 19756390         |
| 19758037                                                                                               | -                                                      |             | 1648        | lincRNA     | novel transcript |
| -                                                                                                      | 4                                                      | 31          | 2           | 0           | 0 0              |
| 0.118858835                                                                                            | 0.891314409                                            |             | 0.075505682 | 0           | 0 0              |
| ENSG00000226380                                                                                        | 29.03203091                                            |             | 61.94966072 | 15.11239145 |                  |
| 121.2083139                                                                                            | 65.06503421                                            |             | 128.5332177 | 35.36469436 |                  |
| 104.935522                                                                                             | -1.561610448                                           |             | 0.005552715 | 0.046484611 | LINC-            |
| PINT 7                                                                                                 | 130876809                                              |             | 130913310   | -           | 6619             |
| lincRNA "long intergenic non-protein coding RNA, p53 induced transcript [Source:NCBI gene;Acc:378805]" | - 32 70                                                |             |             |             |                  |
| 13                                                                                                     | 117                                                    | 57          | 149         | 0.236747979 | 0.501108881      |
| 0.122196233                                                                                            | 0.982212653                                            |             | 0.529334054 | 1.046706462 |                  |
| ENSG00000092199                                                                                        | 10104.05401                                            |             | 11042.08453 | 12542.12241 |                  |
| 8816.091892                                                                                            | 8740.402928                                            |             | 8948.154817 | 11229.42031 |                  |
| 8834.883212                                                                                            | 0.345868756                                            |             | 0.005569451 | 0.046602654 | HNRNPC           |
| 14                                                                                                     | 21209136                                               |             | 21269494    | -           | 7309             |
| protein_coding heterogeneous nuclear ribonucleoprotein C (C1/C2)                                       | [Source:HGNC Symbol;Acc:HGNC:5035] - 11137 12477 10789 |             |             |             |                  |
| 8510                                                                                                   | 7657                                                   | 10373       | 74.61719882 | 80.88698617 |                  |
| 91.83961994                                                                                            | 64.69692536                                            |             | 64.39439176 | 65.98989451 |                  |
| ENSG00000172936                                                                                        | 1057.854626                                            |             | 1185.00851  | 1009.042752 |                  |
| 1292.888682                                                                                            | 1795.566646                                            |             | 1439.744567 | 1083.968629 |                  |
| 1509.399965                                                                                            | -0.476827148                                           |             | 0.005610954 | 0.046927738 | MYD88            |
| 3                                                                                                      | 38138478                                               |             | 38143022    | +           | 3989             |
| protein_coding "MYD88, innate immune signal transduction adaptor [Source:HGNC Symbol;Acc:HGNC:7562]"   | - 1166 1339 868                                        |             |             |             |                  |
| 1248                                                                                                   | 1573                                                   | 1669        | 14.31407201 | 15.90534089 |                  |
| 13.53825018                                                                                            | 17.38451554                                            |             | 24.23885198 | 19.45464536 |                  |
| ENSG00000159202                                                                                        | 3746.946489                                            |             | 4412.585833 | 4073.370741 |                  |
| 4487.81552                                                                                             | 5704.034665                                            |             | 6009.143589 | 4077.634355 |                  |

|                        |                                                        |             |             |        |
|------------------------|--------------------------------------------------------|-------------|-------------|--------|
| 5400.331258            | -0.405378437                                           | 0.005614151 | 0.046932287 | UBE2Z  |
| 17                     | 48908369                                               | 48929056    | + 5753      |        |
| protein_coding         | ubiquitin conjugating enzyme E2 Z [Source:HGNC         |             |             |        |
| Symbol;Acc:HGNC:25847] | -                                                      | 4130 4986   | 3504 4332   | 4997   |
| 6966                   | 35.15477812                                            | 41.06618327 | 37.89453394 |        |
| 41.84139134            | 53.39029686                                            | 56.30151927 |             |        |
| ENSG00000183137        | 367.4366412                                            | 310.6332987 | 352.2349699 |        |
| 200.977888             | 247.7037267                                            | 188.0553119 | 343.43497   |        |
| 212.2456422            | 0.695855324                                            | 0.005624595 | 0.046979718 |        |
| CEP57L1 6              | 109095110                                              | 109163932   | + 6432      |        |
| protein_coding         | centrosomal protein 57 like 1 [Source:HGNC             |             |             |        |
| Symbol;Acc:HGNC:21561] | -                                                      | 405 351     | 303 194     | 217    |
| 218                    | 3.0834554                                              | 2.585755884 | 2.930916456 |        |
| 1.675975778            | 2.073772248                                            | 1.575946522 |             |        |
| ENSG00000075391        | 1873.473245                                            | 1831.054972 | 1393.827488 |        |
| 2347.504609            | 2143.721653                                            | 2411.076132 | 1699.451902 |        |
| 2300.767465            | -0.436480754                                           | 0.005627377 | 0.046979718 | RASAL2 |
| 1                      | 178094141                                              | 178484147   | + 16044     |        |
| protein_coding         | RAS protein activator like 2 [Source:HGNC              |             |             |        |
| Symbol;Acc:HGNC:9874]  | -                                                      | 2065 2069   | 1199 2266   | 1878   |
| 2795                   | 6.302837151                                            | 6.110465244 | 4.649576273 |        |
| 7.848005448            | 7.194991659                                            | 8.100282719 |             |        |
| ENSG00000259330        | 409.1701857                                            | 437.1876056 | 437.0968604 |        |
| 318.0423279            | 232.8643329                                            | 274.3192164 | 427.8182172 |        |
| 275.0752924            | 0.636322759                                            | 0.005631214 | 0.046979718 | INAFM2 |
| 15                     | 40323664                                               | 40326715    | + 3052      |        |
| protein_coding         | InaF motif containing 2 [Source:HGNC                   |             |             |        |
| Symbol;Acc:HGNC:35165] | -                                                      | 451 494     | 376 307     | 204    |
| 318                    | 7.236368861                                            | 7.669531941 | 7.664964755 |        |
| 5.589408999            | 4.108591831                                            | 4.84477496  |             |        |
| ENSG00000034152        | 1406.238997                                            | 1795.655166 | 1613.53841  |        |
| 1878.210881            | 2131.165243                                            | 2670.730484 | 1605.144191 |        |
| 2226.702203            | -0.4725912                                             | 0.00563273  | 0.046979718 | MAP2K3 |
| 17                     | 21284672                                               | 21315240    | + 3783      |        |
| protein_coding         | mitogen-activated protein kinase kinase 3 [Source:HGNC |             |             |        |
| Symbol;Acc:HGNC:6843]  | -                                                      | 1550 2029   | 1388 1813   | 1867   |
| 3096                   | 20.06430128                                            | 25.41394856 | 22.82758515 |        |
| 26.63014348            | 30.33579193                                            | 38.05358949 |             |        |
| ENSG00000151466        | 413.7064405                                            | 253.1086138 | 288.2979292 |        |
| 252.7763128            | 130.1300684                                            | 94.89029498 | 318.3709945 |        |
| 159.2655587            | 1.001216119                                            | 0.005633104 | 0.046979718 | SCLT1  |
| 4                      | 128864921                                              | 129093607   | - 8292      |        |
| protein_coding         | sodium channel and clathrin linker 1 [Source:HGNC      |             |             |        |
| Symbol;Acc:HGNC:26406] | -                                                      | 456 286     | 248 244     | 114    |
| 110                    | 2.69298685                                             | 1.634305268 | 1.860798015 |        |
| 1.635093442            | 0.845070455                                            | 0.616828469 |             |        |
| ENSG00000149636        | 772.070572                                             | 724.8110304 | 723.0698062 |        |
| 654.7320888            | 372.126336                                             | 384.7370142 | 739.9838029 |        |
| 470.531813             | 0.653538585                                            | 0.005637456 | 0.046993854 | DSN1   |
| 20                     | 36751791                                               | 36773818    | - 2739      |        |



|                                          |                                                       |                                            |             |             |        |
|------------------------------------------|-------------------------------------------------------|--------------------------------------------|-------------|-------------|--------|
| 0.687197647                              | 1.389705793                                           | 1.114146625                                |             |             |        |
| ENSG00000225706                          | 8.165258694                                           | 8.849951531                                | 12.78740815 | 0           |        |
| 0                                        | 0                                                     | 9.934206125                                | 0           | 5.743802236 |        |
| 0.005714538                              | 0.047479788                                           | PTPRD-AS1                                  | 9           | 8858130     |        |
| 8862255 +                                | 2494                                                  | lincRNA PTPRD antisense RNA 1 [Source:HGNC |             |             |        |
| Symbol;Acc:HGNC:49753]                   | -                                                     | 9                                          | 10          | 11          | 0      |
| 0                                        | 0.176715541                                           | 0.189989671                                | 0.27441199  | 0           |        |
| 0                                        | 0                                                     |                                            |             |             |        |
| ENSG00000110330                          | 2954.009145                                           | 2429.311695                                | 2726.042919 |             |        |
| 2011.850817                              | 2199.654753                                           | 1988.382999                                | 2703.121253 |             |        |
| 2066.629523                              | 0.387508718                                           | 0.005733258                                | 0.047597222 |             | BIRC2  |
| 11                                       | 102347211                                             | 102378670                                  | +           | 4532        |        |
| protein_coding                           | baculoviral IAP repeat containing 2 [Source:HGNC      |                                            |             |             |        |
| Symbol;Acc:HGNC:590]                     | -                                                     | 3256                                       | 2745        | 2345        | 1942   |
| 2305                                     | 35.18221502                                           | 28.6998012                                 | 32.19287716 |             | 1927   |
| 23.8106564                               | 26.13600314                                           | 23.64896                                   |             |             |        |
| ENSG00000119900                          | 1627.608233                                           | 1243.41819                                 | 1531.001503 |             |        |
| 1156.14084                               | 1066.153368                                           | 976.5073993                                | 1467.342642 |             |        |
| 1066.267202                              | 0.460726444                                           | 0.005735151                                | 0.047597222 |             | OGFRL1 |
| 6                                        | 71288803                                              | 71308950                                   | +           | 9075        |        |
| protein_coding                           | opioid growth factor receptor like 1 [Source:HGNC     |                                            |             |             |        |
| Symbol;Acc:HGNC:21378]                   | -                                                     | 1794                                       | 1405        | 1317        | 1116   |
| 1132                                     | 9.680649329                                           | 7.335946093                                | 9.029131703 |             | 934    |
| 6.833286102                              | 6.326268243                                           | 5.800037631                                |             |             |        |
| ENSG00000136044                          | 1450.694295                                           | 1439.887114                                | 1560.063794 |             |        |
| 2100.944108                              | 1904.008369                                           | 1833.107971                                | 1483.548401 |             |        |
| 1946.020149                              | -0.391646951                                          | 0.005736953                                | 0.047597222 |             | APPL2  |
| 12                                       | 105173296                                             | 105236238                                  | -           | 5124        |        |
| protein_coding                           | "adaptor protein, phosphotyrosine interacting with PH |                                            |             |             |        |
| domain and leucine zipper 2 [Source:HGNC | Symbol;Acc:HGNC:18242]"                               |                                            |             |             |        |
| -                                        | 1599                                                  | 1627                                       | 1342        | 2028        | 1668   |
| 15.2815718                               | 15.04543929                                           | 16.29484529                                | 21.99231125 |             |        |
| 20.0094101                               | 19.28327663                                           |                                            |             |             |        |
| ENSG00000182324                          | 148.7891584                                           | 110.6243941                                | 80.21192384 |             |        |
| 137.7838098                              | 198.6195781                                           | 405.4403513                                | 113.2084921 |             |        |
| 247.2812464                              | -1.12680606                                           | 0.005739436                                | 0.047597222 |             | KCNJ14 |
| 19                                       | 48455509                                              | 48466980                                   | +           | 4340        |        |
| protein_coding                           | potassium voltage-gated channel subfamily J member 14 |                                            |             |             |        |
| [Source:HGNC                             | Symbol;Acc:HGNC:6260]                                 | -                                          | 164         | 125         | 69     |
| 133                                      | 174                                                   | 470                                        | 1.85047321  | 1.364729956 |        |
| 0.98915923                               | 1.702840438                                           | 2.46437548                                 | 5.035459955 |             |        |
| ENSG00000173812                          | 8997.20783                                            | 11444.75732                                | 12186.39997 |             |        |
| 14330.55219                              | 13316.64367                                           | 14919.34229                                | 10876.12171 |             |        |
| 14188.84605                              | -0.383724626                                          | 0.005753681                                | 0.047692997 |             | EIF1   |
| 17                                       | 41688885                                              | 41692668                                   | +           | 3623        |        |
| protein_coding                           | eukaryotic translation initiation factor 1            |                                            |             |             |        |
| [Source:HGNC                             | Symbol;Acc:HGNC:3249]                                 | -                                          | 9917        | 12932       | 10483  |
| 13833                                    | 11666                                                 | 17295                                      | 134.041927  | 169.1312282 |        |
| 180.0213849                              | 212.1583292                                           | 197.9251571                                | 221.9643618 |             |        |
| ENSG00000206503                          | 2022.262403                                           | 2808.974616                                | 3832.73497  |             |        |

|                 |                                                                                           |             |             |             |
|-----------------|-------------------------------------------------------------------------------------------|-------------|-------------|-------------|
| 1421.348775     | 2542.102301                                                                               | 1580.354731 | 2887.990663 |             |
| 1847.935269     | 0.644221991                                                                               | 0.005759383 | 0.047710658 | HLA-A       |
| 6               | 29941260                                                                                  | 29945884    | + 2710      |             |
| protein_coding  | "major histocompatibility complex, class I, A [Source:HGNC Symbol;Acc:HGNC:4931]"         |             |             |             |
|                 | -                                                                                         | 2229        | 3174        | 3297        |
| 1372            | 2227                                                                                      | 1832        | 40.27814501 | 55.49630552 |
| 75.69313674     | 28.13175744                                                                               | 50.51243288 | 31.43309873 |             |
| ENSG00000184378 | 41.73354444                                                                               | 53.09970919 | 26.73730795 |             |
| 70.44585765     | 113.007691                                                                                | 125.0826616 | 40.52352052 |             |
| 102.8454034     | -1.338243358                                                                              | 0.005763217 | 0.047710658 | ACTRT3      |
| 3               | 169766921                                                                                 | 169769895   | - 2005      |             |
| protein_coding  | actin related protein T3 [Source:HGNC Symbol;Acc:HGNC:24022]                              |             |             |             |
|                 | -                                                                                         | 46          | 60          | 23          |
|                 |                                                                                           |             |             | 68          |
| 145             | 1.123497572                                                                               | 1.417957827 | 0.713707574 | 99          |
| 1.884545292     | 3.035066267                                                                               | 3.362673051 |             |             |
| ENSG00000087302 | 1567.729669                                                                               | 1691.225738 | 1806.512024 |             |
| 1341.579201     | 1122.086467                                                                               | 1317.249822 | 1688.489144 |             |
| 1260.305163     | 0.421218942                                                                               | 0.005767299 | 0.047710658 | RTRAF       |
| 14              | 51989475                                                                                  | 52010691    | + 8323      |             |
| protein_coding  | "RNA transcription, translation and transport factor [Source:HGNC Symbol;Acc:HGNC:23169]" |             |             |             |
|                 | -                                                                                         | 1728        | 1911        | 1554        |
| 1295            | 983                                                                                       | 1527        | 10.16699306 | 10.87945733 |
| 11.61657141     | 8.645734952                                                                               | 7.2597386   | 8.530807863 |             |
| ENSG00000173705 | 158.768919                                                                                | 176.1140355 | 259.2356379 |             |
| 96.34507003     | 130.1300684                                                                               | 64.6979284  | 198.0395308 |             |
| 97.05768894     | 1.031385775                                                                               | 0.005768749 | 0.047710658 | SUSD5       |
| 3               | 33150042                                                                                  | 33219215    | - 5008      |             |
| protein_coding  | sushi domain containing 5 [Source:HGNC Symbol;Acc:HGNC:29061]                             |             |             |             |
|                 | -                                                                                         | 175         | 199         | 223         |
|                 |                                                                                           |             |             | 93          |
| 75              | 1.711206464                                                                               | 1.882847721 | 2.770431327 | 114         |
| 1.031883509     | 1.39922608                                                                                | 0.696350612 |             |             |
| ENSG00000172340 | 1809.058426                                                                               | 1643.435999 | 1741.412492 |             |
| 1519.765782     | 1187.151501                                                                               | 1018.776712 | 1731.302306 |             |
| 1241.897999     | 0.479749042                                                                               | 0.005769297 | 0.047710658 | SUCLG2      |
| 3               | 67360460                                                                                  | 67654614    | - 3090      |             |
| protein_coding  | succinate-CoA ligase GDP-forming beta subunit [Source:HGNC Symbol;Acc:HGNC:11450]         |             |             |             |
|                 | -                                                                                         | 1994        | 1857        | 1498        |
| 1467            | 1040                                                                                      | 1181        | 31.60060214 | 28.47605776 |
| 30.16200312     | 26.38053981                                                                               | 20.68817685 | 17.7714325  |             |
| ENSG00000277203 | 260.3810272                                                                               | 215.9388174 | 296.4353707 |             |
| 325.2941074     | 366.4188768                                                                               | 659.9188696 | 257.5850718 |             |
| 450.5439513     | -0.809616348                                                                              | 0.005772688 | 0.047716393 | F8A1        |
| X               | 154886349                                                                                 | 154888061   | + 1713      |             |
| protein_coding  | coagulation factor VIII associated 1 [Source:HGNC Symbol;Acc:HGNC:3547]                   |             |             |             |
|                 | -                                                                                         | 287         | 244         | 255         |
|                 |                                                                                           |             |             | 314         |
| 765             | 8.204520742                                                                               | 6.749302668 | 9.261677706 | 321         |
| 10.18554633     | 11.51847621                                                                               | 20.76515084 |             |             |
| ENSG00000119720 | 308.4653284                                                                               | 353.9980612 | 282.4854709 |             |
| 437.1787048     | 547.9160775                                                                               | 461.5118892 | 314.9829535 |             |
| 482.2022239     | -0.612520677                                                                              | 0.005781887 | 0.047753336 | NRDE2       |

|                 |                                                                                                 |             |             |              |             |      |      |
|-----------------|-------------------------------------------------------------------------------------------------|-------------|-------------|--------------|-------------|------|------|
| 14              | 90267856                                                                                        | 90332137    | -           | 17565        |             |      |      |
| protein_coding  | "NRDE-2, necessary for RNA interference, domain containing [Source:HGNC Symbol;Acc:HGNC:20186]" |             |             |              | -           | 340  | 400  |
| 243             | 422                                                                                             | 480         | 535         | 0.947893285  | 1.079041823 |      |      |
|                 | 0.860726088                                                                                     | 1.33498486  | 1.679733731 | 1.416239314  |             |      |      |
| ENSG00000180611 | 107.962865                                                                                      | 143.3692148 | 152.2864061 |              |             |      |      |
| 174.0427071     | 288.7974325                                                                                     | 282.0829678 | 134.5394953 |              |             |      |      |
| 248.3077025     | -0.885780831                                                                                    | 0.005782557 | 0.047753336 |              | MB21D2      |      |      |
| 3               | 192796815                                                                                       | 192918161   | -           | 3368         |             |      |      |
| protein_coding  | Mab-21 domain containing 2 [Source:HGNC Symbol;Acc:HGNC:30438]                                  |             |             |              | -           | 119  | 162  |
|                 |                                                                                                 |             | 131         | 168          | 253         |      |      |
| 327             | 1.730228901                                                                                     | 2.279131442 | 2.419948142 |              |             |      |      |
| 2.771719279     | 4.617381925                                                                                     | 4.514469133 |             |              |             |      |      |
| ENSG00000161204 | 1168.539244                                                                                     | 1465.551974 | 1103.204576 |              |             |      |      |
| 1607.823104     | 1602.654527                                                                                     | 1953.014799 | 1245.765264 |              |             |      |      |
| 1721.164143     | -0.466154444                                                                                    | 0.005822114 | 0.04805757  |              | ABCF3       |      |      |
| 3               | 184186023                                                                                       | 184194012   | +           | 5207         |             |      |      |
| protein_coding  | ATP binding cassette subfamily F member 3 [Source:HGNC Symbol;Acc:HGNC:72]                      |             |             |              | -           | 1288 | 1656 |
|                 |                                                                                                 |             | 949         | 1552         | 1404        |      |      |
| 2264            | 12.11314648                                                                                     | 15.06951224 | 11.33928005 |              |             |      |      |
| 16.56212976     | 16.57398305                                                                                     | 20.21714672 |             |              |             |      |      |
| ENSG00000250906 | 0                                                                                               | 0           | 0           | 3.107905485  | 12.55641011 |      |      |
|                 | 14.66486377                                                                                     | 0           | 10.10972645 | -5.814609078 |             |      |      |
| 0.005827288     | 0.048077844                                                                                     | AC131953.1  | 4           | 40812779     |             |      |      |
| 40826151        | +                                                                                               | 477         | antisense   | novel        |             |      |      |
| transcript      | -                                                                                               | 0           | 0           | 3            | 11          | 17   |      |
|                 | 0                                                                                               | 0           | 0.349474039 | 1.417495426  |             |      |      |
| 1.657149005     |                                                                                                 |             |             |              |             |      |      |
| ENSG00000022840 | 2053.108936                                                                                     | 2113.368426 | 2413.332665 |              |             |      |      |
| 2566.093962     | 3102.574789                                                                                     | 2981.28054  | 2193.270009 |              |             |      |      |
| 2883.31643      | -0.395011051                                                                                    | 0.005868288 | 0.048393543 |              | RNF10       |      |      |
| 12              | 120533480                                                                                       | 120577594   | +           | 5911         |             |      |      |
| protein_coding  | ring finger protein 10 [Source:HGNC Symbol;Acc:HGNC:10055]                                      |             |             |              | -           | 2263 | 2388 |
|                 |                                                                                                 |             | 2076        | 2477         | 2718        |      |      |
| 3456            | 18.74788488                                                                                     | 19.14255061 | 21.85109657 |              |             |      |      |
| 23.2850455      | 28.26414505                                                                                     | 27.18590485 |             |              |             |      |      |
| ENSG00000131873 | 1720.147831                                                                                     | 1564.671431 | 2041.335337 |              |             |      |      |
| 1378.874067     | 1362.941243                                                                                     | 1173.189102 | 1775.384866 |              |             |      |      |
| 1305.00147      | 0.443922029                                                                                     | 0.005874986 | 0.048412247 |              | CHSY1       |      |      |
| 15              | 101175723                                                                                       | 101251932   | -           | 5555         |             |      |      |
| protein_coding  | chondroitin sulfate synthase 1 [Source:HGNC Symbol;Acc:HGNC:17198]                              |             |             |              | -           | 1896 | 1768 |
|                 |                                                                                                 |             | 1756        | 1331         | 1194        |      |      |
| 1360            | 16.71409835                                                                                     | 15.08080895 | 19.66741559 |              |             |      |      |
| 13.31392284     | 13.21197136                                                                                     | 11.38376346 |             |              |             |      |      |
| ENSG00000135045 | 913.6017227                                                                                     | 892.0751143 | 1074.142285 |              |             |      |      |
| 800.8036466     | 607.2736526                                                                                     | 596.0835803 | 959.9397072 |              |             |      |      |
| 668.0536265     | 0.52261427                                                                                      | 0.005876392 | 0.048412247 |              |             |      |      |
| C9orf40         | 9                                                                                               | 74946581    | 74952886    | -            | 2327        |      |      |
| protein_coding  | chromosome 9 open reading frame 40 [Source:HGNC Symbol;Acc:HGNC:23433]                          |             |             |              | -           | 1007 | 1008 |
|                 |                                                                                                 |             | 924         | 773          | 532         |      |      |

|                                    |                                                                                                    |                     |                         |             |
|------------------------------------|----------------------------------------------------------------------------------------------------|---------------------|-------------------------|-------------|
| 691                                | 21.19150353                                                                                        | 20.52535086         | 24.70486213             |             |
| 18.4584468                         | 14.05279171                                                                                        | 13.80742466         |                         |             |
| ENSG00000158747                    | 437.2949656                                                                                        | 819.5055118         | 1526.351536             |             |
| 438.2146733                        | 562.7554713                                                                                        | 519.3087053         | 927.7173379             |             |
| 506.7596166                        | 0.871268415                                                                                        | 0.005878914         | 0.048412247             | NBL1        |
| 1                                  | 19596979                                                                                           | 19658456            | + 3596                  |             |
| protein_coding                     | "NBL1, DAN family BMP antagonist [Source:HGNC Symbol;Acc:HGNC:7650]"                               |                     |                         | -           |
|                                    |                                                                                                    | 482 926             | 1313 423                | 493         |
| 602                                | 6.563810567                                                                                        | 12.201627           | 22.71704768             |             |
| 6.536311302                        | 8.427031095                                                                                        | 7.7840896           |                         |             |
| ENSG00000106615                    | 1620.350225                                                                                        | 1715.120607         | 1501.939212             |             |
| 1323.967736                        | 1038.757564                                                                                        | 1215.458415         | 1612.470015             |             |
| 1192.727905                        | 0.434946833                                                                                        | 0.005881504         | 0.048412247             | RHEB        |
| 7                                  | 151466012                                                                                          | 151520120           | - 3535                  |             |
| protein_coding                     | "Ras homolog, mTORC1 binding [Source:HGNC Symbol;Acc:HGNC:10011]"                                  |                     |                         | -           |
|                                    |                                                                                                    | 1786 1938           | 1292 1278               | 910         |
| 1409                               | 24.74119772                                                                                        | 25.97710773         | 22.73944926             |             |
| 20.08877615                        | 15.82338279                                                                                        | 18.53329306         |                         |             |
| ENSG00000232480                    | 3.629003864                                                                                        | 10.61994184         | 16.2748831              | 0           |
| 0                                  | 0                                                                                                  | 10.1746096          | 0                       | 5.776756054 |
| 0.00589095                         | 0.048466354                                                                                        | TGFB2-AS1           | 1                       | 218344196   |
| 218345678                          | -                                                                                                  | 557 antisense       | TGFB2                   |             |
| antisense RNA 1 (head to head)     | [Source:HGNC Symbol;Acc:HGNC:50628]                                                                |                     |                         |             |
| -                                  | 4 12                                                                                               | 14 0                | 0 0                     |             |
| 0.351668509                        | 1.020827807                                                                                        | 1.563794521         | 0 0                     | 0           |
| ENSG00000051108                    | 1754.623368                                                                                        | 1993.89408          | 1641.43821              |             |
| 3268.480601                        | 2032.996946                                                                                        | 2331.713339         | 1796.651886             |             |
| 2544.396962                        | -0.501793095                                                                                       | 0.005898286         | 0.048466354             |             |
| HERPUD1 16                         | 56932048                                                                                           | 56944863            | + 5155                  |             |
| protein_coding                     | homocysteine inducible ER protein with ubiquitin like domain 1 [Source:HGNC Symbol;Acc:HGNC:13744] |                     |                         | -           |
|                                    |                                                                                                    | 1412 3155 1781 2703 | 18.37200199 20.70899212 | 2253        |
|                                    | 17.04169835                                                                                        | 34.00812886         | 21.23648377             | 24.38082483 |
| ENSG00000251669                    | 75.30183018                                                                                        | 116.8193602         | 72.07448229             |             |
| 203.049825                         | 176.9312334                                                                                        | 147.5112767         | 88.06522423             |             |
| 175.8307784                        | -0.993678912                                                                                       | 0.005898944         | 0.048466354             |             |
| FAM86EP 4                          | 3941760 3955419                                                                                    | - 3476              |                         |             |
| transcribed_unprocessed_pseudogene | "family with sequence similarity 86 member E, pseudogene [Source:HGNC Symbol;Acc:HGNC:28017]"      |                     |                         | -           |
|                                    |                                                                                                    | 83 132              | 62 196                  | 155         |
| 171                                | 1.16930285                                                                                         | 1.799370534         | 1.109733684             |             |
| 3.133201655                        | 2.740938497                                                                                        | 2.28742762          |                         |             |
| ENSG00000113387                    | 3227.091686                                                                                        | 3196.602493         | 3408.425517             |             |
| 2756.712165                        | 2513.565006                                                                                        | 2401.587102         | 3277.373232             |             |
| 2557.288091                        | 0.357930734                                                                                        | 0.005899037         | 0.048466354             | SUB1        |
| 5                                  | 32531633                                                                                           | 32604079            | + 9324                  |             |
| protein_coding                     | "SUB1 homolog, transcriptional regulator [Source:HGNC Symbol;Acc:HGNC:19985]"                      |                     |                         | PC4         |
|                                    |                                                                                                    | 3557 3612           | 2932 2661               | 2202        |
| 2784                               | 18.68143718                                                                                        | 18.35574085         | 19.56449074             |             |
| 15.85822785                        | 14.51651643                                                                                        | 13.88346866         |                         |             |

|                                     |                                                  |             |                |                     |       |
|-------------------------------------|--------------------------------------------------|-------------|----------------|---------------------|-------|
| ENSG00000104763                     | 1222.974302                                      | 1140.758752 | 1275.25334     |                     |       |
| 1027.680747                         | 838.9964937                                      | 531.3856519 | 1212.995465    |                     |       |
| 799.3542975                         | 0.602601438                                      | 0.005923708 | 0.048646456    | ASAH1               |       |
| 8                                   | 18055992                                         | 18084998    | -              | 15378               |       |
| protein_coding                      | N-acylsphingosine amidohydrolase 1 [Source:HGNC  |             |                |                     |       |
| Symbol;Acc:HGNC:735]                | -                                                | 1348        | 1289           | 1097                | 992   |
| 616                                 | 4.292583177                                      | 3.971728028 | 4.438268966    | 735                 |       |
| 3.584460998                         | 2.937885344                                      | 1.86256687  |                |                     |       |
| ENSG00000130702                     | 137.9021468                                      | 129.2092924 | 642.8578824    |                     |       |
| 21.75533839                         | 81.0459198                                       | 8.626390453 | 303.3231072    |                     |       |
| 37.14254955                         | 3.032925473                                      | 0.005952231 | 0.048858012    | LAMA5               |       |
| 20                                  | 62307955                                         | 62367312    | -              | 14291               |       |
| protein_coding                      | laminin subunit alpha 5 [Source:HGNC             |             |                |                     |       |
| Symbol;Acc:HGNC:6485]               | -                                                | 152         | 146            | 553                 | 21    |
| 10                                  | 0.520846383                                      | 0.484079484 | 2.407516979    | 71                  |       |
| 0.081652356                         | 0.305381757                                      | 0.032536318 |                |                     |       |
| ENSG00000067369                     | 1342.73143                                       | 1092.969014 | 1188.066466    |                     |       |
| 1004.88944                          | 716.8568681                                      | 841.9357082 | 1207.922303    |                     |       |
| 854.5606721                         | 0.498970821                                      | 0.005956744 | 0.048862776    |                     |       |
| TP53BP1                             | 15                                               | 43403061    | 43510728       | -                   | 12991 |
| protein_coding                      | tumor protein p53 binding protein 1 [Source:HGNC |             |                |                     |       |
| Symbol;Acc:HGNC:11999]              | -                                                | 1480        | 1235           | 1022                | 970   |
| 976                                 | 5.578890228                                      | 4.504543816 | 4.894576939    | 628                 |       |
| 4.148978603                         | 2.971422593                                      | 3.493319057 |                |                     |       |
| ENSG00000157833                     | 156.9544171                                      | 203.5488852 | 106.9492318    |                     |       |
| 293.1790841                         | 228.2983656                                      | 332.1160324 | 155.8175114    |                     |       |
| 284.5311607                         | -0.866290488                                     | 0.005958336 | 0.048862776    | GAREM2              |       |
| 2                                   | 26173091                                         | 26189663    | +              | 5939                |       |
| protein_coding                      | GRB2 associated regulator of MAPK1 subtype 2     |             |                |                     |       |
| [Source:HGNC Symbol;Acc:HGNC:27172] | -                                                |             | 173            | 230                 | 92    |
| 283                                 | 200                                              | 385         | 1.426466121    | 1.835020632         |       |
| 0.963787632                         | 2.647799854                                      | 2.069969901 | 3.01424412     |                     |       |
| ENSG00000119725                     | 16.33051739                                      | 12.38993214 | 2.3249833      | 0                   |       |
| 0                                   | 0                                                | 10.34847761 | 0              | 5.808550491         |       |
| 0.005975158                         | 0.048978018                                      | ZNF410      | 14             | 73886617            |       |
| 73932511                            | +                                                | 6486        | protein_coding | zinc finger protein |       |
| 410                                 | [Source:HGNC Symbol;Acc:HGNC:20144]              | zf-C2H2     | 18             | 14                  | 2     |
| 0                                   | 0                                                | 0           | 0.135901498    | 0.102276894         |       |
| 0.019184916                         | 0                                                | 0           | 0              |                     |       |
| ENSG00000279412                     | 35.38278767                                      | 18.58489822 | 11.6249165     |                     |       |
| 59.05020421                         | 49.08414861                                      | 108.6925197 | 21.8642008     |                     |       |
| 72.27562418                         | -1.719584003                                     | 0.005984759 | 0.049033994    |                     |       |
| AC020763.3                          | 16                                               | 70713987    | 70716890       | +                   | 2904  |
| TEC                                 | novel transcript                                 |             |                |                     |       |
| 57                                  | 43                                               | 126         | 0.657652808    | 0.342648728         | 10    |
| 0.214244773                         | 1.090662264                                      | 0.910163057 | 2.017460086    |                     |       |
| ENSG00000100629                     | 297.5783168                                      | 209.7438513 | 312.7102538    |                     |       |
| 203.049825                          | 47.94265678                                      | 119.9068273 | 273.3441407    |                     |       |
| 123.633103                          | 1.142254024                                      | 0.006016198 | 0.049252768    | CEP128              |       |
| 14                                  | 80476983                                         | 80959517    | -              | 9400                |       |



|                            |                                            |                        |             |             |             |                |        |
|----------------------------|--------------------------------------------|------------------------|-------------|-------------|-------------|----------------|--------|
| protein_coding             | centrosomal protein 128                    | [Source:HGNC           |             |             |             |                |        |
| Symbol;Acc:HGNC:20359]     | -                                          | 328                    | 237         | 269         | 196         | 42             |        |
| 139                        | 1.708734837                                | 1.194667181            | 1.780456113 |             |             |                |        |
| 1.158617974                | 0.274643166                                | 0.687571655            |             |             |             |                |        |
| ENSG00000145217            | 177.8211893                                | 277.8884781            | 145.3114562 |             |             |                |        |
| 275.5676196                | 360.7114177                                | 440.8085521            | 200.3403745 |             |             |                |        |
| 359.0291965                | -0.839698436                               | 0.006019471            | 0.049252768 |             |             |                |        |
| SLC26A1                    | 4                                          | 979073                 | 993440      | -           | 4293        | protein_coding | solute |
| carrier family 26 member 1 | [Source:HGNC                               | Symbol;Acc:HGNC:10993] | -           |             |             |                |        |
| 196                        | 314                                        | 125                    | 266         | 316         | 511         | 2.235753228    |        |
| 3.465733788                | 1.81157355                                 | 3.442966458            | 4.524530856 |             |             |                |        |
| 5.534661057                |                                            |                        |             |             |             |                |        |
| ENSG00000115165            | 9.07250966                                 | 7.079961225            | 12.78740815 |             |             |                |        |
| 58.01423571                | 22.82983656                                | 43.99459131            | 9.646626345 |             |             |                |        |
| 41.61288786                | -2.120015043                               | 0.006019814            | 0.049252768 |             |             | CYTIP          |        |
| 2                          | 157414619                                  | 157488961              | -           | 3428        |             |                |        |
| protein_coding             | cytohesin 1 interacting protein            | [Source:HGNC           |             |             |             |                |        |
| Symbol;Acc:HGNC:9506]      | -                                          | 10                     | 8           | 11          | 56          | 20             |        |
| 51                         | 0.142852508                                | 0.110579753            | 0.199645129 |             |             |                |        |
| 0.907735369                | 0.358621682                                | 0.691767861            |             |             |             |                |        |
| ENSG00000182173            | 626.0031665                                | 783.2207105            | 626.5829993 |             |             |                |        |
| 845.3502918                | 1010.220268                                | 1031.716298            | 678.6022921 |             |             |                |        |
| 962.4289526                | -0.503602275                               | 0.00602601             | 0.049280674 |             |             | TSEN54         |        |
| 17                         | 75516060                                   | 75524739               | +           | 3440        |             |                |        |
| protein_coding             | tRNA splicing endonuclease subunit 54      | [Source:HGNC           |             |             |             |                |        |
| Symbol;Acc:HGNC:27561]     | -                                          | 690                    | 885         | 539         | 816         | 885            |        |
| 1196                       | 9.822438803                                | 12.19021229            | 9.74848593  |             |             |                |        |
| 13.18086038                | 15.8136524                                 | 16.16604395            |             |             |             |                |        |
| ENSG00000144655            | 485.3792668                                | 565.5119028            | 685.8700734 |             |             |                |        |
| 723.1060094                | 1019.352203                                | 832.4466787            | 578.9204144 |             |             |                |        |
| 858.3016302                | -0.568928002                               | 0.00604413             | 0.049406017 |             |             | CSRNP1         |        |
| 3                          | 39141855                                   | 39154562               | -           | 3214        |             |                |        |
| protein_coding             | cysteine and serine rich nuclear protein 1 | [Source:HGNC           |             |             |             |                |        |
| Symbol;Acc:HGNC:14300]     | -                                          |                        | 535         | 639         | 590         |                |        |
| 698                        | 893                                        | 965                    | 8.151482362 | 9.420662094 |             |                |        |
| 11.42123285                | 12.0676191                                 | 17.07862673            | 13.96086923 |             |             |                |        |
| ENSG00000161791            | 2219.135863                                | 1840.789918            | 2302.895958 |             |             |                |        |
| 1583.995829                | 1525.033082                                | 1682.146138            | 2120.94058  |             |             |                |        |
| 1597.05835                 | 0.408670522                                | 0.006050412            | 0.049415827 |             |             | FMNL3          |        |
| 12                         | 49636499                                   | 49708165               | -           | 13424       |             |                |        |
| protein_coding             | formin like 3                              | [Source:HGNC           |             |             |             |                |        |
| Symbol;Acc:HGNC:23698]     | -                                          | 2446                   | 2080        | 1981        | 1529        | 1336           | 1950   |
| 8.922841793                | 7.341889305                                | 9.181409941            | 6.329036286 |             |             |                |        |
| 6.117470375                | 6.754351939                                |                        |             |             |             |                |        |
| ENSG00000222032            | 194.1517067                                | 140.7142293            | 192.9736139 |             |             |                |        |
| 33.15099184                | 73.055477                                  | 119.9068273            | 175.9465166 |             |             |                |        |
| 75.37109871                | 1.217823091                                | 0.006050918            | 0.049415827 |             |             |                |        |
| AC112721.2                 | 2                                          | 237428920              | 237434822   | -           | 541         |                |        |
| lincRNA                    | novel protein (LOC728009)                  |                        |             | -           | 214         | 159            |        |
| 166                        | 32                                         | 64                     | 139         | 19.3706945  | 13.92599709 |                |        |

|                        |                                            |              |             |             |             |
|------------------------|--------------------------------------------|--------------|-------------|-------------|-------------|
|                        | 19.0905161                                 | 3.286735509  | 7.271601475 | 11.94671637 |             |
| ENSG00000246250        | 1.814501932                                | 4.424975766  | 0           | 27.97114936 |             |
|                        | 30.82027936                                | 9.489029498  | 2.079825899 | 22.76015274 |             |
|                        | -3.402954606                               | 0.006058473  | 0.049454701 | AC087521.2  |             |
|                        | 11                                         | 43829709     | 43880726    | -           | 3296        |
| antisense              | novel transcript                           |              | -           | 2           | 5           |
|                        | 27                                         | 27           | 11          | 0.029714709 | 0.071880194 |
|                        | 0.455185695                                | 0.503528343  | 0.155180269 |             | 0           |
| ENSG00000100092        | 98.89035529                                | 114.1643748  | 116.249165  |             |             |
| 14.50355893            | 23.97132839                                | 72.4616798   | 109.767965  |             |             |
| 36.97885571            | 1.558486471                                | 0.006070279  | 0.049528216 |             | SH3BP1      |
|                        | 22                                         | 37634654     | 37656119    | +           | 4892        |
| protein_coding         | SH3 domain binding protein 1               | [Source:HGNC |             |             |             |
| Symbol;Acc:HGNC:10824] | -                                          | 109          | 129         | 100         | 14          |
|                        | 84                                         | 1.091110495  | 1.249481133 | 1.27180462  | 21          |
|                        | 0.159020689                                | 0.263864039  | 0.798406117 |             |             |
| ENSG00000179869        | 88.91059467                                | 161.954113   | 62.77454909 |             |             |
| 173.0067386            | 293.3633998                                | 198.4069804  | 104.5464189 |             |             |
| 221.592373             | -1.07815645                                | 0.006096026  | 0.049696178 |             | ABCA13      |
|                        | 7                                          | 48171458     | 48647496    | +           | 19074       |
| protein_coding         | ATP binding cassette subfamily A member 13 | [Source:HGNC |             |             |             |
| Symbol;Acc:HGNC:14638] | -                                          |              | 98          | 183         | 54          |
|                        | 167                                        | 257          | 230         | 0.251601358 | 0.454606616 |
|                        | 0.176140339                                | 0.48650436   | 0.828206635 | 0.560682596 |             |
| ENSG00000182220        | 1297.368881                                | 1267.313059  | 1684.450401 |             |             |
| 1066.011581            | 1092.40768                                 | 876.44127    | 1416.377447 |             |             |
| 1011.620177            | 0.485435115                                | 0.006096484  | 0.049696178 |             |             |
| ATP6AP2 X              | 40579372                                   | 40606848     | +           | 9560        |             |
| protein_coding         | ATPase H+ transporting accessory protein 2 | [Source:HGNC |             |             |             |
| Symbol;Acc:HGNC:18305] | -                                          |              | 1430        | 1432        | 1449        |
|                        | 1029                                       | 957          | 1016        | 7.324986502 | 7.097600758 |
|                        | 9.430122618                                | 5.980941108  | 6.153205304 | 4.941591415 |             |
| ENSG00000196821        | 2995.74269                                 | 3715.209653  | 3494.4499   |             |             |
| 3601.026488            | 4807.96358                                 | 5704.632006  | 3401.800747 |             |             |
| 4704.540692            | -0.4679569                                 | 0.006107271  | 0.049761176 |             |             |
| C6orf106               | 6                                          | 34587288     | 34696859    | -           | 4551        |
| protein_coding         | chromosome 6 open reading frame 106        | [Source:HGNC |             |             |             |
| Symbol;Acc:HGNC:21215] | -                                          |              | 3302        | 4198        | 3006        |
|                        | 3476                                       | 4212         | 6613        | 35.53030348 | 43.70811123 |
|                        | 41.09500024                                | 42.44093821  | 56.88907695 | 67.56514379 |             |
| ENSG00000088756        | 158.768919                                 | 146.9091954  | 304.5728123 |             |             |
| 119.1363769            | 105.0172482                                | 62.97265031  | 203.4169756 |             |             |
| 95.70875847            | 1.087910273                                | 0.006116863  | 0.04981253  |             |             |
| ARHGAP28               | 18                                         | 6729718      | 6915716     | +           | 11910       |
| protein_coding         | Rho GTPase activating protein 28           | [Source:HGNC |             |             |             |
| Symbol;Acc:HGNC:25509] | -                                          | 175          | 166         | 262         | 115         |
|                        | 73                                         | 0.719540048  | 0.660423879 | 1.368662526 | 92          |
|                        | 0.53653508                                 | 0.474813902  | 0.2849982   |             |             |
| ENSG00000076003        | 3049.270497                                | 3109.872968  | 3444.462759 |             |             |
| 2801.25881             | 2377.727478                                | 1872.789367  | 3201.202074 |             |             |

|                                    |                                                         |              |             |       |
|------------------------------------|---------------------------------------------------------|--------------|-------------|-------|
| 2350.591885                        | 0.445822497                                             | 0.006119206  | 0.04981253  | MCM6  |
| 2                                  | 135839626                                               | 135876426    | - 4118      |       |
| protein_coding                     | minichromosome maintenance complex component 6          |              |             |       |
| [Source:HGNC Symbol;Acc:HGNC:6949] | -                                                       | 3361         | 3514        | 2963  |
| 2704                               | 2083 2171                                               | 39.96785616  | 40.43354836 |       |
| 44.76639844                        | 36.4865154                                              | 31.09211661  | 24.51345347 |       |
| ENSG00000169047                    | 1828.110696                                             | 1862.914797  | 2025.060454 |       |
| 1273.20528                         | 1437.138212                                             | 1587.255843  | 1905.361983 |       |
| 1432.533112                        | 0.410857834                                             | 0.006152753  | 0.050047059 | IRS1  |
| 2                                  | 226731317                                               | 226799759    | - 9953      |       |
| protein_coding                     | insulin receptor substrate 1 [Source:HGNC               |              |             |       |
| Symbol;Acc:HGNC:6125]              | -                                                       | 2015 2105    | 1742 1229   | 1259  |
| 1840                               | 9.914018614                                             | 10.02131093  | 10.88932584 |       |
| 6.861355515                        | 7.775334581                                             | 8.59596893   |             |       |
| ENSG00000237523                    | 71.67282631                                             | 38.93978674  | 40.68720775 |       |
| 19.6834014                         | 5.707459141                                             | 0 50.4332736 | 8.463620181 |       |
| 2.587646849                        | 0.006153675                                             | 0.050047059  | LINC00857   |       |
| 10                                 | 80207710                                                | 80219657     | + 2171      |       |
| lincRNA                            | long intergenic non-protein coding RNA 857 [Source:HGNC |              |             |       |
| Symbol;Acc:HGNC:45114]             | -                                                       | 79 44        | 35 19       | 5     |
| 0                                  | 1.781951795                                             | 0.960327342  | 1.003032644 |       |
| 0.486301737                        | 0.141565537                                             | 0            |             |       |
| ENSG00000205413                    | 394.6541702                                             | 269.9235217  | 377.8097862 |       |
| 221.6972579                        | 182.6386925                                             | 226.0114299  | 347.4624927 |       |
| 210.1157934                        | 0.723712767                                             | 0.006176057  | 0.050206007 | SAMD9 |
| 7                                  | 93099513                                                | 93118023     | - 6855      |       |
| protein_coding                     | sterile alpha motif domain containing 9 [Source:HGNC    |              |             |       |
| Symbol;Acc:HGNC:1348]              | -                                                       | 435 305      | 325 214     | 160   |
| 262                                | 3.107495307                                             | 2.108234039  | 2.949733283 |       |
| 1.734675952                        | 1.434695988                                             | 1.777153128  |             |       |
| ENSG00000106683                    | 1334.566171                                             | 1168.193602  | 1608.888443 |       |
| 855.7099768                        | 1132.359894                                             | 918.7105832  | 1370.549406 |       |
| 968.9268179                        | 0.50014341                                              | 0.006181677  | 0.050228612 | LIMK1 |
| 7                                  | 74082933                                                | 74122525     | + 6902      |       |
| protein_coding                     | LIM domain kinase 1 [Source:HGNC Symbol;Acc:HGNC:6613]  |              |             |       |
| -                                  | 1471 1320                                               | 1384 826     | 992 1065    |       |
| 10.43677693                        | 9.062028362                                             | 12.47578787  | 6.649930953 |       |
| 8.834542766                        | 7.174731795                                             |              |             |       |
| ENSG00000110063                    | 505.3387881                                             | 562.8569174  | 541.7211088 |       |
| 395.7399651                        | 325.325171                                              | 370.0721504  | 536.6389381 |       |
| 363.7124288                        | 0.560508915                                             | 0.006187176  | 0.050243854 | DCPS  |
| 11                                 | 126303752                                               | 126345754    | + 3936      |       |
| protein_coding                     | "decapping enzyme, scavenger [Source:HGNC               |              |             |       |
| Symbol;Acc:HGNC:29812]"            | -                                                       | 557 636      | 466 382     | 285   |
| 429                                | 6.929929062                                             | 7.656467911  | 7.366101071 |       |
| 5.392874538                        | 4.450790275                                             | 5.067960491  |             |       |
| ENSG00000276805                    | 78.93083404                                             | 64.60464618  | 61.61205744 |       |
| 113.9565344                        | 162.0918396                                             | 145.7859987  | 68.38251255 |       |
| 140.6114576                        | -1.038140291                                            | 0.006189234  | 0.050243854 |       |
| AL133216.2                         | 10 38403189                                             | 38452153     | + 7213      |       |

|                                    |                                                |                                    |              |             |        |
|------------------------------------|------------------------------------------------|------------------------------------|--------------|-------------|--------|
| transcribed_unprocessed_pseudogene | general transcription                          |                                    |              |             |        |
| factor III (GTF2I) pseudogene      | -                                              | 87                                 | 73           | 53          | 110    |
| 142                                | 169                                            | 0.590652442                        | 0.479549419  | 0.457158484 |        |
| 0.847400657                        | 1.210095852                                    | 1.089436171                        |              |             |        |
| ENSG00000174365                    | 162.3979229                                    | 204.4338804                        | 141.8239813  |             |        |
| 297.322958                         | 234.0058248                                    | 348.5061743                        | 169.5519282  |             |        |
| 293.278319                         | -0.789919494                                   | 0.006210286                        | 0.050391625  |             | SNHG11 |
| 20                                 | 38446578                                       | 38450921                           | +            | 2813        |        |
| processed_transcript               | small nucleolar RNA                            | host gene 11                       | [Source:HGNC |             |        |
| Symbol;Acc:HGNC:25046]             | -                                              | 179                                | 231          | 122         | 287    |
| 404                                | 3.116104277                                    | 3.891066817                        | 2.698341701  |             | 205    |
| 5.669231718                        | 4.479520094                                    | 6.677942128                        |              |             |        |
| ENSG00000185386                    | 171.4704326                                    | 215.9388174                        | 203.4360387  |             |        |
| 258.9921237                        | 331.0326302                                    | 397.6765999                        | 196.9484296  |             |        |
| 329.2337846                        | -0.742571607                                   | 0.006239431                        | 0.050604904  |             | MAPK11 |
| 22                                 | 50263713                                       | 50270767                           | -            | 2688        |        |
| protein_coding                     | mitogen-activated protein kinase 11            | [Source:HGNC                       |              |             |        |
| Symbol;Acc:HGNC:6873]              | -                                              | 189                                | 244          | 175         | 250    |
| 461                                | 3.443191863                                    | 4.30117391                         | 4.050565235  |             | 290    |
| 5.168003367                        | 6.631565961                                    | 7.974485618                        |              |             |        |
| ENSG00000057657                    | 88.91059467                                    | 68.14462679                        | 198.7860721  |             |        |
| 22.79130689                        | 70.77249335                                    | 29.32972754                        | 118.6137645  |             |        |
| 40.96450926                        | 1.53674389                                     | 0.006253122                        | 0.050692704  |             | PRDM1  |
| 6                                  | 106086320                                      | 106109939                          | +            | 6392        |        |
| protein_coding                     | PR/SET domain 1                                | [Source:HGNC Symbol;Acc:HGNC:9346] |              |             |        |
| zf-C2H2                            | 98                                             | 77                                 | 171          | 22          | 62     |
| 0.750789159                        | 0.570795315                                    | 1.664432513                        | 0.191248465  |             |        |
| 0.596214156                        | 0.247327934                                    |                                    |              |             |        |
| ENSG00000232479                    | 3.629003864                                    | 10.61994184                        | 3.48747495   |             |        |
| 24.86324388                        | 47.94265678                                    | 26.7418104                         | 5.912140217  |             |        |
| 33.18257035                        | -2.471723023                                   | 0.006260849                        | 0.05073209   |             |        |
| AC010900.1                         | 2                                              | 202924609                          | 202925904    | +           | 1296   |
| processed_pseudogene               | keratin 8 (KRT8) pseudogene                    |                                    |              |             |        |
| 4                                  | 12                                             | 3                                  | 24           | 42          | 31     |
| 0.438735408                        | 0.144020097                                    | 1.029006893                        | 1.992010618  |             |        |
| 1.112212343                        |                                                |                                    |              |             |        |
| ENSG00000106636                    | 4194.221216                                    | 5032.967436                        | 4139.632765  |             |        |
| 5049.310444                        | 5948.313917                                    | 6633.694258                        | 4455.607139  |             |        |
| 5877.106206                        | -0.399449465                                   | 0.006270174                        | 0.050784392  |             | YKT6   |
| 7                                  | 44200968                                       | 44214294                           | +            | 3707        |        |
| protein_coding                     | YKT6 v-SNARE homolog                           | [Source:HGNC                       |              |             |        |
| Symbol;Acc:HGNC:16959]             | -                                              | 4623                               | 5687         | 3561        | 4874   |
| 7690                               | 61.07029122                                    | 72.69207785                        | 59.76628126  |             | 5211   |
| 73.05921179                        | 86.40638728                                    | 96.45722688                        |              |             |        |
| ENSG00000104738                    | 8725.939791                                    | 8536.663247                        | 8253.690714  |             |        |
| 7976.957411                        | 5641.252615                                    | 5341.460968                        | 8505.431251  |             |        |
| 6319.890331                        | 0.42857575                                     | 0.006276528                        | 0.050812584  |             | MCM4   |
| 8                                  | 47960185                                       | 47978160                           | +            | 6973        |        |
| protein_coding                     | minichromosome maintenance complex component 4 | [Source:HGNC Symbol;Acc:HGNC:6947] |              |             |        |
|                                    | -                                              |                                    | 9618         | 9646        | 7100   |

|                                     |                          |                                     |                                     |                |                  |
|-------------------------------------|--------------------------|-------------------------------------|-------------------------------------|----------------|------------------|
| 7700                                | 4942                     | 6192                                | 67.54509099                         | 65.5471832     |                  |
| 63.34984113                         | 61.35968248              |                                     | 43.5642695                          | 41.28975449    |                  |
| ENSG00000169155                     | 322.0740929              |                                     | 409.7527559                         | 305.7353039    |                  |
| 568.7467037                         | 571.8874059              |                                     | 449.4349426                         | 345.8540509    |                  |
| 530.0230174                         | -0.613746696             |                                     | 0.006288384                         | 0.050885283    | ZBTB43           |
| 9                                   | 126805006                |                                     | 126838210                           | + 7052         |                  |
| protein_coding                      | zinc finger and          | BTB domain containing 43            | [Source:HGNC                        |                |                  |
| Symbol;Acc:HGNC:17908]              | ZBTB                     | 355                                 | 463                                 | 263            | 549 501          |
| 521                                 | 2.465157847              |                                     | 3.110965022                         | 2.320332865    |                  |
| 4.325856259                         | 4.36689533               |                                     | 3.435234888                         |                |                  |
| ENSG00000087365                     | 10729.14992              |                                     | 10904.02528                         | 11035.53323    |                  |
| 12933.03069                         | 13342.89798              |                                     | 14071.36811                         | 10889.56948    |                  |
| 13449.09893                         | -0.304614754             |                                     | 0.006295586                         | 0.050920264    | SF3B2            |
| 11                                  | 66050729                 |                                     | 66069308                            | + 9795         |                  |
| protein_coding                      | splicing factor 3b       | subunit 2                           | [Source:HGNC                        |                |                  |
| Symbol;Acc:HGNC:10769]              | -                        | 11826                               | 12321                               | 9493           | 12484 11689      |
| 16312                               | 59.12376987              |                                     | 59.60297782                         | 60.29841371    |                  |
| 70.82088725                         | 73.35340505              |                                     | 77.43437379                         |                |                  |
| ENSG00000110619                     | 1802.707669              |                                     | 2131.953324                         | 2292.433534    |                  |
| 2465.605018                         | 3018.104394              |                                     | 2800.126341                         | 2075.698176    |                  |
| 2761.278584                         | -0.412027542             |                                     | 0.006302071                         | 0.050949421    | CARS             |
| 11                                  | 3000922                  | 3057613                             | - 10037                             | protein_coding |                  |
| cysteinyI-tRNA                      | synthetase               | [Source:HGNC Symbol;Acc:HGNC:1493]  |                                     |                | -                |
| 1987                                | 2409                     | 1972                                | 2380                                | 2644           | 3246 9.694437755 |
| 11.37258828                         | 12.22390126              |                                     | 13.17604522                         | 16.19216374    |                  |
| 15.03749893                         |                          |                                     |                                     |                |                  |
| ENSG00000138629                     | 1775.49014               |                                     | 1654.940936                         | 1532.163995    |                  |
| 1804.657118                         | 2433.660578              |                                     | 2543.059905                         | 1654.198357    |                  |
| 2260.4592                           | -0.450355218             |                                     | 0.006306466                         | 0.050957604    | UBL7             |
| 15                                  | 74445977                 |                                     | 74461182                            | - 1885         |                  |
| protein_coding                      | ubiquitin like 7         | [Source:HGNC Symbol;Acc:HGNC:28221] |                                     |                |                  |
| -                                   | 1957                     | 1870                                | 1318                                | 1742           | 2132 2948        |
| 50.84030586                         | 47.00636763              |                                     | 43.50216811                         | 51.35099224    |                  |
| 69.52215186                         | 72.71887354              |                                     |                                     |                |                  |
| ENSG00000182544                     | 504.4315371              |                                     | 515.0671791                         | 516.1462926    |                  |
| 527.3079639                         | 883.514675               |                                     | 967.0183698                         | 511.8816696    |                  |
| 792.6136696                         | -0.631272677             |                                     | 0.006308845                         | 0.050957604    | MFSD5            |
| 12                                  | 53251251                 |                                     | 53254405                            | + 2581         |                  |
| protein_coding                      | major facilitator        | superfamily domain containing 5     | [Source:HGNC Symbol;Acc:HGNC:28156] |                |                  |
| [Source:HGNC Symbol;Acc:HGNC:28156] | -                        | 556                                 | 582                                 | 444            |                  |
| 509                                 | 774                      | 1121                                | 10.54910149                         | 10.68467757    |                  |
| 10.70290849                         | 10.95826558              |                                     | 18.43318222                         | 20.19522175    |                  |
| ENSG00000186184                     | 1890.711013              |                                     | 2320.457291                         | 2022.735471    |                  |
| 2379.619633                         | 3046.641689              |                                     | 2898.467192                         | 2077.967925    |                  |
| 2774.909505                         | -0.417112423             |                                     | 0.006327187                         | 0.051082429    | POLR1D           |
| 13                                  | 27620742                 |                                     | 27744237                            | + 11210        |                  |
| protein_coding                      | RNA polymerase I and III | subunit D                           | [Source:HGNC                        |                |                  |
| Symbol;Acc:HGNC:20422]              | -                        | 2084                                | 2622                                | 1740           | 2297 2669        |
| 3360                                | 9.103759698              |                                     | 11.08290258                         | 9.657183469    |                  |
| 11.3859016                          | 14.63491894              |                                     | 13.93685183                         |                |                  |

|                                 |                                                   |              |                |             |       |
|---------------------------------|---------------------------------------------------|--------------|----------------|-------------|-------|
| ENSG00000179922                 | 213.203977                                        | 256.6485944  | 240.6357715    |             |       |
| 305.610706                      | 409.7955663                                       | 420.9678541  | 236.8294476    |             |       |
| 378.7913755                     | -0.677968951                                      | 0.006333914  | 0.051113417    | ZNF784      |       |
| 19                              | 55620742                                          | 55624601     | - 2058         |             |       |
| protein_coding                  | zinc finger protein 784 [Source:HGNC              |              |                |             |       |
| Symbol;Acc:HGNC:33111]          | zf-C2H2                                           | 235 290      | 207 295        | 359         |       |
| 488                             | 5.59179415                                        | 6.676964517  | 6.257946149    |             |       |
| 7.965053353                     | 10.72250947                                       | 11.02568218  |                |             |       |
| ENSG00000127585                 | 446.3674753                                       | 459.3124845  | 578.9208416    |             |       |
| 312.8624855                     | 358.428434                                        | 306.2368611  | 494.8669338    |             |       |
| 325.8425935                     | 0.602473966                                       | 0.006343085  | 0.051138304    | FBXL16      |       |
| 16                              | 692498 705829                                     | - 3989       | protein_coding | F-box       |       |
| and leucine rich repeat protein | 16 [Source:HGNC                                   |              |                |             |       |
| Symbol;Acc:HGNC:14150]          | -                                                 | 492 519      | 498 302        | 314         |       |
| 355                             | 6.039900024                                       | 6.164952892  | 7.767337087    |             |       |
| 4.206829883                     | 4.838524806                                       | 4.138046198  |                |             |       |
| ENSG00000161654                 | 788.4010894                                       | 837.2054149  | 884.6561456    |             |       |
| 709.638419                      | 440.6158457                                       | 542.5999595  | 836.7542166    |             |       |
| 564.2847414                     | 0.567670595                                       | 0.006345355  | 0.051138304    | LSM12       |       |
| 17                              | 44034635                                          | 44067619     | - 2811         |             |       |
| protein_coding                  | LSM12 homolog [Source:HGNC Symbol;Acc:HGNC:26407] |              |                |             |       |
| -                               | 869 946                                           | 761 685      | 386 629        |             |       |
| 15.13866624                     | 15.94618255                                       | 16.84343472  | 13.54072037    |             |       |
| 8.440609712                     | 10.4044905                                        |              |                |             |       |
| ENSG00000160145                 | 146.0674055                                       | 92.92449108  | 185.998664     |             |       |
| 73.55376314                     | 71.91398517                                       | 45.7198694   | 141.6635202    |             |       |
| 63.7292059                      | 1.153637163                                       | 0.006347191  | 0.051138304    | KALRN       |       |
| 3                               | 124080023                                         | 124726325    | + 24490        |             |       |
| protein_coding                  | kalirin RhoGEF kinase [Source:HGNC                |              |                |             |       |
| Symbol;Acc:HGNC:4814]           | -                                                 | 161 105      | 160 71         | 63          |       |
| 53                              | 0.321933206                                       | 0.203154738  | 0.406478935    |             |       |
| 0.161094832                     | 0.158124485                                       | 0.100627829  |                |             |       |
| ENSG00000140262                 | 2779.81696                                        | 2073.543644  | 3109.665163    |             |       |
| 2103.016045                     | 2010.167109                                       | 1551.025003  | 2654.341922    |             |       |
| 1888.069386                     | 0.491475047                                       | 0.006348562  | 0.051138304    | TCF12       |       |
| 15                              | 56918623                                          | 57299281     | + 9446         |             |       |
| protein_coding                  | transcription factor 12 [Source:HGNC              |              |                |             |       |
| Symbol;Acc:HGNC:11623]          | bHLH                                              | 3064 2343    | 2675 2030      | 1761        |       |
| 1798                            | 15.88435203                                       | 11.75305553  | 17.61905826    |             |       |
| 11.94153457                     | 11.45931809                                       | 8.850601037  |                |             |       |
| ENSG00000112837                 | 102.5193592                                       | 51.32971888  | 132.5240481    |             |       |
| 53.87036173                     | 25.11282022                                       | 12.93958568  | 95.45770871    |             |       |
| 30.64092254                     | 1.641998375                                       | 0.006358548  | 0.05119543     | TBX18       |       |
| 6                               | 84687351                                          | 84764519     | - 8469         |             |       |
| protein_coding                  | T-box 18 [Source:HGNC Symbol;Acc:HGNC:11595]      |              |                |             |       |
| 113                             | 58 114                                            | 52 22        | 15             | 0.653393777 | T-box |
|                                 | 0.324505679                                       | 0.837489875  | 0.341179756    | 0.159675362 |       |
|                                 | 0.082355033                                       |              |                |             |       |
| ENSG00000259744                 | 0 0                                               | 0 0          | 14.83939377    |             |       |
| 21.56597613                     | 0 12.1351233                                      | -6.078617503 | 0.006369547    |             |       |

|                                                       |                 |                                 |                        |                    |             |
|-------------------------------------------------------|-----------------|---------------------------------|------------------------|--------------------|-------------|
| 0.051260651                                           | AC009269.4      | 15                              | 70848883               |                    |             |
| 70849770                                              | -               | 755                             | sense_intronic         | "novel transcript, |             |
| sense intronic to LARP6"                              | -               | 0                               | 0                      | 0                  | 0           |
| 13                                                    | 25              | 0                               | 0                      | 0                  | 1.058385206 |
| 1.539657334                                           |                 |                                 |                        |                    |             |
| ENSG00000206053                                       | 2376.09028      | 2328.422248                     | 2980.62859             |                    |             |
| 1890.642503                                           | 1996.469207     | 1921.097154                     | 2561.713706            |                    |             |
| 1936.069622                                           | 0.403528491     | 0.006382707                     | 0.051343201            | JPT2               |             |
| 16                                                    | 1678256         | 1702280 +                       | 4768                   | protein_coding     |             |
| Jupiter microtubule associated homolog 2 [Source:HGNC |                 |                                 |                        |                    |             |
| Symbol;Acc:HGNC:14137]                                | -               | 2619                            | 2631                   | 2564               | 1825 1749   |
| 2227                                                  | 26.89849214     | 26.1463483                      | 33.45712514            |                    |             |
| 21.26858835                                           | 22.54763121     | 21.71775795                     |                        |                    |             |
| ENSG00000124831                                       | 2038.592921     | 1860.259812                     | 2111.084836            |                    |             |
| 1557.060648                                           | 1539.872476     | 1530.321666                     | 2003.312523            |                    |             |
| 1542.418263                                           | 0.376952135     | 0.006386495                     | 0.051350326            |                    |             |
| LRRFIP1 2                                             | 237627576       | 237813682                       | +                      | 11901              |             |
| protein_coding                                        | LRR binding     | FLII interacting                | protein 1 [Source:HGNC |                    |             |
| Symbol;Acc:HGNC:6702]                                 | -               | 2247                            | 2102                   | 1816               | 1503 1349   |
| 1774                                                  | 9.245881027     | 8.369041036                     | 9.493781575            |                    |             |
| 7.01758318                                            | 6.967481988     | 6.931084259                     |                        |                    |             |
| ENSG00000095383                                       | 158.768919      | 200.8938998                     | 233.6608216            |                    |             |
| 279.7114936                                           | 295.6463835     | 443.3964693                     | 197.7745468            |                    |             |
| 339.5847821                                           | -0.783368225    | 0.006390329                     | 0.051357809            | TBC1D2             |             |
| 9                                                     | 98198999        | 98255721                        | -                      | 3681               |             |
| protein_coding                                        | TBC1 domain     | family member 2 [Source:HGNC    |                        |                    |             |
| Symbol;Acc:HGNC:18026]                                | -               | 175                             | 227                    | 201                | 270 259     |
| 514                                                   | 2.328096162     | 2.922042179                     | 3.397324934            |                    |             |
| 4.075773022                                           | 4.324952149     | 6.4927446                       |                        |                    |             |
| ENSG00000131473                                       | 10900.62036     | 9187.134685                     | 11144.80745            |                    |             |
| 8766.365404                                           | 8410.51179      | 6503.435762                     | 10410.85416            |                    |             |
| 7893.437652                                           | 0.399448404     | 0.00641124                      | 0.05150246             | ACLY               |             |
| 17                                                    | 41866908        | 41930542                        | -                      | 5217               |             |
| protein_coding                                        | ATP citrate     | lyase [Source:HGNC              | Symbol;Acc:HGNC:115]   |                    |             |
| -                                                     | 12015           | 10381                           | 9587                   | 8462               | 7368 7539   |
| 112.7798784                                           | 94.28547539     | 114.3322466                     | 90.12893264            |                    |             |
| 86.81127618                                           | 67.19298345     |                                 |                        |                    |             |
| ENSG00000077238                                       | 1246.562827     | 1182.353525                     | 1413.589846            |                    |             |
| 928.2277714                                           | 1034.191596     | 859.1884891                     | 1280.835399            |                    |             |
| 940.5359523                                           | 0.44565036      | 0.006442886                     | 0.051733186            | IL4R               |             |
| 16                                                    | 27313668        | 27364778                        | +                      | 5894               |             |
| protein_coding                                        | interleukin 4   | receptor [Source:HGNC           |                        |                    |             |
| Symbol;Acc:HGNC:6015]                                 | -               | 1374                            | 1336                   | 1216               | 896 906     |
| 996                                                   | 11.41577196     | 10.74045717                     | 12.83601719            |                    |             |
| 8.447144468                                           | 9.448555673     | 7.857424651                     |                        |                    |             |
| ENSG00000164346                                       | 1335.473422     | 1435.462138                     | 1403.127421            |                    |             |
| 1156.14084                                            | 961.1361193     | 994.6228192                     | 1391.354327            |                    |             |
| 1037.299926                                           | 0.423614586     | 0.006447449                     | 0.051746336            | NSA2               |             |
| 5                                                     | 74766991        | 74780113                        | +                      | 4962               |             |
| protein_coding                                        | "NSA2, ribosome | biogenesis homolog [Source:HGNC |                        |                    |             |

|                                    |                                                           |             |             |             |        |
|------------------------------------|-----------------------------------------------------------|-------------|-------------|-------------|--------|
| Symbol;Acc:HGNC:30728]" -          | 1472                                                      | 1622        | 1207        | 1116        | 842    |
| 1153                               | 14.52712701                                               | 15.48889839 | 15.1341264  |             |        |
| 12.49739447                        | 10.4304415                                                | 10.80447243 |             |             |        |
| ENSG00000134363                    | 186.893699                                                | 110.6243941 | 181.3486974 |             |        |
| 75.62570013                        | 93.60232991                                               | 22.42861518 | 159.6222635 |             |        |
| 63.88554841                        | 1.327327203                                               | 0.006476613 | 0.051945811 |             | FST    |
| 5                                  | 53480409                                                  | 53487134    | +           | 2969        |        |
| protein_coding                     | follistatin [Source:HGNC Symbol;Acc:HGNC:3971] -          |             |             |             |        |
| 206                                | 125                                                       | 156         | 73          | 82          | 26     |
| 1.994923546                        | 3.269047623                                               | 1.366232796 | 1.697661169 |             |        |
| 0.407187248                        |                                                           |             |             |             |        |
| ENSG00000080189                    | 2205.527098                                               | 2462.056516 | 2166.884435 |             |        |
| 2300.886027                        | 3409.636091                                               | 3936.221964 | 2278.156017 |             |        |
| 3215.581361                        | -0.497291389                                              | 0.006478176 | 0.051945811 |             |        |
| SLC35C2 20                         | 46345980                                                  | 46364458    | -           | 7708        |        |
| protein_coding                     | solute carrier family 35 member C2 [Source:HGNC           |             |             |             |        |
| Symbol;Acc:HGNC:17117] -           | 2431                                                      | 2782        | 1864        | 2221        | 2987   |
| 4563                               | 15.44443184                                               | 17.10180147 | 15.04565325 |             |        |
| 16.01101617                        | 23.81995172                                               | 27.52578928 |             |             |        |
| ENSG00000213793                    | 136.9948959                                               | 87.61452016 | 81.37441549 |             |        |
| 44.54664528                        | 47.94265678                                               | 36.2308399  | 101.9946105 |             |        |
| 42.90671399                        | 1.253545728                                               | 0.006527203 | 0.052315221 |             | ZNF888 |
| 19                                 | 52904417                                                  | 52923481    | -           | 4444        |        |
| protein_coding                     | zinc finger protein 888 [Source:HGNC                      |             |             |             |        |
| Symbol;Acc:HGNC:38695] -           | 151                                                       | 99          | 70          | 43          | 42     |
| 42                                 | 1.6639167                                                 | 1.055571328 | 0.980010743 |             |        |
| 0.537658417                        | 0.580928389                                               | 0.439446751 |             |             |        |
| ENSG00000173818                    | 485.3792668                                               | 620.3816023 | 551.021042  |             |        |
| 661.9838682                        | 829.8645591                                               | 929.0622518 | 552.2606371 |             |        |
| 806.9702264                        | -0.547548834                                              | 0.006534169 | 0.052340747 |             | ENDOV  |
| 17                                 | 80415165                                                  | 80438086    | +           | 7253        |        |
| protein_coding                     | endonuclease V [Source:HGNC Symbol;Acc:HGNC:26640]        |             |             |             |        |
| -                                  | 535                                                       | 701         | 474         | 639         | 727    |
| 3.612141777                        | 4.579591929                                               | 4.066001278 | 4.895479365 |             |        |
| 6.161182789                        | 6.904449285                                               |             |             |             |        |
| ENSG00000268520                    | 0                                                         | 0           | 2.3249833   | 18.64743291 |        |
| 11.41491828                        | 17.25278091                                               | 0.774994433 |             |             |        |
| 15.7717107                         | -4.486317983                                              | 0.006536306 | 0.052340747 |             |        |
| AC008750.5                         | 19                                                        | 51361712    | 51365544    | -           | 473    |
|                                    | sense_intronic "novel transcript, sense intronic to ETFB" |             |             |             |        |
| -                                  | 0                                                         | 0           | 2           | 18          | 10     |
| 0                                  | 0.263072651                                               | 2.114576532 | 1.29952973  | 20          | 0      |
| 1.966074059                        |                                                           |             |             |             |        |
| ENSG00000130414                    | 726.7080237                                               | 681.4462679 | 880.006179  |             |        |
| 467.2217912                        | 606.1321608                                               | 498.6053682 | 762.7201569 |             |        |
| 523.98644                          | 0.541487851                                               | 0.006544705 | 0.052384295 |             |        |
| NDUFA10 2                          | 239892450                                                 | 240025402   | -           | 9517        |        |
| protein_coding                     | NADH:ubiquinone oxidoreductase subunit A10                |             |             |             |        |
| [Source:HGNC Symbol;Acc:HGNC:7684] | -                                                         | -           | 801         | 770         | 757    |
| 451                                | 531                                                       | 578         | 4.121555291 | 3.833690924 |        |



|                                             |                                                      |             |             |                        |
|---------------------------------------------|------------------------------------------------------|-------------|-------------|------------------------|
| 4.948831384                                 | 2.633228314                                          | 3.429586903 | 2.823961602 |                        |
| ENSG00000259207                             | 77.11633211                                          | 78.76456863 | 132.5240481 |                        |
| 42.47470829                                 | 35.38624667                                          | 3.450556181 | 96.13498294 |                        |
| 27.10383705                                 | 1.834666772                                          | 0.006550737 | 0.052408855 | ITGB3                  |
| 17                                          | 47253846                                             | 47311816    | + 4394      |                        |
| protein_coding                              | integrin subunit beta 3 [Source:HGNC                 |             |             |                        |
| Symbol;Acc:HGNC:6156]                       | -                                                    | 85          | 89          | 114 41 31              |
| 4                                           | 0.947300042                                          | 0.959746186 | 1.614178823 |                        |
| 0.518484584                                 | 0.433659637                                          | 0.042328313 |             |                        |
| ENSG00000139233                             | 601.5073904                                          | 836.3204197 | 590.5457581 |                        |
| 967.5945742                                 | 885.7976587                                          | 1080.886724 | 676.1245228 |                        |
| 978.0929855                                 | -0.532232135                                         | 0.006555984 | 0.052427128 | LLPH                   |
| 12                                          | 66116555                                             | 66130768    | - 7993      |                        |
| protein_coding                              | "LLP homolog, long-term synaptic facilitation factor |             |             |                        |
| [Source:HGNC Symbol;Acc:HGNC:28229]"        | -                                                    | 663         | 945         | 508                    |
| 934                                         | 776                                                  | 1253        | 4.061929665 | 5.602068777            |
| 3.954219249                                 | 6.493055378                                          | 5.967593998 | 7.289072605 |                        |
| ENSG00000150051                             | 9.979760626                                          | 13.2749273  | 6.974949899 |                        |
| 48.69051926                                 | 59.35757507                                          | 21.56597613 | 10.07654594 |                        |
| 43.20469015                                 | -2.087926321                                         | 0.006565459 | 0.05247917  | MKX                    |
| 10                                          | 27672875                                             | 27746060    | - 4106      |                        |
| protein_coding                              | mohawk homeobox [Source:HGNC Symbol;Acc:HGNC:23729]  |             |             |                        |
| Others                                      | 11                                                   | 15          | 6           | 47 52 25               |
| 0.131190511                                 | 0.173100672                                          | 0.090915755 | 0.63604956  |                        |
| 0.778451857                                 | 0.283107961                                          |             |             |                        |
| ENSG00000260000                             | 46.26979926                                          | 35.39980612 | 25.5748163  |                        |
| 6.215810969                                 | 10.27342645                                          | 0           | 35.74814056 | 5.496412474            |
| 2.732578937                                 | 0.006570587                                          | 0.052496436 | AL133338.1  |                        |
| 6                                           | 100881471                                            | 100882987   | + 1517      |                        |
| antisense                                   | "novel transcript, antisense to ASCC3" - 51          |             |             |                        |
| 40                                          | 22                                                   | 6           | 9           | 0 1.646316303          |
| 1.249398129                                 | 0.902285434                                          | 0.219774709 | 0.36467357  | 0                      |
| ENSG00000104412                             | 652.3134445                                          | 604.4516896 | 618.4455577 |                        |
| 461.0059802                                 | 460.0212068                                          | 376.9732628 | 625.0702306 |                        |
| 432.6668166                                 | 0.53197465                                           | 0.006573895 | 0.052499155 | EMC2                   |
| 8                                           | 108443601                                            | 108486918   | + 3781      |                        |
| protein_coding                              | ER membrane protein complex subunit 2 [Source:HGNC   |             |             |                        |
| Symbol;Acc:HGNC:28963]                      | -                                                    | 719         | 683         | 532 445 403            |
| 437                                         | 9.312170018                                          | 8.559343727 | 8.754106011 |                        |
| 6.539813708                                 | 6.55157518                                           | 5.374100425 |             |                        |
| ENSG00000135930                             | 1183.962511                                          | 1215.98334  | 1253.165999 |                        |
| 1464.859452                                 | 1768.170842                                          | 1608.821819 | 1217.70395  |                        |
| 1613.950704                                 | -0.406417506                                         | 0.006577668 | 0.052505584 | EIF4E2                 |
| 2                                           | 232550052                                            | 232583644   | + 7177      |                        |
| protein_coding                              | eukaryotic translation initiation factor 4E family   |             |             |                        |
| member 2 [Source:HGNC Symbol;Acc:HGNC:3293] | -                                                    | 1305        | 1374        |                        |
| 1078                                        | 1414                                                 | 1549        | 1865        | 8.90422753 9.071314568 |
| 9.345072203                                 | 10.94758956                                          | 13.26648382 | 12.08278111 |                        |
| ENSG00000108588                             | 3278.804991                                          | 2947.918855 | 3368.900801 |                        |
| 2837.517708                                 | 2044.411864                                          | 2292.031943 | 3198.541549 |                        |

|                        |                                 |                        |                       |                    |
|------------------------|---------------------------------|------------------------|-----------------------|--------------------|
| 2391.320505            | 0.419378204                     | 0.006588329            | 0.052566961           | CCDC47             |
| 17                     | 63745250                        | 63776351               | - 4537                |                    |
| protein_coding         | coiled-coil domain containing   | 47                     | [Source:HGNC          |                    |
| Symbol;Acc:HGNC:24856] | -                               | 3614 3331              | 2898 2739             | 1791               |
| 2657                   | 39.00749419                     | 34.78822692            | 39.74078564           |                    |
| 33.54557934            | 24.26465757                     | 27.23038573            |                       |                    |
| ENSG00000275091        | 0 0                             | 0 0                    | 25.11282022           |                    |
| 11.21430759            | 0                               | 12.1090426             | -6.071937865          | 0.006645214        |
| 0.052990008            | AC022098.4                      | 19                     | 14006422              |                    |
| 14006773               | +                               | 352                    | antisense             | "novel transcript, |
| antisense to RFX1"     | -                               | 0 0                    | 0 0                   | 22                 |
| 13                     | 0 0                             | 0 0                    | 3.841734764           |                    |
| 1.717242811            |                                 |                        |                       |                    |
| ENSG00000091831        | 2.721752898                     | 13.2749273             | 3.48747495            |                    |
| 68.37392066            | 34.24475485                     | 13.80222472            | 6.494718381           |                    |
| 38.80696674            | -2.56236545                     | 0.006647342            | 0.052990008           | ESR1               |
| 6                      | 151656691                       | 152129619              | + 13854               |                    |
| protein_coding         | estrogen receptor 1             | [Source:HGNC           | Symbol;Acc:HGNC:3467] |                    |
| ESR-like               | 3                               | 15                     | 3                     | 66 30 16           |
| 0.010604123            | 0.051302971                     | 0.013472647            | 0.264716368           |                    |
| 0.133104712            | 0.053700189                     |                        |                       |                    |
| ENSG00000064703        | 1633.051739                     | 1616.00115             | 1613.53841            |                    |
| 2017.03066             | 2028.430979                     | 2234.235127            | 1620.863766           |                    |
| 2093.232255            | -0.369204832                    | 0.006650748            | 0.05299328            | DDX20              |
| 1                      | 111755245                       | 111768016              | + 6019                |                    |
| protein_coding         | DEAD-box helicase 20            | [Source:HGNC           |                       |                    |
| Symbol;Acc:HGNC:2743]  | -                               | 1800 1826              | 1388 1947             | 1777               |
| 2590                   | 14.64457745                     | 14.37483508            | 14.34735913           |                    |
| 17.97436894            | 18.14723423                     | 20.00812716            |                       |                    |
| ENSG00000182118        | 288.5058072                     | 315.9432697            | 377.8097862           |                    |
| 406.09965              | 562.7554713                     | 547.7757938            | 327.419621            |                    |
| 505.5436383            | -0.6282578                      | 0.006656617            | 0.053016164           | FAM89A             |
| 1                      | 231018958                       | 231040246              | - 2394                |                    |
| protein_coding         | family with sequence similarity | 89 member A            |                       |                    |
| [Source:HGNC           | Symbol;Acc:HGNC:25057]          | -                      | 318 357               | 325                |
| 392                    | 493 635                         | 6.504765692            | 7.065949201           |                    |
| 8.446291417            | 9.098587261                     | 12.65814696            | 12.33333697           |                    |
| ENSG00000214194        | 649.5916916                     | 498.2522712            | 560.3209752           |                    |
| 416.459335             | 405.229599                      | 307.0995001            | 569.3883127           |                    |
| 376.2628114            | 0.59914581                      | 0.006672859            | 0.0531216             | SMIM30             |
| 7                      | 113116718                       | 113118613              | - 1896                |                    |
| protein_coding         | small integral membrane protein | 30                     | [Source:HGNC          |                    |
| Symbol;Acc:HGNC:48953] | -                               | 716 563                | 482 402               | 355                |
| 356                    | 18.49282981                     | 14.07007792            | 15.81668815           |                    |
| 11.78147765            | 11.50899444                     | 8.730571695            |                       |                    |
| ENSG00000246273        | 117.0353746                     | 70.79961225            | 41.8496994            |                    |
| 196.834014             | 128.9885766                     | 183.7421166            | 76.56156209           |                    |
| 169.8549024            | -1.145160018                    | 0.006694196            | 0.053224044           | SBF2-              |
| AS1                    | 11                              | 9758292 9811335        | + 4644                | antisense          |
| antisense RNA 1        | [Source:HGNC                    | Symbol;Acc:HGNC:27438] | -                     | 129                |

|                                       |                                                |          |             |      |             |        |
|---------------------------------------|------------------------------------------------|----------|-------------|------|-------------|--------|
| 80                                    | 36                                             | 190      | 113         | 213  | 1.360273329 |        |
| 0.816251922                           | 0.482299861                                    |          | 2.273387321 |      | 1.495662458 |        |
| 2.132644223                           |                                                |          |             |      |             |        |
| ENSG00000271601                       | 2252.704149                                    |          | 2170.008115 |      | 2408.682699 |        |
| 1890.642503                           | 1731.643103                                    |          | 1638.151547 |      | 2277.131654 |        |
| 1753.479051                           | 0.376956178                                    |          | 0.006695026 |      | 0.053224044 | LIX1L  |
| 1                                     | 145933423                                      |          | 145958001   |      | - 3975      |        |
| protein_coding                        | limb and CNS expressed 1 like [Source:HGNC     |          |             |      |             |        |
| Symbol;Acc:HGNC:28715]                | -                                              |          | 2483        | 2452 | 2072        | 1825   |
| 1899                                  | 30.58921064                                    |          | 29.22871844 |      | 32.43093462 | 1517   |
| 25.51160485                           | 23.45826068                                    |          | 22.21359502 |      |             |        |
| ENSG00000143537                       | 1813.594681                                    |          | 1897.429608 |      | 2172.696894 |        |
| 1224.514761                           | 1757.897415                                    |          | 1246.51342  |      | 1961.240394 |        |
| 1409.641866                           | 0.476828384                                    |          | 0.006696096 |      | 0.053224044 | ADAM15 |
| 1                                     | 155050566                                      |          | 155062775   |      | + 6584      |        |
| protein_coding                        | ADAM metalloproteinase domain 15 [Source:HGNC  |          |             |      |             |        |
| Symbol;Acc:HGNC:193]                  | -                                              |          | 1999        | 2144 | 1869        | 1182   |
| 1445                                  | 14.86796929                                    |          | 15.42983918 |      | 17.66144876 | 1540   |
| 9.975615423                           | 14.37733059                                    |          | 10.20490681 |      |             |        |
| ENSG00000071553                       | 2776.187956                                    |          | 2971.813724 |      | 3685.09853  |        |
| 2346.468641                           | 2519.272465                                    |          | 2264.427494 |      | 3144.366737 |        |
| 2376.722867                           | 0.403545948                                    |          | 0.006697763 |      | 0.053224044 |        |
| ATP6AP1 X                             | 154428632                                      |          | 154436516   |      | + 4884      |        |
| protein_coding                        | ATPase H+ transporting accessory protein 1     |          |             |      |             |        |
| [Source:HGNC Symbol;Acc:HGNC:868]     | -                                              |          |             |      | 3060        | 3358   |
| 2265                                  | 2207                                           | 2625     | 30.68134928 |      | 32.57852948 | 3170   |
| 40.38224446                           | 25.76941708                                    |          | 27.77627723 |      | 24.99105962 |        |
| ENSG00000109171                       | 1738.292851                                    |          | 1594.761266 |      | 1536.813961 |        |
| 2095.764265                           | 2088.930046                                    |          | 2111.740383 |      | 1623.289359 |        |
| 2098.811565                           | -0.370391354                                   |          | 0.006704995 |      | 0.053257589 | SLAIN2 |
| 4                                     | 48341322                                       |          | 48426212    |      | + 6524      |        |
| protein_coding                        | SLAIN motif family member 2 [Source:HGNC       |          |             |      |             |        |
| Symbol;Acc:HGNC:29282]                | -                                              |          | 1916        | 1802 | 1322        | 2023   |
| 2448                                  | 14.38170036                                    |          | 13.08781885 |      | 12.60736567 | 1830   |
| 17.23034503                           | 17.24187521                                    |          | 17.44731007 |      |             |        |
| ENSG00000142669                       | 3466.605941                                    |          | 4221.42688  |      | 4445.368069 |        |
| 4200.852247                           | 5990.549114                                    |          | 6562.957856 |      | 4044.466964 |        |
| 5584.786406                           | -0.465780197                                   |          | 0.006738458 |      | 0.053499361 |        |
| SH3BGRL3                              | 1                                              | 26279176 | 26281522    |      | + 1786      |        |
| protein_coding                        | SH3 domain binding glutamate rich protein like |          |             |      |             |        |
| 3 [Source:HGNC Symbol;Acc:HGNC:15568] | -                                              |          |             |      | 3821        | 4770   |
| 4055                                  | 5248                                           | 7608     | 104.7669418 |      | 126.5503543 | 3824   |
| 133.2119776                           | 126.1599324                                    |          | 180.6174606 |      | 198.070623  |        |
| ENSG00000166347                       | 542.5360777                                    |          | 584.0968011 |      | 632.3954575 |        |
| 355.3371938                           | 380.1167788                                    |          | 458.061333  |      | 586.3427788 |        |
| 397.8384352                           | 0.557802321                                    |          | 0.006747199 |      | 0.053544728 | CYB5A  |
| 18                                    | 74250847                                       |          | 74292016    |      | - 9313      |        |
| protein_coding                        | cytochrome b5 type A [Source:HGNC              |          |             |      |             |        |
| Symbol;Acc:HGNC:2570]                 | -                                              |          | 598         | 660  | 544         | 343    |
| 531                                   | 3.144417934                                    |          | 3.358000631 |      | 3.634261249 | 333    |

|                                                                       |              |             |             |                |             |
|-----------------------------------------------------------------------|--------------|-------------|-------------|----------------|-------------|
| 2.046522674                                                           | 2.197869948  | 2.651159986 |             |                |             |
| ENSG00000166831                                                       | 33.56828574  | 6.194966072 | 43.01219105 | 0              |             |
|                                                                       | 6.848950969  | 0           | 27.59181429 | 2.282983656    |             |
| 3.648683263                                                           | 0.006769675  | 0.053699002 | RBPMS2      | 15             |             |
| 64739892                                                              | 64775587     | -           | 2101        | protein_coding | "RNA        |
| binding protein, mRNA processing factor 2 [Source:HGNC                |              |             |             |                |             |
| Symbol;Acc:HGNC:19098]" -                                             |              |             |             |                |             |
|                                                                       |              | 37          | 7           | 37             | 0           |
|                                                                       | 0            | 0.862391277 | 0.157869571 | 1.095676932    | 0           |
|                                                                       | 0.175538571  | 0           |             |                |             |
| ENSG0000003436                                                        | 921.7669814  | 788.5306814 | 1390.340013 |                |             |
| 750.0411903                                                           | 644.9428829  | 663.3694258 | 1033.545892 |                |             |
| 686.117833                                                            | 0.589784297  | 0.006776889 | 0.053732131 | TFPI           |             |
|                                                                       | 2            | 187464230   | 187565760   | -              | 11714       |
| protein_coding tissue factor pathway inhibitor [Source:HGNC           |              |             |             |                |             |
| Symbol;Acc:HGNC:11760] -                                              |              |             |             |                |             |
|                                                                       | 769          | 4.247341409 | 3.604117367 | 6.352326419    | 565         |
| 3.434356622                                                           | 2.964767139  | 3.052475158 |             |                |             |
| ENSG00000108587                                                       | 1774.582889  | 1615.116154 | 1511.239145 |                |             |
| 1983.879668                                                           | 2188.239835  | 2238.548322 | 1633.646063 |                |             |
| 2136.889275                                                           | -0.387131469 | 0.00678185  | 0.053742314 | GOSR1          |             |
|                                                                       | 17           | 30477362    | 30527592    | +              | 9855        |
| protein_coding golgi SNAP receptor complex member 1 [Source:HGNC      |              |             |             |                |             |
| Symbol;Acc:HGNC:4430] -                                               |              |             |             |                |             |
|                                                                       | 2595         | 9.719432442 | 8.774708158 | 8.207172664    | 1917        |
| 10.79752438                                                           | 11.95674162  | 12.24367383 |             |                |             |
| ENSG00000102393                                                       | 893.6422015  | 808.0005748 | 932.3183032 |                |             |
| 553.2071763                                                           | 585.5853079  | 721.1662419 | 877.9870265 |                |             |
| 619.986242                                                            | 0.50050125   | 0.006784249 | 0.053742314 | GLA            |             |
|                                                                       | X            | 101397803   | 101408012   | -              | 2275        |
| protein_coding galactosidase alpha [Source:HGNC Symbol;Acc:HGNC:4296] |              |             |             |                |             |
|                                                                       | -            | 985         | 913         | 802            | 534         |
|                                                                       |              |             |             | 513            | 836         |
| 21.20232626                                                           | 19.01585326  | 21.93308966 | 13.04283198 |                |             |
| 13.86064129                                                           | 17.08660952  |             |             |                |             |
| ENSG00000085719                                                       | 2416.916573  | 2185.053033 | 2358.695558 |                |             |
| 3263.300759                                                           | 3157.366397  | 2644.851313 | 2320.221721 |                |             |
| 3021.839489                                                           | -0.380949028 | 0.006792661 | 0.053784862 | CPNE3          |             |
|                                                                       | 8            | 86514427    | 86561498    | +              | 6745        |
| protein_coding copine 3 [Source:HGNC Symbol;Acc:HGNC:2316] -          |              |             |             |                |             |
|                                                                       | 2664         | 2469        | 2029        | 3150           | 2766        |
|                                                                       |              |             |             | 3066           | 19.34109019 |
|                                                                       | 17.34465144  | 18.71573726 | 25.95019606 | 25.20679225    |             |
|                                                                       | 21.13592283  |             |             |                |             |
| ENSG00000143774                                                       | 3355.921323  | 4376.301032 | 4501.167668 |                |             |
| 4386.290607                                                           | 6022.510885  | 6378.353101 | 4077.796675 |                |             |
| 5595.718198                                                           | -0.456744213 | 0.006798046 | 0.053803415 | GUK1           |             |
|                                                                       | 1            | 228139962   | 228148984   | +              | 4725        |
| protein_coding guanylate kinase 1 [Source:HGNC Symbol;Acc:HGNC:4693]  |              |             |             |                |             |
|                                                                       | -            | 3699        | 4945        | 3872           | 4234        |
|                                                                       |              |             |             | 5276           | 7394        |
| 38.3363889                                                            | 49.58963639  | 50.98476036 | 49.79217352 |                |             |
| 68.63574218                                                           | 72.76267411  |             |             |                |             |
| ENSG00000158270                                                       | 114.3136217  | 115.9343651 | 232.49833   |                |             |

|                                                                                        |               |             |                 |        |  |
|----------------------------------------------------------------------------------------|---------------|-------------|-----------------|--------|--|
| 34.18696033                                                                            | 108.4417237   | 37.95611799 | 154.2487723     |        |  |
| 60.194934                                                                              | 1.361519059   | 0.006813986 | 0.053905458     |        |  |
| COLEC12 18                                                                             | 316740 500722 | - 7340      | protein_coding  |        |  |
| collectin subfamily member 12 [Source:HGNC Symbol;Acc:HGNC:16016]                      |               |             |                 |        |  |
| -                                                                                      | 126 131       | 200 33      | 95 44           |        |  |
| 0.840626678                                                                            | 0.845671465   | 1.695277439 | 0.249821564     |        |  |
| 0.795563602                                                                            | 0.278732516   |             |                 |        |  |
| ENSG00000171453                                                                        | 686.7889812   | 869.0652404 | 787.006847      |        |  |
| 1028.716715                                                                            | 955.4286602   | 1374.183999 | 780.9536895     |        |  |
| 1119.443125                                                                            | -0.520350976  | 0.006817615 | 0.053910056     | POLR1C |  |
| 6                                                                                      | 43509702      | 43562419    | + 5550          |        |  |
| protein_coding RNA polymerase I and III subunit C [Source:HGNC Symbol;Acc:HGNC:20194]  | -             | 757 982     | 677 993         | 837    |  |
| 1593                                                                                   | 6.679309685   | 8.383877914 | 7.589314183     |        |  |
| 9.941875243                                                                            | 9.270002154   | 13.34608267 |                 |        |  |
| ENSG00000112996                                                                        | 1462.488557   | 1361.122545 | 1377.552605     |        |  |
| 1794.297433                                                                            | 1776.161285   | 1877.965202 | 1400.387903     |        |  |
| 1816.141306                                                                            | -0.375121734  | 0.006830606 | 0.053978614     | MRPS30 |  |
| 5                                                                                      | 44808925      | 44820428    | + 6202          |        |  |
| protein_coding mitochondrial ribosomal protein S30 [Source:HGNC Symbol;Acc:HGNC:8769]  | -             | 1612 1538   | 1185 1732       | 1556   |  |
| 2177                                                                                   | 12.72805253   | 11.75035572 | 11.88757952     |        |  |
| 15.51772923                                                                            | 15.42144932   | 16.3214104  |                 |        |  |
| ENSG00000187189                                                                        | 813.8041165   | 688.5262291 | 734.6947227     |        |  |
| 996.6016921                                                                            | 1015.927727   | 1032.578937 | 745.6750228     |        |  |
| 1015.036119                                                                            | -0.444918056  | 0.006832388 | 0.053978614     | TSPYL4 |  |
| 6                                                                                      | 116249961     | 116254140   | - 4180          |        |  |
| protein_coding TSPY like 4 [Source:HGNC Symbol;Acc:HGNC:21559]                         | -             |             |                 |        |  |
| 897                                                                                    | 778 632       | 962 890     | 1197 10.5085996 |        |  |
| 8.819211463                                                                            | 9.406924169   | 12.78824164 | 13.08763231     |        |  |
| 13.31523657                                                                            |               |             |                 |        |  |
| ENSG00000213390                                                                        | 435.4804637   | 410.637751  | 545.2085838     |        |  |
| 362.5889732                                                                            | 261.4016287   | 257.9290745 | 463.7755995     |        |  |
| 293.9732255                                                                            | 0.656948083   | 0.006843108 | 0.054026714     |        |  |
| ARHGAP19                                                                               | 10 97222173   | 97292673    | - 6167          |        |  |
| protein_coding Rho GTPase activating protein 19 [Source:HGNC Symbol;Acc:HGNC:23724]    | -             | 480 464     | 469 350         | 229    |  |
| 299                                                                                    | 3.811500425   | 3.565089794 | 4.731575135     |        |  |
| 3.153596606                                                                            | 2.282490056   | 2.254385892 |                 |        |  |
| ENSG00000147586                                                                        | 361.9931354   | 385.8578868 | 362.6973948     |        |  |
| 222.7332264                                                                            | 232.8643329   | 262.2422698 | 370.1828057     |        |  |
| 239.279943                                                                             | 0.628752777   | 0.006844585 | 0.054026714     | MRPS28 |  |
| 8                                                                                      | 79918717      | 80030289    | - 1817          |        |  |
| protein_coding mitochondrial ribosomal protein S28 [Source:HGNC Symbol;Acc:HGNC:14513] | -             | 399 436     | 312 215         | 204    |  |
| 304                                                                                    | 10.75342107   | 11.36993555 | 10.68332679     |        |  |
| 6.574997261                                                                            | 6.901168007   | 7.779463982 |                 |        |  |
| ENSG00000166508                                                                        | 7836.833844   | 9055.270407 | 8772.16199      |        |  |
| 6573.2201                                                                              | 6966.524627   | 6945.106954 | 8554.755414     |        |  |
| 6828.283894                                                                            | 0.325169872   | 0.006868451 | 0.054190918     | MCM7   |  |

|                                     |                                                                          |           |             |             |            |                |
|-------------------------------------|--------------------------------------------------------------------------|-----------|-------------|-------------|------------|----------------|
| 7                                   | 100092728                                                                | 100101940 | -           | 4386        |            |                |
| protein_coding                      | minichromosome maintenance complex component 7                           |           |             |             |            |                |
| [Source:HGNC Symbol;Acc:HGNC:6950]  |                                                                          |           | -           | 8638        | 10232      | 7546           |
| 6345                                | 6103                                                                     | 8051      | 96.44356509 | 110.5397161 |            |                |
| 107.0421985                         | 80.38500493                                                              |           | 85.53071505 | 85.35170821 |            |                |
| ENSG00000065328                     | 1477.004573                                                              |           | 1392.982371 | 1255.490982 |            |                |
| 1160.284714                         | 988.5319232                                                              |           | 831.5840396 | 1375.159309 |            |                |
| 993.4668924                         | 0.470032361                                                              |           | 0.006879152 | 0.054251147 |            | MCM10          |
| 10                                  | 13161554                                                                 |           | 13211104    | +           | 5454       |                |
| protein_coding                      | minichromosome maintenance 10 replication initiation factor              |           |             |             |            |                |
| [Source:HGNC Symbol;Acc:HGNC:18043] |                                                                          |           | -           | 1628        | 1574       |                |
| 1080                                | 1120                                                                     | 866       | 964         | 14.61732659 | 13.6746442 |                |
| 12.32013505                         | 11.4107695                                                               |           | 9.760006763 | 8.218506792 |            |                |
| ENSG00000064115                     | 1309.163144                                                              |           | 1274.39302  | 1250.841015 |            |                |
| 1016.285093                         | 997.6638578                                                              |           | 829.8587616 | 1278.132393 |            |                |
| 947.9359043                         | 0.432030746                                                              |           | 0.006885139 | 0.054261012 |            | TM7SF3         |
| 12                                  | 26973195                                                                 |           | 27014434    | -           | 3888       |                |
| protein_coding                      | transmembrane 7 superfamily member 3 [Source:HGNC Symbol;Acc:HGNC:23049] |           |             |             |            |                |
|                                     | -                                                                        | 1443      | 1440        | 1076        | 981        | 874            |
| 962                                 | 18.17476309                                                              |           | 17.54941632 | 17.21840274 |            |                |
| 14.02021891                         | 13.81759746                                                              |           | 11.50482015 |             |            |                |
| ENSG00000077458                     | 653.2206955                                                              |           | 541.6170337 | 563.8084502 |            |                |
| 381.2364061                         | 409.7955663                                                              |           | 420.9678541 | 586.2153931 |            |                |
| 403.9999422                         | 0.537067328                                                              |           | 0.006886588 | 0.054261012 |            | FAM76B         |
| 11                                  | 95768942                                                                 |           | 95790409    | -           | 6042       |                |
| protein_coding                      | family with sequence similarity 76 member B                              |           |             |             |            |                |
| [Source:HGNC Symbol;Acc:HGNC:28492] |                                                                          |           | -           | 720         | 612        | 485            |
| 368                                 | 359                                                                      | 488       | 5.835532055 | 4.799512665 |            |                |
| 4.99422224                          | 3.384380167                                                              |           | 3.652254962 | 3.755520346 |            |                |
| ENSG00000182310                     | 68.95107341                                                              |           | 46.90474312 | 82.53690714 |            | 0              |
| 11.41491828                         | 28.46708849                                                              |           | 66.13090789 | 13.29400226 |            |                |
| 2.299578302                         | 0.006889606                                                              |           | 0.054261012 | SPACA6      | 19         |                |
| 51689128                            | 51712387                                                                 |           | +           | 4103        |            | protein_coding |
|                                     | sperm acrosome associated 6 [Source:HGNC Symbol;Acc:HGNC:27113]          |           |             |             |            |                |
|                                     | -                                                                        | 76        | 53          | 71          | 0          | 10             |
| 33                                  | 0.907069907                                                              |           | 0.612069577 | 1.076623062 |            | 0              |
| 0.149811738                         | 0.373975749                                                              |           |             |             |            |                |
| ENSG00000275496                     | 103.4266101                                                              |           | 80.53455893 | 87.18687374 |            |                |
| 15.53952742                         | 50.22564044                                                              |           | 1.725278091 | 90.38268093 |            |                |
| 22.49681532                         | 2.0213888                                                                |           | 0.006897213 | 0.054296748 |            |                |
| CU633906.1                          | 21                                                                       | 6228966   | 6267317     | -           | 2878       | lincRNA        |
| uncharacterized                     | LOC102724701 [Source:NCBI gene;Acc:102724701]                            |           |             |             |            |                |
|                                     |                                                                          |           |             |             |            | -              |
| 114                                 | 91                                                                       | 75        | 15          | 44          | 2          | 1.939736533    |
| 1.498225014                         | 1.621352033                                                              |           | 0.289609306 | 0.93974332  |            |                |
| 0.032312475                         |                                                                          |           |             |             |            |                |
| ENSG00000162298                     | 1583.152936                                                              |           | 1660.250907 | 1394.98998  |            |                |
| 2077.116832                         | 1901.725386                                                              |           | 2102.251353 | 1546.131274 |            |                |
| 2027.03119                          | -0.390365676                                                             |           | 0.006901484 | 0.054306209 |            | SYVN1          |
| 11                                  | 65121780                                                                 |           | 65134533    | -           | 5496       |                |
| protein_coding                      | synoviolin 1 [Source:HGNC Symbol;Acc:HGNC:20738]                         |           |             |             |            |                |

|                                                  |                                                     |         |             |      |             |      |        |  |
|--------------------------------------------------|-----------------------------------------------------|---------|-------------|------|-------------|------|--------|--|
| -                                                | 1745                                                | 1876    | 1200        | 2005 | 1666        | 2437 |        |  |
| 15.54810235                                      | 16.17381796                                         |         | 13.58442839 |      | 20.27121111 |      |        |  |
| 18.63269321                                      | 20.61768135                                         |         |             |      |             |      |        |  |
| ENSG00000115758                                  | 5201.269788                                         |         | 5494.934906 |      | 5478.823146 |      |        |  |
| 6062.487632                                      | 7047.570547                                         |         | 7438.536487 |      | 5391.675947 |      |        |  |
| 6849.531556                                      | -0.345370455                                        |         | 0.006908452 |      | 0.054336866 |      | ODC1   |  |
| 2                                                | 10439968                                            |         | 10448504    |      | -           | 2968 |        |  |
| protein_coding                                   | ornithine decarboxylase 1 [Source:HGNC              |         |             |      |             |      |        |  |
| Symbol;Acc:HGNC:8109]                            | -                                                   |         | 5733        | 6209 | 4713        | 5852 | 6174   |  |
| 8623                                             | 94.59032741                                         |         | 99.1252291  |      | 98.79623392 |      |        |  |
| 109.5601112                                      | 127.8645306                                         |         | 135.0907173 |      |             |      |        |  |
| ENSG00000185504                                  | 1333.65892                                          |         | 1728.395534 |      | 1342.677856 |      |        |  |
| 1640.974096                                      | 2056.968274                                         |         | 2527.532403 |      | 1468.244103 |      |        |  |
| 2075.158258                                      | -0.499155215                                        |         | 0.006911774 |      | 0.054338828 |      |        |  |
| FAAP100 17                                       | 81539885                                            |         | 81553961    |      | -           | 5354 |        |  |
| protein_coding                                   | FA core complex associated protein 100 [Source:HGNC |         |             |      |             |      |        |  |
| Symbol;Acc:HGNC:26171]                           | -                                                   |         | 1470        | 1953 | 1155        | 1584 | 1802   |  |
| 2930                                             | 13.44521191                                         |         | 17.28424116 |      | 13.42179076 |      |        |  |
| 16.43950945                                      | 20.68825116                                         |         | 25.44604387 |      |             |      |        |  |
| ENSG00000150593                                  | 587.898626                                          |         | 478.7823778 |      | 540.5586172 |      |        |  |
| 416.459335                                       | 288.7974325                                         |         | 351.9567305 |      | 535.7465403 |      |        |  |
| 352.4044993                                      | 0.603505139                                         |         | 0.006921002 |      | 0.054379163 |      | PDCD4  |  |
| 10                                               | 110871795                                           |         | 110900006   |      | +           | 4547 |        |  |
| protein_coding                                   | programmed cell death 4 [Source:HGNC                |         |             |      |             |      |        |  |
| Symbol;Acc:HGNC:8763]                            | -                                                   |         | 648         | 541  | 465         | 402  | 253    |  |
| 408                                              | 6.978767585                                         |         | 5.637658327 |      | 6.362603284 |      |        |  |
| 4.912619667                                      | 3.420132466                                         |         | 4.172210647 |      |             |      |        |  |
| ENSG00000160439                                  | 206.8532202                                         |         | 230.0987398 |      | 204.5985304 |      |        |  |
| 320.1142649                                      | 320.7592037                                         |         | 370.9347895 |      | 213.8501635 |      |        |  |
| 337.2694194                                      | -0.657415365                                        |         | 0.006923052 |      | 0.054379163 |      | RDH13  |  |
| 19                                               | 55039108                                            |         | 55071291    |      | -           | 8594 |        |  |
| protein_coding                                   | retinol dehydrogenase 13 [Source:HGNC               |         |             |      |             |      |        |  |
| Symbol;Acc:HGNC:19978]                           | -                                                   |         | 228         | 260  | 176         | 309  | 281    |  |
| 430                                              | 1.299176575                                         |         | 1.433522254 |      | 1.274160581 |      |        |  |
| 1.997906564                                      | 2.009825401                                         |         | 2.326505719 |      |             |      |        |  |
| ENSG00000136048                                  | 475.3995062                                         |         | 433.647625  |      | 448.7217769 |      |        |  |
| 173.0067386                                      | 240.8547757                                         |         | 381.286458  |      | 452.589636  |      |        |  |
| 265.0493241                                      | 0.769336531                                         |         | 0.006927575 |      | 0.054390307 |      | DRAM1  |  |
| 12                                               | 101877351                                           |         | 102012130   |      | +           | 4180 |        |  |
| protein_coding                                   | DNA damage regulated autophagy modulator 1          |         |             |      |             |      |        |  |
| [Source:HGNC Symbol;Acc:HGNC:25645]              | -                                                   |         |             |      | 524         | 490  | 386    |  |
| 167                                              | 211                                                 | 442     | 6.138802888 |      | 5.554516217 |      |        |  |
| 5.745368243                                      | 2.21999621                                          |         | 3.102798221 |      | 4.916737312 |      |        |  |
| ENSG00000127564                                  | 824.6911281                                         |         | 976.1496539 |      | 979.9804609 |      |        |  |
| 765.5807177                                      | 644.9428829                                         |         | 502.0559244 |      | 926.9404143 |      |        |  |
| 637.5265083                                      | 0.540740579                                         |         | 0.006930621 |      | 0.054390307 |      | PKMYT1 |  |
| 16                                               | 2968024                                             | 2980539 | -           | 5034 |             |      |        |  |
| protein_coding                                   | "protein kinase, membrane associated tyrosine/      |         |             |      |             |      |        |  |
| threonine 1 [Source:HGNC Symbol;Acc:HGNC:29650]" | -                                                   |         |             |      |             |      | 909    |  |
| 1103                                             | 843                                                 | 739     | 565         | 582  | 8.842587288 |      |        |  |

|                                 |                                            |                        |                    |        |
|---------------------------------|--------------------------------------------|------------------------|--------------------|--------|
| 10.38218449                     | 10.41888417                                | 8.157240576            | 6.898943636        |        |
| 5.375771389                     |                                            |                        |                    |        |
| ENSG00000106346                 | 799.288101                                 | 679.6762776            | 741.6696726        |        |
| 1081.551109                     | 1011.36176                                 | 946.3150327            | 740.2113504        |        |
| 1013.075967                     | -0.452540412                               | 0.006957539            | 0.054577339        | USP42  |
| 7                               | 6104884 6161564 +                          | 7072                   | protein_coding     |        |
| ubiquitin specific peptidase 42 | [Source:HGNC                               | Symbol;Acc:HGNC:20068] |                    |        |
| -                               | 881 768                                    | 638 1044               | 886 1097           |        |
| 6.100456574                     | 5.14571121                                 | 5.612873744            | 8.202954267        |        |
| 7.700852943                     | 7.212658894                                |                        |                    |        |
| ENSG00000104067                 | 1050.596619                                | 815.9655312            | 1112.504509        |        |
| 901.2925906                     | 514.8128145                                | 475.3141139            | 993.0222196        |        |
| 630.473173                      | 0.655413961                                | 0.006970414            | 0.054654105        | TJP1   |
| 15                              | 29699367                                   | 29968865               | - 11265            |        |
| protein_coding                  | tight junction protein 1                   | [Source:HGNC           |                    |        |
| Symbol;Acc:HGNC:11827]          | -                                          | 1158 922               | 957 870            | 451    |
| 551                             | 5.033916957                                | 3.878163957            | 5.285518391        |        |
| 4.291410902                     | 2.460892859                                | 2.274319217            |                    |        |
| ENSG00000085185                 | 254.9375214                                | 240.7186816            | 258.0731463        |        |
| 391.5960911                     | 326.4666629                                | 463.2371673            | 251.2431165        |        |
| 393.7666404                     | -0.650051393                               | 0.006978636            | 0.054694329        | BCORL1 |
| X                               | 129981107                                  | 130058083              | + 7996             |        |
| protein_coding                  | BCL6 corepressor like 1                    | [Source:HGNC           |                    |        |
| Symbol;Acc:HGNC:25657]          | -                                          | 281 272                | 222 378            | 286    |
| 537                             | 1.720926087                                | 1.611842339            | 1.727376614        |        |
| 2.626824499                     | 2.198571571                                | 3.122716215            |                    |        |
| ENSG00000185838                 | 356.5496296                                | 461.0824748            | 406.8720775        |        |
| 388.4881856                     | 687.1780806                                | 1023.089908            | 408.1680606        |        |
| 699.5853913                     | -0.778214408                               | 0.006981793            | 0.054694832        | GNB1L  |
| 22                              | 19783224                                   | 19854939               | - 6988             |        |
| protein_coding                  | G protein subunit beta 1 like              | [Source:HGNC           |                    |        |
| Symbol;Acc:HGNC:4397]           | -                                          | 393 521                | 350 375            | 602    |
| 1186                            | 2.754027913                                | 3.532736682            | 3.116176116        |        |
| 2.981881737                     | 5.2953047                                  | 7.891559055            |                    |        |
| ENSG00000185860                 | 7.258007728                                | 15.92991276            | 5.812458249        | 0      |
| 0                               | 0 9.666792911                              | 0                      | 5.708647509        |        |
| 0.006988024                     | 0.054719416                                | CCDC190 1              | 162824458          |        |
| 162868815                       | - 4316                                     | protein_coding         | coiled-coil domain |        |
| containing 190                  | [Source:HGNC                               | Symbol;Acc:HGNC:28736] | -                  | 8      |
| 18                              | 5 0                                        | 0 0                    | 0.090768934        |        |
| 0.197613909                     | 0.072076786                                | 0 0                    | 0                  |        |
| ENSG00000062822                 | 2186.474828                                | 2119.563392            | 2015.760521        |        |
| 1729.031418                     | 1608.361986                                | 1555.338199            | 2107.266247        |        |
| 1630.910534                     | 0.370027235                                | 0.006991235            | 0.054720333        | POLD1  |
| 19                              | 50384204                                   | 50418016               | + 4932             |        |
| protein_coding                  | "DNA polymerase delta 1, catalytic subunit | [Source:HGNC           |                    |        |
| Symbol;Acc:HGNC:9175]"          | -                                          | 2410 2395              |                    | 1734   |
| 1669                            | 1409 1803                                  | 23.92889578            | 23.00959055        |        |
| 21.87423491                     | 18.80378654                                | 17.56043563            | 16.99822905        |        |
| ENSG00000110427                 | 1344.545932                                | 1200.053428            | 1184.578991        |        |



|                                                              |                                                     |             |             |             |                |
|--------------------------------------------------------------|-----------------------------------------------------|-------------|-------------|-------------|----------------|
| 1050.472054                                                  | 854.9773793                                         | 810.0180635 | 1243.05945  |             |                |
| 905.1558322                                                  | 0.458184418                                         | 0.007003102 | 0.054788978 |             |                |
| KIAA1549L                                                    | 11                                                  | 33376466    | 33674102    | +           | 13012          |
| protein_coding                                               | KIAA1549 like [Source:HGNC                          |             |             |             |                |
| Symbol;Acc:HGNC:24836]                                       | -                                                   | 1482        | 1356        | 1019        | 1014           |
| 939                                                          | 5.577413359                                         | 4.937897558 | 4.872333151 |             | 749            |
| 4.330179943                                                  | 3.538222365                                         | 3.355463784 |             |             |                |
| ENSG00000117592                                              | 4109.846876                                         | 4199.302002 | 4881.302438 |             |                |
| 3345.14227                                                   | 3691.584572                                         | 3234.033781 | 4396.817105 |             |                |
| 3423.586874                                                  | 0.360897477                                         | 0.007012377 | 0.054837282 |             | PRDX6          |
| 1                                                            | 173477266                                           | 173488807   | +           | 2367        |                |
| protein_coding                                               | peroxiredoxin 6 [Source:HGNC Symbol;Acc:HGNC:16753] |             |             |             |                |
| -                                                            | 4530                                                | 4745        | 4199        | 3229        | 3234           |
| 93.71921185                                                  | 94.98704991                                         | 110.3708693 | 75.80220357 |             |                |
| 83.98256173                                                  | 73.6458367                                          |             |             |             |                |
| ENSG00000092853                                              | 1930.630056                                         | 1506.261751 | 1433.352204 |             |                |
| 1537.377246                                                  | 797.9027879                                         | 793.6279217 | 1623.41467  |             |                |
| 1042.969319                                                  | 0.638733342                                         | 0.007021973 | 0.054888063 |             | CLSPN          |
| 1                                                            | 35720218                                            | 35769967    | -           | 5411        |                |
| protein_coding                                               | claspin [Source:HGNC Symbol;Acc:HGNC:19715]         |             |             |             |                |
| 2128                                                         | 1702                                                | 1233        | 1484        | 699         | 920            |
| 14.90419289                                                  | 14.17726278                                         | 15.23941903 | 7.940484494 |             |                |
| 7.905717867                                                  |                                                     |             |             |             |                |
| ENSG00000073060                                              | 1037.895105                                         | 1140.758752 | 1053.217435 |             |                |
| 681.6672696                                                  | 868.6752812                                         | 802.2543121 | 1077.290431 |             |                |
| 784.1989543                                                  | 0.458477532                                         | 0.007049015 | 0.055075097 |             | SCARB1         |
| 12                                                           | 124776856                                           | 124882668   | -           | 7741        |                |
| protein_coding                                               | scavenger receptor class B member 1 [Source:HGNC    |             |             |             |                |
| Symbol;Acc:HGNC:1664]                                        | -                                                   | 1144        | 1289        | 906         | 658            |
| 930                                                          | 7.236984468                                         | 7.890096061 | 7.281787094 |             | 761            |
| 4.72324931                                                   | 6.042754487                                         | 5.586205386 |             |             |                |
| ENSG00000101574                                              | 309.3725794                                         | 239.8336865 | 388.2722111 |             |                |
| 221.6972579                                                  | 179.214217                                          | 83.67598739 | 312.4928257 |             |                |
| 161.5291541                                                  | 0.953976911                                         | 0.007053436 | 0.055085311 |             | METTL4         |
| 18                                                           | 2537525                                             | 2571509     | -           | 5724        | protein_coding |
| methyltransferase like 4 [Source:HGNC Symbol;Acc:HGNC:24726] | -                                                   |             |             |             |                |
| 341                                                          | 271                                                 | 334         | 214         | 157         | 97             |
| 2.243345199                                                  | 3.630393394                                         | 2.07742901  | 1.685960469 |             |                |
| 0.787958105                                                  |                                                     |             |             |             |                |
| ENSG00000111196                                              | 496.2662784                                         | 549.5819901 | 485.9215097 |             |                |
| 405.0636815                                                  | 302.4953345                                         | 308.8247782 | 510.589926  |             |                |
| 338.7945981                                                  | 0.592311466                                         | 0.007059464 | 0.055108059 |             | MAGOHB         |
| 12                                                           | 10604190                                            | 10613623    | -           | 4856        |                |
| protein_coding                                               | "mago homolog B, exon junction complex subunit      |             |             |             |                |
| [Source:HGNC Symbol;Acc:HGNC:25504]"                         | -                                                   |             | 547         | 621         | 418            |
| 391                                                          | 265                                                 | 358         | 5.51616606  | 6.059535902 |                |
| 5.355554588                                                  | 4.474145702                                         | 3.354397734 | 3.427957009 |             |                |
| ENSG00000128283                                              | 1706.539067                                         | 2026.638901 | 2213.384101 |             |                |
| 1175.824242                                                  | 1606.079002                                         | 1538.085418 | 1982.187356 |             |                |
| 1439.996221                                                  | 0.46069447                                          | 0.007077982 | 0.055190517 |             |                |

|                        |                                             |              |                           |      |             |
|------------------------|---------------------------------------------|--------------|---------------------------|------|-------------|
| CDC42EP1               | 22                                          | 37560447     | 37569405                  | +    | 2573        |
| protein_coding         | CDC42 effector protein 1                    | [Source:HGNC |                           |      |             |
| Symbol;Acc:HGNC:17014] | -                                           | 1881         | 2290                      | 1904 | 1135        |
| 1783                   | 35.79956033                                 | 42.17179988  | 46.03986107               |      | 1407        |
| 24.5114001             | 33.61256627                                 | 32.22126414  |                           |      |             |
| ENSG00000148572        | 399.190425                                  | 367.2729885  | 437.0968604               |      |             |
| 636.0846559            | 603.8491771                                 | 517.5834272  | 401.186758                |      |             |
| 585.8390867            | -0.546551633                                | 0.007078772  | 0.055190517               |      | NRBF2       |
| 10                     | 63133247                                    | 63155031     | + 1901                    |      |             |
| protein_coding         | nuclear receptor binding factor 2           | [Source:HGNC |                           |      |             |
| Symbol;Acc:HGNC:19692] | -                                           | 440          | 415                       | 376  | 614         |
| 600                    | 11.33441848                                 | 10.3440931   | 12.30587714               |      | 529         |
| 17.94726593            | 17.1049148                                  | 14.67574482  |                           |      |             |
| ENSG00000182472        | 3.629003864                                 | 17.69990306  | 8.137441549               |      | 0           |
| 0                      | 0                                           | 9.822116159  | 0                         |      |             |
| 0.007079387            | 0.055190517                                 | CAPN12       | 19                        |      |             |
| 38769904               | -                                           | 5966         | protein_coding calpain 12 |      |             |
| [Source:HGNC           | Symbol;Acc:HGNC:13249]                      | -            | 4                         |      | 20          |
| 0                      | 0                                           | 0            | 0.032832611               |      | 0.158844868 |
| 0.072999795            | 0                                           | 0            | 0                         |      |             |
| ENSG00000188786        | 899.9929583                                 | 968.1846975  | 718.4198396               |      |             |
| 1442.068145            | 1173.453599                                 | 1055.870191  | 862.1991651               |      |             |
| 1223.797312            | -0.503975886                                | 0.007097966  | 0.055301975               |      | MTF1        |
| 1                      | 37809567                                    | 37859620     | - 8024                    |      |             |
| protein_coding         | metal regulatory transcription factor 1     | [Source:HGNC |                           |      |             |
| Symbol;Acc:HGNC:7428]  | zf-C2H2                                     | 992          | 1094                      | 618  | 1392        |
| 1224                   | 6.054097846                                 | 6.460302333  | 4.791863096               |      | 1028        |
| 9.639629874            | 7.874981729                                 | 7.092862093  |                           |      |             |
| ENSG00000127483        | 4550.770845                                 | 3786.89426   | 4098.945558               |      |             |
| 3483.962048            | 3280.647514                                 | 2760.444945  | 4145.536888               |      |             |
| 3175.018169            | 0.385069738                                 | 0.007099937  | 0.055301975               |      | HP1BP3      |
| 1                      | 20742661                                    | 20787323     | - 7442                    |      |             |
| protein_coding         | heterochromatin protein 1 binding protein 3 | [Source:HGNC |                           |      |             |
| Symbol;Acc:HGNC:24973] | -                                           | 5016         |                           | 4279 | 3526        |
| 3363                   | 2874                                        | 3200         | 33.00627742               |      | 27.24451378 |
| 29.47810007            | 25.11014643                                 | 23.73801819  | 19.99361526               |      |             |
| ENSG00000182534        | 1983.250612                                 | 2354.087107  | 2612.118737               |      |             |
| 1522.873688            | 1991.90324                                  | 1593.294317  | 2316.485485               |      |             |
| 1702.690415            | 0.444195797                                 | 0.007108313  | 0.0553193                 |      | MXRA7       |
| 17                     | 76672551                                    | 76711016     | - 9257                    |      |             |
| protein_coding         | matrix remodeling associated 7              | [Source:HGNC |                           |      |             |
| Symbol;Acc:HGNC:7541]  | -                                           | 2186         | 2660                      | 2247 | 1470        |
| 1847                   | 11.56401317                                 | 13.61563228  | 15.10218045               |      | 1745        |
| 8.823870275            | 11.58704058                                 | 9.277429223  |                           |      |             |
| ENSG00000120334        | 646.8699387                                 | 558.4319416  | 567.2959251               |      |             |
| 444.4304843            | 429.2009274                                 | 300.1983878  | 590.8659352               |      |             |
| 391.2765998            | 0.596593938                                 | 0.007108416  | 0.0553193                 |      | CENPL       |
| 1                      | 173799550                                   | 173824720    | - 4914                    |      |             |
| protein_coding         | centromere protein L                        | [Source:HGNC |                           |      |             |
| Symbol;Acc:HGNC:17879] | -                                           | 713          | 631                       | 488  | 429         |
|                        |                                             |              |                           |      | 376         |

|                                            |                                              |                                      |                |        |
|--------------------------------------------|----------------------------------------------|--------------------------------------|----------------|--------|
| 348                                        | 7.105310501                                  | 6.084440492                          | 6.178620435    |        |
| 4.851032494                                | 4.703271538                                  | 3.292873977                          |                |        |
| ENSG00000228672                            | 97.98310433                                  | 120.3593408                          | 116.249165     |        |
| 169.8988332                                | 195.1951026                                  | 241.5389327                          | 111.5305367    |        |
| 202.2109562                                | -0.860175613                                 | 0.007117362                          | 0.055364561    | PROB1  |
| 5                                          | 139390592                                    | 139395713                            | - 5122         |        |
| protein_coding                             | proline rich basic protein 1                 | [Source:HGNC                         |                |        |
| Symbol;Acc:HGNC:41906]                     | -                                            | 108 136                              | 100 164        | 171    |
| 280                                        | 1.032554217                                  | 1.258130744                          | 1.21469508     |        |
| 1.779165373                                | 2.052125403                                  | 2.541847407                          |                |        |
| ENSG00000127586                            | 1165.817491                                  | 1385.017415                          | 868.3812625    |        |
| 913.7242125                                | 584.443816                                   | 779.8256969                          | 1139.738723    |        |
| 759.3312418                                | 0.586183086                                  | 0.007125912                          | 0.055382209    | CHTF18 |
| 16                                         | 788046 800737 +                              | 5916                                 | protein_coding |        |
| chromosome transmission fidelity factor 18 | [Source:HGNC                                 |                                      |                |        |
| Symbol;Acc:HGNC:18435]                     | -                                            | 1285 1565                            | 747 882        | 512    |
| 904                                        | 10.63662004                                  | 12.53466171                          | 7.855960355    |        |
| 8.284236018                                | 5.319724676                                  | 7.105117809                          |                |        |
| ENSG00000226200                            | 28.12477995                                  | 40.70977704                          | 22.08734135    |        |
| 88.05732207                                | 100.4512809                                  | 56.93417699                          | 30.30729945    |        |
| 81.81425998                                | -1.424671431                                 | 0.007125929                          | 0.055382209    | SGMS1- |
| AS1 10                                     | 50624951                                     | 50641451                             | + 12420        |        |
| antisense                                  | SGMS1 antisense RNA 1                        | [Source:HGNC                         |                |        |
| Symbol;Acc:HGNC:49683]                     | -                                            | 31 46                                | 19 85          | 88     |
| 66                                         | 0.122227459                                  | 0.175494163                          | 0.095178499    |        |
| 0.380285156                                | 0.435520334                                  | 0.247088969                          |                |        |
| ENSG00000107672                            | 803.8243559                                  | 784.1057057                          | 795.1442885    |        |
| 664.0558052                                | 539.9256347                                  | 420.9678541                          | 794.3581167    |        |
| 541.6497647                                | 0.553531106                                  | 0.007129023                          | 0.055382209    |        |
| NSMCE4A 10                                 | 121957088                                    | 121975217                            | - 3546         |        |
| protein_coding                             | "NSE4 homolog A, SMC5-SMC6 complex component | [Source:HGNC Symbol;Acc:HGNC:25935]" |                |        |
| 641                                        | 473 488                                      | 12.23555502                          | 11.83917476    | 684    |
| 12.00118739                                | 10.04456982                                  | 8.199167708                          | 6.398999981    |        |
| ENSG00000227775                            | 15.42326642                                  | 5.309970919                          | 8.137441549    | 0      |
| 0                                          | 0 9.62355963                                 | 0                                    | 5.700295705    |        |
| 0.007136721                                | 0.055417671                                  | AL031282.1                           | 1 1724512      |        |
| 1737251 +                                  | 2759                                         | transcribed_processed_pseudogene     |                |        |
| ribosomal protein S7 (RPS7) pseudogene     | -                                            | 17 6                                 |                | 7      |
| 0                                          | 0 0                                          | 0.301735149                          | 0.103044779    |        |
| 0.157853126                                | 0 0                                          | 0                                    |                |        |
| ENSG00000155876                            | 1428.01302                                   | 1723.970558                          | 1793.724616    |        |
| 1994.239353                                | 2389.142396                                  | 2194.553731                          | 1648.569398    |        |
| 2192.64516                                 | -0.411704825                                 | 0.007151004                          | 0.055504218    | RRAGA  |
| 9                                          | 19049395                                     | 19050983                             | + 1589         |        |
| protein_coding                             | Ras related GTP binding A                    | [Source:HGNC                         |                |        |
| Symbol;Acc:HGNC:16963]                     | -                                            | 1574 1948                            | 1543 1925      | 2093   |
| 2544                                       | 48.50756947                                  | 58.08867845                          | 60.41556975    |        |
| 67.31608967                                | 80.96413705                                  | 74.44306194                          |                |        |
| ENSG00000269190                            | 1013.399329                                  | 1166.423612                          | 1070.65481     |        |

|                    |                                                                                                  |             |                |        |
|--------------------|--------------------------------------------------------------------------------------------------|-------------|----------------|--------|
| 1380.946004        | 1416.591359                                                                                      | 1507.893051 | 1083.492583    |        |
| 1435.143471        | -0.405588153                                                                                     | 0.007155897 | 0.055511393    | FBX017 |
| 19                 | 38941401                                                                                         | 38975910    | - 4960         |        |
| protein_coding     | F-box protein 17 [Source:HGNC Symbol;Acc:HGNC:18754]                                             |             |                |        |
| -                  | 1117 1318                                                                                        | 921 1333    | 1241 1748      |        |
| 11.02808691        | 12.59099857                                                                                      | 11.5527347  | 14.93346253    |        |
| 15.37933175        | 16.38667234                                                                                      |             |                |        |
| ENSG00000068137    | 430.9442088                                                                                      | 397.3628238 | 631.2329659    |        |
| 325.2941074        | 315.0517446                                                                                      | 285.533524  | 486.5133328    |        |
| 308.6264587        | 0.655294055                                                                                      | 0.007160195 | 0.055511393    |        |
| PLEKHH3 17         | 42667914                                                                                         | 42676994    | - 4803         |        |
| protein_coding     | "pleckstrin homology, MyTH4 and FERM domain containing H3 [Source:HGNC Symbol;Acc:HGNC:26105]" - |             |                |        |
| 314                | 276 331                                                                                          | 4.842946892 | 4.429555986    | 543    |
| 7.033865986        | 3.632696413                                                                                      | 3.532188365 | 3.204397803    |        |
| ENSG00000137168    | 1923.372048                                                                                      | 2023.983915 | 2250.583834    |        |
| 2621.000292        | 2568.356613                                                                                      | 2794.950507 | 2065.979932    |        |
| 2661.435804        | -0.365950126                                                                                     | 0.00716181  | 0.055511393    | PPIL1  |
| 6                  | 36854827                                                                                         | 36875024    | - 1810         |        |
| protein_coding     | peptidylprolyl isomerase like 1 [Source:HGNC Symbol;Acc:HGNC:9260] -                             |             |                |        |
| 3240               | 57.35693947                                                                                      | 59.87065791 | 66.54778804    | 2250   |
| 77.67012247        | 76.4101942                                                                                       | 83.23336512 |                |        |
| ENSG00000171051    | 47.17705023                                                                                      | 20.35488852 | 53.4746159     | 0      |
| 0                  | 13.80222472                                                                                      | 40.33551822 | 4.600741575    |        |
| 3.086992308        | 0.007164481                                                                                      | 0.055511393 | FPR1 19        |        |
| 51745172           | 51804110                                                                                         | - 2594      | protein_coding | formyl |
| peptide receptor 1 | [Source:HGNC Symbol;Acc:HGNC:3826] - 52                                                          |             |                |        |
| 23                 | 46 0                                                                                             | 0 16        | 0.981662171    |        |
| 0.420130591        | 1.103302765                                                                                      | 0 0         | 0.286801243    |        |
| ENSG00000067177    | 401.9121779                                                                                      | 269.0385265 | 251.0981964    |        |
| 502.44472          | 480.5680597                                                                                      | 468.4130016 | 307.3496336    |        |
| 483.8085938        | -0.652860458                                                                                     | 0.007173049 | 0.055519231    | PHKA1  |
| X                  | 72578814                                                                                         | 72714319    | - 6350         |        |
| protein_coding     | phosphorylase kinase regulatory subunit alpha 1 [Source:HGNC Symbol;Acc:HGNC:8925] -             |             |                |        |
| 485                | 421 543                                                                                          | 3.41632111  | 2.268434789    | 216    |
| 2.116346978        | 4.244045751                                                                                      | 4.075263838 | 3.976098388    |        |
| ENSG00000196505    | 906.343715                                                                                       | 920.3949592 | 782.3568804    |        |
| 1264.917532        | 1079.851269                                                                                      | 1198.205634 | 869.6985182    |        |
| 1180.991479        | -0.44089654                                                                                      | 0.007173104 | 0.055519231    | GDAP2  |
| 1                  | 117863485                                                                                        | 117929630   | - 10496        |        |
| protein_coding     | ganglioside induced differentiation associated protein 2 [Source:HGNC Symbol;Acc:HGNC:18010] -   |             |                |        |
| 1221               | 946 1389                                                                                         | 4.660906059 | 4.695003908    | 673    |
| 3.989312785        | 6.464037772                                                                                      | 5.540062632 | 6.153319163    |        |
| ENSG00000144218    | 167.8414287                                                                                      | 123.8993214 | 170.8862725    |        |
| 71.48182615        | 92.46083808                                                                                      | 70.73640171 | 154.2090076    |        |
| 78.22635531        | 0.980305056                                                                                      | 0.007174909 | 0.055519231    | AFF3   |
| 2                  | 99545419                                                                                         | 100142739   | - 12737        |        |

|                                        |                                                   |             |                |                             |             |                |
|----------------------------------------|---------------------------------------------------|-------------|----------------|-----------------------------|-------------|----------------|
| protein_coding                         | AF4/FMR2 family member 3 [Source:HGNC             |             |                |                             |             |                |
| Symbol;Acc:HGNC:6473]                  | AF-4                                              | 185         | 140            | 147                         | 69          | 81             |
|                                        | 82                                                | 0.711267988 | 0.52081961     | 0.718053879                 |             |                |
| 0.301019053                            | 0.390899604                                       | 0.299348938 |                |                             |             |                |
| ENSG00000058056                        | 1589.503692                                       | 1417.762235 | 1478.689379    |                             |             |                |
| 1316.715957                            | 1018.210711                                       | 885.9302995 | 1495.318435    |                             |             |                |
| 1073.618989                            | 0.478482557                                       | 0.007190657 | 0.055616762    |                             |             | USP13          |
|                                        | 3                                                 | 179652755   | 179789401      | +                           | 8440        |                |
| protein_coding                         | ubiquitin specific peptidase 13 [Source:HGNC      |             |                |                             |             |                |
| Symbol;Acc:HGNC:12611]                 | -                                                 | 1752        | 1602           | 1272                        | 1271        | 892            |
|                                        | 1027                                              | 10.16530324 | 8.993867931    | 9.376732169                 |             |                |
| 8.367874297                            | 6.496355278                                       | 5.657948826 |                |                             |             |                |
| ENSG00000127804                        | 1225.696055                                       | 1224.833292 | 924.1808617    |                             |             |                |
| 1567.420333                            | 1454.260589                                       | 1574.316258 | 1124.903403    |                             |             |                |
| 1531.99906                             | -0.444758095                                      | 0.007205238 | 0.055684904    |                             |             |                |
| METTL16                                | 17                                                | 2405562     | 2511891        | -                           | 8934        | protein_coding |
| methyltransferase like 16 [Source:HGNC | Symbol;Acc:HGNC:28484]                            |             |                |                             |             | -              |
|                                        | 1351                                              | 1384        | 795            | 1513                        | 1274        | 1825           |
|                                        | 7.340346865                                       | 5.53640723  | 9.410333685    | 8.765381847                 |             |                |
|                                        | 9.498344973                                       |             |                |                             |             |                |
| ENSG00000053900                        | 678.6237226                                       | 547.8119998 | 573.1083834    |                             |             |                |
| 509.6964995                            | 325.325171                                        | 322.6270029 | 599.8480352    |                             |             |                |
| 385.8828912                            | 0.63699402                                        | 0.007207211 | 0.055684904    |                             |             | ANAPC4         |
|                                        | 4                                                 | 25377213    | 25418498       | +                           | 7494        |                |
| protein_coding                         | anaphase promoting complex subunit 4 [Source:HGNC |             |                |                             |             |                |
| Symbol;Acc:HGNC:19990]                 | -                                                 | 748         | 619            | 493                         | 492         | 285            |
|                                        | 374                                               | 4.887835628 | 3.913843006    | 4.092984285                 |             |                |
| 3.648072474                            | 2.337644852                                       | 2.32053932  |                |                             |             |                |
| ENSG00000104973                        | 1104.124426                                       | 1265.543069 | 1399.639946    |                             |             |                |
| 911.6522755                            | 918.9009217                                       | 954.0787841 | 1256.435814    |                             |             |                |
| 928.2106604                            | 0.436066554                                       | 0.007208911 | 0.055684904    |                             |             | MED25          |
|                                        | 19                                                | 49818279    | 49840383       | +                           | 7687        |                |
| protein_coding                         | mediator complex subunit 25 [Source:HGNC          |             |                |                             |             |                |
| Symbol;Acc:HGNC:28845]                 | -                                                 | 1217        | 1430           | 1204                        | 880         | 805            |
|                                        | 1106                                              | 7.752867839 | 8.814660648    | 9.744879034                 |             |                |
| 6.361182196                            | 6.437042248                                       | 6.690048466 |                |                             |             |                |
| ENSG00000095587                        | 0                                                 | 0           | 0              | 5.179842475                 | 31.96177119 |                |
|                                        | 0                                                 | 12.38053789 | -6.101002727   | 0.007240888                 |             |                |
|                                        | 0.055907492                                       | TLL2        | 10             | 96364606                    | 96513918    |                |
|                                        | -                                                 | 8151        | protein_coding | tolloid like 2 [Source:HGNC |             |                |
| Symbol;Acc:HGNC:11844]                 | -                                                 | 0           | 0              | 0                           | 5           | 28             |
|                                        | 0                                                 | 0           | 0              | 0.034085617                 | 0.211151659 |                |
|                                        | 0                                                 |             |                |                             |             |                |
| ENSG00000115461                        | 79.83808501                                       | 153.1041615 | 94.16182364    |                             |             |                |
| 360.5170362                            | 157.5258723                                       | 170.802531  | 109.03469      |                             |             |                |
| 229.6151465                            | -1.072575111                                      | 0.007254367 | 0.055970145    |                             |             | IGFBP5         |
|                                        | 2                                                 | 216672105   | 216695525      | -                           | 6442        |                |
| protein_coding                         | insulin like growth factor binding protein 5      |             |                |                             |             |                |
| [Source:HGNC                           | Symbol;Acc:HGNC:5474]                             |             |                |                             |             | -              |
|                                        | 348                                               | 138         | 198            | 0.668945344                 | 1.272482515 | 81             |

|                                   |                                                    |                        |                        |                |             |
|-----------------------------------|----------------------------------------------------|------------------------|------------------------|----------------|-------------|
| 0.782296064                       | 3.001722683                                        | 1.316757274            | 1.429142347            |                |             |
| ENSG0000007516                    | 0                                                  | 1.769990306            | 0                      | 5.179842475    |             |
| 29.67878753                       | 12.07694663                                        | 0.589996769            |                        |                |             |
| 15.64519221                       | -4.651084918                                       | 0.007255331            | 0.055970145            |                | BAIAP3      |
| 16                                | 1333601                                            | 1349441 +              | 6146                   | protein_coding | BAI1        |
| associated protein 3 [Source:HGNC | Symbol;Acc:HGNC:948]                               | -                      | 0                      |                | 0           |
| 2                                 | 0                                                  | 5                      | 26                     | 14             | 0           |
| 0                                 | 0.045205314                                        | 0.260032812            | 0.105917202            |                | 0.015419272 |
| ENSG00000116903                   | 526.2055603                                        | 484.0923488            | 488.246493             |                |             |
| 618.4731915                       | 755.6675903                                        | 754.8091646            | 499.5148007            |                |             |
| 709.6499821                       | -0.506509488                                       | 0.007265189            | 0.056009051            |                | EXOC8       |
| 1                                 | 231332753                                          | 231337852              | -                      | 5100           |             |
| protein_coding                    | exocyst complex component 8 [Source:HGNC           | Symbol;Acc:HGNC:24659] | -                      | 580            | 547         |
| 875                               | 5.56911904                                         | 5.082104502            | 5.123726753            |                | 662         |
| 6.504534158                       | 7.978755807                                        | 7.977538248            |                        |                |             |
| ENSG00000205138                   | 515.3185487                                        | 735.4309722            | 704.4699398            |                |             |
| 812.1993                          | 964.5605948                                        | 1055.870191            | 651.7398203            |                |             |
| 944.2100287                       | -0.535590514                                       | 0.007266707            | 0.056009051            |                | SDHAF1      |
| 19                                | 35995199                                           | 35996315               | +                      | 1117           |             |
| protein_coding                    | succinate dehydrogenase complex assembly factor 1  | [Source:HGNC           | Symbol;Acc:HGNC:33867] | -              | 568         |
| 784                               | 845                                                | 1224                   | 24.90140468            | 35.25123133    | 606         |
| 33.75408173                       | 39.00092731                                        | 46.49977977            | 50.95176852            |                |             |
| ENSG00000073756                   | 232.2562473                                        | 160.1841227            | 303.4103206            |                |             |
| 437.1787048                       | 399.5221399                                        | 332.9786715            | 231.9502302            |                |             |
| 389.8931721                       | -0.751723107                                       | 0.00730551             | 0.056283609            |                | PTGS2       |
| 1                                 | 186671791                                          | 186680427              | -                      | 5269           |             |
| protein_coding                    | prostaglandin-endoperoxide synthase 2 [Source:HGNC | Symbol;Acc:HGNC:9605]  | -                      | 256            | 181         |
| 386                               | 2.37925204                                         | 1.627709196            | 3.081904347            |                | 350         |
| 4.45037181                        | 4.083073577                                        | 3.406356705            |                        |                |             |
| ENSG00000285103                   | 9.07250966                                         | 15.0449176             | 4.6499666              |                | 0           |
| 0                                 | 0                                                  | 9.589131287            | 0                      | 5.697603803    |             |
| 0.007323347                       | 0.056396469                                        | AL451123.1             | 9                      | 27529085       |             |
| 27543902                          | +                                                  | 9804                   | antisense              | novel          |             |
| transcript                        | -                                                  | 10                     | 17                     | 4              | 0           |
| 0.049948837                       | 0.0821622                                          | 0.025384203            | 0                      | 0              | 0           |
| 0                                 |                                                    |                        |                        |                |             |
| ENSG00000147041                   | 116.1281236                                        | 59.29467526            | 91.83684034            |                |             |
| 49.72648776                       | 28.5372957                                         | 18.11541995            | 89.08654642            |                |             |
| 32.12640114                       | 1.475347725                                        | 0.007350093            | 0.056577803            |                | SYTL5       |
| X                                 | 38006582                                           | 38128819               | +                      | 4791           |             |
| protein_coding                    | synaptotagmin like 5 [Source:HGNC                  | Symbol;Acc:HGNC:15589] | -                      | 128            | 67          |
| 21                                | 1.308315487                                        | 0.66263607             | 1.025906466            |                | 25          |
| 0.556707549                       | 0.320745962                                        | 0.203809368            |                        |                |             |
| ENSG00000163191                   | 2931.327871                                        | 3886.898713            | 4546.504843            |                |             |
| 4335.528151                       | 5811.334897                                        | 5537.280032            | 3788.243809            |                |             |
| 5228.047693                       | -0.465031686                                       | 0.007364614            | 0.056664922            |                |             |

|                           |                                                |             |             |         |        |
|---------------------------|------------------------------------------------|-------------|-------------|---------|--------|
| S100A11 1                 | 152032506                                      | 152047907   | -           | 680     |        |
| protein_coding            | S100 calcium binding protein A11 [Source:HGNC  |             |             |         |        |
| Symbol;Acc:HGNC:10488]    | -                                              | 3231 4392   | 3911        | 4185    | 5091   |
| 6419                      | 232.6787537                                    | 306.0411742 | 357.8374166 |         |        |
| 341.9783348               | 460.1946278                                    | 438.9241544 |             |         |        |
| ENSG00000165655           | 201.4097144                                    | 203.5488852 | 240.6357715 |         |        |
| 321.1502334               | 404.0881072                                    | 307.0995001 | 215.1981237 |         |        |
| 344.1126136               | -0.677555624                                   | 0.00737058  | 0.05668617  |         | ZNF503 |
| 10                        | 75397830                                       | 75401906    | -           | 3347    |        |
| protein_coding            | zinc finger protein 503 [Source:HGNC           |             |             |         |        |
| Symbol;Acc:HGNC:23589]    | -                                              | 222 230     | 207         | 310     | 354    |
| 356                       | 3.248074228                                    | 3.256106224 | 3.847879646 |         |        |
| 5.146571671               | 6.501220706                                    | 4.945671925 |             |         |        |
| ENSG00000108298           | 22246.70094                                    | 26625.07918 | 29092.51603 |         |        |
| 30483.37296               | 34931.93293                                    | 34405.49568 | 25988.09872 |         |        |
| 33273.60052               | -0.356571086                                   | 0.007409112 | 0.056957748 |         | RPL19  |
| 17                        | 39200283                                       | 39204732    | +           | 1761    |        |
| protein_coding            | ribosomal protein L19 [Source:HGNC             |             |             |         |        |
| Symbol;Acc:HGNC:10312]    | -                                              | 24521 30085 | 25026       | 29425   | 30602  |
| 39884                     | 681.8792973                                    | 809.5004615 | 884.1764247 |         |        |
| 928.4727439               | 1068.1637                                      | 1053.101836 |             |         |        |
| ENSG00000213553           | 948.0772594                                    | 1400.947327 | 1564.713761 |         |        |
| 1441.032176               | 2159.702539                                    | 2175.575672 | 1304.579449 |         |        |
| 1925.436796               | -0.562245839                                   | 0.007434694 | 0.057129581 |         |        |
| RPLP0P6 2                 | 38481851                                       | 38482804    | +           | 954     |        |
| processed_pseudogene      | ribosomal protein lateral stalk subunit P0     |             |             |         |        |
| pseudogene 6 [Source:HGNC | Symbol;Acc:HGNC:36404]                         |             | -           |         | 1045   |
| 1583                      | 1346 1391                                      | 1892 2522   | 53.64096711 |         |        |
| 78.62469631               | 87.78160794                                    | 81.01973138 | 121.9046067 |         |        |
| 122.9214644               |                                                |             |             |         |        |
| ENSG00000114166           | 420.9644482                                    | 346.9181    | 410.3595524 |         |        |
| 335.6537923               | 175.7897415                                    | 102.6540464 | 392.7473669 |         |        |
| 204.6991934               | 0.941779881                                    | 0.007438664 | 0.057135274 |         | KAT2B  |
| 3                         | 20040023                                       | 20154404    | +           | 5634    |        |
| protein_coding            | lysine acetyltransferase 2B [Source:HGNC       |             |             |         |        |
| Symbol;Acc:HGNC:8638]     | -                                              | 464 392     | 353         | 324     | 154    |
| 119                       | 4.033014853                                    | 3.296823257 | 3.898205316 |         |        |
| 3.195510223               | 1.680162311                                    | 0.98211227  |             |         |        |
| ENSG00000197429           | 528.0200622                                    | 557.5469465 | 391.759686  |         |        |
| 717.926167                | 764.7995249                                    | 672.8584553 | 492.4422316 |         |        |
| 718.5280491               | -0.542900134                                   | 0.007449752 | 0.057195601 |         | IPP    |
| 1                         | 45694324                                       | 45750650    | -           | 3705    |        |
| protein_coding            | intracisternal A particle-promoted polypeptide |             |             |         |        |
| [Source:HGNC              | Symbol;Acc:HGNC:6108]                          |             | -           | 582 630 | 337    |
| 693                       | 670 780                                        | 7.692428281 | 8.057100447 |         |        |
| 5.659115205               | 10.39338622                                    | 11.11562663 | 9.788979263 |         |        |
| ENSG00000114107           | 361.0858845                                    | 292.0484005 | 333.6351035 |         |        |
| 203.049825                | 236.2888084                                    | 88.85182166 | 328.9231295 |         |        |
| 176.063485                | 0.90553922                                     | 0.007469287 | 0.0573207   |         | CEP70  |
| 3                         | 138494344                                      | 138594538   | -           | 4420    |        |

|                                       |                                                        |             |              |             |             |             |
|---------------------------------------|--------------------------------------------------------|-------------|--------------|-------------|-------------|-------------|
| protein_coding                        | centrosomal protein 70 [Source:HGNC                    |             |              |             |             |             |
| Symbol;Acc:HGNC:29972]                | -                                                      | 398         | 330          | 287         | 196         | 207         |
| 103                                   | 4.409501415                                            | 3.537676457 | 4.039861479  |             |             |             |
| 2.464029175                           | 2.878693561                                            | 1.083542558 |              |             |             |             |
| ENSG00000118985                       | 1707.446318                                            | 1647.860975 | 1792.562124  |             |             |             |
| 2038.785998                           | 2522.69694                                             | 2173.850394 | 1715.956472  |             |             |             |
| 2245.111111                           | -0.387736711                                           | 0.007491444 | 0.057465809  |             |             | ELL2        |
| 5                                     | 95885098                                               | 95962071    | -            | 7328        |             |             |
| protein_coding                        | elongation factor for RNA polymerase II 2 [Source:HGNC |             |              |             |             |             |
| Symbol;Acc:HGNC:17064]                | -                                                      | 1882        | 1862         | 1542        | 1968        | 2210        |
| 2520                                  | 12.57658823                                            | 12.03983837 | 13.09199286  |             |             |             |
| 14.92284668                           | 18.53762845                                            | 15.98991291 |              |             |             |             |
| ENSG00000270574                       | 0.907250966                                            | 6.194966072 | 1.16249165   |             |             |             |
| 22.79130689                           | 19.40536108                                            | 27.60444945 | 2.754902896  |             |             |             |
| 23.26703914                           | -3.052800051                                           | 0.007517664 | 0.057641942  |             |             |             |
| AC010680.2                            | 2                                                      | 178578790   | 178580906    | +           |             | 2117        |
| antisense                             | "novel transcript, antisense to titin"                 |             |              |             |             | -           |
| 1                                     | 7                                                      | 1           | 22           | 17          | 32          | 0.023131715 |
| 0.156676414                           | 0.02938908                                             | 0.57744931  | 0.49360031   |             |             |             |
| 0.702845937                           |                                                        |             |              |             |             |             |
| ENSG00000238121                       | 0.907250966                                            | 0           | 0            | 0           | 36.5277385  |             |
| 9.489029498                           | 0.302416989                                            | 15.33892267 | -5.449881581 |             |             |             |
| 0.007567996                           | 0.058002724                                            | LINC00426   | 13           |             |             |             |
| 30340270                              | 30377145                                               | -           | 3972         | lincRNA     | long        |             |
| intergenic non-protein coding RNA 426 | [Source:HGNC                                           |             |              |             |             |             |
| Symbol;Acc:HGNC:42761]                | -                                                      | 1           | 0            | 0           | 0           | 32          |
| 11                                    | 0.012328761                                            | 0           | 0            | 0           | 0.495208509 |             |
| 0.128769931                           |                                                        |             |              |             |             |             |
| ENSG00000163964                       | 800.195352                                             | 875.2602064 | 823.0440881  |             |             |             |
| 669.2356477                           | 559.3309958                                            | 571.067048  | 832.8332155  |             |             |             |
| 599.8778972                           | 0.473512003                                            | 0.007596346 | 0.058189232  |             |             | PIGX        |
| 3                                     | 196639775                                              | 196736007   | +            | 4446        |             |             |
| protein_coding                        | phosphatidylinositol glycan anchor biosynthesis class  |             |              |             |             |             |
| X [Source:HGNC                        | Symbol;Acc:HGNC:26046]                                 |             |              |             |             |             |
| 646                                   | 490                                                    | 662         | 9.714664582  | 10.54030733 |             |             |
| 9.907649766                           | 8.073746388                                            | 6.774449066 | 6.923402     |             |             |             |
| ENSG00000279425                       | 9.979760626                                            | 15.0449176  | 10.46242485  |             |             |             |
| 1.035968495                           | 0                                                      | 0           | 11.82903436  | 0.345322832 |             |             |
| 5.036455959                           | 0.00759891                                             | 0.058189232 | AC092279.2   |             |             | 19          |
| 24078481                              | 24080669                                               | +           | 2189         | TEC         |             | TEC         |
| -                                     | 11                                                     | 17          | 9            | 1           | 0           | 0           |
| 0.246079597                           | 0.367984563                                            | 0.255801799 | 0.025384364  |             |             | 0           |
| 0                                     |                                                        |             |              |             |             |             |
| ENSG00000165526                       | 867.3319235                                            | 926.5899253 | 970.6805277  |             |             |             |
| 1078.443203                           | 1295.593225                                            | 1385.398307 | 921.5341255  |             |             |             |
| 1253.144912                           | -0.444079822                                           | 0.007603814 | 0.058201588  |             |             | RPUSD4      |
| 11                                    | 126202094                                              | 126211692   | -            | 4083        |             |             |
| protein_coding                        | RNA pseudouridylate synthase domain containing 4       |             |              |             |             |             |
| [Source:HGNC                          | Symbol;Acc:HGNC:25898]                                 |             |              |             |             |             |
| 1041                                  | 1135                                                   | 1606        | 11.46587482  | 12.15048861 |             |             |



|                                    |                                          |              |                |                       |           |
|------------------------------------|------------------------------------------|--------------|----------------|-----------------------|-----------|
| 12.72371528                        | 14.16717939                              | 17.08692219  | 18.28930402    |                       |           |
| ENSG00000080493                    | 78.02358307                              | 42.47976735  | 83.69939879    |                       |           |
| 16.57549592                        | 25.11282022                              | 27.60444945  | 68.06758307    |                       |           |
| 23.09758853                        | 1.555126695                              | 0.007634107  | 0.058401837    | SLC4A4                |           |
| 4                                  | 71062667                                 | 71572087     | + 9622         |                       |           |
| protein_coding                     | solute carrier family 4 member 4         | [Source:HGNC |                |                       |           |
| Symbol;Acc:HGNC:11030]             | -                                        | 86           | 48             | 72                    | 16 22     |
| 32                                 | 0.43768512                               | 0.236375427  | 0.465558211    |                       |           |
| 0.092398873                        | 0.140541534                              | 0.154637793  |                |                       |           |
| ENSG00000180596                    | 11.79426256                              | 1.769990306  | 16.2748831     | 0                     |           |
| 0                                  | 0                                        | 9.946378654  | 0              | 5.74359995            |           |
| 0.007636579                        | 0.058401837                              | HIST1H2BC    | 6              | 26114873              |           |
| 26123926                           | -                                        | 834          | protein_coding | histone               |           |
| cluster 1 H2B family member c      | [Source:HGNC Symbol;Acc:HGNC:4757]       |              |                |                       |           |
| -                                  | 13                                       | 2            | 14             | 0                     | 0 0       |
| 0.763318846                        | 0.113629314                              | 1.044404734  | 0              | 0                     | 0         |
| ENSG00000065802                    | 1159.466735                              | 1347.847618  | 1171.791583    |                       |           |
| 1578.815986                        | 1601.513035                              | 1654.541689  | 1226.368645    |                       |           |
| 1611.62357                         | -0.393887816                             | 0.007643585  | 0.058430156    | ASB1                  |           |
| 2                                  | 238426742                                | 238452250    | + 7410         |                       |           |
| protein_coding                     | ankyrin repeat and SOCS box containing 1 | [Source:HGNC |                |                       |           |
| Symbol;Acc:HGNC:16011]             | -                                        | 1278         | 1523           | 1008                  | 1524 1403 |
| 1918                               | 8.445810433                              | 9.738860302  | 8.463483868    |                       |           |
| 11.42822554                        | 11.63822699                              | 12.0354245   |                |                       |           |
| ENSG00000259363                    | 9.07250966                               | 5.309970919  | 13.9498998     | 0                     |           |
| 0                                  | 0                                        | 9.444126792  | 0              | 5.669608539           |           |
| 0.007666092                        | 0.058559507                              | AC090825.1   | 15             | 99807023              |           |
| 99877148                           | +                                        | 1291         | lincRNA        | ubiquitin conjugating |           |
| enzyme E2 Q2 pseudogene            | [Source:NCBI gene;Acc:400464]            |              |                |                       |           |
| 6                                  | 12                                       | 0            | 0              | 0.379317117           | 10        |
| 0.220217308                        | 0.578311529                              | 0            | 0              | 0                     |           |
| ENSG00000185338                    | 29.93928188                              | 40.70977704  | 69.74949899    |                       |           |
| 16.57549592                        | 7.990442797                              | 0            | 46.7995193     | 8.188646239           |           |
| 2.527485343                        | 0.007667127                              | 0.058559507  | SOCS1          | 16                    |           |
| 11254405                           | 11256200                                 | -            | 1796           | protein_coding        |           |
| suppressor of cytokine signaling 1 | [Source:HGNC                             |              |                |                       |           |
| Symbol;Acc:HGNC:19383]             | -                                        | 33           | 46             | 60                    | 16 7      |
| 0                                  | 0.899779908                              | 1.213606629  | 2.078508308    |                       |           |
| 0.49502336                         | 0.23957366                               | 0            |                |                       |           |
| ENSG00000184967                    | 1153.115978                              | 1276.163011  | 1261.30344     |                       |           |
| 1362.298571                        | 1748.765481                              | 1923.685071  | 1230.194143    |                       |           |
| 1678.249708                        | -0.448474985                             | 0.007676588  | 0.058606457    | NOC4L                 |           |
| 12                                 | 132144448                                | 132152473    | + 2029         |                       |           |
| protein_coding                     | nucleolar complex associated 4 homolog   | [Source:HGNC |                |                       |           |
| Symbol;Acc:HGNC:28461]             | -                                        | 1271         | 1442           | 1085                  | 1315 1532 |
| 2230                               | 30.67553791                              | 33.67515894  | 33.27013306    |                       |           |
| 36.01270549                        | 46.41133688                              | 51.10387523  |                |                       |           |
| ENSG00000224184                    | 215.0184789                              | 198.2389143  | 202.2735471    |                       |           |
| 109.8126605                        | 134.6960357                              | 106.1046026  | 205.1769801    |                       |           |
| 116.8710996                        | 0.813960774                              | 0.007682562  | 0.058626762    |                       |           |

|                                     |                                            |             |                                     |              |           |
|-------------------------------------|--------------------------------------------|-------------|-------------------------------------|--------------|-----------|
| MIR3681HG                           | 2                                          | 11848622    | 12578348                            | +            | 3876      |
| lincRNA MIR3681                     | host                                       | gene        | [Source:HGNC Symbol;Acc:HGNC:52001] |              |           |
| -                                   | 237                                        | 224         | 174                                 | 106          | 118 123   |
| 2.994285872                         | 2.738360936                                | 2.793008944 | 1.51961699                          |              |           |
| 1.8713094                           | 1.475544668                                |             |                                     |              |           |
| ENSG00000163864                     | 16.33051739                                | 22.12487883 | 11.6249165                          |              |           |
| 34.18696033                         | 46.80116496                                | 91.4397388  | 16.69343757                         |              |           |
| 57.4759547                          | -1.78008411                                | 0.00770757  | 0.058792242                         |              | NMNAT3    |
| 3                                   | 139560180                                  | 139678017   | -                                   | 12983        |           |
| protein_coding                      | nicotinamide                               | nucleotide  | adenylyltransferase 3               |              |           |
| [Source:HGNC Symbol;Acc:HGNC:20989] |                                            |             |                                     | 18 25        | 10        |
| 33                                  | 41                                         | 106         | 0.067893177                         | 0.091241285  |           |
| 0.047921653                         | 0.141237794                                | 0.194113688 | 0.379631138                         |              |           |
| ENSG00000178031                     | 1362.690951                                | 1326.607735 | 1275.25334                          |              |           |
| 1016.285093                         | 1028.484137                                | 968.7436478 | 1321.517342                         |              |           |
| 1004.504293                         | 0.396177924                                | 0.007717528 | 0.058842823                         |              |           |
| ADAMTSL1                            | 9                                          | 17906563    | 18910950                            | +            | 13652     |
| protein_coding                      | ADAMTS                                     | like 1      | [Source:HGNC                        |              |           |
| Symbol;Acc:HGNC:14632]              | -                                          | 1502        | 1499                                | 1097         | 981 901   |
| 1123                                | 5.387686744                                | 5.202736058 | 4.999392042                         |              |           |
| 3.99286633                          | 4.056727831                                | 3.824850764 |                                     |              |           |
| ENSG00000164707                     | 8.165258694                                | 17.69990306 | 10.46242485                         |              |           |
| 23.82727538                         | 38.81072216                                | 84.53862644 | 12.10919554                         |              |           |
| 49.05887466                         | -2.018199966                               | 0.007725217 | 0.058876071                         |              |           |
| SLC13A4                             | 7                                          | 135681237   | 135729258                           | -            | 8015      |
| protein_coding                      | solute carrier                             | family 13   | member 4                            | [Source:HGNC |           |
| Symbol;Acc:HGNC:15827]              | -                                          | 9           | 20                                  | 9            | 23 34     |
| 98                                  | 0.054987967                                | 0.118236866 | 0.069862775                         |              |           |
| 0.159454343                         | 0.260749059                                | 0.568530237 |                                     |              |           |
| ENSG00000155252                     | 799.288101                                 | 1034.559334 | 905.5809953                         |              |           |
| 1205.867328                         | 1088.983204                                | 1593.294317 | 913.1428101                         |              |           |
| 1296.048283                         | -0.505917773                               | 0.007730229 | 0.0588889                           |              | PI4K2A    |
| 10                                  | 97640686                                   | 97676434    | +                                   | 4189         |           |
| protein_coding                      | phosphatidylinositol                       | 4-kinase    | type 2 alpha                        |              |           |
| [Source:HGNC Symbol;Acc:HGNC:30031] |                                            |             |                                     | 881          | 1169 779  |
| 1164                                | 954                                        | 1847        | 10.2989804                          | 13.22301808  |           |
| 11.57001558                         | 15.44026193                                | 13.99862483 | 20.50159043                         |              |           |
| ENSG00000065427                     | 6465.070384                                | 6454.269652 | 6954.02505                          |              |           |
| 7900.295742                         | 8425.351184                                | 8273.571083 | 6624.455028                         |              |           |
| 8199.739336                         | -0.307868002                               | 0.007734608 | 0.058896894                         |              | KARS      |
| 16                                  | 75627474                                   | 75648643    | -                                   | 4065         |           |
| protein_coding                      | lysyl-tRNA                                 | synthetase  | [Source:HGNC                        |              |           |
| Symbol;Acc:HGNC:6215]               | -                                          | 7126        | 7293                                | 5982         | 7626 7381 |
| 9591                                | 85.84479179                                | 85.01040877 | 91.55724274                         |              |           |
| 104.2433344                         | 111.6097192                                | 109.7070051 |                                     |              |           |
| ENSG00000089154                     | 5041.593618                                | 4565.689995 | 4143.12024                          |              |           |
| 5736.157556                         | 5500.84912                                 | 6294.677113 | 4583.467951                         |              |           |
| 5843.894597                         | -0.350415261                               | 0.00774883  | 0.058966808                         |              | GCN1      |
| 12                                  | 120127203                                  | 120194710   | -                                   | 9654         |           |
| protein_coding                      | "GCN1, eIF2 alpha kinase activator homolog |             |                                     |              |           |

|                                              |                                                       |             |             |             |
|----------------------------------------------|-------------------------------------------------------|-------------|-------------|-------------|
| [Source:HGNC Symbol;Acc:HGNC:4199]"          | -                                                     | 5557        | 5159        | 3564        |
| 5537                                         | 4819                                                  | 7297        | 28.18783923 | 25.32122278 |
| 22.96874401                                  | 31.8697952                                            | 30.6829415  | 35.14536596 |             |
| ENSG00000182902                              | 17.23776835                                           | 3.539980612 | 5.812458249 |             |
| 8.287747959                                  | 70.77249335                                           | 64.6979284  | 8.863402405 |             |
| 47.9193899                                   | -2.42880404                                           | 0.007750457 | 0.058966808 |             |
| SLC25A18                                     | 22                                                    | 17563439    | 17590994    | +           |
| protein_coding                               | solute carrier family 25 member 18                    |             |             | 4741        |
| [Source:HGNC Symbol;Acc:HGNC:10988]          | -                                                     | 19          | 4           | 5           |
| 8                                            | 62                                                    | 75          | 0.196251204 | 0.039977578 |
| 0.065615568                                  | 0.093763125                                           | 0.803839039 | 0.735567151 |             |
| ENSG00000136731                              | 2691.813616                                           | 2369.132025 | 2373.807949 |             |
| 2161.03028                                   | 1775.019793                                           | 1701.124197 | 2478.251197 |             |
| 1879.05809                                   | 0.399597027                                           | 0.007763741 | 0.059035685 | UGGT1       |
| 2                                            | 128091200                                             | 128195677   | +           | 11349       |
| protein_coding                               | UDP-glucose glycoprotein glucosyltransferase 1        |             |             |             |
| [Source:HGNC Symbol;Acc:HGNC:15663]          | -                                                     | 2967        | 2677        | 2042        |
| 2086                                         | 1555                                                  | 1972        | 12.80231869 | 11.17679321 |
| 11.19450742                                  | 10.21336262                                           | 8.42209542  | 8.079422747 |             |
| ENSG00000110107                              | 6895.107341                                           | 7973.80633  | 7209.773213 |             |
| 8139.604464                                  | 9967.506644                                           | 10161.88795 | 7359.562295 |             |
| 9422.999687                                  | -0.356560639                                          | 0.007766185 | 0.059035685 | PRPF19      |
| 11                                           | 60890730                                              | 60906588    | -           | 2739        |
| protein_coding                               | pre-mRNA processing factor 19 [Source:HGNC            |             |             |             |
| Symbol;Acc:HGNC:17896]                       | -                                                     | 7600        | 9010        | 6202        |
| 11780                                        | 135.8783435                                           | 155.8688028 | 140.8791025 | 7857        |
| 159.3957599                                  | 195.9607329                                           | 199.9789466 |             | 8732        |
| ENSG00000178149                              | 471.7705023                                           | 684.1012534 | 606.8206412 |             |
| 850.5301343                                  | 802.4687552                                           | 868.6775186 | 587.5641323 |             |
| 840.5588027                                  | -0.516964909                                          | 0.007776133 | 0.059085918 | DALRD3      |
| 3                                            | 49015488                                              | 49022293    | -           | 3682        |
| protein_coding                               | DALR anticodon binding domain containing 3            |             |             |             |
| [Source:HGNC Symbol;Acc:HGNC:25536]          | -                                                     | 520         | 773         | 522         |
| 821                                          | 703                                                   | 1007        | 6.915892643 | 9.947687886 |
| 8.820507335                                  | 12.39000314                                           | 11.73596758 | 12.71676672 |             |
| ENSG00000160688                              | 756.6473056                                           | 927.4749205 | 814.9066466 |             |
| 917.8680865                                  | 1359.516767                                           | 1276.705787 | 833.0096242 |             |
| 1184.69688                                   | -0.507906371                                          | 0.007837295 | 0.059525083 | FLAD1       |
| 1                                            | 154983338                                             | 154993111   | +           | 4019        |
| protein_coding                               | flavin adenine dinucleotide synthetase 1 [Source:HGNC |             |             |             |
| Symbol;Acc:HGNC:24671]                       | -                                                     | 834         | 1048        | 701         |
| 1480                                         | 10.16194238                                           | 12.35576721 | 10.85192687 | 886         |
| 12.24976506                                  | 18.21550079                                           | 17.12279777 |             | 1191        |
| ENSG00000121653                              | 633.2611743                                           | 600.0267138 | 684.7075818 |             |
| 617.437223                                   | 1288.744274                                           | 1070.535055 | 639.3318233 |             |
| 992.2388507                                  | -0.634266402                                          | 0.007846916 | 0.059572575 |             |
| MAPK8IP1                                     | 11                                                    | 45885651    | 45906465    | +           |
| protein_coding                               | mitogen-activated protein kinase 8 interacting        |             |             | 3498        |
| protein 1 [Source:HGNC Symbol;Acc:HGNC:6882] | -                                                     | 698         | 678         |             |
| 589                                          | 596                                                   | 1129        | 1241        | 9.771568954 |
|                                              |                                                       |             |             | 9.184094199 |

|                                                               |              |             |                |                       |        |
|---------------------------------------------------------------|--------------|-------------|----------------|-----------------------|--------|
|                                                               | 10.47616515  | 9.46756942  | 19.83907855    | 16.4961651            |        |
| ENSG00000241697                                               | 15.42326642  | 9.734946684 | 3.48747495     | 0                     |        |
| 0                                                             | 0            | 9.548562685 | 0              | 5.691816846           |        |
| 0.007850478                                                   | 0.059574045  | TMEFF1      | 9              | 100473113             |        |
| 100577636                                                     | +            | 2611        | protein_coding | transmembrane protein |        |
| with EGF like and two follistatin like domains 1 [Source:HGNC |              |             |                |                       |        |
| Symbol;Acc:HGNC:11866]                                        | -            | 17          | 11             | 3                     | 0      |
| 0                                                             | 0.318838482  | 0.19962377  | 0.071486038    | 0                     |        |
| 0                                                             | 0            |             |                |                       |        |
| ENSG00000229152                                               | 216.8329809  | 140.7142293 | 81.37441549    |                       |        |
| 262.1000292                                                   | 285.372957   | 284.6708849 | 146.3072086    |                       |        |
| 277.3812904                                                   | -0.918737475 | 0.007867898 | 0.059663226    |                       |        |
| ANKRD10-IT1                                                   | 13           | 110894639   | 110899172      | -                     | 800    |
| sense_intronic ANKRD10 intronic transcript 1 [Source:HGNC     |              |             |                |                       |        |
| Symbol;Acc:HGNC:39891]                                        | -            | 239         | 159            | 70                    | 253    |
| 330                                                           | 14.62973965  | 9.417455531 | 5.443959675    |                       | 250    |
| 17.57286521                                                   | 19.20867382  | 19.18028124 |                |                       |        |
| ENSG00000065978                                               | 21969.98939  | 27264.93068 | 29359.88911    |                       |        |
| 19031.77722                                                   | 21672.36385  | 20495.44108 | 26198.26973    |                       |        |
| 20399.86072                                                   | 0.360881009  | 0.007868975 | 0.059663226    |                       | YBX1   |
| 1                                                             | 42682427     | 42702349    | +              | 1930                  |        |
| protein_coding Y-box binding protein 1 [Source:HGNC           |              |             |                |                       |        |
| Symbol;Acc:HGNC:8014]                                         | CSD          | 24216       | 30808          | 25256                 | 18371  |
| 23759                                                         | 614.4319385  | 756.3671131 | 814.1681454    |                       | 18986  |
| 528.9170071                                                   | 604.6771086  | 572.4029544 |                |                       |        |
| ENSG00000137522                                               | 653.2206955  | 766.4058026 | 717.257348     |                       |        |
| 1005.925409                                                   | 945.1552337  | 953.216145  | 712.2946154    |                       |        |
| 968.0989291                                                   | -0.4426773   | 0.007882754 | 0.059742086    |                       | RNF121 |
| 11                                                            | 71928701     | 71997597    | +              | 3567                  |        |
| protein_coding ring finger protein 121 [Source:HGNC           |              |             |                |                       |        |
| Symbol;Acc:HGNC:21070]                                        | -            | 720         | 866            | 617                   | 971    |
| 1105                                                          | 9.884576585  | 11.50379737 | 10.76189874    |                       | 828    |
| 15.12614169                                                   | 14.26837739  | 14.40423462 |                |                       |        |
| ENSG00000125871                                               | 626.0031665  | 615.0716314 | 628.9079826    |                       |        |
| 466.1858227                                                   | 471.436125   | 337.2918667 | 623.3275935    |                       |        |
| 424.9712715                                                   | 0.554255659  | 0.007898209 | 0.059833583    |                       | MGME1  |
| 20                                                            | 17968913     | 17991122    | +              | 2336                  |        |
| protein_coding mitochondrial genome maintenance exonuclease 1 |              |             |                |                       |        |
| [Source:HGNC Symbol;Acc:HGNC:16205]                           | -            |             | 690            | 695                   | 541    |
| 450                                                           | 413          | 391         | 14.46455029    | 14.09738002           |        |
| 14.4089148                                                    | 10.70413848  | 10.867373   | 7.782783278    |                       |        |
| ENSG00000164587                                               | 11241.74672  | 14755.52419 | 15770.36172    |                       |        |
| 14672.42179                                                   | 21522.82842  | 20695.57334 | 13922.54421    |                       |        |
| 18963.60785                                                   | -0.445868081 | 0.00790583  | 0.05986568     |                       | RPS14  |
| 5                                                             | 150442635    | 150449756   | -              | 5099                  |        |
| protein_coding ribosomal protein S14 [Source:HGNC             |              |             |                |                       |        |
| Symbol;Acc:HGNC:10387]                                        | -            | 12391       | 16673          | 13566                 | 14163  |
| 23991                                                         | 119.0008404  | 154.937013  | 165.5288308    |                       | 18855  |
| 154.3413472                                                   | 227.294478   | 218.7733197 |                |                       |        |
| ENSG00000112081                                               | 9237.629336  | 10225.234   | 9340.620407    |                       |        |

|                                     |                                                                                |             |                |                      |
|-------------------------------------|--------------------------------------------------------------------------------|-------------|----------------|----------------------|
| 10290.27506                         | 12857.76395                                                                    | 14131.75284 | 9601.161247    |                      |
| 12426.59728                         | -0.372176114                                                                   | 0.007931854 | 0.060037043    | SRSF3                |
| 6                                   | 36594353                                                                       | 36605600    | + 7118         |                      |
| protein_coding                      | serine and arginine rich splicing factor 3                                     |             |                |                      |
| [Source:HGNC Symbol;Acc:HGNC:10785] | -                                                                              | 10182       | 11554          | 8035                 |
| 9933                                | 11264                                                                          | 16382       | 70.04929884    | 76.91318931          |
| 70.23195278                         | 77.54155312                                                                    | 97.27069487 | 107.0138419    |                      |
| ENSG00000165209                     | 539.8143248                                                                    | 507.1022227 | 531.258684     |                      |
| 439.2506418                         | 297.9293672                                                                    | 297.6104706 | 526.0584105    |                      |
| 344.9301599                         | 0.609192249                                                                    | 0.007936007 | 0.060042786    | STRBP                |
| 9                                   | 123109500                                                                      | 123268576   | - 8097         |                      |
| protein_coding                      | spermatid perinuclear RNA binding protein [Source:HGNC Symbol;Acc:HGNC:16462]  |             |                |                      |
| 345                                 | -                                                                              | 595         | 573            | 457                  |
|                                     |                                                                                |             |                | 424                  |
|                                     |                                                                                |             |                | 261                  |
| 2.909737164                         | 3.598500025                                                                    | 3.353180435 | 3.511550411    |                      |
| 2.909737164                         | 1.981361538                                                                    | 1.981189301 |                |                      |
| ENSG00000184432                     | 3642.612628                                                                    | 3578.920399 | 3926.896793    |                      |
| 3505.717387                         | 2391.42538                                                                     | 2202.317483 | 3716.143274    |                      |
| 2699.820083                         | 0.461014811                                                                    | 0.007955353 | 0.060157938    | COPB2                |
| 3                                   | 139355600                                                                      | 139389732   | - 8177         |                      |
| protein_coding                      | coatamer protein complex subunit beta 2 [Source:HGNC Symbol;Acc:HGNC:2232]     |             |                |                      |
| 2553                                | -                                                                              | 4015        | 4044           | 3378                 |
|                                     |                                                                                |             |                | 3384                 |
|                                     |                                                                                |             |                | 2095                 |
| 22.99579351                         | 24.04474831                                                                    | 23.433847   | 25.70232993    |                      |
| 22.99579351                         | 15.74843455                                                                    | 14.51736631 |                |                      |
| ENSG0000053372                      | 3357.735825                                                                    | 3871.853795 | 3437.487809    |                      |
| 4119.010736                         | 4583.08969                                                                     | 4950.685481 | 3555.692476    |                      |
| 4550.928636                         | -0.356040232                                                                   | 0.007958029 | 0.060157938    | MRT04                |
| 1                                   | 19251539                                                                       | 19260128    | + 2822         |                      |
| protein_coding                      | "MRT4 homolog, ribosome maturation factor [Source:HGNC Symbol;Acc:HGNC:18477]" |             |                |                      |
| 5739                                | -                                                                              | 3701        | 4375           | 2957                 |
|                                     |                                                                                |             |                | 3976                 |
|                                     |                                                                                |             |                | 4015                 |
| 78.28911973                         | 64.22302524                                                                    | 73.45941894 | 65.1930293     |                      |
| 78.28911973                         | 87.45323927                                                                    | 94.5606031  |                |                      |
| ENSG00000183814                     | 776.6068269                                                                    | 568.1668883 | 699.8199732    |                      |
| 590.5020421                         | 390.3902052                                                                    | 295.8851925 | 681.5312295    |                      |
| 425.59248                           | 0.680199797                                                                    | 0.007986131 | 0.060319512    | LIN9                 |
| 1                                   | 226231149                                                                      | 226309869   | - 4442         |                      |
| protein_coding                      | lin-9 DREAM MuvB core complex component [Source:HGNC Symbol;Acc:HGNC:30830]    |             |                |                      |
| 343                                 | -                                                                              | 856         | 642            | 602                  |
|                                     |                                                                                |             |                | 570                  |
|                                     |                                                                                |             |                | 342                  |
| 7.130308905                         | 9.436781381                                                                    | 6.848302171 | 8.431887115    |                      |
| 7.130308905                         | 4.732546742                                                                    | 3.590430992 |                |                      |
| ENSG00000149295                     | 9.979760626                                                                    | 15.0449176  | 3.48747495     | 0                    |
| 0                                   | 0                                                                              | 9.504051059 | 0              | 5.685341021          |
| 0.007986223                         | 0.060319512                                                                    | DRD2        | 11             | 113409615            |
| 113475691                           | -                                                                              | 4098        | protein_coding | dopamine receptor D2 |
| [Source:HGNC Symbol;Acc:HGNC:3023]  | -                                                                              |             |                |                      |
| 0                                   | 0                                                                              | 0           | 0.131446617    | 0.196563741          |
| 0.045546619                         | 0                                                                              | 0           | 0              |                      |
| ENSG00000271751                     | 17.23776835                                                                    | 7.964956378 | 3.48747495     | 0                    |
| 0                                   | 0                                                                              | 9.563399894 | 0              | 5.693939793          |
| 0.007999827                         | 0.060396472                                                                    | AP003392.5  | 11             | 119065263            |
| 119065677                           | -                                                                              | 415         | lincRNA        | novel transcript     |

|                                                 |                                                         |           |             |             |             |             |        |
|-------------------------------------------------|---------------------------------------------------------|-----------|-------------|-------------|-------------|-------------|--------|
| -                                               | 19                                                      | 9         | 3           | 0           | 0           | 0           |        |
| 2.241992667                                     | 1.027592329                                             |           | 0.449759147 |             | 0           | 0           | 0      |
| ENSG00000135362                                 | 212.296726                                              |           | 153.9891566 |             | 265.0480962 |             |        |
| 44.54664528                                     | 116.4321665                                             |           | 133.709052  |             | 210.4446596 |             |        |
| 98.22928792                                     | 1.096142075                                             |           | 0.008013705 |             | 0.060464177 |             | PRR5L  |
| 11                                              | 36296288                                                |           | 36465204    |             | +           | 6616        |        |
| protein_coding                                  | proline rich 5 like [Source:HGNC                        |           |             |             |             |             |        |
| Symbol;Acc:HGNC:25878]                          | -                                                       |           | 234         | 174         | 228         | 43          | 102    |
| 155                                             | 1.732004613                                             |           | 1.246178323 |             | 2.144105728 |             |        |
| 0.361147824                                     | 0.947658878                                             |           | 1.089349453 |             |             |             |        |
| ENSG00000148926                                 | 2404.21506                                              |           | 2649.675488 |             | 3243.351703 |             |        |
| 3181.459248                                     | 3795.460329                                             |           | 4108.749773 |             | 2765.747417 |             |        |
| 3695.223116                                     | -0.418546756                                            |           | 0.008015631 |             | 0.060464177 |             | ADM    |
| 11                                              | 10304680                                                |           | 10307397    |             | +           | 2718        |        |
| protein_coding                                  | adrenomedullin [Source:HGNC Symbol;Acc:HGNC:259]        |           |             |             |             |             |        |
| -                                               | 2650                                                    | 2994      | 2790        | 3071        | 3325        | 4763        |        |
| 47.74469299                                     | 52.19498588                                             |           | 63.86480603 |             | 62.78304968 |             |        |
| 75.19510281                                     | 81.4820876                                              |           |             |             |             |             |        |
| ENSG00000240024                                 | 96.16860239                                             |           | 122.1293311 |             | 92.99933199 |             |        |
| 68.37392066                                     | 19.40536108                                             |           | 30.19236658 |             | 103.7657552 |             |        |
| 39.32388278                                     | 1.399901984                                             |           | 0.00803018  |             | 0.06054528  |             |        |
| LINC00888                                       | 3                                                       | 183447608 | 183456013   |             | +           | 2131        |        |
| protein_coding                                  | transcribed_unprocessed_pseudogene long intergenic non- |           |             |             |             |             |        |
| RNA 888 [Source:HGNC Symbol;Acc:HGNC:48575]     | -                                                       |           |             |             |             |             | -      |
| 106                                             | 138                                                     | 80        | 66          | 17          | 35          | 2.435853131 |        |
| 3.068471384                                     | 2.335680225                                             |           | 1.720966948 |             | 0.490357511 |             |        |
| 0.763687378                                     |                                                         |           |             |             |             |             |        |
| ENSG00000110719                                 | 1082.350402                                             |           | 1207.133389 |             | 941.6182364 |             |        |
| 697.2067971                                     | 828.7230673                                             |           | 816.0565368 |             | 1077.034009 |             |        |
| 780.6621337                                     | 0.46495635                                              |           | 0.008033228 |             | 0.06054528  |             | TCIRG1 |
| 11                                              | 68039016                                                |           | 68050895    |             | +           | 4384        |        |
| protein_coding                                  | "T cell immune regulator 1, ATPase H+ transporting V0   |           |             |             |             |             |        |
| subunit a3 [Source:HGNC Symbol;Acc:HGNC:11647]" | -                                                       |           |             |             |             | 1193        | 1364   |
| 810                                             | 673                                                     | 726       | 946         | 13.32596234 | 14.74247044 |             |        |
| 11.49532674                                     | 8.530147922                                             |           | 10.17919503 |             | 10.03348046 |             |        |
| ENSG00000134780                                 | 397.3759231                                             |           | 538.0770531 |             | 452.2092518 |             |        |
| 206.1577305                                     | 349.2964994                                             |           | 308.8247782 |             | 462.554076  |             |        |
| 288.0930027                                     | 0.683621515                                             |           | 0.008060202 |             | 0.060722703 |             | DAGLA  |
| 11                                              | 61680433                                                |           | 61747001    |             | +           | 5757        |        |
| protein_coding                                  | diacylglycerol lipase alpha [Source:HGNC                |           |             |             |             |             |        |
| Symbol;Acc:HGNC:1165]                           | -                                                       |           | 438         | 608         | 389         | 199         | 306    |
| 358                                             | 3.7256887                                               |           | 5.004189999 |             | 4.203975908 |             |        |
| 1.92074137                                      | 3.267176203                                             |           | 2.891464172 |             |             |             |        |
| ENSG00000117448                                 | 1263.800596                                             |           | 1448.737066 |             | 1440.327154 |             |        |
| 1781.865811                                     | 2048.977832                                             |           | 1666.618635 |             | 1384.288272 |             |        |
| 1832.487426                                     | -0.404407145                                            |           | 0.008079931 |             | 0.060845425 |             | AKR1A1 |
| 1                                               | 45550543                                                |           | 45570049    |             | +           | 3121        |        |
| protein_coding                                  | aldo-keto reductase family 1 member A1 [Source:HGNC     |           |             |             |             |             |        |
| Symbol;Acc:HGNC:380]                            | -                                                       |           | 1393        | 1637        | 1239        | 1720        | 1795   |
| 1932                                            | 21.85677247                                             |           | 24.85314488 |             | 24.69928517 |             |        |

|                                                            |                                                     |             |             |            |      |             |  |
|------------------------------------------------------------|-----------------------------------------------------|-------------|-------------|------------|------|-------------|--|
| 30.62292861                                                | 35.35233016                                         | 28.78355101 |             |            |      |             |  |
| ENSG00000104946                                            | 1089.60841                                          | 1208.903379 | 1121.804442 |            |      |             |  |
| 1290.816745                                                | 1634.616298                                         | 1687.321973 | 1140.10541  |            |      |             |  |
| 1537.585005                                                | -0.431549676                                        | 0.008087389 | 0.060873118 |            |      |             |  |
| TBC1D17 19                                                 | 49877425                                            | 49888749    | +           | 4745       |      |             |  |
| protein_coding                                             | TBC1 domain family member 17 [Source:HGNC           |             |             |            |      |             |  |
| Symbol;Acc:HGNC:25699]                                     | -                                                   | 1201        | 1366        | 965        | 1246 | 1432        |  |
| 1956                                                       | 12.39468443                                         | 13.64083399 | 12.65312922 |            |      |             |  |
| 14.59129605                                                | 18.5504377                                          | 19.16741967 |             |            |      |             |  |
| ENSG00000188021                                            | 1890.711013                                         | 1932.829414 | 2135.497161 |            |      |             |  |
| 2581.633489                                                | 2875.417915                                         | 2309.284724 | 1986.345863 |            |      |             |  |
| 2588.77871                                                 | -0.382093852                                        | 0.008092947 | 0.060873118 |            |      | UBQLN2      |  |
| X                                                          | 56563639                                            | 56567868    | +           | 4230       |      |             |  |
| protein_coding                                             | ubiquilin 2 [Source:HGNC Symbol;Acc:HGNC:12509] -   |             |             |            |      |             |  |
| 2084                                                       | 2184                                                | 1837        | 2492        | 2519       | 2677 | 24.12603929 |  |
| 24.46463313                                                | 27.01939594                                         | 32.73555544 | 36.60455743 |            |      |             |  |
| 29.42652791                                                |                                                     |             |             |            |      |             |  |
| ENSG00000064102                                            | 1105.031677                                         | 807.1155796 | 899.768537  |            |      |             |  |
| 661.9838682                                                | 627.8205055                                         | 710.8145733 | 937.3052644 |            |      |             |  |
| 666.8729823                                                | 0.490745916                                         | 0.008093933 | 0.060873118 |            |      | INTS13      |  |
| 12                                                         | 26905181                                            | 26938326    | -           | 3345       |      |             |  |
| protein_coding                                             | integrator complex subunit 13 [Source:HGNC          |             |             |            |      |             |  |
| Symbol;Acc:HGNC:20174]                                     | -                                                   | 1218        | 912         | 774        | 639  | 550         |  |
| 824                                                        | 17.83117038                                         | 12.91888871 | 14.39632642 |            |      |             |  |
| 10.61492133                                                | 10.10680596                                         | 11.45413    |             |            |      |             |  |
| ENSG00000225190                                            | 740.3167882                                         | 929.2449108 | 875.3562124 |            |      |             |  |
| 936.5155194                                                | 1245.367585                                         | 1463.035821 | 848.3059705 |            |      |             |  |
| 1214.972975                                                | -0.518862315                                        | 0.008102012 | 0.060907986 |            |      |             |  |
| PLEKHM1 17                                                 | 45435900                                            | 45490749    | -           | 9233       |      |             |  |
| protein_coding                                             | pleckstrin homology and RUN domain containing M1    |             |             |            |      |             |  |
| [Source:HGNC Symbol;Acc:HGNC:29017]                        | -                                                   |             | 816         | 1050       | 753  |             |  |
| 904                                                        | 1091                                                | 1696        | 4.327887935 | 5.38856225 |      |             |  |
| 5.074099594                                                | 5.440485267                                         | 7.263221275 | 8.541104402 |            |      |             |  |
| ENSG00000128245                                            | 1686.579546                                         | 1781.495243 | 1929.736139 |            |      |             |  |
| 1263.881564                                                | 1572.975739                                         | 1177.502297 | 1799.270309 |            |      |             |  |
| 1338.119867                                                | 0.427685148                                         | 0.008116388 | 0.060985001 |            |      | YWHAH       |  |
| 22                                                         | 31944461                                            | 31957603    | +           | 2453       |      |             |  |
| protein_coding                                             | tyrosine 3-monooxygenase/tryptophan 5-monooxygenase |             |             |            |      |             |  |
| activation protein eta [Source:HGNC Symbol;Acc:HGNC:12853] | -                                                   |             |             |            |      |             |  |
| 1859                                                       | 2013                                                | 1660        | 1220        | 1378       | 1365 | 37.11167234 |  |
| 38.88415517                                                | 42.10342117                                         | 27.63594541 | 34.53019489 |            |      |             |  |
| 25.87415177                                                |                                                     |             |             |            |      |             |  |
| ENSG00000138442                                            | 1637.587994                                         | 1741.670461 | 1469.389445 |            |      |             |  |
| 2001.491132                                                | 2201.937737                                         | 2094.487602 | 1616.215967 |            |      |             |  |
| 2099.30549                                                 | -0.376701307                                        | 0.008122295 | 0.060985001 |            |      | WDR12       |  |
| 2                                                          | 202874782                                           | 203014798   | -           | 9098       |      |             |  |
| protein_coding                                             | WD repeat domain 12 [Source:HGNC                    |             |             |            |      |             |  |
| Symbol;Acc:HGNC:14098]                                     | -                                                   | 1805        | 1968        | 1264       | 1932 | 1929        |  |
| 2428                                                       | 9.715383699                                         | 10.24956898 | 8.643865251 |            |      |             |  |
| 11.79976161                                                | 13.0326777                                          | 12.40891381 |             |            |      |             |  |

|                                                                 |                                                      |                  |                   |        |
|-----------------------------------------------------------------|------------------------------------------------------|------------------|-------------------|--------|
| ENSG00000174799                                                 | 738.5022863                                          | 470.8174215      | 444.0718103       |        |
| 418.5312719                                                     | 287.6559407                                          | 325.2149201      | 551.130506        |        |
| 343.8007109                                                     | 0.681452475                                          | 0.008122599      | 0.060985001       | CEP135 |
| 4                                                               | 55948871                                             | 56033363         | + 8640            |        |
| protein_coding                                                  | centrosomal protein 135 [Source:HGNC                 |                  |                   |        |
| Symbol;Acc:HGNC:29086]                                          | -                                                    | 814 532          | 382 404           | 252    |
| 377                                                             | 4.613593706                                          | 2.917590463      | 2.750783857       |        |
| 2.598242404                                                     | 1.792809556                                          | 2.02889058       |                   |        |
| ENSG00000186318                                                 | 2238.188133                                          | 2177.973072      | 2195.946727       |        |
| 1691.736552                                                     | 1684.841938                                          | 1805.503522      | 2204.035977       |        |
| 1727.360671                                                     | 0.351361819                                          | 0.008135876      | 0.061058767       | BACE1  |
| 11                                                              | 117285207                                            | 117316259        | - 7190            |        |
| protein_coding                                                  | beta-secretase 1 [Source:HGNC Symbol;Acc:HGNC:933]   |                  |                   |        |
| -                                                               | 2467 2461                                            | 1889 1633        | 1476 2093         |        |
| 16.80230805                                                     | 16.2184432                                           | 16.34594052      | 12.6202901        |        |
| 12.6184156                                                      | 13.53540815                                          |                  |                   |        |
| ENSG00000155438                                                 | 1694.744804                                          | 1793.885175      | 1263.628423       |        |
| 2163.102217                                                     | 1987.337273                                          | 2289.444026      | 1584.086134       |        |
| 2146.627839                                                     | -0.437808953                                         | 0.008170289      | 0.061291027       | NIFK   |
| 2                                                               | 121726945                                            | 121736923        | - 2447            |        |
| protein_coding                                                  | nucleolar protein interacting with the FHA domain of |                  |                   |        |
| MKI67 [Source:HGNC Symbol;Acc:HGNC:17838]                       | -                                                    |                  | 1868 2027         |        |
| 1087                                                            | 2088 1741                                            | 2654 37.38277924 | 39.25059279       |        |
| 27.63773328                                                     | 47.41421543                                          | 43.73329121      | 50.43104499       |        |
| ENSG00000163214                                                 | 771.1633211                                          | 615.0716314      | 639.3704074       |        |
| 927.1918029                                                     | 991.9563987                                          | 883.3423824      | 675.2017866       |        |
| 934.163528                                                      | -0.467629769                                         | 0.008182213      | 0.061354455       | DHX57  |
| 2                                                               | 38797729                                             | 38875934         | - 7985            |        |
| protein_coding                                                  | DEXH-box helicase 57 [Source:HGNC                    |                  |                   |        |
| Symbol;Acc:HGNC:20086]                                          | -                                                    | 850 695          | 550 895           | 869    |
| 1024                                                            | 5.212819519                                          | 4.124167779      | 4.285432073       |        |
| 6.228165701                                                     | 6.68947779                                           | 5.962879792      |                   |        |
| ENSG00000115568                                                 | 695.8614909                                          | 773.4857638      | 718.4198396       |        |
| 934.4435824                                                     | 922.3253972                                          | 1155.936321      | 729.2556981       |        |
| 1004.2351                                                       | -0.462211925                                         | 0.008186443      | 0.061360165       | ZNF142 |
| 2                                                               | 218637916                                            | 218659655        | - 6994            |        |
| protein_coding                                                  | zinc finger protein 142 [Source:HGNC                 |                  |                   |        |
| Symbol;Acc:HGNC:12927]                                          | zf-C2H2                                              | 767 874          | 618 902           | 808    |
| 1340                                                            | 5.37029842                                           | 5.92123429       | 5.497556402       |        |
| 7.166266475                                                     | 7.101222051                                          | 8.908614957      |                   |        |
| ENSG00000103152                                                 | 687.6962322                                          | 824.8154827      | 1252.003507       |        |
| 587.3941366                                                     | 642.6598993                                          | 602.1220536      | 921.505074        |        |
| 610.7253632                                                     | 0.592276281                                          | 0.008211701      | 0.061523414       | MPG    |
| 16                                                              | 77007 85853                                          | + 1661           | protein_coding N- |        |
| methylpurine DNA glycosylase [Source:HGNC Symbol;Acc:HGNC:7211] | -                                                    |                  |                   |        |
| 758                                                             | 932 1077                                             | 567 563          | 698 22.34746453   |        |
| 26.58720724                                                     | 40.34158129                                          | 18.96817161      | 20.83464585       |        |
| 19.53965126                                                     |                                                      |                  |                   |        |
| ENSG00000077463                                                 | 511.6895448                                          | 831.8954439      | 512.6588176       |        |
| 718.9621355                                                     | 948.5797092                                          | 1239.612308      | 618.7479354       |        |



|                                                                                          |                 |             |                  |             |
|------------------------------------------------------------------------------------------|-----------------|-------------|------------------|-------------|
| 969.0513842                                                                              | -0.646891388    | 0.008226407 | 0.061607499      | SIRT6       |
| 19                                                                                       | 4174109 4182604 | - 2787      | protein_coding   |             |
| sirtuin 6 [Source:HGNC Symbol;Acc:HGNC:14934]                                            |                 | -           | 564              | 940         |
| 441                                                                                      | 694 831         | 1437        | 9.909935294      | 15.98149215 |
|                                                                                          | 9.844835581     | 13.83676437 | 18.3278455       | 23.9745695  |
| ENSG00000146373                                                                          | 264.0100311     | 261.0735702 | 182.511189       |             |
| 317.0063594                                                                              | 420.0689928     | 401.9897951 | 235.8649301      |             |
| 379.6883824                                                                              | -0.684361298    | 0.00824078  | 0.061689018      | RNF217      |
| 6                                                                                        | 124962545       | 125092633   | +                | 12779       |
| protein_coding ring finger protein 217 [Source:HGNC Symbol;Acc:HGNC:21487]               | -               | 291 295     | 157 306          | 368         |
| 466                                                                                      | 1.11512821      | 1.093834423 | 0.764380552      |             |
| 1.330566546                                                                              | 1.770102065     | 1.695586947 |                  |             |
| ENSG00000109654                                                                          | 339.3118613     | 202.6638901 | 312.7102538      |             |
| 222.7332264                                                                              | 105.0172482     | 125.9453006 | 284.8953351      |             |
| 151.2319251                                                                              | 0.912947907     | 0.008244964 | 0.061694235      | TRIM2       |
| 4                                                                                        | 153152342       | 153339320   | +                | 9425        |
| protein_coding tripartite motif containing 2 [Source:HGNC Symbol;Acc:HGNC:15974]         | -               | 374 229     | 269 215          | 92          |
| 146                                                                                      | 1.943206376     | 1.151278951 | 1.775733417      |             |
| 1.267561806                                                                              | 0.600003562     | 0.720281922 |                  |             |
| ENSG00000143933                                                                          | 7529.275767     | 7829.55212  | 8479.214094      |             |
| 6602.227218                                                                              | 6354.685007     | 6251.545161 | 7946.013994      |             |
| 6402.819129                                                                              | 0.311443279     | 0.008258285 | 0.061713334      | CALM2       |
| 2                                                                                        | 47160082        | 47176601    | -                | 6466        |
| protein_coding calmodulin 2 [Source:HGNC Symbol;Acc:HGNC:1445]                           | -               |             |                  |             |
| 8299                                                                                     | 8847 7294       | 6373 5567   | 7247 62.85194877 |             |
|                                                                                          | 64.83160418     | 70.18380429 | 54.76716518      | 52.92158968 |
|                                                                                          | 52.11390047     |             |                  |             |
| ENSG00000185825                                                                          | 4958.126529     | 6290.545548 | 6271.642451      |             |
| 6580.47188                                                                               | 8404.804331     | 7927.652826 | 5840.104843      |             |
| 7637.643012                                                                              | -0.387207999    | 0.008258471 | 0.061713334      | BCAP31      |
| X                                                                                        | 153700492       | 153724746   | -                | 3533        |
| protein_coding B cell receptor associated protein 31 [Source:HGNC Symbol;Acc:HGNC:16695] | -               | 5465 7108   | 5395 6352        | 7363        |
| 9190                                                                                     | 75.74870498     | 95.33013818 | 95.00679293      |             |
| 99.90308413                                                                              | 128.1027707     | 120.9491699 |                  |             |
| ENSG00000150281                                                                          | 57.15681086     | 73.45459771 | 67.42451569      |             |
| 123.2802509                                                                              | 134.6960357     | 137.1596082 | 66.01197475      |             |
| 131.7119649                                                                              | -0.99695934     | 0.008265894 | 0.061713334      | CTF1        |
| 16                                                                                       | 30896607        | 30903560    | +                | 1664        |
| protein_coding cardiotrophin 1 [Source:HGNC Symbol;Acc:HGNC:2499]                        | -               |             |                  |             |
|                                                                                          | 63 83           | 58 119      | 118 159          |             |
| 1.854026388                                                                              | 2.36347608      | 2.16861031  | 3.973797051      |             |
| 4.358891367                                                                              | 4.442984729     |             |                  |             |
| ENSG00000169220                                                                          | 320.259591      | 376.1229401 | 241.7982632      |             |
| 511.7684365                                                                              | 369.8433523     | 640.0781716 | 312.7269314      |             |
| 507.2299868                                                                              | -0.697272798    | 0.008269595 | 0.061713334      | RGS14       |
| 5                                                                                        | 177357837       | 177372601   | +                | 3797        |
| protein_coding regulator of G protein signaling 14 [Source:HGNC                          |                 |             |                  |             |

|                                                 |                 |                        |             |     |     |                |
|-------------------------------------------------|-----------------|------------------------|-------------|-----|-----|----------------|
| Symbol;Acc:HGNC:9996]                           | -               | 353                    | 425         | 208 | 494 | 324            |
| 742                                             | 4.55263457      | 5.303648992            | 3.408235411 |     |     |                |
| 7.229335757                                     | 5.245075853     | 9.086451781            |             |     |     |                |
| ENSG00000139178                                 | 104.3338611     | 149.5641809            | 146.4739479 |     |     |                |
| 203.049825                                      | 256.8356613     | 238.0883765            | 133.45733   |     |     |                |
| 232.6579543                                     | -0.802775936    | 0.008270506            | 0.061713334 |     |     | C1RL           |
| 12                                              | 7089587 7109273 | -                      | 5014        |     |     | protein_coding |
| complement C1r subcomponent like                | [Source:HGNC    | Symbol;Acc:HGNC:21265] |             |     |     |                |
| -                                               | 115 169         | 126 196                | 225 276     |     |     |                |
| 1.123161464                                     | 1.597087887     | 1.563482635            | 2.172119855 |     |     |                |
| 2.758325718                                     | 2.559503752     |                        |             |     |     |                |
| ENSG00000149474                                 | 412.7991895     | 441.6125814            | 401.0596192 |     |     |                |
| 474.4735707                                     | 652.9333257     | 757.3970818            | 418.4904634 |     |     |                |
| 628.2679927                                     | -0.58649763     | 0.008270741            | 0.061713334 |     |     | KAT14          |
| 20                                              | 18138118        | 18188387               | + 4251      |     |     |                |
| protein_coding lysine acetyltransferase 14      | [Source:HGNC    |                        |             |     |     |                |
| Symbol;Acc:HGNC:15904]                          | -               | 455 499                | 345 458     |     |     | 572            |
| 878                                             | 5.241420165     | 5.562062716            | 5.049342576 |     |     |                |
| 5.986685126                                     | 8.270890745     | 9.603608096            |             |     |     |                |
| ENSG00000006634                                 | 1017.935584     | 879.6851822            | 903.256012  |     |     |                |
| 793.5518671                                     | 632.3864728     | 536.5614862            | 933.6255927 |     |     |                |
| 654.1666087                                     | 0.514063213     | 0.0082741              | 0.061713334 |     |     | DBF4           |
| 7                                               | 87876216        | 87909541               | + 4583      |     |     |                |
| protein_coding DBF4 zinc finger                 | [Source:HGNC    | Symbol;Acc:HGNC:17364] |             |     |     |                |
| -                                               | 1122 994        | 777 766                | 554 622     |     |     |                |
| 11.9886887                                      | 10.27691981     | 10.54819156            | 9.287331684 |     |     |                |
| 7.43031572                                      | 6.310612968     |                        |             |     |     |                |
| ENSG00000171217                                 | 0 0             | 1.16249165             | 5.179842475 |     |     |                |
| 26.25431205                                     | 5.175834272     | 0.387497217            |             |     |     |                |
| 12.2033296                                      | -5.118227314    | 0.008276759            | 0.061713334 |     |     | CLDN20         |
| 6                                               | 155264013       | 155276548              | + 1209      |     |     |                |
| protein_coding claudin 20                       | [Source:HGNC    | Symbol;Acc:HGNC:2042]  |             |     |     |                |
| 0                                               | 0 1             | 5 23                   | 6 0         |     |     | 0              |
| 0.051461275                                     | 0.229803028     | 1.169361781            | 0.230757576 |     |     |                |
| ENSG00000127946                                 | 623.2814136     | 479.667373             | 601.008183  |     |     |                |
| 363.6249417                                     | 441.7573375     | 341.6050619            | 567.9856565 |     |     |                |
| 382.3291137                                     | 0.571856719     | 0.008281518            | 0.061713334 |     |     | HIP1           |
| 7                                               | 75533300        | 75738962               | - 8953      |     |     |                |
| protein_coding huntingtin interacting protein 1 | [Source:HGNC    |                        |             |     |     |                |
| Symbol;Acc:HGNC:4913]                           | -               | 687 542                | 517 351     |     |     | 387            |
| 396                                             | 3.757654414     | 2.868515117            | 3.59276495  |     |     |                |
| 2.178464944                                     | 2.656988904     | 2.056636881            |             |     |     |                |
| ENSG00000175283                                 | 246.7722627     | 373.4679546            | 338.2850701 |     |     |                |
| 409.2075555                                     | 519.3787818     | 566.7538527            | 319.5084292 |     |     |                |
| 498.44673                                       | -0.642418178    | 0.008282405            | 0.061713334 |     |     | DOLK           |
| 9                                               | 128945530       | 128947619              | - 2090      |     |     |                |
| protein_coding dolichol kinase                  | [Source:HGNC    | Symbol;Acc:HGNC:23406] |             |     |     |                |
| -                                               | 272 422         | 291 395                | 455 657     |     |     |                |
| 6.373108342                                     | 9.56737079      | 8.662705485            | 10.50177848 |     |     |                |
| 13.3817364                                      | 14.61672585     |                        |             |     |     |                |

|                                                |                                                  |                 |              |       |
|------------------------------------------------|--------------------------------------------------|-----------------|--------------|-------|
| ENSG00000154380                                | 1495.149592                                      | 1133.678791     | 1319.428023  |       |
| 1080.51514                                     | 945.1552337                                      | 833.3093177     | 1316.085469  |       |
| 952.9932305                                    | 0.46612299                                       | 0.008301731     | 0.061827238  | ENAH  |
| 1                                              | 225486835                                        | 225653142       | - 15044      |       |
| protein_coding                                 | "ENAH, actin regulator [Source:HGNC              |                 |              |       |
| Symbol;Acc:HGNC:18271]"                        | -                                                | 1648 1281       | 1135 1043    | 828   |
| 966                                            | 5.364417445                                      | 4.034709267     | 4.693959989  |       |
| 3.852414664                                    | 3.383096394                                      | 2.98569073      |              |       |
| ENSG00000212719                                | 751.2037998                                      | 934.5548817     | 832.3440213  |       |
| 1010.069283                                    | 1260.206978                                      | 1186.991326     | 839.3675676  |       |
| 1152.422529                                    | -0.457083171                                     | 0.008304682     | 0.061827238  |       |
| C17orf51                                       | 17 21428381                                      | 21574517        | -            | 14794 |
| protein_coding                                 | chromosome 17 open reading frame 51              |                 |              |       |
| [Source:HGNC Symbol;Acc:HGNC:27904]"           | -                                                | 828 1056        |              | 716   |
| 975                                            | 1104 1376                                        | 2.740775137     | 3.382242517  |       |
| 3.011162925                                    | 3.662107131                                      | 4.587021959     | 4.324778185  |       |
| ENSG00000162976                                | 166.0269268                                      | 200.0089046     | 169.7237809  |       |
| 307.682643                                     | 294.5048917                                      | 263.9675479     | 178.5865374  |       |
| 288.7183608                                    | -0.691640351                                     | 0.008316476     | 0.061867254  | PQLC3 |
| 2                                              | 11155198                                         | 11178874        | + 2275       |       |
| protein_coding                                 | PQ loop repeat containing 3 [Source:HGNC         |                 |              |       |
| Symbol;Acc:HGNC:28503]"                        | -                                                | 183 226         | 146 297      | 258   |
| 306                                            | 3.939112391                                      | 4.707100587     | 3.992806845  |       |
| 7.25415936                                     | 6.970848837                                      | 6.254189608     |              |       |
| ENSG0000007062                                 | 0.907250966                                      | 0 0             | 12.43162194  |       |
| 21.68834474                                    | 2.587917136                                      | 0.302416989     |              |       |
| 12.23596127                                    | -5.122173847                                     | 0.008317052     | 0.061867254  | PROM1 |
| 4                                              | 15963076                                         | 16084378        | - 7434       |       |
| protein_coding                                 | prominin 1 [Source:HGNC Symbol;Acc:HGNC:9454]"   |                 |              |       |
| 1                                              | 0 0                                              | 12 19           | 3 0.00658728 |       |
| 0                                              | 0 0.089695516                                    | 0.157100803     | 0.018764185  |       |
| ENSG00000170222                                | 162.3979229                                      | 144.25421       | 183.6736807  |       |
| 199.9419195                                    | 288.7974325                                      | 364.0336771     | 163.4419379  |       |
| 284.2576764                                    | -0.8011225                                       | 0.008370691     | 0.062206472  | ADPRM |
| 17                                             | 10697594                                         | 10711233        | + 1620       |       |
| protein_coding                                 | "ADP-ribose/CDP-alcohol diphosphatase, manganese |                 |              |       |
| dependent [Source:HGNC Symbol;Acc:HGNC:30925]" | -                                                | 179 163         |              |       |
| 158                                            | 193 253                                          | 422 5.410865018 | 4.767591433  |       |
| 6.068046763                                    | 6.619944343                                      | 9.599594027     | 12.11235119  |       |
| ENSG00000112379                                | 156.9544171                                      | 96.46447169     | 54.63710754  |       |
| 236.2008168                                    | 224.8738902                                      | 171.66517       | 102.6853321  |       |
| 210.9132923                                    | -1.032761213                                     | 0.008372292     | 0.062206472  |       |
| ARFGEF3                                        | 6 138161921                                      | 138344663       | + 14877      |       |
| protein_coding                                 | ARFGEF family member 3 [Source:HGNC              |                 |              |       |
| Symbol;Acc:HGNC:21213]"                        | -                                                | 173 109         | 47 228       | 197   |
| 199                                            | 0.569455017                                      | 0.347166312     | 0.196557374  |       |
| 0.851591911                                    | 0.813950929                                      | 0.621968989     |              |       |
| ENSG00000125378                                | 455.4399849                                      | 478.7823778     | 478.9465598  |       |
| 416.459335                                     | 230.5813493                                      | 189.78059       | 471.0563075  |       |
| 278.9404247                                    | 0.756955466                                      | 0.008375512     | 0.062206472  | BMP4  |

|                        |                                                        |             |             |      |        |
|------------------------|--------------------------------------------------------|-------------|-------------|------|--------|
| 14                     | 53949736                                               | 53958761    | -           | 3082 |        |
| protein_coding         | bone morphogenetic protein 4 [Source:HGNC              |             |             |      |        |
| Symbol;Acc:HGNC:1071]  | -                                                      | 502         | 541         | 412  | 402    |
| 220                    | 7.976268525                                            | 8.317466714 | 8.317090521 |      | 202    |
| 7.247787679            | 4.028710823                                            | 3.319105558 |             |      |        |
| ENSG00000125945        | 362.9003864                                            | 296.4733763 | 416.1720107 |      |        |
| 182.3304551            | 284.2314652                                            | 179.4289214 | 358.5152578 |      |        |
| 215.3302806            | 0.736842119                                            | 0.008381074 | 0.062206472 |      | ZNF436 |
| 1                      | 23359448                                               | 23369442    | -           | 4392 |        |
| protein_coding         | zinc finger protein 436 [Source:HGNC                   |             |             |      |        |
| Symbol;Acc:HGNC:20814] | zf-C2H2                                                | 400         | 335         | 358  | 176    |
| 208                    | 4.459912553                                            | 3.614172828 | 5.071396211 |      | 249    |
| 2.22670344             | 3.484852299                                            | 2.20207457  |             |      |        |
| ENSG00000112763        | 535.2780699                                            | 524.8021258 | 533.5836673 |      |        |
| 248.6324388            | 385.8242379                                            | 401.9897951 | 531.2212877 |      |        |
| 345.4821573            | 0.620104083                                            | 0.008387725 | 0.062206472 |      | BTN2A1 |
| 6                      | 26457904                                               | 26476621    | +           | 3787 |        |
| protein_coding         | butyrophilin subfamily 2 member A1 [Source:HGNC        |             |             |      |        |
| Symbol;Acc:HGNC:1136]  | -                                                      | 590         | 593         | 459  | 240    |
| 466                    | 7.629312253                                            | 7.419691171 | 7.540918152 |      | 338    |
| 3.521502331            | 5.486163613                                            | 5.721654502 |             |      |        |
| ENSG00000164542        | 403.7266799                                            | 274.3484975 | 331.3101202 |      |        |
| 510.732468             | 496.5489453                                            | 511.5449538 | 336.4617658 |      |        |
| 506.2754557            | -0.589593685                                           | 0.008391341 | 0.062206472 |      |        |
| KIAA0895               | 7                                                      | 36324221    | 36390125    | -    | 6728   |
| protein_coding         | KIAA0895 [Source:HGNC Symbol;Acc:HGNC:22206]           |             |             |      |        |
| -                      | 445                                                    | 310         | 285         | 493  | 435    |
| 3.238938574            | 2.183243379                                            | 2.635516405 | 4.071673825 |      |        |
| 3.974208376            | 4.09826209                                             |             |             |      |        |
| ENSG00000149483        | 1112.289684                                            | 1185.893505 | 833.506513  |      |        |
| 1432.744428            | 1442.845671                                            | 1416.453312 | 1043.896567 |      |        |
| 1430.681137            | -0.453518112                                           | 0.008393548 | 0.062206472 |      |        |
| TMEM138                | 11                                                     | 61362001    | 61369509    | +    | 6348   |
| protein_coding         | transmembrane protein 138 [Source:HGNC                 |             |             |      |        |
| Symbol;Acc:HGNC:26944] | -                                                      | 1226        | 1340        | 717  | 1383   |
| 1642                   | 9.457628172                                            | 10.00217206 | 7.027309546 |      | 1264   |
| 12.10590623            | 12.23932638                                            | 12.02727532 |             |      |        |
| ENSG00000129636        | 607.8581472                                            | 511.5271985 | 747.4821309 |      |        |
| 423.7111144            | 465.7286659                                            | 360.5831209 | 622.2891589 |      |        |
| 416.6743004            | 0.578599715                                            | 0.008396583 | 0.062206472 |      | ITFG1  |
| 16                     | 47154387                                               | 47464149    | -           | 7770 |        |
| protein_coding         | integrin alpha FG-GAP repeat containing 1 [Source:HGNC |             |             |      |        |
| Symbol;Acc:HGNC:30697] | -                                                      | 670         | 578         | 643  | 409    |
| 418                    | 4.222624541                                            | 3.524790103 | 5.148690673 |      | 408    |
| 2.924922295            | 3.22765052                                             | 2.50141806  |             |      |        |
| ENSG00000237441        | 1561.378912                                            | 1712.465621 | 2051.797762 |      |        |
| 1298.068524            | 1457.685065                                            | 1195.617717 | 1775.214099 |      |        |
| 1317.123768            | 0.430543803                                            | 0.008397526 | 0.062206472 |      | RGL2   |
| 6                      | 33291654                                               | 33299324    | -           | 4541 |        |
| protein_coding         | ral guanine nucleotide dissociation stimulator like 2  |             |             |      |        |

|                                     |                                                     |             |             |             |
|-------------------------------------|-----------------------------------------------------|-------------|-------------|-------------|
| [Source:HGNC Symbol;Acc:HGNC:9769]  | -                                                   | 1721        | 1935        | 1765        |
| 1253                                | 1277                                                | 1386        | 18.55914872 | 20.19091071 |
| 24.18243641                         | 15.33245196                                         | 17.28569141 | 14.19197203 |             |
| ENSG00000197903                     | 169.6559306                                         | 319.4832503 | 284.8104542 |             |
| 376.0565636                         | 449.7477803                                         | 446.8470255 | 257.9832117 |             |
| 424.2171231                         | -0.718311583                                        | 0.008397821 | 0.062206472 |             |
| HIST1H2BK                           | 6                                                   | 27146418    | 27146798    | -           |
| protein_coding                      | histone cluster 1 H2B family member k               |             |             | 381         |
| [Source:HGNC Symbol;Acc:HGNC:13954] | -                                                   | 187         | 361         | 245         |
| 363                                 | 394                                                 | 518         | 24.03506574 | 44.89610521 |
| 40.0081026                          | 52.94118926                                         | 63.56508124 | 63.21727947 |             |
| ENSG0000010803                      | 1150.394225                                         | 1181.468529 | 1027.642619 |             |
| 724.1419779                         | 905.2030197                                         | 839.3477911 | 1119.835124 |             |
| 822.8975962                         | 0.44516424                                          | 0.00840499  | 0.062213704 | SCMH1       |
| 1                                   | 41027200                                            | 41242154    | -           | 4447        |
| protein_coding                      | Scm polycomb group protein homolog 1 [Source:HGNC   |             |             |             |
| Symbol;Acc:HGNC:19003]              | -                                                   | 1268        | 1335        | 884         |
| 973                                 | 13.96306654                                         | 14.22461685 | 12.36778657 | 793         |
| 8.734179035                         | 10.96108178                                         | 10.17364851 |             |             |
| ENSG00000136169                     | 422.7789501                                         | 466.3924457 | 474.2965932 |             |
| 640.2285298                         | 729.4132782                                         | 578.8307994 | 454.4893297 |             |
| 649.4908691                         | -0.514591912                                        | 0.008405832 | 0.062213704 | SETDB2      |
| 13                                  | 49444374                                            | 49495003    | +           | 6678        |
| protein_coding                      | SET domain bifurcated 2 [Source:HGNC                |             |             |             |
| Symbol;Acc:HGNC:20263]              | MBD                                                 | 466         | 527         | 408         |
| 671                                 | 3.417182594                                         | 3.739302857 | 3.801198901 | 618         |
| 5.14226086                          | 5.881685568                                         | 4.672046145 |             | 639         |
| ENSG00000137166                     | 1958.754836                                         | 1695.650713 | 2372.645457 |             |
| 1232.802509                         | 1625.484363                                         | 1528.596388 | 2009.017002 |             |
| 1462.29442                          | 0.457764988                                         | 0.008415031 | 0.062233938 | FOXP4       |
| 6                                   | 41546426                                            | 41602384    | +           | 6170        |
| protein_coding                      | forkhead box P4 [Source:HGNC Symbol;Acc:HGNC:20842] |             |             |             |
| Fork                                | 2159                                                | 1916        | 2041        | 1190        |
| 17.13547556                         | 14.71420429                                         | 20.58091539 | 1424        | 1772        |
| 14.18639949                         | 13.35394464                                         |             | 10.71701506 |             |
| ENSG00000189149                     | 19.05227029                                         | 8.849951531 | 9.299933199 |             |
| 58.01423571                         | 50.22564044                                         | 31.05500563 | 12.40071834 |             |
| 46.43162726                         | -1.897324286                                        | 0.008415602 | 0.062233938 | CRYM-       |
| AS1                                 | 16                                                  | 21300849    | 21339037    | +           |
| transcribed_unitary_pseudogene      | CRYM antisense RNA 1 [Source:HGNC                   |             |             |             |
| Symbol;Acc:HGNC:34405]              | -                                                   | 21          | 10          | 8           |
| 36                                  | 0.374496226                                         | 0.172554348 | 0.181257631 | 56          |
| 1.133181662                         | 0.984916706                                         | 0.609583195 |             | 44          |
| ENSG00000105486                     | 1973.270851                                         | 1866.454778 | 2000.648129 |             |
| 1675.161056                         | 1420.015834                                         | 1364.69497  | 1946.791253 |             |
| 1486.623953                         | 0.389128881                                         | 0.008422851 | 0.062261519 | LIG1        |
| 19                                  | 48115445                                            | 48170603    | -           | 6576        |
| protein_coding                      | DNA ligase 1 [Source:HGNC Symbol;Acc:HGNC:6598]     |             |             |             |
| 2175                                | 2109                                                | 1721        | 1617        | 1244        |
| 15.19641748                         | 16.28268092                                         | 13.66344645 | 1582        | 16.19668516 |
|                                     |                                                     |             |             | 11.62802444 |

|                        |                                                       |             |             |             |      |       |
|------------------------|-------------------------------------------------------|-------------|-------------|-------------|------|-------|
|                        | 11.18602261                                           |             |             |             |      |       |
| ENSG00000105552        | 834.6708887                                           | 1072.614126 | 986.9554108 |             |      |       |
| 1235.910414            | 1313.857094                                           | 1351.755384 | 964.7468083 |             |      |       |
| 1300.507631            | -0.431049855                                          | 0.008435904 | 0.062331959 |             |      | BCAT2 |
| 19                     | 48795062                                              | 48811029    | -           | 4553        |      |       |
| protein_coding         | branched chain amino acid transaminase 2 [Source:HGNC |             |             |             |      |       |
| Symbol;Acc:HGNC:977]   | -                                                     | 920         | 1212        | 849         | 1193 | 1151  |
| 1567                   | 9.895069766                                           | 12.61337798 | 11.60157325 |             |      |       |
| 14.55978081            | 15.53907037                                           | 16.00303534 |             |             |      |       |
| ENSG00000175602        | 4371.135154                                           | 5333.865788 | 4455.830494 |             |      |       |
| 5200.561844            | 5887.81485                                            | 8304.626089 | 4720.277145 |             |      |       |
| 6464.334261            | -0.453753337                                          | 0.008442526 | 0.062354032 |             |      |       |
| CCDC85B                | 11                                                    | 65890112    | 65891635    | +           | 1524 |       |
| protein_coding         | coiled-coil domain containing 85B [Source:HGNC        |             |             |             |      |       |
| Symbol;Acc:HGNC:24926] | -                                                     | 4818        | 6027        | 3833        | 5020 | 5158  |
| 9627                   | 154.8140999                                           | 187.3883837 | 156.4806707 |             |      |       |
| 183.0335882            | 208.0385083                                           | 293.7223694 |             |             |      |       |
| ENSG00000169914        | 594.2493827                                           | 458.4274893 | 406.8720775 |             |      |       |
| 326.3300759            | 343.5890403                                           | 286.396163  | 486.5163165 |             |      |       |
| 318.7717597            | 0.611991481                                           | 0.008445942 | 0.062354032 |             |      | OTUD3 |
| 1                      | 19882513                                              | 19912945    | +           | 6767        |      |       |
| protein_coding         | OTU deubiquitinase 3 [Source:HGNC                     |             |             |             |      |       |
| Symbol;Acc:HGNC:29038] | -                                                     | 655         | 518         | 350         | 315  | 301   |
| 332                    | 4.739950508                                           | 3.627104132 | 3.217945722 |             |      |       |
| 2.586583012            | 2.734120677                                           | 2.281250229 |             |             |      |       |
| ENSG00000172167        | 445.4602243                                           | 407.9827656 | 387.1097194 |             |      |       |
| 315.9703909            | 271.6750551                                           | 205.3080928 | 413.5175698 |             |      |       |
| 264.3178463            | 0.647830345                                           | 0.008487915 | 0.062612736 |             |      | MTBP  |
| 8                      | 120445400                                             | 120542133   | +           | 8326        |      |       |
| protein_coding         | MDM2 binding protein [Source:HGNC                     |             |             |             |      |       |
| Symbol;Acc:HGNC:7417]  | -                                                     | 491         | 461         | 333         | 305  | 238   |
| 238                    | 2.887844266                                           | 2.623559751 | 2.488368377 |             |      |       |
| 2.035520481            | 1.757065335                                           | 1.329142572 |             |             |      |       |
| ENSG00000147383        | 1002.512317                                           | 1274.39302  | 1188.066466 |             |      |       |
| 1301.17643             | 1781.868744                                           | 1685.596694 | 1154.990601 |             |      |       |
| 1589.547289            | -0.460797805                                          | 0.008490735 | 0.062612736 |             |      | NSDHL |
| X                      | 152830967                                             | 152869729   | +           | 1996        |      |       |
| protein_coding         | NAD(P) dependent steroid dehydrogenase-like           |             |             |             |      |       |
| [Source:HGNC           | Symbol;Acc:HGNC:13398]                                |             | -           | 1105        | 1440 | 1022  |
| 1256                   | 1561                                                  | 1954        | 27.11005662 | 34.18443419 |      |       |
| 31.85643738            | 34.96561297                                           | 48.07172718 | 45.519244   |             |      |       |
| ENSG00000109743        | 0.907250966                                           | 2.654985459 | 4.6499666   |             |      |       |
| 30.04308635            | 28.5372957                                            | 8.626390453 | 2.737401008 |             |      |       |
| 22.4022575             | -3.056791422                                          | 0.008494253 | 0.062612736 |             |      | BST1  |
| 4                      | 15702950                                              | 15738313    | +           | 2980        |      |       |
| protein_coding         | bone marrow stromal cell antigen 1 [Source:HGNC       |             |             |             |      |       |
| Symbol;Acc:HGNC:1118]  | -                                                     | 1           | 3           | 4           | 29   | 25    |
| 10                     | 0.016432832                                           | 0.047701434 | 0.083512325 |             |      |       |
| 0.540746575            | 0.515669096                                           | 0.156032388 |             |             |      |       |
| ENSG00000188070        | 558.866595                                            | 614.1866363 | 688.1950567 |             |      |       |

|                 |                                     |                                                |             |             |
|-----------------|-------------------------------------|------------------------------------------------|-------------|-------------|
| 784.2281506     | 821.8741163                         | 1016.188795                                    | 620.416096  |             |
| 874.0970208     | -0.496145388                        | 0.008495142                                    | 0.062612736 |             |
| C11orf95        | 11                                  | 63759892                                       | 63768775    | -           |
|                 | protein_coding                      | chromosome 11 open reading frame 95            |             | 5948        |
|                 | [Source:HGNC Symbol;Acc:HGNC:28449] | -                                              | 616         | 694         |
|                 | 757                                 | 720                                            | 1178        | 5.071523426 |
| 6.192379917     | 7.07191388                          | 7.440616086                                    | 9.208848935 |             |
| ENSG00000163166 | 895.4567034                         | 822.1604972                                    | 759.1070474 |             |
| 587.3941366     | 628.9619973                         | 584.0066337                                    | 825.5747493 |             |
| 600.1209225     | 0.461034901                         | 0.008503141                                    | 0.062645587 | IWS1        |
|                 | 2                                   | 127436207                                      | 127526886   | -           |
|                 | 4150                                |                                                |             |             |
|                 | protein_coding                      | "IWS1, SUPT6H interacting protein [Source:HGNC |             |             |
|                 | Symbol;Acc:HGNC:25467]"             | -                                              | 987         | 929         |
|                 | 677                                 | 11.64656191                                    | 10.60703637 | 9.789757434 |
| 7.591839286     | 8.161140645                         | 7.585279534                                    |             |             |
| ENSG00000214253 | 709.4702554                         | 928.3599156                                    | 985.7929191 |             |
| 668.1996792     | 541.0671266                         | 626.2759469                                    | 874.54103   |             |
| 611.8475842     | 0.51427074                          | 0.008513196                                    | 0.062693557 | FIS1        |
|                 | 7                                   | 101239458                                      | 101252316   | -           |
|                 | 1795                                |                                                |             |             |
|                 | protein_coding                      | "fission, mitochondrial 1 [Source:HGNC         |             |             |
|                 | Symbol;Acc:HGNC:21689]"             | -                                              | 782         | 1049        |
|                 | 726                                 | 21.33393579                                    | 27.69092581 | 29.39261635 |
| 19.96674656     | 16.23159691                         | 18.80629247                                    |             |             |
| ENSG00000169299 | 1568.63692                          | 1185.893505                                    | 1134.59185  |             |
| 1144.745187     | 801.3272634                         | 707.3640171                                    | 1296.374092 |             |
| 884.4788225     | 0.552358116                         | 0.008537057                                    | 0.062843111 | PGM2        |
|                 | 4                                   | 37826633                                       | 37862937    | +           |
|                 | 3704                                |                                                |             |             |
|                 | protein_coding                      | phosphoglucomutase 2 [Source:HGNC              |             |             |
|                 | Symbol;Acc:HGNC:8906]"              | -                                              | 1729        | 1340        |
|                 | 820                                 | 22.85876163                                    | 17.14195147 | 16.39402852 |
| 16.57690099     | 11.64966654                         | 10.29375654                                    |             |             |
| ENSG00000188895 | 1725.591337                         | 1716.890597                                    | 1985.535738 |             |
| 1254.557847     | 1442.845671                         | 1435.431371                                    | 1809.339224 |             |
| 1377.61163      | 0.392811679                         | 0.008544176                                    | 0.062869356 | MSL1        |
|                 | 17                                  | 40122298                                       | 40136916    | +           |
|                 | 7397                                |                                                |             |             |
|                 | protein_coding                      | male specific lethal 1 homolog [Source:HGNC    |             |             |
|                 | Symbol;Acc:HGNC:27905]"             | -                                              | 1902        | 1940        |
|                 | 1664                                | 12.59167708                                    | 12.42717895 | 14.36610692 |
| 9.097049714     | 10.5036155                          | 10.45992863                                    |             |             |
| ENSG00000110955 | 11327.02831                         | 11631.4913                                     | 13536.05277 |             |
| 9462.536232     | 10240.32319                         | 9410.529345                                    | 12164.85746 |             |
| 9704.462923     | 0.32594229                          | 0.008547951                                    | 0.062870978 |             |
| ATP5F1B         | 12                                  | 56638175                                       | 56646068    | -           |
|                 | 2322                                |                                                |             |             |
|                 | protein_coding                      | ATP synthase F1 subunit beta [Source:HGNC      |             |             |
|                 | Symbol;Acc:HGNC:830]"               | -                                              | 12485       | 13143       |
|                 | 10909                               | 263.3025195                                    | 268.1999752 | 311.9944209 |
| 218.5802083     | 237.479432                          | 218.4508528                                    |             |             |
| ENSG00000260920 | 40.82629347                         | 24.77986429                                    | 66.26202404 |             |
| 107.7407235     | 95.88531357                         | 112.1430759                                    | 43.9560606  |             |
| 105.256371      | -1.269084093                        | 0.008552185                                    | 0.062875977 |             |

|                         |                                                      |             |                                      |             |                |
|-------------------------|------------------------------------------------------|-------------|--------------------------------------|-------------|----------------|
| AL031985.3              | 1                                                    | 40464319    | 40466767                             | +           | 2449           |
| sense_overlapping       |                                                      |             | "novel transcript, sense overlapping |             |                |
| with ZNF643"            | -                                                    | 45          | 28                                   | 57          | 104            |
|                         |                                                      | 84          | 130                                  |             |                |
|                         | 0.899813308                                          | 0.541745967 | 1.448081206                          | 2.359698942 |                |
|                         | 2.108326469                                          | 2.468229765 |                                      |             |                |
| ENSG0000031698          | 3530.113509                                          | 4593.124845 | 5253.299766                          |             |                |
| 4760.275234             | 6969.949103                                          | 6763.952754 | 4458.84604                           |             |                |
| 6164.725697             | -0.46758868                                          | 0.008558004 | 0.06289262                           |             | SARS           |
| 1                       | 109213918                                            | 109238169   | +                                    | 3836        |                |
| protein_coding          | seryl-tRNA synthetase [Source:HGNC                   |             |                                      |             |                |
| Symbol;Acc:HGNC:10537]  | -                                                    | 3891        | 5190                                 | 4519        | 4595           |
|                         | 7841                                                 | 49.67196214 | 64.1084387                           | 73.29436548 | 6106           |
| 66.56086556             | 97.84205409                                          | 95.04381789 |                                      |             |                |
| ENSG00000196352         | 146.9746565                                          | 146.0242003 | 72.07448229                          |             |                |
| 287.9992416             | 181.4972007                                          | 230.3246251 | 121.691113                           |             |                |
| 233.2736891             | -0.93473114                                          | 0.008566441 | 0.062928477                          |             | CD55           |
| 1                       | 207321376                                            | 207386804   | +                                    | 5908        |                |
| protein_coding          | CD55 molecule (Cromer blood group) [Source:HGNC      |             |                                      |             |                |
| Symbol;Acc:HGNC:2665]   | -                                                    | 162         | 165                                  | 62          | 278            |
|                         | 267                                                  | 1.34277489  | 1.323335303                          | 0.65291711  | 159            |
| 2.614666803             | 1.654260873                                          | 2.101366444 |                                      |             |                |
| ENSG00000180537         | 667.736711                                           | 615.9566266 | 834.6690046                          |             |                |
| 566.6747667             | 457.7382231                                          | 417.5172979 | 706.1207807                          |             |                |
| 480.6434292             | 0.554446793                                          | 0.008597915 | 0.063133463                          |             | RNF182         |
| 6                       | 13924446                                             | 13980302    | +                                    | 4090        |                |
| protein_coding          | ring finger protein 182 [Source:HGNC                 |             |                                      |             |                |
| Symbol;Acc:HGNC:28522]  | -                                                    | 736         | 696                                  | 718         | 547            |
|                         | 484                                                  | 8.812176557 | 8.063291722                          | 10.92214613 | 401            |
| 7.43149281              | 6.026545292                                          | 5.502411571 |                                      |             |                |
| ENSG00000255306         | 0.907250966                                          | 0.884995153 | 1.16249165                           |             |                |
| 38.33083431             | 0                                                    | 18.11541995 | 0.98491259                           | 18.81541809 |                |
|                         | -4.26716544                                          | 0.008603154 | 0.06314134                           | AC004923.4  |                |
| 11                      | 68024809                                             | 68030461    | -                                    | 739         |                |
| antisense               | novel transcript                                     |             | -                                    | 1           | 1              |
| 37                      | 0                                                    | 21          | 0.066265007                          | 0.0641183   | 1              |
| 0.084190368             | 2.782078175                                          | 0           | 1.321313507                          |             |                |
| ENSG00000213380         | 1015.213831                                          | 1011.54946  | 914.8809285                          |             |                |
| 1070.155455             | 1377.780637                                          | 1688.184612 | 980.5480731                          |             |                |
| 1378.706901             | -0.491856136                                         | 0.008606126 | 0.06314134                           |             | COG8           |
| 16                      | 69320140                                             | 69339667    | -                                    | 7450        |                |
| protein_coding          | component of oligomeric golgi complex 8 [Source:HGNC |             |                                      |             |                |
| Symbol;Acc:HGNC:18623]  | -                                                    | 1119        | 1143                                 | 787         | 1033           |
|                         | 1957                                                 | 7.355335674 | 7.269698483                          | 6.572419965 | 1207           |
| 7.704706374             | 9.958601578                                          | 12.2142153  |                                      |             |                |
| ENSG00000118898         | 136.9948959                                          | 76.10958317 | 45.33717435                          |             |                |
| 43.51067679             | 27.39580388                                          | 18.978059   | 86.14721779                          |             |                |
| 29.96151322             | 1.530012428                                          | 0.008615512 | 0.063183996                          |             | PPL            |
| 16                      | 4882507                                              | 4960741     | -                                    | 7686        | protein_coding |
| periplakin [Source:HGNC | Symbol;Acc:HGNC:9273]                                |             |                                      |             |                |
|                         | -                                                    | 151         | 86                                   |             |                |
| 39                      | 42                                                   | 24          | 22                                   | 0.962066851 | 0.53018143     |



|                                  |                                                          |                        |                 |              |                         |
|----------------------------------|----------------------------------------------------------|------------------------|-----------------|--------------|-------------------------|
|                                  | 0.31569745                                               | 0.303641378            | 0.191936788     | 0.133092419  |                         |
| ENSG00000238123                  | 0                                                        | 3.539980612            | 4.6499666       | 12.43162194  |                         |
|                                  | 22.82983656                                              | 35.36820086            | 2.729982404     | 23.54321979  |                         |
|                                  | -3.135860862                                             | 0.008628971            | 0.063256473     | MID1IP1-AS1  |                         |
| X                                | 38801568                                                 | 38803883               | -               | 376          |                         |
| antisense                        | MID1IP1                                                  | antisense RNA 1        | [Source:HGNC    |              |                         |
| Symbol;Acc:HGNC:40932]           | -                                                        | 0                      | 4               | 4            | 12 20                   |
|                                  | 41                                                       | 0                      | 0.504078979     | 0.661879596  | 1.773394858             |
|                                  | 3.269561501                                              | 5.070222637            |                 |              |                         |
| ENSG00000140297                  | 0                                                        | 2.654985459            | 2.3249833       | 34.18696033  |                         |
|                                  | 6.848950969                                              | 17.25278091            | 1.659989586     | 19.42956407  |                         |
|                                  | -3.565589067                                             | 0.008636405            | 0.063284744     | GCNT3        | 15                      |
|                                  | 59594875                                                 | 59640239               | +               | 6475         | protein_coding          |
|                                  | "glucosaminyl (N-acetyl) transferase 3, mucin type       |                        |                 |              |                         |
| [Source:HGNC                     | Symbol;Acc:HGNC:4205]"                                   | -                      | 0               | 3            | 2                       |
|                                  | 33                                                       | 6                      | 20              | 0            | 0.02195371 0.019217508  |
|                                  | 0.28319541                                               | 0.056958539            | 0.14362209      |              |                         |
| ENSG00000147853                  | 1175.797252                                              | 869.9502355            | 1196.203908     |              |                         |
| 970.7024797                      | 642.6598993                                              | 444.2591083            | 1080.650465     |              |                         |
| 685.8738291                      | 0.656416948                                              | 0.008658429            | 0.063419853     | AK3          |                         |
|                                  | 9                                                        | 4709559                | 4742043         | -            | 4483                    |
| adenylate kinase 3               | [Source:HGNC                                             | Symbol;Acc:HGNC:17376] | -               |              | 1296                    |
|                                  | 983                                                      | 1029                   | 937             | 563          | 515                     |
| 10.38989646                      | 14.28083109                                              | 11.61402872            | 7.719461689     |              |                         |
| 5.341577185                      |                                                          |                        |                 |              |                         |
| ENSG00000236829                  | 46.26979926                                              | 31.85982551            | 9.299933199     |              |                         |
| 79.76957411                      | 122.1396256                                              | 62.11001126            | 29.14318599     |              |                         |
| 88.00640366                      | -1.582046913                                             | 0.008665136            | 0.063442712     |              |                         |
| Z97634.1                         | 16                                                       | 382097                 | 392960          | +            | 2291                    |
| transcribed_processed_pseudogene |                                                          |                        | uncharacterized | LOC100134368 |                         |
| [Source:NCBI                     | gene;Acc:100134368]                                      | -                      | 51              | 36           | 8                       |
|                                  | 77                                                       | 107                    | 72              | 1.090118652  | 0.744567117             |
| 0.217255983                      | 1.8675734                                                | 2.870820565            | 1.461296773     |              |                         |
| ENSG00000144647                  | 710.3775064                                              | 1038.099315            | 784.6818637     |              |                         |
| 1108.48629                       | 1389.195555                                              | 1101.590061            | 844.3862282     |              |                         |
| 1199.757302                      | -0.505814813                                             | 0.008681463            | 0.063530347     |              |                         |
| POMGNT2                          | 3                                                        | 43079232               | 43106076        | -            | 2668                    |
| protein_coding                   | "protein O-linked mannose N-                             |                        |                 |              |                         |
|                                  | acetylglucosaminyltransferase 2 (beta 1,4-) [Source:HGNC |                        |                 |              |                         |
| Symbol;Acc:HGNC:25902]"          | -                                                        | 783                    | 1173            | 675          | 1070 1217               |
|                                  | 1277                                                     | 14.37158343            | 20.83236747     | 15.74072727  |                         |
| 22.28486441                      | 28.03832808                                              | 22.25543514            |                 |              |                         |
| ENSG00000168394                  | 657.7569503                                              | 838.09041              | 838.1564796     |              |                         |
| 928.2277714                      | 1118.661992                                              | 1213.733137            | 778.00128       |              |                         |
| 1086.8743                        | -0.483105597                                             | 0.008684289            | 0.063530347     | TAP1         |                         |
|                                  | 6                                                        | 32845209               | 32853978        | -            | 4805                    |
| protein_coding                   | "transporter 1, ATP binding cassette subfamily B         |                        |                 |              |                         |
| member                           | [Source:HGNC                                             | Symbol;Acc:HGNC:43]"   | -               | 725          | 947                     |
|                                  | 721                                                      | 896                    | 980             | 1407         | 7.388789569 9.338626968 |
|                                  | 9.335739381                                              | 10.36159615            | 12.53660793     | 13.61544134  |                         |

|                                      |                                                     |             |               |        |
|--------------------------------------|-----------------------------------------------------|-------------|---------------|--------|
| ENSG00000197448                      | 756.6473056                                         | 877.0301967 | 883.4936539   |        |
| 581.1783256                          | 632.3864728                                         | 616.7869174 | 839.0570521   |        |
| 610.1172386                          | 0.459423126                                         | 0.008694094 | 0.063575789   | GSTK1  |
| 7                                    | 143244093                                           | 143270854   | + 4228        |        |
| protein_coding                       | glutathione S-transferase kappa 1 [Source:HGNC      |             |               |        |
| Symbol;Acc:HGNC:16906]               | -                                                   | 834 991     | 760 561       | 554    |
| 715                                  | 9.659613628                                         | 11.10619045 | 11.18369875   |        |
| 7.37292687                           | 8.054195115                                         | 7.863249958 |               |        |
| ENSG00000280407                      | 60.78581472                                         | 48.67473342 | 30.2247829    |        |
| 15.53952742                          | 13.69790194                                         | 10.35166854 | 46.56177701   |        |
| 13.19636597                          | 1.825984593                                         | 0.008703551 | 0.06361864    |        |
| AC132872.4                           | 17 82249067                                         | 82251844    | + 2778        |        |
| TEC                                  | TEC -                                               | 67 55       | 26 15         | 12     |
| 12                                   | 1.181058052                                         | 0.938116747 | 0.582301559   |        |
| 0.300034407                          | 0.265519465                                         | 0.200853786 |               |        |
| ENSG00000117569                      | 599.6928885                                         | 461.9674699 | 484.759018    |        |
| 469.2937282                          | 212.31748                                           | 206.1707318 | 515.4731255   |        |
| 295.9273134                          | 0.801390812                                         | 0.008734269 | 0.063816807   | PTBP2  |
| 1                                    | 96721665                                            | 96823738    | + 12937       |        |
| protein_coding                       | polypyrimidine tract binding protein 2 [Source:HGNC |             |               |        |
| Symbol;Acc:HGNC:17662]               | -                                                   | 661 522     | 417 453       | 186    |
| 239                                  | 2.502053345                                         | 1.911892043 | 2.005438386   |        |
| 1.945703533                          | 0.883744505                                         | 0.859004306 |               |        |
| ENSG00000243147                      | 243.1432589                                         | 384.9728916 | 402.2221109   |        |
| 177.1506126                          | 165.5163151                                         | 257.0664355 | 343.4460871   |        |
| 199.9111211                          | 0.777277698                                         | 0.008771093 | 0.064059401   | MRPL33 |
| 2                                    | 27771717                                            | 27988087    | + 1539        |        |
| protein_coding                       | mitochondrial ribosomal protein L33 [Source:HGNC    |             |               |        |
| Symbol;Acc:HGNC:14487]               | -                                                   | 268 435     | 346 171       | 145    |
| 298                                  | 8.527561452                                         | 13.39297561 | 13.98763611   |        |
| 6.174041356                          | 5.791309066                                         | 9.00344389  |               |        |
| ENSG00000147274                      | 7395.002624                                         | 6780.832863 | 7966.555277   |        |
| 6280.041016                          | 5867.267997                                         | 5437.213902 | 7380.796921   |        |
| 5861.507638                          | 0.332470147                                         | 0.008786103 | 0.064142542   | RBMX   |
| X                                    | 136848004                                           | 136880764   | - 5882        |        |
| protein_coding                       | RNA binding motif protein X-linked [Source:HGNC     |             |               |        |
| Symbol;Acc:HGNC:9910]                | -                                                   | 8151 7662   | 6853 6062     | 5140   |
| 6303                                 | 67.86010957                                         | 61.72250852 | 72.48740595   |        |
| 57.26680522                          | 53.71374821                                         | 49.8256881  |               |        |
| ENSG00000267278                      | 45.3625483                                          | 18.58489822 | 6.974949899   | 0      |
| 5.707459141                          | 0                                                   | 23.6407988  | 1.90248638    |        |
| 3.698911079                          | 0.008791207                                         | 0.064153326 | MAP3K14-AS1   | 17     |
| 45247925                             | 45268630                                            | + 3775      | antisense     |        |
| MAP3K14 antisense RNA 1 [Source:HGNC | Symbol;Acc:HGNC:44359]                              |             |               |        |
| -                                    | 50 21                                               | 6 0         | 5 0           |        |
| 0.64860715                           | 0.263589909                                         | 0.098887442 | 0 0.081414247 |        |
| 0                                    |                                                     |             |               |        |
| ENSG00000143819                      | 626.0031665                                         | 687.641234  | 789.3318303   |        |
| 548.0273338                          | 478.285076                                          | 447.7096645 | 700.9920769   |        |
| 491.3406914                          | 0.512304899                                         | 0.008809794 | 0.064262454   | EPHX1  |

|                                     |                                                        |             |           |       |             |
|-------------------------------------|--------------------------------------------------------|-------------|-----------|-------|-------------|
| 1                                   | 225810092                                              | 225845563   | +         | 2508  |             |
| protein_coding                      | epoxide hydrolase 1 [Source:HGNC Symbol;Acc:HGNC:3401] |             |           |       |             |
| -                                   | 690                                                    | 777         | 679       | 529   | 419 519     |
| 13.47256359                         | 14.67979286                                            | 16.84414955 |           |       | 11.72033927 |
| 10.26913471                         | 9.622121662                                            |             |           |       |             |
| ENSG00000205707                     | 193.2444558                                            | 184.0789918 |           |       | 166.2363059 |
| 114.9925029                         | 90.17785443                                            | 96.61557307 |           |       | 181.1865845 |
| 100.5953101                         | 0.849450507                                            | 0.008816585 |           |       | 0.064278602 |
| 12                                  | 25195216                                               | 25209645    | +         | 2466  | ETFRF1      |
| protein_coding                      | electron transfer flavoprotein regulatory factor 1     |             |           |       |             |
| [Source:HGNC Symbol;Acc:HGNC:27052] | -                                                      |             |           | 213   | 208 143     |
| 111                                 | 79                                                     | 112         |           |       | 4.229755022 |
| 3.607861122                         | 2.501162739                                            | 1.969161696 |           |       | 3.996655395 |
| ENSG00000161671                     | 548.8868344                                            | 889.4201289 |           |       | 2.111815478 |
| 485.8692241                         | 390.3902052                                            | 599.5341365 |           |       | 834.6690046 |
| 491.9311886                         | 0.621319239                                            | 0.008824556 |           |       | 757.658656  |
| 19                                  | 50476400                                               | 50490870    | +         | 10748 | 0.064278602 |
| protein_coding                      | ER membrane protein complex subunit 10 [Source:HGNC    |             |           |       |             |
| Symbol;Acc:HGNC:27609]              | -                                                      | 605         | 1005      | 718   | 469 342     |
| 695                                 | 2.756489868                                            | 4.430623481 |           |       | 4.156268857 |
| 2.424695624                         | 1.955896225                                            | 3.00668662  |           |       |             |
| ENSG00000238279                     | 13.60876449                                            | 7.964956378 |           |       | 5.812458249 |
| 0                                   | 0                                                      | 9.128726372 | 0         |       | 5.625476754 |
| 0.008826471                         | 0.064278602                                            | BX470102.1  | 1         |       | 153533603   |
| 153535115                           | +                                                      | 531         | antisense |       | novel       |
| transcript                          | -                                                      | 15          | 9         | 5     | 0 0 0       |
| 1.383328809                         | 0.803108882                                            | 0.585844463 |           |       | 0 0         |
| 0                                   |                                                        |             |           |       |             |
| ENSG00000104823                     | 1437.992781                                            | 1866.454778 |           |       | 1943.686039 |
| 2071.93699                          | 2506.716055                                            | 2465.422391 |           |       | 1749.377866 |
| 2348.025145                         | -0.425009567                                           | 0.008830962 |           |       | 0.064278602 |
| 19                                  | 38815422                                               | 38832005    | -         | 2467  | ECH1        |
| protein_coding                      | enoyl-CoA hydratase 1 [Source:HGNC                     |             |           |       |             |
| Symbol;Acc:HGNC:3149]               | -                                                      | 1585        | 2109      | 1672  | 2000 2196   |
| 2858                                | 31.46217922                                            | 40.5073536  |           |       | 42.16712295 |
| 45.04772777                         | 54.71552195                                            | 53.86716173 |           |       |             |
| ENSG00000127184                     | 2318.933469                                            | 3039.073356 |           |       | 2651.643453 |
| 1920.68559                          | 1959.941469                                            | 2211.806512 |           |       | 2669.883426 |
| 2030.81119                          | 0.39449751                                             | 0.008831099 |           |       | 0.064278602 |
| 5                                   | 86617904                                               | 86620962    | +         | 1993  | COX7C       |
| protein_coding                      | cytochrome c oxidase subunit 7C [Source:HGNC           |             |           |       |             |
| Symbol;Acc:HGNC:2292]               | -                                                      | 2556        | 3434      | 2281  | 1854 1717   |
| 2564                                | 62.80326674                                            | 81.64308992 |           |       | 71.20735156 |
| 51.69094534                         | 52.95541266                                            | 59.81935697 |           |       |             |
| ENSG00000254470                     | 840.1143945                                            | 948.7148041 |           |       | 809.0941883 |
| 870.2135357                         | 1418.874342                                            | 1509.618329 |           |       | 865.9744623 |
| 1266.235402                         | -0.548070751                                           | 0.008833811 |           |       | 0.064278602 |
| 11                                  | 65775893                                               | 65780802    | -         | 4811  | AP5B1       |
| protein_coding                      | adaptor related protein complex 5 subunit beta 1       |             |           |       |             |
| [Source:HGNC Symbol;Acc:HGNC:25104] | -                                                      |             |           | 926   | 1072 696    |

|                        |                                      |      |              |             |        |
|------------------------|--------------------------------------|------|--------------|-------------|--------|
| 840                    | 1243                                 | 1750 | 9.425498168  | 10.55810239 |        |
| 9.000792076            | 9.701881657                          |      | 15.8811933   | 16.91350865 |        |
| ENSG00000103404        | 410.0774366                          |      | 452.2325232  | 373.1598196 |        |
| 516.948279             | 593.5757507                          |      | 695.2870705  | 411.8232598 |        |
| 601.9370334            | -0.54736637                          |      | 0.008840442  | 0.064300406 | USP31  |
| 16                     | 23061406                             |      | 23149270     | - 12017     |        |
| protein_coding         | ubiquitin specific peptidase         | 31   | [Source:HGNC |             |        |
| Symbol;Acc:HGNC:20060] | -                                    | 452  | 511          | 321         | 499    |
| 806                    | 1.841921245                          |      | 2.014889714  | 1.661941826 | 520    |
| 2.307366209            | 2.65983467                           |      | 3.118674137  |             |        |
| ENSG00000139437        | 716.7282631                          |      | 690.2962194  | 685.8700734 |        |
| 586.3581681            | 348.1550076                          |      | 469.2756406  | 697.6315187 |        |
| 467.9296054            | 0.575459007                          |      | 0.008844214  | 0.064301395 | TCHP   |
| 12                     | 109900264                            |      | 109983841    | + 9054      |        |
| protein_coding         | trichoplein keratin filament binding |      | [Source:HGNC |             |        |
| Symbol;Acc:HGNC:28135] | -                                    | 790  | 780          | 590         | 566    |
| 544                    | 4.272826758                          |      | 4.082070992  | 4.054323214 | 305    |
| 3.473665415            | 2.07065006                           |      | 2.79376214   |             |        |
| ENSG00000136156        | 2247.260643                          |      | 2376.211986  | 2787.654976 |        |
| 2145.490753            | 1849.216762                          |      | 1378.497194  | 2470.375868 |        |
| 1791.068236            | 0.464133885                          |      | 0.008858992  | 0.064382377 | ITM2B  |
| 13                     | 48232612                             |      | 48270357     | + 10706     |        |
| protein_coding         | integral membrane protein 2B         |      | [Source:HGNC |             |        |
| Symbol;Acc:HGNC:6174]  | -                                    | 2477 | 2685         | 2398        | 2071   |
| 1598                   | 11.32993585                          |      | 11.88347596  | 13.93569993 | 1620   |
| 10.7489218             | 9.301117605                          |      | 6.940336923  |             |        |
| ENSG00000178974        | 457.2544869                          |      | 481.4373633  | 639.3704074 |        |
| 410.243524             | 214.6004637                          |      | 345.9182572  | 526.0207525 |        |
| 323.5874149            | 0.698590939                          |      | 0.00886438   | 0.064395077 | FBX034 |
| 14                     | 55271303                             |      | 55361918     | + 4133      |        |
| protein_coding         | F-box protein 34                     |      | [Source:HGNC |             |        |
| Symbol;Acc:HGNC:20201] | -                                    | 504  | 544          | 550         | 396    |
| 5.971642699            | 6.23677297                           |      | 8.279500388  | 5.324046308 |        |
| 2.796016978            | 4.511385979                          |      |              |             |        |
| ENSG00000099204        | 11.79426256                          |      | 15.0449176   | 6.974949899 |        |
| 39.36680281            | 29.67878753                          |      | 61.24737221  | 11.27137669 |        |
| 43.43098752            | -1.939063687                         |      | 0.008879546  | 0.064429245 | ABLIM1 |
| 10                     | 114431113                            |      | 114685003    | - 10039     |        |
| protein_coding         | actin binding LIM protein 1          |      | [Source:HGNC |             |        |
| Symbol;Acc:HGNC:78]    | -                                    | 13   | 17           | 6           | 38     |
| 71                     | 0.063413479                          |      | 0.080238889  | 0.037184988 | 26     |
| 0.21033192             | 0.159195304                          |      | 0.328850807  |             |        |
| ENSG00000136689        | 5.443505796                          |      | 1.769990306  | 6.974949899 |        |
| 21.75533839            | 19.40536108                          |      | 42.26931322  | 4.729482    |        |
| 27.81000423            | -2.576744646                         |      | 0.008879815  | 0.064429245 | IL1RN  |
| 2                      | 113107214                            |      | 113134016    | + 3256      |        |
| protein_coding         | interleukin 1 receptor antagonist    |      | [Source:HGNC |             |        |
| Symbol;Acc:HGNC:6000]  | -                                    | 6    | 2            | 6           | 21     |
| 49                     | 0.090239263                          |      | 0.029105297  | 0.114649905 | 17     |
| 0.358382622            | 0.32093116                           |      | 0.699749669  |             |        |

|                                     |                                                       |             |             |        |
|-------------------------------------|-------------------------------------------------------|-------------|-------------|--------|
| ENSG00000103121                     | 589.7131279                                           | 738.9709529 | 631.2329659 |        |
| 494.1569721                         | 375.5508115                                           | 477.9020311 | 653.3056822 |        |
| 449.2032715                         | 0.539694667                                           | 0.008882439 | 0.064429245 | CMC2   |
| 16                                  | 80966448                                              | 81020270    | - 12781     |        |
| protein_coding                      | C-X9-C motif containing 2 [Source:HGNC                |             |             |        |
| Symbol;Acc:HGNC:24447]              | -                                                     | 650 835     | 543 477     | 329    |
| 554                                 | 2.490446435                                           | 3.095623119 | 2.643271914 |        |
| 2.073793877                         | 1.582262092                                           | 2.01546819  |             |        |
| ENSG00000110944                     | 24.49577608                                           | 5.309970919 | 3.48747495  |        |
| 13.46759043                         | 49.08414861                                           | 105.2419635 | 11.09774065 |        |
| 55.93123419                         | -2.324674712                                          | 0.008885384 | 0.064429245 | IL23A  |
| 12                                  | 56334174                                              | 56340410    | + 1187      |        |
| protein_coding                      | interleukin 23 subunit alpha [Source:HGNC             |             |             |        |
| Symbol;Acc:HGNC:15488]              | -                                                     | 27 6        | 3 13        | 43     |
| 122                                 | 1.113888522                                           | 0.239511832 | 0.157245195 |        |
| 0.608561785                         | 2.226717369                                           | 4.779034105 |             |        |
| ENSG00000183605                     | 364.7148883                                           | 406.2127753 | 361.5349031 |        |
| 606.0415695                         | 466.8701577                                           | 583.1439946 | 377.4875222 |        |
| 552.0185739                         | -0.54851772                                           | 0.008887295 | 0.064429245 | SFXN4  |
| 10                                  | 119140767                                             | 119165667   | - 1868      |        |
| protein_coding                      | sideroflexin 4 [Source:HGNC Symbol;Acc:HGNC:16088]    |             |             |        |
| -                                   | 402 459                                               | 311 585     | 409 676     |        |
| 10.53847731                         | 11.64292914                                           | 10.35834481 | 17.40167438 |        |
| 13.45841129                         | 16.82677324                                           |             |             |        |
| ENSG00000119523                     | 518.0403016                                           | 602.6816993 | 553.3460253 |        |
| 736.5735999                         | 757.9505739                                           | 821.2323711 | 558.0226754 |        |
| 771.9188483                         | -0.468335628                                          | 0.00890367  | 0.064521516 | ALG2   |
| 9                                   | 99216426                                              | 99221956    | - 2983      |        |
| protein_coding                      | "ALG2, alpha-1,3/1,6-mannosyltransferase [Source:HGNC |             |             |        |
| Symbol;Acc:HGNC:23159]"             | -                                                     | 571 681     | 476 711     | 664    |
| 952                                 | 9.373710541                                           | 10.8173355  | 9.927972053 |        |
| 13.24428114                         | 13.68239696                                           | 14.83934436 |             |        |
| ENSG00000166135                     | 1421.662264                                           | 1464.666978 | 1256.653474 |        |
| 1818.124709                         | 1761.321891                                           | 1796.014492 | 1380.994239 |        |
| 1791.820364                         | -0.375192928                                          | 0.008910613 | 0.064545387 | HIF1AN |
| 10                                  | 100529072                                             | 100559998   | + 13950     |        |
| protein_coding                      | hypoxia inducible factor 1 subunit alpha inhibitor    |             |             |        |
| [Source:HGNC Symbol;Acc:HGNC:17113] | -                                                     |             | 1567 1655   | 1081   |
| 1755                                | 1543 2082                                             | 5.500769822 | 5.621474323 |        |
| 4.821235358                         | 6.990608116                                           | 6.798906656 | 6.939649493 |        |
| ENSG00000037241                     | 563.4028499                                           | 584.0968011 | 538.2336339 |        |
| 422.6751459                         | 393.8146807                                           | 363.1710381 | 561.9110949 |        |
| 393.2202882                         | 0.515944323                                           | 0.0089398   | 0.064730296 |        |
| RPL26L1 5                           | 172958729                                             | 172969771   | + 1164      |        |
| protein_coding                      | ribosomal protein L26 like 1 [Source:HGNC             |             |             |        |
| Symbol;Acc:HGNC:17050]              | -                                                     | 621 660     | 463 408     | 345    |
| 421                                 | 26.12566197                                           | 26.86688993 | 24.74770083 |        |
| 19.47687273                         | 18.21853599                                           | 16.81744955 |             |        |
| ENSG00000140104                     | 282.1550504                                           | 339.8381388 | 240.6357715 |        |
| 475.5095392                         | 404.0881072                                           | 438.220635  | 287.5429869 |        |

|                                            |                                                     |             |                          |                     |
|--------------------------------------------|-----------------------------------------------------|-------------|--------------------------|---------------------|
| 439.2727604                                | -0.609660052                                        | 0.008953452 | 0.064802624              | CLBA1               |
| 14                                         | 104985775                                           | 105010482   | + 5225                   |                     |
| protein_coding                             | clathrin binding box of aftiphilin containing 1     |             |                          |                     |
| [Source:HGNC Symbol;Acc:HGNC:20126]        | -                                                   | 311         | 384                      | 207                 |
| 459                                        | 354                                                 | 508         | 2.914759845              | 3.482341596         |
| 2.464852282                                | 4.881332984                                         | 4.16451401  | 4.520728605              |                     |
| ENSG00000167674                            | 1617.628472                                         | 2016.018959 | 2370.320474              |                     |
| 1311.536115                                | 1510.193689                                         | 1576.041536 | 2001.322635              |                     |
| 1465.92378                                 | 0.448458621                                         | 0.008962313 | 0.064840226              | HDGFL2              |
| 19                                         | 4472287                                             | 4502211 +   | 4299                     | protein_coding HDGF |
| like 2 [Source:HGNC Symbol;Acc:HGNC:14680] | -                                                   | 1783        | 2278                     |                     |
| 2039                                       | 1266                                                | 1323        | 1827                     | 20.31012431         |
| 29.50914506                                | 16.36357925                                         | 18.91645533 | 19.76069069              |                     |
| ENSG00000172379                            | 995.2543097                                         | 990.3095763 | 1200.853874              |                     |
| 909.5803385                                | 700.8759825                                         | 653.8803963 | 1062.139253              |                     |
| 754.7789058                                | 0.492618548                                         | 0.00896618  | 0.064841682              | ARNT2               |
| 15                                         | 80404350                                            | 80597937    | + 7741                   |                     |
| protein_coding                             | aryl hydrocarbon receptor nuclear translocator 2    |             |                          |                     |
| [Source:HGNC Symbol;Acc:HGNC:16876]        | bHLH                                                | 1097        | 1119                     | 1033                |
| 878                                        | 614                                                 | 758         | 6.939660806              | 6.849509303         |
| 8.302523254                                | 6.302451207                                         | 4.875494422 | 4.553057723              |                     |
| ENSG00000253986                            | 8.165258694                                         | 13.2749273  | 5.812458249              | 0                   |
| 0                                          | 0                                                   | 9.084214747 | 0                        | 5.618702341         |
| 0.008985252                                | 0.064934052                                         | AC104561.3  | 8                        | 23493009            |
| 23494198                                   | -                                                   | 715         | lincRNA novel transcript |                     |
| -                                          | 9                                                   | 15          | 5                        | 0                   |
| 0.616403578                                | 0.994057847                                         | 0.435081692 | 0                        | 0                   |
| ENSG00000172728                            | 206.8532202                                         | 167.2640839 | 159.261356               |                     |
| 253.8122813                                | 308.2027936                                         | 307.0995001 | 177.7928867              |                     |
| 289.7048583                                | -0.703243087                                        | 0.008986294 | 0.064934052              | FUT10               |
| 8                                          | 33370824                                            | 33473422    | -                        | 5606                |
| protein_coding                             | fucosyltransferase 10 [Source:HGNC                  |             |                          |                     |
| Symbol;Acc:HGNC:19234]                     | -                                                   | 228         | 189                      | 137                 |
| 356                                        | 1.991638152                                         | 1.597478977 | 1.520457623              | 270                 |
| 2.428426898                                | 2.960452048                                         | 2.952758461 |                          |                     |
| ENSG00000071082                            | 6554.888229                                         | 9264.129263 | 8674.512691              |                     |
| 9125.846472                                | 11422.90872                                         | 12077.80927 | 8164.510061              |                     |
| 10875.52149                                | -0.413722568                                        | 0.008990759 | 0.064939783              | RPL31               |
| 2                                          | 101001715                                           | 101024032   | + 5791                   |                     |
| protein_coding                             | ribosomal protein L31 [Source:HGNC                  |             |                          |                     |
| Symbol;Acc:HGNC:10334]                     | -                                                   | 7225        | 10468                    | 7462                |
| 14001                                      | 61.09602707                                         | 85.65181886 | 80.16938027              | 8809                |
| 84.52498234                                | 106.2178961                                         | 112.4181693 |                          |                     |
| ENSG00000261423                            | 5.443505796                                         | 14.15992245 | 15.11239145              | 0                   |
| 1.141491828                                | 0                                                   | 11.5719399  | 0.380497276              |                     |
| 5.002063875                                | 0.009008934                                         | 0.065044502 | TMEM202-AS1              | 15                  |
| 72407778                                   | 72475168                                            | -           | 2713                     | lincRNA             |
| TMEM202                                    | antisense RNA 1 [Source:HGNC Symbol;Acc:HGNC:53265] |             |                          | -                   |
| 6                                          | 16                                                  | 13          | 0                        | 1                   |
| 0.279445184                                | 0.298126379                                         | 0           | 0.022656748              | 0.10830042          |

|                                     |                                                        |            |                |      |                       |             |
|-------------------------------------|--------------------------------------------------------|------------|----------------|------|-----------------------|-------------|
| ENSG00000100129                     | 3935.65469                                             |            | 3266.51711     |      | 3719.97328            |             |
| 4541.685882                         | 4674.409036                                            |            | 4569.399023    |      | 3640.715027           |             |
| 4595.164647                         | -0.335956964                                           |            | 0.009014672    |      | 0.065059378           | EIF3L       |
| 22                                  | 37848868                                               |            | 37889407       |      | + 4296                |             |
| protein_coding                      | eukaryotic translation initiation factor 3 subunit L   |            |                |      |                       |             |
| [Source:HGNC Symbol;Acc:HGNC:18138] |                                                        |            | -              |      | 4338 3691             | 3200        |
| 4384                                | 4095 5297                                              |            | 49.44859525    |      | 40.71047909           |             |
| 46.34389721                         | 56.70460329                                            |            | 58.5918207     |      | 57.33195065           |             |
| ENSG00000069431                     | 208.6677222                                            |            | 192.9289434    |      | 96.48680694           |             |
| 330.4739499                         | 240.8547757                                            |            | 330.3907543    |      | 166.0278242           |             |
| 300.57316                           | -0.85304889                                            |            | 0.009025022    |      | 0.065107513           | ABCC9       |
| 12                                  | 21797401                                               |            | 21942529       |      | - 11616               |             |
| protein_coding                      | ATP binding cassette subfamily C member 9 [Source:HGNC |            |                |      |                       |             |
| Symbol;Acc:HGNC:60]                 |                                                        |            | -              |      | 230 218               | 83 319 211  |
| 383                                 | 0.969616319                                            |            | 0.889255031    |      | 0.444557903           |             |
| 1.525970449                         | 1.116537238                                            |            | 1.533109549    |      |                       |             |
| ENSG00000146411                     | 10.88701159                                            |            | 7.964956378    |      | 8.137441549           | 0           |
| 0                                   | 0                                                      | 8.99646984 | 0              |      | 5.602934441           |             |
| 0.009037675                         | 0.065172211                                            |            | SLC2A12 6      |      | 133988697             |             |
| 134052636                           | -                                                      | 4468       | protein_coding |      | solute carrier family |             |
| 2 member 12                         | [Source:HGNC Symbol;Acc:HGNC:18067]                    |            |                |      |                       |             |
|                                     |                                                        |            | -              |      | 12                    | 9           |
| 7                                   | 0                                                      | 0          | 0              |      | 0.131521504           | 0.095445572 |
| 0.097474658                         | 0                                                      | 0          | 0              |      |                       |             |
| ENSG00000284693                     | 20.86677222                                            |            | 38.93978674    |      | 23.249833             | 0           |
| 1.141491828                         | 8.626390453                                            |            | 27.68546398    |      | 3.25596076            |             |
| 3.043229764                         | 0.009043943                                            |            | 0.065190836    |      | AL928921.2            |             |
| 1                                   | 9425094                                                | 9440564    | -              | 2623 | lincRNA               |             |
| uncharacterized                     | LOC100506022 [Source:NCBI gene;Acc:100506022]          |            |                |      |                       |             |
|                                     |                                                        |            |                |      | -                     |             |
| 23                                  | 44                                                     | 20         | 0              | 1    | 10                    | 0.429396232 |
| 0.794842035                         | 0.474393305                                            |            | 0              |      | 0.023434143           |             |
| 0.177268973                         |                                                        |            |                |      |                       |             |
| ENSG00000111667                     | 2136.576025                                            |            | 2449.666584    |      | 2445.882431           |             |
| 1839.880047                         | 1860.63168                                             |            | 1790.838658    |      | 2344.04168            |             |
| 1830.450128                         | 0.356752584                                            |            | 0.009050468    |      | 0.065211294           | USP5        |
| 12                                  | 6852128                                                | 6866632    | +              | 3738 | protein_coding        |             |
| ubiquitin specific peptidase 5      | [Source:HGNC Symbol;Acc:HGNC:12628]                    |            |                |      |                       |             |
|                                     |                                                        |            |                |      | -                     | 2355 2768   |
|                                     |                                                        |            | 2104           | 1776 | 1630                  | 2076        |
| 30.85178513                         | 35.08756495                                            |            | 35.01976965    |      | 26.40071617           |             |
| 26.80375673                         | 25.82373582                                            |            |                |      |                       |             |
| ENSG00000167083                     | 49.89880313                                            |            | 23.89486913    |      | 36.03724115           | 0           |
| 0                                   | 12.93958568                                            |            | 36.61030447    |      | 4.313195226           |             |
| 3.040216938                         | 0.009103847                                            |            | 0.065569199    |      | GNGT2 17              |             |
| 49202791                            | 49210574                                               |            | -              | 1689 | protein_coding G      |             |
| protein subunit                     | gamma transducin 2 [Source:HGNC Symbol;Acc:HGNC:4412]  |            |                |      |                       |             |
|                                     |                                                        |            |                |      | -                     | 55 27       |
|                                     |                                                        |            | 31             | 0    | 0                     | 15          |
| 1.594636584                         | 0.757461486                                            |            | 1.141928444    |      | 0                     | 0           |
| 0.412945395                         |                                                        |            |                |      |                       |             |
| ENSG00000173511                     | 1416.218758                                            |            | 1681.490791    |      | 1442.652138           |             |
| 1977.663857                         | 1878.895549                                            |            | 2046.179815    |      | 1513.453895           |             |
| 1967.57974                          | -0.378466906                                           |            | 0.009117235    |      | 0.065638899           | VEGFB       |

|                                      |                                                     |             |                |                  |             |
|--------------------------------------|-----------------------------------------------------|-------------|----------------|------------------|-------------|
| 11                                   | 64234538                                            | 64238793    | +              | 1545             |             |
| protein_coding                       | vascular endothelial growth factor B [Source:HGNC   |             |                |                  |             |
| Symbol;Acc:HGNC:12681]               | -                                                   | 1561        | 1900           | 1241             | 1909 1646   |
| 2372                                 | 49.47697086                                         | 58.27087748 |                | 49.97469409      |             |
| 68.65773756                          | 65.48603672                                         | 71.38668567 |                |                  |             |
| ENSG00000100311                      | 6.350756762                                         | 7.964956378 |                | 12.78740815      | 0           |
| 0                                    | 0                                                   | 9.034373763 | 0              | 5.606094678      |             |
| 0.00913731                           | 0.065736184                                         | PDGFB       | 22             | 39223359         |             |
| 39244751                             | -                                                   | 3761        | protein_coding | platelet derived |             |
| growth factor subunit B [Source:HGNC | Symbol;Acc:HGNC:8800]                               |             |                |                  |             |
| 7                                    | 9                                                   | 11          | 0              | 0                | 0.091143015 |
| 0.113387614                          | 0.181968493                                         | 0           | 0              | 0                |             |
| ENSG00000253719                      | 1516.016364                                         | 1526.616639 |                | 1528.67652       |             |
| 1664.801371                          | 2219.060114                                         | 2187.652619 |                | 1523.769841      |             |
| 2023.838035                          | -0.409515587                                        | 0.009138181 |                | 0.065736184      |             |
| ATXN7L3B                             | 12                                                  | 74537827    | 74545430       | +                | 7604        |
| protein_coding                       | ataxin 7 like 3B [Source:HGNC                       |             |                |                  |             |
| Symbol;Acc:HGNC:37931]               | -                                                   | 1671        | 1725           | 1315             | 1607 1944   |
| 2536                                 | 10.76125754                                         | 10.74913289 |                | 10.75946039      |             |
| 11.74318255                          | 15.7145342                                          | 15.50737036 |                |                  |             |
| ENSG00000162804                      | 396.4686721                                         | 256.6485944 |                | 340.6100534      |             |
| 208.2296675                          | 192.912119                                          | 32.78028372 |                | 331.24244        |             |
| 144.6406901                          | 1.198961817                                         | 0.009153456 |                | 0.065819301      | SNED1       |
| 2                                    | 240998838                                           | 241095568   | +              | 13592            |             |
| protein_coding                       | "sushi, nidogen and EGF like domains 1 [Source:HGNC |             |                |                  |             |
| Symbol;Acc:HGNC:24696]"              | -                                                   | 437         | 290            | 293              | 201 169     |
| 38                                   | 1.574442319                                         | 1.010976529 |                | 1.341192453      |             |
| 0.821721661                          | 0.764276839                                         | 0.129996377 |                |                  |             |
| ENSG00000169019                      | 855.5376609                                         | 854.9053179 |                | 749.8071142      |             |
| 556.3150818                          | 630.1034892                                         | 603.8473317 |                | 820.0833643      |             |
| 596.7553009                          | 0.459365302                                         | 0.009164196 |                | 0.065869753      | COMMD8      |
| 4                                    | 47450796                                            | 47463719    | -              | 1766             |             |
| protein_coding                       | COMM domain containing 8 [Source:HGNC               |             |                |                  |             |
| Symbol;Acc:HGNC:26036]               | -                                                   | 943         | 966            | 645              | 537 552     |
| 700                                  | 26.14867438                                         | 25.9186793  |                | 22.72353335      |             |
| 16.89645633                          | 19.21302459                                         | 18.43055269 |                |                  |             |
| ENSG00000122406                      | 19641.98341                                         | 21669.10632 |                | 24253.06329      |             |
| 28675.60794                          | 27177.77894                                         | 26066.36403 |                | 21854.71768      |             |
| 27306.58364                          | -0.321348869                                        | 0.009194438 |                | 0.066049359      | RPL5        |
| 1                                    | 92831983                                            | 92841924    | +              | 3717             |             |
| protein_coding                       | ribosomal protein L5 [Source:HGNC                   |             |                |                  |             |
| Symbol;Acc:HGNC:10360]               | -                                                   | 21650       | 24485          | 20863            | 27680 23809 |
| 30217                                | 285.2292258                                         | 312.1289045 |                | 349.2135154      |             |
| 413.7953141                          | 393.7276857                                         | 377.9982608 |                |                  |             |
| ENSG00000198055                      | 873.6826802                                         | 946.0598187 |                | 914.8809285      |             |
| 1063.939644                          | 1366.365718                                         | 1255.139811 |                | 911.5411425      |             |
| 1228.481724                          | -0.430338929                                        | 0.009196652 |                | 0.066049359      | GRK6        |
| 5                                    | 177403204                                           | 177442901   | +              | 4355             |             |
| protein_coding                       | G protein-coupled receptor kinase 6 [Source:HGNC    |             |                |                  |             |
| Symbol;Acc:HGNC:4545]                | -                                                   | 963         | 1069           | 787              | 1027 1197   |



|                        |                                                  |                       |             |                |
|------------------------|--------------------------------------------------|-----------------------|-------------|----------------|
| 1455                   | 10.82846286                                      | 11.63097137           | 11.24329018 |                |
| 13.10371165            | 16.89481153                                      | 15.53480664           |             |                |
| ENSG00000104524        | 498.9880313                                      | 673.4813115           | 547.5335671 |                |
| 616.4012545            | 880.0901995                                      | 1112.804368           | 573.3343033 |                |
| 869.7652741            | -0.601602891                                     | 0.009206701           | 0.066094694 | PYCR3          |
| 8                      | 143603913                                        | 143609773             | - 3244      |                |
| protein_coding         | pyrroline-5-carboxylate reductase 3 [Source:HGNC |                       |             |                |
| Symbol;Acc:HGNC:25846] | -                                                | 550 761               | 471 595     | 771            |
| 1290                   | 8.302531414                                      | 11.11553197           | 9.033309872 |                |
| 10.19173596            | 14.60901358                                      | 18.49012652           |             |                |
| ENSG00000227124        | 103.4266101                                      | 117.7043554           | 82.53690714 |                |
| 171.9707702            | 218.0249392                                      | 166.4893357           | 101.2226242 |                |
| 185.495015             | -0.869763294                                     | 0.00921325            | 0.066114879 | ZNF717         |
| 3                      | 75678660                                         | 75785583              | - 7641      |                |
| protein_coding         | zinc finger protein 717 [Source:HGNC             |                       |             |                |
| Symbol;Acc:HGNC:29448] | zf-C2H2                                          | 114 133               | 71 166      | 191            |
| 193                    | 0.730606169                                      | 0.824760555           | 0.578116009 |                |
| 1.207174164            | 1.536492794                                      | 1.174459722           |             |                |
| ENSG00000132031        | 57.15681086                                      | 18.58489822           | 54.63710754 |                |
| 13.46759043            | 9.131934625                                      | 0 43.45960554         | 7.53317502  |                |
|                        | 2.544343521                                      | 0.009218908           | 0.066128658 | MATN3 2        |
|                        | 19992111                                         | 20012694              | - 3118      | protein_coding |
|                        | matrilin 3 [Source:HGNC                          | Symbol;Acc:HGNC:6909] | -           | 63             |
|                        | 21 47 13                                         | 8 0                   | 0.989448335 |                |
| 0.319131464            | 0.937839658                                      | 0.23167506            | 0.157710728 | 0              |
| ENSG00000128272        | 4149.765918                                      | 5749.81351            | 5282.362057 |                |
| 5909.164295            | 6240.535825                                      | 8360.697627           | 5060.647162 |                |
| 6836.799249            | -0.434205942                                     | 0.009233129           | 0.066187844 | ATF4           |
| 22                     | 39519695                                         | 39522685              | + 2514      |                |
| protein_coding         | activating transcription factor 4 [Source:HGNC   |                       |             |                |
| Symbol;Acc:HGNC:786]   | TF_bZIP                                          | 4574 6497             | 4544 5704   | 5467           |
| 9692                   | 89.09627979                                      | 122.4542984           | 112.4552916 |                |
| 126.0742192            | 133.6691421                                      | 179.2582491           |             |                |
| ENSG00000155367        | 8.165258694                                      | 6.194966072           | 17.43737475 |                |
| 25.89921237            | 62.78205055                                      | 39.68139608           | 10.59919984 |                |
| 42.787553              | -2.028209831                                     | 0.009234643           | 0.066187844 | PPM1J          |
| 1                      | 112709994                                        | 112715477             | - 2874      |                |
| protein_coding         | "protein phosphatase, Mg2+/Mn2+                  | dependent 1J          |             |                |
| [Source:HGNC           | Symbol;Acc:HGNC:20785]"                          | -                     | 9 7         | 15             |
| 25                     | 55 46                                            | 0.153350229           | 0.115408479 |                |
| 0.324721722            | 0.483353968                                      | 1.176314054           | 0.744221284 |                |
| ENSG00000186716        | 883.6624409                                      | 833.6654342           | 785.8443553 |                |
| 910.616307             | 1238.518634                                      | 1356.931218           | 834.3907435 |                |
| 1168.68872             | -0.486118032                                     | 0.009244777           | 0.066218059 | BCR            |
| 22                     | 23179704                                         | 23318037              | + 12389     |                |
| protein_coding         | "BCR, RhoGEF and GTPase activating protein       |                       |             |                |
| [Source:HGNC           | Symbol;Acc:HGNC:1014]"                           | -                     | 974 942     | 676            |
| 879                    | 1085 1573                                        | 3.849917184           | 3.60280777  |                |
| 3.394824202            | 3.942436126                                      | 5.383204092           | 5.903689225 |                |
| ENSG00000157426        | 221.3692357                                      | 213.2838319           | 182.511189  |                |

|                                     |                                                      |                |                 |        |
|-------------------------------------|------------------------------------------------------|----------------|-----------------|--------|
| 315.9703909                         | 350.4379912                                          | 302.7863049    | 205.7214189     |        |
| 323.0648957                         | -0.64896072                                          | 0.009246346    | 0.066218059     | AASDH  |
| 4                                   | 56338287                                             | 56387508       | - 4654          |        |
| protein_coding                      | aminoadipate-semialdehyde dehydrogenase [Source:HGNC |                |                 |        |
| Symbol;Acc:HGNC:23993]              | -                                                    | 244 241        | 157 305         | 307    |
| 351                                 | 2.567391689                                          | 2.453675375    | 2.098843806     |        |
| 3.641543516                         | 4.054705879                                          | 3.506806119    |                 |        |
| ENSG00000162736                     | 1966.012843                                          | 1782.380238    | 2294.758517     |        |
| 1545.664994                         | 1624.342871                                          | 1405.239005    | 2014.383866     |        |
| 1525.08229                          | 0.40129484                                           | 0.009278327    | 0.066420202     | NCSTN  |
| 1                                   | 160343272                                            | 160358952      | + 4175          |        |
| protein_coding                      | nicastrin [Source:HGNC Symbol;Acc:HGNC:17091]        |                |                 | -      |
| 2167                                | 2014 1974                                            | 1492 1423      | 1629 25.4173995 |        |
| 22.85753678                         | 29.41694138                                          | 19.85749158    | 20.95056697     |        |
| 18.14243696                         |                                                      |                |                 |        |
| ENSG00000139117                     | 523.4838074                                          | 394.7078383    | 397.5721443     |        |
| 385.3802801                         | 204.3270372                                          | 136.2969692    | 438.58793       |        |
| 242.0014288                         | 0.859650655                                          | 0.009284843    | 0.066439962     | CPNE8  |
| 12                                  | 38646822                                             | 38907430       | - 5178          |        |
| protein_coding                      | copine 8 [Source:HGNC Symbol;Acc:HGNC:23498]         |                |                 | -      |
| 577                                 | 446 342                                              | 372 179        | 158 5.456855462 |        |
| 4.0813069                           | 4.109328939                                          | 3.992022105    | 2.124899259     |        |
| 1.41881594                          |                                                      |                |                 |        |
| ENSG00000196091                     | 0 0                                                  | 0 9.323716454  | 4.565967313     |        |
| 12.93958568                         | 0                                                    | 8.943089815    | -5.639418407    |        |
| 0.009337644                         | 0.066790773                                          | MYBPC1 12      | 101568353       |        |
| 101686018                           | + 7385                                               | protein_coding | "myosin binding |        |
| protein C, slow                     | type [Source:HGNC Symbol;Acc:HGNC:7549]"             |                |                 | -      |
| 0                                   | 0 0                                                  | 9 4            | 15 0            | 0      |
| 0                                   | 0.067717989                                          | 0.033293301    | 0.094443436     |        |
| ENSG00000105732                     | 736.6877844                                          | 998.2745327    | 936.9682698     |        |
| 991.4218496                         | 1373.214669                                          | 1425.942342    | 890.643529      |        |
| 1263.526287                         | -0.504929462                                         | 0.009368252    | 0.066961596     | ZNF574 |
| 19                                  | 42068477                                             | 42081549       | + 4666          |        |
| protein_coding                      | zinc finger protein 574 [Source:HGNC                 |                |                 |        |
| Symbol;Acc:HGNC:26166]              | zf-C2H2                                              | 812 1128       | 806 957         | 1203   |
| 1653                                | 8.521969555                                          | 11.45488691    | 10.74724511     |        |
| 11.39670343                         | 15.84777341                                          | 16.47248563    |                 |        |
| ENSG00000105058                     | 2427.803585                                          | 3026.683424    | 2599.331329     |        |
| 3032.279785                         | 3510.087372                                          | 4111.33769     | 2684.606113     |        |
| 3551.234949                         | -0.403721353                                         | 0.009369097    | 0.066961596     | FAM32A |
| 19                                  | 16185380                                             | 16192046       | + 1921          |        |
| protein_coding                      | family with sequence similarity 32 member A          |                |                 |        |
| [Source:HGNC Symbol;Acc:HGNC:24563] | -                                                    | 2676 3420      | 2236            |        |
| 2927                                | 3075 4766                                            | 68.216185      | 84.35778775     |        |
| 72.4187928                          | 84.66568008                                          | 98.39320686    | 115.3606492     |        |
| ENSG00000113916                     | 525.2983093                                          | 580.5568204    | 696.3324983     |        |
| 703.422608                          | 980.5414804                                          | 901.4578023    | 600.7292093     |        |
| 861.8072969                         | -0.521651452                                         | 0.009396129    | 0.067127678     | BCL6   |
| 3                                   | 187721377                                            | 187745727      | - 5938          |        |

|                                     |                                                    |             |             |             |      |        |  |
|-------------------------------------|----------------------------------------------------|-------------|-------------|-------------|------|--------|--|
| protein_coding                      | B cell CLL/lymphoma 6 [Source:HGNC                 |             |             |             |      |        |  |
| Symbol;Acc:HGNC:1001]               | ZBTB                                               | 579         | 656         | 599         | 679  | 859    |  |
| 1045                                | 4.774930492                                        | 5.234679384 | 6.276152328 |             |      |        |  |
| 6.353918276                         | 8.892017951                                        | 8.182897578 |             |             |      |        |  |
| ENSG00000105810                     | 3375.880844                                        | 2597.460774 | 2684.19322  |             |      |        |  |
| 2526.727159                         | 2107.193915                                        | 1708.02531  | 2885.844946 |             |      |        |  |
| 2113.982128                         | 0.449498015                                        | 0.009413006 | 0.0672211   |             |      | CDK6   |  |
| 7                                   | 92604921                                           | 92836594    | -           | 12260       |      |        |  |
| protein_coding                      | cyclin dependent kinase 6 [Source:HGNC             |             |             |             |      |        |  |
| Symbol;Acc:HGNC:1777]               | -                                                  | 3721        | 2935        | 2309        | 2439 | 1846   |  |
| 1980                                | 14.86270587                                        | 11.34342166 | 11.71764427 |             |      |        |  |
| 11.05435414                         | 9.255259215                                        | 7.509408644 |             |             |      |        |  |
| ENSG00000120327                     | 49.89880313                                        | 100.0044523 | 104.6242485 |             |      |        |  |
| 210.3016045                         | 143.8279703                                        | 159.5882234 | 84.84250131 |             |      |        |  |
| 171.2392661                         | -1.016035153                                       | 0.0094262   | 0.067288156 |             |      |        |  |
| PCDHB14 5                           | 141222932                                          | 141227759   | +           | 4828        |      |        |  |
| protein_coding                      | protocadherin beta 14 [Source:HGNC                 |             |             |             |      |        |  |
| Symbol;Acc:HGNC:8685]               | -                                                  | 55          | 113         | 90          | 203  | 126    |  |
| 185                                 | 0.557858573                                        | 1.109015517 | 1.159797303 |             |      |        |  |
| 2.336365691                         | 1.604170937                                        | 1.781703713 |             |             |      |        |  |
| ENSG00000186684                     | 168.7486797                                        | 171.6890597 | 283.6479626 |             |      |        |  |
| 106.704755                          | 67.34801786                                        | 141.4728034 | 208.0285673 |             |      |        |  |
| 105.1751921                         | 0.977489498                                        | 0.009436853 | 0.067337029 |             |      |        |  |
| CYP27C1 2                           | 127184120                                          | 127220078   | -           | 4491        |      |        |  |
| protein_coding                      | cytochrome P450 family 27 subfamily C member 1     |             |             |             |      |        |  |
| [Source:HGNC Symbol;Acc:HGNC:33480] | -                                                  |             | 186         | 194         | 244  |        |  |
| 103                                 | 59                                                 | 164         | 2.028142999 | 2.046845751 |      |        |  |
| 3.380287332                         | 1.274401322                                        | 0.807525633 | 1.697977031 |             |      |        |  |
| ENSG00000143621                     | 6193.802345                                        | 6863.137412 | 7422.509185 |             |      |        |  |
| 5009.943641                         | 5957.445851                                        | 5162.032047 | 6826.482981 |             |      |        |  |
| 5376.473847                         | 0.344487748                                        | 0.009442787 | 0.067352202 |             |      | ILF2   |  |
| 1                                   | 153661788                                          | 153671048   | -           | 2281        |      |        |  |
| protein_coding                      | interleukin enhancer binding factor 2 [Source:HGNC |             |             |             |      |        |  |
| Symbol;Acc:HGNC:6037]               | -                                                  | 6827        | 7755        | 6385        | 4836 | 5219   |  |
| 5984                                | 146.5660222                                        | 161.0953326 | 174.1576127 |             |      |        |  |
| 117.80753                           | 140.6401665                                        | 121.9824404 |             |             |      |        |  |
| ENSG00000253598                     | 14.51601546                                        | 26.54985459 | 13.9498998  |             |      |        |  |
| 79.76957411                         | 75.33846066                                        | 27.60444945 | 18.33858995 |             |      |        |  |
| 60.90416141                         | -1.723017429                                       | 0.009449841 | 0.067365314 |             |      |        |  |
| SLC10A5 8                           | 81693607                                           | 81696174    | -           | 2568        |      |        |  |
| protein_coding                      | solute carrier family 10 member 5 [Source:HGNC     |             |             |             |      |        |  |
| Symbol;Acc:HGNC:22981]              | -                                                  | 16          | 30          | 12          | 77   | 66     |  |
| 32                                  | 0.305108036                                        | 0.553544674 | 0.290732159 |             |      |        |  |
| 1.666125646                         | 1.579778781                                        | 0.579409988 |             |             |      |        |  |
| ENSG00000104998                     | 118.8498765                                        | 130.9792827 | 137.1740147 |             |      |        |  |
| 161.6110852                         | 285.372957                                         | 241.5389327 | 129.001058  |             |      |        |  |
| 229.5076583                         | -0.831460462                                       | 0.009452242 | 0.067365314 |             |      | IL27RA |  |
| 19                                  | 14031748                                           | 14053216    | +           | 2962        |      |        |  |
| protein_coding                      | interleukin 27 receptor subunit alpha [Source:HGNC |             |             |             |      |        |  |
| Symbol;Acc:HGNC:17290]              | -                                                  | 131         | 148         | 118         | 156  | 250    |  |

|                                                             |                                                                                               |             |                |                        |             |
|-------------------------------------------------------------|-----------------------------------------------------------------------------------------------|-------------|----------------|------------------------|-------------|
| 280                                                         | 2.165782923                                                                                   | 2.367571492 | 2.478584901    |                        |             |
| 2.926520616                                                 | 5.18802804                                                                                    | 4.39545659  |                |                        |             |
| ENSG00000111674                                             | 1715.611577                                                                                   | 2399.22186  | 2874.84185     |                        |             |
| 2683.158402                                                 | 3496.38947                                                                                    | 3640.336771 | 2329.891762    |                        |             |
| 3273.294881                                                 | -0.491021616                                                                                  | 0.009456098 | 0.067365653    | EN02                   |             |
| 12                                                          | 6913745                                                                                       | 6923698 +   | 4281           | protein_coding         |             |
| enolase 2 [Source:HGNC Symbol;Acc:HGNC:3353]                |                                                                                               |             | -              | 1891                   | 2711        |
| 2473                                                        | 2590                                                                                          | 3063        | 4220           | 21.63091967            | 30.00618141 |
| 35.9406341                                                  | 33.61759028                                                                                   | 43.97938269 | 45.83510613    |                        |             |
| ENSG00000188015                                             | 68.95107341                                                                                   | 73.45459771 | 124.3866065    |                        |             |
| 25.89921237                                                 | 52.5086241                                                                                    | 23.29125422 | 88.93075922    |                        |             |
| 33.8996969                                                  | 1.395883739                                                                                   | 0.009464127 | 0.067395706    | S100A3                 |             |
| 1                                                           | 153547329                                                                                     | 153549372   | -              | 955                    |             |
| protein_coding                                              | S100 calcium binding protein A3 [Source:HGNC Symbol;Acc:HGNC:10493]                           | -           | 76             | 83                     | 107         |
| 27                                                          | 3.897076259                                                                                   | 4.11814052  | 6.970874319    | 25                     | 46          |
| 1.454617073                                                 | 2.960750561                                                                                   | 1.314593288 |                |                        |             |
| ENSG00000247157                                             | 4.53625483                                                                                    | 9.734946684 | 12.78740815    | 0                      |             |
| 0                                                           | 0                                                                                             | 9.019536554 | 0              | 5.603838262            |             |
| 0.009537184                                                 | 0.067888631                                                                                   | LINC01252   | 12             | 11548030               |             |
| 11590369                                                    | +                                                                                             | 3793        | lincRNA        | long intergenic non-   |             |
| protein coding RNA 1252 [Source:HGNC Symbol;Acc:HGNC:27888] |                                                                                               |             |                |                        | -           |
| 5                                                           | 11                                                                                            | 11          | 0              | 0                      | 0.064552913 |
| 0.137415677                                                 | 0.180433299                                                                                   | 0           | 0              | 0                      |             |
| ENSG00000107186                                             | 986.1818                                                                                      | 798.2656281 | 919.5308951    |                        |             |
| 734.5016629                                                 | 644.9428829                                                                                   | 548.6384328 | 901.3261077    |                        |             |
| 642.6943262                                                 | 0.488505509                                                                                   | 0.009547634 | 0.067912158    | MPDZ                   |             |
| 9                                                           | 13105704                                                                                      | 13279590    | -              | 11273                  |             |
| protein_coding                                              | multiple PDZ domain crumbs cell polarity complex component [Source:HGNC Symbol;Acc:HGNC:7208] |             | -              | 1087                   | 902         |
| 791                                                         | 709                                                                                           | 565         | 636            | 4.721921041            | 3.791346447 |
| 4.365598817                                                 | 3.494771391                                                                                   | 3.080748892 | 2.623304032    |                        |             |
| ENSG00000106538                                             | 2.721752898                                                                                   | 13.2749273  | 11.6249165     | 0                      |             |
| 0                                                           | 0                                                                                             | 9.207198898 | 0              | 5.634641004            |             |
| 0.009548168                                                 | 0.067912158                                                                                   | RARRES2 7   | 150338317      |                        |             |
| 150341674                                                   | -                                                                                             | 1921        | protein_coding | retinoic acid receptor |             |
| responder 2 [Source:HGNC Symbol;Acc:HGNC:9868]              |                                                                                               |             | -              | 3                      | 15          |
| 10                                                          | 0                                                                                             | 0           | 0              | 0.076475544            | 0.369990297 |
| 0.323876533                                                 | 0                                                                                             | 0           | 0              |                        |             |
| ENSG00000006576                                             | 1858.957229                                                                                   | 1499.181789 | 1758.849866    |                        |             |
| 1607.823104                                                 | 1035.333088                                                                                   | 791.9026436 | 1705.662962    |                        |             |
| 1145.019612                                                 | 0.575387916                                                                                   | 0.009563562 | 0.067994314    | PHTF2                  |             |
| 7                                                           | 77798792                                                                                      | 77957503    | +              | 8646                   |             |
| protein_coding                                              | putative homeodomain transcription factor 2 [Source:HGNC Symbol;Acc:HGNC:13411]               |             | -              | 2049                   | 1694        |
| 1552                                                        | 907                                                                                           | 918         | 11.60527433    | 9.283775197            | 1513        |
| 10.88755955                                                 | 9.974440164                                                                                   | 6.448213612 | 4.936947036    |                        |             |
| ENSG00000196843                                             | 429.1297069                                                                                   | 477.8973827 | 419.6594856    |                        |             |
| 472.4016337                                                 | 660.9237685                                                                                   | 926.4743346 | 442.2288584    |                        |             |
| 686.5999123                                                 | -0.635363713                                                                                  | 0.009574005 | 0.068041211    | ARID5A                 |             |

|                                              |                                                       |             |                      |             |             |
|----------------------------------------------|-------------------------------------------------------|-------------|----------------------|-------------|-------------|
| 2                                            | 96536743                                              | 96552638    | +                    | 3565        |             |
| protein_coding                               | AT-rich interaction domain 5A [Source:HGNC            |             |                      |             |             |
| Symbol;Acc:HGNC:17361]                       | ARID                                                  | 473         | 540                  | 361         | 456 579     |
| 1074                                         | 6.497260657                                           | 7.177292844 | 6.300202582          |             |             |
| 7.107507917                                  | 9.983122258                                           | 14.00798814 |                      |             |             |
| ENSG00000106034                              | 420.9644482                                           | 254.8786041 | 284.8104542          |             |             |
| 225.8411319                                  | 151.8184131                                           | 188.0553119 | 320.2178355          |             |             |
| 188.571619                                   | 0.763722086                                           | 0.009586943 | 0.068105796          |             | CPED1       |
| 7                                            | 120988677                                             | 121297444   | +                    | 7705        |             |
| protein_coding                               | cadherin like and PC-esterase domain containing 1     |             |                      |             |             |
| [Source:HGNC Symbol;Acc:HGNC:26159]          | -                                                     |             | 464                  | 288         | 245         |
| 218                                          | 133                                                   | 218         | 2.948994897          | 1.77111306  |             |
| 1.978337066                                  | 1.572156929                                           | 1.061026811 | 1.315572748          |             |             |
| ENSG00000268516                              | 26.31027801                                           | 15.92991276 | 25.5748163           |             |             |
| 42.47470829                                  | 74.19696883                                           | 77.63751407 | 22.60500236          |             |             |
| 64.7697304                                   | -1.522517519                                          | 0.00960629  | 0.068211093          |             |             |
| AC020915.3                                   | 19                                                    | 58257270    | 58278808             | -           | 2708        |
| antisense                                    | uncharacterized LOC105372482 [Source:NCBI             |             |                      |             |             |
| gene;Acc:105372482]                          | -                                                     | 29          | 18                   | 22          | 41 65       |
| 90                                           | 0.524418521                                           | 0.31495629  | 0.505453103          |             |             |
| 0.841292932                                  | 1.475407738                                           | 1.545342923 |                      |             |             |
| ENSG00000230160                              | 0                                                     | 0           | 0                    | 5.179842475 | 13.69790194 |
| 7.763751407                                  | 0                                                     | 8.880498607 | -5.624717826         |             |             |
| 0.00961485                                   | 0.068211093                                           | AC004854.1  | 7                    | 44919669    |             |
| 44920329                                     | +                                                     | 349         | processed_pseudogene |             |             |
| mitochondrial ribosomal protein S23 (MRPS23) | pseudogene -                                          |             |                      |             | 0           |
| 0                                            | 0                                                     | 5           | 12                   | 9           | 0 0 0       |
| 0.796079831                                  | 2.113504512                                           | 1.199079838 |                      |             |             |
| ENSG00000132837                              | 1.814501932                                           | 4.424975766 | 5.812458249          |             |             |
| 21.75533839                                  | 11.41491828                                           | 44.85723035 | 4.017311982          |             |             |
| 26.00916234                                  | -2.714378159                                          | 0.009615732 | 0.068211093          |             | DMGDH       |
| 5                                            | 78997606                                              | 79236038    | -                    | 5254        |             |
| protein_coding                               | dimethylglycine dehydrogenase [Source:HGNC            |             |                      |             |             |
| Symbol;Acc:HGNC:24475]                       | -                                                     | 2           | 5                    | 5           | 21 10       |
| 52                                           | 0.018640974                                           | 0.045092714 | 0.059208871          |             |             |
| 0.222096273                                  | 0.116992303                                           | 0.460197541 |                      |             |             |
| ENSG00000168066                              | 6151.161549                                           | 6992.346705 | 6471.591015          |             |             |
| 6890.22646                                   | 9018.926934                                           | 9572.705485 | 6538.366423          |             |             |
| 8493.95296                                   | -0.377543509                                          | 0.00961719  | 0.068211093          |             | SF1         |
| 11                                           | 64764606                                              | 64778786    | -                    | 5972        |             |
| protein_coding                               | splicing factor 1 [Source:HGNC Symbol;Acc:HGNC:12950] |             |                      |             |             |
| -                                            | 6780                                                  | 7901        | 5567                 | 6651        | 7901 11097  |
| 55.59536404                                  | 62.68861913                                           | 57.99736583 | 61.88411613          |             |             |
| 81.32229436                                  | 86.40060929                                           |             |                      |             |             |
| ENSG00000258648                              | 0                                                     | 0           | 0                    | 12.43162194 | 7.990442797 |
| 6.038473317                                  | 0                                                     | 8.820179351 | -5.615618015         |             |             |
| 0.009630247                                  | 0.068276328                                           | UBE2CP1     | 14                   | 30683045    |             |
| 30683598                                     | -                                                     | 554         | processed_pseudogene |             | ubiquitin   |
| conjugating enzyme E2 C                      | pseudogene 1 [Source:HGNC                             |             |                      |             |             |
| Symbol;Acc:HGNC:19670]                       | -                                                     | 0           | 0                    | 0           | 12 7        |

|                        |                                                        |             |                |                        |             |                |             |
|------------------------|--------------------------------------------------------|-------------|----------------|------------------------|-------------|----------------|-------------|
|                        | 7                                                      | 0           | 0              | 0                      | 1.20360373  | 0.7766684      |             |
|                        | 0.587515452                                            |             |                |                        |             |                |             |
| ENSG0000005194         | 1680.228789                                            |             | 1929.289434    |                        | 1900.673848 |                |             |
| 2090.584423            | 2604.884352                                            |             | 2491.301563    |                        | 1836.73069  |                |             |
| 2395.590112            | -0.383340174                                           |             | 0.009638346    |                        | 0.068289291 |                |             |
| CIAPIN1                | 16                                                     | 57428169    | 57447528       |                        | -           | 3509           |             |
| protein_coding         | cytokine induced apoptosis inhibitor 1 [Source:HGNC    |             |                |                        |             |                |             |
| Symbol;Acc:HGNC:28050] | -                                                      |             | 1852           | 2180                   | 1635        | 2018           | 2282        |
|                        | 2888                                                   | 25.8455809  | 29.43740793    |                        | 28.98953408 |                |             |
| 31.95581052            | 39.97418629                                            |             | 38.26879952    |                        |             |                |             |
| ENSG00000171872        | 5.443505796                                            |             | 9.734946684    |                        | 11.6249165  |                | 0           |
|                        | 0                                                      | 0           | 8.934456326    | 0                      | 5.590805388 |                |             |
| 0.009639796            | 0.068289291                                            |             | KLF17          | 1                      | 44118850    |                |             |
| 44135140               | +                                                      | 3131        | protein_coding | Kruppel like factor 17 |             |                |             |
| [Source:HGNC           | Symbol;Acc:HGNC:18830]                                 |             |                |                        |             |                |             |
|                        |                                                        |             | zf-C2H2        | 6                      | 11          |                | 10          |
|                        | 0                                                      | 0           | 0.093841916    |                        | 0.16647003  |                |             |
| 0.198711856            | 0                                                      | 0           | 0              |                        |             |                |             |
| ENSG00000133110        | 53.52780699                                            |             | 96.46447169    |                        | 38.36222445 |                |             |
| 135.7118728            | 89.0363626                                             |             | 213.9344832    |                        | 62.78483438 |                |             |
| 146.2275729            | -1.217164823                                           |             | 0.009683333    |                        | 0.068570244 |                | POSTN       |
|                        | 13                                                     | 37562583    | 37598844       |                        | -           | 5464           |             |
| protein_coding         | periostin [Source:HGNC Symbol;Acc:HGNC:16953]          |             |                |                        |             |                |             |
|                        | 59                                                     | 109         | 33             | 131                    | 78          | 248            | 0.528773893 |
|                        | 0.945240341                                            | 0.375759609 | 1.332209875    |                        | 0.877467969 |                |             |
|                        | 2.110435134                                            |             |                |                        |             |                |             |
| ENSG00000164828        | 5190.382776                                            |             | 5153.326777    |                        | 5493.935537 |                |             |
| 4868.015958            | 3781.762427                                            |             | 3523.8805      |                        | 5279.21503  |                |             |
| 4057.886295            | 0.379650286                                            |             | 0.009706482    |                        | 0.068687162 |                | SUN1        |
|                        | 7                                                      | 816615      | 896435         | +                      | 11811       | protein_coding | Sad1        |
| and UNC84 domain       | containing 1 [Source:HGNC Symbol;Acc:HGNC:18587]       |             |                |                        |             |                |             |
|                        | -                                                      | 5721        | 5823           | 4726                   | 4699        | 3313           | 4085        |
| 23.71996052            | 23.36073815                                            |             | 24.89510111    |                        | 22.10705131 |                |             |
| 17.24178108            | 16.0818649                                             |             |                |                        |             |                |             |
| ENSG00000139405        | 530.7418151                                            |             | 699.146171     |                        | 634.7204408 |                |             |
| 542.8474913            | 1215.688797                                            |             | 1238.749669    |                        | 621.5361423 |                |             |
| 999.0953191            | -0.685004558                                           |             | 0.009710894    |                        | 0.068687162 |                | RITA1       |
|                        | 12                                                     | 113185526   | 113192368      |                        | +           | 2309           |             |
| protein_coding         | RBPJ interacting and tubulin associated 1 [Source:HGNC |             |                |                        |             |                |             |
| Symbol;Acc:HGNC:25925] | -                                                      |             | 585            | 790                    | 546         | 524            | 1065        |
|                        | 1436                                                   | 12.40682386 | 16.21173885    |                        | 14.71213009 |                |             |
| 12.61012518            | 28.35130376                                            |             | 28.91755199    |                        |             |                |             |
| ENSG00000261801        | 410.0774366                                            |             | 341.6081291    |                        | 453.3717435 |                |             |
| 306.6466745            | 200.9025618                                            |             | 255.3411574    |                        | 401.6857697 |                |             |
| 254.2967979            | 0.65771129                                             |             | 0.009711493    |                        | 0.068687162 |                | LOXL1-      |
| AS1                    | 15                                                     | 73908071    | 73928248       |                        | -           | 4221           |             |
| antisense              | LOXL1 antisense RNA 1 [Source:HGNC                     |             |                |                        |             |                |             |
| Symbol;Acc:HGNC:44169] | -                                                      |             | 452            | 386                    | 390         | 296            | 176         |
|                        | 296                                                    | 5.243868184 | 4.333096822    |                        | 5.748520725 |                |             |
| 3.896623116            | 2.562976805                                            |             | 3.260673974    |                        |             |                |             |
| ENSG00000130332        | 915.4162247                                            |             | 1540.776562    |                        | 1394.98998  |                |             |

|                                                                        |              |             |                          |             |                      |
|------------------------------------------------------------------------|--------------|-------------|--------------------------|-------------|----------------------|
| 578.0704202                                                            | 788.7708533  | 1117.980203 | 1283.727589              |             |                      |
| 828.2738254                                                            | 0.631119719  | 0.009725281 | 0.068757192              | LSM7        |                      |
| 19                                                                     | 2321517      | 2328620     | -                        | 1698        | protein_coding "LSM7 |
| homolog, U6 small nuclear RNA and mRNA degradation associated          |              |             |                          |             |                      |
| [Source:HGNC Symbol;Acc:HGNC:20470]"                                   | -            | 1009        | 1741                     | 1200        |                      |
| 558                                                                    | 691          | 1296        | 29.09927467              | 48.58335764 |                      |
| 43.96938658                                                            | 18.26032726  | 25.01426357 | 35.48937358              |             |                      |
| ENSG00000167130                                                        | 511.6895448  | 500.9072567 | 539.3961256              |             |                      |
| 412.315461                                                             | 335.5985975  | 311.4126953 | 517.3309757              |             |                      |
| 353.1089179                                                            | 0.55127806   | 0.009735223 | 0.068772483              | DOLPP1      |                      |
| 9                                                                      | 129081100    | 129090438   | +                        | 2249        |                      |
| protein_coding dolichyldiphosphatase 1 [Source:HGNC                    |              |             |                          |             |                      |
| Symbol;Acc:HGNC:29565]                                                 | -            | 564         | 566                      | 464         | 398 294              |
| 361                                                                    | 12.28056455  | 11.9248635  | 12.83616739              |             |                      |
| 9.833444258                                                            | 8.035358083  | 7.463607022 |                          |             |                      |
| ENSG00000248428                                                        | 0            | 0           | 0                        | 14.50355893 | 0                    |
| 18.11541995                                                            | 0            | 10.87299296 | -5.921930052             | 0.009736848 |                      |
|                                                                        | 0.068772483  | AC010395.1  | 5                        | 110970951   |                      |
| 111008899                                                              | -            | 697         | lincRNA novel transcript | -           |                      |
| 0                                                                      | 0            | 0           | 14                       | 0           | 21 0 0               |
| 0                                                                      | 1.116110776  | 0           | 1.400933546              |             |                      |
| ENSG00000108953                                                        | 16194.42974  | 15900.70792 | 17131.63944              |             |                      |
| 14488.0194                                                             | 12725.3509   | 12630.7609  | 16408.9257               |             |                      |
| 13281.37707                                                            | 0.305055827  | 0.009739107 | 0.068772483              | YWHAE       |                      |
| 17                                                                     | 1344272      | 1400378     | -                        | 3847        | protein_coding       |
| tyrosine 3-monooxygenase/tryptophan 5-monooxygenase activation protein |              |             |                          |             |                      |
| epsilon [Source:HGNC Symbol;Acc:HGNC:12851]                            | -            | 17850       | 17967                    |             |                      |
| 14737                                                                  | 13985        | 11148       | 14642                    | 227.2190385 | 221.299189           |
| 238.3382487                                                            | 202.0004459  | 178.1238748 | 176.9739052              |             |                      |
| ENSG00000075711                                                        | 2352.501755  | 1898.314603 | 2301.733467              |             |                      |
| 1966.268203                                                            | 1518.184131  | 1244.788142 | 2184.183275              |             |                      |
| 1576.413492                                                            | 0.470709741  | 0.009750194 | 0.0688233                | DLG1        |                      |
| 3                                                                      | 197042560    | 197299300   | -                        | 11001       |                      |
| protein_coding discs large MAGUK scaffold protein 1 [Source:HGNC       |              |             |                          |             |                      |
| Symbol;Acc:HGNC:2900]                                                  | -            | 2593        | 2145                     | 1980        | 1898 1330            |
| 1443                                                                   | 11.54247747  | 9.238927788 | 11.19798476              |             |                      |
| 9.586853417                                                            | 7.431334949  | 6.099092002 |                          |             |                      |
| ENSG00000153982                                                        | 60.78581472  | 44.24975766 | 48.8246493               |             |                      |
| 103.5968495                                                            | 94.74382174  | 131.1211349 | 51.28674056              |             |                      |
| 109.820602                                                             | -1.099552606 | 0.009781005 | 0.069013244              | GDPD1       |                      |
| 17                                                                     | 59220467     | 59275967    | +                        | 2970        |                      |
| protein_coding glycerophosphodiester phosphodiesterase domain          |              |             |                          |             |                      |
| containing 1 [Source:HGNC Symbol;Acc:HGNC:20883]                       | -            |             |                          |             | 67                   |
| 50                                                                     | 42           | 100         | 83                       | 152         | 1.104706824          |
| 0.797700742                                                            | 0.879831867  | 1.870921623 | 1.71778578               |             |                      |
| 2.379677787                                                            |              |             |                          |             |                      |
| ENSG00000143776                                                        | 2052.201685  | 1594.761266 | 1749.549933              |             |                      |
| 1528.05353                                                             | 1333.262455  | 1105.903256 | 1798.837628              |             |                      |
| 1322.406414                                                            | 0.444453336  | 0.00978866  | 0.069039713              |             |                      |
| CDC42BPA                                                               | 1            | 226989865   | 227318474                | -           | 14055                |

|                                     |                                                   |             |                                     |             |       |             |   |  |
|-------------------------------------|---------------------------------------------------|-------------|-------------------------------------|-------------|-------|-------------|---|--|
| protein_coding                      | CDC42 binding protein kinase alpha                |             |                                     |             |       |             |   |  |
| [Source:HGNC Symbol;Acc:HGNC:1737]  | -                                                 | 2262        | 1802                                | 1505        |       |             |   |  |
| 1475                                | 1168                                              | 1282        | 7.881165258                         | 6.075057286 |       |             |   |  |
| 6.662120698                         | 5.831405123                                       | 5.108099556 | 4.241194537                         |             |       |             |   |  |
| ENSG00000117419                     | 1935.16631                                        | 2633.745576 | 2504.007014                         |             |       |             |   |  |
| 2634.467883                         | 3165.35684                                        | 3847.370142 | 2357.639633                         |             |       |             |   |  |
| 3215.731621                         | -0.448174721                                      | 0.009797005 | 0.06906188                          | ERI3        |       |             |   |  |
| 1                                   | 44221070                                          | 44355260    | -                                   | 2785        |       |             |   |  |
| protein_coding                      | ERI1 exoribonuclease family member 3 [Source:HGNC |             |                                     |             |       |             |   |  |
| Symbol;Acc:HGNC:17276]              | -                                                 | 2133        | 2976                                | 2154        | 2543  | 2773        |   |  |
| 4460                                | 37.50544645                                       | 50.63305924 | 48.1201914                          |             |       |             |   |  |
| 50.73798367                         | 61.20290413                                       | 74.46302538 |                                     |             |       |             |   |  |
| ENSG00000148700                     | 700.3977457                                       | 415.0627268 | 442.9093186                         |             |       |             |   |  |
| 331.5099184                         | 318.4762201                                       | 349.3688133 | 519.4565971                         |             |       |             |   |  |
| 333.1183173                         | 0.641242405                                       | 0.009799611 | 0.06906188                          | ADD3        |       |             |   |  |
| 10                                  | 109996368                                         | 110135565   | +                                   | 6541        |       |             |   |  |
| protein_coding                      | adducin 3 [Source:HGNC Symbol;Acc:HGNC:245]       |             |                                     |             |       |             |   |  |
| 772                                 | 469                                               | 381         | 320                                 | 279         | 405   | 5.779653929 |   |  |
| 3.397466119                         | 3.623995695                                       | 2.718428238 | 2.621847422                         |             |       |             |   |  |
| 2.879001507                         |                                                   |             |                                     |             |       |             |   |  |
| ENSG00000081870                     | 613.301653                                        | 596.4867332 | 573.1083834                         |             |       |             |   |  |
| 370.8767212                         | 414.3615336                                       | 464.9624454 | 594.2989232                         |             |       |             |   |  |
| 416.7335667                         | 0.511488498                                       | 0.009804944 | 0.069071317                         | HSPB11      |       |             |   |  |
| 1                                   | 53916574                                          | 53945929    | -                                   | 3236        |       |             |   |  |
| protein_coding                      | heat shock protein family B (small) member 11     |             |                                     |             |       |             |   |  |
| [Source:HGNC Symbol;Acc:HGNC:25019] | -                                                 | 676         | 674                                 | 493         |       |             |   |  |
| 358                                 | 363                                               | 539         | 10.22979349                         | 9.869106246 |       |             |   |  |
| 9.478623062                         | 6.147330423                                       | 6.895177845 | 7.744818961                         |             |       |             |   |  |
| ENSG00000271856                     | 0                                                 | 0           | 0                                   | 10.35968495 | 0     |             |   |  |
| 22.42861518                         | 0                                                 | 10.92943338 | -5.930389621                        | 0.00980876  |       |             |   |  |
| 0.069071317                         | LINC01215                                         | 3           | 108125821                           |             |       |             |   |  |
| 108138610                           | +                                                 | 2592        | lincRNA long intergenic non-protein |             |       |             |   |  |
| coding RNA 1215                     | [Source:HGNC Symbol;Acc:HGNC:49651]               |             |                                     |             |       | -           | 0 |  |
| 0                                   | 0                                                 | 10          | 0                                   | 26          | 0     | 0           | 0 |  |
| 0.214376436                         | 0                                                 | 0.466411628 |                                     |             |       |             |   |  |
| ENSG00000136942                     | 9943.470587                                       | 13753.70967 | 13901.07515                         |             |       |             |   |  |
| 14779.12655                         | 16717.14782                                       | 17638.38056 | 12532.7518                          |             |       |             |   |  |
| 16378.21831                         | -0.386156793                                      | 0.00981993  | 0.069122459                         | RPL35       |       |             |   |  |
| 9                                   | 124857880                                         | 124861981   | -                                   | 1535        |       |             |   |  |
| protein_coding                      | ribosomal protein L35 [Source:HGNC                |             |                                     |             |       |             |   |  |
| Symbol;Acc:HGNC:10344]              | -                                                 | 10960       | 15541                               | 11958       | 14266 | 14645       |   |  |
| 20447                               | 349.6478466                                       | 479.7301585 | 484.682139                          |             |       |             |   |  |
| 516.4233654                         | 586.4464429                                       | 619.3729513 |                                     |             |       |             |   |  |
| ENSG00000143889                     | 962.5932749                                       | 981.4596248 | 1063.67986                          |             |       |             |   |  |
| 725.1779464                         | 823.0156081                                       | 673.7210944 | 1002.577586                         |             |       |             |   |  |
| 740.6382163                         | 0.43735242                                        | 0.009846248 | 0.069238432                         |             |       |             |   |  |
| HNRNPLL 2                           | 38561978                                          | 38603586    | -                                   | 5923        |       |             |   |  |
| protein_coding                      | heterogeneous nuclear ribonucleoprotein L like    |             |                                     |             |       |             |   |  |
| [Source:HGNC Symbol;Acc:HGNC:25127] | -                                                 | 1061        | 1109                                | 915         |       |             |   |  |
| 700                                 | 721                                               | 781         | 8.772074972                         | 8.871892162 |       |             |   |  |



|                                      |                                             |                       |                        |             |             |
|--------------------------------------|---------------------------------------------|-----------------------|------------------------|-------------|-------------|
| 9.61139018                           | 6.567020183                                 | 7.482399499           | 6.131127101            |             |             |
| ENSG00000118113                      | 6.350756762                                 | 9.734946684           | 10.46242485            | 0           |             |
| 0                                    | 0                                           | 8.849376098           | 0                      | 5.577672916 |             |
| 0.009847086                          | 0.069238432                                 | MMP8                  | 11                     | 102711795   |             |
| 102727050                            | -                                           | 3438                  | protein_coding         | matrix      |             |
| metallopeptidase 8                   | [Source:HGNC                                | Symbol;Acc:HGNC:7175] | -                      | 7           |             |
| 11                                   | 9                                           | 0                     | 0                      | 0           | 0.099705898 |
| 0.151604905                          | 0.162870895                                 | 0                     | 0                      | 0           |             |
| ENSG00000100106                      | 764.8125643                                 | 904.4650465           | 875.3562124            |             |             |
| 557.3510503                          | 739.6867047                                 | 413.2041027           | 848.2112744            |             |             |
| 570.0806192                          | 0.575005543                                 | 0.009848148           | 0.069238432            | TRIOBP      |             |
| 22                                   | 37696988                                    | 37776556              | +                      | 12254       |             |
| protein_coding                       | TRIO and F-actin binding protein            | [Source:HGNC          | Symbol;Acc:HGNC:17009] | -           | 843         |
| 479                                  | 3.368824464                                 | 3.951840981           | 3.823172968            | 753         | 538         |
| 2.439587746                          | 3.250457486                                 | 1.817559578           |                        |             | 648         |
| ENSG00000285922                      | 25.40302705                                 | 34.51481097           | 27.8997996             |             |             |
| 3.107905485                          | 0                                           | 9.489029498           | 29.27254587            | 4.198978328 |             |
| 2.762994839                          | 0.00985734                                  | 0.069259763           | AC104453.1             |             |             |
| 1                                    | 98052077                                    | 98054592              | -                      | 1784        |             |
| lincRNA novel transcript             |                                             | -                     | 28                     | 39          | 24          |
| 0                                    | 11                                          | 0.76858493            | 1.035848396            | 0.836995722 | 3           |
| 0.093441209                          | 0                                           | 0.286700766           |                        |             |             |
| ENSG00000249992                      | 17263.17138                                 | 21972.65966           | 19819.32014            |             |             |
| 29628.69895                          | 25515.76684                                 | 21562.52558           | 19685.05039            |             |             |
| 25568.99712                          | -0.377261049                                | 0.009859013           | 0.069259763            |             |             |
| TMEM158 3                            | 45224466                                    | 45226278              | -                      | 1813        |             |
| protein_coding                       | transmembrane protein 158 (gene/pseudogene) | [Source:HGNC          | Symbol;Acc:HGNC:30293] | -           | 19028       |
| 28600                                | 22353                                       | 24996                 | 513.9537299            | 648.8889423 | 17049       |
| 585.0701663                          | 876.5572228                                 | 757.8536982           | 641.0674555            |             |             |
| ENSG00000259488                      | 21.77402318                                 | 12.38993214           | 9.299933199            |             |             |
| 2.07193699                           | 0                                           | 0                     | 14.48796284            | 0.690645663 |             |
| 4.414955628                          | 0.00986443                                  | 0.069270307           | AC023355.1             | 15          |             |
| 48312353                             | 48331856                                    | -                     | 4710                   | antisense   |             |
| "novel transcript, antisense to DUT" |                                             | -                     | 24                     | 14          |             |
| 8                                    | 2                                           | 0                     | 0                      | 0.249527846 | 0.140842449 |
| 0.105675893                          | 0.023595063                                 | 0                     | 0                      |             |             |
| ENSG00000221968                      | 431.8514598                                 | 563.7419125           | 631.2329659            |             |             |
| 362.5889732                          | 417.7860091                                 | 279.4950507           | 542.2754461            |             |             |
| 353.290011                           | 0.619092734                                 | 0.009873455           | 0.069306169            | FADS3       |             |
| 11                                   | 61873519                                    | 61892051              | -                      | 6283        |             |
| protein_coding                       | fatty acid desaturase 3                     | [Source:HGNC          | Symbol;Acc:HGNC:3576]  | -           | 476         |
| 324                                  | 3.709954442                                 | 4.803953704           | 5.3769948              | 543         | 350         |
| 3.095373272                          | 3.580645993                                 | 2.397777986           |                        |             | 366         |
| ENSG00000112759                      | 2388.791793                                 | 2077.96862            | 2580.731463            |             |             |
| 1765.290315                          | 1943.960583                                 | 1717.514339           | 2349.163959            |             |             |
| 1808.921746                          | 0.376933443                                 | 0.009883649           | 0.069350205            |             |             |
| SLC29A1 6                            | 44219505                                    | 44234151              | +                      | 4408        |             |

|                               |                                                                                               |             |             |                      |                      |      |             |       |
|-------------------------------|-----------------------------------------------------------------------------------------------|-------------|-------------|----------------------|----------------------|------|-------------|-------|
| protein_coding                | solute carrier family 29 member 1 (Augustine blood group) [Source:HGNC Symbol;Acc:HGNC:11003] |             |             |                      |                      | -    | 2633        | 2348  |
|                               | 2220                                                                                          | 1704        | 1703        | 1991                 | 29.25081404          |      | 25.23962788 |       |
|                               | 31.33417288                                                                                   |             | 21.48028544 |                      | 23.74763812          |      | 21.00200185 |       |
| ENSG00000226053               | 21.77402318                                                                                   |             | 4.424975766 |                      | 2.3249833            |      | 0           |       |
|                               | 0                                                                                             | 0           | 9.507994083 | 0                    | 5.685780125          |      |             |       |
| 0.009891798                   | 0.069371317                                                                                   |             | LINC01776   |                      | 1                    |      | 98210747    |       |
|                               | 98272658                                                                                      | +           | 2229        | lincRNA              | long intergenic non- |      |             |       |
| protein_coding                | RNA 1776 [Source:HGNC Symbol;Acc:HGNC:52566]                                                  |             |             |                      |                      | -    |             |       |
|                               | 24                                                                                            | 5           | 2           | 0                    | 0                    | 0    | 0.527266109 |       |
|                               | 0.106288524                                                                                   |             | 0.055824748 | 0                    | 0                    | 0    |             |       |
| ENSG00000104643               | 927.2104872                                                                                   |             | 692.9512049 |                      | 877.6811957          |      |             |       |
| 1219.334919                   | 1086.70022                                                                                    |             | 1108.491173 |                      | 832.6142959          |      |             |       |
| 1138.175437                   | -0.451461998                                                                                  |             | 0.009894501 |                      | 0.069371317          |      |             | MTMR9 |
|                               | 8                                                                                             | 11284416    | 11328146    |                      | +                    | 8804 |             |       |
| protein_coding                | myotubularin related protein 9 [Source:HGNC Symbol;Acc:HGNC:14596]                            |             |             |                      |                      | -    |             |       |
|                               | 1285                                                                                          | 5.684595219 | 4.21413233  |                      | 5.335483293          |      |             | 952   |
| 7.428625634                   | 6.646672413                                                                                   |             | 6.786629052 |                      |                      |      |             |       |
| ENSG00000160255               | 74.39457921                                                                                   |             | 102.6594378 |                      | 41.8496994           |      |             |       |
| 23.82727538                   | 20.54685291                                                                                   |             | 33.64292277 |                      | 72.96790546          |      |             |       |
| 26.00568369                   | 1.486467652                                                                                   |             | 0.009902727 |                      | 0.069401478          |      |             | ITGB2 |
|                               | 21                                                                                            | 44885953    | 44931989    |                      | -                    | 6797 |             |       |
| protein_coding                | integrin subunit beta 2 [Source:HGNC Symbol;Acc:HGNC:6155]                                    |             |             |                      |                      | -    |             |       |
|                               | 39                                                                                            | 0.590779295 | 0.808662232 |                      | 0.329527814          |      |             | 18    |
| 0.188028036                   | 0.162780581                                                                                   |             | 0.266795411 |                      |                      |      |             |       |
| ENSG00000241255               | 3.629003864                                                                                   |             | 10.61994184 |                      | 12.78740815          |      | 0           |       |
|                               | 0                                                                                             | 0           | 9.01211795  | 0                    | 5.602721983          |      |             |       |
| 0.009907292                   | 0.069405974                                                                                   |             | AL136126.1  |                      | 11                   |      | 33237008    |       |
|                               | 33237409                                                                                      | +           | 402         | processed_pseudogene |                      |      |             |       |
| ribosomal protein S24 (RPS24) | pseudogene                                                                                    |             |             |                      |                      | -    | 4           | 12    |
|                               | 11                                                                                            | 0           | 0           | 0                    | 0.487262088          |      | 1.414430569 |       |
|                               | 1.702446523                                                                                   | 0           | 0           | 0                    |                      |      |             |       |
| ENSG00000089472               | 42.6407954                                                                                    |             | 68.14462679 |                      | 213.8984636          |      |             |       |
| 48.69051926                   | 34.24475485                                                                                   |             | 28.46708849 |                      | 108.2279619          |      |             |       |
| 37.13412087                   | 1.54023899                                                                                    |             | 0.009922116 |                      | 0.069482309          |      |             | HEPH  |
|                               | X                                                                                             | 66162549    | 66268867    |                      | +                    | 7113 |             |       |
| protein_coding                | hephaestin [Source:HGNC Symbol;Acc:HGNC:4866]                                                 |             |             |                      |                      | -    |             |       |
|                               | 47                                                                                            | 77          | 184         | 47                   | 30                   | 33   | 0.323574086 |       |
|                               | 0.51293739                                                                                    |             | 1.609429142 |                      | 0.367161464          |      | 0.259248234 |       |
|                               | 0.215720863                                                                                   |             |             |                      |                      |      |             |       |
| ENSG00000165118               | 253.1230195                                                                                   |             | 246.9136477 |                      | 369.6723447          |      |             |       |
| 216.5174154                   | 163.2333314                                                                                   |             | 104.3793245 |                      | 289.903004           |      |             |       |
| 161.3766904                   | 0.845921133                                                                                   |             | 0.009977868 |                      | 0.069806311          |      |             |       |
| C9orf64 9                     | 83938311                                                                                      |             | 83956986    |                      | -                    | 2729 |             |       |
| protein_coding                | chromosome 9 open reading frame 64 [Source:HGNC Symbol;Acc:HGNC:28144]                        |             |             |                      |                      | -    |             |       |
|                               | 121                                                                                           | 5.006443867 | 4.844256252 |                      | 7.249873535          |      |             | 143   |
| 4.255541147                   | 3.220919435                                                                                   |             | 2.061640099 |                      |                      |      |             |       |

|                          |                                                        |                       |                   |        |
|--------------------------|--------------------------------------------------------|-----------------------|-------------------|--------|
| ENSG00000115526          | 457.2544869                                            | 615.9566266           | 409.1970608       |        |
| 686.8471121              | 731.6962619                                            | 732.3805494           | 494.1360581       |        |
| 716.9746411              | -0.535529089                                           | 0.009981197           | 0.069806311       | CHST10 |
| 2                        | 100391860                                              | 100417656             | - 4487            |        |
| protein_coding           | carbohydrate sulfotransferase 10                       | [Source:HGNC          |                   |        |
| Symbol;Acc:HGNC:19650]   | -                                                      | 504 696               | 352 663           | 641    |
| 849                      | 5.50051243                                             | 7.349869209           | 4.880827293       |        |
| 8.210498054              | 8.781108031                                            | 8.797973284           |                   |        |
| ENSG00000104783          | 1322.771908                                            | 1532.811605           | 1411.264863       |        |
| 1706.240111              | 1838.943335                                            | 2012.536893           | 1422.282792       |        |
| 1852.573446              | -0.381504199                                           | 0.009984983           | 0.069806311       | KCNN4  |
| 19                       | 43766533                                               | 43781261              | - 3408            |        |
| protein_coding           | potassium calcium-activated channel subfamily N member |                       |                   |        |
| 4 [Source:HGNC           | Symbol;Acc:HGNC:6293]                                  | -                     | 1458 1732         | 1214   |
| 1647                     | 1611 2333                                              | 20.95012514           | 24.08101246       |        |
| 22.16286736              | 26.85381896                                            | 29.05650096           | 31.83069864       |        |
| ENSG00000157837          | 784.7720856                                            | 764.6358123           | 795.1442885       |        |
| 1040.112369              | 961.1361193                                            | 1132.645066           | 781.5173955       |        |
| 1044.631185              | -0.419360911                                           | 0.009986822           | 0.069806311       | SPPL3  |
| 12                       | 120762510                                              | 120904371             | - 6672            |        |
| protein_coding           | signal peptide peptidase like 3                        | [Source:HGNC          |                   |        |
| Symbol;Acc:HGNC:30424]   | -                                                      | 865 864               | 684 1004          | 842    |
| 1313                     | 6.348757712                                            | 6.135982971           | 6.378328911       |        |
| 8.361606369              | 7.757171873                                            | 9.150392149           |                   |        |
| ENSG00000172270          | 14302.81148                                            | 16881.28255           | 21739.75634       |        |
| 12804.5706               | 14664.74552                                            | 12639.38729           | 17641.28346       |        |
| 13369.5678               | 0.399948663                                            | 0.009988115           | 0.069806311       | BSG    |
| 19                       | 571277 583493                                          | + 3797                | protein_coding    |        |
| basigin (Ok blood group) | [Source:HGNC                                           | Symbol;Acc:HGNC:1116] | -                 |        |
| 15765                    | 19075 18701                                            | 12360 12847           | 14652 203.3209178 |        |
| 238.0402459              | 306.4298578                                            | 180.8797367           | 207.973733        |        |
| 179.4268079              |                                                        |                       |                   |        |
| ENSG00000127220          | 688.6034832                                            | 946.0598187           | 838.1564796       |        |
| 1014.213157              | 1195.141944                                            | 1201.65619            | 824.2732605       |        |
| 1137.003764              | -0.464148867                                           | 0.010003588           | 0.069886837       | ABHD8  |
| 19                       | 17292131                                               | 17310236              | - 2210            |        |
| protein_coding           | abhydrolase domain containing 8                        | [Source:HGNC          |                   |        |
| Symbol;Acc:HGNC:23759]   | -                                                      | 759 1069              | 721 979           | 1047   |
| 1393                     | 16.81814861                                            | 22.91985535           | 20.2978406        |        |
| 24.61514859              | 29.12069718                                            | 29.30824821           |                   |        |
| ENSG00000160789          | 23889.73244                                            | 26523.30474           | 32536.97879       |        |
| 22192.5171               | 23220.22677                                            | 18601.94837           | 27650.00532       |        |
| 21338.23075              | 0.373833107                                            | 0.010009664           | 0.069901677       | LMNA   |
| 1                        | 156082573                                              | 156140089             | + 6985            |        |
| protein_coding           | lamin A/C                                              | [Source:HGNC          |                   |        |
| Symbol;Acc:HGNC:6636]    | -                                                      | 21422 20342           | 21564 184.6061306 |        |
| 26332                    | 29970 27989                                            | 170.4141482           | 179.0088901       |        |
| 203.3043978              | 249.30318                                              |                       |                   |        |
| 143.5469373              |                                                        |                       |                   |        |
| ENSG00000099991          | 2159.257299                                            | 1792.115185           | 2190.134268       |        |
| 1729.031418              | 1498.77877                                             | 1438.881928           | 2047.168917       |        |

|                        |                                    |              |             |        |
|------------------------|------------------------------------|--------------|-------------|--------|
| 1555.564039            | 0.396074041                        | 0.010016977  | 0.069913533 | CABIN1 |
| 22                     | 24011192                           | 24178628     | + 9388      |        |
| protein_coding         | calcineurin binding protein 1      | [Source:HGNC |             |        |
| Symbol;Acc:HGNC:24187] | -                                  | 2380 2025    | 1884 1669   | 1313   |
| 1668                   | 12.4145951                         | 10.22064697  | 12.48575084 |        |
| 9.8785977              | 8.596843195                        | 8.261406338  |             |        |
| ENSG00000134186        | 2322.562473                        | 2011.593983  | 1906.486306 |        |
| 1742.499008            | 1580.966182                        | 1437.156649  | 2080.214254 |        |
| 1586.873947            | 0.391122142                        | 0.010019267  | 0.069913533 |        |
| PRPF38B 1              | 108692323                          | 108701803    | + 5817      |        |
| protein_coding         | pre-mRNA processing factor 38B     | [Source:HGNC |             |        |
| Symbol;Acc:HGNC:25512] | -                                  | 2560 2273    | 1640 1682   | 1385   |
| 1666                   | 21.55110709                        | 18.51513201  | 17.54089023 |        |
| 16.06715455            | 14.63518005                        | 13.31701692  |             |        |
| ENSG00000171606        | 285.7840543                        | 296.4733763  | 227.8483634 |        |
| 365.6968787            | 369.8433523                        | 538.2867643  | 270.0352647 |        |
| 424.6089984            | -0.65289577                        | 0.010040008  | 0.069982591 | ZNF274 |
| 19                     | 58183029                           | 58213562     | + 8333      |        |
| protein_coding         | zinc finger protein 274            | [Source:HGNC |             |        |
| Symbol;Acc:HGNC:13068] | zf-C2H2                            | 315 335      | 196 353     | 324    |
| 624                    | 1.851133991                        | 1.904889843  | 1.463394897 |        |
| 2.353885682            | 2.38996196                         | 3.48188342   |             |        |
| ENSG00000014164        | 571.5681086                        | 704.4561419  | 595.1957247 |        |
| 708.6024505            | 916.617938                         | 1053.282274  | 623.7399917 |        |
| 892.8342209            | -0.51759722                        | 0.010040765  | 0.069982591 | ZC3H3  |
| 8                      | 143437655                          | 143541453    | - 3731      |        |
| protein_coding         | zinc finger CCH-type containing 3  | [Source:HGNC |             |        |
| Symbol;Acc:HGNC:28972] | -                                  | 630 796      | 512 684     | 803    |
| 1221                   | 8.268828489                        | 10.10914113  | 8.537909726 |        |
| 10.18692002            | 13.22932411                        | 15.21673344  |             |        |
| ENSG00000105514        | 15.42326642                        | 27.43484975  | 26.73730795 |        |
| 85.98538508            | 37.66923033                        | 78.50015312  | 23.19847471 |        |
| 67.38492284            | -1.54317295                        | 0.010047166  | 0.069982591 | RAB3D  |
| 19                     | 11322046                           | 11346270     | - 4417      |        |
| protein_coding         | "RAB3D, member RAS oncogene family | [Source:HGNC |             |        |
| Symbol;Acc:HGNC:9779]" | -                                  | 17 31        | 23 83       | 33     |
| 91                     | 0.188473461                        | 0.332552897  | 0.323971856 |        |
| 1.044149625            | 0.459233859                        | 0.957954785  |             |        |
| ENSG00000189343        | 1765.51038                         | 1882.384691  | 1761.17485  |        |
| 1947.62077             | 2618.582254                        | 2577.565467  | 1803.023307 |        |
| 2381.256164            | -0.401244922                       | 0.01004824   | 0.069982591 |        |
| RPS2P46 17             | 19445970                           | 19446852     | - 883       |        |
| processed_pseudogene   | ribosomal protein S2 pseudogene 46 | [Source:HGNC |             |        |
| Symbol;Acc:HGNC:35839] | -                                  |              | 1946 2127   | 1515   |
| 1880                   | 2294 2988                          | 107.9222065  | 114.1387803 |        |
| 106.7477613            | 118.3066588                        | 159.6908638  | 157.3442612 |        |
| ENSG00000022567        | 348.3843709                        | 314.1732794  | 241.7982632 |        |
| 427.8549884            | 372.126336                         | 659.9188696  | 301.4519712 |        |
| 486.633398             | -0.691022909                       | 0.010049097  | 0.069982591 |        |
| SLC45A4 8              | 141207166                          | 141308305    | - 8608      |        |

|                              |                                                         |             |              |                |             |        |     |
|------------------------------|---------------------------------------------------------|-------------|--------------|----------------|-------------|--------|-----|
| protein_coding               | solute carrier family 45 member 4 [Source:HGNC          |             |              |                |             |        |     |
| Symbol;Acc:HGNC:29196]       | -                                                       | 384         | 355          | 208            | 413         | 326    |     |
| 765                          | 2.184528171                                             | 1.954125876 | 1.503377074  |                |             |        |     |
| 2.665998109                  | 2.327891325                                             | 4.132284317 |              |                |             |        |     |
| ENSG00000141499              | 921.7669814                                             | 915.9699835 | 839.3189712  |                |             |        |     |
| 1019.392999                  | 1225.962223                                             | 1405.239005 | 892.3519787  |                |             |        |     |
| 1216.864742                  | -0.447576259                                            | 0.010052901 | 0.069982591  |                |             | WRAP53 |     |
| 17                           | 7686071                                                 | 7703502     | + 5087       | protein_coding |             | WD     |     |
| repeat                       | containing antisense to TP53 [Source:HGNC               |             |              |                |             |        |     |
| Symbol;Acc:HGNC:25522]       | -                                                       | 1016        | 1035         | 722            | 984         | 1074   |     |
| 1629                         | 9.780490912                                             | 9.640621957 | 8.830439239  |                |             |        |     |
| 10.74843921                  | 12.97746613                                             | 14.88985144 |              |                |             |        |     |
| ENSG00000280054              | 0.907250966                                             | 0           | 0            | 19.6834014     |             |        |     |
| 7.990442797                  | 6.038473317                                             | 0.302416989 |              |                |             |        |     |
| 11.23743917                  | -5.003049462                                            | 0.010060295 | 0.070006516  |                |             |        |     |
| AC004241.5                   | 12                                                      | 47728151    | 47730598     | -              |             | 2448   |     |
| TEC                          | TEC                                                     | -           | 1            | 0              | 0           | 19     |     |
| 7                            | 0.02000402                                              | 0           | 0            | 0.431274948    |             | 7      |     |
| 0.175765643                  | 0.132958971                                             |             |              |                |             |        |     |
| ENSG00000166199              | 628.7249194                                             | 685.8712437 | 731.2072478  |                |             |        |     |
| 951.0190783                  | 836.7135101                                             | 998.0733754 | 681.9344703  |                |             |        |     |
| 928.6019879                  | -0.446576974                                            | 0.0100678   | 0.070031186  |                |             | ALKBH3 |     |
| 11                           | 43880811                                                | 43920266    | + 2372       |                |             |        |     |
| protein_coding               | "alkB homolog 3, alpha-ketoglutaratedependent           |             |              |                |             |        |     |
| dioxygenase [Source:HGNC     | Symbol;Acc:HGNC:30141]"                                 |             |              |                |             | -      | 693 |
| 775                          | 629                                                     | 918         | 733          | 1157           | 14.30695574 |        |     |
| 15.48151503                  | 16.49843718                                             | 21.50502938 | 18.99488419  |                |             |        |     |
| 22.68034687                  |                                                         |             |              |                |             |        |     |
| ENSG00000236939              | 0                                                       | 0           | 0            | 7.251779464    | 4.565967313 |        |     |
| 14.66486377                  | 0                                                       | 8.827536849 | -5.621428524 |                |             |        |     |
| 0.010104212                  | 0.070256842                                             | BAALC-AS2   | 8            | 103132963      |             |        |     |
| 103141475                    | -                                                       | 513         | antisense    | BAALC          |             |        |     |
| antisense RNA 2 [Source:HGNC | Symbol;Acc:HGNC:28595]                                  |             |              |                |             | -      | 0   |
| 0                            | 0                                                       | 7           | 4            | 17             | 0           | 0      |     |
| 0.758215605                  | 0.47928075                                              | 1.540857847 |              |                |             |        |     |
| ENSG00000105613              | 87.09609273                                             | 78.76456863 | 131.3615564  |                |             |        |     |
| 199.9419195                  | 182.6386925                                             | 166.4893357 | 99.0740726   |                |             |        |     |
| 183.0233159                  | -0.889751456                                            | 0.010118299 | 0.070327147  |                |             | MAST1  |     |
| 19                           | 12833951                                                | 12874951    | + 6533       |                |             |        |     |
| protein_coding               | microtubule associated serine/threonine kinase 1        |             |              |                |             |        |     |
| [Source:HGNC                 | Symbol;Acc:HGNC:19034]                                  |             |              |                |             | -      | 96  |
| 193                          | 160                                                     | 193         | 0.719593544  | 0.645511211    |             | 113    |     |
| 1.076149559                  | 1.641559748                                             | 1.505409612 | 1.373648667  |                |             |        |     |
| ENSG00000242641              | 12.70151352                                             | 15.0449176  | 0            | 53.87036173    |             |        |     |
| 26.25431205                  | 60.38473317                                             | 9.248810376 | 46.83646898  |                |             |        |     |
| -2.320657641                 | 0.010154152                                             | 0.070548623 | LINC00971    |                |             |        |     |
| 3                            | 84638406                                                | 84881679    | -            | 8031           |             |        |     |
| lincRNA                      | long intergenic non-protein coding RNA 971 [Source:HGNC |             |              |                |             |        |     |
| Symbol;Acc:HGNC:48737]       | -                                                       | 14          | 17           | 0              | 52          | 23     |     |
| 70                           | 0.085366425                                             | 0.100301109 | 0            | 0.359787244    |             |        |     |

|                                               |                                                   |                                     |                |               |             |             |
|-----------------------------------------------|---------------------------------------------------|-------------------------------------|----------------|---------------|-------------|-------------|
|                                               | 0.176037653                                       | 0.405283975                         |                |               |             |             |
| ENSG0000042832                                | 12.70151352                                       | 7.964956378                         | 5.812458249    | 0             |             |             |
|                                               | 0                                                 | 8.826309384                         | 0              | 5.57677445    |             |             |
| 0.010174198                                   | 0.070634774                                       | TG                                  | 8              | 132866958     |             |             |
| 133134903                                     | +                                                 | 11132                               | protein_coding | thyroglobulin |             |             |
| [Source:HGNC Symbol;Acc:HGNC:11764]           | -                                                 |                                     |                | 14            | 9           | 5           |
|                                               | 0                                                 | 0                                   | 0.061586216    | 0.038308553   |             |             |
| 0.02794497                                    | 0                                                 | 0                                   | 0              |               |             |             |
| ENSG00000108439                               | 840.1143945                                       | 644.2764715                         | 633.5579492    |               |             |             |
| 507.6245625                                   | 513.6713227                                       | 468.4130016                         | 705.9829384    |               |             |             |
| 496.5696289                                   | 0.508682828                                       | 0.010177783                         | 0.070634774    |               |             | PNPO        |
|                                               | 17                                                | 47941506                            | 47949308       | +             | 5226        |             |
| protein_coding                                | pyridoxamine 5'-phosphate oxidase                 | [Source:HGNC                        |                |               |             |             |
| Symbol;Acc:HGNC:30260]                        | -                                                 | 926                                 | 728            | 545           | 490         | 450         |
|                                               | 543                                               | 8.677013334                         | 6.600675988    | 6.488345138   |             |             |
| 5.210011936                                   | 5.292860754                                       | 4.831271482                         |                |               |             |             |
| ENSG00000133739                               | 744.8530431                                       | 532.7670822                         | 498.7089178    |               |             |             |
| 494.1569721                                   | 326.4666629                                       | 319.1764468                         | 592.109681     |               |             |             |
| 379.9333606                                   | 0.641178866                                       | 0.010178531                         | 0.070634774    |               |             | LRRCC1      |
|                                               | 8                                                 | 85107147                            | 85146076       | +             | 5065        |             |
| protein_coding                                | leucine rich repeat and coiled-coil centrosomal   |                                     |                |               |             |             |
| protein 1 [Source:HGNC Symbol;Acc:HGNC:29373] | -                                                 |                                     | 821            | 602           |             |             |
|                                               | 429                                               | 477                                 | 286            | 370           | 7.937658145 | 5.631751487 |
|                                               | 5.269685406                                       | 5.233002871                         | 3.470834803    | 3.396669507   |             |             |
| ENSG00000104901                               | 0.907250966                                       | 0                                   | 0              | 18.64743291   |             |             |
| 3.424475485                                   | 12.07694663                                       | 0.302416989                         |                |               |             |             |
| 11.38295168                                   | -5.024796587                                      | 0.010182598                         | 0.070635286    |               |             | DKKL1       |
|                                               | 19                                                | 49361783                            | 49375116       | +             | 1461        |             |
| protein_coding                                | dickkopf like acrosomal protein 1 [Source:HGNC    |                                     |                |               |             |             |
| Symbol;Acc:HGNC:16528]                        | -                                                 | 1                                   | 0              | 0             | 18          | 3           |
|                                               | 14                                                | 0.033518029                         | 0              | 0             | 0.684595961 |             |
| 0.126217159                                   | 0.445562711                                       |                                     |                |               |             |             |
| ENSG00000151131                               | 553.4230892                                       | 582.3268108                         | 526.6087174    |               |             |             |
| 1030.788652                                   | 636.9524401                                       | 755.6718037                         | 554.1195391    |               |             |             |
| 807.8042987                                   | -0.543645754                                      | 0.01019731                          | 0.070709609    |               |             |             |
| C12orf45                                      | 12                                                | 104986310                           | 105074197      | +             |             | 25887       |
|                                               | protein_coding                                    | chromosome 12 open reading frame 45 |                |               |             |             |
| [Source:HGNC Symbol;Acc:HGNC:28628]           | -                                                 |                                     | 610            | 658           |             | 453         |
|                                               | 995                                               | 558                                 | 876            | 1.153922907   | 1.204399623 |             |
| 1.088737859                                   | 2.135764683                                       | 1.324951055                         | 1.573451644    |               |             |             |
| ENSG00000122884                               | 1199.385777                                       | 1100.93397                          | 2266.858717    |               |             |             |
| 947.9111728                                   | 1150.623763                                       | 873.8533529                         | 1522.392822    |               |             |             |
| 990.7960962                                   | 0.619120681                                       | 0.010208011                         | 0.070756075    |               |             | P4HA1       |
|                                               | 10                                                | 73007217                            | 73096974       | -             | 3093        |             |
| protein_coding                                | prolyl 4-hydroxylase subunit alpha 1 [Source:HGNC |                                     |                |               |             |             |
| Symbol;Acc:HGNC:8546]                         | -                                                 | 1322                                | 1244           | 1950          | 915         | 1008        |
|                                               | 1013                                              | 20.93052967                         | 19.05754269    | 39.22487226   |             |             |
| 16.43816054                                   | 20.03216886                                       | 15.22861978                         |                |               |             |             |
| ENSG00000138757                               | 4010.956521                                       | 3810.789129                         | 3883.884602    |               |             |             |
| 5220.245246                                   | 4828.510433                                       | 4541.794573                         | 3901.876751    |               |             |             |

|                          |                                                       |             |             |        |
|--------------------------|-------------------------------------------------------|-------------|-------------|--------|
| 4863.516751              | -0.317728152                                          | 0.010259901 | 0.0710657   | G3BP2  |
| 4                        | 75642782                                              | 75724525    | - 7183      |        |
| protein_coding           | G3BP stress granule assembly factor 2 [Source:HGNC    |             |             |        |
| Symbol;Acc:HGNC:30291]   | -                                                     | 4421 4306   | 3341 5039   | 4230   |
| 5265                     | 30.14000583                                           | 28.40498733 | 28.93859593 |        |
| 38.98078094              | 36.19777374                                           | 34.08187876 |             |        |
| ENSG00000173548          | 481.7502629                                           | 508.872213  | 1068.329826 |        |
| 444.4304843              | 343.5890403                                           | 447.7096645 | 686.3174341 |        |
| 411.9097297              | 0.734137129                                           | 0.010260716 | 0.0710657   | SNX33  |
| 15                       | 75647906                                              | 75662301    | + 8008      |        |
| protein_coding           | sorting nexin 33 [Source:HGNC Symbol;Acc:HGNC:28468]  |             |             |        |
| -                        | 531 575                                               | 919 429     | 301 519     |        |
| 3.247125993              | 3.402281323                                           | 7.140001344 | 2.976769939 |        |
| 2.310413914              | 3.013521619                                           |             |             |        |
| ENSG00000086589          | 1117.73319                                            | 1250.498151 | 1470.551937 |        |
| 1650.297812              | 1834.377368                                           | 1614.860293 | 1279.594426 |        |
| 1699.845158              | -0.410235671                                          | 0.010271269 | 0.071110953 | RBM22  |
| 5                        | 150690794                                             | 150701107   | - 3615      |        |
| protein_coding           | RNA binding motif protein 22 [Source:HGNC             |             |             |        |
| Symbol;Acc:HGNC:25503]   | -                                                     | 1232 1413   | 1265 1593   | 1607   |
| 1872                     | 16.68902979                                           | 18.52082384 | 21.77153603 |        |
| 24.48609431              | 27.32467061                                           | 24.0784519  |             |        |
| ENSG00000273416          | 0 7.079961225                                         | 6.974949899 | 39.36680281 |        |
| 37.66923033              | 15.52750281                                           | 4.684970375 | 30.85451198 |        |
| -2.729636657             | 0.010289489                                           | 0.071209221 | AL732292.2  |        |
| 1                        | 235104180                                             | 235104609   | - 430       |        |
| lincRNA novel transcript | -                                                     | 0           | 8 6         | 38     |
| 33                       | 18 0                                                  | 0.881552075 | 0.868139749 |        |
| 4.910516613              | 4.717292919                                           | 1.946413319 |             |        |
| ENSG00000144959          | 1385.372225                                           | 1047.834261 | 1156.679192 |        |
| 1046.32818               | 778.4974268                                           | 714.2651295 | 1196.628559 |        |
| 846.3635787              | 0.500097587                                           | 0.010304235 | 0.071283387 | NCEH1  |
| 3                        | 172630249                                             | 172711218   | - 4808      |        |
| protein_coding           | neutral cholesterol ester hydrolase 1 [Source:HGNC    |             |             |        |
| Symbol;Acc:HGNC:29260]   | -                                                     | 1527 1184   | 995 1010    | 682    |
| 828                      | 15.55260928                                           | 11.66846383 | 12.87554047 |        |
| 11.67263642              | 8.71901201                                            | 8.007499052 |             |        |
| ENSG00000196653          | 68.04382245                                           | 52.21471403 | 69.74949899 |        |
| 126.3881564              | 90.17785443                                           | 182.8794776 | 63.33601183 |        |
| 133.1484961              | -1.076551866                                          | 0.010319318 | 0.071359819 | ZNF502 |
| 3                        | 44712643                                              | 44723831    | + 3273      |        |
| protein_coding           | zinc finger protein 502 [Source:HGNC                  |             |             |        |
| Symbol;Acc:HGNC:23718]   | zf-C2H2                                               | 75 59       | 60 122      | 79     |
| 212                      | 1.122131985                                           | 0.85414666  | 1.140544125 |        |
| 2.071218273              | 1.483639701                                           | 3.011763556 |             |        |
| ENSG00000101972          | 4823.853386                                           | 3701.04973  | 4820.852872 |        |
| 3803.040345              | 3362.834926                                           | 3001.983878 | 4448.58533  |        |
| 3389.286383              | 0.392363542                                           | 0.010337013 | 0.071454249 | STAG2  |
| X                        | 123960212                                             | 124422664   | + 8187      |        |
| protein_coding           | stromal antigen 2 [Source:HGNC Symbol;Acc:HGNC:11355] |             |             |        |

|                                                           |                      |              |               |                       |                |               |  |
|-----------------------------------------------------------|----------------------|--------------|---------------|-----------------------|----------------|---------------|--|
| -                                                         | 5317                 | 4182         | 4147          | 3671                  | 2946           | 3480          |  |
| 31.80318046                                               | 24.20391833          |              | 31.51491148   |                       | 24.91561651    |               |  |
| 22.11848172                                               | 19.7644836           |              |               |                       |                |               |  |
| ENSG00000183644                                           | 0.907250966          |              | 25.66485944   |                       | 3.48747495     | 0             |  |
| 0                                                         | 0                    | 10.01986179  | 0             |                       | 5.761446137    |               |  |
| 0.01034172                                                | 0.071458859          |              | C11orf88      |                       | 11             | 111514785     |  |
| 111537031                                                 | +                    |              | 3280          | protein_coding        |                | chromosome 11 |  |
| open reading frame 88 [Source:HGNC Symbol;Acc:HGNC:25061] |                      |              |               |                       |                | -             |  |
| 1                                                         | 29                   | 3            | 0             | 0                     | 0              | 0.014929829   |  |
| 0.41893881                                                | 0.056905502          |              | 0             | 0                     | 0              | 0             |  |
| ENSG00000185721                                           | 614.208904           |              | 770.8307784   |                       | 632.3954575    |               |  |
| 828.7747959                                               | 970.2680539          |              | 987.7217068   |                       | 672.47838      |               |  |
| 928.9215189                                               | -0.46565979          |              | 0.010365698   |                       | 0.071596576    | DRG1          |  |
| 22                                                        | 31399523             |              | 31530634      | +                     | 2279           |               |  |
| protein_coding                                            | developmentally      | regulated    | GTP           | binding               | protein 1      |               |  |
| [Source:HGNC Symbol;Acc:HGNC:3029]                        |                      |              | -             | 677                   | 871            | 544           |  |
| 800                                                       | 850                  | 1145         | 14.54698621   |                       | 18.10924193    |               |  |
| 14.8511957                                                | 19.50552776          |              | 22.92566599   |                       | 23.36104035    |               |  |
| ENSG00000170608                                           | 29.93928188          |              | 39.82478189   |                       | 40.68720775    |               |  |
| 56.97826722                                               | 136.9790194          |              | 81.08807026   |                       | 36.8170905     |               |  |
| 91.68178562                                               | -1.315813267         |              | 0.010376964   |                       | 0.071646414    | FOXA3         |  |
| 19                                                        | 45863989             |              | 45873797      | +                     | 2192           |               |  |
| protein_coding                                            | forkhead             | box A3       | [Source:HGNC  | Symbol;Acc:HGNC:5023] |                |               |  |
| Fork                                                      | 33                   | 45           | 35            | 55                    | 120            | 94            |  |
| 0.737228428                                               | 0.972743651          |              | 0.993423298   |                       | 1.39422923     |               |  |
| 3.365023151                                               | 1.993968632          |              |               |                       |                |               |  |
| ENSG00000166507                                           | 26.31027801          |              | 3.539980612   |                       | 5.812458249    | 0             |  |
| 0                                                         | 0.862639045          |              | 11.88757229   |                       | 0.287546348    |               |  |
| 5.045189117                                               | 0.010386301          |              | 0.0716829     |                       | NDST2          | 10            |  |
| 73801911                                                  | 73811798             |              | -             | 4654                  | protein_coding | N-            |  |
| deacetylase and                                           | N-sulfotransferase 2 | [Source:HGNC |               |                       |                |               |  |
| Symbol;Acc:HGNC:7681]                                     | -                    | 29           | 4             | 5                     | 0              | 0             |  |
| 1                                                         | 0.305140815          |              | 0.040724902   |                       | 0.066842159    | 0             |  |
| 0                                                         | 0.009990901          |              |               |                       |                |               |  |
| ENSG00000132612                                           | 1639.402496          |              | 2084.163586   |                       | 1961.123413    |               |  |
| 2207.648863                                               | 2495.301136          |              | 2785.461477   |                       | 1894.896498    |               |  |
| 2496.137159                                               | -0.397899403         |              | 0.010428121   |                       | 0.071917571    | VPS4A         |  |
| 16                                                        | 69311356             |              | 69326939      | +                     | 5670           |               |  |
| protein_coding                                            | vacuolar             | protein      | sorting 4     | homolog A             | [Source:HGNC   |               |  |
| Symbol;Acc:HGNC:13488]                                    | -                    | 1807         | 2355          | 1687                  | 2131           | 2186          |  |
| 3229                                                      | 15.60643749          |              | 19.68041687   |                       | 18.51138316    |               |  |
| 20.88393989                                               | 23.69815081          |              | 26.47987949   |                       |                |               |  |
| ENSG00000175471                                           | 495.3590274          |              | 370.8129692   |                       | 408.0345691    |               |  |
| 267.2798717                                               | 317.3347282          |              | 254.4785184   |                       | 424.7355219    |               |  |
| 279.6977061                                               | 0.604159873          |              | 0.010430945   |                       | 0.071917571    | MCTP1         |  |
| 5                                                         | 94703741             |              | 95284575      | -                     | 12089          |               |  |
| protein_coding                                            | multiple             | C2 and       | transmembrane | domain                | containing 1   |               |  |
| [Source:HGNC Symbol;Acc:HGNC:26183]                       |                      |              | -             | 546                   | 419            | 351           |  |
| 258                                                       | 278                  | 295          | 2.211724092   |                       | 1.642290899    |               |  |
| 1.806440184                                               | 1.185881713          |              | 1.413519417   |                       | 1.134651931    |               |  |



|                                                                      |                                                    |             |             |                |
|----------------------------------------------------------------------|----------------------------------------------------|-------------|-------------|----------------|
| ENSG00000188710                                                      | 29.93928188                                        | 24.77986429 | 10.46242485 | 0              |
| 5.707459141                                                          | 0                                                  | 21.72719034 | 1.90248638  |                |
| 3.577938035                                                          | 0.0104325                                          | 0.071917571 | QRFP        | 9              |
| 130892702                                                            | 130896812                                          | -           | 1658        | protein_coding |
| pyroglutamylated RFamide peptide [Source:HGNC Symbol;Acc:HGNC:29982] |                                                    |             |             |                |
| -                                                                    | 33                                                 | 28          | 9           | 0              |
| 0.974671118                                                          | 0.800202578                                        | 0.337726259 | 0           | 0.185367178    |
| 0                                                                    |                                                    |             |             |                |
| ENSG00000218175                                                      | 119.7571275                                        | 123.8993214 | 131.3615564 |                |
| 185.4383606                                                          | 228.2983656                                        | 222.5608737 | 125.0060018 |                |
| 212.0992                                                             | -0.763530065                                       | 0.010441329 | 0.071950398 |                |
| AC016739.1                                                           | 2                                                  | 176200908   | 176201252   | -              |
| processed_pseudogene                                                 | "ribosomal protein, large, P1 (RPLP1)              |             |             | 345            |
| pseudogene"                                                          | -                                                  | 132         | 140         | 113            |
| 18.73628654                                                          | 19.22805614                                        | 20.37821758 | 28.83008877 | 258            |
| 35.63348187                                                          | 34.77215677                                        |             |             |                |
| ENSG00000168255                                                      | 0.907250966                                        | 1.769990306 | 3.48747495  |                |
| 27.97114936                                                          | 25.11282022                                        | 5.175834272 | 2.054905407 |                |
| 19.41993462                                                          | -3.266600794                                       | 0.010476847 | 0.072167036 |                |
| POLR2J3                                                              | 7                                                  | 102537918   | 102572653   | -              |
| protein_coding                                                       | RNA polymerase II subunit J3 [Source:HGNC          |             |             | 3190           |
| Symbol;Acc:HGNC:33853]                                               | -                                                  | 1           | 2           | 3              |
| 6                                                                    | 0.015351047                                        | 0.029707476 | 0.058510986 | 22             |
| 0.470310987                                                          | 0.42391556                                         | 0.087456398 |             |                |
| ENSG00000065882                                                      | 1431.642024                                        | 1294.747909 | 1450.789579 |                |
| 1075.335298                                                          | 1160.897189                                        | 874.7159919 | 1392.393171 |                |
| 1036.982826                                                          | 0.425880996                                        | 0.010483954 | 0.07218788  | TBC1D1         |
| 4                                                                    | 37891087                                           | 38139175    | +           | 9032           |
| protein_coding                                                       | TBC1 domain family member 1 [Source:HGNC           |             |             |                |
| Symbol;Acc:HGNC:11578]                                               | -                                                  | 1578        | 1463        | 1248           |
| 1014                                                                 | 8.55562525                                         | 7.675149401 | 8.596813457 | 1017           |
| 6.38594933                                                           | 6.921247573                                        | 5.220174781 |             |                |
| ENSG00000176946                                                      | 1217.530796                                        | 1284.127967 | 1354.302772 |                |
| 1232.802509                                                          | 2125.457784                                        | 2154.009696 | 1285.320512 |                |
| 1837.42333                                                           | -0.515850884                                       | 0.01049078  | 0.072206775 | THAP4          |
| 2                                                                    | 241584405                                          | 241637449   | -           | 3147           |
| protein_coding                                                       | THAP domain containing 4 [Source:HGNC              |             |             |                |
| Symbol;Acc:HGNC:23187]                                               | THAP                                               | 1342        | 1451        | 1165           |
| 2497                                                                 | 20.88259455                                        | 21.8472667  | 23.03223214 | 1862           |
| 21.0117518                                                           | 36.36891073                                        | 36.89375144 |             |                |
| ENSG00000228474                                                      | 397.3759231                                        | 577.0168398 | 702.1449565 |                |
| 236.2008168                                                          | 401.8051235                                        | 393.3634046 | 558.8459065 |                |
| 343.7897817                                                          | 0.699688116                                        | 0.010495986 | 0.072214503 | OST4           |
| 2                                                                    | 27070472                                           | 27071773    | -           | 719            |
| protein_coding                                                       | "oligosaccharyltransferase complex subunit 4, non- |             |             |                |
| catalytic [Source:HGNC Symbol;Acc:HGNC:32483]"                       | -                                                  |             | 438         | 652            |
| 604                                                                  | 228                                                | 352         | 456         | 29.83141842    |
| 52.26547417                                                          | 17.62049077                                        | 30.09269846 | 29.48947021 |                |
| ENSG00000155034                                                      | 1025.193592                                        | 1024.824387 | 960.2181028 |                |
| 1224.514761                                                          | 1213.405813                                        | 1662.30544  | 1003.412027 |                |

|                 |                                                                                  |             |             |             |
|-----------------|----------------------------------------------------------------------------------|-------------|-------------|-------------|
| 1366.742005     | -0.446375298                                                                     | 0.010513547 | 0.07228231  | FBXL18      |
| 7               | 5431335                                                                          | 5513798     | -           | 5088        |
| protein_coding  | "BCL2, apoptosis regulator [Source:HGNC Symbol;Acc:HGNC:21874]"                  |             |             | F-box       |
| 18              | -                                                                                | 1130        | 1158        | 826         |
| 1927            | 10.87577025                                                                      | 10.78419911 | 10.10042833 | 1182        |
| 12.90869732     | 12.84202533                                                                      | 17.61025441 |             | 1063        |
| ENSG00000171791 | 462.6979926                                                                      | 350.4580806 | 363.8598864 |             |
| 241.3806593     | 184.9216762                                                                      | 303.6489439 | 392.3386532 |             |
| 243.3170931     | 0.687091022                                                                      | 0.010517421 | 0.07228231  | BCL2        |
| 18              | 63123346                                                                         | 63320128    | -           | 11765       |
| protein_coding  | "BCL2, apoptosis regulator [Source:HGNC Symbol;Acc:HGNC:990]"                    |             |             |             |
| 182             | -                                                                                | 510         | 396         | 313         |
| 352             | 2.122789487                                                                      | 1.594886182 | 1.655233444 | 233         |
| 1.10046449      | 0.846389843                                                                      | 1.391174954 |             | 162         |
| ENSG00000161904 | 1721.962333                                                                      | 2067.348678 | 1906.486306 |             |
| 2181.74965      | 2474.754283                                                                      | 2790.637311 | 1898.599106 |             |
| 2482.380415     | -0.387032933                                                                     | 0.0105181   | 0.07228231  | LEMD2       |
| 6               | 33771202                                                                         | 33789136    | -           | 6788        |
| protein_coding  | LEM domain containing 2 [Source:HGNC Symbol;Acc:HGNC:21244]"                     |             |             |             |
| 182             | -                                                                                | 1898        | 2336        | 1640        |
| 3235            | 13.69250972                                                                      | 16.30637575 | 15.03172635 | 2106        |
| 17.23965525     | 19.63201171                                                                      | 22.15967923 |             | 2168        |
| ENSG00000132716 | 781.1430817                                                                      | 761.9808268 | 602.1706746 |             |
| 874.3574097     | 1168.887632                                                                      | 963.5678136 | 715.0981944 |             |
| 1002.270952     | -0.485541739                                                                     | 0.010526718 | 0.072313442 | DCAF8       |
| 1               | 160215715                                                                        | 160262531   | -           | 7587        |
| protein_coding  | DDB1 and CUL4 associated factor 8 [Source:HGNC Symbol;Acc:HGNC:24891]"           |             |             |             |
| 182             | -                                                                                | 861         | 861         | 518         |
| 1117            | 5.557273243                                                                      | 5.377241085 | 4.247824078 | 844         |
| 6.181365248     | 8.296162168                                                                      | 6.845640797 |             | 1024        |
| ENSG00000215784 | 176.0066874                                                                      | 137.1742487 | 174.3737475 |             |
| 127.4241249     | 45.65967313                                                                      | 23.29125422 | 162.5182279 |             |
| 65.45835074     | 1.314666811                                                                      | 0.010553361 | 0.072468325 | FAM72D      |
| 1               | 145096000                                                                        | 145112696   | +           | 2397        |
| protein_coding  | family with sequence similarity 72 member D [Source:HGNC Symbol;Acc:HGNC:33593]" |             |             |             |
| 182             | -                                                                                | -           | 194         | 155         |
| 123             | 40                                                                               | 27          | 3.963349573 | 3.064009482 |
| 3.893409387     | 2.851340751                                                                      | 1.025744785 | 0.523753271 |             |
| ENSG00000075618 | 8395.700439                                                                      | 9933.185599 | 12574.67218 |             |
| 12062.81715     | 14343.98631                                                                      | 14304.28065 | 10301.18607 |             |
| 13570.36137     | -0.397808399                                                                     | 0.010562976 | 0.072506199 | FSCN1       |
| 7               | 5592823                                                                          | 5606655     | +           | 3692        |
| protein_coding  | actin-bundling protein 1 [Source:HGNC Symbol;Acc:HGNC:11148]"                    |             |             | fascin      |
| 182             | -                                                                                | -           | -           | -           |
| 9254            | 11224                                                                            | 10817       | 11644       | 12566       |
| 144.049716      | 182.2854413                                                                      | 175.2477893 | 209.2101367 | 16582       |
| 208.8364185     |                                                                                  |             |             | 122.7429301 |
| ENSG00000095002 | 2077.604712                                                                      | 1832.824962 | 1675.150467 |             |
| 1638.902159     | 1280.753831                                                                      | 1242.200225 | 1861.860047 |             |
| 1387.285405     | 0.424983403                                                                      | 0.010600329 | 0.072734378 | MSH2        |
| 2               | 47402969                                                                         | 47663146    | +           | 13777       |

|                                     |                                                   |                                     |             |            |                |             |   |
|-------------------------------------|---------------------------------------------------|-------------------------------------|-------------|------------|----------------|-------------|---|
| protein_coding                      | mutS homolog 2 [Source:HGNC Symbol;Acc:HGNC:7325] |                                     |             |            |                |             |   |
| -                                   | 2290                                              | 2071                                | 1441        | 1582       | 1122           | 1440        |   |
| 8.139720782                         | 7.122818554                                       |                                     | 6.507529852 |            | 6.38063445     |             |   |
| 5.005939064                         | 4.8600289                                         |                                     |             |            |                |             |   |
| ENSG00000263307                     | 0                                                 | 0.884995153                         | 0           |            | 4.14387398     |             |   |
| 13.69790194                         | 15.52750281                                       |                                     | 0.294998384 |            |                |             |   |
| 11.12309291                         | -4.99059528                                       |                                     | 0.010608811 |            | 0.072764351    |             |   |
| AC007216.4                          | 16                                                | 11851649                            |             | 11895611   | +              | 562         |   |
| antisense                           | "novel transcript, antisense to GSPT1"            |                                     |             |            |                | -           |   |
| 0                                   | 1                                                 | 0                                   | 4           | 12         | 18             | 0           |   |
| 0.084312142                         | 0                                                 | 0.395490194                         |             | 1.31247878 |                | 1.489248625 |   |
| ENSG00000072274                     | 9335.61244                                        |                                     | 9500.422969 |            | 8208.35354     |             |   |
| 8749.789908                         | 5544.225809                                       |                                     | 5671.851723 |            | 9014.796316    |             |   |
| 6655.289147                         | 0.437881358                                       |                                     | 0.010614702 |            | 0.072776535    | TFRC        |   |
| 3                                   | 196027183                                         |                                     | 196082189   |            | -              | 7887        |   |
| protein_coding                      | transferrin receptor [Source:HGNC                 |                                     |             |            |                |             |   |
| Symbol;Acc:HGNC:11763]              | -                                                 |                                     | 10290       | 10735      | 7061           | 8446        |   |
| 6575                                | 63.88990134                                       |                                     | 64.49360432 |            | 55.70077236    | 4857        |   |
| 59.50470136                         | 37.85328921                                       |                                     | 38.76278162 |            |                |             |   |
| ENSG00000233966                     | 191.4299538                                       |                                     | 259.3035799 |            | 277.8355043    |             |   |
| 74.58973163                         | 184.9216762                                       |                                     | 125.9453006 |            | 242.856346     |             |   |
| 128.4855695                         | 0.91967388                                        |                                     | 0.010624528 |            | 0.072815682    |             |   |
| UBE2SP1                             | 17                                                | 15704232                            |             | 15704900   | -              | 669         |   |
| processed_pseudogene                | ubiquitin conjugating enzyme E2 S pseudogene 1    |                                     |             |            |                |             |   |
| [Source:HGNC Symbol;Acc:HGNC:30864] | -                                                 |                                     |             |            | 211            | 293         |   |
| 72                                  | 162                                               | 146                                 |             |            | 15.44489717    | 20.75238154 |   |
| 22.2268864                          | 5.980237367                                       |                                     | 14.88456877 |            | 10.14746954    |             |   |
| ENSG00000155111                     | 873.6826802                                       |                                     | 609.7616605 |            | 952.0806613    |             |   |
| 650.5882148                         | 495.4074534                                       |                                     | 508.0943977 |            | 811.8416673    |             |   |
| 551.3633553                         | 0.557409067                                       |                                     | 0.010644993 |            | 0.072927685    | CDK19       |   |
| 6                                   | 110609978                                         |                                     | 110815958   |            | -              | 7492        |   |
| protein_coding                      | cyclin dependent kinase 19 [Source:HGNC           |                                     |             |            |                |             |   |
| Symbol;Acc:HGNC:19338]              | -                                                 |                                     | 963         | 689        | 819            | 628         |   |
| 589                                 | 6.294441505                                       |                                     | 4.357605336 |            | 6.801316412    | 434         |   |
| 4.657725807                         | 3.560732274                                       |                                     | 3.65551478  |            |                |             |   |
| ENSG00000161013                     | 3097.354798                                       |                                     | 3468.296005 |            | 4036.171008    |             |   |
| 2773.287661                         | 2717.892043                                       |                                     | 2772.521892 |            | 3533.940604    |             |   |
| 2754.567198                         | 0.359070247                                       |                                     | 0.010669266 |            | 0.073065681    | MGAT4B      |   |
| 5                                   | 179797597                                         |                                     | 179806952   |            | -              | 5495        |   |
| protein_coding                      | "alpha-1,3-mannosyl-glycoprotein 4-beta-N-        |                                     |             |            |                |             |   |
| acetylglucosaminyltransferase B     | [Source:HGNC Symbol;Acc:HGNC:7048]"               |                                     |             |            |                |             |   |
| -                                   | 3414                                              | 3919                                |             |            | 3472           | 2677        |   |
| 30.42457383                         | 33.79356485                                       |                                     | 39.3114322  |            | 2381           | 3214        |   |
| 26.63416334                         | 27.19626059                                       |                                     |             |            | 27.07027814    |             |   |
| ENSG00000118156                     | 5.443505796                                       |                                     | 15.0449176  |            | 12.78740815    | 0           |   |
| 1.141491828                         | 0                                                 |                                     | 11.09194385 |            | 0.380497276    |             |   |
| 4.941973582                         | 0.010689602                                       |                                     | 0.073176614 |            | ZNF541         | 19          |   |
| 47520685                            | 47555856                                          |                                     | -           | 4655       | protein_coding | zinc        |   |
| finger protein                      | 541                                               | [Source:HGNC Symbol;Acc:HGNC:25294] |             |            |                | zf-C2H2     | 6 |
| 17                                  | 11                                                | 0                                   | 1           | 0          | 0.06311902     |             |   |

|                                    |                                                    |             |                |             |             |             |      |
|------------------------------------|----------------------------------------------------|-------------|----------------|-------------|-------------|-------------|------|
| 0.173043654                        | 0.14702116                                         | 0           | 0.013204674    | 0           |             |             |      |
| ENSG00000248487                    | 147.8819075                                        | 146.0242003 | 181.3486974    |             |             |             |      |
| 224.8051634                        | 280.8069897                                        | 272.5939383 | 158.4182684    |             |             |             |      |
| 259.4020305                        | -0.713488597                                       | 0.010696587 | 0.073196102    |             |             |             |      |
| ABHD14A 3                          | 51971426                                           | 51981199    | +              | 2378        |             |             |      |
| protein_coding                     | abhydrolase domain containing 14A [Source:HGNC     |             |                |             |             |             |      |
| Symbol;Acc:HGNC:24538]             | -                                                  | 163         | 165            | 156         | 217         | 246         |      |
| 316                                | 3.356637465                                        | 3.287748095 | 4.081498063    |             |             |             |      |
| 5.070606715                        | 6.358733402                                        | 6.178830056 |                |             |             |             |      |
| ENSG00000117748                    | 2367.01777                                         | 2492.146351 | 2370.320474    |             |             |             |      |
| 2833.373834                        | 3054.632132                                        | 3202.978775 | 2409.828199    |             |             |             |      |
| 3030.328247                        | -0.33058203                                        | 0.01070348  | 0.073214948    |             |             | RPA2        |      |
| 1                                  | 27891524                                           | 27914746    | -              | 2019        |             |             |      |
| protein_coding                     | replication protein A2 [Source:HGNC                |             |                |             |             |             |      |
| Symbol;Acc:HGNC:10290]             | -                                                  | 2609        | 2816           | 2039        | 2735        | 2676        |      |
| 3713                               | 63.2799961                                         | 66.08802483 | 62.83299386    |             |             |             |      |
| 75.27193065                        | 81.46989383                                        | 85.51053988 |                |             |             |             |      |
| ENSG00000170925                    | 0                                                  | 0           | 1.16249165     | 0           | 21.68834474 |             |      |
| 18.978059                          | 0.387497217                                        | 13.55546791 | -5.274941164   |             |             |             |      |
| 0.010722291                        | 0.07331527                                         | TEX13B X    | 107980864      |             |             |             |      |
| 107982370                          | -                                                  | 1248        | protein_coding | testis      |             |             |      |
| expressed 13B [Source:HGNC         | Symbol;Acc:HGNC:11736]                             |             |                |             | -           | 0           |      |
| 0                                  | 1                                                  | 0           | 19             | 22          | 0           | 0           |      |
| 0.049853111                        | 0                                                  | 0.935807186 | 0.819670139    |             |             |             |      |
| ENSG00000181929                    | 1265.615098                                        | 1364.662526 | 1304.315631    |             |             |             |      |
| 1695.880426                        | 1518.184131                                        | 1957.327994 | 1311.531085    |             |             |             |      |
| 1723.797517                        | -0.394875342                                       | 0.010745597 | 0.073446237    |             |             | PRKAG1      |      |
| 12                                 | 49002274                                           | 49018825    | -              | 4184        |             |             |      |
| protein_coding                     | protein kinase AMP-activated non-catalytic subunit |             |                |             |             |             |      |
| gamma 1 [Source:HGNC               | Symbol;Acc:HGNC:9385]                              |             |                |             | -           | 1395        | 1542 |
| 1122                               | 1637                                               | 1330        | 2269           | 16.3271813  | 17.46301145 |             |      |
| 16.68430144                        | 21.74047593                                        | 19.53922461 | 25.21586311    |             |             |             |      |
| ENSG00000231948                    | 3.629003864                                        | 12.38993214 | 10.46242485    | 0           |             |             |      |
| 0                                  | 0                                                  | 8.827120286 | 0              | 5.574200442 |             |             |      |
| 0.010788231                        | 0.073671844                                        | HS1BP3-IT1  | 2              | 20590775    |             |             |      |
| 20592548                           | -                                                  | 600         | sense_intronic | HS1BP3      |             |             |      |
| intronic transcript 1 [Source:HGNC | Symbol;Acc:HGNC:41474]                             |             |                |             | -           |             |      |
| 4                                  | 14                                                 | 9           | 0              | 0           | 0           | 0.326465599 |      |
| 1.105613228                        | 0.93325023                                         | 0           | 0              | 0           | 0           |             |      |
| ENSG00000166526                    | 520.7620545                                        | 579.6718253 | 505.6838677    |             |             |             |      |
| 654.7320888                        | 785.3463778                                        | 794.4905607 | 535.3725825    |             |             |             |      |
| 744.8563424                        | -0.47600984                                        | 0.010788292 | 0.073671844    |             |             | ZNF3        |      |
| 7                                  | 100064033                                          | 100082548   | -              | 5424        |             |             |      |
| protein_coding                     | zinc finger protein 3 [Source:HGNC                 |             |                |             |             |             |      |
| Symbol;Acc:HGNC:13089]             | zf-C2H2                                            | 574         | 655            | 435         | 632         | 688         |      |
| 921                                | 5.182280248                                        | 5.722002721 | 4.989722838    |             |             |             |      |
| 6.474547793                        | 7.796795037                                        | 7.895342373 |                |             |             |             |      |
| ENSG00000168575                    | 1697.466557                                        | 1736.36049  | 1483.339345    |             |             |             |      |
| 2038.785998                        | 1966.79042                                         | 2411.938771 | 1639.055464    |             |             |             |      |
| 2139.17173                         | -0.384155228                                       | 0.010791099 | 0.073671844    |             |             |             |      |

|                               |      |                                                    |             |             |       |                |
|-------------------------------|------|----------------------------------------------------|-------------|-------------|-------|----------------|
| SLC20A2                       | 8    | 42416475                                           | 42541926    | -           | 6641  |                |
| protein_coding                |      | solute carrier family 20 member 2 [Source:HGNC     |             |             |       |                |
| Symbol;Acc:HGNC:              |      | 10947]                                             | -           | 1871        | 1962  | 1276 1968 1723 |
|                               | 2796 | 13.79650208                                        | 13.99883722 |             |       | 11.95429698    |
| 16.46658944                   |      | 15.9477404                                         | 19.5764845  |             |       |                |
| ENSG00000087263               |      | 1807.243924                                        | 2096.553518 |             |       | 1904.161323    |
| 2182.785619                   |      | 2681.364304                                        | 2672.455762 |             |       | 1935.986255    |
| 2512.201895                   |      | -0.375837624                                       | 0.010809114 |             |       | 0.073766362    |
|                               | 16   | 56451490                                           | 56479100    |             |       | OGFOD1         |
|                               |      |                                                    |             | +           | 5806  |                |
| protein_coding                |      | 2-oxoglutarate and iron dependent oxygenase domain |             |             |       |                |
| containing 1                  |      | [Source:HGNC Symbol;Acc:HGNC:25585]                |             |             | -     | 1992           |
|                               | 2369 | 1638                                               | 2107        | 2349        | 3098  | 16.80122648    |
| 19.3336775                    |      | 17.5526912                                         | 20.16506136 |             |       | 24.86871501    |
| 24.81049334                   |      |                                                    |             |             |       |                |
| ENSG00000181830               |      | 797.4735991                                        | 938.9798575 |             |       | 1049.72996     |
| 1147.853092                   |      | 1353.809308                                        | 1261.178284 |             |       | 928.7278055    |
| 1254.280228                   |      | -0.434204498                                       | 0.010835953 |             |       | 0.073921009    |
| SLC35C1                       | 11   | 45804072                                           | 45813015    |             |       | + 4505         |
| protein_coding                |      | solute carrier family 35 member C1 [Source:HGNC    |             |             |       |                |
| Symbol;Acc:HGNC:              |      | 20197]                                             | -           | 879         | 1061  | 903 1108 1186  |
|                               | 1462 | 9.554825574                                        | 11.15955892 |             |       | 12.47095757    |
| 13.66649065                   |      | 16.18218843                                        | 15.08980388 |             |       |                |
| ENSG00000120942               |      | 1161.281236                                        | 1439.002119 |             |       | 1119.479459    |
| 1474.183168                   |      | 1767.02935                                         | 1731.316564 |             |       | 1239.920938    |
| 1657.509694                   |      | -0.4182195                                         | 0.010847431 |             |       | 0.073963832    |
|                               | 1    | 11273206                                           | 11296049    |             |       | UBIAD1         |
|                               |      |                                                    |             | +           | 5082  |                |
| protein_coding                |      | UbiA prenyltransferase domain containing 1         |             |             |       |                |
| [Source:HGNC Symbol;Acc:HGNC: |      | 30791]                                             | -           | 1280        | 1626  | 963            |
|                               | 1423 | 1548                                               | 2007        | 12.33400137 |       | 15.16045799    |
| 11.78958378                   |      | 15.55902157                                        | 18.72335431 |             |       | 18.36300405    |
| ENSG00000134684               |      | 3971.037478                                        | 4963.052819 |             |       | 5200.987642    |
| 5518.604172                   |      | 6250.809251                                        | 6396.468521 |             |       | 4711.692646    |
| 6055.293981                   |      | -0.362163412                                       | 0.010850593 |             |       | 0.073963832    |
|                               | 1    | 32775237                                           | 32818153    |             |       | YARS           |
|                               |      |                                                    |             | -           | 8212  |                |
| protein_coding                |      | tyrosyl-tRNA synthetase [Source:HGNC               |             |             |       |                |
| Symbol;Acc:HGNC:              |      | 12840]                                             | -           | 4377        | 5608  | 4474 5327 5476 |
|                               | 7415 | 26.10094848                                        | 32.35828569 |             |       | 33.89642417    |
| 36.0450639                    |      | 40.9884843                                         | 41.9849106  |             |       |                |
| ENSG00000105778               |      | 1753.716117                                        | 1753.175398 |             |       | 1614.700902    |
| 2267.735035                   |      | 2481.603234                                        | 1922.822432 |             |       | 1707.197472    |
| 2224.053567                   |      | -0.380829801                                       | 0.010868926 |             |       | 0.0740296      |
|                               | 7    | 32495426                                           | 32588721    |             |       | AVL9           |
|                               |      |                                                    |             | +           | 14757 |                |
| protein_coding                |      | AVL9 cell migration associated [Source:HGNC        |             |             |       |                |
| Symbol;Acc:HGNC:              |      | 28994]                                             | -           | 1933        | 1981  | 1389 2189 2174 |
|                               | 2229 | 6.414494843                                        | 6.360816091 |             |       | 5.856134126    |
| 8.242514654                   |      | 9.055424681                                        | 7.023328942 |             |       |                |
| ENSG00000164758               |      | 407.3556837                                        | 460.1974796 |             |       | 442.9093186    |
| 314.9344225                   |      | 324.1836792                                        | 222.5608737 |             |       | 436.8208273    |
| 287.2263251                   |      | 0.606922831                                        | 0.010871596 |             |       | 0.0740296      |
|                               | 8    | 117520713                                          | 117540262   |             |       | MED30          |
|                               |      |                                                    |             | +           | 1440  |                |



|                                             |                                                        |             |             |             |                |
|---------------------------------------------|--------------------------------------------------------|-------------|-------------|-------------|----------------|
|                                             | 350.2688003                                            | 393.8315971 | 382.9140449 | 488.0995161 |                |
|                                             | 470.0912567                                            |             |             |             |                |
| ENSG00000148110                             | 1709.26082                                             | 1637.241033 | 1665.850534 |             |                |
| 1328.11161                                  | 1408.600916                                            | 979.9579554 | 1670.784129 |             |                |
| 1238.890161                                 | 0.432424276                                            | 0.010920428 | 0.074158532 |             |                |
| MFS14B 9                                    | 94374551                                               | 94461042    | +           | 3428        |                |
| protein_coding                              | major facilitator superfamily domain containing        |             |             | 14B         |                |
| [Source:HGNC Symbol;Acc:HGNC:23376]         | -                                                      | 1884        | 1850        | 1433        |                |
| 1282                                        | 1234                                                   | 1136        | 26.91341256 | 25.57156782 |                |
| 26.00831544                                 | 20.78065612                                            | 22.12695775 | 15.40879    |             |                |
| ENSG00000185049                             | 731.2442786                                            | 806.2305845 | 916.0434201 |             |                |
| 983.1341017                                 | 1073.002318                                            | 1323.288295 | 817.8394277 |             |                |
| 1126.474905                                 | -0.463316834                                           | 0.01092108  | 0.074158532 |             | NELFA          |
| 4                                           | 1982714                                                | 2041903     | -           | 5935        | protein_coding |
| negative elongation factor complex member A | [Source:HGNC                                           |             |             |             |                |
| Symbol;Acc:HGNC:12768]                      | -                                                      | 806         | 911         | 788         | 949            |
| 1534                                        | 6.650327027                                            | 7.273175959 | 8.260614224 |             | 940            |
| 8.885002059                                 | 9.735415475                                            | 12.0180956  |             |             |                |
| ENSG00000213204                             | 0                                                      | 2.654985459 | 0           | 21.75533839 |                |
| 12.55641011                                 | 12.07694663                                            | 0.884995153 |             |             |                |
| 15.46289838                                 | -4.063103384                                           | 0.010947296 | 0.074278531 |             |                |
| AL049697.1                                  | 6                                                      | 87408012    | 87511634    | +           | 3530           |
| protein_coding                              | "novel transcript, C6orf165-SLC35A1                    |             |             |             |                |
| readthrough"                                | -                                                      | 0           | 3           | 0           | 21             |
| 0                                           | 0.040269199                                            | 0           | 0.33056482  | 0.191542583 | 14             |
| 0.184409949                                 |                                                        |             |             |             |                |
| ENSG00000133895                             | 1253.820835                                            | 1444.31209  | 1428.702238 |             |                |
| 1544.629026                                 | 1841.226319                                            | 2120.366773 | 1375.611721 |             |                |
| 1835.407373                                 | -0.416547004                                           | 0.010953353 | 0.074278531 |             | MEN1           |
| 11                                          | 64803510                                               | 64811294    | -           | 4246        |                |
| protein_coding                              | menin 1 [Source:HGNC Symbol;Acc:HGNC:7010]             |             |             | -           |                |
| 1382                                        | 1632                                                   | 1229        | 1491        | 1613        | 2458           |
| 18.2123759                                  | 18.00854974                                            | 19.51235538 | 23.35079858 |             |                |
| 26.91738751                                 |                                                        |             |             |             |                |
| ENSG00000104324                             | 331.1466026                                            | 398.2478189 | 556.8335003 |             |                |
| 304.5747375                                 | 214.6004637                                            | 282.0829678 | 428.7426406 |             |                |
| 267.0860563                                 | 0.680046443                                            | 0.010954626 | 0.074278531 |             | CPQ            |
| 8                                           | 96645227                                               | 97149654    | +           | 3457        |                |
| protein_coding                              | carboxypeptidase Q [Source:HGNC Symbol;Acc:HGNC:16910] |             |             |             |                |
| -                                           | 365                                                    | 450         | 479         | 294         | 188            |
| 5.170376494                                 | 6.167931971                                            | 8.620708904 | 4.725633042 |             |                |
| 3.342764874                                 | 4.398244733                                            |             |             |             |                |
| ENSG00000120705                             | 4691.394745                                            | 4842.693478 | 4590.679525 |             |                |
| 5490.633023                                 | 5809.051914                                            | 6148.891115 | 4708.255916 |             |                |
| 5816.192017                                 | -0.304893833                                           | 0.010955548 | 0.074278531 |             | ETF1           |
| 5                                           | 138506095                                              | 138543300   | -           | 4601        |                |
| protein_coding                              | eukaryotic translation termination factor 1            |             |             |             |                |
| [Source:HGNC Symbol;Acc:HGNC:3477]          | -                                                      | 5171        | 5472        | 3949        |                |
| 5300                                        | 5089                                                   | 7128        | 55.03652288 | 56.35342239 |                |
| 53.40006026                                 | 64.00820967                                            | 67.98726612 | 72.03548357 |             |                |

|                                                               |                                                |             |             |                |                |             |
|---------------------------------------------------------------|------------------------------------------------|-------------|-------------|----------------|----------------|-------------|
| ENSG00000227057                                               | 3398.562119                                    | 4268.331623 | 3452.6002   |                |                |             |
| 4059.960532                                                   | 4764.586891                                    | 6079.017352 | 3706.497981 |                |                |             |
| 4967.854925                                                   | -0.422640884                                   | 0.010983723 | 0.074441024 | WDR46          |                |             |
| 6                                                             | 33279108                                       | 33289527    | -           | 3115           |                |             |
| protein_coding                                                | WD repeat domain 46 [Source:HGNC               |             |             |                |                |             |
| Symbol;Acc:HGNC:13923]                                        | -                                              | 3746        | 4823        | 2970           | 3919           | 4174        |
| 7047                                                          | 58.88957304                                    | 73.36444758 | 59.32056037 |                |                |             |
| 69.90838288                                                   | 82.36482005                                    | 105.1906742 |             |                |                |             |
| ENSG00000146197                                               | 50.80605409                                    | 51.32971888 | 41.8496994  | 0              |                |             |
| 13.69790194                                                   | 16.39014186                                    | 47.99515746 | 10.02934793 |                |                |             |
| 2.25344737                                                    | 0.011047079                                    | 0.074841741 | SCUBE3      | 6              |                |             |
| 35214419                                                      | 35253079                                       | +           | 7356        | protein_coding |                |             |
| "signal peptide, CUB domain and EGF like domain containing 3  |                                                |             |             |                |                |             |
| [Source:HGNC Symbol;Acc:HGNC:13655]"                          | -                                              | 56          | 58          | 36             |                |             |
| 0                                                             | 12                                             | 19          | 0.372799216 | 0.373605029    |                |             |
| 0.304486209                                                   | 0                                              | 0.100273664 | 0.12009997  |                |                |             |
| ENSG00000169020                                               | 109.7773669                                    | 275.2334926 | 185.998664  |                |                |             |
| 88.05732207                                                   | 113.007691                                     | 86.26390453 | 190.3365078 |                |                |             |
| 95.77630586                                                   | 0.992794223                                    | 0.011073588 | 0.074992611 | ATP5ME         |                |             |
| 4                                                             | 672436                                         | 674338      | -           | 940            | protein_coding | ATP         |
| synthase membrane subunit e [Source:HGNC Symbol;Acc:HGNC:846] |                                                |             |             |                |                |             |
| 121                                                           | 311                                            | 160         | 85          | 99             | 100            | 6.303564489 |
| 15.67685626                                                   | 10.59007353                                    | 5.024618763 | 6.473731772 |                |                |             |
| 4.94655867                                                    |                                                |             |             |                |                |             |
| ENSG00000169359                                               | 341.1263632                                    | 389.3978674 | 374.3223113 |                |                |             |
| 651.6241833                                                   | 414.3615336                                    | 587.4571898 | 368.2821806 |                |                |             |
| 551.1476356                                                   | -0.582595443                                   | 0.011130359 | 0.075324961 |                |                |             |
| SLC33A1                                                       | 3                                              | 155821024   | 155854456   | -              | 10040          |             |
| protein_coding                                                | solute carrier family 33 member 1 [Source:HGNC |             |             |                |                |             |
| Symbol;Acc:HGNC:95]                                           | -                                              | 376         | 440         | 322            | 629            | 363         |
| 681                                                           | 1.833930257                                    | 2.076564401 | 1.995395578 |                |                |             |
| 3.481200011                                                   | 2.222389991                                    | 3.153874569 |             |                |                |             |
| ENSG00000184602                                               | 245.8650118                                    | 192.9289434 | 289.4604208 |                |                |             |
| 114.9925029                                                   | 189.4876435                                    | 53.48362081 | 242.7514587 |                |                |             |
| 119.3212557                                                   | 1.029017514                                    | 0.011132922 | 0.075324961 | SNN            |                |             |
| 16                                                            | 11668414                                       | 11679159    | +           | 3312           |                |             |
| protein_coding                                                | stannin [Source:HGNC Symbol;Acc:HGNC:11149]    |             |             |                |                |             |
| 271                                                           | 218                                            | 249         | 111         | 166            | 62             | 4.006892088 |
| 3.118836487                                                   | 4.677522288                                    | 1.862278779 | 3.080811453 |                |                |             |
| 0.870427051                                                   |                                                |             |             |                |                |             |
| ENSG00000131467                                               | 5660.338777                                    | 5743.618544 | 5951.957247 |                |                |             |
| 6306.976197                                                   | 7992.725781                                    | 7557.580676 | 5785.304856 |                |                |             |
| 7285.760884                                                   | -0.332717076                                   | 0.011141015 | 0.075324961 | PSME3          |                |             |
| 17                                                            | 42824385                                       | 42843758    | +           | 5152           |                |             |
| protein_coding                                                | proteasome activator subunit 3 [Source:HGNC    |             |             |                |                |             |
| Symbol;Acc:HGNC:9570]                                         | -                                              | 6239        | 6490        | 5120           | 6088           | 7002        |
| 8761                                                          | 59.30179168                                    | 59.68913473 | 61.83024299 |                |                |             |
| 65.66150504                                                   | 83.53983483                                    | 79.06947298 |             |                |                |             |
| ENSG00000038002                                               | 364.7148883                                    | 362.8480128 | 389.4347027 |                |                |             |
| 242.4166278                                                   | 218.0249392                                    | 276.9071335 | 372.3325346 |                |                |             |



|                                                                  |                                              |                            |                 |             |
|------------------------------------------------------------------|----------------------------------------------|----------------------------|-----------------|-------------|
| 245.7829002                                                      | 0.597170708                                  | 0.011141805                | 0.075324961     | AGA         |
| 4                                                                | 177430770                                    | 177442503                  | - 2675          |             |
| protein_coding                                                   | aspartylglucosaminidase [Source:HGNC         |                            |                 |             |
| Symbol;Acc:HGNC:318]                                             | -                                            | 402 410                    | 335 234         | 191         |
| 321                                                              | 7.359205836                                  | 7.262506117                | 7.791621859     |             |
| 4.860759288                                                      | 4.388912687                                  | 5.57971818                 |                 |             |
| ENSG00000187713                                                  | 958.0570201                                  | 1111.553912                | 990.4428857     |             |
| 1294.960619                                                      | 1443.987163                                  | 1287.920095                | 1020.017939     |             |
| 1342.289292                                                      | -0.395541176                                 | 0.011143955                | 0.075324961     |             |
| TMEM203 9                                                        | 137204082                                    | 137205638                  | - 1557          |             |
| protein_coding                                                   | transmembrane protein 203 [Source:HGNC       |                            |                 |             |
| Symbol;Acc:HGNC:28217]                                           | -                                            | 1056 1256                  | 852 1250        | 1265        |
| 1493                                                             | 33.2126852                                   | 38.22323739                | 34.045352       |             |
| 44.6101254                                                       | 49.94008453                                  | 44.58638002                |                 |             |
| ENSG00000264268                                                  | 5.443505796                                  | 8.849951531                | 11.6249165      | 0           |
| 0                                                                | 0                                            | 8.639457942 0              | 5.542076885     |             |
| 0.011162978                                                      | 0.075424721                                  | MIR4767 X                  | 7147860 7147937 | +           |
| 78                                                               | miRNA                                        | microRNA 4767 [Source:HGNC |                 |             |
| Symbol;Acc:HGNC:41548]                                           | -                                            | 6 10                       | 10 0            | 0           |
| 0                                                                | 3.766910756                                  | 6.074797956                | 7.976497693     | 0           |
| 0                                                                | 0                                            |                            |                 |             |
| ENSG00000284052                                                  | 7.258007728                                  | 6.194966072                | 9.299933199     |             |
| 40.4027713                                                       | 13.69790194                                  | 49.17042558                | 7.584302333     |             |
| 34.42369961                                                      | -2.192820171                                 | 0.011173705                | 0.075468371     |             |
| AC006460.2                                                       | 2                                            | 190607660                  | 190649840       | - 7811      |
|                                                                  | bidirectional_promoter_lncRNA                | novel transcript           |                 | -           |
| 8                                                                | 7                                            | 8                          | 39              | 12 57       |
| 0.042463701                                                      | 0.063722117                                  | 0.277440599                | 0.050154746     | 0.094432605 |
| 0.339312013                                                      |                                              |                            |                 |             |
| ENSG00000122591                                                  | 2361.574264                                  | 1995.66407                 | 2056.447729     |             |
| 1618.182789                                                      | 1810.406039                                  | 1517.382081                | 2137.895354     |             |
| 1648.65697                                                       | 0.375461207                                  | 0.011230969                | 0.075826189     |             |
| FAM126A 7                                                        | 22889371                                     | 23014130                   | - 14499         |             |
| protein_coding                                                   | family with sequence similarity 126 member A |                            |                 |             |
| [Source:HGNC Symbol;Acc:HGNC:24587]                              | -                                            |                            | 2603 2255       | 1769        |
| 1562                                                             | 1586 1759                                    | 8.79153687                 | 7.369447634     |             |
| 7.590958719                                                      | 5.986252388                                  | 6.723764492                | 5.641035174     |             |
| ENSG00000139579                                                  | 1418.03326                                   | 1525.731644                | 1383.365063     |             |
| 1173.752305                                                      | 1149.482271                                  | 965.2930917                | 1442.376656     |             |
| 1096.175889                                                      | 0.396830987                                  | 0.011235823                | 0.075830014     | NABP2       |
| 12                                                               | 56222015                                     | 56229854                   | + 2218          |             |
| protein_coding                                                   | nucleic acid binding protein 2 [Source:HGNC  |                            |                 |             |
| Symbol;Acc:HGNC:28412]                                           | -                                            | 1563 1724                  | 1190 1133       | 1007        |
| 1119                                                             | 34.508503                                    | 36.83003745                | 33.38045608     |             |
| 28.38444531                                                      | 27.90713729                                  | 23.45846349                |                 |             |
| ENSG00000135324                                                  | 3.629003864                                  | 18.58489822                | 4.6499666       | 0           |
| 0                                                                | 0                                            | 8.954622893 0              | 5.598761953     |             |
| 0.011275872                                                      | 0.076059982                                  | MRAP2 6                    | 84033756        |             |
| 84090881                                                         | + 2153                                       | protein_coding             | melanocortin 2  |             |
| receptor accessory protein 2 [Source:HGNC Symbol;Acc:HGNC:21232] |                                              |                            |                 |             |

|                                                      |                                                                       |             |             |       |                |             |        |
|------------------------------------------------------|-----------------------------------------------------------------------|-------------|-------------|-------|----------------|-------------|--------|
| -                                                    | 4                                                                     | 21          | 4           | 0     | 0              | 0           |        |
| 0.09097973                                           | 0.462169951                                                           |             | 0.115590677 |       | 0              | 0           | 0      |
| ENSG00000126698                                      | 3754.204497                                                           |             | 4047.96783  |       | 4095.458083    |             |        |
| 3439.415403                                          | 3169.922807                                                           |             | 2775.109809 |       | 3965.876803    |             |        |
| 3128.14934                                           | 0.342502604                                                           |             | 0.011278497 |       | 0.076059982    |             | DNAJC8 |
| 1                                                    | 28199456                                                              |             | 28233025    |       | -              | 2888        |        |
| protein_coding                                       | DnaJ heat shock protein family (Hsp40) member C8                      |             |             |       |                |             |        |
| [Source:HGNC Symbol;Acc:HGNC:15470]                  |                                                                       |             | -           |       | 4138           | 4574        | 3523   |
| 3320                                                 | 2777                                                                  | 3217        | 70.1652345  |       | 75.04563076    |             |        |
| 75.8965965                                           | 63.87823951                                                           |             | 59.10524897 |       | 51.7946485     |             |        |
| ENSG00000116288                                      | 2405.122311                                                           |             | 3127.572871 |       | 3180.577154    |             |        |
| 2121.663478                                          | 2425.670135                                                           |             | 2102.251353 |       | 2904.424112    |             |        |
| 2216.528322                                          | 0.389970358                                                           |             | 0.011288125 |       | 0.076095898    |             | PARK7  |
| 1                                                    | 7954291                                                               | 7985505     | +           | 2397  | protein_coding |             |        |
| Parkinsonism associated deglycase                    | [Source:HGNC Symbol;Acc:HGNC:16369]                                   |             |             |       |                |             |        |
| -                                                    | 2651                                                                  | 3534        | 2736        | 2048  | 2125           | 2437        |        |
| 54.15896762                                          | 69.85941619                                                           |             | 71.01578722 |       | 47.47598259    |             |        |
| 54.49269168                                          | 47.27358227                                                           |             |             |       |                |             |        |
| ENSG00000229931                                      | 9.07250966                                                            |             | 6.194966072 |       | 10.46242485    |             | 0      |
| 0                                                    | 0                                                                     | 8.576633527 | 0           |       | 5.532101043    |             |        |
| 0.011311621                                          | 0.076193867                                                           |             | AL137003.1  |       | 6              | 16761138    |        |
| 16762652                                             | +                                                                     | 698         | antisense   |       |                |             |        |
| uncharacterized LOC101928433                         | [Source:NCBI gene;Acc:101928433]                                      |             |             |       |                |             | -      |
| 10                                                   | 7                                                                     | 9           | 0           | 0     | 0              | 0.701573637 |        |
| 0.475191932                                          | 0.802220828                                                           |             | 0           |       | 0              | 0           |        |
| ENSG00000106263                                      | 13355.64147                                                           |             | 15639.63435 |       | 14593.92017    |             |        |
| 15344.76535                                          | 19567.45292                                                           |             | 20956.95297 |       | 14529.732      |             |        |
| 18623.05708                                          | -0.358110019                                                          |             | 0.011313429 |       | 0.076193867    |             | EIF3B  |
| 7                                                    | 2354086                                                               | 2380745     | +           | 8998  | protein_coding |             |        |
| eukaryotic translation initiation factor 3 subunit B | [Source:HGNC Symbol;Acc:HGNC:3280]                                    |             |             |       |                |             |        |
| -                                                    |                                                                       |             | 14721       | 17672 | 12554          | 14812       | 17142  |
| 24294                                                | 80.11613827                                                           |             | 93.06066569 |       | 86.80464835    |             |        |
| 91.47022728                                          | 117.1016089                                                           |             | 125.5405585 |       |                |             |        |
| ENSG00000026025                                      | 41904.10762                                                           |             | 46190.55203 |       | 53097.9686     |             |        |
| 64185.50004                                          | 61294.6867                                                            |             | 52830.60305 |       | 47064.20941    |             |        |
| 59436.92993                                          | -0.336741605                                                          |             | 0.01131558  |       | 0.076193867    |             | VIM    |
| 10                                                   | 17228259                                                              |             | 17237593    |       | +              | 5158        |        |
| protein_coding                                       | vimentin [Source:HGNC Symbol;Acc:HGNC:12692]                          |             |             |       |                |             | -      |
| 46188                                                | 52193                                                                 | 45676       | 61957       | 53697 | 61243          | 438.5069721 |        |
| 479.4655005                                          | 550.9517579                                                           |             | 667.4536104 |       | 639.9057979    |             |        |
| 552.0852406                                          |                                                                       |             |             |       |                |             |        |
| ENSG00000142544                                      | 644.1481858                                                           |             | 964.6447169 |       | 604.4956579    |             |        |
| 744.8613478                                          | 1447.411638                                                           |             | 1225.810083 |       | 737.7628536    |             |        |
| 1139.361023                                          | -0.626071526                                                          |             | 0.011320729 |       | 0.076199535    |             | CTU1   |
| 19                                                   | 51097606                                                              |             | 51108370    |       | -              | 2087        |        |
| protein_coding                                       | cytosolic thiouridylase subunit 1 [Source:HGNC Symbol;Acc:HGNC:29590] |             |             |       |                |             |        |
| -                                                    |                                                                       |             | 710         | 1090  | 520            | 719         | 1268   |
| 1421                                                 | 16.65960052                                                           |             | 24.74745195 |       | 15.50200031    |             |        |
| 19.14337404                                          | 37.34600617                                                           |             | 31.6593976  |       |                |             |        |
| ENSG00000251520                                      | 1.814501932                                                           |             | 8.849951531 |       | 0              | 15.53952742 |        |

|                                                                     |                                                                                       |                                     |             |                        |                |
|---------------------------------------------------------------------|---------------------------------------------------------------------------------------|-------------------------------------|-------------|------------------------|----------------|
|                                                                     | 12.55641011                                                                           | 58.65945508                         | 3.554817821 | 28.9184642             |                |
|                                                                     | -2.995666752                                                                          | 0.011345804                         | 0.076339268 | AL162431.3             |                |
|                                                                     | 1                                                                                     | 180964511                           | 180965909   | +                      | 537            |
| unprocessed_pseudogene                                              | "pseudogene similar to part of major histocompatibility complex, class I-related MR1" |                                     |             |                        | 2              |
|                                                                     | 10                                                                                    | 0                                   | 15          | 11                     | 68             |
|                                                                     | 0.882372887                                                                           | 0                                   | 1.552133302 | 1.259116049            | 5.887970767    |
| ENSG00000167785                                                     | 43.54804637                                                                           |                                     | 36.28480128 | 109.2742151            |                |
| 29.00711786                                                         | 7.990442797                                                                           | 0                                   | 63.03568758 | 12.33252022            |                |
|                                                                     | 2.359489857                                                                           | 0.011358328                         | 0.076379372 | ZNF558                 | 19             |
|                                                                     | 8806170                                                                               | 8832328                             | -           | 8184                   | protein_coding |
| protein                                                             | 558                                                                                   | [Source:HGNC Symbol;Acc:HGNC:26422] | zf-C2H2     | 48                     | 41             |
|                                                                     | 94                                                                                    | 28                                  | 7           | 0                      | 0.287213137    |
|                                                                     | 0.714609984                                                                           | 0.190109778                         | 0.05257506  | 0                      | 0.237380301    |
| ENSG00000218809                                                     | 0                                                                                     | 0                                   | 0           | 10.35968495            | 3.424475485    |
|                                                                     | 12.07694663                                                                           | 0                                   | 8.620369022 | -5.586446251           |                |
| 0.011360401                                                         | 0.076379372                                                                           | AL391903.1                          | 6           | 41269875               |                |
|                                                                     | 41270239                                                                              | -                                   | 365         | unprocessed_pseudogene |                |
| triggering receptor expressed on myeloid cells 1 (TREM1) pseudogene | -                                                                                     | 0                                   | 0           | 10                     | 3              |
|                                                                     | 0                                                                                     | 0                                   | 1.522366362 | 0.505214435            | 14             |
| ENSG00000115738                                                     | 110.6846178                                                                           |                                     | 114.1643748 | 165.0738143            | 0              |
| 211.337573                                                          | 181.4972007                                                                           |                                     | 301.0610268 | 129.974269             |                |
| 231.2986001                                                         | -0.836832542                                                                          | 0.011365923                         | 0.076387466 | ID2                    |                |
|                                                                     | 2                                                                                     | 8678845                             | 8684453     | +                      | 2205           |
| inhibitor of DNA binding 2 [Source:HGNC Symbol;Acc:HGNC:5361]       |                                                                                       |                                     |             | protein_coding         | bHLH           |
|                                                                     | 122                                                                                   | 129                                 | 142         | 204                    | 159            |
|                                                                     | 2.772091475                                                                           | 4.006697889                         | 5.140834435 | 349                    | 2.709442385    |
|                                                                     | 7.359492233                                                                           |                                     |             | 4.432368816            |                |
| ENSG00000129351                                                     | 14473.37466                                                                           |                                     | 13819.19932 | 13982.44956            |                |
| 11964.40015                                                         | 10135.30594                                                                           |                                     | 12059.69385 | 14091.67451            |                |
| 11386.46665                                                         | 0.307441127                                                                           |                                     | 0.011371695 | 0.076397231            | ILF3           |
|                                                                     | 19                                                                                    | 10654261                            | 10692417    | +                      | 11022          |
| protein_coding                                                      | interleukin enhancer binding factor 3 [Source:HGNC Symbol;Acc:HGNC:6038]              |                                     |             |                        | -              |
|                                                                     | 13980                                                                                 | 70.87786743                         | 67.12866691 | 67.89532309            | 12028          |
|                                                                     | 58.22319294                                                                           | 49.51662198                         | 58.97633533 | 11549                  | 8879           |
| ENSG00000118418                                                     | 653.2206955                                                                           |                                     | 707.9961225 | 570.7834001            |                |
| 430.9628939                                                         | 525.086241                                                                            |                                     | 391.6381266 | 644.0000727            |                |
| 449.2290871                                                         | 0.521760612                                                                           |                                     | 0.011390318 | 0.076493294            | HMGN3          |
|                                                                     | 6                                                                                     | 79201245                            | 79234738    | -                      | 1014           |
| protein_coding                                                      | high mobility group nucleosomal binding domain 3 [Source:HGNC Symbol;Acc:HGNC:12312]  |                                     |             |                        | Others         |
|                                                                     | 416                                                                                   | 460                                 | 454         | 34.7714839             | 720            |
|                                                                     | 30.12661821                                                                           | 22.79646039                         | 27.88478093 | 20.81847513            | 800            |
| ENSG00000188985                                                     | 362.9003864                                                                           |                                     | 330.9881873 | 335.9600868            | 491            |
| 245.5245333                                                         | 236.2888084                                                                           |                                     | 98.34085116 | 343.2828868            |                |
| 193.384731                                                          | 0.831452922                                                                           |                                     | 0.011403935 | 0.076555674            | DHFRP1         |
|                                                                     | 18                                                                                    | 26170726                            | 26171284    | -                      | 559            |
| processed_pseudogene                                                | dihydrofolate reductase pseudogene 1                                                  |                                     |             |                        |                |

|                                    |                                                   |                                      |             |              |
|------------------------------------|---------------------------------------------------|--------------------------------------|-------------|--------------|
| [Source:HGNC Symbol;Acc:HGNC:2862] | -                                                 | 400                                  | 374         | 289          |
| 237                                | 207                                               | 114                                  | 35.04103029 | 31.70196887  |
| 32.1656907                         | 23.55855136                                       | 22.76176304                          | 9.482526424 |              |
| ENSG00000137720                    | 322.9813439                                       | 341.6081291                          | 337.1225785 |              |
| 560.4589557                        | 430.3424192                                       | 470.1382797                          | 333.9040172 |              |
| 486.9798849                        | -0.544693346                                      | 0.011448679                          | 0.076826887 |              |
| C11orf1                            | 11                                                | 111878935                            | 111885975   | + 3831       |
| protein_coding                     | chromosome 11 open reading frame 1                | [Source:HGNC                         |             |              |
| Symbol;Acc:HGNC:1163]              | -                                                 | 356                                  | 386         | 290 541 377  |
| 545                                | 4.550577651                                       | 4.774210829                          | 4.709694018 |              |
| 7.846882632                        | 6.048902139                                       | 6.614779449                          |             |              |
| ENSG00000205534                    | 201.4097144                                       | 185.8489822                          | 44.1746827  |              |
| 59.05020421                        | 7.990442797                                       | 71.59904076                          | 143.8111264 |              |
| 46.21322925                        | 1.633763151                                       | 0.011497203                          | 0.077123258 | SMG1P2       |
| 16                                 | 29527568                                          | 29594966                             | - 4221      |              |
| unprocessed_pseudogene             | SMG1 pseudogene 2                                 | [Source:HGNC                         |             |              |
| Symbol;Acc:HGNC:49859]             | -                                                 | 222                                  | 210         | 38 57 7      |
| 83                                 | 2.575528179                                       | 2.357384281                          | 0.560112276 |              |
| 0.750363235                        | 0.101936577                                       | 0.914310608                          |             |              |
| ENSG00000198887                    | 1485.169831                                       | 1256.693117                          | 1128.779392 |              |
| 1144.745187                        | 745.3941638                                       | 857.463211                           | 1290.214114 |              |
| 915.8675206                        | 0.494664851                                       | 0.011508048                          | 0.07716674  | SMC5         |
| 9                                  | 70258962                                          | 70354888                             | + 6637      |              |
| protein_coding                     | structural maintenance of chromosomes 5           | [Source:HGNC                         |             |              |
| Symbol;Acc:HGNC:20465]             | -                                                 | 1637                                 | 1420        | 971 1105 653 |
| 994                                | 12.07829257                                       | 10.13778246                          | 9.102365259 |              |
| 9.251294453                        | 6.047678893                                       | 6.963788698                          |             |              |
| ENSG00000140365                    | 1013.399329                                       | 1319.527773                          | 1369.415164 |              |
| 815.3072055                        | 852.6943956                                       | 1023.089908                          | 1234.114089 |              |
| 897.0305029                        | 0.459148607                                       | 0.011512983                          | 0.077170578 | COMMD4       |
| 15                                 | 75335891                                          | 75343224                             | + 6779      |              |
| protein_coding                     | COMM domain containing 4                          | [Source:HGNC                         |             |              |
| Symbol;Acc:HGNC:26027]             | -                                                 | 1117                                 | 1491        | 1178 787 747 |
| 1186                               | 8.068935107                                       | 10.42169719                          | 10.8115137  |              |
| 6.450912365                        | 6.77333145                                        | 8.134859814                          |             |              |
| ENSG00000083520                    | 3472.956698                                       | 3520.510719                          | 2720.230461 |              |
| 4586.232527                        | 4293.150766                                       | 3742.128178                          | 3237.899293 |              |
| 4207.17049                         | -0.377246568                                      | 0.011521542                          | 0.077198695 | DIS3         |
| 13                                 | 72752169                                          | 72782096                             | - 10835     |              |
| protein_coding                     | "DIS3 homolog, exosome endoribonuclease and 3'-5' | [Source:HGNC Symbol;Acc:HGNC:20604]" |             |              |
| exoribonuclease                    |                                                   |                                      |             | - 3828       |
| 3978                               | 2340 4427                                         | 3761 4338                            | 17.30101955 |              |
| 17.39651693                        | 13.43673612                                       | 22.70349144                          | 21.33643112 |              |
| 18.61622632                        |                                                   |                                      |             |              |
| ENSG00000260643                    | 46.26979926                                       | 39.82478189                          | 33.71225785 |              |
| 66.30198367                        | 98.16829722                                       | 111.2804368                          | 39.935613   |              |
| 91.91690591                        | -1.200881902                                      | 0.011542621                          | 0.077310648 |              |
| AC092718.3                         | 16                                                | 81053587                             | 81096296    | - 3177       |
| protein_coding                     | novel protein                                     | -                                    | 51 45       | 29           |
| 64                                 | 86                                                | 129                                  | 0.786106966 | 0.671153315  |

|                                       |                                                     |             |             |             |               |
|---------------------------------------|-----------------------------------------------------|-------------|-------------|-------------|---------------|
| 0.56792061                            | 1.119372937                                         | 1.663905268 | 1.888006624 |             |               |
| ENSG00000121895                       | 3.629003864                                         | 23.89486913 | 2.3249833   |             |               |
| 85.98538508                           | 22.82983656                                         | 38.81875704 | 9.949618766 |             |               |
| 49.21132623                           | -2.289720917                                        | 0.011563135 | 0.077418736 |             |               |
| TMEM156 4                             | 38966744                                            | 39032922    | -           | 2562        |               |
| protein_coding                        | transmembrane protein 156 [Source:HGNC              |             |             |             |               |
| Symbol;Acc:HGNC:26260]                | -                                                   | 4           | 27          | 2           | 83 20         |
| 45                                    | 0.076455644                                         | 0.499356928 | 0.048568838 |             |               |
| 1.800159599                           | 0.479841969                                         | 0.816703481 |             |             |               |
| ENSG00000127990                       | 921.7669814                                         | 725.6960256 | 886.9811289 |             |               |
| 729.3218204                           | 569.6044223                                         | 391.6381266 | 844.814712  |             |               |
| 563.5214564                           | 0.585118205                                         | 0.011570729 | 0.077440265 |             | SGCE          |
| 7                                     | 94524204                                            | 94656572    | -           | 20884       |               |
| protein_coding                        | sarcoglycan epsilon [Source:HGNC                    |             |             |             |               |
| Symbol;Acc:HGNC:10808]                | -                                                   | 1016        | 820         | 763         | 704 499       |
| 454                                   | 2.382367232                                         | 1.860486867 | 2.273095593 |             |               |
| 1.873143365                           | 1.468703809                                         | 1.010818511 |             |             |               |
| ENSG00000114354                       | 3108.241809                                         | 3252.357188 | 3052.703073 |             |               |
| 3810.292124                           | 4048.871515                                         | 3807.688746 | 3137.767357 |             |               |
| 3888.950795                           | -0.30944269                                         | 0.011596469 | 0.077583186 |             | TFG           |
| 3                                     | 100709331                                           | 100748966   | +           | 4994        |               |
| protein_coding                        | TRK-fused gene [Source:HGNC                         |             |             |             |               |
| -                                     | 3426                                                | 3675        | 2626        | 3678        | 3547 4414     |
| 33.59444759                           | 34.86865907                                         | 32.71545994 | 40.92373187 |             |               |
| 43.6576154                            | 41.09744368                                         |             |             |             |               |
| ENSG00000260022                       | 0.907250966                                         | 1.769990306 | 0           | 0           |               |
| 11.41491828                           | 44.85723035                                         | 0.892413757 |             |             |               |
| 18.75738288                           | -4.346166978                                        | 0.011604066 | 0.077604659 |             |               |
| AL031716.1                            | 16                                                  | 883780      | 885090      | +           | 530 antisense |
| "novel transcript, antisense to LMF1" |                                                     |             |             |             | 1 2           |
| 0                                     | 0                                                   | 10          | 52          | 0.092395924 | 0.178805374   |
| 0                                     | 0                                                   | 1.159768985 | 4.562033732 |             |               |
| ENSG00000257093                       | 792.9373443                                         | 581.4418156 | 568.4584168 |             |               |
| 458.9340432                           | 472.5776169                                         | 414.9293808 | 647.6125256 |             |               |
| 448.8136803                           | 0.530316                                            | 0.011614356 | 0.077644122 |             |               |
| KIAA1147                              | 7                                                   | 141656728   | 141702153   | -           | 7356          |
| protein_coding                        | KIAA1147 [Source:HGNC                               |             |             |             |               |
| -                                     | 874                                                 | 657         | 489         | 443         | 414 481       |
| 5.818330616                           | 4.232043176                                         | 4.13593767  | 3.346370702 |             |               |
| 3.459441419                           | 3.040425553                                         |             |             |             |               |
| ENSG00000136231                       | 1189.406016                                         | 846.0553664 | 978.8179692 |             |               |
| 871.2495042                           | 672.3386868                                         | 498.6053682 | 1004.759784 |             |               |
| 680.7311864                           | 0.562622097                                         | 0.011632751 | 0.077727958 |             |               |
| IGF2BP3 7                             | 23310209                                            | 23470467    | -           | 8511        |               |
| protein_coding                        | insulin like growth factor 2 mRNA binding protein 3 |             |             |             |               |
| [Source:HGNC                          | Symbol;Acc:HGNC:28868]                              | -           | 1311        | 956         | 842           |
| 841                                   | 589                                                 | 578         | 7.54311597  | 5.322353824 |               |
| 6.15514584                            | 5.490696631                                         | 4.25384895  | 3.157753797 |             |               |
| ENSG00000100416                       | 966.2222788                                         | 865.5252598 | 796.3067802 |             |               |
| 578.0704202                           | 647.2258666                                         | 695.2870705 | 876.0181062 |             |               |

|                                                                      |                                                 |                  |                  |             |
|----------------------------------------------------------------------|-------------------------------------------------|------------------|------------------|-------------|
| 640.1944524                                                          | 0.452550616                                     | 0.011636435      | 0.077727958      | TRMU        |
| 22                                                                   | 46330875                                        | 46357340         | + 9219           |             |
| protein_coding                                                       | tRNA 5-methylaminomethyl-2-thiouridylate        |                  |                  |             |
| methyltransferase                                                    | [Source:HGNC Symbol;Acc:HGNC:25481]             | -                | 1065             |             |
| 978                                                                  | 685 558                                         | 567 806          | 5.657108083      |             |
| 5.026682799                                                          | 4.622890462                                     | 3.363275376      | 3.780477034      |             |
| 4.065203071                                                          |                                                 |                  |                  |             |
| ENSG00000266865                                                      | 48.0843012                                      | 53.98470434      | 81.37441549      |             |
| 29.00711786                                                          | 15.98088559                                     | 18.978059        | 61.14780701      |             |
| 21.32202082                                                          | 1.516654869                                     | 0.011640592      | 0.077727958      |             |
| AC138207.8                                                           | 17 31008497                                     | 31093127         | + 2147           |             |
| transcribed_unprocessed_pseudogene                                   |                                                 | SMAD specific E3 |                  |             |
| ubiquitin protein ligase 2 (SMURF2) pseudogene                       | -                                               | 53               | 61               |             |
| 70                                                                   | 28 14                                           | 22               | 1.208850261      | 1.346245397 |
| 2.028489865                                                          | 0.724666242                                     | 0.400814433      | 0.476454743      |             |
| ENSG00000130720                                                      | 85.2815908                                      | 70.79961225      | 227.8483634      | 0           |
| 12.55641011                                                          | 0                                               | 127.9765221      | 4.185470037      |             |
| 4.949498544                                                          | 0.011644473                                     | 0.077727958      | FIBCD1 9         |             |
| 130902438                                                            | 130939286                                       | - 3831           | protein_coding   |             |
| fibrinogen C domain containing 1 [Source:HGNC Symbol;Acc:HGNC:25922] |                                                 |                  |                  |             |
| -                                                                    | 94 80                                           | 196 0            | 11 0             |             |
| 1.20155702                                                           | 0.989473747                                     | 3.183103543      | 0 0.176493166    |             |
| 0                                                                    |                                                 |                  |                  |             |
| ENSG00000124767                                                      | 5736.547858                                     | 5571.044489      | 5884.532732      |             |
| 6928.557294                                                          | 7411.70644                                      | 6752.738446      | 5730.70836       |             |
| 7031.000727                                                          | -0.294992706                                    | 0.011664229      | 0.077830461      | GL01        |
| 6                                                                    | 38675925                                        | 38703141         | - 2352           |             |
| protein_coding                                                       | glyoxalase I [Source:HGNC Symbol;Acc:HGNC:4323] | -                |                  |             |
| 6323                                                                 | 6295 5062                                       | 6688 6493        | 7828 131.6480856 |             |
| 126.8191558                                                          | 133.9034202                                     | 158.0050584      | 169.6896859      |             |
| 154.7549388                                                          |                                                 |                  |                  |             |
| ENSG00000145569                                                      | 29.03203091                                     | 12.38993214      | 40.68720775      | 0           |
| 4.565967313                                                          | 6.901112362                                     | 27.3697236       | 3.822359892      |             |
| 2.821846208                                                          | 0.011709776                                     | 0.078104912      | OTULINL 5        |             |
| 14581775                                                             | 14615007                                        | + 4074           | protein_coding   |             |
| OTU deubiquitinase with linear linkage specificity like              |                                                 |                  |                  |             |
| [Source:HGNC Symbol;Acc:HGNC:25629]                                  | -                                               | 32               | 14 35            |             |
| 0                                                                    | 4 8                                             | 0.384642826      | 0.162829636      |             |
| 0.534507577                                                          | 0 0.060351258                                   | 0.091306139      |                  |             |
| ENSG00000096433                                                      | 2931.327871                                     | 2187.708019      | 2287.783567      |             |
| 2276.022783                                                          | 1607.220494                                     | 1439.744567      | 2468.939819      |             |
| 1774.329281                                                          | 0.476979283                                     | 0.011736629      | 0.078254513      | ITPR3       |
| 6                                                                    | 33620365                                        | 33696574         | + 9870           |             |
| protein_coding                                                       | "inositol 1,4,5-trisphosphate receptor type 3   |                  |                  |             |
| [Source:HGNC Symbol;Acc:HGNC:6182]"                                  | -                                               | 3231             | 2472 1968        |             |
| 2197                                                                 | 1408 1669                                       | 16.03055243      | 11.8674594       |             |
| 12.40551471                                                          | 12.3687254                                      | 8.768652559      | 7.862672781      |             |
| ENSG00000132361                                                      | 4022.750783                                     | 4386.920974      | 3728.110721      |             |
| 4753.023455                                                          | 4750.888989                                     | 6166.143896      | 4045.927493      |             |
| 5223.352113                                                          | -0.368581393                                    | 0.011752606      | 0.078331518      | CLUH        |

|                                                                    |              |         |             |             |                |             |
|--------------------------------------------------------------------|--------------|---------|-------------|-------------|----------------|-------------|
| 17                                                                 | 2689386      | 2712663 | -           | 6900        | protein_coding |             |
| clustered mitochondria homolog [Source:HGNC Symbol;Acc:HGNC:29094] |              |         |             |             |                |             |
| -                                                                  | 4434         | 4957    | 3207        | 4588        | 4162           | 7148        |
| 31.4684449                                                         | 34.04052653  |         | 28.91723177 |             | 36.94761097    |             |
| 37.07663788                                                        | 48.16887144  |         |             |             |                |             |
| ENSG00000166197                                                    | 4811.151873  |         | 4799.328715 |             | 4147.770207    |             |
| 5519.640141                                                        | 5704.034665  |         | 5894.412596 |             | 4586.083598    |             |
| 5706.029134                                                        | -0.315032071 |         | 0.011773008 |             | 0.078437942    | NOLC1       |
| 10                                                                 | 102152176    |         | 102163871   |             | +              | 3970        |
| protein_coding nucleolar and coiled-body phosphoprotein 1          |              |         |             |             |                |             |
| [Source:HGNC Symbol;Acc:HGNC:15608]                                |              |         |             |             |                |             |
| 5328                                                               | 4997         | 6833    | 65.41235784 |             | 64.72551855    | 3568        |
| 55.91665526                                                        | 74.5737106   |         | 77.36886091 |             | 80.02983695    |             |
| ENSG00000106415                                                    | 159.67617    |         | 159.2991276 |             | 144.1489646    |             |
| 78.73360561                                                        | 103.8757564  |         | 63.83528935 |             | 154.3747541    |             |
| 82.14821711                                                        | 0.914718818  |         | 0.011809329 |             | 0.078650311    | GLCCI1      |
| 7                                                                  | 7968794      | 8094272 | +           | 6885        | protein_coding |             |
| glucocorticoid induced 1 [Source:HGNC Symbol;Acc:HGNC:18713]       |              |         |             |             |                |             |
| 176                                                                | 180          | 124     | 76          | 91          | 74             | 1.251807089 |
| 1.238782328                                                        | 1.120532835  |         | 0.613368814 |             | 0.81242786     |             |
| 0.499756893                                                        |              |         |             |             |                |             |
| ENSG00000175040                                                    | 1801.800418  |         | 2070.888658 |             | 2007.623079    |             |
| 2237.691949                                                        | 2493.018153  |         | 2910.544139 |             | 1960.104052    |             |
| 2547.084747                                                        | -0.37830513  |         | 0.011822916 |             | 0.078711162    | CHST2       |
| 3                                                                  | 143119331    |         | 143124014   |             | +              | 4582        |
| protein_coding carbohydrate sulfotransferase 2 [Source:HGNC        |              |         |             |             |                |             |
| Symbol;Acc:HGNC:1970]                                              |              |         |             |             |                |             |
| 3374                                                               | 21.2252514   |         | 24.19843132 |             | 23.45006762    | 2184        |
| 26.194536                                                          | 29.29846783  |         | 34.23899523 |             |                |             |
| ENSG00000197467                                                    | 313.9088342  |         | 274.3484975 |             | 351.0724783    |             |
| 175.0786756                                                        | 253.4111859  |         | 117.3189102 |             | 313.1099367    |             |
| 181.9362572                                                        | 0.786314425  |         | 0.011832946 |             | 0.078748299    |             |
| COL13A1 10                                                         | 69801867     |         | 69964275    |             | +              | 5888        |
| protein_coding collagen type XIII alpha 1 chain [Source:HGNC       |              |         |             |             |                |             |
| Symbol;Acc:HGNC:2190]                                              |              |         |             |             |                |             |
| 136                                                                | 2.877643441  |         | 2.494711525 |             | 3.191140959    | 222         |
| 1.594890778                                                        | 2.317568254  |         | 1.073994668 |             |                |             |
| ENSG00000261040                                                    | 45.3625483   |         | 104.4294281 |             | 46.499666      |             |
| 14.50355893                                                        | 30.82027936  |         | 20.70333709 |             | 65.43054745    |             |
| 22.00905846                                                        | 1.578040653  |         | 0.011844441 |             | 0.078795157    |             |
| WFDC21P 17                                                         | 60083566     |         | 60091885    |             | -              | 1099        |
| transcribed_unitary_pseudogene "WAP four-disulfide core domain 21, |              |         |             |             |                |             |
| pseudogene [Source:HGNC Symbol;Acc:HGNC:50357]"                    |              |         |             |             |                |             |
| 40                                                                 | 14           | 27      | 24          | 2.227927199 | 5.087574193    | 118         |
| 2.264483421                                                        | 0.707851875  |         | 1.510126859 |             | 1.015417321    |             |
| ENSG00000163659                                                    | 431.8514598  |         | 415.947722  |             | 475.4590848    |             |
| 614.3293175                                                        | 623.2545382  |         | 602.1220536 |             | 441.0860889    |             |
| 613.2353031                                                        | -0.476109456 |         | 0.01185013  |             | 0.078803363    | TIPARP      |
| 3                                                                  | 156673235    |         | 156706770   |             | +              | 5048        |
| protein_coding TCDD inducible poly(ADP-ribose) polymerase          |              |         |             |             |                |             |

|                                                             |                                        |                                      |             |             |
|-------------------------------------------------------------|----------------------------------------|--------------------------------------|-------------|-------------|
| [Source:HGNC Symbol;Acc:HGNC:23696]                         | -                                      | 476                                  | 470         | 409         |
| 593                                                         | 546                                    | 698                                  | 4.617599794 | 4.411689641 |
| 5.040931644                                                 | 6.52750767                             | 6.648453823                          | 6.429350386 |             |
| ENSG00000258770                                             | 2.721752898                            | 0                                    | 2.3249833   | 8.287747959 |
| 17.12237742                                                 | 28.46708849                            | 1.682245399                          | 17.95907129 |             |
| -3.4401655                                                  | 0.011857                               | 0.078819418                          | LINC02330   |             |
| 14                                                          | 87634379                               | 87655294                             | -           | 555         |
| lincRNA long intergenic non-protein coding RNA              | 2330                                   | [Source:HGNC                         |             |             |
| Symbol;Acc:HGNC:53250]                                      | -                                      | 3                                    | 0           | 2           |
| 33                                                          | 0.264701837                            | 0                                    | 0.224204259 | 0.800956716 |
| 1.661290709                                                 | 2.764725224                            |                                      |             |             |
| ENSG00000140374                                             | 1799.985917                            | 1785.920219                          | 2062.260187 |             |
| 1414.096996                                                 | 1439.421195                            | 1538.085418                          | 1882.722107 |             |
| 1463.86787                                                  | 0.362366521                            | 0.011867749                          | 0.07884064  | ETFA        |
| 15                                                          | 76215355                               | 76311472                             | -           | 5031        |
| protein_coding electron transfer flavoprotein subunit alpha |                                        |                                      |             |             |
| [Source:HGNC Symbol;Acc:HGNC:3481]                          | -                                      | 1984                                 | 2018        | 1774        |
| 1365                                                        | 1261                                   | 1783                                 | 19.31150114 | 19.00611205 |
| 21.93846032                                                 | 15.0761475                             | 15.40664691                          | 16.47889339 |             |
| ENSG00000237685                                             | 3.629003864                            | 0                                    | 0           | 11.39565344 |
| 19.40536108                                                 | 20.70333709                            | 1.209667955                          |             |             |
| 17.1681172                                                  | -3.785394058                           | 0.011869106                          | 0.07884064  |             |
| AL139039.3                                                  | 6                                      | 10511036                             | 10514546    | -           |
| antisense                                                   | "novel transcript, antisense to GCNT2" | -                                    |             | 1475        |
| 4                                                           | 0                                      | 0                                    | 11          | 17          |
| 0                                                           | 0                                      | 0.414393284                          | 0.708441936 | 0.132799566 |
| ENSG00000169738                                             | 968.9440317                            | 1208.903379                          | 1392.664997 |             |
| 936.5155194                                                 | 888.0806423                            | 759.9849989                          | 1190.170802 |             |
| 861.5270535                                                 | 0.466026923                            | 0.011876215                          | 0.078848133 | DCXR        |
| 17                                                          | 82035136                               | 82037732                             | -           | 1902        |
| protein_coding dicarbonyl and L-xylulose reductase          | [Source:HGNC                           |                                      |             |             |
| Symbol;Acc:HGNC:18985]                                      | -                                      | 1068                                 | 1366        | 1198        |
| 881                                                         | 27.49726022                            | 34.03036659                          | 39.18800475 | 904         |
| 26.41009488                                                 | 25.14296232                            | 21.53755572                          |             | 778         |
| ENSG00000127838                                             | 457.2544869                            | 481.4373633                          | 671.9201736 |             |
| 387.4522171                                                 | 384.6827461                            | 294.1599144                          | 536.8706746 |             |
| 355.4316259                                                 | 0.59479533                             | 0.011879149                          | 0.078848133 | PNKD        |
| 2                                                           | 218270392                              | 218346793                            | +           | 5184        |
| protein_coding "PNKD, MBL domain containing                 | [Source:HGNC                           |                                      |             |             |
| Symbol;Acc:HGNC:9153]"                                      | -                                      | 504                                  | 544         | 578         |
| 341                                                         | 4.76095665                             | 4.972334623                          | 6.936968017 | 374         |
| 4.008839353                                                 | 3.995878443                            | 3.058583943                          |             | 337         |
| ENSG00000170860                                             | 1393.537484                            | 1640.781014                          | 1656.550601 |             |
| 1368.514382                                                 | 1083.275745                            | 1053.282274                          | 1563.623033 |             |
| 1168.357467                                                 | 0.420389104                            | 0.011889674                          | 0.078888387 | LSM3        |
| 3                                                           | 14178358                               | 14201119                             | +           | 3815        |
| protein_coding "LSM3 homolog, U6 small nuclear RNA and mRNA | degradation associated                 | [Source:HGNC Symbol;Acc:HGNC:17874]" |             | -           |
| 1536                                                        | 1854                                   | 1425                                 | 1321        | 949         |
| 23.02722626                                                 | 23.2395208                             | 19.24067567                          | 1221        | 19.71629724 |
|                                                             |                                        |                                      |             | 15.29040646 |



|                                    |                                                                                               |             |                |                |       |     |
|------------------------------------|-----------------------------------------------------------------------------------------------|-------------|----------------|----------------|-------|-----|
| 14.8816861                         |                                                                                               |             |                |                |       |     |
| ENSG0000042286                     | 486.2865178                                                                                   | 506.2172276 | 540.5586172    |                |       |     |
| 354.3012253                        | 320.7592037                                                                                   | 391.6381266 | 511.0207875    |                |       |     |
| 355.5661852                        | 0.521604089                                                                                   | 0.011905257 | 0.078962166    |                | AIFM2 |     |
| 10                                 | 70098223                                                                                      | 70132934    | -              | 5135           |       |     |
| protein_coding                     | "apoptosis inducing factor, mitochondria associated 2 [Source:HGNC Symbol;Acc:HGNC:21411]"    |             |                |                |       |     |
|                                    | -                                                                                             |             | 536            | 572            | 465   |     |
| 342                                | 281                                                                                           | 454         | 5.111554849    | 5.278153566    |       |     |
| 5.634032548                        | 3.700817779                                                                                   | 3.363668841 | 4.110990025    |                |       |     |
| ENSG00000186197                    | 19.05227029                                                                                   | 22.12487883 | 6.974949899    |                |       |     |
| 2.07193699                         | 0                                                                                             | 1.725278091 | 16.05069967    | 1.26573836     |       |     |
| 3.63603191                         | 0.011914383                                                                                   | 0.078993072 | EDARADD        | 1              |       |     |
| 236348257                          | 236502915                                                                                     | +           | 3985           | protein_coding |       |     |
|                                    | EDAR associated death domain [Source:HGNC Symbol;Acc:HGNC:14341]                              |             |                |                |       |     |
|                                    | -                                                                                             | 21          | 25             | 6              | 2     | 0   |
| 2                                  | 0.258059382                                                                                   | 0.29726113  | 0.093676309    |                |       |     |
| 0.027887765                        | 0                                                                                             | 0.023336337 |                |                |       |     |
| ENSG00000171084                    | 107.055614                                                                                    | 115.0493699 | 104.6242485    |                |       |     |
| 162.6470537                        | 154.1013968                                                                                   | 284.6708849 | 108.9097441    |                |       |     |
| 200.4731118                        | -0.882418636                                                                                  | 0.011935282 | 0.079088276    |                |       |     |
| FAM86JP                            | 3                                                                                             | 125916620   | 125930024      | +              | 2519  |     |
| transcribed_unprocessed_pseudogene | "family with sequence similarity 86 member J, pseudogene [Source:HGNC Symbol;Acc:HGNC:44097]" |             |                |                |       |     |
|                                    | -                                                                                             | 118         | 130            | 90             | 157   | 135 |
| 330                                | 2.293942477                                                                                   | 2.445353365 | 2.222906463    |                |       |     |
| 3.463247493                        | 3.294222743                                                                                   | 6.091395393 |                |                |       |     |
| ENSG00000130640                    | 2812.477995                                                                                   | 3121.377905 | 3792.047762    |                |       |     |
| 4311.700876                        | 4604.778035                                                                                   | 3749.029291 | 3241.967887    |                |       |     |
| 4221.836067                        | -0.381194927                                                                                  | 0.011937684 | 0.079088276    |                |       |     |
| TUBGCP2                            | 10                                                                                            | 133278630   | 133312337      | -              | 7697  |     |
| protein_coding                     | tubulin gamma complex associated protein 2 [Source:HGNC Symbol;Acc:HGNC:18599]                |             |                |                |       |     |
|                                    | -                                                                                             |             | 3100           | 3527           | 3262  |     |
| 4162                               | 4034                                                                                          | 4346        | 19.72281454    | 21.71252912    |       |     |
| 26.36752198                        | 30.04641303                                                                                   | 32.2152694  | 26.25422807    |                |       |     |
| ENSG00000254419                    | 3.629003864                                                                                   | 14.15992245 | 8.137441549    |                | 0     |     |
| 0                                  | 0                                                                                             | 8.642122621 | 0              | 5.545104029    |       |     |
| 0.011953479                        | 0.079144713                                                                                   | AL139349.1  | 20             | 58710795       |       |     |
| 58711633                           | +                                                                                             | 577         | sense_intronic | novel          |       |     |
| transcript                         | -                                                                                             | 4           | 16             | 7              | 0     | 0   |
| 0.339478959                        | 1.313925104                                                                                   | 0.754795102 | 0              | 0              | 0     |     |
| 0                                  |                                                                                               |             |                |                |       |     |
| ENSG00000103507                    | 909.0654679                                                                                   | 1072.614126 | 1078.792251    |                |       |     |
| 1087.76692                         | 1571.834247                                                                                   | 1557.063477 | 1020.157282    |                |       |     |
| 1405.554881                        | -0.462695956                                                                                  | 0.011955151 | 0.079144713    |                | BCKDK |     |
| 16                                 | 31106107                                                                                      | 31112791    | +              | 3873           |       |     |
| protein_coding                     | branched chain ketoacid dehydrogenase kinase [Source:HGNC Symbol;Acc:HGNC:16902]              |             |                |                |       |     |
|                                    | -                                                                                             |             | 1002           | 1212           | 928   |     |
| 1050                               | 1377                                                                                          | 1805        | 12.66919171    | 14.82796539    |       |     |
| 14.90758608                        | 15.06446961                                                                                   | 21.85414416 | 21.67009062    |                |       |     |
| ENSG00000177105                    | 1030.637097                                                                                   | 1265.543069 | 1076.467268    |                |       |     |

|                                     |                                                      |             |                |                    |
|-------------------------------------|------------------------------------------------------|-------------|----------------|--------------------|
| 1397.5215                           | 1464.534016                                          | 1572.59098  | 1124.215811    |                    |
| 1478.215498                         | -0.394834561                                         | 0.011964224 | 0.07914726     | RHOG               |
| 11                                  | 3826978                                              | 3840983     | -              | 1782               |
| homolog                             | family member G [Source:HGNC Symbol;Acc:HGNC:672]    |             |                | protein_coding ras |
| 1136                                | 1430                                                 | 926         | 1349           | 1283               |
| 38.02373535                         | 32.33032971                                          | 42.06455449 | 44.25540473    |                    |
| 47.56746279                         |                                                      |             |                |                    |
| ENSG00000175029                     | 1206.643785                                          | 984.9996054 | 1267.115898    |                    |
| 906.472433                          | 842.4209692                                          | 825.5455663 | 1152.919763    |                    |
| 858.1463229                         | 0.425544237                                          | 0.011964485 | 0.07914726     | CTBP2              |
| 10                                  | 124984317                                            | 125161170   | -              | 10946              |
| protein_coding                      | C-terminal binding protein 2 [Source:HGNC            |             |                |                    |
| Symbol;Acc:HGNC:2495]               | -                                                    | 1330        | 1113           | 1090               |
| 957                                 | 5.950108439                                          | 4.817992963 | 6.195521961    | 875                |
| 4.441857818                         | 4.144272254                                          | 4.065252374 |                | 738                |
| ENSG00000135549                     | 31.75378381                                          | 49.55972857 | 47.66215765    |                    |
| 89.09329056                         | 115.2906746                                          | 83.67598739 | 42.99189001    |                    |
| 96.0199842                          | -1.159464139                                         | 0.01198135  | 0.0792292      | PKIB               |
| 6                                   | 122471917                                            | 122726373   | +              | 3432               |
| protein_coding                      | cAMP-dependent protein kinase inhibitor beta         |             |                |                    |
| [Source:HGNC Symbol;Acc:HGNC:9018]  | -                                                    | 35          | 56             | 41                 |
| 86                                  | 101                                                  | 97          | 0.499401047    | 0.773156103        |
| 0.743264558                         | 1.392397439                                          | 1.808928723 | 1.314181875    |                    |
| ENSG00000103264                     | 1686.579546                                          | 1883.269686 | 1898.348864    |                    |
| 2153.778501                         | 2300.106034                                          | 2541.334627 | 1822.732699    |                    |
| 2331.739721                         | -0.35572663                                          | 0.011998825 | 0.079315105    | FBX031             |
| 16                                  | 87326987                                             | 87392142    | -              | 6897               |
| protein_coding                      | F-box protein 31 [Source:HGNC Symbol;Acc:HGNC:16510] |             |                |                    |
| -                                   | 1859                                                 | 2128        | 1633           | 2079               |
| 13.19920723                         | 14.61967905                                          | 14.73101953 | 16.749672      |                    |
| 17.95817439                         | 19.86111082                                          |             |                |                    |
| ENSG00000143575                     | 1661.176519                                          | 1899.199599 | 1794.887107    |                    |
| 1959.016424                         | 2483.886218                                          | 2556.86213  | 1785.087742    |                    |
| 2333.254924                         | -0.386468236                                         | 0.012019447 | 0.079421742    | HAX1               |
| 1                                   | 154272511                                            | 154275875   | +              | 2155               |
| protein_coding                      | HCLS1 associated protein X-1 [Source:HGNC            |             |                |                    |
| Symbol;Acc:HGNC:16915]              | -                                                    | 1831        | 2146           | 1544               |
| 2964                                | 41.60732099                                          | 47.18553505 | 44.57659258    | 1891               |
| 48.7591693                          | 62.06674596                                          | 63.95315037 |                | 2176               |
| ENSG00000084710                     | 0.907250966                                          | 15.0449176  | 11.6249165     | 0                  |
| 0                                   | 0                                                    | 9.192361689 | 0              | 5.632485304        |
| 0.012076853                         | 0.079745142                                          | EFR3B       | 2              | 25042130           |
| 25159137                            | +                                                    | 10591       | protein_coding | EFR3 homolog B     |
| [Source:HGNC Symbol;Acc:HGNC:29155] | -                                                    | 1           | 17             | 10                 |
| 0                                   | 0                                                    | 0           | 0.004623722    | 0.07605686         |
| 0.058744861                         | 0                                                    | 0           | 0              |                    |
| ENSG00000159423                     | 117.0353746                                          | 59.29467526 | 149.9614228    |                    |
| 15.53952742                         | 38.81072216                                          | 66.42320649 | 108.7638242    |                    |
| 40.25781869                         | 1.425939758                                          | 0.012077406 | 0.079745142    |                    |
| ALDH4A1                             | 1                                                    | 18871430    | 18902781       | -                  |
|                                     |                                                      |             |                | 3689               |

|                                                      |                                                        |             |                |                  |                |       |
|------------------------------------------------------|--------------------------------------------------------|-------------|----------------|------------------|----------------|-------|
| protein_coding                                       | aldehyde dehydrogenase 4 family member A1 [Source:HGNC |             |                |                  |                |       |
| Symbol;Acc:HGNC:406]                                 | -                                                      | 129         | 67             | 129              | 15             | 34    |
| 77                                                   | 1.71241782                                             | 0.860582654 | 2.175644342    |                  |                |       |
| 0.225940792                                          | 0.566523099                                            | 0.970539215 |                |                  |                |       |
| ENSG00000280537                                      | 14.51601546                                            | 11.50493699 | 1.16249165     | 0                |                |       |
| 0                                                    | 0                                                      | 9.061148032 | 0              | 5.617289821      |                |       |
| 0.012091                                             | 0.079805114                                            | AC068946.1  | 2              | 219075329        |                |       |
| 219170827                                            | -                                                      | 4650        | protein_coding | "novel           |                |       |
| protein, SLC23A3-NHEJ1 readthrough"                  | -                                                      | 16          | 13             | 1                |                |       |
| 0                                                    | 0                                                      | 0           | 0.168498374    | 0.132469788      |                |       |
| 0.013379932                                          | 0                                                      | 0           | 0              |                  |                |       |
| ENSG00000256973                                      | 3.629003864                                            | 6.194966072 | 16.2748831     | 0                |                |       |
| 0                                                    | 0                                                      | 8.699617678 | 0              | 5.549138446      |                |       |
| 0.012106292                                          | 0.079876243                                            | AC053513.1  | 12             | 22460519         |                |       |
| 22463914                                             | -                                                      | 738         | lincRNA        | novel transcript |                |       |
| -                                                    | 4                                                      | 7           | 14             | 0                | 0              |       |
| 0.265419186                                          | 0.449436272                                            | 1.18026226  | 0              | 0                | 0              |       |
| ENSG00000197885                                      | 655.9424484                                            | 603.5666944 | 478.9465598    |                  |                |       |
| 661.9838682                                          | 854.9773793                                            | 997.2107363 | 579.4852342    |                  |                |       |
| 838.057328                                           | -0.531686768                                           | 0.012129173 | 0.07999737     |                  |                |       |
| NKIRAS1 3                                            | 23891660                                               | 23946591    | -              | 3473             |                |       |
| protein_coding                                       | NFKB inhibitor interacting Ras like 1 [Source:HGNC     |             |                |                  |                |       |
| Symbol;Acc:HGNC:17899]                               | -                                                      | 723         | 682            | 412              | 639            | 749   |
| 1156                                                 | 10.19441238                                            | 9.304778349 | 7.380729337    |                  |                |       |
| 10.2237005                                           | 13.2563632                                             | 15.47690329 |                |                  |                |       |
| ENSG00000164463                                      | 268.5462859                                            | 248.683638  | 254.5856713    |                  |                |       |
| 401.955776                                           | 433.7668947                                            | 327.8028372 | 257.2718651    |                  |                |       |
| 387.841836                                           | -0.590845457                                           | 0.012137257 | 0.080020847    | CREBRF           |                |       |
| 5                                                    | 173056352                                              | 173139284   | +              | 12333            |                |       |
| protein_coding                                       | CREB3 regulatory factor [Source:HGNC                   |             |                |                  |                |       |
| Symbol;Acc:HGNC:24050]                               | -                                                      | 296         | 281            | 219              | 388            | 380   |
| 380                                                  | 1.175307921                                            | 1.079602867 | 1.104796348    |                  |                |       |
| 1.748135281                                          | 1.893922595                                            | 1.432669064 |                |                  |                |       |
| ENSG00000184281                                      | 636.8901781                                            | 902.6950562 | 730.0447561    |                  |                |       |
| 851.5661028                                          | 966.8435785                                            | 1601.058068 | 756.5433301    |                  |                |       |
| 1139.822583                                          | -0.592016912                                           | 0.012147969 | 0.080061631    | TSSC4            |                |       |
| 11                                                   | 2400488                                                | 2403878     | +              | 2659             | protein_coding | tumor |
| suppressing subtransferable candidate 4 [Source:HGNC |                                                        |             |                |                  |                |       |
| Symbol;Acc:HGNC:12386]                               | -                                                      | 702         | 1020           | 628              | 822            | 847   |
| 1856                                                 | 12.92847971                                            | 18.1764169  | 14.69427465    |                  |                |       |
| 17.17772018                                          | 19.57998854                                            | 32.45567551 |                |                  |                |       |
| ENSG00000154473                                      | 3589.992072                                            | 3612.550215 | 3878.072144    |                  |                |       |
| 2853.057235                                          | 3035.226771                                            | 3037.352078 | 3693.538144    |                  |                |       |
| 2975.212028                                          | 0.311834126                                            | 0.01215791  | 0.080097304    | BUB3             |                |       |
| 10                                                   | 123154277                                              | 123170467   | +              | 8300             |                |       |
| protein_coding                                       | "BUB3, mitotic checkpoint protein [Source:HGNC         |             |                |                  |                |       |
| Symbol;Acc:HGNC:1151]"                               | -                                                      | 3957        | 4082           | 3336             | 2754           | 2659  |
| 3521                                                 | 23.34622364                                            | 23.30351048 | 25.00660857    |                  |                |       |
| 18.43732398                                          | 19.69189925                                            | 19.72508806 |                |                  |                |       |
| ENSG00000165490                                      | 1154.93048                                             | 920.3949592 | 771.8944555    |                  |                |       |

|                                                       |                                                        |             |             |                |
|-------------------------------------------------------|--------------------------------------------------------|-------------|-------------|----------------|
| 856.7459453                                           | 496.5489453                                            | 539.1494033 | 949.0732982 |                |
| 630.8147646                                           | 0.589958221                                            | 0.012170443 | 0.080150026 | DDIAS          |
| 11                                                    | 82899975                                               | 82958277    | + 5339      |                |
| protein_coding                                        | DNA damage induced apoptosis suppressor [Source:HGNC   |             |             |                |
| Symbol;Acc:HGNC:26351]                                | -                                                      | 1273 1040   | 664 827     | 435            |
| 625                                                   | 11.67608281                                            | 9.229960857 | 7.737755544 |                |
| 8.607115529                                           | 5.008142715                                            | 5.443160177 |             |                |
| ENSG00000127418                                       | 3116.407068                                            | 2307.182364 | 3079.440381 |                |
| 2066.757147                                           | 2303.530509                                            | 2124.679969 | 2834.343271 |                |
| 2164.989208                                           | 0.388524442                                            | 0.012202151 | 0.080328935 | FGFRL1         |
| 4                                                     | 1009936                                                | 1026897 +   | 4145        | protein_coding |
| fibroblast growth factor receptor like 1 [Source:HGNC |                                                        |             |             |                |
| Symbol;Acc:HGNC:3693]                                 | -                                                      | 3435 2607   | 2649 1995   | 2018           |
| 2463                                                  | 40.58176112                                            | 29.80183028 | 39.76163827 |                |
| 26.74424911                                           | 29.92567721                                            | 27.62936445 |             |                |
| ENSG00000096092                                       | 630.5394214                                            | 524.8021258 | 564.9709418 |                |
| 468.2577597                                           | 388.1072216                                            | 320.9017248 | 573.4374963 |                |
| 392.4222354                                           | 0.548353857                                            | 0.012209046 | 0.080344424 |                |
| TMEM14A 6                                             | 52671109                                               | 52686588    | + 992       |                |
| protein_coding                                        | transmembrane protein 14A [Source:HGNC                 |             |             |                |
| Symbol;Acc:HGNC:21076]                                | -                                                      | 695 593     | 486 452     | 340            |
| 372                                                   | 34.30850674                                            | 28.32497023 | 30.48115671 |                |
| 25.31854862                                           | 21.06757774                                            | 17.43661931 |             |                |
| ENSG00000115541                                       | 591.5276298                                            | 966.4147072 | 733.5322311 |                |
| 474.4735707                                           | 466.8701577                                            | 609.023166  | 763.824856  |                |
| 516.7889648                                           | 0.56290142                                             | 0.012216204 | 0.080361637 | HSPE1          |
| 2                                                     | 197499994                                              | 197503457   | + 1977      |                |
| protein_coding                                        | heat shock protein family E (Hsp10) member 1           |             |             |                |
| [Source:HGNC Symbol;Acc:HGNC:5269]                    | -                                                      |             | 652 1092    | 631            |
| 458                                                   | 409 706                                                | 16.14989154 | 26.17233134 |                |
| 19.85772703                                           | 12.87273569                                            | 12.71639469 | 16.60462416 |                |
| ENSG0000010704                                        | 187.80095                                              | 244.2586623 | 134.8490314 |                |
| 130.5320304                                           | 77.62144432                                            | 91.4397388  | 188.9695479 |                |
| 99.86440449                                           | 0.921825773                                            | 0.012237629 | 0.080472649 | HFE            |
| 6                                                     | 26087281                                               | 26098343    | + 5675      |                |
| protein_coding                                        | homeostatic iron regulator [Source:HGNC                |             |             |                |
| Symbol;Acc:HGNC:4886]                                 | -                                                      | 207 276     | 116 126     | 68             |
| 106                                                   | 1.78621266                                             | 2.304462562 | 1.27174187  |                |
| 1.233720334                                           | 0.736529942                                            | 0.868502389 |             |                |
| ENSG00000119943                                       | 84.37433984                                            | 74.33959286 | 81.37441549 |                |
| 13.46759043                                           | 23.97132839                                            | 50.03306463 | 80.0294494  |                |
| 29.15732782                                           | 1.447132012                                            | 0.012258    | 0.080576648 |                |
| PYROXD2 10                                            | 98383565                                               | 98415184    | - 3867      |                |
| protein_coding                                        | pyridine nucleotide-disulphide oxidoreductase domain 2 |             |             |                |
| [Source:HGNC Symbol;Acc:HGNC:23517]                   | -                                                      |             | 93 84       | 70             |
| 13                                                    | 21 58                                                  | 1.177707552 | 1.029275309 |                |
| 1.126239395                                           | 0.186801872                                            | 0.333804727 | 0.697404651 |                |
| ENSG00000085063                                       | 3022.960219                                            | 3478.915947 | 4151.257682 |                |
| 3822.723746                                           | 5172.099473                                            | 5169.795798 | 3551.044616 |                |
| 4721.539673                                           | -0.411350354                                           | 0.012295416 | 0.080792577 | CD59           |

|                                                             |                                                       |             |             |                |  |
|-------------------------------------------------------------|-------------------------------------------------------|-------------|-------------|----------------|--|
| 11                                                          | 33703010                                              | 33736491    | -           | 10358          |  |
| protein_coding                                              | CD59 molecule (CD59 blood group) [Source:HGNC         |             |             |                |  |
| Symbol;Acc:HGNC:1689]                                       | -                                                     | 3332 3931   | 3571 3690   | 4531           |  |
| 5993                                                        | 15.75280038                                           | 17.98264529 | 21.44967865 |                |  |
| 19.79531893                                                 | 26.88843439                                           | 26.90291808 |             |                |  |
| ENSG00000137936                                             | 1660.269268                                           | 1823.975011 | 1493.80177  |                |  |
| 2199.361115                                                 | 2098.06198                                            | 2084.998572 | 1659.348683 |                |  |
| 2127.473889                                                 | -0.357953293                                          | 0.012308709 | 0.080849889 | BCAR3          |  |
| 1                                                           | 93561786                                              | 93847150    | - 6866      |                |  |
| protein_coding                                              | "BCAR3, NSP family adaptor protein [Source:HGNC       |             |             |                |  |
| Symbol;Acc:HGNC:973]"                                       | -                                                     | 1830 2061   | 1285 2123   | 1838           |  |
| 2417                                                        | 13.05196721                                           | 14.22330862 | 11.64410667 |                |  |
| 17.18138773                                                 | 16.45466588                                           | 16.36831105 |             |                |  |
| ENSG00000167264                                             | 325.7030968                                           | 338.0681485 | 333.6351035 |                |  |
| 349.1213828                                                 | 545.6330939                                           | 651.2924792 | 332.4687829 |                |  |
| 515.3489853                                                 | -0.633160262                                          | 0.012330325 | 0.080961811 | DUS2           |  |
| 16                                                          | 67987746                                              | 68079320    | + 4472      |                |  |
| protein_coding                                              | dihydrouridine synthase 2 [Source:HGNC                |             |             |                |  |
| Symbol;Acc:HGNC:26014]                                      | -                                                     | 359 382     | 287 337     | 478            |  |
| 755                                                         | 3.931165586                                           | 4.047510731 | 3.992886345 |                |  |
| 4.187358549                                                 | 6.570122422                                           | 7.850117818 |             |                |  |
| ENSG00000131015                                             | 217.7402318                                           | 231.8687301 | 238.3107882 |                |  |
| 383.3083431                                                 | 281.9484816                                           | 396.8139608 | 229.3065834 |                |  |
| 354.0235952                                                 | -0.628292378                                          | 0.012375732 | 0.081229802 | ULBP2          |  |
| 6                                                           | 149942000                                             | 149949235   | + 1349      |                |  |
| protein_coding                                              | UL16 binding protein 2 [Source:HGNC                   |             |             |                |  |
| Symbol;Acc:HGNC:14894]                                      | -                                                     | 240 262     | 205 370     | 247            |  |
| 460                                                         | 8.712202787                                           | 9.202710973 | 9.454721876 |                |  |
| 15.24059134                                                 | 11.25465959                                           | 15.85538895 |             |                |  |
| ENSG00000196588                                             | 569.7536066                                           | 717.7310692 | 678.8951235 |                |  |
| 827.7388274                                                 | 913.1934625                                           | 938.5512813 | 655.4599331 |                |  |
| 893.1611904                                                 | -0.446785869                                          | 0.012408251 | 0.081410918 | MRTFA          |  |
| 22                                                          | 40410281                                              | 40636702    | - 6533      |                |  |
| protein_coding                                              | myocardin related transcription factor A [Source:HGNC |             |             |                |  |
| Symbol;Acc:HGNC:14334]                                      | -                                                     | 628 811     | 584 799     | 800            |  |
| 1088                                                        | 4.707341101                                           | 5.882130248 | 5.561693294 |                |  |
| 6.795887248                                                 | 7.52704806                                            | 7.743677458 |             |                |  |
| ENSG00000133028                                             | 2056.73794                                            | 2266.472587 | 1653.063126 |                |  |
| 2393.087223                                                 | 2635.704631                                           | 2817.379122 | 1992.091218 |                |  |
| 2615.390325                                                 | -0.392244646                                          | 0.01241253  | 0.081410918 | SC01           |  |
| 17                                                          | 10672474                                              | 10698375    | - 10325     |                |  |
| protein_coding                                              | "SC01, cytochrome c oxidase assembly protein          |             |             |                |  |
| [Source:HGNC Symbol;Acc:HGNC:10603]"                        | -                                                     |             | 2267 2561   | 1422           |  |
| 2310                                                        | 2309 3266                                             | 10.75202198 | 11.75292484 |                |  |
| 8.568728505                                                 | 12.43179853                                           | 13.74615488 | 14.70811911 |                |  |
| ENSG00000021355                                             | 271.2680388                                           | 346.0331049 | 282.4854709 |                |  |
| 197.8699825                                                 | 173.5067579                                           | 200.9948975 | 299.9288715 |                |  |
| 190.790546                                                  | 0.652292104                                           | 0.012444558 | 0.081590726 |                |  |
| SERPINB1                                                    | 6 2832332                                             | 2842006 -   | 3094        | protein_coding |  |
| serpin family B member 1 [Source:HGNC Symbol;Acc:HGNC:3311] |                                                       |             |             |                |  |

|                         |                                 |                              |             |              |             |                |        |
|-------------------------|---------------------------------|------------------------------|-------------|--------------|-------------|----------------|--------|
| -                       | 299                             | 391                          | 243         | 191          | 152         | 233            |        |
| 4.73237948              | 5.988015128                     |                              | 4.886442704 |              | 3.430244696 |                |        |
| 3.019747558             | 3.501600776                     |                              |             |              |             |                |        |
| ENSG00000169777         | 0                               | 0                            | 0           | 0            | 5.707459141 |                |        |
| 25.87917136             | 0                               | 10.52887683                  |             | -5.876609309 | 0.012471966 |                |        |
|                         | 0.081740131                     | TAS2R1                       | 5           | 9628997      | 9712378     | -              | 1727   |
|                         | protein_coding                  | taste 2 receptor member 1    |             |              |             |                |        |
| Symbol;Acc:HGNC:14909]  | -                               |                              | 0           | 0            | 0           | 0              | 5      |
|                         | 30                              | 0                            | 0           | 0            | 0.177961078 |                |        |
| 0.807718324             |                                 |                              |             |              |             |                |        |
| ENSG00000157954         | 2376.09028                      |                              | 2623.125634 |              | 2819.042251 |                |        |
| 2805.402684             | 3385.664762                     |                              | 4171.722423 |              | 2606.086055 |                |        |
| 3454.26329              | -0.406970405                    |                              | 0.012520274 |              | 0.082026341 |                | WIPI2  |
|                         | 7                               | 5190188                      | 5233826     | +            | 8977        | protein_coding | "WD    |
|                         | repeat domain, phosphoinositide | interacting 2                |             |              |             |                |        |
| Symbol;Acc:HGNC:32225]" | -                               |                              | 2619        | 2964         | 2425        | 2708           | 2966   |
|                         | 4836                            | 14.28673393                  |             | 15.64492246  |             | 16.80689026    |        |
| 16.76214057             | 20.30894118                     |                              | 25.04875155 |              |             |                |        |
| ENSG00000119446         | 795.6590972                     |                              | 908.8900223 |              | 657.9702738 |                |        |
| 977.9542592             | 1141.491828                     |                              | 1112.804368 |              | 787.5064644 |                |        |
| 1077.416819             | -0.451038498                    |                              | 0.012550081 |              | 0.082169978 |                | RBM18  |
|                         | 9                               | 122237624                    |             | 122264839    |             | -              | 5193   |
|                         | protein_coding                  | RNA binding motif protein 18 |             |              |             |                |        |
| Symbol;Acc:HGNC:28413]  | -                               |                              | 877         | 1027         | 566         | 944            | 1000   |
|                         | 1290                            | 8.270084639                  |             | 9.370840844  |             | 6.781175046    |        |
| 10.10103126             | 11.83665631                     |                              | 11.55054312 |              |             |                |        |
| ENSG00000176170         | 3551.887532                     |                              | 4440.020683 |              | 3795.535237 |                |        |
| 4296.161348             | 5033.978962                     |                              | 6169.594452 |              | 3929.147817 |                |        |
| 5166.578254             | -0.395102403                    |                              | 0.012555904 |              | 0.082169978 |                | SPHK1  |
|                         | 17                              | 76376584                     |             | 76387860     |             | +              | 4416   |
|                         | protein_coding                  | sphingosine kinase 1         |             |              |             |                |        |
| Symbol;Acc:HGNC:11240]  | -                               |                              | 3915        | 5017         | 3265        | 4147           | 4410   |
|                         | 7152                            | 43.41415827                  |             | 53.83211922  |             | 46.00033214    |        |
| 52.18155469             | 61.38424025                     |                              | 75.30597906 |              |             |                |        |
| ENSG00000205220         | 143.3456526                     |                              | 188.5039676 |              | 258.0731463 |                |        |
| 61.1221412              | 159.8088559                     |                              | 59.52209412 |              | 196.6409222 |                |        |
| 93.48436376             | 1.076459578                     |                              | 0.012556134 |              | 0.082169978 |                | PSMB10 |
|                         | 16                              | 67934502                     |             | 67937087     |             | -              | 1853   |
|                         | protein_coding                  | proteasome subunit beta 10   |             |              |             |                |        |
| Symbol;Acc:HGNC:9538]   | -                               |                              | 158         | 213          | 222         | 59             | 140    |
|                         | 69                              | 4.175517913                  |             | 5.446664503  |             | 7.453914412    |        |
| 1.769247685             | 4.644083039                     |                              | 1.731429009 |              |             |                |        |
| ENSG00000211592         | 39.9190425                      |                              | 40.70977704 |              | 31.38727455 |                |        |
| 4.14387398              | 0                               | 15.52750281                  |             | 37.33869803  |             | 6.557125598    |        |
|                         | 2.478673448                     | 0.012570433                  |             | 0.082233133  |             | IGKC           | 2      |
|                         | 88857161                        | 88857683                     |             | -            | 523         | IG_C_gene      |        |
|                         | immunoglobulin kappa constant   |                              |             |              |             |                |        |
| Symbol;Acc:HGNC:5716]   | -                               |                              | 44          | 46           | 27          | 4              | 0      |
|                         | 18                              | 4.119833561                  |             | 4.167566934  |             | 3.211951079    |        |
| 0.424981814             | 0                               | 1.600301581                  |             |              |             |                |        |

|                                      |                                                       |             |             |                |
|--------------------------------------|-------------------------------------------------------|-------------|-------------|----------------|
| ENSG00000111846                      | 1020.657337                                           | 690.2962194 | 938.1307615 |                |
| 746.9332848                          | 579.8778487                                           | 483.9405044 | 883.0281059 |                |
| 603.5838793                          | 0.549267905                                           | 0.012593017 | 0.082350415 | GCNT2          |
| 6                                    | 10492223                                              | 10629368    | + 9072      |                |
| protein_coding                       | glucosaminyl (N-acetyl) transferase 2 (I blood group) |             |             |                |
| [Source:HGNC Symbol;Acc:HGNC:4204]   | -                                                     | 1125        | 780         | 807            |
| 721                                  | 508                                                   | 561         | 6.072648789 | 4.073971645    |
| 5.534486594                          | 4.416154581                                           | 3.441977531 | 2.875350804 |                |
| ENSG00000136807                      | 966.2222788                                           | 1176.158558 | 953.2431529 |                |
| 1237.982351                          | 1358.375276                                           | 1543.261252 | 1031.874663 |                |
| 1379.87296                           | -0.419138652                                          | 0.012603271 | 0.082387013 | CDK9           |
| 9                                    | 127785679                                             | 127790787   | + 3000      |                |
| protein_coding                       | cyclin dependent kinase 9 [Source:HGNC                |             |             |                |
| Symbol;Acc:HGNC:1780]                | -                                                     | 1065        | 1329        | 820 1195 1190  |
| 1789                                 | 17.38429314                                           | 20.99085686 | 17.00589308 |                |
| 22.13393826                          | 24.38220997                                           | 27.72809951 |             |                |
| ENSG00000119714                      | 362.9003864                                           | 437.1876056 | 444.0718103 |                |
| 227.9130689                          | 285.372957                                            | 310.5500563 | 414.7199341 |                |
| 274.6120274                          | 0.59346232                                            | 0.012609815 | 0.082399344 | GPR68          |
| 14                                   | 91232532                                              | 91253925    | - 3278      |                |
| protein_coding                       | G protein-coupled receptor 68 [Source:HGNC            |             |             |                |
| Symbol;Acc:HGNC:4519]                | -                                                     | 400         | 494         | 382 220 250    |
| 360                                  | 5.97557533                                            | 7.140760062 | 7.250388202 |                |
| 3.729286725                          | 4.687900871                                           | 5.106514503 |             |                |
| ENSG00000160352                      | 220.4619847                                           | 138.944239  | 149.9614228 |                |
| 116.0284714                          | 82.18741163                                           | 68.14848458 | 169.7892155 |                |
| 88.78812254                          | 0.937752713                                           | 0.012619432 | 0.082431736 | ZNF714         |
| 19                                   | 21082159                                              | 21125270    | + 8033      |                |
| protein_coding                       | zinc finger protein 714 [Source:HGNC                  |             |             |                |
| Symbol;Acc:HGNC:27124]               | zf-C2H2                                               | 243         | 157         | 129 112 72     |
| 79                                   | 1.481348323                                           | 0.926079619 | 0.999122617 |                |
| 0.774733435                          | 0.55093719                                            | 0.457278037 |             |                |
| ENSG00000182199                      | 3112.778064                                           | 3978.053213 | 4173.345023 |                |
| 2969.085706                          | 3095.725838                                           | 2602.582    | 3754.725434 |                |
| 2889.131181                          | 0.378109744                                           | 0.012626295 | 0.082436772 | SHMT2          |
| 12                                   | 57229327                                              | 57234935    | + 4838      |                |
| protein_coding                       | serine hydroxymethyltransferase 2 [Source:HGNC        |             |             |                |
| Symbol;Acc:HGNC:10852]               | -                                                     | 3431        | 4495        | 3590 2866 2712 |
| 3017                                 | 34.72830105                                           | 44.02407836 | 46.16740149 |                |
| 32.91716055                          | 34.45650163                                           | 28.99615845 |             |                |
| ENSG00000076067                      | 707.6557535                                           | 530.1120967 | 676.5701402 |                |
| 406.09965                            | 413.2200418                                           | 509.8196758 | 638.1126635 |                |
| 443.0464559                          | 0.524774795                                           | 0.012629524 | 0.082436772 | RBMS2          |
| 12                                   | 56521929                                              | 56596196    | + 8808      |                |
| protein_coding                       | RNA binding motif single stranded interacting protein |             |             |                |
| 2 [Source:HGNC Symbol;Acc:HGNC:9909] | -                                                     | 780         | 599         | 582            |
| 392                                  | 362                                                   | 591         | 4.336566198 | 3.222374093    |
| 4.111047789                          | 2.472981143                                           | 2.526263369 | 3.119903728 |                |
| ENSG00000108669                      | 541.6288267                                           | 561.0869271 | 563.8084502 |                |
| 430.9628939                          | 402.9466153                                           | 340.7424229 | 555.508068  |                |

|                 |                                                                                           |                               |                        |             |
|-----------------|-------------------------------------------------------------------------------------------|-------------------------------|------------------------|-------------|
| 391.550644      | 0.505557966                                                                               | 0.01265093                    | 0.082546038            | CYTH1       |
| 17              | 78674048                                                                                  | 78782297                      | - 7754                 |             |
| protein_coding  | cytohesin 1 [Source:HGNC Symbol;Acc:HGNC:9501]                                            |                               |                        | -           |
| 597             | 634 485                                                                                   | 416 353                       | 395 3.770311372        |             |
|                 | 3.874270164                                                                               | 3.891551557                   | 2.98112082 2.798312864 |             |
|                 | 2.368657769                                                                               |                               |                        |             |
| ENSG00000131016 | 10.88701159                                                                               | 15.0449176                    | 17.43737475            |             |
| 50.76245625     | 28.5372957                                                                                | 62.97265031                   | 14.45643465            |             |
| 47.42413409     | -1.721645347                                                                              | 0.012671691                   | 0.082651012            | AKAP12      |
| 6               | 151239999                                                                                 | 151358557                     | + 8741                 |             |
| protein_coding  | A-kinase anchoring protein 12 [Source:HGNC Symbol;Acc:HGNC:370]                           |                               |                        | -           |
| 73              | 0.067227786                                                                               | 0.092154011                   | 0.106766987            | 25          |
| 0.311492076     | 0.175802987                                                                               | 0.388322682                   |                        |             |
| ENSG00000170909 | 153.3254133                                                                               | 230.983735                    | 306.8977956            |             |
| 260.0280922     | 394.9561725                                                                               | 551.2263499                   | 230.4023146            |             |
| 402.0702049     | -0.806663453                                                                              | 0.012683242                   | 0.082695863            | OSCAR       |
| 19              | 54094668                                                                                  | 54102692                      | - 2084                 |             |
| protein_coding  | "osteoclast associated, immunoglobulin-like receptor [Source:HGNC Symbol;Acc:HGNC:29960]" |                               |                        | -           |
| 251             | 346 639                                                                                   | 3.971162635                   | 5.934296391            | 264         |
| 7.881575839     | 6.692494925                                                                               | 10.20529926                   | 14.25719736            |             |
| ENSG00000068697 | 2396.957052                                                                               | 2277.092529                   | 2719.067969            |             |
| 2132.023163     | 1907.432845                                                                               | 1632.113074                   | 2464.372517            |             |
| 1890.523027     | 0.382480476                                                                               | 0.012723311                   | 0.082926545            |             |
| LAPTM4A 2       | 20032650                                                                                  | 20052028                      | - 1946                 |             |
| protein_coding  | lysosomal protein transmembrane 4 alpha [Source:HGNC Symbol;Acc:HGNC:6924]                |                               |                        | -           |
| 1892            | 66.4842327                                                                                | 62.65033407                   | 74.78151038            |             |
| 58.76443679     | 52.78140835                                                                               | 45.20737751                   |                        |             |
| ENSG00000230291 | 39.01179154                                                                               | 37.16979643                   | 45.33717435            |             |
| 94.27313304     | 77.62144432                                                                               | 95.75293403                   | 40.5062541             |             |
| 89.21583713     | -1.142527944                                                                              | 0.012787944                   | 0.083317106            |             |
| AC078817.1      | 12 80102899                                                                               | 80103333                      | - 435                  |             |
|                 | processed_pseudogene                                                                      | ribosomal protein L26 (RPL26) |                        |             |
| pseudogene      | - 43                                                                                      | 42 39                         | 91 68                  | 111         |
|                 | 4.840696811                                                                               | 4.574951288                   | 5.578047352            | 11.62422959 |
|                 | 9.608752696                                                                               | 11.86491797                   |                        |             |
| ENSG00000051128 | 1219.345298                                                                               | 1386.787405                   | 1354.302772            |             |
| 1092.946762     | 1012.503252                                                                               | 904.9083585                   | 1320.145158            |             |
| 1003.452791     | 0.396085767                                                                               | 0.012826758                   | 0.083539218            | HOMER3      |
| 19              | 18929201                                                                                  | 18941261                      | - 3422                 |             |
| protein_coding  | homer scaffold protein 3 [Source:HGNC Symbol;Acc:HGNC:17514]                              |                               |                        | -           |
| 1049            | 19.23304054                                                                               | 21.69778653                   | 21.18130758            | 887         |
| 17.13107033     | 15.93275855                                                                               | 14.25366348                   |                        |             |
| ENSG00000125826 | 1188.498765                                                                               | 1387.6724                     | 1134.59185             |             |
| 1341.579201     | 1812.689023                                                                               | 1856.399225                   | 1236.921005            |             |
| 1670.222483     | -0.433003774                                                                              | 0.01283622                    | 0.083570074            | RBCK1       |
| 20              | 407498 430966                                                                             | + 4024                        | protein_coding         |             |



RANBP2-type and C3HC4-type zinc finger containing 1 [Source:HGNC  
Symbol;Acc:HGNC:15864] - 1310 1568 976 1295 1588  
2152 15.94197072 18.4635211 15.09032844  
17.88231909 24.25715628 24.86653728  
ENSG00000104728 39.9190425 30.08983521 13.9498998  
6.215810969 6.848950969 3.450556181 27.98625917  
5.50510604 2.360886055 0.012858689 0.083685561  
ARHGEF10 8 1823976 1958641 + 10792 protein\_coding  
Rho guanine nucleotide exchange factor 10 [Source:HGNC  
Symbol;Acc:HGNC:14103] - 44 34 12 6 6  
4 0.199654647 0.149280617 0.069180892  
0.030893091 0.034174068 0.017234118  
ENSG00000177963 2366.110519 2557.635993 2192.459252  
2510.151663 3329.731663 3501.451885 2372.068588  
3113.778404 -0.392407323 0.012868638 0.083694032 RIC8A  
11 207511 215113 + 6685 protein\_coding RIC8  
guanine nucleotide exchange factor A [Source:HGNC  
Symbol;Acc:HGNC:29550] - 2608 2890 1886 2423 2917  
4059 19.10446407 20.48438228 17.55282906  
20.14021239 26.82145773 28.23245586  
ENSG00000171608 1419.847762 1782.380238 2330.795758  
1482.470916 1332.120963 1164.562711 1844.341253  
1326.384864 0.475226773 0.012869454 0.083694032 PIK3CD  
1 9651732 9729114 + 6332  
protein\_coding "phosphatidylinositol-4,5-bisphosphate 3-kinase  
catalytic subunit delta [Source:HGNC Symbol;Acc:HGNC:8977]" -  
1565 2014 2005 1431 1167 1350 12.10325321  
15.07110171 19.7006392 12.5577193 11.32862784  
9.913428542  
ENSG00000140848 1067.834387 1136.333777 1327.565464  
894.0408111 973.6925294 727.2047152 1177.244543  
864.9793519 0.445063194 0.012899507 0.08385865 CPNE2  
16 57092537 57148367 + 7781  
protein\_coding copine 2 [Source:HGNC Symbol;Acc:HGNC:2315] -  
1177 1284 1142 863 853 843 7.407467097  
7.819087069 9.131403528 6.162932684 6.738464986  
5.037594167  
ENSG00000198060 1071.463391 1047.834261 1092.742151  
1418.24087 1268.197421 1480.288602 1070.679934  
1388.908964 -0.376014051 0.012915543 0.083923522 5-Mar  
10 92291163 92353964 + 4632  
protein\_coding membrane associated ring-CH-type finger 5 [Source:HGNC  
Symbol;Acc:HGNC:26025] - 1181 1184 940 1369 1111  
1716 12.48561763 12.11182515 12.6260106  
16.42279006 14.74323773 17.2258139  
ENSG00000111859 331.1466026 247.7986429 242.9607548  
131.5679989 205.4685291 157.0003062 273.9686668  
164.6789447 0.736643874 0.012918975 0.083923522 NEDD9  
6 11183298 11382348 - 10359  
protein\_coding "neural precursor cell expressed, developmentally

|                                                                       |        |     |
|-----------------------------------------------------------------------|--------|-----|
| down-regulated 9 [Source:HGNC Symbol;Acc:HGNC:7733]"                  | -      | 365 |
| 280 209 127 180 182 1.725455308                                       |        |     |
| 1.280756708 1.255264653 0.681236535 1.068075695                       |        |     |
| 0.816929489                                                           |        |     |
| ENSG00000134569 392.8396683 396.4778286 316.1977288                   |        |     |
| 324.2581389 159.8088559 170.802531 368.5050752                        |        |     |
| 218.2898419 0.756515177 0.012926906 0.083944213                       | LRP4   |     |
| 11 46856868 46918642 - 8597                                           |        |     |
| protein_coding LDL receptor related protein 4 [Source:HGNC            |        |     |
| Symbol;Acc:HGNC:6696] - 433 448 272 313                               | 140    |     |
| 198 2.466434878 2.469207163 1.968470106                               |        |     |
| 2.02306322 1.000987073 1.070900895                                    |        |     |
| ENSG00000135823 970.7585336 877.0301967 842.8064462                   |        |     |
| 1052.543991 1235.094158 1289.645373 896.8650588                       |        |     |
| 1192.427841 -0.410754413 0.012963081 0.084148232                      | STX6   |     |
| 1 180972712 181023121 - 6477                                          |        |     |
| protein_coding syntaxin 6 [Source:HGNC Symbol;Acc:HGNC:11441] -       |        |     |
| 1070 991 725 1016 1082 1495 8.089814516                               |        |     |
| 7.249802878 6.964195531 8.716293679 10.26835143                       |        |     |
| 10.73243616                                                           |        |     |
| ENSG00000049249 63.50756762 106.1994184 218.5484302                   |        |     |
| 67.33795217 53.65011592 43.99459131 129.4184721                       |        |     |
| 54.9942198 1.232367804 0.012987838 0.084278011                        |        |     |
| TNFRSF9 1 7915894 7943165 - 6331 protein_coding TNF                   |        |     |
| receptor superfamily member 9 [Source:HGNC Symbol;Acc:HGNC:11924]     |        |     |
| - 70 120 188 65 47 51                                                 |        |     |
| 0.541445078 0.89812208 1.847533757 0.570496635                        |        |     |
| 0.456323573 0.374566455                                               |        |     |
| ENSG00000126010 19.95952125 10.61994184 16.2748831                    |        |     |
| 3.107905485 0 0 15.6181154 1.035968495                                |        |     |
| 3.931281329 0.01301666 0.084434064 GRPR X                             |        |     |
| 16123556 16153021 + 1929 protein_coding                               |        |     |
| gastrin releasing peptide receptor [Source:HGNC Symbol;Acc:HGNC:4609] |        |     |
| - 22 12 14 3 0 0                                                      |        |     |
| 0.558494804 0.294764691 0.451546681 0.086417375 0                     |        |     |
| 0                                                                     |        |     |
| ENSG00000119599 579.7333673 671.7113212 611.4706078                   |        |     |
| 876.4293467 795.6198042 839.3477911 620.9717654                       |        |     |
| 837.132314 -0.430876695 0.01302207 0.084438198                        | DCAF4  |     |
| 14 72926332 72959703 + 5581                                           |        |     |
| protein_coding DDB1 and CUL4 associated factor 4 [Source:HGNC         |        |     |
| Symbol;Acc:HGNC:20229] - 639 759 526 846                              | 697    |     |
| 973 5.606831688 6.444009829 5.86381916                                |        |     |
| 8.423069501 7.676585932 8.106471046                                   |        |     |
| ENSG00000197024 381.9526567 422.142688 359.2099198                    |        |     |
| 483.7972871 611.8396199 566.7538527 387.7684215                       |        |     |
| 554.1302533 -0.514014581 0.013028642 0.084449854                      | ZNF398 |     |
| 7 149126416 149182802 + 6041                                          |        |     |
| protein_coding zinc finger protein 398 [Source:HGNC                   |        |     |
| Symbol;Acc:HGNC:18373] zf-C2H2 421 477 309 467                        | 536    |     |

|                        |                                                      |             |                      |                  |             |
|------------------------|------------------------------------------------------|-------------|----------------------|------------------|-------------|
| 657                    | 3.412730106                                          | 3.741415871 | 3.182412637          |                  |             |
| 4.295562956            | 5.45385157                                           | 5.056937102 |                      |                  |             |
| ENSG00000107338        | 194.1517067                                          | 348.6880903 | 373.1598196          |                  |             |
| 210.3016045            | 159.8088559                                          | 166.4893357 | 305.3332056          |                  |             |
| 178.8665987            | 0.770306638                                          | 0.013040208 | 0.084459545          | SHB              |             |
| 9                      | 37919134                                             | 38069211    | -                    | 2783             |             |
| protein_coding         | SH2 domain containing adaptor protein B [Source:HGNC |             |                      |                  |             |
| Symbol;Acc:HGNC:10838] | -                                                    | 214         | 394                  | 321              | 203         |
| 193                    | 3.765557213                                          | 6.708253352 | 7.176268388          | 140              |             |
| 4.05317052             | 3.09216165                                           | 3.224594588 |                      |                  |             |
| ENSG00000116044        | 1503.314851                                          | 1241.6482   | 1384.527555          |                  |             |
| 1969.376109            | 1735.067579                                          | 1667.481275 | 1376.496868          |                  |             |
| 1790.641654            | -0.379411807                                         | 0.01304167  | 0.084459545          | NFE2L2           |             |
| 2                      | 177227595                                            | 177392697   | -                    | 5979             |             |
| protein_coding         | "nuclear factor, erythroid 2 like 2 [Source:HGNC     |             |                      |                  |             |
| Symbol;Acc:HGNC:7782]" | TF_bZIP                                              | 1657        | 1403                 | 1191             | 1901        |
| 1933                   | 13.57133711                                          | 11.11873958 | 12.39338824          | 1520             |             |
| 17.66711382            | 15.62652441                                          | 15.03260752 |                      |                  |             |
| ENSG00000171155        | 489.9155216                                          | 565.5119028 | 582.4083166          |                  |             |
| 410.243524             | 417.7860091                                          | 269.1433821 | 545.945247           |                  |             |
| 365.7243051            | 0.579654323                                          | 0.013054244 | 0.084459545          |                  |             |
| C1GALT1C1              | X                                                    | 120625793   | 120630150            | -                | 1785        |
| protein_coding         | C1GALT1 specific chaperone 1 [Source:HGNC            |             |                      |                  |             |
| Symbol;Acc:HGNC:24338] | -                                                    | 540         | 639                  | 501              | 396         |
| 312                    | 14.81440533                                          | 16.96246945 | 17.4624973           | 366              |             |
| 12.32732963            | 12.6034727                                           | 8.127320598 |                      |                  |             |
| ENSG00000279861        | 7.258007728                                          | 10.61994184 | 6.974949899          | 0                |             |
| 0                      | 0                                                    | 8.284299822 | 0                    | 5.484511628      |             |
| 0.013054942            | 0.084459545                                          | AC073548.1  | 19                   | 47487638         |             |
| 47489519               | -                                                    | 1882        | TEC                  | TEC              | -           |
| 12                     | 6                                                    | 0           | 0                    | 0                | 8           |
| 0.302125977            | 0.198352865                                          | 0           | 0                    | 0                |             |
| ENSG00000227082        | 7.258007728                                          | 10.61994184 | 6.974949899          | 0                |             |
| 0                      | 0                                                    | 8.284299822 | 0                    | 5.484511628      |             |
| 0.013054942            | 0.084459545                                          | AC244021.1  | 1                    | 121396754        |             |
| 121463429              | +                                                    | 4658        | lincRNA              | novel transcript |             |
| -                      | 8                                                    | 12          | 6                    | 0                | 0           |
| 0.084104491            | 0.122069791                                          | 0.080141711 | 0                    | 0                | 0           |
| ENSG00000247151        | 12.70151352                                          | 1.769990306 | 11.6249165           | 0                |             |
| 0                      | 0                                                    | 8.698806776 | 0                    | 5.551751403      |             |
| 0.01305931             | 0.084459545                                          | CSTF3-DT    | 11                   | 33161657         |             |
| 33191598               | +                                                    | 4012        | processed_transcript | CSTF3            |             |
| divergent transcript   | [Source:HGNC Symbol;Acc:HGNC:27882]                  |             |                      |                  |             |
| 14                     | 2                                                    | 10          | 0                    | 0                | 0.170881794 |
| 0.023620849            | 0.155076476                                          | 0           | 0                    | 0                |             |
| ENSG00000063244        | 5725.660846                                          | 6791.452805 | 6680.839512          |                  |             |
| 4359.355427            | 5160.684555                                          | 5570.922954 | 6399.317721          |                  |             |
| 5030.320979            | 0.347107034                                          | 0.013064122 | 0.084459545          | U2AF2            |             |
| 19                     | 55654146                                             | 55674715    | +                    | 4115             |             |
| protein_coding         | U2 small nuclear RNA auxiliary factor 2 [Source:HGNC |             |                      |                  |             |

|                                     |                                                      |                                      |                |                        |             |        |
|-------------------------------------|------------------------------------------------------|--------------------------------------|----------------|------------------------|-------------|--------|
| Symbol;Acc:HGNC:23156]              | -                                                    | 6311                                 | 7674           | 5747                   | 4208        | 4521   |
| 6458                                | 75.10295484                                          | 88.36461633                          |                | 86.89168201            |             |        |
| 56.82218572                         | 67.53237567                                          | 72.972499                            |                |                        |             |        |
| ENSG00000136425                     | 56.24955989                                          | 67.25963164                          |                | 81.37441549            |             |        |
| 26.93518087                         | 25.11282022                                          | 29.32972754                          |                | 68.29453567            |             |        |
| 27.12590954                         | 1.328543174                                          | 0.013068335                          |                | 0.084459545            |             | CIB2   |
| 15                                  | 78104606                                             | 78131544                             |                | -                      | 2146        |        |
| protein_coding                      | calcium and integrin binding family member 2         |                                      |                |                        |             |        |
| [Source:HGNC Symbol;Acc:HGNC:24579] | -                                                    | 62                                   | 76             |                        |             | 70     |
| 26                                  | 22                                                   | 34                                   | 1.41478568     | 1.678070936            |             |        |
| 2.029435107                         | 0.67321793                                           | 0.630144752                          |                | 0.73668227             |             |        |
| ENSG00000132819                     | 581.5478692                                          | 800.0356184                          |                | 726.5572812            |             |        |
| 873.3214412                         | 972.5510376                                          | 1061.046026                          |                | 702.7135896            |             |        |
| 968.9728348                         | -0.463988437                                         | 0.013094432                          |                | 0.084597302            |             | RBM38  |
| 20                                  | 57391407                                             | 57409333                             |                | +                      | 2686        |        |
| protein_coding                      | RNA binding motif protein 38                         |                                      |                |                        |             |        |
| [Source:HGNC Symbol;Acc:HGNC:15818] | -                                                    | 641                                  | 904            | 625                    | 843         | 852    |
| 1230                                | 11.68639886                                          | 15.94736238                          |                | 14.47707604            |             |        |
| 17.43948316                         | 19.49759058                                          | 21.2926699                           |                |                        |             |        |
| ENSG00000128944                     | 954.4280162                                          | 823.9304876                          |                | 870.7062458            |             |        |
| 680.6313012                         | 714.5738844                                          | 512.4075929                          |                | 883.0215832            |             |        |
| 635.8709262                         | 0.475087613                                          | 0.013102749                          |                | 0.084620125            |             | KNSTRN |
| 15                                  | 40382721                                             | 40394246                             |                | +                      | 3654        |        |
| protein_coding                      | kinetochore localized astrin (SPAG5) binding protein |                                      |                |                        |             |        |
| [Source:HGNC Symbol;Acc:HGNC:30767] | -                                                    | 1052                                 | 931            |                        |             | 749    |
| 657                                 | 626                                                  | 594                                  | 14.09859647    | 12.07278812            |             |        |
| 12.75322792                         | 9.990997958                                          | 10.53060082                          |                | 7.558731525            |             |        |
| ENSG00000225151                     | 14.51601546                                          | 10.61994184                          |                | 4.6499666              |             |        |
| 20.7193699                          | 47.94265678                                          | 50.89570367                          |                | 9.928641298            |             |        |
| 39.85257678                         | -1.992952875                                         | 0.013157794                          |                | 0.084944605            |             |        |
| GOLGA2P7                            | 15                                                   | 84199311                             | 84230136       |                        |             | 4915   |
|                                     | transcribed_unprocessed_pseudogene                   |                                      |                | GOLGA2 pseudogene 7    |             |        |
| [Source:HGNC Symbol;Acc:HGNC:49516] | -                                                    | 16                                   | 12             |                        |             | 4      |
| 20                                  | 42                                                   | 59                                   | 0.159413517    | 0.115686895            |             |        |
| 0.050634126                         | 0.226109348                                          | 0.525258548                          |                | 0.558161025            |             |        |
| ENSG00000144406                     | 7.258007728                                          | 7.079961225                          |                | 10.46242485            |             | 0      |
| 0                                   | 0                                                    | 8.266797934                          | 0              | 5.478818324            |             |        |
| 0.013178226                         | 0.085022671                                          | UNC80                                | 2              | 209771993              |             |        |
| 209999300                           | +                                                    | 19258                                | protein_coding | "unc-80 homolog, NALCN |             |        |
| channel complex                     | subunit                                              | [Source:HGNC Symbol;Acc:HGNC:26582]" | -              |                        |             |        |
| 8                                   | 8                                                    | 9                                    | 0              | 0                      | 0.020342648 |        |
| 0.019683632                         | 0.029076235                                          | 0                                    | 0              | 0                      |             |        |
| ENSG00000116954                     | 740.3167882                                          | 850.4803421                          |                | 735.8572144            |             |        |
| 1059.79577                          | 1052.455466                                          | 976.5073993                          |                | 775.5514483            |             |        |
| 1029.586212                         | -0.408020021                                         | 0.013179499                          |                | 0.085022671            |             | RRAGC  |
| 1                                   | 38838198                                             | 38859823                             |                | -                      | 5167        |        |
| protein_coding                      | Ras related GTP binding C                            |                                      |                |                        |             |        |
| [Source:HGNC Symbol;Acc:HGNC:19902] | -                                                    | 816                                  | 961            | 633                    | 1023        | 922    |
| 1132                                | 7.733576409                                          | 8.81274831                           |                | 7.622055295            |             |        |
| 11.00143193                         | 10.96831261                                          | 10.18682824                          |                |                        |             |        |

|                                                                  |                                                        |             |             |             |                        |
|------------------------------------------------------------------|--------------------------------------------------------|-------------|-------------|-------------|------------------------|
| ENSG00000121966                                                  | 4.53625483                                             | 7.964956378 | 0           | 15.53952742 |                        |
|                                                                  | 23.97132839                                            | 43.99459131 | 4.167070403 | 27.83514904 |                        |
|                                                                  | -2.710960686                                           | 0.013191237 | 0.085067366 | CXCR4       | 2                      |
|                                                                  | 136114349                                              | 136118165   | -           | 2224        | protein_coding         |
|                                                                  | C-X-C motif chemokine receptor 4 [Source:HGNC          |             |             |             |                        |
| Symbol;Acc:HGNC:2561]                                            | -                                                      | 5           | 9           | 0           | 15 21                  |
|                                                                  | 51                                                     | 0.110094064 | 0.191749468 | 0           | 0.374773194            |
|                                                                  | 0.580405972                                            | 1.066268087 |             |             |                        |
| ENSG00000107223                                                  | 1119.547692                                            | 2230.187786 | 2318.00835  |             |                        |
| 1027.680747                                                      | 1172.312108                                            | 1551.025003 | 1889.247943 |             |                        |
| 1250.339286                                                      | 0.594714265                                            | 0.013198308 | 0.085081952 | EDF1        |                        |
|                                                                  | 9                                                      | 136862119   | 136866286   | -           | 1200                   |
| protein_coding                                                   | endothelial differentiation related factor 1           |             |             |             |                        |
| [Source:HGNC Symbol;Acc:HGNC:3164]                               | -                                                      |             | 1234        | 2520        | 1994                   |
|                                                                  | 992                                                    | 1027        | 1798        | 50.35731863 | 99.50519052            |
| 103.3833866                                                      | 45.93486769                                            | 52.6061547  | 69.66898116 |             |                        |
| ENSG00000103335                                                  | 9545.187413                                            | 10442.05781 | 11011.12091 |             |                        |
| 8484.581973                                                      | 7776.983825                                            | 8858.440356 | 10332.78871 |             |                        |
| 8373.335385                                                      | 0.303190653                                            | 0.013223913 | 0.085215958 | PIEZ01      |                        |
|                                                                  | 16                                                     | 88715338    | 88785220    | -           | 11292                  |
| protein_coding                                                   | piezo type mechanosensitive ion channel component 1    |             |             |             |                        |
| [Source:HGNC Symbol;Acc:HGNC:28993]                              | -                                                      |             | 10521       | 11799       | 9472                   |
|                                                                  | 8190                                                   | 6813        | 10269       | 45.62625619 | 49.51089448            |
| 52.18884272                                                      | 40.30185869                                            | 37.08641721 | 42.28519157 |             |                        |
| ENSG00000276710                                                  | 61.69306569                                            | 78.76456863 | 81.37441549 |             |                        |
| 140.8917153                                                      | 105.0172482                                            | 186.3300338 | 73.9440166  |             |                        |
| 144.0796658                                                      | -0.966227878                                           | 0.013230618 | 0.085228114 |             |                        |
| CSPG4P10                                                         | 15                                                     | 82459472    | 82477258    | +           | 7178                   |
|                                                                  | transcribed_unprocessed_pseudogene chondroitin sulfate |             |             |             |                        |
| proteoglycan 4 pseudogene 10 [Source:HGNC Symbol;Acc:HGNC:48361] | -                                                      | 68          | 89          | 70          | 136 92 216             |
|                                                                  | 0.463910436                                            | 0.58750693  | 0.606738331 | 1.052803931 |                        |
|                                                                  | 0.787828583                                            | 1.399204893 |             |             |                        |
| ENSG00000166167                                                  | 427.315205                                             | 463.7374602 | 419.6594856 |             |                        |
| 636.0846559                                                      | 541.0671266                                            | 656.4683135 | 436.9040503 |             |                        |
| 611.2066986                                                      | -0.48461352                                            | 0.013238398 | 0.085234038 | BTRC        |                        |
|                                                                  | 10                                                     | 101354033   | 101557321   | +           | 6613                   |
| protein_coding                                                   | beta-transducin repeat containing E3 ubiquitin protein |             |             |             |                        |
| ligase [Source:HGNC Symbol;Acc:HGNC:1144]                        | -                                                      |             |             | 471         | 524                    |
|                                                                  | 361                                                    | 614         | 474         | 761         | 3.487795941 3.75456135 |
|                                                                  | 3.396374142                                            | 5.159194395 | 4.405824353 | 5.350780703 |                        |
| ENSG00000165943                                                  | 320.259591                                             | 383.2029013 | 290.6229125 |             |                        |
| 459.9700117                                                      | 549.0575694                                            | 450.2975816 | 331.3618016 |             |                        |
| 486.4417209                                                      | -0.551731558                                           | 0.013241175 | 0.085234038 | MOAP1       |                        |
|                                                                  | 14                                                     | 93182196    | 93184928    | -           | 2537                   |
| protein_coding                                                   | modulator of apoptosis 1 [Source:HGNC                  |             |             |             |                        |
| Symbol;Acc:HGNC:16658]                                           | -                                                      | 353         | 433         | 250         | 444 481                |
|                                                                  | 522                                                    | 6.813698644 | 8.087119675 | 6.13093043  |                        |
| 9.724662695                                                      | 11.65391831                                            | 9.567116312 |             |             |                        |
| ENSG00000058866                                                  | 385.5816605                                            | 305.3233278 | 201.1110554 |             |                        |

|                        |                                            |                        |                |                |
|------------------------|--------------------------------------------|------------------------|----------------|----------------|
| 520.0561844            | 392.6731889                                | 502.9185634            | 297.3386813    |                |
| 471.8826456            | -0.664355257                               | 0.013265647            | 0.08535444     | DGKG           |
| 3                      | 186105668                                  | 186362237              | -              | 10978          |
| protein_coding         | diacylglycerol kinase gamma                | [Source:HGNC           |                |                |
| Symbol;Acc:HGNC:2853]  | -                                          | 425                    | 345            | 173            |
| 583                    | 1.895808155                                | 1.489094671            | 0.980459645    | 344            |
| 2.540929026            | 1.92611661                                 | 2.469314158            |                |                |
| ENSG00000151474        | 1425.291268                                | 1212.44336             | 1533.326486    |                |
| 1257.665753            | 894.9295933                                | 866.9522405            | 1390.353705    |                |
| 1006.515862            | 0.465918923                                | 0.01326953             | 0.08535444     | FRMD4A         |
| 10                     | 13643706                                   | 14462142               | -              | 14646          |
| protein_coding         | FERM domain containing 4A                  | [Source:HGNC           |                |                |
| Symbol;Acc:HGNC:25491] | -                                          | 1571                   | 1370           | 1319           |
| 1005                   | 5.252739204                                | 4.432288062            | 5.603154688    | 1214           |
| 4.605870262            | 3.290367396                                | 3.190641797            |                | 784            |
| ENSG00000163399        | 9946.19234                                 | 9554.407673            | 11471.4676     |                |
| 8789.156711            | 8388.823445                                | 7742.185431            | 10324.02254    |                |
| 8306.721862            | 0.31359709                                 | 0.013286951            | 0.08543543     | ATP1A1         |
| 1                      | 116372668                                  | 116410261              | +              | 7261           |
| protein_coding         | ATPase Na+/K+ transporting subunit alpha 1 | [Source:HGNC           |                |                |
| Symbol;Acc:HGNC:799]   | -                                          |                        | 10963          | 10796          |
| 8484                   | 7349                                       | 8975                   | 73.93697205    | 70.45192757    |
| 84.55505               | 64.92564409                                | 62.21271732            | 57.47368437    |                |
| ENSG00000159082        | 768.4415682                                | 683.2162582            | 620.770541     |                |
| 1049.436085            | 891.5051178                                | 876.44127              | 690.8094558    |                |
| 939.127491             | -0.442126216                               | 0.013291873            | 0.085436028    | SYNJ1          |
| 21                     | 32628759                                   | 32728048               | -              | 8070           |
| protein_coding         | synaptojanin 1                             | [Source:HGNC           |                |                |
| Symbol;Acc:HGNC:11503] | -                                          | 847                    | 772            | 534            |
| 5.139709336            | 4.532838088                                | 4.116940296            | 6.975060104    | 1013           |
| 5.948738241            | 5.853979421                                |                        |                | 781            |
| ENSG00000121851        | 254.0302705                                | 215.0538222            | 212.7359719    | 1016           |
| 107.7407235            | 86.75337894                                | 182.0168386            | 227.2733549    |                |
| 125.503647             | 0.852226297                                | 0.01330631             | 0.085497756    |                |
| POLR3GL 1              | 145964702                                  | 145978848              | +              | 1799           |
| protein_coding         | RNA polymerase III subunit G like          | [Source:HGNC           |                |                |
| Symbol;Acc:HGNC:28466] | -                                          | 280                    | 243            | 183            |
| 211                    | 7.621764954                                | 6.40031798             | 6.328878714    | 104            |
| 3.212286108            | 2.5967479                                  | 5.453587808            |                | 76             |
| ENSG00000155886        | 0                                          | 1.16249165             | 7.251779464    | 0              |
| 31.91764468            | 0.387497217                                | 13.05647471            | -5.22650743    |                |
| 0.013354248            | 0.085774619                                | SLC24A2 9              | 19507452       |                |
| 19786928               | -                                          | 10749                  | protein_coding | solute carrier |
| family 24 member 2     | [Source:HGNC                               | Symbol;Acc:HGNC:10976] | -              | 0              |
| 0                      | 1                                          | 7                      | 0              | 37             |
| 0.005788137            | 0.03618612                                 | 0                      | 0.160053317    | 0              |
| ENSG00000144810        | 938.0974988                                | 972.6096733            | 1321.753006    |                |
| 970.7024797            | 514.8128145                                | 680.6222067            | 1077.486726    |                |
| 722.0458337            | 0.576479288                                | 0.013375127            | 0.085877541    | COL8A1         |
| 3                      | 99638475                                   | 99799226               | +              | 9408           |

|                                  |                                    |                                |              |                 |             |                |   |
|----------------------------------|------------------------------------|--------------------------------|--------------|-----------------|-------------|----------------|---|
| protein_coding                   | collagen type VIII alpha 1 chain   | [Source:HGNC                   |              |                 |             |                |   |
| Symbol;Acc:HGNC:2215]            | -                                  | 1034                           | 1099         | 1137            | 937         | 451            |   |
| 789                              | 5.382101869                        | 5.535117245                    | 7.519171709  |                 |             |                |   |
| 5.53419332                       | 2.946636698                        | 3.899516054                    |              |                 |             |                |   |
| ENSG00000197646                  | 196.8734596                        | 259.3035799                    | 199.9485638  |                 |             |                |   |
| 346.0134773                      | 344.7305321                        | 318.3138077                    | 218.7085344  |                 |             |                |   |
| 336.3526057                      | -0.619342454                       | 0.013384271                    | 0.085889017  |                 |             |                |   |
| PDCD1LG2                         | 9                                  | 5510570                        | 5571254      | +               | 2365        | protein_coding |   |
|                                  | programmed cell death 1            | ligand 2                       | [Source:HGNC |                 |             |                |   |
| Symbol;Acc:HGNC:18731]           | -                                  | 217                            | 293          | 172             | 334         | 302            |   |
| 369                              | 4.493215748                        | 5.870335412                    | 4.5248496    |                 |             |                |   |
| 7.847428463                      | 7.849159568                        | 7.254813278                    |              |                 |             |                |   |
| ENSG00000076650                  | 421.8716992                        | 392.937848                     | 477.7840681  |                 |             |                |   |
| 555.2791133                      | 523.9447491                        | 837.622513                     | 430.8645384  |                 |             |                |   |
| 638.9487918                      | -0.570763575                       | 0.013391176                    | 0.085889017  |                 |             |                |   |
| GPATCH1 19                       | 33080880                           | 33130542                       | +            | 4488            |             |                |   |
| protein_coding                   | G-patch domain containing 1        | [Source:HGNC                   |              |                 |             |                |   |
| Symbol;Acc:HGNC:24658]           | -                                  | 465                            | 444          | 411             | 536         | 459            |   |
| 971                              | 5.073746774                        | 4.687664947                    | 5.697650692  |                 |             |                |   |
| 6.636269051                      | 6.286475068                        | 10.05998654                    |              |                 |             |                |   |
| ENSG00000136811                  | 1088.701159                        | 1054.914223                    | 1135.754342  |                 |             |                |   |
| 920.975992                       | 743.1111801                        | 803.9795902                    | 1093.123241  |                 |             |                |   |
| 822.6889208                      | 0.409616965                        | 0.013391481                    | 0.085889017  |                 |             | ODF2           |   |
| 9                                | 128455186                          | 128501292                      | +            | 6393            |             |                |   |
| protein_coding                   | outer dense fiber of sperm tails 2 | [Source:HGNC                   |              |                 |             |                |   |
| Symbol;Acc:HGNC:8114]            | -                                  | 1200                           | 1192         | 977             | 889         | 651            |   |
| 932                              | 9.191898608                        | 8.834825821                    | 9.508164918  |                 |             |                |   |
| 7.72696776                       | 6.259269404                        | 6.778634631                    |              |                 |             |                |   |
| ENSG00000282917                  | 0                                  | 0                              | 0            | 5.179842475     | 26.25431205 |                |   |
| 0                                | 0                                  | 10.47805151                    | -5.860157789 | 0.013406769     |             |                |   |
| 0.085955901                      | AC107068.2                         | 4                              | 47831385     |                 |             |                |   |
| 47896709                         | +                                  | 550                            | antisense    | uncharacterized |             |                |   |
| LOC101927179                     | [Source:NCBI gene;Acc:101927179]   | -                              | 0            | 0               |             |                |   |
| 0                                | 5                                  | 23                             | 0            | 0               |             |                |   |
| 0.505148838                      | 2.570469806                        | 0                              |              |                 |             |                |   |
| ENSG00000142937                  | 19301.7643                         | 25182.53708                    | 26396.69789  |                 |             |                |   |
| 27969.07743                      | 29880.83159                        | 32353.27739                    | 23626.99976  |                 |             |                |   |
| 30067.7288                       | -0.347835613                       | 0.013480321                    | 0.086396158  |                 |             | RPS8           |   |
| 1                                | 44775251                           | 44778779                       | +            | 2847            |             |                |   |
| protein_coding                   | ribosomal protein S8               | [Source:HGNC                   |              |                 |             |                |   |
| Symbol;Acc:HGNC:10441]           | -                                  | 21275                          | 28455        | 22707           | 26998       | 26177          |   |
| 37505                            | 365.9407595                        | 473.5845913                    | 496.2255702  |                 |             |                |   |
| 526.9339363                      | 565.1708657                        | 612.5375551                    |              |                 |             |                |   |
| ENSG00000261024                  | 0                                  | 0                              | 0            | 3.107905485     | 11.41491828 |                |   |
| 10.35166854                      | 0                                  | 8.291497437                    | -5.527530342 |                 |             |                |   |
| 0.013524393                      | 0.086639438                        | GS1-279B7.1                    | 1            | 185321157       |             |                |   |
| 185335039                        | -                                  | 1205                           |              |                 |             |                |   |
| transcribed_processed_pseudogene |                                    | microtubule associated protein |              |                 |             |                |   |
| 1 light chain 3 beta pseudogene  | [Source:NCBI gene;Acc:100288079]   |                                |              |                 |             |                |   |
| -                                | 0                                  | 0                              | 0            | 3               | 10          | 12             | 0 |

|                                                                                                               |                                              |             |             |             |                |
|---------------------------------------------------------------------------------------------------------------|----------------------------------------------|-------------|-------------|-------------|----------------|
| 0                                                                                                             | 0                                            | 0.138339516 | 0.510105861 | 0.463047152 |                |
| ENSG00000186567                                                                                               | 10.88701159                                  | 15.92991276 | 10.46242485 |             |                |
| 39.36680281                                                                                                   | 37.66923033                                  | 48.30778654 | 12.42644973 |             |                |
| 41.78127322                                                                                                   | -1.746169338                                 | 0.013528076 | 0.086639438 |             |                |
| CEACAM19                                                                                                      | 19                                           | 44662278    | 44684359    | +           | 5203           |
| protein_coding carcinoembryonic antigen related cell adhesion molecule 19 [Source:HGNC Symbol;Acc:HGNC:31951] |                                              |             |             |             |                |
|                                                                                                               | -                                            |             | 12          |             | 18             |
|                                                                                                               | 9                                            | 38          | 33          | 56          | 0.112942164    |
|                                                                                                               | 0.10762063                                   | 0.405827819 | 0.389858919 | 0.500455215 |                |
| ENSG00000210127                                                                                               | 16.33051739                                  | 7.079961225 | 2.3249833   | 0           |                |
|                                                                                                               | 0                                            | 0           | 8.578487304 | 0           | 5.537583249    |
| 0.013545882                                                                                                   | 0.086722082                                  | MT-TA       | MT          | 5587        | 5655           |
| 69                                                                                                            | Mt_tRNA mitochondrially encoded tRNA alanine |             |             |             |                |
| [Source:HGNC Symbol;Acc:HGNC:7475]                                                                            |                                              |             |             |             |                |
|                                                                                                               | -                                            |             | 18          | 8           | 2              |
|                                                                                                               | 0                                            | 0           | 12.77474083 | 5.493730325 |                |
| 1.803382087                                                                                                   | 0                                            | 0           | 0           |             |                |
| ENSG00000140832                                                                                               | 4.53625483                                   | 15.92991276 | 19.76235805 | 0           |                |
|                                                                                                               | 0                                            | 1.725278091 | 13.40950854 | 0.575092697 |                |
| 4.42844588                                                                                                    | 0.013565811                                  | 0.086818242 | MARVELD3    |             | 16             |
|                                                                                                               | 71626161                                     | 71642114    | +           | 6446        | protein_coding |
| MARVEL domain containing 3 [Source:HGNC Symbol;Acc:HGNC:30525]                                                |                                              |             |             |             |                |
|                                                                                                               | -                                            | 5           | 18          | 17          | 0              |
| 0.037984673                                                                                                   | 0.132314867                                  | 0.16408371  | 0           | 0           |                |
| 0.014426823                                                                                                   |                                              |             |             |             |                |
| ENSG00000077348                                                                                               | 1145.85797                                   | 1495.641809 | 1327.565464 |             |                |
| 1444.140082                                                                                                   | 1805.840072                                  | 2165.224004 | 1323.021748 |             |                |
| 1805.068053                                                                                                   | -0.448574478                                 | 0.013586936 | 0.086921991 |             | EXOSC5         |
| 19                                                                                                            | 41386374                                     | 41397479    | -           | 1488        |                |
| protein_coding exosome component 5 [Source:HGNC Symbol;Acc:HGNC:24662]                                        |                                              |             |             |             |                |
|                                                                                                               | -                                            | 1263        | 1690        | 1142        | 1394           |
|                                                                                                               | 2510                                         | 41.56512615 | 53.81585125 | 47.74963095 | 1582           |
| 52.05613095                                                                                                   | 65.35079996                                  | 78.43353848 |             |             |                |
| ENSG00000256060                                                                                               | 153.3254133                                  | 181.4240064 | 131.3615564 |             |                |
| 213.4095099                                                                                                   | 335.5985975                                  | 235.5004594 | 155.3703254 |             |                |
| 261.5028556                                                                                                   | -0.747819397                                 | 0.013593485 | 0.086932451 |             |                |
| TRAPPC2B                                                                                                      | 19                                           | 57363511    | 57365353    | +           | 1843           |
| protein_coding trafficking protein particle complex 2B                                                        |                                              |             |             |             |                |
| [Source:HGNC Symbol;Acc:HGNC:10710]                                                                           |                                              |             |             |             |                |
|                                                                                                               | -                                            |             | 169         | 205         | 113            |
|                                                                                                               | 206                                          | 294         | 273         | 4.490451943 | 5.270538216    |
| 3.814696184                                                                                                   | 6.210891304                                  | 9.805491226 | 6.887606543 |             |                |
| ENSG00000273328                                                                                               | 0.907250966                                  | 0.884995153 | 4.6499666   |             |                |
| 3.107905485                                                                                                   | 20.54685291                                  | 37.09347895 | 2.14740424  |             |                |
| 20.24941245                                                                                                   | -3.287983205                                 | 0.013599934 | 0.086942257 |             |                |
| AC099329.2                                                                                                    | 3                                            | 42809414    | 42908105    | +           | 3933           |
| processed_transcript novel transcript                                                                         |                                              |             |             |             |                |
|                                                                                                               | -                                            |             |             |             | 1              |
|                                                                                                               | 1                                            | 4           | 3           | 18          | 43             |
| 0.012047654                                                                                                   | 0.063276564                                  | 0.042384723 | 0.281316962 |             |                |
| 0.508364865                                                                                                   |                                              |             |             |             |                |
| ENSG00000275700                                                                                               | 2706.329632                                  | 3373.601524 | 3043.403139 |             |                |
| 3217.718145                                                                                                   | 3990.655431                                  | 4958.449232 | 3041.111432 |             |                |



|                                     |                                                    |             |             |             |
|-------------------------------------|----------------------------------------------------|-------------|-------------|-------------|
| 4055.607603                         | -0.415536362                                       | 0.013645264 | 0.08720053  | AATF        |
| 17                                  | 36948875                                           | 37056871    | + 4714      |             |
| protein_coding                      | apoptosis antagonizing transcription factor        |             |             |             |
| [Source:HGNC Symbol;Acc:HGNC:19235] | -                                                  | 2983        | 3812        | 2618        |
| 3106                                | 3496 5748                                          | 30.98791519 | 38.3168461  |             |
| 34.55309153                         | 36.61203905                                        | 45.58576066 | 56.69675452 |             |
| ENSG00000136854                     | 799.288101                                         | 621.2665975 | 685.8700734 |             |
| 788.3720246                         | 1103.822598                                        | 1043.793245 | 702.1415907 |             |
| 978.6626224                         | -0.478934018                                       | 0.013661791 | 0.087247532 | STXBP1      |
| 9                                   | 127579370                                          | 127696027   | + 9373      |             |
| protein_coding                      | syntaxin binding protein 1 [Source:HGNC            |             |             |             |
| Symbol;Acc:HGNC:11444]              | -                                                  | 881 702     | 590 761     | 967         |
| 1210                                | 4.602841021                                        | 3.548827877 | 3.916338673 |             |
| 4.5114701                           | 6.341547025                                        | 6.002577437 |             |             |
| ENSG00000090861                     | 5616.79073                                         | 6615.33877  | 7248.135437 |             |
| 7350.196471                         | 9090.84092                                         | 8350.345958 | 6493.421646 |             |
| 8263.79445                          | -0.347940828                                       | 0.013662483 | 0.087247532 | AARS        |
| 16                                  | 70252295                                           | 70289543    | - 4498      |             |
| protein_coding                      | alanyl-tRNA synthetase [Source:HGNC                |             |             |             |
| Symbol;Acc:HGNC:20]                 | -                                                  | 6191 7475   | 6235 7095   | 7964        |
| 9680                                | 67.40157368                                        | 78.74412957 | 86.24299962 |             |
| 87.64860177                         | 108.8326391                                        | 100.0660886 |             |             |
| ENSG00000165684                     | 645.9626878                                        | 959.334746  | 464.99666   |             |
| 875.3933782                         | 1013.644743                                        | 1255.139811 | 690.0980312 |             |
| 1048.059311                         | -0.601774654                                       | 0.013667893 | 0.087250579 | SNAPC4      |
| 9                                   | 136375577                                          | 136400168   | - 5045      |             |
| protein_coding                      | small nuclear RNA activating complex polypeptide 4 |             |             |             |
| [Source:HGNC Symbol;Acc:HGNC:11137] | MYB                                                | 712         | 1084        | 400         |
| 845                                 | 888 1455                                           | 6.911105245 | 10.18109647 |             |
| 4.932938117                         | 9.306954313                                        | 10.81929981 | 13.41012546 |             |
| ENSG00000143612                     | 4604.298652                                        | 5092.262111 | 5869.42034  |             |
| 6520.385707                         | 6772.471017                                        | 6236.017658 | 5188.660368 |             |
| 6509.624794                         | -0.327391793                                       | 0.013677591 | 0.08728099  |             |
| C1orf43 1                           | 154206696                                          | 154220637   | - 2670      |             |
| protein_coding                      | chromosome 1 open reading frame 43 [Source:HGNC    |             |             |             |
| Symbol;Acc:HGNC:29876]              | -                                                  | 5075 5754   | 5049 6294   | 5933        |
| 7229                                | 93.07937721                                        | 102.1139408 | 117.6524447 |             |
| 130.9867965                         | 136.5873399                                        | 125.8919561 |             |             |
| ENSG00000164050                     | 637.7974291                                        | 778.7957347 | 802.1192384 |             |
| 614.3293175                         | 485.134027                                         | 478.7646701 | 739.5708008 |             |
| 526.0760049                         | 0.491190538                                        | 0.013687608 | 0.08728543  | PLXNB1      |
| 3                                   | 48403854                                           | 48430051    | - 9733      |             |
| protein_coding                      | plexin B1 [Source:HGNC Symbol;Acc:HGNC:9103]       |             |             | -           |
| 703                                 | 880 690                                            | 593 425     | 555         | 3.537018124 |
| 4.284127522                         | 4.410717208                                        | 3.385478138 | 2.684043604 |             |
| 2.651412368                         |                                                    |             |             |             |
| ENSG00000129521                     | 212.296726                                         | 182.3090015 | 392.9221777 |             |
| 161.6110852                         | 164.3748233                                        | 101.7914073 | 262.5093017 |             |
| 142.5924386                         | 0.880144659                                        | 0.013692443 | 0.08728543  | EGLN3       |
| 14                                  | 33924231                                           | 34462774    | - 7359      |             |

|                        |                                                      |             |             |             |             |        |
|------------------------|------------------------------------------------------|-------------|-------------|-------------|-------------|--------|
| protein_coding         | egl-9 family hypoxia inducible factor 3 [Source:HGNC |             |             |             |             |        |
| Symbol;Acc:HGNC:14661] | -                                                    | 234         | 206         | 338         | 156         | 144    |
|                        | 118                                                  | 1.557133105 | 1.326401054 | 2.857621758 |             |        |
| 1.177925542            | 1.202793436                                          | 0.745579953 |             |             |             |        |
| ENSG00000068971        | 283.0623014                                          | 366.3879934 | 402.2221109 |             |             |        |
| 385.3802801            | 597.0002261                                          | 629.7265031 | 350.5574685 |             |             |        |
| 537.3690031            | -0.617720666                                         | 0.01369309  | 0.08728543  |             |             |        |
| PPP2R5B                | 11                                                   | 64917553    | 64934473    | +           | 3376        |        |
| protein_coding         | protein phosphatase 2 regulatory subunit B'beta      |             |             |             |             |        |
| [Source:HGNC           | Symbol;Acc:HGNC:9310]                                | -           | 312         | 414         | 346         |        |
|                        | 372                                                  | 523         | 730         | 4.525648705 | 5.810645012 |        |
| 6.376472741            | 6.122834852                                          | 9.522404177 | 10.05429076 |             |             |        |
| ENSG00000101442        | 367.4366412                                          | 338.0681485 | 283.6479626 |             |             |        |
| 494.1569721            | 505.6808799                                          | 438.220635  | 329.7175841 |             |             |        |
| 479.352829             | -0.537737092                                         | 0.013715179 | 0.087369348 |             |             | ACTR5  |
|                        | 20                                                   | 38748442    | 38772520    | +           | 2565        |        |
| protein_coding         | ARF5 actin related protein 5 homolog [Source:HGNC    |             |             |             |             |        |
| Symbol;Acc:HGNC:14671] | -                                                    | 405         | 382         | 244         | 477         | 443    |
|                        | 508                                                  | 7.732079973 | 7.056712666 | 5.918467996 |             |        |
| 10.33339553            | 10.61606862                                          | 9.208891603 |             |             |             |        |
| ENSG00000101152        | 3802.288798                                          | 4104.60752  | 3880.397127 |             |             |        |
| 3850.694896            | 5708.600633                                          | 6128.187778 | 3929.097815 |             |             |        |
| 5229.161102            | -0.412448469                                         | 0.013717485 | 0.087369348 |             |             | DNAJC5 |
|                        | 20                                                   | 63895182    | 63936031    | +           | 5287        |        |
| protein_coding         | DnaJ heat shock protein family (Hsp40) member C5     |             |             |             |             |        |
| [Source:HGNC           | Symbol;Acc:HGNC:16235]                               | -           | 4191        | 4638        | 3338        |        |
|                        | 3717                                                 | 5001        | 7104        | 38.81834665 | 41.56692279 |        |
| 39.28112058            | 39.06567155                                          | 58.14266103 | 62.47764635 |             |             |        |
| ENSG00000118816        | 5292.902136                                          | 4418.7808   | 5821.758183 |             |             |        |
| 6577.363974            | 6796.442345                                          | 6249.819883 | 5177.813706 |             |             |        |
| 6541.208734            | -0.337389944                                         | 0.013722327 | 0.087369348 |             |             | CCNI   |
|                        | 4                                                    | 77047158    | 77076005    | -           | 3741        |        |
| protein_coding         | cyclin I [Source:HGNC                                |             |             |             |             |        |
| Symbol;Acc:HGNC:1595]  | -                                                    | 5834        | 4993        | 5008        | 6349        | 5954   |
|                        | 7245                                                 | 76.36729366 | 97.82919554 |             |             |        |
|                        | 63.24122863                                          | 83.2881966  | 94.30390193 |             |             |        |
|                        | 90.04958169                                          |             |             |             |             |        |
| ENSG00000099326        | 435.4804637                                          | 555.7769562 | 296.4353707 |             |             |        |
| 504.516657             | 827.5815754                                          | 679.7595677 | 429.2309302 |             |             |        |
| 670.6192667            | -0.641475583                                         | 0.013726012 | 0.087369348 |             |             | MZF1   |
|                        | 19                                                   | 58561931    | 58573575    | -           | 6691        |        |
| protein_coding         | myeloid zinc finger 1 [Source:HGNC                   |             |             |             |             |        |
| Symbol;Acc:HGNC:13108] | zf-C2H2                                              | 480         | 628         | 255         | 487         | 725    |
|                        | 788                                                  | 3.513005996 | 4.447285952 | 2.37113345  |             |        |
| 4.04436157             | 6.660308363                                          | 5.47603488  |             |             |             |        |
| ENSG00000173852        | 3074.673524                                          | 2402.761841 | 2958.541249 |             |             |        |
| 2641.719662            | 1888.027484                                          | 1608.821819 | 2811.992204 |             |             |        |
| 2046.189655            | 0.458811163                                          | 0.013739436 | 0.087423338 |             |             |        |
| DPY19L1                | 7                                                    | 34928876    | 35038271    | -           | 6278        |        |
| protein_coding         | dpy-19 like C-mannosyltransferase 1 [Source:HGNC     |             |             |             |             |        |
| Symbol;Acc:HGNC:22205] | -                                                    | 3389        | 2715        | 2545        | 2550        | 1654   |

|                        |                                                      |                            |                 |             |
|------------------------|------------------------------------------------------|----------------------------|-----------------|-------------|
| 1865                   | 26.43497725                                          | 20.49155723                | 25.22163997     |             |
| 22.56996641            | 16.19427665                                          | 13.81301689                |                 |             |
| ENSG00000156011        | 2192.825585                                          | 1559.36146                 | 2398.220274     |             |
| 1677.232993            | 1552.428886                                          | 1234.436474                | 2050.135773     |             |
| 1488.032784            | 0.462295601                                          | 0.013780896                | 0.087655616     | PSD3        |
| 8                      | 18527301                                             | 19084730                   | - 15213         |             |
| protein_coding         | pleckstrin and Sec7 domain containing 3 [Source:HGNC |                            |                 |             |
| Symbol;Acc:HGNC:19093] | -                                                    | 2417 1762                  | 2063 1619       | 1360        |
| 1431                   | 7.780194759                                          | 5.488042673                | 8.437061393     |             |
| 5.913492184            | 5.495046898                                          | 4.373768441                |                 |             |
| ENSG00000176476        | 355.6423787                                          | 396.4778286                | 495.2214429     |             |
| 497.2648776            | 606.1321608                                          | 729.7926323                | 415.78055       |             |
| 611.0632235            | -0.557781367                                         | 0.01378818                 | 0.087670426     | SGF29       |
| 16                     | 28553915                                             | 28591790                   | + 2124          |             |
| protein_coding         | SAGA complex associated factor 29 [Source:HGNC       |                            |                 |             |
| Symbol;Acc:HGNC:25156] | -                                                    | 392 448                    | 426 480         | 531         |
| 846                    | 9.037748218                                          | 9.994243869                | 12.47848707     |             |
| 12.55737225            | 15.36693905                                          | 18.52025102                |                 |             |
| ENSG00000125046        | 6.350756762                                          | 8.849951531                | 9.299933199     | 0           |
| 0                      | 0                                                    | 8.166880497 0              | 5.462117506     |             |
| 0.013833442            | 0.087926613                                          | SSUH2 3                    | 8619400 8745040 | -           |
| 6279                   | protein_coding                                       | ssu-2 homolog (C. elegans) |                 |             |
| [Source:HGNC           | Symbol;Acc:HGNC:24809]                               | -                          | 7 10            | 8           |
| 0                      | 0                                                    | 0.05459291                 | 0.075463329     |             |
| 0.079269542            | 0                                                    | 0                          |                 |             |
| ENSG00000178105        | 1675.692534                                          | 1601.841227                | 1692.587842     |             |
| 2018.066628            | 2059.251258                                          | 2175.575672                | 1656.707201     |             |
| 2084.297853            | -0.331538354                                         | 0.013855931                | 0.088037915     | DDX10       |
| 11                     | 108665025                                            | 108940930                  | + 8653          |             |
| protein_coding         | DEAD-box helicase 10 [Source:HGNC                    |                            |                 |             |
| Symbol;Acc:HGNC:2735]  | -                                                    | 1847 1810                  | 1456 1948       | 1804        |
| 2522                   | 10.45270937                                          | 9.911475505                | 10.46891124     |             |
| 12.509337              | 12.81495807                                          | 13.55218734                |                 |             |
| ENSG00000168434        | 244.9577608                                          | 295.5883811                | 347.5850033     |             |
| 433.0348309            | 537.6426511                                          | 376.9732628                | 296.0437151     |             |
| 449.2169149            | -0.602021429                                         | 0.013916606                | 0.088391683     | COG7        |
| 16                     | 23388493                                             | 23453180                   | - 4343          |             |
| protein_coding         | component of oligomeric golgi complex 7 [Source:HGNC |                            |                 |             |
| Symbol;Acc:HGNC:18622] | -                                                    | 270 334                    | 299 418         | 471         |
| 437                    | 3.044406345                                          | 3.64403952                 | 4.283395791     |             |
| 5.348087401            | 6.666201515                                          | 4.678672278                |                 |             |
| ENSG00000229927        | 0                                                    | 2.654985459                | 4.6499666       | 26.93518087 |
| 22.82983656            | 11.21430759                                          | 2.43498402                 | 20.32644167     |             |
| -3.093578163           | 0.013928467                                          | 0.088427052                | RHEBP1          | 10          |
| 46634911               | 46635466                                             | - 556                      |                 |             |
| processed_pseudogene   | RHEB pseudogene 1 [Source:HGNC                       |                            |                 |             |
| Symbol;Acc:HGNC:10010] | -                                                    | 0 3                        | 4 26            | 20          |
| 13                     | 0                                                    | 0.255665957                | 0.447602029     | 2.598427477 |
| 2.211070368            | 1.087175305                                          |                            |                 |             |
| ENSG00000158859        | 188.7082009                                          | 165.4940936                | 204.5985304     |             |

|                           |                                                         |                              |                |                     |             |
|---------------------------|---------------------------------------------------------|------------------------------|----------------|---------------------|-------------|
| 131.5679989               | 106.15874                                               | 51.75834272                  | 186.2669416    |                     |             |
| 96.4950272                | 0.95231849                                              | 0.013932172                  | 0.088427052    |                     |             |
| ADAMTS4 1                 | 161184308                                               | 161199056                    | -              | 10334               |             |
| protein_coding            | ADAM metalloproteinase with thrombospondin type 1 motif |                              |                |                     |             |
| 4 [Source:HGNC            | Symbol;Acc:HGNC:220]                                    | -                            | 208            | 187                 | 176         |
| 127                       | 93                                                      | 60                           | 0.985651895    | 0.857431807         |             |
| 1.059622221               | 0.682884582                                             | 0.553174117                  | 0.269968946    |                     |             |
| ENSG00000137078           | 17.23776835                                             | 3.539980612                  | 4.6499666      | 0                   |             |
| 0                         | 0                                                       | 8.475905189                  | 0              | 5.518591829         |             |
| 0.013944351               | 0.088472609                                             | SIT1                         | 9              | 35649295            |             |
| 35650950                  | -                                                       | 1327                         | protein_coding | signaling threshold |             |
| regulating transmembrane  | adaptor 1 [Source:HGNC                                  |                              |                |                     |             |
| Symbol;Acc:HGNC:17710]    | -                                                       | 19                           | 4              | 4                   | 0           |
| 0                         | 0.701150683                                             | 0.142828709                  | 0.187540865    | 0                   |             |
| 0                         | 0                                                       |                              |                |                     |             |
| ENSG00000104312           | 701.3049967                                             | 769.0607881                  | 747.4821309    |                     |             |
| 862.9617563               | 1044.465023                                             | 1063.633943                  | 739.2826385    |                     |             |
| 990.353574                | -0.422041093                                            | 0.013950904                  | 0.088482446    | RIPK2               |             |
| 8                         | 89757747                                                | 89791063                     | +              | 3117                |             |
| protein_coding            | receptor interacting serine/threonine kinase 2          |                              |                |                     |             |
| [Source:HGNC              | Symbol;Acc:HGNC:10020]                                  | -                            | 773            | 869                 | 643         |
| 833                       | 915                                                     | 1233                         | 12.14426891    | 13.21020068         |             |
| 12.83456097               | 14.84978763                                             | 18.04395154                  | 18.39319997    |                     |             |
| ENSG00000131828           | 1061.48363                                              | 1079.694087                  | 1119.479459    |                     |             |
| 850.5301343               | 752.2431148                                             | 875.578631                   | 1086.885725    |                     |             |
| 826.1172933               | 0.394981213                                             | 0.013958798                  | 0.088500782    | PDHA1               |             |
| X                         | 19343893                                                | 19361705                     | +              | 4493                |             |
| protein_coding            | pyruvate dehydrogenase E1 alpha 1 subunit [Source:HGNC  |                              |                |                     |             |
| Symbol;Acc:HGNC:8806]     | -                                                       | 1170                         | 1220           | 963                 | 821         |
| 1015                      | 12.75199479                                             | 12.86618681                  | 13.33511346    | 659                 |             |
| 10.15357035               | 9.015635733                                             | 10.50414339                  |                |                     |             |
| ENSG00000072609           | 354.7351277                                             | 313.2882842                  | 326.6601536    |                     |             |
| 524.2000584               | 476.0020923                                             | 430.4568836                  | 331.5611885    |                     |             |
| 476.8863448               | -0.523736207                                            | 0.013989447                  | 0.088663323    | CHFR                |             |
| 12                        | 132822187                                               | 132956304                    | -              | 17127               |             |
| protein_coding            | checkpoint with forkhead and ring finger domains        |                              |                |                     |             |
| [Source:HGNC              | Symbol;Acc:HGNC:20455]                                  | -                            | 391            | 354                 | 281         |
| 506                       | 417                                                     | 499                          | 1.117954538    | 0.979373627         |             |
| 1.020779333               | 1.641652615                                             | 1.496587513                  | 1.354722257    |                     |             |
| ENSG00000215914           | 0.907250966                                             | 5.309970919                  | 20.9248497     | 0                   |             |
| 0                         | 0                                                       | 9.047357194                  | 0              | 5.604038299         |             |
| 0.014026549               | 0.08886663                                              | MMP23A                       | 1              | 1699942             | 1701782     |
| 1017                      | unprocessed_pseudogene                                  | matrix metalloproteinase 23A |                |                     |             |
| (pseudogene) [Source:HGNC | Symbol;Acc:HGNC:7170]                                   | -                            | 1              | 6                   |             |
| 18                        | 0                                                       | 0                            | 0              | 0.048151268         | 0.279548225 |
| 1.101180212               | 0                                                       | 0                            | 0              |                     |             |
| ENSG00000170323           | 22.68127415                                             | 15.0449176                   | 32.5497662     |                     |             |
| 7.251779464               | 0                                                       | 0                            | 23.42531932    | 2.417259821         |             |
| 3.285290241               | 0.01404579                                              | 0.088946674                  | FABP4          | 8                   |             |
| 81478419                  | 81483263                                                | -                            | 1396           | protein_coding      | fatty       |

|                                                           |                                                       |             |             |             |                |             |        |
|-----------------------------------------------------------|-------------------------------------------------------|-------------|-------------|-------------|----------------|-------------|--------|
| acid binding protein 4 [Source:HGNC Symbol;Acc:HGNC:3559] |                                                       |             |             |             |                |             | -      |
| 25                                                        | 17                                                    | 28          | 7           | 0           | 0              | 0.876967046 |        |
| 0.577018774                                               |                                                       | 1.247899066 |             | 0.278627941 | 0              | 0           |        |
| ENSG00000196704                                           | 1584.060187                                           |             | 1583.256329 |             | 1671.662993    |             |        |
| 1923.793495                                               | 1959.941469                                           |             | 2292.031943 |             | 1612.993169    |             |        |
| 2058.588969                                               | -0.352499973                                          |             | 0.01404924  |             | 0.088946674    |             | AMZ2   |
| 17                                                        | 68247574                                              |             | 68257164    |             | + 4214         |             |        |
| protein_coding                                            | archaelysin family metalloproteinase 2 [Source:HGNC   |             |             |             |                |             |        |
| Symbol;Acc:HGNC:28041]                                    | -                                                     |             | 1746        | 1789        | 1438           | 1857        | 1717   |
| 2657                                                      | 20.28982922                                           |             | 20.11602886 |             | 21.23103672    |             |        |
| 24.48665239                                               | 25.04512042                                           |             | 29.31757476 |             |                |             |        |
| ENSG00000138738                                           | 125.2006333                                           |             | 77.87957347 |             | 108.1117234    |             |        |
| 56.97826722                                               | 52.5086241                                            |             | 33.64292277 |             | 103.7306434    |             |        |
| 47.70993803                                               | 1.123982928                                           |             | 0.014055847 |             | 0.088946959    |             | PRDM5  |
| 4                                                         | 120684919                                             |             | 120922870   |             | - 9517         |             |        |
| protein_coding                                            | PR/SET domain 5 [Source:HGNC Symbol;Acc:HGNC:9349]    |             |             |             |                |             |        |
| zf-C2H2                                                   | 138                                                   | 88          | 93          | 55          | 46             | 39          |        |
| 0.710080687                                               | 0.438136106                                           |             | 0.607980606 |             | 0.321125404    |             |        |
| 0.29710169                                                | 0.190544122                                           |             |             |             |                |             |        |
| ENSG00000167670                                           | 2130.225268                                           |             | 2233.727766 |             | 1992.510688    |             |        |
| 1790.153559                                               | 1571.834247                                           |             | 1647.640576 |             | 2118.821241    |             |        |
| 1669.876128                                               | 0.34370741                                            |             | 0.014059342 |             | 0.088946959    |             | CHAF1A |
| 19                                                        | 4402662                                               | 4445018     | + 4299      |             | protein_coding |             |        |
| chromatin assembly factor 1 subunit A [Source:HGNC        |                                                       |             |             |             |                |             |        |
| Symbol;Acc:HGNC:1910]                                     | -                                                     |             | 2348        | 2524        | 1714           | 1728        | 1377   |
| 1910                                                      | 26.74603022                                           |             | 27.81943762 |             | 24.80562758    |             |        |
| 22.33512239                                               | 19.68855555                                           |             | 20.65841227 |             |                |             |        |
| ENSG00000176087                                           | 2124.781762                                           |             | 1979.734158 |             | 1921.598697    |             |        |
| 2282.238594                                               | 2656.251484                                           |             | 2705.236046 |             | 2008.704872    |             |        |
| 2547.908708                                               | -0.342950878                                          |             | 0.014072405 |             | 0.088997772    |             |        |
| SLC35A4 5                                                 | 140564456                                             |             | 140569103   |             | + 4023         |             |        |
| protein_coding                                            | solute carrier family 35 member A4 [Source:HGNC       |             |             |             |                |             |        |
| Symbol;Acc:HGNC:20753]                                    | -                                                     |             | 2342        | 2237        | 1653           | 2203        | 2327   |
| 3136                                                      | 28.50792068                                           |             | 26.34768074 |             | 25.56405055    |             |        |
| 30.42821724                                               | 35.55442921                                           |             | 36.24574574 |             |                |             |        |
| ENSG00000198791                                           | 3012.073207                                           |             | 2553.211017 |             | 2521.444389    |             |        |
| 3593.774709                                               | 3360.551942                                           |             | 3243.52281  |             | 2695.576204    |             |        |
| 3399.283154                                               | -0.334361996                                          |             | 0.014080736 |             | 0.089018631    |             | CNOT7  |
| 8                                                         | 17224964                                              |             | 17246878    |             | - 10943        |             |        |
| protein_coding                                            | CCR4-NOT transcription complex subunit 7 [Source:HGNC |             |             |             |                |             |        |
| Symbol;Acc:HGNC:14101]                                    | -                                                     |             | 3320        | 2885        | 2169           | 3469        | 2944   |
| 3760                                                      | 14.85697416                                           |             | 12.49211171 |             | 12.33190014    |             |        |
| 17.61489036                                               | 16.53669691                                           |             | 15.97653017 |             |                |             |        |
| ENSG00000139354                                           | 919.9524795                                           |             | 622.1515926 |             | 695.1700066    |             |        |
| 690.9909861                                               | 380.1167788                                           |             | 357.9952038 |             | 745.7580263    |             |        |
| 476.3676562                                               | 0.647249612                                           |             | 0.014116478 |             | 0.089212715    |             | GAS2L3 |
| 12                                                        | 100573683                                             |             | 100628286   |             | + 6799         |             |        |
| protein_coding                                            | growth arrest specific 2 like 3 [Source:HGNC          |             |             |             |                |             |        |
| Symbol;Acc:HGNC:27475]                                    | -                                                     |             | 1014        | 703         | 598            | 667         | 333    |
| 415                                                       | 7.303341313                                           |             | 4.899330359 |             | 5.472212949    |             |        |

|                                   |                                                |              |                  |                |  |    |
|-----------------------------------|------------------------------------------------|--------------|------------------|----------------|--|----|
| 5.451209039                       | 3.010554908                                    | 2.838141693  |                  |                |  |    |
| ENSG00000137494                   | 493.5445255                                    | 554.891961   | 417.3345023      |                |  |    |
| 613.293349                        | 788.7708533                                    | 671.9958163  | 488.5903296      |                |  |    |
| 691.3533395                       | -0.499027475                                   | 0.014139379  | 0.089325524      |                |  |    |
| ANKRD42 11                        | 83193739                                       | 83260694     | +                | 6724           |  |    |
| protein_coding                    | ankyrin repeat domain 42 [Source:HGNC          |              |                  |                |  |    |
| Symbol;Acc:HGNC:26752]            | -                                              | 544 627      | 359 592          | 691            |  |    |
| 779                               | 3.961866875                                    | 4.418412683  | 3.321800839      |                |  |    |
| 4.892220753                       | 6.31680838                                     | 5.38692304   |                  |                |  |    |
| ENSG00000271743                   | 32.66103478                                    | 15.92991276  | 2.3249833        |                |  |    |
| 3.107905485                       | 0 0                                            | 16.97197694  | 1.035968495      |                |  |    |
| 4.054284957                       | 0.014157812                                    | 0.089410045  | AF287957.1       | 8              |  |    |
| 6615604                           | 6617198 -                                      | 1595 lincRNA | novel transcript |                |  |    |
| -                                 | 36 18                                          | 2 3          | 0 0              |                |  |    |
| 1.105275382                       | 0.534734566                                    | 0.078014648  | 0.104513553      | 0              |  |    |
| 0                                 |                                                |              |                  |                |  |    |
| ENSG00000069696                   | 9.979760626                                    | 28.3198449   | 2.3249833        |                |  |    |
| 79.76957411                       | 18.26386925                                    | 73.32431885  | 13.54152961      |                |  |    |
| 57.11925407                       | -2.063505103                                   | 0.014204247  | 0.089654984      | DRD4           |  |    |
| 11                                | 637293 640706                                  | +            | 1477             | protein_coding |  |    |
| dopamine receptor D4 [Source:HGNC | Symbol;Acc:HGNC:3025]                          | -            |                  |                |  | 11 |
| 32                                | 2 77                                           | 16 85        | 0.364704291      |                |  |    |
| 1.026587386                       | 0.084247369                                    | 2.896825091  | 0.665866012      |                |  |    |
| 2.675897344                       |                                                |              |                  |                |  |    |
| ENSG00000068097                   | 1053.318372                                    | 1088.544038  | 1069.492318      |                |  |    |
| 1256.629784                       | 1459.968048                                    | 1438.019288  | 1070.451576      |                |  |    |
| 1384.872374                       | -0.371538415                                   | 0.014208274  | 0.089654984      | HEATR6         |  |    |
| 17                                | 60043194                                       | 60078931     | -                | 4868           |  |    |
| protein_coding                    | HEAT repeat containing 6 [Source:HGNC          |              |                  |                |  |    |
| Symbol;Acc:HGNC:24076]            | -                                              | 1161 1230    | 920 1213         | 1279           |  |    |
| 1667                              | 11.67912573                                    | 11.97239351  | 11.7582883       |                |  |    |
| 13.84593457                       | 16.14980694                                    | 15.92267565  |                  |                |  |    |
| ENSG00000168209                   | 704.0267496                                    | 654.8964133  | 3248.00167       |                |  |    |
| 208.2296675                       | 529.6522083                                    | 395.9513218  | 1535.641611      |                |  |    |
| 377.9443992                       | 2.022488552                                    | 0.014211802  | 0.089654984      | DDIT4          |  |    |
| 10                                | 72273920                                       | 72276036     | +                | 2058           |  |    |
| protein_coding                    | DNA damage inducible transcript 4 [Source:HGNC |              |                  |                |  |    |
| Symbol;Acc:HGNC:24944]            | -                                              | 776 740      | 2794 201         | 464            |  |    |
| 459                               | 18.46481813                                    | 17.03777153  | 84.4671572       |                |  |    |
| 5.427036352                       | 13.85861948                                    | 10.37046746  |                  |                |  |    |
| ENSG00000260296                   | 9.979760626                                    | 2.654985459  | 2.3249833        |                |  |    |
| 9.323716454                       | 18.26386925                                    | 63.83528935  | 4.986576462      |                |  |    |
| 30.47429169                       | -2.603440349                                   | 0.014228563  | 0.089728714      |                |  |    |
| AC095057.3                        | 4 40166675                                     | 40167831     | +                | 1157           |  |    |
| sense_overlapping                 | "novel transcript, overlapping N4BP2"          |              |                  |                |  |    |
| -                                 | 11 3                                           | 2 9          | 16 74            |                |  |    |
| 0.46557324                        | 0.122861082                                    | 0.107548283  | 0.432236257      |                |  |    |
| 0.850029472                       | 2.973920666                                    |              |                  |                |  |    |
| ENSG00000151240                   | 562.4955989                                    | 612.416646   | 789.3318303      |                |  |    |
| 456.8621063                       | 424.6349601                                    | 496.8800901  | 654.748025       |                |  |    |

|                                 |                                   |                        |                       |        |
|---------------------------------|-----------------------------------|------------------------|-----------------------|--------|
| 459.4590521                     | 0.508981606                       | 0.01423935             | 0.08976474            | DIP2C  |
| 10                              | 274190 689668                     | - 8563                 | protein_coding        | disco  |
| interacting protein 2 homolog C | [Source:HGNC                      | Symbol;Acc:HGNC:29150] |                       |        |
| -                               | 620 692                           | 679 441                | 372 576               |        |
| 3.545638292                     | 3.829187136                       | 4.933449385            | 2.861703859           |        |
| 2.670326441                     | 3.12771777                        |                        |                       |        |
| ENSG00000170759                 | 5722.939093                       | 4305.50142             | 5312.58684            |        |
| 4643.210794                     | 3820.573149                       | 2986.456375            | 5113.675784           |        |
| 3816.746773                     | 0.4221806                         | 0.014254789            | 0.089830053           | KIF5B  |
| 10                              | 32009010                          | 32056431               | - 5877                |        |
| protein_coding                  | kinesin family member 5B          | [Source:HGNC           |                       |        |
| Symbol;Acc:HGNC:6324]           | -                                 | 6308 4865              | 4570 4482             | 3347   |
| 3462                            | 52.56112807                       | 39.22415485            | 48.3801662            |        |
| 42.37680453                     | 35.00639443                       | 27.39065331            |                       |        |
| ENSG00000175197                 | 207.7604712                       | 299.1283618            | 268.5355711           |        |
| 418.5312719                     | 358.428434                        | 395.9513218            | 258.4748014           |        |
| 390.9703426                     | -0.597623066                      | 0.014261915            | 0.089842951           | DDIT3  |
| 12                              | 57516588                          | 57521737               | - 1307                |        |
| protein_coding                  | DNA damage inducible transcript 3 | [Source:HGNC           |                       |        |
| Symbol;Acc:HGNC:2726]           | TF_bZIP                           | 229 338                | 231 404               | 314    |
| 459                             | 8.580025495                       | 12.25370875            | 10.99621541           |        |
| 17.17583349                     | 14.76731098                       | 16.32932061            |                       |        |
| ENSG00000171877                 | 497.1735294                       | 444.2675669            | 412.6845357           |        |
| 373.9846267                     | 292.221908                        | 212.2092051            | 451.3752106           |        |
| 292.8052466                     | 0.626527521                       | 0.014275878            | 0.0898989             | FRMD5  |
| 15                              | 43870761                          | 44195252               | - 6673                |        |
| protein_coding                  | FERM domain containing 5          | [Source:HGNC           |                       |        |
| Symbol;Acc:HGNC:28214]          | -                                 | 548 502                | 355 361               | 256    |
| 246                             | 4.021500409                       | 3.564585475            | 3.309893918           |        |
| 3.006063295                     | 2.358121623                       | 1.714134912            |                       |        |
| ENSG00000184481                 | 219.5547338                       | 186.7339773            | 277.8355043           |        |
| 300.4308635                     | 358.428434                        | 408.8909075            | 228.0414051           |        |
| 355.916735                      | -0.645406806                      | 0.014304545            | 0.090036517           | FOXO4  |
| X                               | 71096197                          | 71103535               | + 3447                |        |
| protein_coding                  | forkhead box 04                   | [Source:HGNC           | Symbol;Acc:HGNC:7139] |        |
| Fork                            | 242 211                           | 239 290                | 314 474               |        |
| 3.43797541                      | 2.90046489                        | 4.313834348            | 4.674861601           |        |
| 5.599325632                     | 6.39393293                        |                        |                       |        |
| ENSG00000174099                 | 734.8732824                       | 632.7715345            | 823.0440881           |        |
| 625.7249709                     | 445.181813                        | 461.5118892            | 730.229635            |        |
| 510.8062244                     | 0.514936473                       | 0.014308134            | 0.090036517           | MSRB3  |
| 12                              | 65278643                          | 65491430               | + 7405                |        |
| protein_coding                  | methionine sulfoxide reductase B3 | [Source:HGNC           |                       |        |
| Symbol;Acc:HGNC:27375]          | -                                 | 810 715                | 708 604               | 390    |
| 535                             | 5.356592878                       | 4.575171938            | 5.948603762           |        |
| 4.532355005                     | 3.237329497                       | 3.35938468             |                       |        |
| ENSG00000122779                 | 788.4010894                       | 637.1965102            | 646.3453573           |        |
| 515.9123105                     | 405.229599                        | 542.5999595            | 690.6476523           |        |
| 487.9139563                     | 0.500456194                       | 0.014313002            | 0.090036517           | TRIM24 |
| 7                               | 138460334                         | 138589993              | + 9223                |        |

|                        |                                                        |              |             |      |             |       |
|------------------------|--------------------------------------------------------|--------------|-------------|------|-------------|-------|
| protein_coding         | tripartite motif containing 24                         | [Source:HGNC |             |      |             |       |
| Symbol;Acc:HGNC:11812] | -                                                      |              | 869         | 720  | 556         | 498   |
| 629                    | 4.613985776                                            |              | 3.699020419 |      | 3.750674964 |       |
| 3.000331059            | 2.36593879                                             |              | 3.171096475 |      |             |       |
| ENSG00000164330        | 116.1281236                                            |              | 73.45459771 |      | 123.2241149 |       |
| 38.33083431            | 66.20652603                                            |              | 36.2308399  |      | 104.2689454 |       |
| 46.92273342            | 1.155482649                                            |              | 0.014358548 |      | 0.090290921 | EBF1  |
| 5                      | 158695916                                              |              | 159099761   |      | -           | 6178  |
| protein_coding         | early B cell factor 1                                  | [Source:HGNC |             |      |             |       |
| Symbol;Acc:HGNC:3126]  | COE                                                    |              | 128         | 83   | 106         | 37    |
| 42                     | 1.014590401                                            |              | 0.636585335 |      | 1.06749244  |       |
| 0.332786625            | 0.577068608                                            |              | 0.316105756 |      |             |       |
| ENSG00000100949        | 563.4028499                                            |              | 664.63136   |      | 639.3704074 |       |
| 786.3000876            | 803.610247                                             |              | 946.3150327 |      | 622.4682058 |       |
| 845.4084558            | -0.442455586                                           |              | 0.014383739 |      | 0.090417185 |       |
| RABGGTA 14             | 24265538                                               |              | 24271739    |      | -           | 3545  |
| protein_coding         | Rab geranylgeranyltransferase subunit alpha            | [Source:HGNC |             |      |             |       |
| Symbol;Acc:HGNC:9795]  | -                                                      |              |             |      | 621         | 751   |
| 759                    | 704                                                    | 1097         | 8.578355581 |      | 10.03806811 |       |
| 9.652799747            | 11.89700324                                            |              | 12.20685483 |      | 14.38869498 |       |
| ENSG00000005812        | 1129.527453                                            |              | 1079.694087 |      | 1183.4165   |       |
| 852.6020713            | 921.1839053                                            |              | 823.8202882 |      | 1130.879346 |       |
| 865.868755             | 0.385384472                                            |              | 0.014412336 |      | 0.090542462 | FBXL3 |
| 13                     | 76992598                                               |              | 77027195    |      | -           | 7082  |
| protein_coding         | F-box and leucine rich repeat protein 3                | [Source:HGNC |             |      |             |       |
| Symbol;Acc:HGNC:13599] | -                                                      |              | 1245        | 1220 | 1018        | 823   |
| 955                    | 8.608789973                                            |              | 8.162634474 |      | 8.943318594 |       |
| 6.457374234            | 7.004303766                                            |              | 6.27015775  |      |             |       |
| ENSG00000067900        | 2219.135863                                            |              | 1404.487308 |      | 1963.448397 |       |
| 1665.83734             | 1158.614206                                            |              | 1130.919788 |      | 1862.357189 |       |
| 1318.457111            | 0.498257059                                            |              | 0.014413905 |      | 0.090542462 | ROCK1 |
| 18                     | 20946906                                               |              | 21111851    |      | -           | 11113 |
| protein_coding         | Rho associated coiled-coil containing protein kinase 1 | [Source:HGNC |             |      |             |       |
| Symbol;Acc:HGNC:10251] | -                                                      |              |             |      | 2446        | 1587  |
| 1608                   | 1015                                                   | 1311         | 10.77838821 |      | 6.766624132 |       |
| 9.45595032             | 8.040198551                                            |              | 5.614125129 |      | 5.485325395 |       |
| ENSG00000115128        | 1377.206966                                            |              | 1755.830384 |      | 1475.201904 |       |
| 1708.312048            | 2076.373635                                            |              | 2342.065008 |      | 1536.079751 |       |
| 2042.25023             | -0.410978991                                           |              | 0.014439645 |      | 0.09067195  | SF3B6 |
| 2                      | 24067584                                               |              | 24076443    |      | -           | 1197  |
| protein_coding         | splicing factor 3b subunit 6                           | [Source:HGNC |             |      |             |       |
| Symbol;Acc:HGNC:30096] | -                                                      |              | 1518        | 1984 | 1269        | 1649  |
| 2715                   | 62.10210264                                            |              | 78.53693678 |      | 65.95903882 |       |
| 76.54882854            | 93.40839479                                            |              | 105.464598  |      |             |       |
| ENSG00000156504        | 2306.231956                                            |              | 1880.6147   |      | 1856.499165 |       |
| 1865.779259            | 1322.989029                                            |              | 1251.689255 |      | 2014.448607 |       |
| 1480.152514            | 0.445037551                                            |              | 0.014447389 |      | 0.090688382 |       |
| FAM122B X              | 134769566                                              |              | 134797232   |      | -           | 4404  |
| protein_coding         | family with sequence similarity 122B                   | [Source:HGNC |             |      |             |       |
| Symbol;Acc:HGNC:30490] | -                                                      |              | 2542        | 2125 | 1597        | 1801  |
|                        |                                                        |              |             |      |             | 1159  |



|                                                                      |              |             |             |             |      |
|----------------------------------------------------------------------|--------------|-------------|-------------|-------------|------|
| 1451                                                                 | 28.26551609  | 22.86325525 | 22.56131725 |             |      |
| 22.72366856                                                          | 16.17645991  | 15.31973032 |             |             |      |
| ENSG00000267280                                                      | 22.68127415  | 37.16979643 | 13.9498998  | 0           |      |
| 7.990442797                                                          | 0            | 24.60032346 | 2.663480932 |             |      |
| 3.259250336                                                          | 0.014463305  | 0.090756085 | TBX2-AS1    | 17          |      |
| 61393456                                                             | 61411555     | -           | 1206        | antisense   |      |
| TBX2 antisense RNA 1 [Source:HGNC Symbol;Acc:HGNC:50355]             |              |             |             |             |      |
| -                                                                    | 25           | 42          | 12          | 0           | 7    |
| 1.01512935                                                           | 1.650168997  | 0.619071463 | 0           | 0.356778021 |      |
| 0                                                                    |              |             |             |             |      |
| ENSG00000155755                                                      | 1010.677576  | 943.4048332 | 1054.379926 |             |      |
| 834.9906069                                                          | 698.5929988  | 728.0673542 | 1002.820779 |             |      |
| 753.8836533                                                          | 0.411256143  | 0.014474238 | 0.090764802 |             |      |
| TMEM237 2                                                            | 201620184    | 201643570   | -           | 7647        |      |
| protein_coding transmembrane protein 237 [Source:HGNC                |              |             |             |             |      |
| Symbol;Acc:HGNC:14432] -                                             |              |             |             |             |      |
| 844                                                                  | 7.133830466  | 6.605300123 | 7.37943384  |             | 612  |
| 5.856740682                                                          | 4.919349654  | 5.131949505 |             |             |      |
| ENSG00000119042                                                      | 866.4246725  | 781.4507202 | 711.4448897 |             |      |
| 675.4514587                                                          | 553.6235367  | 396.8139608 | 786.4400941 |             |      |
| 541.9629854                                                          | 0.538800012  | 0.014476439 | 0.090764802 | SATB2       |      |
| 2                                                                    | 199269500    | 199471266   | -           | 10958       |      |
| protein_coding SATB homeobox 2 [Source:HGNC Symbol;Acc:HGNC:21637]   |              |             |             |             |      |
| CUT                                                                  |              |             |             |             |      |
| 4.267767571                                                          | 3.818175163  | 3.474777276 | 3.306194075 |             |      |
| 2.720556832                                                          | 1.951899953  |             |             |             |      |
| ENSG00000087460                                                      | 14211.17913  | 13143.06302 | 20271.52939 |             |      |
| 12951.67812                                                          | 12878.31081  | 9753.859685 | 15875.25718 |             |      |
| 11861.28287                                                          | 0.42048952   | 0.014480088 | 0.090764802 | GNAS        |      |
| 20                                                                   | 58839718     | 58911192    | +           | 13320       |      |
| protein_coding GNAS complex locus [Source:HGNC Symbol;Acc:HGNC:4392] |              |             |             |             |      |
| -                                                                    |              |             |             |             |      |
| 57.58735519                                                          | 52.82967197  | 81.4515391  | 52.15396286 |             |      |
| 52.06300493                                                          | 39.47064155  |             |             |             |      |
| ENSG00000165527                                                      | 3202.59591   | 3364.751572 | 3421.212926 |             |      |
| 2726.669079                                                          | 2685.930272  | 2687.120626 | 3329.520136 |             |      |
| 2699.906659                                                          | 0.302320051  | 0.014487674 | 0.090780183 | ARF6        |      |
| 14                                                                   | 49893092     | 49897054    | +           | 3865        |      |
| protein_coding ADP ribosylation factor 6 [Source:HGNC                |              |             |             |             |      |
| Symbol;Acc:HGNC:659] -                                               |              |             |             |             |      |
| 3115                                                                 | 44.72536471  | 46.61106811 | 47.3748241  |             | 2353 |
| 37.83976498                                                          | 37.42137914  | 37.47482133 |             |             |      |
| ENSG00000147894                                                      | 323.8885949  | 307.0933181 | 287.1354375 |             |      |
| 401.955776                                                           | 624.39603    | 380.423819  | 306.0391168 |             |      |
| 468.9252083                                                          | -0.613555906 | 0.01451045  | 0.090890705 |             |      |
| C9orf72 9                                                            | 27546545     | 27573866    | -           | 6332        |      |
| protein_coding chromosome 9 open reading frame 72 [Source:HGNC       |              |             |             |             |      |
| Symbol;Acc:HGNC:28337] -                                             |              |             |             |             |      |
| 441                                                                  | 2.7609338    | 2.596659531 | 2.426961537 |             | 547  |
| 3.404888252                                                          | 5.309990943  | 3.238386657 |             |             |      |

|                                                                                          |                      |                                                     |             |                |        |
|------------------------------------------------------------------------------------------|----------------------|-----------------------------------------------------|-------------|----------------|--------|
| ENSG00000244161                                                                          | 10.88701159          | 8.849951531                                         | 4.6499666   | 0              |        |
| 0                                                                                        | 0                    | 8.128976574                                         | 0           | 5.458618873    |        |
| 0.014538254                                                                              | 0.091032627          | FLNB-AS1                                            | 3           | 58162547       |        |
| 58170636                                                                                 | -                    | 3709 antisense                                      |             | FLNB antisense |        |
| RNA 1 [Source:HGNC Symbol;Acc:HGNC:40239]                                                |                      |                                                     | -           | 12             | 10     |
| 4                                                                                        | 0                    | 0                                                   | 0.158435718 | 0.127752559    |        |
| 0.067098066                                                                              | 0                    | 0                                                   | 0           |                |        |
| ENSG0000054148                                                                           | 693.139738           | 1076.154106                                         | 1204.341349 |                |        |
| 504.516657                                                                               | 743.1111801          | 753.9465256                                         | 991.2117312 |                |        |
| 667.1914542                                                                              | 0.570239382          | 0.014564691                                         | 0.091165895 |                | PHPT1  |
| 9                                                                                        | 136848724            | 136851027                                           | +           | 1612           |        |
| protein_coding phosphohistidine phosphatase 1 [Source:HGNC Symbol;Acc:HGNC:30033]        | -                    | 764 1216                                            | 1036 487    | 651            |        |
| 874                                                                                      | 23.20903079          | 35.74332733                                         | 39.98541102 |                |        |
| 16.78711121                                                                              | 24.82351693          | 25.21026514                                         |             |                |        |
| ENSG00000255346                                                                          | 5.443505796          | 0                                                   | 25.5748163  | 0              | 0      |
| 0                                                                                        | 10.3394407           | 0                                                   | 5.797181252 | 0.014584762    |        |
| 0.091259235                                                                              | NOX5                 | 15                                                  | 68930525    | 69062743       |        |
| +                                                                                        | 12511 protein_coding | NADPH oxidase 5 [Source:HGNC Symbol;Acc:HGNC:14874] | -           | 6              | 0      |
| 0                                                                                        | 0.023484856          | 0                                                   | 0.109405084 | 0              | 0      |
| 0                                                                                        |                      |                                                     |             |                |        |
| ENSG00000119689                                                                          | 2068.532202          | 2135.493304                                         | 2222.684035 |                |        |
| 2517.403443                                                                              | 3131.112085          | 2546.510462                                         | 2142.236514 |                |        |
| 2731.67533                                                                               | -0.350490412         | 0.014617091                                         | 0.091429178 |                | DLST   |
| 14                                                                                       | 74881891             | 74903745                                            | +           | 4550           |        |
| protein_coding dihydrolipoamide S-succinyltransferase [Source:HGNC Symbol;Acc:HGNC:2911] | -                    | 2280 2413                                           | 1912 2430   | 2743           |        |
| 2952                                                                                     | 24.53873293          | 25.12883566                                         | 26.14468044 |                |        |
| 29.67610647                                                                              | 37.05627589          | 30.16726752                                         |             |                |        |
| ENSG00000153936                                                                          | 1707.446318          | 1478.826901                                         | 1771.637274 |                |        |
| 1376.80213                                                                               | 1273.90488           | 1170.601184                                         | 1652.636831 |                |        |
| 1273.769398                                                                              | 0.375621747          | 0.014625834                                         | 0.091429205 |                | HS2ST1 |
| 1                                                                                        | 86914648             | 87109998                                            | +           | 7429           |        |
| protein_coding heparan sulfate 2-O-sulfotransferase 1 [Source:HGNC Symbol;Acc:HGNC:5193] | -                    | 1882 1671                                           | 1524 1329   | 1116           |        |
| 1357                                                                                     | 12.40560487          | 10.65792187                                         | 12.76325527 |                |        |
| 9.940464215                                                                              | 9.23381558           | 8.493379067                                         |             |                |        |
| ENSG00000105048                                                                          | 205.0387183          | 290.2784102                                         | 381.2972612 |                |        |
| 338.7616978                                                                              | 489.6999943          | 589.1824679                                         | 292.2047966 |                |        |
| 472.5480533                                                                              | -0.696326678         | 0.014627432                                         | 0.091429205 |                | TNNT1  |
| 19                                                                                       | 55132794             | 55149354                                            | -           | 2171           |        |
| protein_coding "troponin T1, slow skeletal type [Source:HGNC Symbol;Acc:HGNC:11948]"     | -                    | 226 328                                             | 328 327     | 429            |        |
| 683                                                                                      | 5.097735515          | 7.158803819                                         | 9.399848778 |                |        |
| 8.369508849                                                                              | 12.14632309          | 14.62823398                                         |             |                |        |
| ENSG00000174748                                                                          | 27509.66379          | 30460.64818                                         | 32619.5157  |                |        |
| 35391.79169                                                                              | 37414.67765          | 37642.98002                                         | 30196.60922 |                |        |
| 36816.48312                                                                              | -0.286000874         | 0.014645445                                         | 0.09150946  |                | RPL15  |
| 3                                                                                        | 23916545             | 23924374                                            | +           | 7222           |        |



|                                                                  |              |          |             |             |             |                |             |
|------------------------------------------------------------------|--------------|----------|-------------|-------------|-------------|----------------|-------------|
|                                                                  | 1463         | 1560     | 1205        | 1162        | 860         | 1091           | 15.2399225  |
|                                                                  | 15.72391864  |          | 15.94790509 |             | 13.73497649 |                | 11.24489903 |
|                                                                  | 10.79109504  |          |             |             |             |                |             |
| ENSG00000142102                                                  | 221.3692357  |          |             | 160.1841227 |             | 101.1367735    |             |
| 98.41700702                                                      | 84.47039528  |          |             | 62.11001126 |             | 160.8967107    |             |
| 81.66580452                                                      | 0.983027205  |          |             | 0.014801678 |             | 0.092232948    | PGGHG       |
| 11                                                               | 289135       | 296107   | +           | 5260        |             | protein_coding |             |
| protein-glucosylgalactosylhydroxylysine glucosidase [Source:HGNC |              |          |             |             |             |                |             |
| Symbol;Acc:HGNC:26210]                                           | -            |          |             | 244         | 181         | 87             | 95          |
| 72                                                               | 2.271604737  |          |             | 1.63049425  |             | 1.029059189    | 74          |
| 1.003575163                                                      | 0.864755506  |          |             | 0.636469754 |             |                |             |
| ENSG00000104635                                                  | 4712.261517  |          |             | 5188.726583 |             | 6260.017535    |             |
| 4862.836115                                                      | 3942.712775  |          |             | 3575.638843 |             | 5387.001878    |             |
| 4127.062577                                                      | 0.384276802  |          |             | 0.014807355 |             | 0.092232948    |             |
| SLC39A14                                                         | 8            | 22367249 |             | 22434129    |             | +              | 6942        |
| protein_coding solute carrier family 39 member 14                |              |          |             |             |             |                |             |
| [Source:HGNC Symbol;Acc:HGNC:20858]                              | -            |          |             |             |             | 5194           | 5863        |
| 4694                                                             | 3454         | 4145     |             | 36.63920312 |             | 40.01858474    | 5385        |
| 48.26229222                                                      | 37.57253689  |          |             | 30.58335206 |             | 27.76329091    |             |
| ENSG00000231672                                                  | 158.768919   |          |             | 186.7339773 |             | 53.4746159     |             |
| 301.466832                                                       | 246.5622349  |          |             | 230.3246251 |             | 132.9925041    |             |
| 259.4512307                                                      | -0.958774506 |          |             | 0.014808162 |             | 0.092232948    | DIRC3       |
| 2                                                                | 217284019    |          |             | 217756593   |             | -              | 4665        |
| lincRNA disrupted in renal carcinoma 3 [Source:HGNC              |              |          |             |             |             |                |             |
| Symbol;Acc:HGNC:17805]                                           | -            |          |             | 175         | 211         | 46             | 291         |
| 267                                                              | 1.837025074  |          |             | 2.143173092 |             | 0.613497829    | 216         |
| 3.466198137                                                      | 2.846095465  |          |             | 2.661280375 |             |                |             |
| ENSG00000198743                                                  | 4741.293548  |          |             | 4401.080896 |             | 4691.816299    |             |
| 6364.990433                                                      | 5455.189447  |          |             | 5351.812637 |             | 4611.396915    |             |
| 5723.997505                                                      | -0.31182222  |          |             | 0.014846392 |             | 0.092438518    | SLC5A3      |
| 21                                                               | 34073570     |          |             | 34106262    |             | +              | 11576       |
| protein_coding solute carrier family 5 member 3 [Source:HGNC     |              |          |             |             |             |                |             |
| Symbol;Acc:HGNC:11038]                                           | -            |          |             | 5226        | 4973        | 4036           | 6144        |
| 6204                                                             | 22.1074968   |          |             | 20.35571595 |             | 21.69199452    | 4779        |
| 29.49203445                                                      | 25.37615817  |          |             | 24.91978489 |             |                |             |
| ENSG00000156463                                                  | 117.9426256  |          |             | 70.79961225 |             | 113.9241817    |             |
| 40.4027713                                                       | 23.97132839  |          |             | 63.83528935 |             | 100.8888065    |             |
| 42.73646301                                                      | 1.230414687  |          |             | 0.014854082 |             | 0.092453853    | SH3RF2      |
| 5                                                                | 145936579    |          |             | 146081791   |             | +              | 7232        |
| protein_coding SH3 domain containing ring finger 2 [Source:HGNC  |              |          |             |             |             |                |             |
| Symbol;Acc:HGNC:26299]                                           | -            |          |             | 130         | 80          | 98             | 39          |
| 74                                                               | 0.880265373  |          |             | 0.524152921 |             | 0.8430911      | 21          |
| 0.299652726                                                      | 0.178487677  |          |             | 0.475777961 |             |                |             |
| ENSG00000161203                                                  | 10301.83472  |          |             | 10908.45026 |             | 12007.37625    |             |
| 8624.43772                                                       | 9774.594525  |          |             | 8515.972655 |             | 11072.55374    |             |
| 8971.6683                                                        | 0.303542061  |          |             | 0.014872353 |             | 0.092535018    | AP2M1       |
| 3                                                                | 184174689    |          |             | 184184091   |             | +              | 4756        |
| protein_coding adaptor related protein complex 2 subunit mu 1    |              |          |             |             |             |                |             |
| [Source:HGNC Symbol;Acc:HGNC:564]                                | -            |          |             |             |             | 11355          | 12326       |
| 8325                                                             | 8563         | 9872     |             | 116.9160074 |             | 122.8023728    | 10329       |

|                                      |                        |                            |              |                  |                |        |   |
|--------------------------------------|------------------------|----------------------------|--------------|------------------|----------------|--------|---|
| 135.121133                           | 97.26451821            | 110.6703946                | 96.51488974  |                  |                |        |   |
| ENSG00000177200                      | 1974.178102            | 1677.065815                | 1690.262859  |                  |                |        |   |
| 1538.413215                          | 1321.847537            | 1244.788142                | 1780.502259  |                  |                |        |   |
| 1368.349631                          | 0.380268523            | 0.014881221                | 0.092557639  |                  |                | CHD9   |   |
| 16                                   | 53055033               | 53329150                   | +            | 16504            |                |        |   |
| protein_coding                       | chromodomain           | helicase                   | DNA binding  | protein 9        |                |        |   |
| [Source:HGNC                         | Symbol;Acc:HGNC:25701] | -                          | 2176         | 1895             |                | 1454   |   |
| 1485                                 | 1158                   | 1443                       | 6.456517903  | 5.440595527      |                |        |   |
| 5.481280637                          | 4.999761435            | 4.312873346                | 4.065445414  |                  |                |        |   |
| ENSG00000114126                      | 1991.41587             | 1855.834836                | 1461.252004  |                  |                |        |   |
| 2546.41056                           | 2268.144263            | 2141.932749                | 1769.500903  |                  |                |        |   |
| 2318.829191                          | -0.389262957           | 0.014904833                | 0.09267191   |                  |                | TFDP2  |   |
| 3                                    | 141944428              | 142149544                  | -            | 11897            |                |        |   |
| protein_coding                       | transcription          | factor Dp-2                | [Source:HGNC |                  |                |        |   |
| Symbol;Acc:HGNC:11751]               | E2F                    | 2195                       | 2097         | 1257             | 2458           | 1987   |   |
| 2483                                 | 9.034949855            | 8.351940846                | 6.57362102   |                  |                |        |   |
| 11.48038521                          | 10.26615379            | 9.704435461                |              |                  |                |        |   |
| ENSG00000273175                      | 0                      | 0                          | 0            | 23.97132839      |                |        |   |
| 6.038473317                          | 0                      | 10.00326724                | -5.794890678 | 0.014931668      |                |        |   |
| 0.092786448                          | BX323046.1             | 1                          | 244864738    |                  |                |        |   |
| 244865272                            | +                      | 535                        | lincRNA      | novel transcript |                | -      |   |
| 0                                    | 0                      | 0                          | 0            | 21               | 7              | 0      | 0 |
| 0                                    | 0                      | 2.412753048                | 0.608380487  |                  |                |        |   |
| ENSG00000272155                      | 0.907250966            | 15.92991276                | 9.299933199  |                  |                | 0      |   |
| 0                                    | 0                      | 8.71236564                 | 0            | 5.556175989      |                |        |   |
| 0.014933745                          | 0.092786448            | AC055822.1                 | 8            | 65714334         |                |        |   |
| 65714778                             | -                      | 445                        | antisense    | "novel           |                |        |   |
| transcript, antisense to MTFR1"      | -                      | 1                          | 18           | 8                | 0              |        |   |
| 0                                    | 0                      | 0.110044584                | 1.916632883  | 1.118502148      |                |        |   |
| 0                                    | 0                      | 0                          |              |                  |                |        |   |
| ENSG00000167695                      | 1124.083947            | 1452.277046                | 1207.828824  |                  |                |        |   |
| 1647.189907                          | 1499.920262            | 1841.734362                | 1261.396606  |                  |                |        |   |
| 1662.948177                          | -0.398878299           | 0.014949009                | 0.092848672  |                  |                | FAM57A |   |
| 17                                   | 732412                 | 742972                     | +            | 2740             | protein_coding | family |   |
| with sequence similarity 57 member A | [Source:HGNC           |                            |              |                  |                |        |   |
| Symbol;Acc:HGNC:29646]               | -                      | 1239                       | 1641         | 1039             | 1590           | 1314   |   |
| 2135                                 | 22.14366115            | 28.37817477                | 23.59238416  |                  |                |        |   |
| 32.24471964                          | 29.4776028             | 36.23083429                |              |                  |                |        |   |
| ENSG00000284753                      | 110.6846178            | 210.6288464                | 120.8991316  |                  |                |        |   |
| 234.1288798                          | 237.4303003            | 296.7478316                | 147.4041986  |                  |                |        |   |
| 256.1023372                          | -0.795527252           | 0.014960244                | 0.09288584   |                  |                |        |   |
| EEF1AKMT4                            | 3                      | 184249650                  | 184259585    | +                | 1823           |        |   |
| protein_coding                       | EEF1A                  | lysine methyltransferase 4 | [Source:HGNC |                  |                |        |   |
| Symbol;Acc:HGNC:53611]               | -                      | 122                        | 238          | 104              | 226            | 208    |   |
| 344                                  | 3.277191695            | 6.186097052                | 3.549388332  |                  |                |        |   |
| 6.888645155                          | 7.013325998            | 8.774104287                |              |                  |                |        |   |
| ENSG00000101773                      | 1933.351809            | 1696.535709                | 1669.338009  |                  |                |        |   |
| 1564.312427                          | 1106.105581            | 1321.563017                | 1766.408509  |                  |                |        |   |
| 1330.660342                          | 0.408560688            | 0.014970126                | 0.092914579  |                  |                | RBBP8  |   |
| 18                                   | 22798261               | 23026488                   | +            | 5091             |                |        |   |

|                                      |                                                     |             |             |             |      |       |
|--------------------------------------|-----------------------------------------------------|-------------|-------------|-------------|------|-------|
| protein_coding                       | "RB binding protein 8, endonuclease [Source:HGNC    |             |             |             |      |       |
| Symbol;Acc:HGNC:9891]"               | -                                                   | 2131        | 1917        | 1436        | 1510 | 969   |
| 1532                                 | 20.49788424                                         | 17.84207895 |             | 17.54923499 |      |       |
| 16.48108859                          | 11.69951989                                         | 13.99222198 |             |             |      |       |
| ENSG00000151689                      | 509.8750429                                         | 484.9773439 |             | 535.9086506 |      |       |
| 416.459335                           | 313.9102527                                         | 335.5665886 |             | 510.2536791 |      |       |
| 355.3120588                          | 0.521631195                                         | 0.015037639 |             | 0.093300878 |      | INPP1 |
| 2                                    | 190343470                                           | 190371665   |             | +           | 3676 |       |
| protein_coding                       | inositol polyphosphate-1-phosphatase [Source:HGNC   |             |             |             |      |       |
| Symbol;Acc:HGNC:6071]"               | -                                                   | 562         | 548         | 461         | 402  | 275   |
| 389                                  | 7.486683892                                         | 7.063687808 |             | 7.802472906 |      |       |
| 6.07662721                           | 4.598376757                                         | 4.920453328 |             |             |      |       |
| ENSG00000254999                      | 2361.574264                                         | 2894.819146 |             | 3136.402471 |      |       |
| 2128.915257                          | 2046.694848                                         | 2332.575978 |             | 2797.598627 |      |       |
| 2169.395361                          | 0.366322152                                         | 0.015067743 |             | 0.093428652 |      | BRK1  |
| 3                                    | 10115592                                            | 10127190    |             | +           | 1233 |       |
| protein_coding                       | "BRICK1, SCAR/WAVE actin nucleating complex subunit |             |             |             |      |       |
| [Source:HGNC Symbol;Acc:HGNC:23057]" | -                                                   |             |             | 2603        | 3271 | 2698  |
| 2055                                 | 1793                                                | 2704        | 103.380773  | 125.702498  |      |       |
| 136.1399903                          | 92.61062034                                         | 89.38498532 |             | 101.9705188 |      |       |
| ENSG00000214530                      | 604.2291433                                         | 653.126423  |             | 813.7441549 |      |       |
| 731.3937574                          | 1350.384833                                         | 959.2546183 |             | 690.3665738 |      |       |
| 1013.677736                          | -0.554463841                                        | 0.015068797 |             | 0.093428652 |      |       |
| STARD10                              | 11                                                  | 72754729    | 72793681    | -           | 3710 |       |
| protein_coding                       | StAR related lipid transfer domain containing 10    |             |             |             |      |       |
| [Source:HGNC Symbol;Acc:HGNC:10666]" | -                                                   |             |             | 666         | 738  | 700   |
| 706                                  | 1183                                                | 1112        | 8.790812218 | 9.425597561 |      |       |
| 11.7389966                           | 10.57408592                                         | 19.60009585 |             | 13.93676239 |      |       |
| ENSG00000141522                      | 6039.569681                                         | 7672.907978 |             | 8175.803774 |      |       |
| 6718.255689                          | 11195.75185                                         | 12489.2881  |             | 7296.093811 |      |       |
| 10134.43188                          | -0.474190947                                        | 0.015094098 |             | 0.093548138 |      |       |
| ARHGDI17                             | 17                                                  | 81867721    | 81871406    | -           | 2903 |       |
| protein_coding                       | Rho GDP dissociation inhibitor alpha [Source:HGNC   |             |             |             |      |       |
| Symbol;Acc:HGNC:678]"                | -                                                   | 6657        | 8670        | 7033        | 6485 | 9808  |
| 14478                                | 112.2949445                                         | 141.5137053 |             | 150.730253  |      |       |
| 124.1294949                          | 207.6733562                                         | 231.8956247 |             |             |      |       |
| ENSG00000136867                      | 7.258007728                                         | 8.849951531 |             | 3.48747495  |      |       |
| 40.4027713                           | 35.38624667                                         | 15.52750281 |             | 6.531811403 |      |       |
| 30.43884026                          | -2.203440175                                        | 0.01510114  |             | 0.093548138 |      |       |
| SLC31A2                              | 9                                                   | 113150942   | 113164137   | +           | 2504 |       |
| protein_coding                       | solute carrier family 31 member 2 [Source:HGNC      |             |             |             |      |       |
| Symbol;Acc:HGNC:11017]"              | -                                                   | 8           | 10          | 3           | 39   | 31    |
| 18                                   | 0.156453162                                         | 0.189230927 |             | 0.074540753 |      |       |
| 0.865450685                          | 0.760982605                                         | 0.334248294 |             |             |      |       |
| ENSG00000138678                      | 55.34230892                                         | 79.64956378 |             | 65.09953239 |      |       |
| 100.488944                           | 130.1300684                                         | 162.1761405 |             | 66.69713503 |      |       |
| 130.9317176                          | -0.973870605                                        | 0.015103934 |             | 0.093548138 |      | GPAT3 |
| 4                                    | 83535914                                            | 83605875    |             | +           | 3468 |       |
| protein_coding                       | glycerol-3-phosphate acyltransferase 3 [Source:HGNC |             |             |             |      |       |
| Symbol;Acc:HGNC:28157]"              | -                                                   | 61          | 90          | 56          | 97   | 114   |

|                         |                                                      |             |             |             |
|-------------------------|------------------------------------------------------|-------------|-------------|-------------|
| 188                     | 0.861349547                                          | 1.229673635 | 1.004652305 |             |
| 1.554192071             | 2.020566381                                          | 2.520633934 |             |             |
| ENSG00000101493         | 246.7722627                                          | 242.488672  | 387.1097194 |             |
| 211.337573              | 113.007691                                           | 182.8794776 | 292.1235514 |             |
| 169.0749138             | 0.785176057                                          | 0.015114612 | 0.09356432  | ZNF516      |
| 18                      | 76358190                                             | 76495190    | - 8217      |             |
| protein_coding          | zinc finger protein 516 [Source:HGNC                 |             |             |             |
| Symbol;Acc:HGNC:28990]  | zf-C2H2                                              | 272 274     | 333 204     | 99          |
| 212                     | 1.621004799                                          | 1.58002412  | 2.521377036 |             |
| 1.379522932             | 0.740575376                                          | 1.199647331 |             |             |
| ENSG00000166477         | 697.6759928                                          | 613.3016411 | 803.2817301 |             |
| 591.5380106             | 455.4552394                                          | 445.1217474 | 704.7531213 |             |
| 497.3716658             | 0.50222915                                           | 0.015117125 | 0.09356432  | LE01        |
| 15                      | 51938025                                             | 51971806    | - 2679      |             |
| protein_coding          | "LE01 homolog, Paf1/RNA polymerase II complex        |             |             |             |
| component [Source:HGNC  | Symbol;Acc:HGNC:30401]"                              | -           | 769         | 693         |
| 691                     | 571 399                                              | 516         | 14.05666548 | 12.25707834 |
| 16.04767722             | 11.84337384                                          | 9.154772203 | 8.955874645 |             |
| ENSG00000159063         | 1454.323298                                          | 1385.017415 | 1503.101703 |             |
| 1319.823863             | 995.3808742                                          | 921.2985004 | 1447.480805 |             |
| 1078.834412             | 0.424256788                                          | 0.015138017 | 0.093660853 | ALG8        |
| 11                      | 78100936                                             | 78139660    | - 3448      |             |
| protein_coding          | "ALG8, alpha-1,3-glucosyltransferase [Source:HGNC    |             |             |             |
| Symbol;Acc:HGNC:23161]" | -                                                    | 1603 1565   | 1293 1274   | 872         |
| 1068                    | 22.76643076                                          | 21.50668754 | 23.33125575 |             |
| 20.53119437             | 15.54520981                                          | 14.40240481 |             |             |
| ENSG00000149600         | 561.5883479                                          | 635.4265199 | 604.4956579 |             |
| 795.6238041             | 904.0615279                                          | 740.1443008 | 600.5035086 |             |
| 813.2765443             | -0.436885725                                         | 0.015159761 | 0.093756227 | COMMD7      |
| 20                      | 32702691                                             | 32743997    | - 2584      |             |
| protein_coding          | COMM domain containing 7 [Source:HGNC                |             |             |             |
| Symbol;Acc:HGNC:16223]  | -                                                    | 619 718     | 520 768     | 792         |
| 858                     | 11.7307782                                           | 13.16613718 | 12.52038492 |             |
| 16.51508276             | 18.83996243                                          | 15.43923568 |             |             |
| ENSG00000164405         | 1321.864657                                          | 2015.133964 | 1976.235805 |             |
| 1308.428209             | 1287.602782                                          | 1329.326769 | 1771.078142 |             |
| 1308.452587             | 0.436386343                                          | 0.015164032 | 0.093756227 | UQCRO       |
| 5                       | 132866560                                            | 132868031   | + 1472      |             |
| protein_coding          | ubiquinol-cytochrome c reductase complex III subunit |             |             |             |
| VII [Source:HGNC        | Symbol;Acc:HGNC:29594]                               | -           | 1457 2277   | 1700        |
| 1263                    | 1128 1541                                            | 48.47082652 | 73.29623409 |             |
| 71.85350503             | 47.67685332                                          | 47.10300884 | 48.67722891 |             |
| ENSG00000089820         | 106.148363                                           | 69.02962194 | 61.61205744 |             |
| 118.1004084             | 134.6960357                                          | 213.9344832 | 78.93001414 |             |
| 155.5769758             | -0.978472107                                         | 0.015213845 | 0.094031343 |             |
| ARHGAP4 X               | 153907367                                            | 153934999   | - 5580      |             |
| protein_coding          | Rho GTPase activating protein 4 [Source:HGNC         |             |             |             |
| Symbol;Acc:HGNC:674]    | -                                                    | 117 78      | 53 114      | 118         |
| 248                     | 1.026786964                                          | 0.662348938 | 0.59094698  |             |
| 1.135226959             | 1.299855777                                          | 2.066562289 |             |             |

|                                     |                                                               |             |                |        |
|-------------------------------------|---------------------------------------------------------------|-------------|----------------|--------|
| ENSG00000177406                     | 15.42326642                                                   | 17.69990306 | 43.01219105    |        |
| 42.47470829                         | 90.17785443                                                   | 80.22543121 | 25.37845351    |        |
| 70.95933131                         | -1.495437194                                                  | 0.015237222 | 0.094142936    |        |
| AC021054.1                          | 12 630891                                                     | 663706 +    | 3530 antisense |        |
|                                     | uncharacterized LOC100049716 [Source:NCBI gene;Acc:100049716] |             |                |        |
| -                                   | 17 20                                                         | 37 41       | 79 93          |        |
| 0.23583209                          | 0.268461326                                                   | 0.652129528 | 0.645388459    |        |
| 1.375624006                         | 1.225008949                                                   |             |                |        |
| ENSG00000165775                     | 1518.738117                                                   | 1693.880723 | 1776.287241    |        |
| 2222.152422                         | 1921.130747                                                   | 2225.608737 | 1662.968694    |        |
| 2122.963968                         | -0.352912599                                                  | 0.015276324 | 0.094351572    | FUNDC2 |
| X                                   | 155025980                                                     | 155060303   | + 10252        |        |
| protein_coding                      | FUN14 domain containing 2 [Source:HGNC                        |             |                |        |
| Symbol;Acc:HGNC:24925]              | -                                                             | 1674 1914   | 1528 2145      | 1683   |
| 2580                                | 7.99605071                                                    | 8.846261573 | 9.273028687    |        |
| 11.62601135                         | 10.0907368                                                    | 11.70151589 |                |        |
| ENSG00000178878                     | 304.8363246                                                   | 290.2784102 | 455.6967268    |        |
| 246.5605018                         | 218.0249392                                                   | 50.03306463 | 350.2704872    |        |
| 171.5395019                         | 1.032304297                                                   | 0.015287281 | 0.094386288    | APOLD1 |
| 12                                  | 12725917                                                      | 12829975    | + 7243         |        |
| protein_coding                      | apolipoprotein L domain containing 1 [Source:HGNC             |             |                |        |
| Symbol;Acc:HGNC:25268]              | -                                                             | 336 328     | 392 238        | 191    |
| 58                                  | 2.271692142                                                   | 2.145763232 | 3.367242765    |        |
| 1.825872785                         | 1.620922468                                                   | 0.372340713 |                |        |
| ENSG00000176022                     | 1910.670534                                                   | 2187.708019 | 2197.109218    |        |
| 2061.577305                         | 2924.502064                                                   | 3648.100522 | 2098.495924    |        |
| 2878.059964                         | -0.456133916                                                  | 0.015306978 | 0.094474922    |        |
| B3GALT6 1                           | 1232226 1235041                                               | + 2816      |                |        |
| protein_coding                      | "beta-1,3-galactosyltransferase 6 [Source:HGNC                |             |                |        |
| Symbol;Acc:HGNC:17978]"             | -                                                             | 2106 2472   | 1890 1990      | 2562   |
| 4229                                | 36.62304073                                                   | 41.59510805 | 41.75764524    |        |
| 39.26742922                         | 55.92343446                                                   | 69.829037   |                |        |
| ENSG00000138443                     | 1315.513901                                                   | 1253.153137 | 1504.264195    |        |
| 1272.169312                         | 877.8072159                                                   | 741.8695789 | 1357.643744    |        |
| 963.9487022                         | 0.494238215                                                   | 0.015332337 | 0.094598432    | ABI2   |
| 2                                   | 203328219                                                     | 203447723   | + 23331        |        |
| protein_coding                      | abl interactor 2 [Source:HGNC Symbol;Acc:HGNC:24011]          |             |                |        |
| -                                   | 1450 1416                                                     | 1294 1228   | 769 860        |        |
| 3.043430104                         | 2.875784513                                                   | 3.450704492 | 2.924671256    |        |
| 2.026004223                         | 1.713941978                                                   |             |                |        |
| ENSG00000104517                     | 3139.088342                                                   | 2431.966681 | 2649.31847     |        |
| 2554.698308                         | 1741.91653                                                    | 1824.481581 | 2740.124498    |        |
| 2040.365473                         | 0.42549249                                                    | 0.015375194 | 0.094829782    | UBR5   |
| 8                                   | 102253012                                                     | 102412841   | - 13085        |        |
| protein_coding                      | ubiquitin protein ligase E3 component n-recognin 5            |             |                |        |
| [Source:HGNC Symbol;Acc:HGNC:16806] | -                                                             | 3460 2748   | 2279           |        |
| 2466                                | 1526 2115                                                     | 12.94884569 | 9.951062232    |        |
| 10.8362108                          | 10.47204233                                                   | 7.168497974 | 7.51566931     |        |
| ENSG00000044090                     | 1777.304642                                                   | 1885.039676 | 1992.510688    |        |
| 2191.073367                         | 2651.685517                                                   | 2338.614452 | 1884.951669    |        |



|                                                         |                                                  |             |                |                       |
|---------------------------------------------------------|--------------------------------------------------|-------------|----------------|-----------------------|
| 2393.791112                                             | -0.344810927                                     | 0.015398469 | 0.094940228    | CUL7                  |
| 6                                                       | 43037617                                         | 43053945    | - 5628         |                       |
| protein_coding                                          | cullin 7 [Source:HGNC Symbol;Acc:HGNC:21024]     |             |                | -                     |
| 1959                                                    | 2130                                             | 1714        | 2115 2323 2711 | 17.04547197           |
|                                                         | 17.932959                                        | 18.9480087  | 20.88181898    | 25.37128602           |
|                                                         | 22.39785594                                      |             |                |                       |
| ENSG00000184990                                         | 1113.196935                                      | 1748.750423 | 1504.264195    |                       |
| 848.4581973                                             | 1006.795792                                      | 1247.376059 | 1455.403851    |                       |
| 1034.210016                                             | 0.492244296                                      | 0.015412426 | 0.094993174    | SIVA1                 |
| 14                                                      | 104753100                                        | 104768494   | + 4776         |                       |
| protein_coding                                          | SIVA1 apoptosis inducing factor [Source:HGNC     |             |                |                       |
| Symbol;Acc:HGNC:17712]                                  | -                                                | 1227 1976   | 1294 819       | 882                   |
|                                                         | 1446                                             | 12.5808194  | 19.60419722    | 16.85686485           |
| 9.528655535                                             | 11.35145749                                      | 14.07780655 |                |                       |
| ENSG00000119401                                         | 455.4399849                                      | 499.1372664 | 497.5464262    |                       |
| 645.4083723                                             | 780.7804105                                      | 593.4956631 | 484.0412258    |                       |
| 673.2281486                                             | -0.47521874                                      | 0.015436723 | 0.095109787    | TRIM32                |
| 9                                                       | 116687302                                        | 116701300   | + 3780         |                       |
| protein_coding                                          | tripartite motif containing 32 [Source:HGNC      |             |                |                       |
| Symbol;Acc:HGNC:16380]                                  | -                                                | 502 564     | 428 623        | 684                   |
|                                                         | 688                                              | 6.503402009 | 7.069907716    | 7.044640185           |
| 9.158161344                                             | 11.12273684                                      | 8.463064612 |                |                       |
| ENSG00000160075                                         | 3650.777887                                      | 3901.94363  | 3714.160821    |                       |
| 4043.385036                                             | 4932.38619                                       | 5225.004697 | 3755.627446    |                       |
| 4733.591974                                             | -0.333948203                                     | 0.015446951 | 0.095139666    | SSU72                 |
| 1                                                       | 1541673                                          | 1574869     | - 6925         | protein_coding "SSU72 |
| homolog, RNA polymerase II CTD phosphatase [Source:HGNC |                                                  |             |                |                       |
| Symbol;Acc:HGNC:25016]"                                 | -                                                | 4024 4409   | 3195 3903      | 4321                  |
|                                                         | 6057                                             | 28.45554303 | 30.16801685    | 28.70502513           |
| 31.31776905                                             | 38.35410464                                      | 40.66949821 |                |                       |
| ENSG00000167615                                         | 1490.613337                                      | 1703.61567  | 1160.166667    |                       |
| 1044.256243                                             | 1147.199287                                      | 1053.282274 | 1451.465224    |                       |
| 1081.579268                                             | 0.425408343                                      | 0.015547339 | 0.095724633    | LENG8                 |
| 19                                                      | 54448887                                         | 54462037    | + 6469         |                       |
| protein_coding                                          | leukocyte receptor cluster member 8 [Source:HGNC |             |                |                       |
| Symbol;Acc:HGNC:15500]                                  | -                                                | 1643 1925   | 998 1008       | 1005                  |
|                                                         | 1221                                             | 12.43738551 | 14.10002957    | 9.598430768           |
| 8.658355724                                             | 9.549404081                                      | 8.776261011 |                |                       |
| ENSG00000140829                                         | 2580.221747                                      | 2863.844315 | 3031.778223    |                       |
| 3380.365199                                             | 3369.683877                                      | 3904.304319 | 2825.281429    |                       |
| 3551.451132                                             | -0.33047384                                      | 0.015555094 | 0.095739059    | DHX38                 |
| 16                                                      | 72093562                                         | 72112912    | + 6361         |                       |
| protein_coding                                          | DEAH-box helicase 38 [Source:HGNC                |             |                |                       |
| Symbol;Acc:HGNC:17211]                                  | -                                                | 2844 3236   | 2608 3263      | 2952                  |
|                                                         | 4526                                             | 21.89439152 | 24.10513445    | 25.50874181           |
| 28.50386299                                             | 28.52583184                                      | 33.08416455 |                |                       |
| ENSG00000238178                                         | 9.07250966                                       | 20.35488852 | 0 0 0          |                       |
| 0                                                       | 9.809132727                                      | 0           | 5.731592795    | 0.015574873           |
|                                                         | 0.095827452                                      | AC078993.1  | X              | 16152941              |
| 16170869                                                | -                                                | 1219        | antisense      | "novel transcript,    |

|                                                  |                                                |             |             |             |                |        |
|--------------------------------------------------|------------------------------------------------|-------------|-------------|-------------|----------------|--------|
| antisense to MAGEB17"                            | -                                              | 10          | 23          | 0           | 0              | 0      |
| 0                                                | 0.40172141                                     | 0.894026869 | 0           | 0           | 0              | 0      |
| 0                                                |                                                |             |             |             |                |        |
| ENSG00000237758                                  | 5.443505796                                    | 18.58489822 | 12.78740815 | 0           |                |        |
| 1.141491828                                      | 0.862639045                                    | 12.27193739 | 0.668043624 |             |                |        |
| 4.203056335                                      | 0.015589981                                    | 0.095887056 | BANF1P3     | 2           |                |        |
| 230725143                                        | 230725403                                      | -           | 261         |             |                |        |
| processed_pseudogene                             | barrier to autointegration factor 1            | pseudogene  |             |             |                |        |
| 3 [Source:HGNC Symbol;Acc:HGNC:43883]            | -                                              | 6           | 21          | 11          |                |        |
| 0                                                | 1                                              | 1           | 1.125743444 | 3.812459407 |                |        |
| 2.622159012                                      | 0                                              | 0.235508645 | 0.178151921 |             |                |        |
| ENSG00000107821                                  | 143.3456526                                    | 183.1939967 | 147.6364395 |             |                |        |
| 74.58973163                                      | 115.2906746                                    | 62.97265031 | 158.0586963 |             |                |        |
| 84.28435219                                      | 0.912231069                                    | 0.015614542 | 0.096004741 |             |                |        |
| KAZALD1                                          | 10                                             | 101061841   | 101068131   | +           | 3613           |        |
| protein_coding                                   | Kazal type serine peptidase inhibitor domain 1 |             |             |             |                |        |
| [Source:HGNC Symbol;Acc:HGNC:25460]              | -                                              | 158         | 207         | 127         |                |        |
| 72                                               | 101                                            | 73          | 2.14149867  | 2.714743642 |                |        |
| 2.186968894                                      | 1.107328757                                    | 1.718307052 | 0.93947649  |             |                |        |
| ENSG00000155962                                  | 80.74533597                                    | 64.60464618 | 89.51185704 |             |                |        |
| 208.2296675                                      | 92.46083808                                    | 161.3135015 | 78.28727973 |             |                |        |
| 154.0013357                                      | -0.979485655                                   | 0.015643276 | 0.096147989 |             |                | CLIC2  |
| X                                                | 155276211                                      | 155334657   | -           | 2840        |                |        |
| protein_coding                                   | chloride intracellular channel 2 [Source:HGNC  |             |             |             |                |        |
| Symbol;Acc:HGNC:2063]                            | -                                              | 89          | 73          | 77          | 201            | 81     |
| 187                                              | 1.53461822                                     | 1.21795421  | 1.686860744 |             |                |        |
| 3.932690427                                      | 1.753129667                                    | 3.061641137 |             |             |                |        |
| ENSG00000162062                                  | 599.6928885                                    | 795.6106427 | 623.0955243 |             |                |        |
| 494.1569721                                      | 413.2200418                                    | 521.0339833 | 672.7996852 |             |                |        |
| 476.1369991                                      | 0.498352702                                    | 0.015705404 | 0.096496317 |             |                | TEDC2  |
| 16                                               | 2460080                                        | 2464963     | +           | 2854        | protein_coding |        |
| tubulin epsilon and delta complex 2 [Source:HGNC |                                                |             |             |             |                |        |
| Symbol;Acc:HGNC:25849]                           | -                                              | 661         | 899         | 536         | 477            | 362    |
| 604                                              | 11.34164826                                    | 14.92561255 | 11.68470272 |             |                |        |
| 9.287021563                                      | 7.796540908                                    | 9.840427998 |             |             |                |        |
| ENSG00000134668                                  | 551.6085873                                    | 674.3663067 | 580.0833333 |             |                |        |
| 745.8973163                                      | 819.5911326                                    | 887.6555776 | 602.0194091 |             |                |        |
| 817.7146755                                      | -0.441756296                                   | 0.015717667 | 0.096508642 |             |                | SPOCD1 |
| 1                                                | 31790422                                       | 31816051    | -           | 7085        |                |        |
| protein_coding                                   | SPOC domain containing 1 [Source:HGNC          |             |             |             |                |        |
| Symbol;Acc:HGNC:26338]                           | -                                              | 608         | 762         | 499         | 720            | 718    |
| 1029                                             | 4.202351816                                    | 5.096142432 | 4.38195121  |             |                |        |
| 5.646829638                                      | 6.229195337                                    | 6.753152208 |             |             |                |        |
| ENSG00000186501                                  | 1207.551036                                    | 1708.925641 | 1325.240481 |             |                |        |
| 1473.1472                                        | 2047.83634                                     | 2377.433209 | 1413.905719 |             |                |        |
| 1966.138916                                      | -0.475709946                                   | 0.015718322 | 0.096508642 |             |                |        |
| TMEM222                                          | 1                                              | 27322145    | 27336400    | +           | 4476           |        |
| protein_coding                                   | transmembrane protein 222 [Source:HGNC         |             |             |             |                |        |
| Symbol;Acc:HGNC:25363]                           | -                                              | 1331        | 1931        | 1140        | 1422           | 1794   |
| 2756                                             | 14.56185362                                    | 20.44177655 | 15.84607182 |             |                |        |

|                         |                                                  |             |             |             |  |  |
|-------------------------|--------------------------------------------------|-------------|-------------|-------------|--|--|
| 17.65312361             | 24.63654036                                      | 28.62992125 |             |             |  |  |
| ENSG00000164062         | 2715.402141                                      | 2905.439088 | 2663.26837  |             |  |  |
| 2263.591161             | 2350.331674                                      | 1970.267579 | 2761.369866 |             |  |  |
| 2194.730138             | 0.3318766                                        | 0.015741206 | 0.096584369 | APEH        |  |  |
| 3                       | 49674002                                         | 49683963    | + 4669      |             |  |  |
| protein_coding          | acylaminoacyl-peptide hydrolase [Source:HGNC     |             |             |             |  |  |
| Symbol;Acc:HGNC:586]    | -                                                | 2993 3283   | 2291 2185   | 2059        |  |  |
| 2284                    | 31.39146083                                      | 33.31758003 | 30.52868247 |             |  |  |
| 26.00396729             | 27.10689871                                      | 22.7459062  |             |             |  |  |
| ENSG00000147082         | 17.23776835                                      | 29.20484005 | 16.2748831  |             |  |  |
| 50.76245625             | 45.65967313                                      | 79.36279217 | 20.9058305  |             |  |  |
| 58.59497385             | -1.484418733                                     | 0.015741576 | 0.096584369 | CCNB3       |  |  |
| X                       | 50202713                                         | 50351910    | + 5408      |             |  |  |
| protein_coding          | cyclin B3 [Source:HGNC Symbol;Acc:HGNC:18709]    |             |             | -           |  |  |
| 19                      | 33 14                                            | 49 40       | 92          | 0.172046405 |  |  |
|                         | 0.289137018                                      | 0.161063896 | 0.5034675   | 0.454643167 |  |  |
|                         | 0.791010344                                      |             |             |             |  |  |
| ENSG00000116337         | 2853.304288                                      | 3242.622241 | 3501.424849 |             |  |  |
| 3396.940695             | 4649.296216                                      | 4377.030516 | 3199.117126 |             |  |  |
| 4141.089142             | -0.372523997                                     | 0.015756707 | 0.096643687 | AMPD2       |  |  |
| 1                       | 109616104                                        | 109632051   | + 6823      |             |  |  |
| protein_coding          | adenosine monophosphate deaminase 2 [Source:HGNC |             |             |             |  |  |
| Symbol;Acc:HGNC:469]    | -                                                | 3145 3664   | 3012 3279   | 4073        |  |  |
| 5074                    | 22.57220376                                      | 25.44523901 | 27.46543254 |             |  |  |
| 26.70410882             | 36.69326852                                      | 34.57849681 |             |             |  |  |
| ENSG00000148300         | 1075.999646                                      | 1428.382177 | 1109.017034 |             |  |  |
| 1148.889061             | 1779.58576                                       | 2320.499032 | 1204.466286 |             |  |  |
| 1749.657951             | -0.538830702                                     | 0.015777734 | 0.096739003 | REX04       |  |  |
| 9                       | 133406059                                        | 133418096   | - 2654      |             |  |  |
| protein_coding          | "REX4 homolog, 3'-5' exonuclease [Source:HGNC    |             |             |             |  |  |
| Symbol;Acc:HGNC:12820]" | -                                                | 1186 1614   | 954 1109    | 1559        |  |  |
| 2690                    | 21.88328185                                      | 28.81569195 | 22.36424817 |             |  |  |
| 23.21895508             | 36.10709568                                      | 47.12836569 |             |             |  |  |
| ENSG00000106052         | 4502.686544                                      | 3576.265414 | 4069.883266 |             |  |  |
| 3680.796062             | 2881.125374                                      | 2851.022045 | 4049.611741 |             |  |  |
| 3137.647827             | 0.36813875                                       | 0.015783185 | 0.096739003 |             |  |  |
| TAX1BP1 7               | 27739331                                         | 27844564    | + 9165      |             |  |  |
| protein_coding          | Tax1 binding protein 1 [Source:HGNC              |             |             |             |  |  |
| Symbol;Acc:HGNC:11575]  | -                                                | 4963 4041   | 3501 3553   | 2524        |  |  |
| 3305                    | 26.5179831                                       | 20.89213493 | 23.76656887 |             |  |  |
| 21.54144249             | 16.92794508                                      | 16.76756554 |             |             |  |  |
| ENSG00000167778         | 596.0638846                                      | 644.2764715 | 714.9323647 |             |  |  |
| 753.1490958             | 860.6848384                                      | 1099.002144 | 651.7575736 |             |  |  |
| 904.2786926             | -0.473908299                                     | 0.015791697 | 0.09675765  | SPRYD3      |  |  |
| 12                      | 53064316                                         | 53079420    | - 3479      |             |  |  |
| protein_coding          | SPRY domain containing 3 [Source:HGNC            |             |             |             |  |  |
| Symbol;Acc:HGNC:25920]  | -                                                | 657 728     | 615 727     | 754         |  |  |
| 1274                    | 9.247825458                                      | 9.915243666 | 10.99834994 |             |  |  |
| 11.61159891             | 13.32184196                                      | 17.027309   |             |             |  |  |
| ENSG00000268916         | 95.26135143                                      | 150.449176  | 77.88694054 |             |  |  |

|                                                               |                                                       |             |                    |        |
|---------------------------------------------------------------|-------------------------------------------------------|-------------|--------------------|--------|
| 175.0786756                                                   | 265.967596                                            | 161.3135015 | 107.8658227        |        |
| 200.786591                                                    | -0.891214573                                          | 0.015798515 | 0.096765905        | CSAG3  |
| X                                                             | 152753921                                             | 152760222   | + 1083             |        |
| protein_coding                                                | CSAG family member 3 [Source:HGNC                     |             |                    |        |
| Symbol;Acc:HGNC:26237]                                        | -                                                     | 105 170     | 67 169             | 233    |
| 187                                                           | 4.747768405                                           | 7.437841264 | 3.849046809        |        |
| 8.67102207                                                    | 13.22436491                                           | 8.028680361 |                    |        |
| ENSG00000138468                                               | 413.7064405                                           | 315.9432697 | 413.8470274        |        |
| 336.6897608                                                   | 157.5258723                                           | 194.0937852 | 381.1655792        |        |
| 229.4364728                                                   | 0.731645441                                           | 0.015805333 | 0.096774156        | SENP7  |
| 3                                                             | 101324205                                             | 101513241   | - 6396             |        |
| protein_coding                                                | SUMO specific peptidase 7 [Source:HGNC                |             |                    |        |
| Symbol;Acc:HGNC:30402]                                        | -                                                     | 456 357     | 356 325            | 138    |
| 225                                                           | 3.49128314                                            | 2.644759598 | 3.462967291        |        |
| 2.823494522                                                   | 1.326227386                                           | 1.635705376 |                    |        |
| ENSG00000105875                                               | 347.47712                                             | 311.5182939 | 340.6100534        |        |
| 215.4814469                                                   | 256.8356613                                           | 182.8794776 | 333.2018224        |        |
| 218.398862                                                    | 0.611397911                                           | 0.015851144 | 0.097021068        | WDR91  |
| 7                                                             | 135183839                                             | 135211534   | - 6032             |        |
| protein_coding                                                | WD repeat domain 91 [Source:HGNC                      |             |                    |        |
| Symbol;Acc:HGNC:24997]                                        | -                                                     | 383 352     | 293 208            | 225    |
| 212                                                           | 3.109325042                                           | 2.765080449 | 3.022129945        |        |
| 1.9160818                                                     | 2.292812525                                           | 1.63420128  |                    |        |
| ENSG00000156110                                               | 759.3690585                                           | 742.5109335 | 968.3555444        |        |
| 716.8901985                                                   | 555.9065203                                           | 438.220635  | 823.4118455        |        |
| 570.3391179                                                   | 0.52990656                                            | 0.015864755 | 0.097048439        | ADK    |
| 10                                                            | 74151185                                              | 74709303    | + 3184             |        |
| protein_coding                                                | adenosine kinase [Source:HGNC Symbol;Acc:HGNC:257]    |             |                    |        |
| -                                                             | 837 839                                               | 833 692     | 487 508            |        |
| 12.87303893                                                   | 12.48577035                                           | 16.27716586 | 12.07661104        |        |
| 9.401632311                                                   | 7.418595151                                           |             |                    |        |
| ENSG00000071054                                               | 7194.50016                                            | 6536.574201 | 7608.507849        |        |
| 5946.459161                                                   | 6009.954475                                           | 5355.263193 | 7113.19407         |        |
| 5770.558943                                                   | 0.301793336                                           | 0.015866589 | 0.097048439        | MAP4K4 |
| 2                                                             | 101696850                                             | 101894689   | + 11961            |        |
| protein_coding                                                | mitogen-activated protein kinase kinase kinase kinase |             |                    |        |
| 4 [Source:HGNC Symbol;Acc:HGNC:6866]                          | -                                                     | 7930 7386   | 6545               |        |
| 5740                                                          | 5265 6208                                             | 32.46641835 | 29.25959118        |        |
| 34.04466046                                                   | 26.66591225                                           | 27.05691301 | 24.133218          |        |
| ENSG00000116017                                               | 160.583421                                            | 145.1392051 | 195.2985972        |        |
| 72.51779464                                                   | 39.95221399                                           | 129.3958568 | 167.0070744        |        |
| 80.62195514                                                   | 1.042858003                                           | 0.015915099 | 0.097311507        | ARID3A |
| 19                                                            | 925781 975934                                         | + 7210      | protein_coding AT- |        |
| rich interaction domain 3A [Source:HGNC Symbol;Acc:HGNC:3031] |                                                       |             | ARID               |        |
| 177                                                           | 164 168                                               | 70 35       | 150 1.202172212    |        |
| 1.07779217                                                    | 1.449709095                                           | 0.539479342 | 0.298387166        |        |
| 0.967357521                                                   |                                                       |             |                    |        |
| ENSG00000155760                                               | 520.7620545                                           | 345.1481097 | 399.8971276        |        |
| 284.8913361                                                   | 236.2888084                                           | 311.4126953 | 421.9357639        |        |
| 277.5309466                                                   | 0.603216087                                           | 0.015925157 | 0.097339357        | FZD7   |

|                        |                                                             |                        |                                    |                |        |  |
|------------------------|-------------------------------------------------------------|------------------------|------------------------------------|----------------|--------|--|
| 2                      | 202034587                                                   | 202038445              | +                                  | 3859           |        |  |
| protein_coding         | frizzled class receptor 7 [Source:HGNC                      |                        |                                    |                |        |  |
| Symbol;Acc:HGNC:4045]  | -                                                           | 574 390                | 344                                | 275            | 207    |  |
| 361                    | 7.283930568                                                 | 4.788684991            | 5.546135944                        |                |        |  |
| 3.959769981            | 3.297182052                                                 | 4.349741433            |                                    |                |        |  |
| ENSG00000152778        | 412.7991895                                                 | 438.0726008            | 391.759686                         |                |        |  |
| 482.7613186            | 772.7899677                                                 | 558.1274623            | 414.2104921                        |                |        |  |
| 604.5595829            | -0.544118415                                                | 0.015935457            | 0.097348049                        |                | IFIT5  |  |
| 10                     | 89414586                                                    | 89421001               | +                                  | 4015           |        |  |
| protein_coding         | interferon induced protein with tetratricopeptide           |                        |                                    |                |        |  |
| repeats 5 [Source:HGNC | Symbol;Acc:HGNC:13328]                                      | -                      | 455                                | 495            |        |  |
| 337                    | 466 677                                                     | 647                    | 5.549508624                        | 5.841792007    |        |  |
| 5.222172313            | 6.449297496                                                 | 10.36455068            | 7.492896767                        |                |        |  |
| ENSG00000106133        | 13.60876449                                                 | 7.079961225            | 3.48747495                         | 0              |        |  |
| 0                      | 0                                                           | 8.058733555            | 0                                  | 5.446706705    |        |  |
| 0.015937585            | 0.097348049                                                 | NSUN5P2 7              | 72947581                           |                |        |  |
| 72954790               | -                                                           | 2576                   | transcribed_unprocessed_pseudogene |                |        |  |
|                        | NOP2/Sun RNA methyltransferase family member 5 pseudogene 2 |                        |                                    |                |        |  |
| [Source:HGNC           | Symbol;Acc:HGNC:16609]                                      | -                      | 15                                 | 8              | 3      |  |
| 0                      | 0                                                           | 0                      | 0.285150465                        | 0.147153491    |        |  |
| 0.072457316            | 0                                                           | 0                      | 0                                  |                |        |  |
| ENSG00000119844        | 580.6406182                                                 | 557.5469465            | 478.9465598                        |                |        |  |
| 666.1277422            | 776.2144432                                                 | 769.4740284            | 539.0447081                        |                |        |  |
| 737.2720713            | -0.450830439                                                | 0.015949192            | 0.097385315                        |                | AFTPH  |  |
| 2                      | 64524305                                                    | 64593005               | +                                  | 5767           |        |  |
| protein_coding         | aftiphilin [Source:HGNC                                     | Symbol;Acc:HGNC:25951] | -                                  |                |        |  |
| 640                    | 630 412                                                     | 643 680                | 892                                | 5.434488901    |        |  |
| 5.176271398            | 4.444819314                                                 | 6.195452978            | 7.247802017                        |                |        |  |
| 7.191937773            |                                                             |                        |                                    |                |        |  |
| ENSG00000067836        | 117.0353746                                                 | 146.0242003            | 97.64929859                        |                |        |  |
| 72.51779464            | 62.78205055                                                 | 44.85723035            | 120.2362912                        |                |        |  |
| 60.05235852            | 1.006345175                                                 | 0.015998749            | 0.097654198                        |                | ROGDI  |  |
| 16                     | 4796968                                                     | 4802950 -              | 3683                               | protein_coding | rogdi  |  |
| homolog [Source:HGNC   | Symbol;Acc:HGNC:29478]                                      | -                      | 129                                | 165            |        |  |
| 84                     | 70 55                                                       | 52                     | 1.715207531                        | 2.122797982    |        |  |
| 1.419006595            | 1.056108079                                                 | 0.917927394            | 0.656496844                        |                |        |  |
| ENSG00000100985        | 185.986448                                                  | 469.0474312            | 699.8199732                        |                |        |  |
| 33.15099184            | 211.1759882                                                 | 62.97265031            | 451.6179508                        |                |        |  |
| 102.4332101            | 2.141616311                                                 | 0.01600998             | 0.097689046                        |                | MMP9   |  |
| 20                     | 46008908                                                    | 46016561               | +                                  | 2336           |        |  |
| protein_coding         | matrix metalloproteinase 9 [Source:HGNC                     |                        |                                    |                |        |  |
| Symbol;Acc:HGNC:7176]  | -                                                           | 205 530                | 602                                | 32             | 185    |  |
| 73                     | 4.297438855                                                 | 10.75052001            | 16.03357987                        |                |        |  |
| 0.761183181            | 4.867951584                                                 | 1.453051609            |                                    |                |        |  |
| ENSG00000159259        | 1143.136217                                                 | 1145.183728            | 1289.20324                         |                |        |  |
| 1052.543991            | 819.5911326                                                 | 805.7048683            | 1192.507728                        |                |        |  |
| 892.6133306            | 0.41769597                                                  | 0.016029837            | 0.097776476                        |                | CHAF1B |  |
| 21                     | 36385378                                                    | 36419015               | +                                  | 5118           |        |  |
| protein_coding         | chromatin assembly factor 1 subunit B [Source:HGNC          |                        |                                    |                |        |  |
| Symbol;Acc:HGNC:1911]  | -                                                           | 1260 1294              | 1109                               | 1016           | 718    |  |

|                        |                                                       |             |             |                |
|------------------------|-------------------------------------------------------|-------------|-------------|----------------|
| 934                    | 12.05588085                                           | 11.98009979 | 13.48149675 |                |
| 11.03076087            | 8.623260837                                           | 8.485503419 |             |                |
| ENSG00000076928        | 3988.275246                                           | 5048.897349 | 4216.357214 |                |
| 4922.922288            | 6159.489905                                           | 5788.307994 | 4417.84327  |                |
| 5623.573395            | -0.348009978                                          | 0.016064084 | 0.097951597 |                |
| ARHGEF1                | 19                                                    | 41883161    | 41930150    | + 8636         |
| protein_coding         | Rho guanine nucleotide exchange factor 1 [Source:HGNC |             |             |                |
| Symbol;Acc:HGNC:681]   | -                                                     | 4396        | 5705        | 3627 4752 5396 |
| 6710                   | 24.92721351                                           | 31.30181036 | 26.13014192 |                |
| 30.57566011            | 38.40667121                                           | 36.12774914 |             |                |
| ENSG00000173875        | 528.9273132                                           | 523.0321355 | 513.8213093 |                |
| 852.6020713            | 538.7841429                                           | 853.1500158 | 521.9269193 |                |
| 748.1787433            | -0.520459701                                          | 0.016125998 | 0.098295238 | ZNF791         |
| 19                     | 12610918                                              | 12633840    | + 6642      |                |
| protein_coding         | zinc finger protein 791 [Source:HGNC                  |             |             |                |
| Symbol;Acc:HGNC:26895] | zf-C2H2                                               | 583         | 591         | 442 823 472    |
| 989                    | 4.298316263                                           | 4.216140261 | 4.140285072 |                |
| 6.88514368             | 4.368079033                                           | 6.923543712 |             |                |
| ENSG00000118939        | 106.148363                                            | 91.15450077 | 148.7989312 |                |
| 36.25889732            | 62.78205055                                           | 65.56056744 | 115.367265  |                |
| 54.86717177            | 1.068686145                                           | 0.016168232 | 0.098512281 | UCHL3          |
| 13                     | 75549480                                              | 75606020    | + 1905      |                |
| protein_coding         | ubiquitin C-terminal hydrolase L3 [Source:HGNC        |             |             |                |
| Symbol;Acc:HGNC:12515] | -                                                     | 117         | 103         | 128 35 55      |
| 76                     | 3.007596462                                           | 2.561938414 | 4.180438476 |                |
| 1.020904476            | 1.774659628                                           | 1.855024417 |             |                |
| ENSG00000100028        | 2299.881199                                           | 2749.679941 | 2694.655644 |                |
| 2176.569808            | 1949.668043                                           | 1996.146751 | 2581.405595 |                |
| 2040.794867            | 0.338884191                                           | 0.016172744 | 0.098512281 | SNRPD3         |
| 22                     | 24555503                                              | 24609980    | + 2544      |                |
| protein_coding         | small nuclear ribonucleoprotein D3 polypeptide        |             |             |                |
| [Source:HGNC           | Symbol;Acc:HGNC:11160]                                | -           | 2535        | 3107 2318      |
| 2101                   | 1708                                                  | 2314        | 48.79659747 | 57.86961421    |
| 56.6895711             | 45.89030975                                           | 41.26844639 | 42.29385439 |                |
| ENSG00000074964        | 610.5799001                                           | 399.1328141 | 626.5829993 |                |
| 365.6968787            | 337.8815811                                           | 401.1271561 | 545.4319045 |                |
| 368.2352053            | 0.565002391                                           | 0.016187636 | 0.09856905  |                |
| ARHGEF10L              | 1                                                     | 17539835    | 17697874    | + 7817         |
| protein_coding         | Rho guanine nucleotide exchange factor 10 like        |             |             |                |
| [Source:HGNC           | Symbol;Acc:HGNC:25540]                                | -           | 673         | 451 539        |
| 353                    | 296                                                   | 465         | 4.21602945  | 2.733775649    |
| 4.289982295            | 2.509265625                                           | 2.327549679 | 2.765947032 |                |
| ENSG00000152926        | 406.4484328                                           | 291.1634054 | 201.1110554 |                |
| 480.6893816            | 461.1626986                                           | 461.5118892 | 299.5742979 |                |
| 467.7879898            | -0.640361108                                          | 0.016198194 | 0.098599399 | ZNF117         |
| 7                      | 64971776                                              | 65006684    | - 10691     |                |
| protein_coding         | zinc finger protein 117 [Source:HGNC                  |             |             |                |
| Symbol;Acc:HGNC:12897] | zf-C2H2                                               | 448         | 329         | 173 464 404    |
| 535                    | 2.052052029                                           | 1.458156067 | 1.006780094 |                |
| 2.411635647            | 2.322792397                                           | 2.32683973  |             |                |

|                        |                                                  |                                  |             |             |             |
|------------------------|--------------------------------------------------|----------------------------------|-------------|-------------|-------------|
| ENSG00000229915        | 0.907250966                                      | 3.539980612                      | 2.3249833   |             |             |
| 13.46759043            | 33.10326302                                      | 8.626390453                      | 2.257404959 |             |             |
| 18.3990813             | -3.02104752                                      | 0.016204108                      | 0.09860147  |             |             |
| AC016999.1             | 2                                                | 238427077                        | 238427729   | -           | 452         |
| antisense              |                                                  | novel transcript                 |             | -           | 1           |
| 2                      | 13                                               | 29                               | 10          | 0.108340354 | 0.419322337 |
|                        | 0.275295053                                      | 1.598147873                      | 3.943727722 |             | 1.028709104 |
| ENSG00000178425        | 753.0183018                                      | 633.6565296                      | 704.4699398 |             |             |
| 617.437223             | 463.4456822                                      | 320.9017248                      | 697.0482571 |             |             |
| 467.2615433            | 0.578265601                                      | 0.01624087                       | 0.098744084 |             | NT5DC1      |
| 6                      | 116100849                                        | 116249497                        | +           | 7309        |             |
| protein_coding         | 5'-nucleotidase domain containing 1 [Source:HGNC |                                  |             |             |             |
| Symbol;Acc:HGNC:21556] | -                                                | 830                              | 716         | 606         | 596         |
| 372                    | 5.560947744                                      | 4.641747383                      | 5.158477123 |             | 406         |
| 4.531065513            | 3.41440813                                       | 2.366551698                      |             |             |             |
| ENSG00000253683        | 66.22932052                                      | 113.2793796                      | 94.16182364 |             |             |
| 44.54664528            | 20.54685291                                      | 50.03306463                      | 91.22350792 |             |             |
| 38.37552094            | 1.242830747                                      | 0.016241953                      | 0.098744084 |             |             |
| AC027309.2             | 5                                                | 172656522                        | 172656713   | -           | 192         |
| processed_pseudogene   |                                                  | coiled-coil domain containing 72 |             |             |             |
| (CCDC72) pseudogene    | -                                                | 73                               | 128         | 81          | 43          |
| 58                     | 18.61874119                                      | 31.58894937                      | 26.24766272 |             | 18          |
| 12.44455211            | 5.762602146                                      | 14.04616556                      |             |             |             |
| ENSG00000122550        | 698.5832438                                      | 608.8766653                      | 657.9702738 |             |             |
| 818.415111             | 986.2489395                                      | 835.0345958                      | 655.1433943 |             |             |
| 879.8995488            | -0.425088161                                     | 0.016244292                      | 0.098744084 |             | KLHL7       |
| 7                      | 23105758                                         | 23177914                         | +           | 7066        |             |
| protein_coding         | kelch like family member 7 [Source:HGNC          |                                  |             |             |             |
| Symbol;Acc:HGNC:15646] | -                                                | 770                              | 688         | 566         | 790         |
| 968                    | 5.336368054                                      | 4.61361389                       | 4.983674217 |             | 864         |
| 6.212487127            | 7.516012082                                      | 6.369901875                      |             |             |             |
| ENSG00000179277        | 48.99155216                                      | 15.92991276                      | 29.06229125 |             |             |
| 4.14387398             | 11.41491828                                      | 0                                | 31.32791872 | 5.186264087 |             |
|                        | 2.625287821                                      | 0.016284158                      | 0.098924263 | MEIS3P1     | 17          |
|                        | 15786618                                         | 15787575                         | +           | 958         |             |
| processed_pseudogene   | Meis homeobox 3 pseudogene 1 [Source:HGNC        |                                  |             |             |             |
| Symbol;Acc:HGNC:7002]  | -                                                | 54                               | 18          | 25          | 4           |
| 0                      | 2.760304124                                      | 0.89029398                       | 1.623608612 |             | 10          |
| 0.232009905            | 0.641625848                                      | 0                                |             |             |             |
| ENSG00000267152        | 47.17705023                                      | 32.74482067                      | 24.41232465 |             |             |
| 61.1221412             | 106.15874                                        | 81.08807026                      | 34.77806518 |             |             |
| 82.78965049            | -1.245210638                                     | 0.016285118                      | 0.098924263 |             |             |
| AC093227.1             | 19                                               | 37728586                         | 37730643    | -           | 1360        |
| lincRNA                | novel transcript                                 |                                  |             | -           | 52          |
| 59                     | 93                                               | 94                               | 1.872376229 | 1.28910786  | 37          |
| 0.960698766            | 2.410599971                                      | 4.2033098                        | 3.213808265 |             | 21          |
| ENSG00000139679        | 22.68127415                                      | 42.47976735                      | 8.137441549 |             |             |
| 87.02135357            | 67.34801786                                      | 58.65945508                      | 24.43282768 |             |             |
| 71.00960884            | -1.526770038                                     | 0.016301564                      | 0.098932971 |             | LPAR6       |
| 13                     | 48389567                                         | 48444704                         | -           | 4348        |             |

|                                      |                                             |              |                |                  |      |       |
|--------------------------------------|---------------------------------------------|--------------|----------------|------------------|------|-------|
| protein_coding                       | lysophosphatidic acid receptor 6            | [Source:HGNC |                |                  |      |       |
| Symbol;Acc:HGNC:15520]               | -                                           | 25           | 48             | 7                | 84   | 59    |
| 68                                   | 0.281565316                                 | 0.523092078  | 0.100164851    |                  |      |       |
| 1.073499371                          | 0.834084089                                 | 0.727194182  |                |                  |      |       |
| ENSG00000165689                      | 1530.53238                                  | 1821.320025  | 1312.453073    |                  |      |       |
| 1727.995449                          | 2132.306735                                 | 2386.059599  | 1554.768492    |                  |      |       |
| 2082.120595                          | -0.420987608                                | 0.016302605  | 0.098932971    |                  |      | ENTR1 |
| 9                                    | 136401922                                   | 136410609    | -              | 3133             |      |       |
| protein_coding                       | endosome associated trafficking regulator 1 | [Source:HGNC |                |                  |      |       |
| Symbol;Acc:HGNC:10667]               | -                                           | 1687         | 2058           |                  |      | 1129  |
| 1668                                 | 1868                                        | 2766         | 26.36837529    | 31.12514737      |      |       |
| 22.42024704                          | 29.58337339                                 | 36.64914415  | 41.05091096    |                  |      |       |
| ENSG00000265972                      | 1242.026572                                 | 1845.214894  | 2324.9833      |                  |      |       |
| 2065.721179                          | 5068.223717                                 | 4357.189818  | 1804.074922    |                  |      |       |
| 3830.378238                          | -1.086351942                                | 0.016306909  | 0.098932971    |                  |      | TXNIP |
| 1                                    | 145992435                                   | 145996600    | -              | 3625             |      |       |
| protein_coding                       | thioredoxin interacting protein             | [Source:HGNC |                |                  |      |       |
| Symbol;Acc:HGNC:16952]               | -                                           | 1369         | 2085           | 2000             | 1994 | 4440  |
| 5051                                 | 18.4937133                                  | 27.25363839  | 34.32644524    |                  |      |       |
| 30.56533687                          | 75.28740348                                 | 64.78886558  |                |                  |      |       |
| ENSG00000223842                      | 5.443505796                                 | 8.849951531  | 9.299933199    |                  |      | 0     |
| 0                                    | 0                                           | 7.864463509  | 0              | 5.40745202       |      |       |
| 0.016308923                          | 0.098932971                                 | AL360093.1   | 1              | 219222248        |      |       |
| 219225497                            | -                                           | 1126         | lincRNA        | novel transcript |      |       |
| -                                    | 6                                           | 10           | 8              | 0                | 0    |       |
| 0.260940532                          | 0.420811937                                 | 0.442036817  | 0              | 0                |      | 0     |
| ENSG00000148218                      | 605.1363943                                 | 600.0267138  | 666.1077154    |                  |      |       |
| 479.6534131                          | 495.4074534                                 | 267.418104   | 623.7569412    |                  |      |       |
| 414.1596569                          | 0.592637675                                 | 0.01633039   | 0.099021632    |                  |      | ALAD  |
| 9                                    | 113386317                                   | 113401333    | -              | 4983             |      |       |
| protein_coding                       | aminolevulinate dehydratase                 | [Source:HGNC |                |                  |      |       |
| Symbol;Acc:HGNC:395]                 | -                                           | 667          | 678            | 573              | 463  | 434   |
| 310                                  | 6.554863168                                 | 6.447112484  | 7.15435657     |                  |      |       |
| 5.163000267                          | 5.353603492                                 | 2.892689537  |                |                  |      |       |
| ENSG00000176402                      | 9.07250966                                  | 10.61994184  | 8.137441549    |                  |      |       |
| 23.82727538                          | 35.38624667                                 | 44.85723035  | 9.276631015    |                  |      |       |
| 34.6902508                           | -1.900918433                                | 0.016334735  | 0.099021632    |                  |      | GJC3  |
| 7                                    | 99923269                                    | 99929620     | -              | 1116             |      |       |
| protein_coding                       | gap junction protein gamma 3                | [Source:HGNC |                |                  |      |       |
| Symbol;Acc:HGNC:17495]               | -                                           | 10           | 12             | 7                | 23   | 31    |
| 52                                   | 0.438797848                                 | 0.509499183  | 0.390248005    |                  |      |       |
| 1.14518509                           | 1.707437673                                 | 2.166557238  |                |                  |      |       |
| ENSG00000264895                      | 9.979760626                                 | 4.424975766  | 9.299933199    |                  |      | 0     |
| 0                                    | 0                                           | 7.90155653   | 0              | 5.413997147      |      |       |
| 0.016363951                          | 0.099127001                                 | AC006141.1   | 17             | 51249579         |      |       |
| 51251748                             | -                                           | 2170         | sense_intronic | "novel           |      |       |
| transcript, sense intronic to MBTD1" | -                                           | 11           | 5              |                  |      | 8     |
| 0                                    | 0                                           | 0            | 0.248234211    | 0.109178396      |      |       |
| 0.229370256                          | 0                                           | 0            | 0              |                  |      |       |
| ENSG00000135926                      | 2181.938573                                 | 2631.09059   | 3086.41533     |                  |      |       |



|                                      |                                                    |             |             |        |
|--------------------------------------|----------------------------------------------------|-------------|-------------|--------|
| 3365.86164                           | 3607.114177                                        | 3221.956834 | 2633.148165 |        |
| 3398.310884                          | -0.368371009                                       | 0.016367038 | 0.099127001 | TMBIM1 |
| 2                                    | 218274192                                          | 218292586   | - 5098      |        |
| protein_coding                       | transmembrane BAX inhibitor motif containing 1     |             |             |        |
| [Source:HGNC Symbol;Acc:HGNC:23410]  | -                                                  | 2405        | 2973        | 2655   |
| 3249                                 | 3160 3735                                          | 23.10169965 | 27.63258527 |        |
| 32.40197935                          | 35.41293513                                        | 38.10084536 | 34.06605107 |        |
| ENSG00000083812                      | 377.4164018                                        | 473.4724069 | 362.6973948 |        |
| 533.5237749                          | 522.8032573                                        | 690.1112362 | 404.5287345 |        |
| 582.1460895                          | -0.525154857                                       | 0.016368928 | 0.099127001 | ZNF324 |
| 19                                   | 58467045                                           | 58475436    | + 5664      |        |
| protein_coding                       | zinc finger protein 324 [Source:HGNC               |             |             |        |
| Symbol;Acc:HGNC:14096]               | zf-C2H2                                            | 416 535     | 312 515     | 458    |
| 800                                  | 3.596654903                                        | 4.475658875 | 3.42719011  |        |
| 5.052380241                          | 4.970380005                                        | 6.567464901 |             |        |
| ENSG00000148341                      | 774.7923249                                        | 771.7157735 | 813.7441549 |        |
| 634.0127189                          | 624.39603                                          | 392.5007656 | 786.7507511 |        |
| 550.3031715                          | 0.517174424                                        | 0.016383986 | 0.099142038 |        |
| SH3GLB2 9                            | 129007036                                          | 129028303   | - 6814      |        |
| protein_coding                       | "SH3 domain containing GRB2 like, endophilin B2    |             |             |        |
| [Source:HGNC Symbol;Acc:HGNC:10834]" | -                                                  | 854         | 872         | 700    |
| 612                                  | 547 455                                            | 6.137399944 | 6.063743143 |        |
| 6.391499472                          | 4.990698531                                        | 4.934379608 | 3.104847583 |        |
| ENSG00000139496                      | 3536.464265                                        | 3600.160283 | 3235.214262 |        |
| 4344.851868                          | 4507.751229                                        | 3971.590164 | 3457.279603 |        |
| 4274.731087                          | -0.305817523                                       | 0.016389918 | 0.099142038 | NUP58  |
| 13                                   | 25301524                                           | 25349800    | + 10422     |        |
| protein_coding                       | nucleoporin 58 [Source:HGNC Symbol;Acc:HGNC:20261] |             |             |        |
| -                                    | 3898 4068                                          | 2783 4194   | 3949 4604   |        |
| 18.31552827                          | 18.49508435                                        | 16.61380023 | 22.36090626 |        |
| 23.29074739                          | 20.54070116                                        |             |             |        |
| ENSG00000221829                      | 710.3775064                                        | 607.9916702 | 613.7955911 |        |
| 472.4016337                          | 509.1053554                                        | 415.7920198 | 644.0549226 |        |
| 465.7663363                          | 0.468927723                                        | 0.016391477 | 0.099142038 | FANCG  |
| 9                                    | 35073835                                           | 35080016    | - 3614      |        |
| protein_coding                       | FA complementation group G [Source:HGNC            |             |             |        |
| Symbol;Acc:HGNC:3588]                | -                                                  | 783 687     | 528 456     | 446    |
| 482                                  | 10.6096803                                         | 9.007308336 | 9.089764277 |        |
| 7.011141595                          | 7.585672184                                        | 6.201402331 |             |        |
| ENSG00000137054                      | 1493.33509                                         | 1771.760297 | 1476.364395 |        |
| 1913.43381                           | 1939.394616                                        | 2244.586796 | 1580.486594 |        |
| 2032.471741                          | -0.362839653                                       | 0.01639383  | 0.099142038 | POLR1E |
| 9                                    | 37485935                                           | 37503697    | + 2512      |        |
| protein_coding                       | RNA polymerase I subunit E [Source:HGNC            |             |             |        |
| Symbol;Acc:HGNC:17631]               | -                                                  | 1646 2002   | 1270 1847   | 1699   |
| 2602                                 | 32.08772148                                        | 37.76338175 | 31.45509003 |        |
| 40.85632542                          | 41.57393225                                        | 48.16357054 |             |        |
| ENSG00000114982                      | 1435.271028                                        | 1404.487308 | 1435.677188 |        |
| 1642.010064                          | 1797.849629                                        | 2019.438005 | 1425.145175 |        |
| 1819.7659                            | -0.353038048                                       | 0.016400611 | 0.099149145 | KANSL3 |

|                        |                                                            |                            |                        |        |  |
|------------------------|------------------------------------------------------------|----------------------------|------------------------|--------|--|
| 2                      | 96593170                                                   | 96642787                   | -                      | 9015   |  |
| protein_coding         | KAT8 regulatory                                            | NSL complex subunit 3      | [Source:HGNC           |        |  |
| Symbol;Acc:HGNC:25473] | -                                                          | 1582 1587                  | 1235 1585              | 1575   |  |
| 2341                   | 8.593487145                                                | 8.341374817                | 8.523305854            |        |  |
| 9.769572927            | 10.73895907                                                | 12.07443174                |                        |        |  |
| ENSG0000075790         | 1887.98926                                                 | 1514.226707                | 1789.074649            |        |  |
| 1609.895041            | 1168.887632                                                | 1010.150322                | 1730.430205            |        |  |
| 1262.977665            | 0.454574116                                                | 0.016411898                | 0.099169804            | BCAP29 |  |
| 7                      | 107579977                                                  | 107629170                  | +                      | 8409   |  |
| protein_coding         | B cell receptor                                            | associated protein 29      | [Source:HGNC           |        |  |
| Symbol;Acc:HGNC:24131] | -                                                          | 2081 1711                  | 1539 1554              | 1024   |  |
| 1171                   | 12.11871051                                                | 9.641222328                | 11.38678483            |        |  |
| 10.2687766             | 7.485192338                                                | 6.475056476                |                        |        |  |
| ENSG0000099341         | 4616.092915                                                | 5813.533161                | 5961.257181            |        |  |
| 6081.135065            | 7533.846066                                                | 7267.733956                | 5463.627752            |        |  |
| 6960.905029            | -0.34953649                                                | 0.01641524                 | 0.099169804            | PSMD8  |  |
| 19                     | 38374536                                                   | 38383824                   | +                      | 3105   |  |
| protein_coding         | "proteasome 26S                                            | subunit, non-ATPase 8      | [Source:HGNC           |        |  |
| Symbol;Acc:HGNC:9566]" | -                                                          | 5088 6569                  | 5128 5870              | 6600   |  |
| 8425                   | 80.24429793                                                | 100.2453181                | 102.7527038            |        |  |
| 105.0481819            | 130.6561002                                                | 126.1651252                |                        |        |  |
| ENSG0000161036         | 1045.153113                                                | 1292.977919                | 1033.455077            |        |  |
| 1099.162573            | 1813.830515                                                | 1821.031025                | 1123.862036            |        |  |
| 1578.008038            | -0.489413933                                               | 0.016464568                | 0.099433848            | LRWD1  |  |
| 7                      | 102464929                                                  | 102473168                  | +                      | 5926   |  |
| protein_coding         | leucine rich repeats and WD                                | repeat domain containing 1 | [Source:HGNC           |        |  |
| Symbol;Acc:HGNC:21769] | -                                                          | 1152 1461                  | 889                    |        |  |
| 1061                   | 1589 2111                                                  | 9.519617868                | 11.68194103            |        |  |
| 9.333552194            | 9.948687294                                                | 16.48198863                | 16.56370947            |        |  |
| ENSG0000144597         | 777.5140778                                                | 889.4201289                | 783.519372             |        |  |
| 1023.536873            | 997.6638578                                                | 1235.299113                | 816.8178596            |        |  |
| 1085.499948            | -0.410617936                                               | 0.016483025                | 0.09951134             | EAF1   |  |
| 3                      | 15427355                                                   | 15450635                   | +                      | 5152   |  |
| protein_coding         | ELL associated factor 1                                    | [Source:HGNC               |                        |        |  |
| Symbol;Acc:HGNC:20907] | -                                                          | 857 1005                   | 674 988                | 874    |  |
| 1432                   | 8.145798279                                                | 9.243078644                | 8.139371831            |        |  |
| 10.65597355            | 10.42756579                                                | 12.92403667                |                        |        |  |
| ENSG0000167962         | 1574.987677                                                | 1979.734158                | 1524.026553            |        |  |
| 1804.657118            | 2377.727478                                                | 2624.147976                | 1692.916129            |        |  |
| 2268.844191            | -0.422288307                                               | 0.016491043                | 0.099525778            | ZNF598 |  |
| 16                     | 1997654 2009823                                            | - 4701                     | protein_coding         | zinc   |  |
| finger protein 598     | [Source:HGNC                                               |                            | Symbol;Acc:HGNC:28079] | -      |  |
| 2237                   | 1311 1742                                                  | 2083 3042                  | 18.08373579            |        |  |
| 22.54769615            | 17.35079134                                                | 20.59064462                | 27.23619149            |        |  |
| 30.08846115            |                                                            |                            |                        |        |  |
| ENSG0000245694         | 421.8716992                                                | 529.2271016                | 440.5843353            |        |  |
| 270.3877772            | 237.4303003                                                | 401.1271561                | 463.8943787            |        |  |
| 302.9817445            | 0.612286958                                                | 0.016514667                | 0.099634359            | CRNDE  |  |
| 16                     | 54845189                                                   | 54929189                   | -                      | 5846   |  |
| lincRNA                | colorectal neoplasia differentially expressed [Source:HGNC |                            |                        |        |  |

|                                                          |              |             |             |             |             |      |
|----------------------------------------------------------|--------------|-------------|-------------|-------------|-------------|------|
| Symbol;Acc:HGNC:37078]                                   | -            | 465         | 598         | 379         | 261         | 208  |
|                                                          |              | 465         | 3.89513779  | 4.846953059 | 4.033548149 |      |
| 2.480811349                                              | 2.187015616  | 3.698496057 |             |             |             |      |
| ENSG00000261122                                          | 16.33051739  | 0.884995153 | 0           | 39.36680281 |             |      |
|                                                          | 57.07459141  | 16.39014186 | 5.73850418  | 37.61051203 |             |      |
|                                                          | -2.690647807 | 0.016526315 | 0.099670637 | LINC02167   |             |      |
|                                                          | 16           | 35743268    | 35756515    | +           | 1989        |      |
| lincRNA long intergenic non-protein coding RNA 2167      | [Source:HGNC |             |             |             |             |      |
| Symbol;Acc:HGNC:53028]                                   | -            | 18          | 1           | 0           | 38          | 50   |
|                                                          | 19           | 0.443165971 | 0.023822737 | 0           | 1.061599871 |      |
|                                                          | 1.545192464  | 0.444170628 |             |             |             |      |
| ENSG00000076356                                          | 714.0065102  | 710.651108  | 626.5829993 |             |             |      |
| 556.3150818                                              | 328.7496465  | 520.1713443 | 683.7468725 |             |             |      |
| 468.4120242                                              | 0.544728964  | 0.016533279 | 0.099678654 | PLXNA2      |             |      |
|                                                          | 1            | 208022242   | 208244320   | -           | 13781       |      |
| protein_coding plexin A2                                 | [Source:HGNC |             |             |             |             |      |
| Symbol;Acc:HGNC:9100]                                    | -            |             |             |             |             |      |
|                                                          | 787          | 803         | 539         | 537         | 288         | 603  |
|                                                          | 2.760967239  | 2.433407706 | 2.165237782 | 1.284573964 |             |      |
|                                                          | 2.034546394  |             |             |             |             |      |
| ENSG00000107372                                          | 2868.727554  | 2880.659223 | 3114.31513  |             |             |      |
| 3559.587748                                              | 3679.028162  | 3645.512605 | 2954.567303 |             |             |      |
| 3628.042839                                              | -0.296447896 | 0.01654148  | 0.09969412  | ZFAND5      |             |      |
|                                                          | 9            | 72351425    | 72365235    | -           | 7053        |      |
| protein_coding zinc finger AN1-type containing 5         | [Source:HGNC |             |             |             |             |      |
| Symbol;Acc:HGNC:13008]                                   | -            | 3162        | 3255        | 2679        | 3436        | 3223 |
|                                                          | 4226         | 21.95415193 | 21.86772229 | 23.63228287 |             |      |
| 27.07019068                                              | 28.08883855  | 27.86035378 |             |             |             |      |
| ENSG00000172260                                          | 74.39457921  | 64.60464618 | 77.88694054 |             |             |      |
| 46.61858227                                              | 15.98088559  | 19.84069804 | 72.29538864 |             |             |      |
| 27.4800553                                               | 1.395287934  | 0.01658661  | 0.099932068 | NEGR1       |             |      |
|                                                          | 1            | 71395940    | 72282734    | -           | 13406       |      |
| protein_coding neuronal growth regulator 1               | [Source:HGNC |             |             |             |             |      |
| Symbol;Acc:HGNC:17302]                                   | -            | 82          | 73          | 67          | 45          | 14   |
|                                                          | 23           | 0.299532065 | 0.258018048 | 0.310944181 |             |      |
| 0.186519972                                              | 0.064191301  | 0.079773682 |             |             |             |      |
| ENSG00000177119                                          | 2017.726148  | 1570.866397 | 2252.908817 |             |             |      |
| 1671.017182                                              | 1461.10954   | 1180.090214 | 1947.167121 |             |             |      |
| 1437.405645                                              | 0.437907803  | 0.016599861 | 0.099977846 | AN06        |             |      |
|                                                          | 12           | 45215987    | 45440404    | +           | 8235        |      |
| protein_coding anoctamin 6                               | [Source:HGNC |             |             |             |             |      |
| Symbol;Acc:HGNC:25240]                                   | -            |             |             |             |             |      |
|                                                          | 2224         | 1775        | 1938        | 1613        | 1280        | 1368 |
|                                                          | 10.21318491  | 14.64188582 | 10.88385651 | 9.554186759 |             |      |
|                                                          | 7.724200031  |             |             |             |             |      |
| ENSG00000160401                                          | 36.29003864  | 53.09970919 | 40.68720775 |             |             |      |
| 80.8055426                                               | 93.60232991  | 103.5166854 | 43.35898519 |             |             |      |
| 92.64151932                                              | -1.094565567 | 0.016614867 | 0.10000958  |             |             |      |
| CFAP157 9                                                | 127706989    | 127716002   | +           | 4703        |             |      |
| protein_coding cilia and flagella associated protein 157 | [Source:HGNC |             |             |             |             |      |
| Symbol;Acc:HGNC:27843]                                   | -            | 40          | 60          | 35          | 78          | 82   |
|                                                          | 120          | 0.416498744 | 0.604508918 | 0.463020172 |             |      |

|                                                   |                                                  |             |                        |                |             |
|---------------------------------------------------|--------------------------------------------------|-------------|------------------------|----------------|-------------|
| 0.921577085                                       | 1.071732088                                      | 1.186416794 |                        |                |             |
| ENSG00000244723                                   | 3.629003864                                      | 15.92991276 | 4.6499666              |                | 0           |
| 0                                                 | 0                                                | 8.06962774  | 0                      | 5.448344664    |             |
| 0.016616437                                       | 0.10000958                                       | ASLP1       | 22                     | 23649213       |             |
| 23653334                                          | -                                                | 637         | unprocessed_pseudogene |                |             |
| argininosuccinate lyase pseudogene 1 [Source:HGNC |                                                  |             |                        |                |             |
| Symbol;Acc:HGNC:747]                              | -                                                | 4           | 18                     | 4              | 0           |
| 0                                                 | 0.307502919                                      | 1.33893506  | 0.390685601            |                | 0           |
| 0                                                 | 0                                                |             |                        |                |             |
| ENSG00000149357                                   | 2122.060009                                      | 2624.895624 | 2395.89529             |                |             |
| 2496.684073                                       | 3185.903692                                      | 3758.51832  | 2380.950308            |                |             |
| 3147.035362                                       | -0.402693019                                     | 0.016625315 | 0.10002898             |                |             |
| LAMTOR1 11                                        | 72085895                                         | 72103387    | -                      | 2778           |             |
| protein_coding                                    | "late endosomal/lysosomal adaptor, MAPK and MTOR |             |                        |                |             |
| activator 1 [Source:HGNC Symbol;Acc:HGNC:26068]"  |                                                  |             |                        | -              | 2339        |
| 2966                                              | 2061                                             | 2410        | 2791                   | 4357           | 41.23126543 |
| 50.59007766                                       | 46.15859669                                      | 48.20552808 | 61.75540231            |                |             |
| 72.9266622                                        |                                                  |             |                        |                |             |
| ENSG00000260300                                   | 0                                                | 0.884995153 | 0                      | 4.14387398     | 0           |
|                                                   | 33.64292277                                      | 0.294998384 | 12.59559892            | -5.175111346   |             |
|                                                   | 0.016649503                                      | 0.100134838 | AC009119.2             | 16             |             |
| 83908132                                          | 83951445                                         | +           | 3055                   | protein_coding | novel       |
| protein -                                         | 0                                                | 1           | 0                      | 4              | 0           |
|                                                   | 0.015510122                                      | 0           | 0.072754661            | 0              | 0.59358704  |
| ENSG00000175182                                   | 58.97131279                                      | 59.29467526 | 86.02438209            |                |             |
| 14.50355893                                       | 41.09370581                                      | 20.70333709 | 68.09679005            |                |             |
| 25.43353394                                       | 1.425661901                                      | 0.016654231 | 0.100134838            |                |             |
| FAM131A 3                                         | 184335926                                        | 184348421   | +                      | 8925           |             |
| protein_coding                                    | family with sequence similarity 131 member A     |             |                        |                |             |
| [Source:HGNC Symbol;Acc:HGNC:28308]               |                                                  |             |                        | -              | 65          |
| 14                                                | 36                                               | 24          | 0.356643091            | 0.355707497    | 74          |
| 0.515858204                                       | 0.087162937                                      | 0.247937168 | 0.125035702            |                |             |
| ENSG00000159792                                   | 878.2189351                                      | 1202.708413 | 1032.292585            |                |             |
| 1113.666132                                       | 1467.958491                                      | 1720.102256 | 1037.739978            |                |             |
| 1433.90896                                        | -0.46682202                                      | 0.016664286 | 0.100161252            |                | PSKH1       |
| 16                                                | 67893272                                         | 67929678    | +                      | 3977           |             |
| protein_coding                                    | protein serine kinase H1 [Source:HGNC            |             |                        |                |             |
| Symbol;Acc:HGNC:9529]                             | -                                                | 968         | 1359                   | 888            | 1075        |
| 1994                                              | 11.91923685                                      | 16.19162014 | 13.8919823             |                | 1286        |
| 15.01982653                                       | 19.87617161                                      | 23.31312977 |                        |                |             |
| ENSG00000145041                                   | 1407.146248                                      | 1495.641809 | 1162.49165             |                |             |
| 1965.232235                                       | 1665.436577                                      | 1675.245026 | 1355.093236            |                |             |
| 1768.637946                                       | -0.383467493                                     | 0.016694365 | 0.100306804            |                | DCAF1       |
| 3                                                 | 51395867                                         | 51500002    | -                      | 6849           |             |
| protein_coding                                    | DDB1 and CUL4 associated factor 1 [Source:HGNC   |             |                        |                |             |
| Symbol;Acc:HGNC:30911]                            | -                                                | 1551        | 1690                   | 1000           | 1897        |
| 1942                                              | 11.08953447                                      | 11.69192388 | 9.084053439            |                | 1459        |
| 15.39048154                                       | 13.09409495                                      | 13.1841786  |                        |                |             |
| ENSG00000144227                                   | 71.67282631                                      | 39.82478189 | 63.93704074            |                |             |
| 31.07905485                                       | 11.41491828                                      | 18.11541995 | 58.47821632            |                |             |

|                                    |                        |                        |                             |              |             |
|------------------------------------|------------------------|------------------------|-----------------------------|--------------|-------------|
| 20.20313103                        | 1.530381545            | 0.016703383            | 0.100306804                 | NXP          | 2           |
|                                    | 138670772              | 138780348              | -                           | 1052         |             |
| protein_coding                     | neurexophilin 2        | [Source:HGNC           | Symbol;Acc:HGNC:8076]       |              |             |
| -                                  | 79                     | 45                     | 55                          | 30           | 10          |
|                                    |                        |                        |                             |              | 21          |
| 3.677392915                        | 2.026857493            | 3.252773299            | 1.584592363                 |              |             |
| 0.584294261                        | 0.928185058            |                        |                             |              |             |
| ENSG0000066583                     | 568.8463557            | 440.7275863            | 602.1706746                 |              |             |
| 735.5376314                        | 760.2335576            | 724.616798             | 537.2482055                 |              |             |
| 740.129329                         | -0.463172322           | 0.016705514            | 0.100306804                 | ISOC1        |             |
| 5                                  | 129094751              | 129114028              | +                           | 1940         |             |
| protein_coding                     | isochorismatase        | domain containing 1    | [Source:HGNC                |              |             |
| Symbol;Acc:HGNC:24254]             | -                      | 627                    | 498                         | 518          | 710         |
|                                    |                        |                        |                             |              | 666         |
| 840                                | 15.8268503             | 12.1633738             | 16.6124955                  |              |             |
| 20.33614653                        | 21.10181734            | 20.13300374            |                             |              |             |
| ENSG00000213693                    | 58.97131279            | 66.37463648            | 26.73730795                 |              |             |
| 141.9276838                        | 136.9790194            | 68.14848458            | 50.69441907                 |              |             |
| 115.6850626                        | -1.181504066           | 0.016716988            | 0.100341636                 |              |             |
| SEC14L1P1                          | 11                     | 43897456               | 43899636                    | +            | 2181        |
| processed_pseudogene               |                        | SEC14 like 1           | pseudogene 1                | [Source:HGNC |             |
| Symbol;Acc:HGNC:44189]             | -                      | 65                     | 75                          | 23           | 137         |
|                                    |                        |                        |                             |              | 120         |
| 79                                 | 1.459440435            | 1.629416233            | 0.656113565                 |              |             |
| 3.490414026                        | 3.38199484             | 1.684234052            |                             |              |             |
| ENSG00000228430                    | 1.814501932            | 0                      | 0                           | 0            | 11.41491828 |
|                                    | 36.2308399             | 0.604833977            | 15.88191939                 | -4.671057871 |             |
|                                    | 0.016723029            | 0.100343846            | AL162726.3                  | 9            |             |
| 81977614                           | 82780194               | +                      | 4429                        |              |             |
| transcribed_unprocessed_pseudogene |                        |                        | serine palmitoyltransferase |              |             |
| long chain base subunit 1 (SPTLC1) |                        | pseudogene             | -                           | 2            | 0           |
| 0                                  | 0                      | 10                     | 42                          | 0.022113272  | 0           |
| 0                                  | 0.138784728            | 0.440935056            |                             |              |             |
| ENSG00000101188                    | 176.9139384            | 192.0439482            | 189.4861389                 |              |             |
| 393.6680281                        | 289.9389244            | 219.9729565            | 186.1480085                 |              |             |
| 301.193303                         | -0.693242129           | 0.016758884            | 0.100524889                 | NTSR1        |             |
| 20                                 | 62708837               | 62762771               | +                           | 4237         |             |
| protein_coding                     | neurotensin receptor 1 | [Source:HGNC           |                             |              |             |
| Symbol;Acc:HGNC:8039]              | -                      | 195                    | 217                         | 163          | 380         |
|                                    |                        |                        |                             |              | 254         |
| 255                                | 2.253745284            | 2.426764933            | 2.393514082                 |              |             |
| 4.983531139                        | 3.68487375             | 2.79841896             |                             |              |             |
| ENSG00000253730                    | 2.721752898            | 3.539980612            | 0                           | 27.97114936  |             |
|                                    | 21.68834474            | 6.901112362            | 2.087244503                 | 18.85353549  |             |
|                                    | -3.131586006           | 0.016786553            | 0.100645675                 | AC015909.2   |             |
| 17                                 | 50158333               | 50161276               | -                           | 547          |             |
| antisense                          | novel transcript       |                        | -                           | 3            | 4           |
|                                    |                        |                        |                             |              | 0           |
| 27                                 | 19                     | 8                      | 0.268573162                 | 0.346496702  | 0           |
|                                    | 2.742764259            | 2.135077456            | 0.680038779                 |              |             |
| ENSG00000268592                    | 63.50756762            | 91.15450077            | 46.499666                   |              |             |
| 13.46759043                        | 10.27342645            | 42.26931322            | 67.05391146                 |              |             |
| 22.00344337                        | 1.595677073            | 0.016793915            | 0.100645675                 |              |             |
| RAET1E-AS1                         | 6                      | 149863494              | 149919507                   | +            | 1210        |
| antisense                          |                        | RAET1E antisense RNA 1 | [Source:NCBI                |              |             |

|                                              |                                                       |              |                               |             |             |        |
|----------------------------------------------|-------------------------------------------------------|--------------|-------------------------------|-------------|-------------|--------|
| gene;Acc:100652739]                          | -                                                     | 70           | 103                           | 40          | 13          | 9      |
| 49                                           | 2.832965941                                           | 4.033465023  | 2.056749818                   |             |             |        |
| 0.596994082                                  | 0.457198187                                           | 1.882962747  |                               |             |             |        |
| ENSG00000088280                              | 176.0066874                                           | 65.48964133  | 127.8740815                   |             |             |        |
| 66.30198367                                  | 63.92354238                                           | 37.09347895  | 123.1234701                   |             |             |        |
| 55.77300167                                  | 1.14572686                                            | 0.016797754  | 0.100645675                   |             |             | ASAP3  |
| 1                                            | 23428563                                              | 23484568     | -                             | 4988        |             |        |
| protein_coding                               | "ArfGAP with SH3 domain, ankyrin repeat and PH domain |              |                               |             |             |        |
| 3 [Source:HGNC Symbol;Acc:HGNC:14987]"       | -                                                     | 194          | 74                            | 110         |             |        |
| 64                                           | 56                                                    | 43           | 1.904600827                   | 0.702961784 |             |        |
| 1.372059948                                  | 0.71296067                                            | 0.690095098  | 0.400841823                   |             |             |        |
| ENSG00000140575                              | 8081.791605                                           | 6133.901406  | 8832.611556                   |             |             |        |
| 7078.772726                                  | 5524.820448                                           | 4640.998064  | 7682.768189                   |             |             |        |
| 5748.197079                                  | 0.418506376                                           | 0.01680178   | 0.100645675                   |             |             | IQGAP1 |
| 15                                           | 90388218                                              | 90502243     | +                             | 11535       |             |        |
| protein_coding                               | IQ motif containing GTPase activating protein 1       |              |                               |             |             |        |
| [Source:HGNC Symbol;Acc:HGNC:6110]           | -                                                     | 8908         | 6931                          | 7598        |             |        |
| 6833                                         | 4840                                                  | 5380         | 37.81736742                   | 28.47113239 |             |        |
| 40.98156479                                  | 32.91590995                                           | 25.79141223  | 21.68681102                   |             |             |        |
| ENSG00000154589                              | 227.7199925                                           | 274.3484975  | 166.2363059                   |             |             |        |
| 405.0636815                                  | 293.3633998                                           | 356.2699257  | 222.7682653                   |             |             |        |
| 351.565669                                   | -0.656037297                                          | 0.016854145  | 0.100897854                   |             |             | LY96   |
| 8                                            | 73991352                                              | 74029087     | +                             | 607         |             |        |
| protein_coding                               | lymphocyte antigen 96 [Source:HGNC                    |              |                               |             |             |        |
| Symbol;Acc:HGNC:17156]                       | -                                                     | 251          | 310                           | 143         | 391         | 257    |
| 413                                          | 20.24947248                                           | 24.19911278  | 14.65730729                   |             |             |        |
| 35.79316562                                  | 26.02506318                                           | 31.63678759  |                               |             |             |        |
| ENSG00000257557                              | 9.979760626                                           | 8.849951531  | 4.6499666                     | 0           |             |        |
| 0                                            | 0                                                     | 7.826559586  | 0                             | 5.403829271 |             |        |
| 0.016855286                                  | 0.100897854                                           | PPP1R12A-AS1 | 12                            | 79934901    |             |        |
| 79942712                                     | +                                                     | 3234         | bidirectional_promoter_lncRNA |             |             |        |
| PPP1R12A                                     | antisense RNA 1 [Source:HGNC Symbol;Acc:HGNC:51903]   |              |                               |             |             |        |
| -                                            | 11                                                    | 10           | 4                             | 0           | 0           | 0      |
| 0.166564081                                  | 0.146516463                                           | 0.076953224  | 0                             | 0           | 0           |        |
| ENSG00000136930                              | 2889.594327                                           | 3756.804425  | 3567.686874                   |             |             |        |
| 3927.356564                                  | 4361.640275                                           | 4717.772939  | 3404.695208                   |             |             |        |
| 4335.589926                                  | -0.348899638                                          | 0.016866983  | 0.100933714                   |             |             | PSMB7  |
| 9                                            | 124353466                                             | 124415444    | -                             | 1787        |             |        |
| protein_coding                               | proteasome subunit beta 7 [Source:HGNC                |              |                               |             |             |        |
| Symbol;Acc:HGNC:9544]                        | -                                                     | 3185         | 4245                          | 3069        | 3791        | 3821   |
| 5469                                         | 87.27976489                                           | 112.5588333  | 106.8511455                   |             |             |        |
| 117.8803117                                  | 131.4316153                                           | 142.3031092  |                               |             |             |        |
| ENSG00000185359                              | 3628.096613                                           | 4267.446628  | 4210.544756                   |             |             |        |
| 4276.477947                                  | 5448.340496                                           | 5740.862846  | 4035.362666                   |             |             |        |
| 5155.227096                                  | -0.353492828                                          | 0.01689329   | 0.101030681                   |             |             | HGS    |
| 17                                           | 81683326                                              | 81703138     | +                             | 8254        |             |        |
| protein_coding                               | hepatocyte growth factor-regulated tyrosine kinase    |              |                               |             |             |        |
| substrate [Source:HGNC Symbol;Acc:HGNC:4897] | -                                                     | 3999         | 4822                          |             |             |        |
| 3622                                         | 4128                                                  | 4773         | 6655                          | 23.72551363 | 27.68147211 |        |
| 27.30177153                                  | 27.78991815                                           | 35.54465719  | 37.48992861                   |             |             |        |

|                                                                                |                                                                                             |             |                |                  |                |
|--------------------------------------------------------------------------------|---------------------------------------------------------------------------------------------|-------------|----------------|------------------|----------------|
| ENSG00000110917                                                                | 4662.362714                                                                                 | 4158.592225 | 4202.407314    |                  |                |
| 3847.58699                                                                     | 3374.249844                                                                                 | 3239.209615 | 4341.120751    |                  |                |
| 3487.015483                                                                    | 0.316235542                                                                                 | 0.01689461  | 0.101030681    | MLEC             |                |
| 12                                                                             | 120686869                                                                                   | 120701864   | +              | 6723             |                |
| protein_coding                                                                 | malectin [Source:HGNC Symbol;Acc:HGNC:28973]                                                |             |                | -                |                |
| 5139                                                                           | 4699                                                                                        | 3615        | 3714           | 2956             | 3755           |
|                                                                                | 33.11835633                                                                                 | 33.45430692 | 30.69663935    | 27.02642978      |                |
|                                                                                | 25.97035273                                                                                 |             |                |                  |                |
| ENSG00000140943                                                                | 3537.371516                                                                                 | 3282.447023 | 3622.323981    |                  |                |
| 2976.337486                                                                    | 2821.767799                                                                                 | 2636.224922 | 3480.714173    |                  |                |
| 2811.443402                                                                    | 0.308097454                                                                                 | 0.016914068 | 0.101112859    | MBTPS1           |                |
| 16                                                                             | 84053761                                                                                    | 84116906    | -              | 10238            |                |
| protein_coding                                                                 | "membrane bound transcription factor peptidase, site 1 [Source:HGNC Symbol;Acc:HGNC:15456]" |             |                | -                |                |
| 2873                                                                           | 2472                                                                                        | 3056        | 18.64948286    | 17.16596208      |                |
| 18.93604035                                                                    | 15.59310289                                                                                 | 14.84159927 | 13.87935368    |                  |                |
| ENSG00000239713                                                                | 2.721752898                                                                                 | 5.309970919 | 16.2748831     | 0                |                |
| 0                                                                              | 0                                                                                           | 8.102202305 | 0              | 5.445788398      |                |
| 0.016955959                                                                    | 0.101329041                                                                                 | APOBEC3G    | 22             | 39077005         |                |
| 39087743                                                                       | +                                                                                           | 5437        | protein_coding | apolipoprotein   |                |
| B mRNA editing enzyme catalytic subunit 3G [Source:HGNC Symbol;Acc:HGNC:17357] | -                                                                                           | 3           | 6              | 14               | 0              |
| 0                                                                              | 0.027020327                                                                                 | 0.052289966 | 0.160204809    | 0                |                |
| 0                                                                              | 0                                                                                           |             |                |                  |                |
| ENSG00000276527                                                                | 8.165258694                                                                                 | 10.61994184 | 4.6499666      | 0                |                |
| 0                                                                              | 0                                                                                           | 7.811722377 | 0              | 5.401196892      |                |
| 0.01702792                                                                     | 0.101724713                                                                                 | AL356515.1  | 13             | 44684487         |                |
| 44715393                                                                       | -                                                                                           | 415         | lincRNA        | novel transcript |                |
| -                                                                              | 9                                                                                           | 12          | 4              | 0                | 0              |
| 1.061996526                                                                    | 1.370123105                                                                                 | 0.599678863 | 0              | 0                | 0              |
| ENSG00000143727                                                                | 1255.635337                                                                                 | 1511.571722 | 1421.727288    |                  |                |
| 1126.097754                                                                    | 983.9659559                                                                                 | 1115.392286 | 1396.311449    |                  |                |
| 1075.151998                                                                    | 0.376645291                                                                                 | 0.017039737 | 0.101759472    | ACP1             |                |
| 2                                                                              | 264140                                                                                      | 278283      | +              | 4160             | protein_coding |
| phosphatase 1 [Source:HGNC Symbol;Acc:HGNC:122]                                | -                                                                                           |             |                | 1384             | 1708           |
| 1223                                                                           | 1087                                                                                        | 862         | 1293           | 16.29188902      | 19.45454045    |
|                                                                                | 18.29110627                                                                                 | 14.5193862  | 12.73682833    | 14.45227485      |                |
| ENSG00000266338                                                                | 736.6877844                                                                                 | 707.9961225 | 585.8957915    |                  |                |
| 731.3937574                                                                    | 1144.916304                                                                                 | 974.7821212 | 676.8598995    |                  |                |
| 950.3640607                                                                    | -0.488515453                                                                                | 0.017045244 | 0.101759472    | NBPF15           |                |
| 1                                                                              | 144421386                                                                                   | 144461674   | -              | 5306             |                |
| protein_coding                                                                 | NBPF member 15 [Source:HGNC Symbol;Acc:HGNC:28791]                                          |             |                |                  |                |
| -                                                                              | 812                                                                                         | 800         | 504            | 706              | 1003           |
| 7.494065199                                                                    | 7.144127261                                                                                 | 5.90976399  | 7.393490157    |                  |                |
| 11.61932897                                                                    | 9.902439916                                                                                 |             |                |                  |                |
| ENSG00000213401                                                                | 1981.43611                                                                                  | 2201.867941 | 1786.749666    |                  |                |
| 2070.901021                                                                    | 3069.471526                                                                                 | 2763.895501 | 1990.017906    |                  |                |
| 2634.756016                                                                    | -0.404480141                                                                                | 0.01709443  | 0.101992064    |                  |                |
| MAGEA12 X                                                                      | 152733779                                                                                   | 152737669   | +              | 1943             |                |
| protein_coding                                                                 | MAGE family member A12 [Source:HGNC                                                         |             |                |                  |                |

|                                    |                                            |             |                              |                |           |             |
|------------------------------------|--------------------------------------------|-------------|------------------------------|----------------|-----------|-------------|
| Symbol;Acc:HGNC:6799]              | -                                          | 2184        | 2488                         | 1537           | 1999      | 2689        |
| 3204                               | 55.04381379                                | 60.67419406 |                              | 49.21618129    |           |             |
| 57.16787341                        | 85.06783143                                | 76.67445981 |                              |                |           |             |
| ENSG00000136738                    | 730.3370276                                | 624.8065781 |                              | 698.6574816    |           |             |
| 930.2997084                        | 937.1647909                                | 854.0126548 |                              | 684.6003624    |           |             |
| 907.1590514                        | -0.405982861                               | 0.017095736 |                              | 0.101992064    |           | STAM        |
| 10                                 | 17644125                                   | 17715914    |                              | +              | 3246      |             |
| protein_coding                     | signal transducing adaptor molecule        |             |                              |                |           |             |
| [Source:HGNC                       |                                            |             |                              |                |           |             |
| Symbol;Acc:HGNC:11357]             | -                                          | 805         | 706                          | 601            | 898       | 821         |
| 990                                | 12.14439959                                | 10.30582174 |                              | 11.51947809    |           |             |
| 15.37233587                        | 15.54683545                                | 14.18135397 |                              |                |           |             |
| ENSG00000105662                    | 612.394402                                 | 783.2207105 |                              | 769.5694722    |           |             |
| 839.1344809                        | 979.3999886                                | 1146.447291 |                              | 721.7281949    |           |             |
| 988.3272535                        | -0.454449405                               | 0.017110873 |                              | 0.102021967    |           | CRTC1       |
| 19                                 | 18683677                                   | 18782333    |                              | +              | 6965      |             |
| protein_coding                     | CREB regulated transcription coactivator 1 |             |                              |                |           |             |
| [Source:HGNC                       |                                            |             |                              |                |           |             |
| Symbol;Acc:HGNC:16062]             | -                                          |             |                              | 675            | 885       | 662         |
| 810                                | 858                                        | 1329        | 4.745820802                  | 6.020722224    |           |             |
| 5.913487938                        | 6.462133738                                | 7.572050946 |                              | 8.872272626    |           |             |
| ENSG00000256292                    | 6.350756762                                | 2.654985459 |                              | 15.11239145    |           | 0           |
| 0                                  | 0                                          | 8.03937789  | 0                            | 5.435057481    |           |             |
| 0.017112283                        | 0.102021967                                | LINC02376   |                              | 12             | 127274467 |             |
| 127284283                          | -                                          | 724         | lincRNA long intergenic non- |                |           |             |
| protein coding                     | RNA 2376                                   |             |                              |                |           |             |
| [Source:HGNC                       |                                            |             |                              |                |           |             |
| Symbol;Acc:HGNC:53298]             | -                                          |             |                              |                |           |             |
| 7                                  | 3                                          | 13          | 0                            | 0              | 0         | 0.473465302 |
| 0.196340155                        | 1.117150367                                | 0           | 0                            | 0              | 0         |             |
| ENSG00000237149                    | 41.73354444                                | 68.14462679 |                              | 79.04943219    |           |             |
| 138.8197783                        | 108.4417237                                | 126.8079397 |                              | 62.97586781    |           |             |
| 124.6898139                        | -0.98974482                                | 0.017128478 |                              | 0.10203947     |           |             |
| ZNF503-AS2                         | 10                                         | 75401519    | 75408982                     | +              |           | 3348        |
| antisense                          | ZNF503 antisense RNA 2                     |             |                              |                |           |             |
| [Source:HGNC                       |                                            |             |                              |                |           |             |
| Symbol;Acc:HGNC:23525]             | -                                          | 46          | 77                           | 68             | 134       | 95          |
| 147                                | 0.672823367                                | 1.089762142 |                              | 1.263660208    |           |             |
| 2.223982639                        | 1.744156763                                | 2.041563552 |                              |                |           |             |
| ENSG00000178623                    | 1.814501932                                | 2.654985459 |                              | 3.48747495     |           |             |
| 1.035968495                        | 7.990442797                                | 62.97265031 |                              | 2.65232078     |           |             |
| 23.9996872                         | -3.193731613                               | 0.017128719 |                              | 0.10203947     |           | GPR35       |
| 2                                  | 240605431                                  | 240631259   |                              | +              | 5089      |             |
| protein_coding                     | G protein-coupled receptor 35              |             |                              |                |           |             |
| [Source:HGNC                       |                                            |             |                              |                |           |             |
| Symbol;Acc:HGNC:4492]              | -                                          | 2           | 3                            | 3              | 1         | 7           |
| 73                                 | 0.019245368                                | 0.02793285  |                              | 0.036677156    |           |             |
| 0.010918918                        | 0.084549871                                | 0.666993232 |                              |                |           |             |
| ENSG00000180739                    | 8.165258694                                | 9.734946684 |                              | 34.8747495     |           |             |
| 4.14387398                         | 0                                          | 17.59165162 |                              | 1.381291327    |           |             |
| 3.679548237                        | 0.017137248                                | 0.10203947  |                              | S1PR5          | 19        |             |
| 10512742                           | 10517931                                   | -           | 2806                         | protein_coding |           |             |
| sphingosine-1-phosphate receptor 5 |                                            |             |                              |                |           |             |
| [Source:HGNC                       |                                            |             |                              |                |           |             |
| Symbol;Acc:HGNC:14299]             | -                                          | 9           | 11                           | 30             | 4         | 0           |
| 0                                  | 0.157066486                                | 0.185751128 |                              | 0.665181917    |           |             |
| 0.079210794                        | 0                                          | 0           |                              |                |           |             |



|                                                 |                                                               |             |             |                      |                |            |
|-------------------------------------------------|---------------------------------------------------------------|-------------|-------------|----------------------|----------------|------------|
| ENSG00000126368                                 | 304.8363246                                                   | 263.7285556 | 337.1225785 |                      |                |            |
| 258.9921237                                     | 731.6962619                                                   | 529.6603738 | 301.8958196 |                      |                |            |
| 506.7829198                                     | -0.747517422                                                  | 0.017138293 | 0.10203947  |                      |                | NR1D1      |
| 17                                              | 40092787                                                      | 40100725    | -           |                      | 2772           |            |
| protein_coding                                  | nuclear receptor subfamily 1 group D member 1                 |             |             |                      |                |            |
| [Source:HGNC Symbol;Acc:HGNC:7962]              |                                                               | THR-like    | 336         |                      | 298            |            |
| 290                                             | 250                                                           | 641         | 614         | 5.935738161          | 5.093889022    |            |
| 6.508960239                                     | 5.011397204                                                   | 14.21386426 | 10.29926336 |                      |                |            |
| ENSG00000185361                                 | 413.7064405                                                   | 385.8578868 | 567.2959251 |                      |                |            |
| 249.6684073                                     | 357.2869422                                                   | 297.6104706 | 455.6200841 |                      |                |            |
| 301.52194                                       | 0.594756824                                                   | 0.017150974 | 0.102063481 |                      |                |            |
| TNFAIP8L1                                       | 19                                                            | 4639518     | 4655568 +   | 6667                 | protein_coding |            |
|                                                 | TNF alpha induced protein 8 like 1 [Source:HGNC               |             |             |                      |                |            |
| Symbol;Acc:HGNC:28279]                          | -                                                             | 456         | 436         | 488                  | 241            | 313        |
| 345                                             | 3.349369576                                                   | 3.098720997 | 4.554033421 |                      |                |            |
| 2.008623924                                     | 2.885766866                                                   | 2.406133158 |             |                      |                |            |
| ENSG00000136448                                 | 3181.729138                                                   | 3199.257479 | 3810.647628 |                      |                |            |
| 3948.075934                                     | 4192.699485                                                   | 4653.07501  | 3397.211415 |                      |                |            |
| 4264.61681                                      | -0.32854372                                                   | 0.017153866 | 0.102063481 |                      |                | NMT1       |
| 17                                              | 45051610                                                      | 45109016    | +           | 6669                 |                |            |
| protein_coding                                  | N-myristoyltransferase 1 [Source:HGNC                         |             |             |                      |                |            |
| Symbol;Acc:HGNC:7857]                           | -                                                             | 3507        | 3615        | 3278                 | 3811           | 3673       |
| 5394                                            | 25.75157119                                                   | 25.68467206 | 30.58123911 |                      |                |            |
| 31.75340298                                     | 33.85381146                                                   | 37.608087   |             |                      |                |            |
| ENSG00000226808                                 | 10.88701159                                                   | 1.769990306 | 11.6249165  |                      |                | 0          |
| 0                                               | 0                                                             | 8.093972799 | 0           | 5.44722547           |                |            |
| 0.017163932                                     | 0.102089037                                                   | LINC00840   | 10          | 43845261             |                |            |
| 43895433                                        | +                                                             | 3825        | lincRNA     | long intergenic non- |                |            |
| protein_coding                                  | RNA 840 [Source:HGNC Symbol;Acc:HGNC:44987]                   |             |             |                      |                |            |
| 12                                              | 2                                                             | 10          | 0           | 0                    | 0              | 0.15363087 |
| 0.024775647                                     | 0.162657992                                                   | 0           | 0           | 0                    | 0              |            |
| ENSG00000108785                                 | 114.3136217                                                   | 162.8391082 | 180.1862057 |                      |                |            |
| 211.337573                                      | 257.9771532                                                   | 282.9456069 | 152.4463119 |                      |                |            |
| 250.7534443                                     | -0.720636407                                                  | 0.017183518 | 0.102144611 |                      |                |            |
| HSD17B1P1                                       | 17                                                            | 42546764    | 42548706    | +                    | 955            |            |
|                                                 | unprocessed_pseudogene hydroxysteroid 17-beta dehydrogenase 1 |             |             |                      |                |            |
| pseudogene 1 [Source:HGNC Symbol;Acc:HGNC:5216] | -                                                             |             |             |                      | 126            | 184        |
| 155                                             | 204                                                           | 226         | 328         | 6.460942219          | 9.129371755    |            |
| 10.09799551                                     | 11.86967532                                                   | 14.54629624 | 15.96987402 |                      |                |            |
| ENSG00000218052                                 | 3.629003864                                                   | 6.194966072 | 13.9498998  |                      |                | 0          |
| 0                                               | 0                                                             | 7.924623245 | 0           | 5.415091143          |                |            |
| 0.017184825                                     | 0.102144611                                                   | ADAMTS7P4   | 15          | 85255369             |                |            |
| 85330334                                        | -                                                             | 5516        |             |                      |                |            |
| transcribed_unprocessed_pseudogene              | ADAMTS7 pseudogene 4                                          |             |             |                      |                |            |
| [Source:HGNC Symbol;Acc:HGNC:49410]             | -                                                             |             |             |                      | 4              | 7          |
| 0                                               | 0                                                             | 0           | 0.035511124 | 0.060131249          |                | 12         |
| 0.135351738                                     | 0                                                             | 0           | 0           |                      |                |            |
| ENSG00000133422                                 | 923.5814834                                                   | 935.4398768 | 864.8937875 |                      |                |            |
| 982.0981332                                     | 1221.396256                                                   | 1487.189714 | 907.9717159 |                      |                |            |
| 1230.228034                                     | -0.438528963                                                  | 0.017195182 | 0.10217184  |                      |                | MORC2      |

|                        |                                          |             |             |              |              |
|------------------------|------------------------------------------|-------------|-------------|--------------|--------------|
| 22                     | 30925130                                 | 30968298    | -           | 6258         |              |
| protein_coding         | MORC family CW-type zinc finger          |             | 2           | [Source:HGNC |              |
| Symbol;Acc:HGNC:23573] | -                                        | 1018 1057   | 744         | 948          | 1070         |
| 1724                   | 7.966011018                              | 8.003240528 | 7.396805914 |              |              |
| 8.417532894            | 10.50982729                              | 12.80951601 |             |              |              |
| ENSG00000112237        | 1080.5359                                | 903.5800513 | 856.756346  |              |              |
| 1281.493028            | 1211.12283                               | 1226.672722 | 946.9574326 |              |              |
| 1239.76286             | -0.388094419                             | 0.017245985 | 0.102415311 |              | CCNC         |
| 6                      | 99542380                                 | 99568973    | -           | 5765         |              |
| protein_coding         | cyclin C [Source:HGNC                    |             |             |              | -            |
| Symbol;Acc:HGNC:1581]  | -                                        |             |             |              |              |
| 1191                   | 1021 737                                 | 1237 1061   | 1422        | 10.11675269  |              |
| 8.391756455            | 7.953806529                              | 11.92291456 | 11.31262608 |              |              |
| 11.46915185            |                                          |             |             |              |              |
| ENSG00000126467        | 36.29003864                              | 14.15992245 | 5.812458249 |              |              |
| 71.48182615            | 70.77249335                              | 40.54403513 | 18.75413978 |              |              |
| 60.93278487            | -1.687051799                             | 0.017247737 | 0.102415311 |              | TSKS         |
| 19                     | 49739753                                 | 49763330    | -           | 2391         |              |
| protein_coding         | testis specific serine kinase substrate  |             |             |              | [Source:HGNC |
| Symbol;Acc:HGNC:30719] | -                                        | 40 16       | 5 69        | 62           |              |
| 47                     | 0.819236133                              | 0.317078538 | 0.130105985 |              |              |
| 1.6035465              | 1.593894139                              | 0.914006533 |             |              |              |
| ENSG00000163029        | 1507.851105                              | 1217.753331 | 1147.379258 |              |              |
| 1117.810006            | 971.4095458                              | 674.5837334 | 1290.994565 |              |              |
| 921.2677617            | 0.488022699                              | 0.017279492 | 0.102569439 |              | SMC6         |
| 2                      | 17663812                                 | 17800242    | -           | 9824         |              |
| protein_coding         | structural maintenance of chromosomes 6  |             |             |              | [Source:HGNC |
| Symbol;Acc:HGNC:20466] | -                                        | 1662 1376   | 987 1079    | 851          |              |
| 782                    | 8.284596274                              | 6.636766236 | 6.250800605 |              |              |
| 6.103024797            | 5.324619355                              | 3.701258497 |             |              |              |
| ENSG00000246695        | 140.6238997                              | 173.45905   | 118.5741483 |              |              |
| 221.6972579            | 172.3652661                              | 368.3468723 | 144.2190327 |              |              |
| 254.1364654            | -0.817962028                             | 0.017295865 | 0.10260696  |              |              |
| RASSF8-AS1             | 12                                       | 25939329    | 25959765    | -            | 3981         |
| antisense              | RASSF8 antisense RNA 1                   |             |             |              | [Source:HGNC |
| Symbol;Acc:HGNC:48637] | -                                        | 155 196     | 102 214     | 151          |              |
| 427                    | 1.906637823                              | 2.332868906 | 1.594097354 |              |              |
| 2.986989111            | 2.331482338                              | 4.987314039 |             |              |              |
| ENSG00000007047        | 694.9542399                              | 873.4902161 | 828.8565464 |              |              |
| 856.7459453            | 1333.262455                              | 1134.370345 | 799.1003341 |              |              |
| 1108.126248            | -0.47156425                              | 0.017297414 | 0.10260696  |              | MARK4        |
| 19                     | 45079288                                 | 45305283    | +           | 6668         |              |
| protein_coding         | microtubule affinity regulating kinase 4 |             |             |              | [Source:HGNC |
| Symbol;Acc:HGNC:13538] | -                                        | 766 987     | 713 827     | 1168         |              |
| 1315                   | 5.625509495                              | 7.013713189 | 6.652743592 |              |              |
| 6.891630146            | 10.76699749                              | 9.169827793 |             |              |              |
| ENSG00000126705        | 1026.100843                              | 1100.93397  | 1076.467268 |              |              |
| 809.0913945            | 762.5165412                              | 883.3423824 | 1067.834027 |              |              |
| 818.3167727            | 0.383268132                              | 0.017303657 | 0.102609583 |              | AHDC1        |
| 1                      | 27534035                                 | 27604431    | -           | 8297         |              |
| protein_coding         | AT-hook DNA binding motif containing 1   |             |             |              | [Source:HGNC |

|                                     |                                                     |             |             |             |       |             |
|-------------------------------------|-----------------------------------------------------|-------------|-------------|-------------|-------|-------------|
| Symbol;Acc:HGNC:25230]              | -                                                   | 1131        | 1244        | 926         | 781   | 668         |
| 1024                                | 6.67529093                                          | 7.104372608 |             | 6.94379264  |       |             |
| 5.230485319                         | 4.948832247                                         | 5.738651939 |             |             |       |             |
| ENSG00000173535                     | 7.258007728                                         | 14.15992245 |             | 17.43737475 |       |             |
| 29.00711786                         | 37.66923033                                         | 63.83528935 |             | 12.95176831 |       |             |
| 43.50387918                         | -1.758401296                                        | 0.017354395 |             | 0.102875969 |       |             |
| TNFRSF10C                           | 8                                                   | 23102590    | 23117437    |             | +     | 1868        |
| protein_coding                      | TNF receptor superfamily member 10c                 |             |             |             |       |             |
| [Source:HGNC Symbol;Acc:HGNC:11906] | -                                                   |             |             | 8           | 16    | 15          |
| 28                                  | 33                                                  | 74          | 0.209720941 | 0.405853739 |       |             |
| 0.499598624                         | 0.832900654                                         | 1.085886486 | 1.841984053 |             |       |             |
| ENSG00000135298                     | 57.15681086                                         | 31.85982551 | 53.4746159  |             |       |             |
| 11.39565344                         | 18.26386925                                         | 17.25278091 | 47.49708409 |             |       |             |
| 15.63743453                         | 1.601428464                                         | 0.017366244 | 0.102881512 |             |       | ADGRB3      |
| 6                                   | 68635367                                            | 69389511    |             | +           | 6490  |             |
| protein_coding                      | adhesion G protein-coupled receptor B3 [Source:HGNC |             |             |             |       |             |
| Symbol;Acc:HGNC:945]                | -                                                   | 63          | 36          | 46          | 11    | 16          |
| 20                                  | 0.475362082                                         | 0.262835634 | 0.440981105 |             |       |             |
| 0.094180292                         | 0.151538382                                         | 0.143290143 |             |             |       |             |
| ENSG00000100908                     | 241.328757                                          | 200.0089046 | 209.248497  |             |       |             |
| 76.66166862                         | 192.912119                                          | 62.11001126 | 216.8620528 |             |       |             |
| 110.5612663                         | 0.977509853                                         | 0.017366962 | 0.102881512 |             |       | EMC9        |
| 14                                  | 24138959                                            | 24141588    |             | -           | 1588  |             |
| protein_coding                      | ER membrane protein complex subunit 9 [Source:HGNC  |             |             |             |       |             |
| Symbol;Acc:HGNC:20273]              | -                                                   | 266         | 226         | 180         | 74    | 169         |
| 72                                  | 8.202756546                                         | 6.743484784 | 7.052268741 |             |       |             |
| 2.589364951                         | 6.541593703                                         | 2.108205861 |             |             |       |             |
| ENSG00000112576                     | 1791.820658                                         | 2156.733188 | 2169.209419 |             |       |             |
| 1663.765403                         | 1545.579935                                         | 1598.470151 | 2039.254422 |             |       |             |
| 1602.605163                         | 0.347328828                                         | 0.0174132   | 0.10312089  |             |       | CCND3       |
| 6                                   | 41934933                                            | 42050357    |             | -           | 5802  |             |
| protein_coding                      | cyclin D3 [Source:HGNC Symbol;Acc:HGNC:1585]        |             |             |             |       | -           |
| 1975                                | 2437                                                | 1866        | 1606        | 1354        | 1853  | 16.66932673 |
| 19.90234478                         | 20.00970848                                         | 15.38083312 | 14.3445953  |             |       |             |
| 14.85007725                         |                                                     |             |             |             |       |             |
| ENSG00000065615                     | 1059.669128                                         | 900.9250659 | 746.3196392 |             |       |             |
| 1073.263361                         | 1341.252898                                         | 1247.376059 | 902.3046111 |             |       |             |
| 1220.630773                         | -0.434869088                                        | 0.017441416 | 0.103253417 |             |       | CYB5R4      |
| 6                                   | 83859643                                            | 83967424    |             | +           | 9635  |             |
| protein_coding                      | cytochrome b5 reductase 4 [Source:HGNC              |             |             |             |       |             |
| Symbol;Acc:HGNC:20147]              | -                                                   | 1168        | 1018        | 642         | 1036  | 1175        |
| 1446                                | 5.936354221                                         | 5.006364887 | 4.145626346 |             |       |             |
| 5.974754707                         | 7.496067832                                         | 6.978267158 |             |             |       |             |
| ENSG00000136830                     | 13083.46618                                         | 15753.79872 | 18348.7682  |             |       |             |
| 12569.40575                         | 13243.58819                                         | 11474.82458 | 15728.6777  |             |       |             |
| 12429.27284                         | 0.339620215                                         | 0.01747984  | 0.103446265 |             |       |             |
| FAM129B                             | 9                                                   | 127505339   | 127578989   |             | -     | 4629        |
| protein_coding                      | family with sequence similarity 129 member B        |             |             |             |       |             |
| [Source:HGNC Symbol;Acc:HGNC:25282] | -                                                   |             |             | 14421       | 17801 | 15784       |
| 12133                               | 11602                                               | 13302       | 152.558665  | 182.2148048 |       |             |

|                                     |                                                    |                                     |                         |             |             |      |
|-------------------------------------|----------------------------------------------------|-------------------------------------|-------------------------|-------------|-------------|------|
| 212.1469235                         | 145.6441551                                        | 154.0611164                         | 133.6167121             |             |             |      |
| ENSG0000049449                      | 2501.290913                                        | 2677.995333                         | 2548.181697             |             |             |      |
| 2088.512486                         | 2062.675734                                        | 2101.388714                         | 2575.822648             |             |             |      |
| 2084.192311                         | 0.305553104                                        | 0.01749143                          | 0.103480235             |             | RCN1        |      |
| 11                                  | 32090904                                           | 32105755                            | +                       | 4675        |             |      |
| protein_coding                      | reticulocalbin 1                                   | [Source:HGNC Symbol;Acc:HGNC:9934]  |                         |             |             |      |
| -                                   | 2757                                               | 3026                                | 2192                    | 2016        | 1807        | 2436 |
| 28.87911196                         | 30.66999812                                        | 29.17197154                         | 23.96188371             |             |             |      |
| 23.75876695                         | 24.22850889                                        |                                     |                         |             |             |      |
| ENSG00000197355                     | 798.3808501                                        | 784.9907008                         | 780.0318971             |             |             |      |
| 521.0921529                         | 689.4610642                                        | 518.4460662                         | 787.8011493             |             |             |      |
| 576.3330945                         | 0.452192092                                        | 0.017504148                         | 0.103520852             |             | UAP1L1      |      |
| 9                                   | 137077501                                          | 137084539                           | +                       | 5283        |             |      |
| protein_coding                      | UDP-N-acetylglucosamine pyrophosphorylase 1 like 1 | [Source:HGNC Symbol;Acc:HGNC:28082] |                         |             |             |      |
| -                                   | 503                                                | 604                                 | 601                     | 8.15700531  | 7.955536085 | 671  |
| 7.902213444                         | 5.290532882                                        | 7.027545856                         | 5.289624939             |             |             |      |
| ENSG00000155714                     | 9.979760626                                        | 6.194966072                         | 6.974949899             |             | 0           |      |
| 0                                   | 0                                                  | 7.716558866                         | 0                       | 5.38149382  |             |      |
| 0.017508446                         | 1                                                  | PDZD9                               | 16                      | 21983865    | 22001110    |      |
| -                                   | 1331                                               | protein_coding                      | PDZ domain containing 9 |             |             |      |
| [Source:HGNC Symbol;Acc:HGNC:28740] | -                                                  | 11                                  | 7                       | 6           |             |      |
| 0                                   | 0                                                  | 0                                   | 0.40470942              | 0.249199075 |             |      |
| 0.280465884                         | 0                                                  | 0                                   | 0                       |             |             |      |
| ENSG00000261327                     | 30.84653284                                        | 19.46989337                         | 63.93704074             |             | 0           |      |
| 15.98088559                         | 0                                                  | 38.08448899                         | 5.326961865             |             |             |      |
| 2.866890297                         | 0.01751832                                         | 0.103564131                         | AC134312.5              |             | 16          |      |
| 88177298                            | 88178941                                           | -                                   | 1507                    | lincRNA     | novel       |      |
| transcript                          | -                                                  | 34                                  | 22                      | 55          | 0           | 14   |
| 1.104827176                         | 0.691728818                                        | 2.270681825                         | 0                       |             |             |      |
| 0.571034232                         | 0                                                  |                                     |                         |             |             |      |
| ENSG00000227214                     | 13.60876449                                        | 10.61994184                         | 8.137441549             |             |             |      |
| 41.4387398                          | 28.5372957                                         | 42.26931322                         | 10.78871596             |             |             |      |
| 37.41511624                         | -1.789581241                                       | 0.017529854                         | 0.103564131             |             | HCG15       |      |
| 6                                   | 28986203                                           | 28987484                            | +                       | 1032        |             |      |
| antisense                           | HLA complex group 15                               | [Source:HGNC Symbol;Acc:HGNC:18361] |                         |             |             |      |
| -                                   | 49                                                 | 0.711770928                         | 0.550970047             | 0.422012378 |             | 25   |
| 2.153735357                         | 1.489044482                                        | 2.207737329                         |                         |             |             |      |
| ENSG00000253659                     | 5.443505796                                        | 3.539980612                         | 0                       | 17.61146441 |             |      |
| 30.82027936                         | 16.39014186                                        | 2.994495469                         | 21.60729521             |             |             |      |
| -2.814893249                        | 0.017534293                                        | 0.103564131                         | AC138646.1              |             |             |      |
| 8                                   | 79297717                                           | 79314471                            | +                       | 633         |             |      |
| lincRNA novel transcript            | -                                                  | 6                                   | 4                       | 0           |             | 17   |
| 27                                  | 19                                                 | 0.464169098                         | 0.299421321             | 0           |             |      |
| 1.492303835                         | 2.621847422                                        | 1.395664105                         |                         |             |             |      |
| ENSG00000115009                     | 22.68127415                                        | 50.44472373                         | 8.137441549             |             |             |      |
| 46.61858227                         | 60.49906689                                        | 141.4728034                         | 27.08781314             |             |             |      |
| 82.8634842                          | -1.605755929                                       | 0.017534885                         | 0.103564131             |             | CCL20       |      |
| 2                                   | 227805739                                          | 227817564                           | +                       | 1594        |             |      |

|                                    |                                                        |             |                |             |     |             |
|------------------------------------|--------------------------------------------------------|-------------|----------------|-------------|-----|-------------|
| protein_coding                     | C-C motif chemokine ligand 20 [Source:HGNC             |             |                |             |     |             |
| Symbol;Acc:HGNC:10619]             | -                                                      | 25          | 57             | 7           | 45  | 53          |
| 164                                | 0.768033874                                            | 1.694388439 | 0.273222568    |             |     |             |
| 1.568686794                        | 2.043783613                                            | 4.783949088 |                |             |     |             |
| ENSG00000151612                    | 391.9324173                                            | 248.683638  | 453.3717435    |             |     |             |
| 255.8842182                        | 243.1377594                                            | 182.0168386 | 364.6625996    |             |     |             |
| 227.0129387                        | 0.683713215                                            | 0.0175489   | 0.103612312    |             |     | ZNF827      |
| 4                                  | 145757627                                              | 145938635   | -              | 8433        |     |             |
| protein_coding                     | zinc finger protein 827 [Source:HGNC                   |             |                |             |     |             |
| Symbol;Acc:HGNC:27193]             | zf-C2H2                                                | 432         | 281            | 390         | 247 | 213         |
| 211                                | 2.508593716                                            | 1.578885588 | 2.877327876    |             |     |             |
| 1.627522108                        | 1.552547382                                            | 1.163406198 |                |             |     |             |
| ENSG00000065029                    | 939.9120008                                            | 876.1452016 | 889.3061122    |             |     |             |
| 664.0558052                        | 743.1111801                                            | 642.6660887 | 901.7877715    |             |     |             |
| 683.2776914                        | 0.401053853                                            | 0.017584994 | 0.103750458    |             |     | ZNF76       |
| 6                                  | 35258909                                               | 35295985    | +              | 6789        |     |             |
| protein_coding                     | zinc finger protein 76 [Source:HGNC                    |             |                |             |     |             |
| Symbol;Acc:HGNC:13149]             | zf-C2H2                                                | 1036        | 990            | 765         | 641 | 651         |
| 745                                | 7.47278746                                             | 6.90964646  | 7.010717592    |             |     |             |
| 5.246434612                        | 5.894168405                                            | 5.10248201  |                |             |     |             |
| ENSG00000162409                    | 303.9290736                                            | 228.3287495 | 203.4360387    |             |     |             |
| 404.027713                         | 397.2391562                                            | 322.6270029 | 245.2312873    |             |     |             |
| 374.6312907                        | -0.608794551                                           | 0.017585974 | 0.103750458    |             |     | PRKAA2      |
| 1                                  | 56645322                                               | 56715335    | +              | 9354        |     |             |
| protein_coding                     | protein kinase AMP-activated catalytic subunit alpha 2 |             |                |             |     |             |
| [Source:HGNC Symbol;Acc:HGNC:9377] | -                                                      |             | 335            | 258         | 175 |             |
| 390                                | 348                                                    | 374         | 1.753784086    | 1.306919329 |     |             |
| 1.163985391                        | 2.316750605                                            | 2.286805555 | 1.859110719    |             |     |             |
| ENSG00000278272                    | 9.979760626                                            | 11.50493699 | 2.3249833      | 0           |     |             |
| 0                                  | 0                                                      | 7.936560305 | 0              | 5.425649404 |     |             |
| 0.017589893                        | 0.103750458                                            | HIST1H3C    | 6              | 26045411    |     |             |
| 26045821                           | +                                                      | 411         | protein_coding | histone     |     |             |
| cluster 1 H3 family member c       | [Source:HGNC Symbol;Acc:HGNC:4768]                     |             |                |             |     | -           |
| 11                                 | 13                                                     | 2           | 0              | 0           | 0   | 1.310628317 |
| 1.498745773                        | 0.302757577                                            | 0           | 0              | 0           |     |             |
| ENSG00000108591                    | 758.4618076                                            | 999.1595279 | 902.0935203    |             |     |             |
| 1107.450321                        | 1214.547305                                            | 1193.0298   | 886.5716186    |             |     |             |
| 1171.675809                        | -0.402292742                                           | 0.017621112 | 0.103899947    |             |     | DRG2        |
| 17                                 | 18087886                                               | 18107971    | +              | 7411        |     |             |
| protein_coding                     | developmentally regulated GTP binding protein 2        |             |                |             |     |             |
| [Source:HGNC Symbol;Acc:HGNC:3030] | -                                                      |             | 836            | 1129        | 776 |             |
| 1069                               | 1064                                                   | 1383        | 5.524056956    | 7.218443632 |     |             |
| 6.514659997                        | 8.015173645                                            | 8.824948403 | 8.677135613    |             |     |             |
| ENSG00000276317                    | 0                                                      | 2.654985459 | 2.3249833      | 0           |     |             |
| 19.40536108                        | 44.85723035                                            | 1.659989586 |                |             |     |             |
| 21.42086381                        | -3.705082211                                           | 0.017628885 | 0.103911147    |             |     |             |
| AL357033.3                         | 20                                                     | 62651272    | 62652186       | -           |     | 614         |
| antisense                          | "novel transcript, antisense to SLC04A1"               |             |                |             |     |             |
| -                                  | 0                                                      | 3           | 2              | 0           | 17  | 52          |
| 0.231515101                        | 0.202660202                                            | 0           | 1.701875987    |             |     | 0           |

3.937911853  
ENSG00000187144 0 24.77986429 4.6499666 0 0  
0 9.809943629 0 5.729847384 0.01765879  
0.104052744 SPATA21 1 16387117 16437424  
- 4506 protein\_coding spermatogenesis associated 21  
[Source:HGNC Symbol;Acc:HGNC:28026] - 0 28 4  
0 0 0 0 0.294437611 0.055230077  
0 0 0

ENSG00000180801 1013.399329 1072.614126 1236.891115  
908.54437 802.4687552 813.4686197 1107.634857  
841.493915 0.395822151 0.017678253 0.104132738 ARSJ  
4 113900284 113979727 - 5146  
protein\_coding arylsulfatase family member J [Source:HGNC  
Symbol;Acc:HGNC:26286] - 1117 1212 1064 877 703  
943 10.62948136 11.15987368 12.86407883  
9.469822857 8.397169184 8.520653977  
ENSG00000007923 1046.060364 1180.583534 1252.003507  
1269.061406 1596.947068 1732.179203 1159.549135  
1532.729226 -0.403209039 0.017688589 0.104158936  
DNAJC11 1 6634168 6701924 - 5083 protein\_coding DnaJ  
heat shock protein family (Hsp40) member C11 [Source:HGNC  
Symbol;Acc:HGNC:25570] - 1153 1334 1077 1225 1399  
2008 11.10805141 12.43546876 13.18264146  
13.39146291 16.91784201 18.36853909  
ENSG00000103126 1197.571275 1251.383147 1172.954075  
1450.355893 1401.751965 1915.92132 1207.302832  
1589.343059 -0.397208519 0.017712872 0.104267221 AXIN1  
16 287440 352673 - 7487 protein\_coding axin 1  
[Source:HGNC Symbol;Acc:HGNC:903] - 1320 1414 1009  
1400 1228 2221 8.633656816 8.94886625  
8.384751188 10.3903995 10.08179573 13.79341311  
ENSG00000257298 6.350756762 9.734946684 6.974949899 0  
0 0 7.686884449 0 5.376150456  
0.01773226 1 AC008147.2 12 50185580  
50191363 - 4713 sense\_intronic "novel transcript,  
sense intronic to LIMA1" - 7 11 6 0  
0 0 0.072732629 0.110591484 0.07920647  
0 0 0

ENSG00000106006 19.05227029 30.97483036 22.08734135  
5.179842475 0 6.038473317 24.03814733 3.739438597  
2.659129369 0.017744351 0.104415541 HOXA6 7  
27145396 27150603 - 1285 protein\_coding  
homeobox A6 [Source:HGNC Symbol;Acc:HGNC:5107] Homeobox  
21 35 19 5 0 7 0.80028532  
1.290599099 0.919935376 0.216211565 0

0.2532946  
ENSG00000233328 15.42326642 28.3198449 32.5497662  
50.76245625 70.77249335 74.18695789 25.43095917  
65.24063583 -1.364815116 0.017749875 0.104415541 PFN1P1  
1 171670517 171670939 - 423

|                                                  |                                            |                        |                |                       |             |        |
|--------------------------------------------------|--------------------------------------------|------------------------|----------------|-----------------------|-------------|--------|
| processed_pseudogene                             | profilin 1 pseudogene 1 [Source:HGNC       |                        |                |                       |             |        |
| Symbol;Acc:HGNC:42989]                           | -                                          | 17                     | 32             | 28                    | 49          | 62     |
| 86                                               | 1.968055029                                | 3.584561631            | 4.118361929    |                       |             |        |
| 6.43676652                                       | 9.009458358                                | 9.453423236            |                |                       |             |        |
| ENSG00000110700                                  | 6490.473411                                | 7618.038278            | 7698.019706    |                       |             |        |
| 8778.797026                                      | 9204.990102                                | 8728.18186             | 7268.843798    |                       |             |        |
| 8903.989663                                      | -0.2927758                                 | 0.017757789            | 0.104427369    |                       |             | RPS13  |
| 11                                               | 17074389                                   | 17077787               | -              | 2186                  |             |        |
| protein_coding                                   | ribosomal protein S13 [Source:HGNC         |                        |                |                       |             |        |
| Symbol;Acc:HGNC:10386]                           | -                                          | 7154                   | 8608           | 6622                  | 8474        | 8064   |
| 10118                                            | 160.2608573                                | 186.5857796            | 188.4715774    |                       |             |        |
| 215.4023047                                      | 226.7502224                                | 215.2164858            |                |                       |             |        |
| ENSG00000068394                                  | 348.3843709                                | 393.8228431            | 504.5213761    |                       |             |        |
| 549.0633023                                      | 690.602556                                 | 551.2263499            | 415.5761967    |                       |             |        |
| 596.9640694                                      | -0.523651516                               | 0.0177808              | 0.104527943    |                       |             | GPKOW  |
| X                                                | 49113389                                   | 49123801               | -              | 1742                  |             |        |
| protein_coding                                   | G-patch domain and KOW motifs [Source:HGNC |                        |                |                       |             |        |
| Symbol;Acc:HGNC:30677]                           | -                                          | 384                    | 445            | 434                   | 530         | 605    |
| 639                                              | 10.79472933                                | 12.1042616             | 15.50059701    |                       |             |        |
| 16.9059571                                       | 21.34787171                                | 17.05625678            |                |                       |             |        |
| ENSG00000186017                                  | 170.5631816                                | 242.488672             | 168.5612892    |                       |             |        |
| 339.7976663                                      | 243.1377594                                | 344.1929791            | 193.8710476    |                       |             |        |
| 309.0428016                                      | -0.672230488                               | 0.017832376            | 0.104768362    |                       |             | ZNF566 |
| 19                                               | 36445119                                   | 36489902               | -              | 6481                  |             |        |
| protein_coding                                   | zinc finger protein 566 [Source:HGNC       |                        |                |                       |             |        |
| Symbol;Acc:HGNC:25919]                           | zf-C2H2                                    | 188                    | 274            | 145                   | 328         | 213    |
| 399                                              | 1.420510706                                | 2.003249219            | 1.391979462    |                       |             |        |
| 2.812184861                                      | 2.02015616                                 | 2.862608077            |                |                       |             |        |
| ENSG00000163749                                  | 5.443505796                                | 13.2749273             | 4.6499666      |                       |             | 0      |
| 0                                                | 0                                          | 7.789466564            | 0              | 5.397205139           |             |        |
| 0.017833543                                      | 0.104768362                                | CCDC158 4              | 76312997       |                       |             |        |
| 76421868                                         | -                                          | 5860                   | protein_coding | coiled-coil domain    |             |        |
| containing 158 [Source:HGNC                      | Symbol;Acc:HGNC:26374]                     | -                      |                |                       |             | 6      |
| 15                                               | 4                                          | 0                      | 0              | 0                     | 0.050139768 |        |
| 0.121288628                                      | 0.042468725                                | 0                      | 0              | 0                     |             |        |
| ENSG00000166106                                  | 4.53625483                                 | 7.079961225            | 11.6249165     |                       |             | 0      |
| 0                                                | 0                                          | 7.747044185            | 0              | 5.383847108           |             |        |
| 0.017857861                                      | 1                                          | ADAMTS15               | 11             | 130448974             |             |        |
| 130476641                                        | +                                          | 5673                   | protein_coding | ADAM metallopeptidase |             |        |
| with thrombospondin type 1 motif 15 [Source:HGNC | Symbol;Acc:HGNC:16305]                     | -                      | 5              | 8                     | 10          | 0      |
| 0                                                | 0.043160444                                | 0.066819565            | 0.109671571    |                       |             | 0      |
| 0                                                | 0                                          |                        |                |                       |             |        |
| ENSG00000075213                                  | 247.6795137                                | 169.0340742            | 142.9864729    |                       |             |        |
| 269.3518087                                      | 386.9657298                                | 265.6928259            | 186.566687     |                       |             |        |
| 307.3367881                                      | -0.71671683                                | 0.017870724            | 0.104951936    |                       |             | SEMA3A |
| 7                                                | 83955777                                   | 84492724               | -              | 9371                  |             |        |
| protein_coding                                   | semaphorin 3A [Source:HGNC                 | Symbol;Acc:HGNC:10723] |                |                       |             |        |
| -                                                | 273                                        | 191                    | 123            | 260                   | 339         | 308    |
| 1.426610423                                      | 0.965770355                                | 0.816631297            | 1.541698514    |                       |             |        |

|                                      |                                     |                      |                       |                |      |        |
|--------------------------------------|-------------------------------------|----------------------|-----------------------|----------------|------|--------|
| 2.223622811                          | 1.528254899                         |                      |                       |                |      |        |
| ENSG00000138964                      | 13.60876449                         | 9.734946684          | 1.16249165            | 0              |      |        |
| 0                                    | 0                                   | 8.168734275          | 0                     | 5.467684048    |      |        |
| 0.017882419                          | 0.104985766                         | PARVG                | 22                    | 44172956       |      |        |
| 44219533                             | +                                   | 8656                 | protein_coding        | parvin gamma   |      |        |
| [Source:HGNC Symbol;Acc:HGNC:14654]  | -                                   |                      |                       | 15             | 11   | 1      |
| 0                                    | 0                                   | 0                    | 0.084859935           | 0.06021461     |      |        |
| 0.007187694                          | 0                                   | 0                    | 0                     |                |      |        |
| ENSG00000108852                      | 234.9780002                         | 184.963987           | 292.9478958           |                |      |        |
| 161.6110852                          | 152.959905                          | 109.5551588          | 237.629961            |                |      |        |
| 141.375383                           | 0.749568915                         | 0.017894393          | 0.105021206           |                |      | MPP2   |
| 17                                   | 43875357                            | 43909711             | -                     | 6114           |      |        |
| protein_coding                       | membrane palmitoylated protein 2    | [Source:HGNC         |                       |                |      |        |
| Symbol;Acc:HGNC:7220]                | -                                   | 259                  | 209                   | 252            | 156  | 134    |
| 127                                  | 2.074450199                         | 1.619747404          | 2.564377472           |                |      |        |
| 1.417787711                          | 1.347183404                         | 0.965849156          |                       |                |      |        |
| ENSG00000124209                      | 2861.469547                         | 2743.484975          | 2597.006346           |                |      |        |
| 3464.278647                          | 3032.943787                         | 3788.710687          | 2733.986956           |                |      |        |
| 3428.644374                          | -0.32677912                         | 0.017913261          | 0.105097074           |                |      | RAB22A |
| 20                                   | 58309696                            | 58367507             | +                     | 9285           |      |        |
| protein_coding                       | "RAB22A, member RAS oncogene family | [Source:HGNC         |                       |                |      |        |
| Symbol;Acc:HGNC:9764]"               | -                                   | 3154                 | 3100                  | 2234           | 3344 | 2657   |
| 4392                                 | 16.63445071                         | 15.8199908           | 14.96952801           |                |      |        |
| 20.01227234                          | 17.58964225                         | 21.99436569          |                       |                |      |        |
| ENSG00000257698                      | 127.9223862                         | 137.1742487          | 195.2985972           |                |      |        |
| 75.62570013                          | 75.33846066                         | 99.20349021          | 153.4650774           |                |      |        |
| 83.389217                            | 0.875168625                         | 0.017928045          | 0.105148932           |                |      |        |
| AC084033.3                           | 12                                  | 57931528             | 57936175              | -              |      | 1312   |
| lincRNA uncharacterized LOC100506844 | [Source:NCBI                        |                      |                       |                |      |        |
| gene;Acc:100506844]                  | -                                   | 141                  | 155                   | 168            | 73   | 66     |
| 115                                  | 5.262764799                         | 5.597889275          | 7.966770257           |                |      |        |
| 3.091726502                          | 3.092127981                         | 4.075632563          |                       |                |      |        |
| ENSG00000232491                      | 0                                   | 0                    | 0                     | 35.36820086    |      |        |
| 0                                    | 11.78940029                         | -6.040135386         | 0.017961818           |                |      |        |
| 0.105312098                          | SAPCD2P3                            | 7                    | 66556216              | 66557065       |      |        |
| +                                    | 850                                 | processed_pseudogene | suppressor APC domain |                |      |        |
| containing 2 pseudogene 3            | [Source:HGNC Symbol;Acc:HGNC:51279] | -                    |                       |                |      |        |
| 0                                    | 0                                   | 0                    | 0                     | 41             | 0    | 0      |
| 0                                    | 0                                   | 0                    | 2.242827896           |                |      |        |
| ENSG00000005961                      | 6.350756762                         | 0                    | 5.812458249           | 20.7193699     |      |        |
| 25.11282022                          | 29.32972754                         | 4.054405004          | 25.05397255           |                |      |        |
| -2.643954138                         | 0.017995817                         | 0.105476474          | ITGA2B                | 17             |      |        |
| 44372180                             | 44389505                            | -                    | 5551                  | protein_coding |      |        |
| integrin subunit alpha 2b            | [Source:HGNC Symbol;Acc:HGNC:6138]  |                      |                       |                |      |        |
| -                                    | 7                                   | 0                    | 5                     | 20             | 22   | 34     |
| 0.061752635                          | 0                                   | 0.056040967          | 0.200203106           | 0.243612077    |      |        |
| 0.284799162                          |                                     |                      |                       |                |      |        |
| ENSG00000276045                      | 762.9980624                         | 863.7552694          | 886.9811289           |                |      |        |
| 931.3356769                          | 1318.423062                         | 1135.232984          | 837.9114869           |                |      |        |
| 1128.330574                          | -0.429361071                        | 0.018006816          | 0.105505987           |                |      | ORAI1  |



|                                     |                                                        |             |             |             |             |
|-------------------------------------|--------------------------------------------------------|-------------|-------------|-------------|-------------|
| 12                                  | 121626550                                              | 121642677   | +           | 2262        |             |
| protein_coding                      | ORAI calcium release-activated calcium modulator 1     |             |             |             |             |
| [Source:HGNC Symbol;Acc:HGNC:25896] |                                                        | -           | 841         | 976         | 763         |
| 899                                 | 1155                                                   | 1316        | 18.20673532 | 20.44483726 |             |
| 20.98644048                         | 22.084071                                              |             | 31.38605589 | 27.05168407 |             |
| ENSG0000083807                      | 119.7571275                                            |             | 162.8391082 | 173.2112558 |             |
| 89.09329056                         | 98.16829722                                            |             | 31.05500563 | 151.9358305 |             |
| 72.7721978                          | 1.067294476                                            |             | 0.018036883 | 0.105632933 |             |
| SLC27A5                             | 19                                                     | 58479512    | 58512413    | -           | 8025        |
| protein_coding                      | solute carrier family 27 member 5 [Source:HGNC         |             |             |             |             |
| Symbol;Acc:HGNC:10999]              |                                                        | -           | 132         | 184         | 149         |
| 36                                  | 0.805485216                                            |             | 1.086423679 | 1.155175778 |             |
| 0.595477634                         | 0.65871988                                             |             | 0.208587596 |             |             |
| ENSG00000132670                     | 1625.793731                                            |             | 1443.427095 | 1926.248664 |             |
| 1329.147579                         | 1312.715602                                            |             | 1193.892439 | 1665.156497 |             |
| 1278.585207                         | 0.380729784                                            |             | 0.018040426 | 0.105632933 | PTPRA       |
| 20                                  | 2864184                                                | 3039076     | +           | 4469        |             |
| protein_coding                      | "protein tyrosine phosphatase, receptor type A         |             |             |             |             |
| [Source:HGNC Symbol;Acc:HGNC:9664]" |                                                        | -           | 1792        | 1631        | 1657        |
| 1283                                | 1150                                                   | 1384        | 19.63614969 | 17.29298828 |             |
| 23.06848111                         | 15.95248502                                            |             | 15.81739084 | 14.39980973 |             |
| ENSG00000255139                     | 4.53625483                                             |             | 0           | 3.48747495  | 3.107905485 |
|                                     | 35.38624667                                            | 29.32972754 |             | 2.674576593 | 22.6079599  |
|                                     | -3.09218908                                            | 0.018083441 |             | 0.105818643 | AP000442.2  |
| 11                                  | 59616429                                               |             | 59639861    | +           | 760         |
| antisense                           | novel transcript                                       |             |             |             |             |
| 3                                   | 31                                                     | 34          | 0.322169999 | 0           | 0.245592166 |
|                                     | 0.219340943                                            | 2.507237425 |             | 2.080158093 |             |
| ENSG00000135454                     | 222.2764867                                            |             | 231.8687301 | 282.4854709 |             |
| 189.5822346                         | 136.9790194                                            |             | 122.4947444 | 245.5435626 |             |
| 149.6853328                         | 0.713950202                                            |             | 0.018084106 | 0.105818643 |             |
| B4GALNT1                            | 12                                                     | 57623410    | 57633355    | -           | 8003        |
| protein_coding                      | "beta-1,4-N-acetyl-galactosaminyltransferase 1         |             |             |             |             |
| [Source:HGNC Symbol;Acc:HGNC:4117]" |                                                        | -           | 245         | 262         | 243         |
| 183                                 | 120                                                    | 142         | 1.499139168 | 1.551225428 |             |
| 1.889123295                         | 1.270604288                                            |             | 0.921670717 | 0.82502393  |             |
| ENSG00000255201                     | 0                                                      | 3.539980612 |             | 1.16249165  | 9.323716454 |
|                                     | 19.40536108                                            | 19.84069804 |             | 1.567490754 | 16.18992519 |
|                                     | -3.352753175                                           | 0.018126723 |             | 0.105994539 | AC087623.1  |
| 8                                   | 38421889                                               |             | 38426096    | +           | 534         |
| antisense                           | novel transcript                                       |             |             |             |             |
| 9                                   | 17                                                     | 23          | 0           | 0.354932015 | 0.11651064  |
|                                     | 0.936511891                                            | 1.956838681 |             | 2.002707836 |             |
| ENSG00000111785                     | 550.7013363                                            |             | 533.6520773 | 524.2837341 |             |
| 679.5953327                         | 757.9505739                                            |             | 715.9904076 | 536.2123826 |             |
| 717.845438                          | -0.420467272                                           |             | 0.018127555 | 0.105994539 | RIC8B       |
| 12                                  | 106774595                                              |             | 106889316   | +           | 7795        |
| protein_coding                      | RIC8 guanine nucleotide exchange factor B [Source:HGNC |             |             |             |             |
| Symbol;Acc:HGNC:25555]              |                                                        | -           | 607         | 603         | 451         |
| 830                                 | 3.813302473                                            |             | 3.665452817 | 3.599707965 | 656         |
|                                     |                                                        |             |             |             | 664         |

|                                     |                                                        |             |             |             |        |             |
|-------------------------------------|--------------------------------------------------------|-------------|-------------|-------------|--------|-------------|
| 4.67627199                          | 5.235996168                                            | 4.951000737 |             |             |        |             |
| ENSG00000077380                     | 1967.827345                                            | 1654.940936 | 2416.82014  |             |        |             |
| 1668.945245                         | 1602.654527                                            | 1188.716604 | 2013.196141 |             |        |             |
| 1486.772125                         | 0.437331309                                            | 0.018133803 | 0.105994539 |             |        |             |
| DYNC1I2 2                           | 171687409                                              | 171748420   | +           | 4695        |        |             |
| protein_coding                      | dynein cytoplasmic 1 intermediate chain 2 [Source:HGNC |             |             |             |        |             |
| Symbol;Acc:HGNC:2964]               | -                                                      | 2169        | 1870        | 2079        | 1611   | 1404        |
| 1378                                | 22.62312728                                            | 18.87263109 | 27.55026238 |             |        |             |
| 19.06654433                         | 18.38141208                                            | 13.64723403 |             |             |        |             |
| ENSG00000126461                     | 4050.875563                                            | 5145.36182  | 5031.263861 |             |        |             |
| 4627.671267                         | 6394.637221                                            | 8261.494137 | 4742.500415 |             |        |             |
| 6427.934208                         | -0.438913631                                           | 0.018138135 | 0.105994539 |             |        | SCAF1       |
| 19                                  | 49642125                                               | 49658642    | +           | 4548        |        |             |
| protein_coding                      | SR-related CTD associated factor 1 [Source:HGNC        |             |             |             |        |             |
| Symbol;Acc:HGNC:30403]              | -                                                      | 4465        | 5814        | 4328        | 4467   | 5602        |
| 9577                                | 48.07615102                                            | 60.57326901 | 59.20707997 |             |        |             |
| 54.57673365                         | 75.71292224                                            | 97.91293061 |             |             |        |             |
| ENSG00000196792                     | 413.7064405                                            | 392.0528528 | 406.8720775 |             |        |             |
| 251.7403443                         | 309.3442854                                            | 279.4950507 | 404.2104569 |             |        |             |
| 280.1932268                         | 0.52913169                                             | 0.018170626 | 0.106149343 |             |        | STRN3       |
| 14                                  | 30893799                                               | 31026401    | -           | 4965        |        |             |
| protein_coding                      | striatin 3 [Source:HGNC Symbol;Acc:HGNC:15720] -       |             |             |             |        |             |
| 456                                 | 443                                                    | 350         | 243         | 271         | 324    | 4.497532117 |
| 4.227765731                         | 4.385868822                                            | 2.719562627 | 3.355037651 |             |        |             |
| 3.034287832                         |                                                        |             |             |             |        |             |
| ENSG00000198522                     | 948.9845104                                            | 1108.013932 | 1172.954075 |             |        |             |
| 1138.529376                         | 1577.541707                                            | 1632.975713 | 1076.650839 |             |        |             |
| 1449.682265                         | -0.429775744                                           | 0.018204014 | 0.106309277 |             |        | GPN1        |
| 2                                   | 27628247                                               | 27651508    | +           | 3746        |        |             |
| protein_coding                      | GPN-loop GTPase 1 [Source:HGNC Symbol;Acc:HGNC:17030]  |             |             |             |        |             |
| -                                   | 1046                                                   | 1252        | 1009        | 1099        | 1382   | 1893        |
| 13.67390616                         | 15.83663826                                            | 16.75831077 | 16.30204032 |             |        |             |
| 22.67710601                         | 23.49707803                                            |             |             |             |        |             |
| ENSG00000057704                     | 31.75378381                                            | 58.40968011 | 27.8997996  |             |        |             |
| 101.5249125                         | 73.055477                                              | 94.02765594 | 39.35442117 |             |        |             |
| 89.53601515                         | -1.181337778                                           | 0.018245768 | 0.106517949 |             |        | TMCC3       |
| 12                                  | 94567124                                               | 94650562    | -           | 6515        |        |             |
| protein_coding                      | transmembrane and coiled-coil domain family 3          |             |             |             |        |             |
| [Source:HGNC Symbol;Acc:HGNC:29199] | -                                                      |             | 35          | 66          |        | 24          |
| 98                                  | 64                                                     | 109         | 0.263076653 | 0.480016268 |        |             |
| 0.229194224                         | 0.835841055                                            | 0.603827536 | 0.777934615 |             |        |             |
| ENSG00000279852                     | 9.979760626                                            | 9.734946684 | 3.48747495  |             |        | 0           |
| 0                                   | 0                                                      | 7.734060753 | 0           | 5.387506653 |        |             |
| 0.018251836                         | 1                                                      | AC083964.2  | 8           | 486117      | 488512 | -           |
| 2396                                | TEC                                                    | TEC         | -           | 11          | 11     | 3           |
| 0                                   | 0                                                      | 0.224819799 | 0.217536588 | 0.077900687 |        | 0           |
| 0                                   | 0                                                      | 0           |             |             |        |             |
| ENSG00000174804                     | 151.5109113                                            | 137.1742487 | 132.5240481 |             |        |             |
| 75.62570013                         | 77.62144432                                            | 81.9507093  | 140.4030694 |             |        |             |
| 78.39928458                         | 0.840605736                                            | 0.018268496 | 0.106615448 |             |        | FZD4        |

|                                     |                                                      |             |             |             |        |
|-------------------------------------|------------------------------------------------------|-------------|-------------|-------------|--------|
| 11                                  | 86945679                                             | 86955391    | -           | 7383        |        |
| protein_coding                      | frizzled class receptor 4 [Source:HGNC               |             |             |             |        |
| Symbol;Acc:HGNC:4042]               | -                                                    | 167         | 155         | 114         | 73     |
| 95                                  | 1.107674828                                          | 0.994775935 | 0.960680177 |             | 68     |
| 0.549416927                         | 0.566139432                                          | 0.598303791 |             |             |        |
| ENSG0000099957                      | 92.53959853                                          | 111.5093893 | 79.04943219 |             |        |
| 72.51779464                         | 10.27342645                                          | 12.07694663 | 94.36614001 |             |        |
| 31.62272258                         | 1.579789664                                          | 0.018276782 | 0.106628627 |             | P2RX6  |
| 22                                  | 21009808                                             | 21028830    | +           | 4730        |        |
| protein_coding                      | purinergic receptor P2X 6 [Source:HGNC               |             |             |             |        |
| Symbol;Acc:HGNC:8538]               | -                                                    | 102         | 126         | 68          | 70     |
| 14                                  | 1.056009231                                          | 1.26222229  | 0.894447014 |             | 9      |
| 0.822335318                         | 0.116957676                                          | 0.137625184 |             |             |        |
| ENSG00000167987                     | 949.8917614                                          | 1154.918675 | 1009.042752 |             |        |
| 1274.241249                         | 1291.027258                                          | 1490.64027  | 1037.951063 |             |        |
| 1351.969592                         | -0.381518077                                         | 0.01833813  | 0.106951262 |             | VPS37C |
| 11                                  | 61130256                                             | 61161617    | -           | 3960        |        |
| protein_coding                      | "VPS37C, ESCRT-I subunit [Source:HGNC                |             |             |             |        |
| Symbol;Acc:HGNC:26097]"             | -                                                    | 1047        | 1305        | 868         | 1230   |
| 1728                                | 12.94732886                                          | 15.61499202 | 13.63739393 |             | 1131   |
| 17.25925197                         | 17.55556371                                          | 20.28988429 |             |             |        |
| ENSG00000101868                     | 1061.48363                                           | 902.6950562 | 866.0562792 |             |        |
| 928.2277714                         | 507.9638635                                          | 439.083274  | 943.4116552 |             |        |
| 625.0916363                         | 0.594578952                                          | 0.018359327 | 0.107039599 |             | POLA1  |
| X                                   | 24693919                                             | 24996986    | +           | 6336        |        |
| protein_coding                      | "DNA polymerase alpha 1, catalytic subunit           |             |             |             |        |
| [Source:HGNC Symbol;Acc:HGNC:9173]" | -                                                    |             | 1170        | 1020        | 745    |
| 896                                 | 445                                                  | 509         | 9.042726105 | 7.628013342 |        |
| 7.315566303                         | 7.857870816                                          | 4.317100934 | 3.735370046 |             |        |
| ENSG00000185053                     | 1906.13428                                           | 1671.755844 | 1186.903975 |             |        |
| 2157.922375                         | 2078.656619                                          | 2132.44372  | 1588.264699 |             |        |
| 2123.007571                         | -0.417815273                                         | 0.018377963 | 0.107112945 |             | SGCZ   |
| 8                                   | 14089864                                             | 15238339    | -           | 2234        |        |
| protein_coding                      | sarcoglycan zeta [Source:HGNC Symbol;Acc:HGNC:14075] |             |             |             |        |
| -                                   | 2101                                                 | 1889        | 1021        | 2083        | 1821   |
| 46.0544465                          | 40.06593019                                          | 28.43475037 | 51.81054311 |             |        |
| 50.10420057                         | 51.45129566                                          |             |             |             |        |
| ENSG00000128191                     | 1453.416047                                          | 2029.293886 | 1340.352872 |             |        |
| 1892.71444                          | 2078.656619                                          | 2572.389633 | 1607.687602 |             |        |
| 2181.253564                         | -0.439916091                                         | 0.018402769 | 0.107126019 |             | DGCR8  |
| 22                                  | 20080232                                             | 20111877    | +           | 7315        |        |
| protein_coding                      | "DGCR8, microprocessor complex subunit [Source:HGNC  |             |             |             |        |
| Symbol;Acc:HGNC:2847]"              | -                                                    | 1602        | 2293        | 1153        | 1827   |
| 2982                                | 10.72449534                                          | 14.85306786 | 9.80667592  |             | 1821   |
| 13.87829966                         | 15.301816                                            | 18.95502348 |             |             |        |
| ENSG00000177728                     | 1457.952302                                          | 1240.763205 | 1231.078657 |             |        |
| 1048.400117                         | 1036.47458                                           | 952.353506  | 1309.931388 |             |        |
| 1012.409401                         | 0.372325541                                          | 0.018403465 | 0.107126019 |             | TMEM94 |
| 17                                  | 75441159                                             | 75500090    | +           | 8854        |        |
| protein_coding                      | transmembrane protein 94 [Source:HGNC                |             |             |             |        |

|                                                     |                                                   |             |             |              |      |           |
|-----------------------------------------------------|---------------------------------------------------|-------------|-------------|--------------|------|-----------|
| Symbol;Acc:HGNC:28983]                              | -                                                 | 1607        | 1402        | 1059         | 1012 | 908       |
| 1104                                                | 8.888020399                                       | 7.502999834 | 7.441548028 |              |      |           |
| 6.351159777                                         | 6.303673215                                       | 5.797764542 |             |              |      |           |
| ENSG00000139631                                     | 45.3625483                                        | 76.99457832 | 53.4746159  |              |      |           |
| 149.1794633                                         | 101.5927727                                       | 103.5166854 | 58.61058084 |              |      |           |
| 118.0963071                                         | -1.008749874                                      | 0.018403476 | 0.107126019 |              |      | CSAD      |
| 12                                                  | 53157663                                          | 53180909    | -           | 4390         |      |           |
| protein_coding                                      | cysteine sulfinic acid decarboxylase [Source:HGNC |             |             |              |      |           |
| Symbol;Acc:HGNC:18966]                              | -                                                 | 50          | 87          | 46           | 144  | 89        |
| 120                                                 | 0.55774305                                        | 0.939033689 | 0.651928786 |              |      |           |
| 1.822678268                                         | 1.246157245                                       | 1.271006419 |             |              |      |           |
| ENSG00000166133                                     | 316.6305871                                       | 318.5982551 | 349.9099866 |              |      |           |
| 317.0063594                                         | 597.0002261                                       | 605.5726098 | 328.3796096 |              |      |           |
| 506.5263985                                         | -0.626056184                                      | 0.018404431 | 0.107126019 |              |      | RPUSD2    |
| 15                                                  | 40569300                                          | 40574943    | +           | 2482         |      |           |
| protein_coding                                      | RNA pseudouridylate synthase domain containing 2  |             |             |              |      |           |
| [Source:HGNC Symbol;Acc:HGNC:24180]                 | -                                                 |             | 349         | 360          |      | 301       |
| 306                                                 | 523                                               | 702         | 6.885767164 | 6.872696479  |      |           |
| 7.545214055                                         | 6.850648628                                       | 12.95231124 | 13.15122939 |              |      |           |
| ENSG00000251350                                     | 31.75378381                                       | 15.0449176  | 19.76235805 |              |      |           |
| 7.251779464                                         | 0                                                 | 0           | 22.18701982 | 2.417259821  |      |           |
| 3.20896696                                          | 0.018410984                                       | 0.107128914 | LINC02475   |              |      | 4         |
| 44016861                                            | 44022063                                          | +           | 2823        | lincRNA long |      |           |
| intergenic non-protein coding RNA 2475 [Source:HGNC |                                                   |             |             |              |      |           |
| Symbol;Acc:HGNC:53418]                              | -                                                 | 35          | 17          | 17           | 7    | 0         |
| 0                                                   | 0.607135811                                       | 0.2853412   | 0.374666523 |              |      |           |
| 0.137784132                                         | 0                                                 | 0           |             |              |      |           |
| ENSG00000183562                                     | 0.907250966                                       | 0           | 0           | 18.64743291  |      |           |
| 4.565967313                                         | 6.038473317                                       | 0.302416989 |             |              |      |           |
| 9.750624513                                         | -4.799264416                                      | 0.018426235 | 0.107164429 |              |      |           |
| AC131971.1                                          | 11                                                | 2989863     | 2991344     | +            | 1482 | antisense |
| "novel transcript, antisense to NAP1L4"             | -                                                 |             |             |              | 1    | 0         |
| 0                                                   | 18                                                | 4           | 7           | 0.033043077  | 0    | 0         |
| 0.674895209                                         | 0.165904875                                       | 0.219624535 |             |              |      |           |
| ENSG00000106511                                     | 301.2073207                                       | 304.4383327 | 270.8605544 |              |      |           |
| 224.8051634                                         | 130.1300684                                       | 193.2311461 | 292.1687359 |              |      |           |
| 182.722126                                          | 0.675957237                                       | 0.018429204 | 0.107164429 |              |      | MEOX2     |
| 7                                                   | 15611212                                          | 15686812    | -           | 2500         |      |           |
| protein_coding                                      | mesenchyme homeobox 2 [Source:HGNC                |             |             |              |      |           |
| Symbol;Acc:HGNC:7014]                               | Homeobox                                          | 332         | 344         | 233          | 217  |           |
| 114                                                 | 224                                               | 6.50319473  | 6.51995915  | 5.798594763  |      |           |
| 4.823161107                                         | 2.802929684                                       | 4.166189574 |             |              |      |           |
| ENSG00000196453                                     | 501.7097842                                       | 528.3421064 | 576.5958583 |              |      |           |
| 613.293349                                          | 690.602556                                        | 977.3700383 | 535.5492496 |              |      |           |
| 760.4219811                                         | -0.507438687                                      | 0.018438444 | 0.107182924 |              |      | ZNF777    |
| 7                                                   | 149431363                                         | 149461123   | -           | 3233         |      |           |
| protein_coding                                      | zinc finger protein 777 [Source:HGNC              |             |             |              |      |           |
| Symbol;Acc:HGNC:22213]                              | zf-C2H2                                           | 553         | 597         | 496          | 592  | 605       |
| 1133                                                | 8.37622067                                        | 8.749738373 | 9.545151338 |              |      |           |
| 10.17485071                                         | 11.50262682                                       | 16.29503221 |             |              |      |           |

|                        |                                                  |             |             |             |
|------------------------|--------------------------------------------------|-------------|-------------|-------------|
| ENSG00000141556        | 2334.356735                                      | 2272.667553 | 2705.118069 |             |
| 1875.102976            | 1808.123056                                      | 2094.487602 | 2437.380786 |             |
| 1925.904545            | 0.339043271                                      | 0.018477729 | 0.107376004 | TBCD        |
| 17                     | 82752064                                         | 82945922    | + 13546     |             |
| protein_coding         | tubulin folding cofactor D [Source:HGNC          |             |             |             |
| Symbol;Acc:HGNC:11581] | -                                                | 2573 2568   | 2327 1810   | 1584        |
| 2428                   | 9.301594411                                      | 8.982772256 | 10.68789451 |             |
| 7.424710888            | 7.187725222                                      | 8.334290406 |             |             |
| ENSG00000074416        | 2396.957052                                      | 2585.955837 | 2556.319138 |             |
| 3179.387311            | 3074.037493                                      | 3011.472907 | 2513.077343 |             |
| 3088.299237            | -0.297367245                                     | 0.018556887 | 0.107800582 | MGLL        |
| 3                      | 127689062                                        | 128052190   | - 11849     |             |
| protein_coding         | monoglyceride lipase [Source:HGNC                |             |             |             |
| Symbol;Acc:HGNC:17038] | -                                                | 2642 2922   | 2199 3069   | 2693        |
| 3491                   | 10.91892285                                      | 11.68489873 | 11.54650044 |             |
| 14.39220156            | 13.97018039                                      | 13.69932495 |             |             |
| ENSG00000163728        | 617.8379078                                      | 647.8164521 | 362.6973948 |             |
| 805.983489             | 778.4974268                                      | 777.2377798 | 542.7839182 |             |
| 787.2395652            | -0.534312297                                     | 0.018564802 | 0.107811159 | TTC14       |
| 3                      | 180602130                                        | 180617828   | + 7783      |             |
| protein_coding         | tetratricopeptide repeat domain 14 [Source:HGNC  |             |             |             |
| Symbol;Acc:HGNC:24697] | -                                                | 681 732     | 312 778     | 682         |
| 901                    | 4.284782337                                      | 4.456464912 | 2.494103146 |             |
| 5.554495384            | 5.386227643                                      | 5.38280663  |             |             |
| ENSG00000168395        | 679.5309735                                      | 778.7957347 | 588.2207748 |             |
| 391.5960911            | 522.8032573                                      | 536.5614862 | 682.1824944 |             |
| 483.6536115            | 0.496702916                                      | 0.018583876 | 0.107886507 | ING5        |
| 2                      | 241687085                                        | 241729478   | + 10259     |             |
| protein_coding         | inhibitor of growth family member 5 [Source:HGNC |             |             |             |
| Symbol;Acc:HGNC:19421] | -                                                | 749 880     | 506 378     | 458         |
| 622                    | 3.57524223                                       | 4.064471505 | 3.068685164 |             |
| 2.047381684            | 2.744149756                                      | 2.819138243 |             |             |
| ENSG00000108639        | 1041.524109                                      | 1254.038132 | 981.1429525 |             |
| 1259.73769             | 1515.901148                                      | 1536.36014  | 1092.235064 |             |
| 1437.332992            | -0.395587142                                     | 0.018602853 | 0.107961242 | SYNGR2      |
| 17                     | 78168558                                         | 78173527    | + 4074      |             |
| protein_coding         | synaptogyrin 2 [Source:HGNC                      |             |             |             |
| Symbol;Acc:HGNC:11499] | -                                                | 844 1216    | 1328 1781   |             |
| 13.7990614             | 16.48068529                                      | 12.88926844 | 16.58534821 |             |
| 20.03661764            | 20.32702929                                      |             |             |             |
| ENSG00000204520        | 1153.115978                                      | 1372.627482 | 1233.403641 |             |
| 1058.759802            | 905.2030197                                      | 922.1611394 | 1253.049034 |             |
| 962.0413203            | 0.381424468                                      | 0.018643899 | 0.108163965 | MICA        |
| 6                      | 31399784                                         | 31415315    | + 2386      |             |
| protein_coding         | MHC class I polypeptide-related sequence A       |             |             |             |
| [Source:HGNC           | Symbol;Acc:HGNC:7090]                            | -           | 1271 1551   | 1061        |
| 1022                   | 793 1069                                         | 26.08577805 | 30.80121153 |             |
| 27.66634518            | 23.8008518                                       | 20.42914111 | 20.83235099 |             |
| ENSG00000174502        | 9.07250966                                       | 3.539980612 | 10.46242485 | 0           |
| 0                      | 0                                                | 7.691638374 | 0           | 5.374078258 |

|                                                              |                                                   |                |             |                          |             |                |
|--------------------------------------------------------------|---------------------------------------------------|----------------|-------------|--------------------------|-------------|----------------|
| 0.018680111                                                  | 1                                                 | SLC26A9        | 1           | 205913048                | 205943460   |                |
| -                                                            | 5628                                              | protein_coding |             | solute carrier family 26 |             |                |
| member 9 [Source:HGNC Symbol;Acc:HGNC:14469]                 | -                                                 |                |             | 10                       | 4           |                |
| 9                                                            | 0                                                 | 0              | 0           | 0.087011087              | 0.033676918 |                |
| 0.099493628                                                  | 0                                                 | 0              | 0           |                          |             |                |
| ENSG00000181191                                              | 522.5765564                                       | 559.3169368    |             | 649.8328323              |             |                |
| 693.0629231                                                  | 824.1570999                                       | 832.4466787    |             | 577.2421085              |             |                |
| 783.2222339                                                  | -0.441440517                                      | 0.018688975    |             | 0.108389926              |             | PJA1           |
| X                                                            | 69160851                                          | 69165793       |             | -                        | 3117        |                |
| protein_coding                                               | praja ring finger ubiquitin ligase 1 [Source:HGNC |                |             |                          |             |                |
| Symbol;Acc:HGNC:16648]                                       | -                                                 | 576            | 632         | 559                      | 669         | 722            |
| 965                                                          | 9.049287053                                       | 9.607418673    |             | 11.15788426              |             |                |
| 11.92617998                                                  | 14.23795957                                       | 14.39532682    |             |                          |             |                |
| ENSG00000253616                                              | 9.07250966                                        | 34.51481097    |             | 52.31212425              |             |                |
| 4.14387398                                                   | 11.41491828                                       | 0              | 31.96648163 | 5.186264087              |             |                |
| 2.649626915                                                  | 0.01869739                                        | 0.108403187    |             | AC107959.3               |             |                |
| 8                                                            | 23071377                                          | 23074488       |             | -                        | 881         |                |
| antisense                                                    | novel transcript                                  |                |             | -                        | 10          | 39             |
| 4                                                            | 10                                                | 0              | 0.555843812 | 2.097563607              |             | 45             |
| 3.177923598                                                  | 0.252287729                                       | 0.697704384    |             | 0                        |             |                |
| ENSG00000108509                                              | 749.3892979                                       | 990.3095763    |             | 813.7441549              |             |                |
| 1009.033314                                                  | 1088.983204                                       | 1363.832331    |             | 851.1476764              |             |                |
| 1153.949616                                                  | -0.439393184                                      | 0.01871293     |             | 0.108425027              |             | CAMTA2         |
| 17                                                           | 4967992                                           | 4987652        | -           | 5999                     |             | protein_coding |
| calmodulin binding transcription activator 2 [Source:HGNC    |                                                   |                |             |                          |             |                |
| Symbol;Acc:HGNC:18807]                                       | CG-1                                              | 826            | 1119        | 700                      | 974         | 954            |
| 1581                                                         | 6.74263839                                        | 8.838481667    |             | 7.259822871              |             |                |
| 9.021778051                                                  | 9.775002406                                       | 12.25417353    |             |                          |             |                |
| ENSG00000108829                                              | 6361.643773                                       | 6541.884172    |             | 6834.28841               |             |                |
| 7163.722142                                                  | 8193.628343                                       | 8990.42413     |             | 6579.272118              |             |                |
| 8115.924872                                                  | -0.302976377                                      | 0.018713415    |             | 0.108425027              |             | LRRC59         |
| 17                                                           | 50375059                                          | 50397553       |             | -                        | 4570        |                |
| protein_coding                                               | leucine rich repeat containing 59 [Source:HGNC    |                |             |                          |             |                |
| Symbol;Acc:HGNC:28817]                                       | -                                                 | 7012           | 7392        | 5879                     | 6915        | 7178           |
| 10422                                                        | 75.13709341                                       | 76.64294762    |             | 80.03760908              |             |                |
| 84.07909492                                                  | 96.54607312                                       | 106.0390643    |             |                          |             |                |
| ENSG00000233913                                              | 3103.705555                                       | 3803.709168    |             | 4175.670006              |             |                |
| 4605.915928                                                  | 4516.883164                                       | 4850.619352    |             | 3694.361576              |             |                |
| 4657.806148                                                  | -0.33468858                                       | 0.018728078    |             | 0.108474449              |             |                |
| RPL10P9                                                      | 5                                                 | 168616352      | 168616996   | +                        | 645         |                |
| processed_pseudogene                                         | ribosomal protein L10 pseudogene 9                |                |             |                          |             |                |
| [Source:HGNC Symbol;Acc:HGNC:35579]                          | -                                                 |                |             | 3421                     | 4298        | 3592           |
| 4446                                                         | 3957                                              | 5623           | 259.7299567 | 315.7425684              |             |                |
| 346.4842198                                                  | 383.0202958                                       | 377.097537     |             | 405.3585959              |             |                |
| ENSG00000132286                                              | 697.6759928                                       | 792.070662     |             | 551.021042               |             |                |
| 994.5297551                                                  | 807.0347225                                       | 1006.699766    |             | 680.255899               |             |                |
| 936.0880812                                                  | -0.459763638                                      | 0.018748892    |             | 0.108559462              |             |                |
| TIMM10B                                                      | 11                                                | 6481447        | 6484679     | +                        | 3041        | protein_coding |
| translocase of inner mitochondrial membrane 10B [Source:HGNC |                                                   |                |             |                          |             |                |
| Symbol;Acc:HGNC:4022]                                        | -                                                 | 769            | 895         | 474                      | 960         | 707            |

|                              |                                                   |                                     |             |             |
|------------------------------|---------------------------------------------------|-------------------------------------|-------------|-------------|
| 1167                         | 12.38336298                                       | 13.9454668                          | 9.697700516 |             |
| 17.5415052                   | 14.2905964                                        | 17.84372223                         |             |             |
| ENSG00000260123              | 12.70151352                                       | 15.0449176                          | 9.299933199 |             |
| 2.07193699                   | 0                                                 | 0                                   | 12.34878811 | 0.690645663 |
| 4.182528984                  | 0.018758859                                       | 0.108581626                         | AC013565.1  | 15          |
| 89041223                     | 89082819                                          | +                                   | 597         | lincRNA     |
| uncharacterized LOC102724566 | [Source:NCBI gene;Acc:102724566]                  |                                     |             | -           |
| 14                           | 17                                                | 8                                   | 2           | 0           |
| 1.349276732                  | 0.833724382                                       | 0.186152001                         | 0           | 1.148371453 |
| ENSG00000173559              | 533.463568                                        | 408.8677607                         | 237.1482966 |             |
| 643.3364353                  | 502.2564044                                       | 701.3255438                         | 393.1598751 |             |
| 615.6394612                  | -0.645334499                                      | 0.01876681                          | 0.108592119 | NABP1       |
| 2                            | 191678068                                         | 191696659                           | +           | 13806       |
| protein_coding               | nucleic acid binding protein 1                    | [Source:HGNC Symbol;Acc:HGNC:26232] |             |             |
| 813                          | 2.085634204                                       | 1.585625229                         | 0.919325158 | 440         |
| 2.499400053                  | 1.958989768                                       | 2.738127674                         |             |             |
| ENSG00000167635              | 2511.270674                                       | 2334.617214                         | 2206.409151 |             |
| 2119.591541                  | 1659.729118                                       | 1744.25615                          | 2350.76568  |             |
| 1841.192269                  | 0.352667117                                       | 0.018801431                         | 0.108756873 | ZNF146      |
| 19                           | 36214602                                          | 36238774                            | +           | 4146        |
| protein_coding               | zinc finger protein 146                           | [Source:HGNC Symbol;Acc:HGNC:12931] |             |             |
| 2022                         | 32.69380527                                       | 30.14893214                         | 28.48221477 | 1454        |
| 27.42132116                  | 21.55670949                                       | 22.67685753                         |             |             |
| ENSG00000088448              | 1652.104009                                       | 1776.185272                         | 1300.828156 |             |
| 2201.433052                  | 2052.402307                                       | 1895.217982                         | 1576.372479 |             |
| 2049.684447                  | -0.377855551                                      | 0.01881268                          | 0.108786369 |             |
| ANKRD10 13                   | 110878540                                         | 110915069                           | -           | 4563        |
| protein_coding               | ankyrin repeat domain 10                          | [Source:HGNC Symbol;Acc:HGNC:20265] |             |             |
| 2197                         | 19.54286179                                       | 20.84122991                         | 15.25760841 | 1798        |
| 25.87739227                  | 24.22069377                                       | 22.38775813                         |             |             |
| ENSG00000064933              | 520.7620545                                       | 418.6027074                         | 452.2092518 |             |
| 341.8696033                  | 365.277385                                        | 195.8190633                         | 463.8580046 |             |
| 300.9886839                  | 0.626629821                                       | 0.018888156                         | 0.109187119 | PMS1        |
| 2                            | 189784085                                         | 189877629                           | +           | 5454        |
| protein_coding               | "PMS1 homolog 1, mismatch repair system component | [Source:HGNC Symbol;Acc:HGNC:9121]" |             |             |
| 330                          | 320                                               | 227                                 | 574         | 473         |
| 4.437530125                  | 3.362101728                                       | 5.153774856                         | 4.109343524 | 389         |
| ENSG00000175215              | 2392.420797                                       | 3.606469012                         | 1.93527079  |             |
| 2089.548454                  | 2087.788554                                       | 2182.398048                         | 3073.627922 |             |
| 1924.69396                   | 0.405532068                                       | 1596.744873                         | 2549.482256 |             |
| 12                           | 57819927                                          | 0.018905021                         | 0.109248908 | CTDSP2      |
| 12                           | 57819927                                          | 57846739                            | -           | 5442        |
| protein_coding               | CTD small phosphatase 2                           | [Source:HGNC Symbol;Acc:HGNC:17077] |             |             |
| 1851                         | 23.72904587                                       | 2637                                | 2466        | 2644        |
| 20.59488657                  | 20.65867808                                       | 21.47143031                         | 30.22802411 | 1829        |
| ENSG00000257103              | 3030.218226                                       | 15.81535335                         | 2801.604876 |             |
|                              |                                                   | 2735.520018                         |             |             |

|                                      |                                                    |             |             |             |
|--------------------------------------|----------------------------------------------------|-------------|-------------|-------------|
| 2394.123192                          | 2312.662444                                        | 2229.921932 | 2855.78104  |             |
| 2312.235856                          | 0.304756777                                        | 0.018928836 | 0.109350808 | LSM14A      |
| 19                                   | 34172504                                           | 34229515    | + 4748      |             |
| protein_coding                       | "LSM14A, mRNA processing body assembly factor      |             |             |             |
| [Source:HGNC Symbol;Acc:HGNC:24489]" | -                                                  | 3340        | 3091        | 2410        |
| 2311                                 | 2026                                               | 2585        | 34.44803392 | 30.847128   |
| 31.58007659                          | 27.04589009                                        | 26.22865925 | 25.31517041 |             |
| ENSG00000143951                      | 82.5598379                                         | 43.3647625  | 62.77454909 |             |
| 158.5031797                          | 118.7151501                                        | 100.0661293 | 62.8997165  |             |
| 125.7614864                          | -0.999037968                                       | 0.018985208 | 0.109640663 | WDPCP       |
| 2                                    | 63121383                                           | 63827843    | - 11776     |             |
| protein_coding                       | WD repeat containing planar cell polarity effector |             |             |             |
| [Source:HGNC Symbol;Acc:HGNC:28027]" | -                                                  | 91          | 49          | 54          |
| 153                                  | 104                                                | 116         | 0.378418429 | 0.197162685 |
| 0.285300682                          | 0.721947601                                        | 0.542853825 | 0.458027138 |             |
| ENSG00000143294                      | 1889.803762                                        | 2070.888658 | 2025.060454 |             |
| 2033.606155                          | 2520.413957                                        | 3559.248701 | 1995.250958 |             |
| 2704.422938                          | -0.439216298                                       | 0.01901078  | 0.109752507 | PRCC        |
| 1                                    | 156750610                                          | 156800817   | + 4108      |             |
| protein_coding                       | proline rich mitotic checkpoint control factor     |             |             |             |
| [Source:HGNC Symbol;Acc:HGNC:9343]"  | -                                                  | 2083        | 2340        | 1742        |
| 1963                                 | 2208                                               | 4126        | 24.83061742 | 26.99055801 |
| 26.38302338                          | 26.55228545                                        | 33.03817082 | 46.70138999 |             |
| ENSG00000234745                      | 1340.916928                                        | 1985.929124 | 2587.706413 |             |
| 1196.543612                          | 1505.627721                                        | 1493.228187 | 1971.517488 |             |
| 1398.466507                          | 0.494814356                                        | 0.019051004 | 0.109936059 | HLA-B       |
| 6                                    | 31269491                                           | 31357188    | - 3051      |             |
| protein_coding                       | "major histocompatibility complex, class I, B      |             |             |             |
| [Source:HGNC Symbol;Acc:HGNC:4932]"  | -                                                  | 1478        | 2244        | 2226        |
| 1155                                 | 1319                                               | 1731        | 23.72252483 | 34.85034532 |
| 45.39309543                          | 21.03545064                                        | 26.57357275 | 26.38067347 |             |
| ENSG00000130066                      | 315.7233362                                        | 385.8578868 | 533.5836673 |             |
| 472.4016337                          | 799.0442797                                        | 602.9846926 | 411.7216301 |             |
| 624.810202                           | -0.603037625                                       | 0.019055004 | 0.109936059 | SAT1        |
| X                                    | 23783173                                           | 23786226    | + 2498      |             |
| protein_coding                       | spermidine/spermine N1-acetyltransferase 1         |             |             |             |
| [Source:HGNC Symbol;Acc:HGNC:10540]" | -                                                  | 348         | 436         | 459         |
| 456                                  | 700                                                | 699         | 6.822059352 | 8.270285384 |
| 11.43212852                          | 10.14342103                                        | 17.22475154 | 13.01115228 |             |
| ENSG00000152253                      | 644.1481858                                        | 512.4121937 | 542.8836005 |             |
| 357.4091307                          | 149.5354295                                        | 61.24737221 | 566.4813267 |             |
| 189.3973108                          | 1.581366783                                        | 0.019062856 | 0.109945505 | SPC25       |
| 2                                    | 168834132                                          | 168913371   | - 1841      |             |
| protein_coding                       | "SPC25, NDC80 kinetochore complex component        |             |             |             |
| [Source:HGNC Symbol;Acc:HGNC:24031]" | -                                                  | 710         | 579         | 467         |
| 345                                  | 131                                                | 71          | 18.88570683 | 14.90222842 |
| 15.78228707                          | 10.41303553                                        | 4.373859894 | 1.793228276 |             |
| ENSG00000106266                      | 2166.515307                                        | 2397.45187  | 2029.710421 |             |
| 2668.654843                          | 2543.243793                                        | 3142.594042 | 2197.892532 |             |
| 2784.830893                          | -0.341518286                                       | 0.019077555 | 0.109994419 | SNX8        |



|                        |                                     |              |             |          |                |        |
|------------------------|-------------------------------------|--------------|-------------|----------|----------------|--------|
| 7                      | 2251770                             | 2354318      | -           | 5773     | protein_coding |        |
| sorting nexin 8        | [Source:HGNC Symbol;Acc:HGNC:14972] |              |             |          | -              | 2388   |
| 2709                   | 1746                                | 2576         | 2228        | 3643     | 20.25636195    |        |
| 22.23483384            | 18.81696289                         |              | 24.79455652 |          | 23.72252916    |        |
| 29.34192697            |                                     |              |             |          |                |        |
| ENSG00000198720        | 501.7097842                         |              | 570.8218738 |          | 430.1219105    |        |
| 634.0127189            | 683.7536051                         |              | 753.9465256 |          | 500.8845228    |        |
| 690.5709498            | -0.462419121                        |              | 0.019097731 |          | 0.110032682    |        |
| ANKRD13B               | 17                                  | 29589769     |             | 29614761 | +              | 3971   |
| protein_coding         | ankyrin repeat domain 13B           | [Source:HGNC |             |          |                |        |
| Symbol;Acc:HGNC:26363] | -                                   | 553          | 645         | 370      | 612            | 599    |
| 874                    | 6.81952189                          |              | 7.696375854 |          | 5.797071856    |        |
| 8.563742077            | 9.272018629                         |              | 10.23393287 |          |                |        |
| ENSG00000188517        | 0                                   | 0            | 2.3249833   |          | 8.287747959    |        |
| 5.707459141            | 25.01653231                         |              | 0.774994433 |          |                |        |
| 13.00391314            | -4.194794286                        |              | 0.019098661 |          | 0.110032682    |        |
| COL25A1 4              | 108808725                           |              | 109302752   |          | -              | 8744   |
| protein_coding         | collagen type XXV alpha 1 chain     | [Source:HGNC |             |          |                |        |
| Symbol;Acc:HGNC:18603] | -                                   | 0            | 0           | 2        | 8              | 5      |
| 29                     | 0                                   | 0            | 0.014230714 |          | 0.050838401    |        |
| 0.035148534            | 0.154212248                         |              |             |          |                |        |
| ENSG00000166326        | 3012.073207                         |              | 2581.530862 |          | 2817.879759    |        |
| 3522.292883            | 3499.813945                         |              | 3357.391164 |          | 2803.827943    |        |
| 3459.832664            | -0.303274301                        |              | 0.019102853 |          | 0.110032682    | TRIM44 |
| 11                     | 35662805                            |              | 35818007    |          | +              | 13077  |
| protein_coding         | tripartite motif containing 44      | [Source:HGNC |             |          |                |        |
| Symbol;Acc:HGNC:19016] | -                                   | 3320         | 2917        | 2424     | 3400           | 3066   |
| 3892                   | 12.43250503                         |              | 10.56950738 |          | 11.53270912    |        |
| 14.44717179            | 14.41157303                         |              | 13.83871374 |          |                |        |
| ENSG00000198768        | 811.0823636                         |              | 1081.464077 |          | 1464.739479    |        |
| 659.9119313            | 906.3445116                         |              | 775.5125017 |          | 1119.095307    |        |
| 780.5896482            | 0.519037616                         |              | 0.01912705  |          | 0.110111666    |        |
| APCDD1L 20             | 58459101                            |              | 58515131    |          | -              | 3942   |
| protein_coding         | APC down-regulated 1 like           | [Source:HGNC |             |          |                |        |
| Symbol;Acc:HGNC:26892] | -                                   | 894          | 1222        | 1260     | 637            | 794    |
| 899                    | 11.1057932                          |              | 14.68862105 |          | 19.88661069    |        |
| 8.979142337            | 12.38087226                         |              | 10.60410672 |          |                |        |
| ENSG00000104549        | 2592.01601                          |              | 2322.227282 |          | 2538.881763    |        |
| 2083.332643            | 2086.647062                         |              | 1745.981428 |          | 2484.375018    |        |
| 1971.987044            | 0.333572491                         |              | 0.019129015 |          | 0.110111666    | SQLE   |
| 8                      | 124998497                           |              | 125022283   |          | +              | 4305   |
| protein_coding         | squalene epoxidase                  | [Source:HGNC |             |          |                |        |
| -                      | 2857                                | 2624         | 2184        | 2011     | 1828           | 2024   |
| 32.49868348            | 28.88132514                         |              | 31.56358502 |          | 25.9567885     |        |
| 26.10059428            | 21.86091676                         |              |             |          |                |        |
| ENSG00000117899        | 1164.91024                          |              | 1208.018384 |          | 1221.778724    |        |
| 960.3427948            | 778.4974268                         |              | 1004.111849 |          | 1198.235783    |        |
| 914.3173568            | 0.389189589                         |              | 0.019147806 |          | 0.110183974    | MESD   |
| 15                     | 80946289                            |              | 80989878    |          | -              | 7510   |
| protein_coding         | mesoderm development LRP chaperone  | [Source:HGNC |             |          |                |        |

|                        |                                                       |             |             |             |             |       |
|------------------------|-------------------------------------------------------|-------------|-------------|-------------|-------------|-------|
| Symbol;Acc:HGNC:13520] | -                                                     | 1284        | 1365        | 1051        | 927         | 682   |
| 1164                   | 8.372473281                                           | 8.612300111 |             | 8.707021676 |             |       |
| 6.85885846             | 5.582025265                                           | 7.206826411 |             |             |             |       |
| ENSG00000130734        | 371.9728961                                           | 418.6027074 |             | 544.0460921 |             |       |
| 458.9340432            | 736.2622292                                           | 796.2158388 |             | 444.8738985 |             |       |
| 663.8040371            | -0.579159155                                          | 0.019161905 |             | 0.110229248 |             | ATG4D |
| 19                     | 10543895                                              | 10553418    |             | +           | 2278        |       |
| protein_coding         | autophagy related 4D cysteine peptidase [Source:HGNC  |             |             |             |             |       |
| Symbol;Acc:HGNC:20789] | -                                                     | 410         | 473         | 468         | 443         | 645   |
| 923                    | 8.813711295                                           | 9.838612633 |             | 12.78200491 |             |       |
| 10.80592752            | 17.40417154                                           | 18.83991762 |             |             |             |       |
| ENSG00000147168        | 1.814501932                                           | 1.769990306 |             | 8.137441549 |             |       |
| 19.6834014             | 14.83939377                                           | 33.64292277 |             | 3.907311262 |             |       |
| 22.72190598            | -2.579818185                                          | 0.019202672 |             | 0.110367966 |             | IL2RG |
| X                      | 71107404                                              | 71112108    |             | -           | 2760        |       |
| protein_coding         | interleukin 2 receptor subunit gamma [Source:HGNC     |             |             |             |             |       |
| Symbol;Acc:HGNC:6010]  | -                                                     | 2           | 2           | 7           | 19          | 13    |
| 39                     | 0.035485391                                           | 0.034335815 |             | 0.157795933 |             |       |
| 0.382522127            | 0.28952204                                            | 0.657032032 |             |             |             |       |
| ENSG00000100564        | 408.2629347                                           | 544.2720192 |             | 255.748163  |             |       |
| 607.077538             | 602.7076853                                           | 626.2759469 |             | 402.7610389 |             |       |
| 612.0203901            | -0.60125008                                           | 0.0192051   |             | 0.110367966 |             | PIGH  |
| 14                     | 67581955                                              | 67600287    |             | -           | 2915        |       |
| protein_coding         | phosphatidylinositol glycan anchor biosynthesis class |             |             |             |             |       |
| H [Source:HGNC         | Symbol;Acc:HGNC:8964]                                 | -           |             | 450         | 615         | 220   |
| 586                    | 528                                                   | 726         |             | 7.559666526 | 9.996845899 |       |
| 4.695598642            | 11.1704611                                            | 11.13378226 |             | 11.58054717 |             |       |
| ENSG00000130202        | 1543.233893                                           | 1725.740549 |             | 2329.633266 |             |       |
| 879.5372522            | 1490.788328                                           | 1552.750281 |             | 1866.202569 |             |       |
| 1307.691954            | 0.512406116                                           | 0.019209407 |             | 0.110367966 |             |       |
| NECTIN2                | 19                                                    | 44846175    | 44889228    | +           | 3747        |       |
| protein_coding         | nectin cell adhesion molecule 2 [Source:HGNC          |             |             |             |             |       |
| Symbol;Acc:HGNC:9707]  | -                                                     | 1701        | 1950        | 2004        | 849         | 1306  |
| 1800                   | 22.23050375                                           | 24.6591078  |             | 33.27521504 |             |       |
| 12.59029891            | 21.42431001                                           | 22.33674211 |             |             |             |       |
| ENSG00000139197        | 735.7805334                                           | 905.3500416 |             | 928.8308283 |             |       |
| 983.1341017            | 1259.065486                                           | 1187.853965 |             | 856.6538011 |             |       |
| 1143.351184            | -0.416905169                                          | 0.019216893 |             | 0.110367966 |             | PEX5  |
| 12                     | 7188685                                               | 7218574     | +           | 5488        |             |       |
| protein_coding         | peroxisomal biogenesis factor 5 [Source:HGNC          |             |             |             |             |       |
| Symbol;Acc:HGNC:9719]  | -                                                     | 811         | 1023        | 799         | 949         | 1103  |
| 1377                   | 8.832587975                                           | 9.058150314 |             | 9.608689362 |             |       |
| 7.23661445             | 11.6667759                                            |             |             |             |             |       |
| ENSG00000130203        | 144.2529036                                           | 114.1643748 |             | 115.0866733 |             |       |
| 69.40988916            | 28.5372957                                            | 79.36279217 |             | 124.5013172 |             |       |
| 59.10332568            | 1.069361818                                           | 0.019217216 |             | 0.110367966 |             | APOE  |
| 19                     | 44905754                                              | 44909393    |             | +           | 2191        |       |
| protein_coding         | apolipoprotein E [Source:HGNC                         |             |             |             |             |       |
| Symbol;Acc:HGNC:613]   | -                                                     | 159         | 129         | 99          | 67          | 25    |
| 92                     | 3.553721832                                           | 2.78980452  | 2.811251264 | 1.69919988  |             |       |

|                                 |                                                |             |             |                |       |             |
|---------------------------------|------------------------------------------------|-------------|-------------|----------------|-------|-------------|
| 0.701366456                     | 1.952434476                                    |             |             |                |       |             |
| ENSG00000132434                 | 1301.905136                                    | 1339.882662 | 1262.465932 |                |       |             |
| 1499.046412                     | 1642.606741                                    | 1836.558527 | 1301.41791  |                |       |             |
| 1659.403893                     | -0.350746492                                   | 0.019230853 | 0.110373146 | LANCL2         |       |             |
| 7                               | 55365448                                       | 55433742    | + 5235      |                |       |             |
| protein_coding                  | LanC like 2 [Source:HGNC Symbol;Acc:HGNC:6509] |             |             |                | -     |             |
| 1435                            | 1514                                           | 1086        | 1447        | 1439           | 2129  | 13.42344225 |
|                                 | 13.70363019                                    | 12.90684177 | 15.35903354 | 16.8962944     |       |             |
|                                 | 18.90993315                                    |             |             |                |       |             |
| ENSG00000136826                 | 166.0269268                                    | 197.3539191 | 146.4739479 |                |       |             |
| 313.898454                      | 227.1568738                                    | 266.555465  | 169.9515979 |                |       |             |
| 269.2035976                     | -0.662178249                                   | 0.019231334 | 0.110373146 | KLF4           |       |             |
| 9                               | 107484852                                      | 107490482   | - 3659      |                |       |             |
| protein_coding                  | Kruppel like factor 4 [Source:HGNC             |             |             |                |       |             |
| Symbol;Acc:HGNC:6348]           | zf-C2H2                                        | 183         | 223         | 126            | 303   | 199         |
| 309                             | 2.449161161                                    | 2.887811851 | 2.142471149 |                |       |             |
| 4.601424099                     | 3.343012705                                    | 3.926694264 |             |                |       |             |
| ENSG00000103257                 | 12370.36692                                    | 16956.50713 | 15479.73881 |                |       |             |
| 14484.9115                      | 21075.36362                                    | 24239.29453 | 14935.53762 |                |       |             |
| 19933.18988                     | -0.416465736                                   | 0.019236837 | 0.110373146 | SLC7A5         |       |             |
| 16                              | 87830023                                       | 87869488    | - 4745      |                |       |             |
| protein_coding                  | solute carrier family 7 member 5 [Source:HGNC  |             |             |                |       |             |
| Symbol;Acc:HGNC:11063]          | -                                              | 13635       | 19160       | 13316          | 13982 | 18463       |
| 28099                           | 140.7173374                                    | 191.3311707 | 174.6000711 |                |       |             |
| 163.7363575                     | 239.1736951                                    | 275.3503708 |             |                |       |             |
| ENSG00000158042                 | 1267.429599                                    | 1635.471043 | 1397.314963 |                |       |             |
| 1640.974096                     | 1703.105808                                    | 2476.636699 | 1433.405202 |                |       |             |
| 1940.238868                     | -0.43726253                                    | 0.019259832 | 0.110469249 | MRPL17         |       |             |
| 11                              | 6680782                                        | 6683401     | - 2276      | protein_coding |       |             |
| mitochondrial ribosomal protein | L17 [Source:HGNC                               |             |             |                |       |             |
| Symbol;Acc:HGNC:14053]          | -                                              | 1397        | 1848        | 1202           | 1584  | 1492        |
| 2871                            | 30.05749835                                    | 38.47300864 | 32.85784348 |                |       |             |
| 38.6718513                      | 40.29432877                                    | 58.65323263 |             |                |       |             |
| ENSG00000198160                 | 1418.940511                                    | 1056.684213 | 1146.216767 |                |       |             |
| 1131.277596                     | 662.0652603                                    | 764.2981941 | 1207.280497 |                |       |             |
| 852.547017                      | 0.501939365                                    | 0.019308103 | 0.11059978  | MIER1          |       |             |
| 1                               | 66924895                                       | 66988619    | + 8273      |                |       |             |
| protein_coding                  | MIER1 transcriptional regulator [Source:HGNC   |             |             |                |       |             |
| Symbol;Acc:HGNC:29657]          | Others                                         | 1564        | 1194        | 986            | 1092  | 580         |
| 886                             | 9.25768518                                     | 6.838608524 | 7.415163599 |                |       |             |
| 7.334519333                     | 4.309355567                                    | 4.979683214 |             |                |       |             |
| ENSG00000260686                 | 52.62055603                                    | 38.93978674 | 55.79959919 |                |       |             |
| 65.26601518                     | 122.1396256                                    | 124.2200225 | 49.11998065 |                |       |             |
| 103.8752211                     | -1.083356616                                   | 0.01931276  | 0.11059978  |                |       |             |
| AC008669.1                      | 5                                              | 122832356   | 122834533   | + 2178         |       |             |
| sense_overlapping               | "novel transcript, overlapping SNX2"           |             |             |                |       |             |
| -                               | 58                                             | 44          | 48          | 63             | 107   | 144         |
| 1.304063687                     | 0.95724089                                     | 1.371166546 | 1.607291758 |                |       |             |
| 3.019765801                     | 3.074224893                                    |             |             |                |       |             |
| ENSG00000145451                 | 3.629003864                                    | 2.654985459 | 1.16249165  |                |       |             |

|                         |                                                |                |                |             |  |
|-------------------------|------------------------------------------------|----------------|----------------|-------------|--|
| 29.00711786             | 18.26386925                                    | 7.763751407    | 2.482160324    |             |  |
| 18.34491284             | -2.862582                                      | 0.019316676    | 0.11059978     | GLRA3       |  |
| 4                       | 174636914                                      | 174829314      | - 9599         |             |  |
| protein_coding          | glycine receptor alpha 3 [Source:HGNC          |                |                |             |  |
| Symbol;Acc:HGNC:4328]   | -                                              | 4 3            | 1 28           | 16          |  |
| 9                       | 0.020406226                                    | 0.014808863    | 0.00648158     |             |  |
| 0.162085469             | 0.102456933                                    | 0.04359609     |                |             |  |
| ENSG00000106571         | 2051.294434                                    | 1559.36146     | 2054.122745    |             |  |
| 1601.607293             | 1458.826556                                    | 1244.788142    | 1888.259546    |             |  |
| 1435.073997             | 0.396007536                                    | 0.019316914    | 0.11059978     | GLI3        |  |
| 7                       | 41960950                                       | 42237870       | - 10950        |             |  |
| protein_coding          | GLI family zinc finger 3 [Source:HGNC          |                |                |             |  |
| Symbol;Acc:HGNC:4319]   | zf-C2H2                                        | 2261 1762      | 1767 1546      | 1278        |  |
| 1443                    | 10.1114893                                     | 7.624620382    | 10.03989745    |             |  |
| 7.845261317             | 7.174044973                                    | 6.127498732    |                |             |  |
| ENSG00000174343         | 48.0843012                                     | 40.70977704    | 31.38727455    |             |  |
| 119.1363769             | 85.61188711                                    | 62.97265031    | 40.06045093    |             |  |
| 89.24030478             | -1.150369855                                   | 0.019319523    | 0.11059978     | CHRNA9      |  |
| 4                       | 40335329                                       | 40355217       | + 3168         |             |  |
| protein_coding          | cholinergic receptor nicotinic alpha 9 subunit |                |                |             |  |
| [Source:HGNC            | Symbol;Acc:HGNC:14079]                         | -              | 53 46          | 27          |  |
| 115                     | 75 73                                          | 0.819255527    | 0.68801689     |             |  |
| 0.530255813             | 2.017087375                                    | 1.455202562    | 1.071442096    |             |  |
| ENSG00000103326         | 2189.196581                                    | 2753.219921    | 1954.148463    |             |  |
| 2567.12993              | 2893.681784                                    | 3734.364427    | 2298.854989    |             |  |
| 3065.058714             | -0.414910943                                   | 0.019320104    | 0.11059978     | CAPN15      |  |
| 16                      | 527717 554636                                  | + 7987         | protein_coding |             |  |
| calpain 15 [Source:HGNC | Symbol;Acc:HGNC:11182]                         | Others         | 2413 3111      |             |  |
| 1681                    | 2478 2535                                      | 4329           | 14.79456911    | 18.45622039 |  |
| 13.09455896             | 17.2396983                                     | 19.50929786    | 25.20199491    |             |  |
| ENSG00000184108         | 0 2.654985459                                  | 0              | 9.323716454    |             |  |
| 5.707459141             | 27.60444945                                    | 0.884995153    |                |             |  |
| 14.21187501             | -3.951704548                                   | 0.019343531    | 0.110698068    | TRIML1      |  |
| 4                       | 188139419                                      | 188147743      | + 2113         |             |  |
| protein_coding          | tripartite motif family like 1 [Source:HGNC    |                |                |             |  |
| Symbol;Acc:HGNC:26698]  | -                                              | 0 3            | 0 9            | 5           |  |
| 32                      | 0 0.067274147                                  | 0              | 0.236676455    |             |  |
| 0.145451387             | 0.704176454                                    |                |                |             |  |
| ENSG00000101882         | 660.4787032                                    | 687.641234     | 767.2444889    |             |  |
| 929.2637399             | 993.0978905                                    | 865.2269624    | 705.1214754    |             |  |
| 929.1961976             | -0.398373964                                   | 0.019395858    | 0.110961621    | NKAP        |  |
| X                       | 119920672                                      | 119943772      | - 7894         |             |  |
| protein_coding          | NFKB activating protein [Source:HGNC           |                |                |             |  |
| Symbol;Acc:HGNC:29873]  | -                                              | 728 777        | 660 897        | 870         |  |
| 1003                    | 4.516093666                                    | 4.663911894    | 5.201800117    |             |  |
| 6.31404052              | 6.774379011                                    | 5.907923037    |                |             |  |
| ENSG00000148204         | 1.814501932                                    | 0 0            | 32.11502334    | 0           |  |
| 12.93958568             | 0.604833977                                    | 15.01820301    | -4.588182833   |             |  |
| 0.019402788             | 0.11096538                                     | CRB2           | 9              | 123356170   |  |
| 123380324               | + 6349                                         | protein_coding | "crumbs 2,     |             |  |

|                                                                      |              |             |              |             |             |        |
|----------------------------------------------------------------------|--------------|-------------|--------------|-------------|-------------|--------|
| cell polarity complex component [Source:HGNC Symbol;Acc:HGNC:18688]" |              |             |              |             |             |        |
| -                                                                    | 2            | 0           | 0            | 31          | 0           | 15     |
| 0.015426001                                                          | 0            | 0           | 0.27131163   | 0           | 0.109854272 |        |
| ENSG00000199473                                                      | 0            | 0           | 0            | 0           | 34.50556181 |        |
| 0                                                                    | 11.50185394  |             | -6.004550384 | 0.019430423 |             |        |
| 0.111087507                                                          | RF00092      | 7           | 17373201     | 17373326    |             | -      |
| 126                                                                  | snoRNA       |             | -            | 0           | 0           | 0      |
| 0                                                                    | 40           | 0           | 0            | 0           | 0           | 0      |
| 14.76115921                                                          |              |             |              |             |             |        |
| ENSG00000184677                                                      | 1349.989437  |             | 1231.913253  | 946.268203  |             |        |
| 1673.089119                                                          | 1423.44031   |             | 1576.041536  | 1176.056965 |             |        |
| 1557.523655                                                          | -0.40450011  |             | 0.019446979  | 0.111120818 |             | ZBTB40 |
| 1                                                                    | 22428838     |             | 22531157     | +           | 9169        |        |
| protein_coding zinc finger and BTB domain containing 40 [Source:HGNC |              |             |              |             |             |        |
| Symbol;Acc:HGNC:29045] ZBTB                                          |              |             |              |             |             |        |
| 1827                                                                 | 7.947117643  |             | 7.193557235  | 5.523435397 |             |        |
| 9.787293173                                                          | 8.359722108  |             | 9.265046274  |             |             |        |
| ENSG00000125319                                                      | 347.47712    |             | 441.6125814  | 360.3724115 |             |        |
| 228.9490374                                                          | 215.7419555  |             | 314.8632515  | 383.1540376 |             |        |
| 253.1847481                                                          | 0.595924002  |             | 0.019448813  | 0.111120818 |             |        |
| C17orf53                                                             | 17           | 44141906    | 44162476     | +           |             | 3005   |
| protein_coding chromosome 17 open reading frame 53                   |              |             |              |             |             |        |
| [Source:HGNC Symbol;Acc:HGNC:28460]                                  |              |             |              |             |             |        |
| 221                                                                  | 189          | 365         | 6.241413862  | 7.868328986 |             | 310    |
| 6.418359874                                                          | 4.086578455  |             | 3.866025266  | 5.647801264 |             |        |
| ENSG00000186312                                                      | 142.4384017  |             | 130.0942875  | 137.1740147 |             |        |
| 199.9419195                                                          | 224.8738902  |             | 228.599347   | 136.5689013 |             |        |
| 217.8050522                                                          | -0.673734192 |             | 0.019456628  | 0.111129574 |             | CA5BP1 |
| X                                                                    | 15674932     |             | 15703724     | +           | 2409        |        |
| transcribed_unprocessed_pseudogene carbonic anhydrase 5B             |              |             |              |             |             |        |
| pseudogene 1 [Source:HGNC Symbol;Acc:HGNC:29544]                     |              |             |              |             |             |        |
| 147                                                                  | 118          | 193         | 197          | 265         | 3.191475655 | 157    |
| 2.891392003                                                          | 3.047558521  |             | 4.4517683    | 5.026628466 |             |        |
| 5.114934681                                                          |              |             |              |             |             |        |
| ENSG00000203786                                                      | 0            | 0.884995153 | 0            | 8.287747959 |             |        |
| 14.83939377                                                          | 5.175834272  |             | 0.294998384  |             |             |        |
| 9.434325332                                                          | -4.74845321  |             | 0.019466329  | 0.111149092 |             | KPRP   |
| 1                                                                    | 152759561    |             | 152762052    | +           | 2492        |        |
| protein_coding keratinocyte proline rich protein [Source:HGNC        |              |             |              |             |             |        |
| Symbol;Acc:HGNC:31823]                                               |              |             |              |             |             |        |
| 6                                                                    | 0            | 0.019014215 | 0            | 0.178383217 |             | 13     |
| 0.320658439                                                          |              |             |              |             |             |        |
| ENSG00000107758                                                      | 953.5207652  |             | 898.2700804  | 1149.704242 |             |        |
| 1236.946383                                                          | 1253.358027  |             | 1443.195123  | 1000.498362 |             |        |
| 1311.166511                                                          | -0.391485992 |             | 0.019477385  | 0.111176337 |             | PPP3CB |
| 10                                                                   | 73436428     |             | 73496024     | -           | 5094        |        |
| protein_coding protein phosphatase 3 catalytic subunit beta          |              |             |              |             |             |        |
| [Source:HGNC Symbol;Acc:HGNC:9315]                                   |              |             |              |             |             |        |
| 1194                                                                 | 1098         | 1673        | 10.10351426  | 9.44133793  |             | 989    |
| 12.07936759                                                          |              |             |              |             |             |        |
| 13.02439113                                                          |              |             | 13.24923367  | 15.27101903 |             |        |

|                         |                                                     |             |                               |             |             |     |
|-------------------------|-----------------------------------------------------|-------------|-------------------------------|-------------|-------------|-----|
| ENSG00000182263         | 230.4417454                                         | 159.2991276 | 130.1990648                   |             |             |     |
| 131.5679989             | 75.33846066                                         | 68.14848458 | 173.3133126                   |             |             |     |
| 91.68498136             | 0.921387256                                         | 0.019532705 | 0.111456134                   | FIGN        |             |     |
| 2                       | 163593396                                           | 163736012   | -                             | 9942        |             |     |
| protein_coding          | "fidgetin, microtubule severing factor [Source:HGNC |             |                               |             |             |     |
| Symbol;Acc:HGNC:13285]" | -                                                   | 254         | 180                           | 112         | 127         | 66  |
| 79                      | 1.251090255                                         | 0.857877321 | 0.700892012                   |             |             |     |
| 0.709809824             | 0.408053904                                         | 0.369474398 |                               |             |             |     |
| ENSG00000285091         | 0                                                   | 0           | 12.43162194                   | 0           |             |     |
| 14.66486377             | 0                                                   | 9.032161903 | -5.654330204                  | 0.019555496 |             |     |
| 0.1115502               | AL109840.2                                          | 20          | 58916000                      |             |             |     |
| 58981169                | -                                                   | 1925        | bidirectional_promoter_lncRNA | novel       |             |     |
| transcript              | -                                                   | 0           | 0                             | 12          | 0           | 17  |
| 0                       | 0                                                   | 0           | 0.346387775                   | 0           | 0.410628611 |     |
| ENSG00000249852         | 9.07250966                                          | 5.309970919 | 8.137441549                   | 0           |             |     |
| 0                       | 0                                                   | 7.506640709 | 0                             | 5.340621736 |             |     |
| 0.019578468             | 1                                                   | AC145676.1  | 7                             | 227554      | 229557      | -   |
| 2004                    | TEC                                                 | TEC         | -                             | 10          | 6           | 7   |
| 0                       | 0                                                   | 0.244360478 | 0.141866539                   | 0.21732374  |             |     |
| 0                       | 0                                                   | 0           |                               |             |             |     |
| ENSG00000081791         | 1041.524109                                         | 940.7498478 | 1068.329826                   |             |             |     |
| 819.4510795             | 765.9410167                                         | 759.1223598 | 1016.867928                   |             |             |     |
| 781.5048187             | 0.379535239                                         | 0.01958097  | 0.11165801                    | DELE1       |             |     |
| 5                       | 141923808                                           | 141942047   | +                             | 6047        |             |     |
| protein_coding          | DAP3 binding cell death enhancer 1 [Source:HGNC     |             |                               |             |             |     |
| Symbol;Acc:HGNC:28969]" | -                                                   | 1148        | 1063                          | 919         | 791         | 671 |
| 880                     | 9.296738238                                         | 8.329515424 | 9.45545407                    |             |             |     |
| 7.268562992             | 6.820715135                                         | 6.766650127 |                               |             |             |     |
| ENSG00000230513         | 97.07585336                                         | 115.9343651 | 94.16182364                   |             |             |     |
| 140.8917153             | 165.5163151                                         | 231.1872641 | 102.3906807                   |             |             |     |
| 179.1984315             | -0.808100004                                        | 0.01958702  | 0.11165801                    | THAP7-      |             |     |
| AS1                     | 22                                                  | 21001886    | 21010342                      | +           | 2975        |     |
| antisense               | THAP7 antisense RNA 1 [Source:HGNC                  |             |                               |             |             |     |
| Symbol;Acc:HGNC:41013]" | -                                                   | 107         | 131                           | 81          | 136         | 145 |
| 268                     | 1.761268189                                         | 2.086463379 | 1.693966804                   |             |             |     |
| 2.540177015             | 2.995907446                                         | 4.188696001 |                               |             |             |     |
| ENSG00000232218         | 4.53625483                                          | 3.539980612 | 15.11239145                   | 0           |             |     |
| 0                       | 0                                                   | 7.729542297 | 0                             | 5.377954192 |             |     |
| 0.019625209             | 1                                                   | AL021937.2  | 22                            | 32386668    |             |     |
| 32386868                | +                                                   | 201         | unprocessed_pseudogene        | Ral-GDS     |             |     |
| related protein         | Rgr (Rgr) pseudogene                                | -           | 5                             | 4           | 13          |     |
| 0                       | 0                                                   | 0           | 1.21815522                    | 0.942953713 |             |     |
| 4.023964508             | 0                                                   | 0           | 0                             |             |             |     |
| ENSG00000261061         | 279.4332975                                         | 291.1634054 | 237.1482966                   |             |             |     |
| 221.6972579             | 87.89487077                                         | 155.2750281 | 269.2483332                   |             |             |     |
| 154.9557189             | 0.796124356                                         | 0.019664415 | 0.112055953                   |             |             |     |
| AC092718.4              | 16                                                  | 81030770    | 81031485                      | +           | 716         |     |
| sense_intronic          | novel transcript                                    |             |                               | -           | 308         | 329 |
| 204                     | 214                                                 | 77          | 180                           | 21.06523836 | 21.772551   |     |
| 17.72654068             | 16.60782633                                         | 6.610359258 | 11.68935373                   |             |             |     |

|                                      |                                                |              |             |        |
|--------------------------------------|------------------------------------------------|--------------|-------------|--------|
| ENSG00000144354                      | 889.1059467                                    | 888.5351337  | 784.6818637 |        |
| 740.7174739                          | 595.8587343                                    | 560.7153794  | 854.107648  |        |
| 632.4305292                          | 0.43441563                                     | 0.019669497  | 0.112055953 | CDCA7  |
| 2                                    | 173354820                                      | 173368997    | + 3934      |        |
| protein_coding                       | cell division cycle associated 7               | [Source:HGNC |             |        |
| Symbol;Acc:HGNC:14628]               | -                                              | 980 1004     | 675 715     | 522    |
| 650                                  | 12.19889248                                    | 12.09277015  | 10.67520599 |        |
| 10.09912459                          | 8.156118136                                    | 7.682631793  |             |        |
| ENSG00000198746                      | 290.3203091                                    | 369.0429789  | 416.1720107 |        |
| 427.8549884                          | 473.7191087                                    | 718.5783247  | 358.5117662 |        |
| 540.0508073                          | -0.593574425                                   | 0.019684107  | 0.112092401 |        |
| GPATCH3 1                            | 26890488                                       | 26900466     | - 2225      |        |
| protein_coding                       | G-patch domain containing 3                    | [Source:HGNC |             |        |
| Symbol;Acc:HGNC:25720]               | -                                              | 320 417      | 358 413     | 415    |
| 833                                  | 7.042853369                                    | 8.880399025  | 10.01059423 |        |
| 10.31411763                          | 11.46477251                                    | 17.40788481  |             |        |
| ENSG00000132591                      | 1236.583067                                    | 1648.74597   | 1520.539078 |        |
| 1614.038915                          | 2067.241701                                    | 2125.542608  | 1468.622705 |        |
| 1935.607741                          | -0.398537258                                   | 0.019688569  | 0.112092401 | ERAL1  |
| 17                                   | 28854938                                       | 28861067     | + 2318      |        |
| protein_coding                       | Era like 12S mitochondrial rRNA                | chaperone 1  |             |        |
| [Source:HGNC Symbol;Acc:HGNC:3424]   | -                                              | 1363 1863    |             | 1308   |
| 1558                                 | 1811 2464                                      | 28.79460384  | 38.08253624 |        |
| 35.10760141                          | 37.34788951                                    | 48.0233419   | 49.42632153 |        |
| ENSG00000056558                      | 466.3269965                                    | 427.452659   | 552.1835337 |        |
| 507.6245625                          | 741.9696883                                    | 836.7598739  | 481.9877297 |        |
| 695.4513749                          | -0.53053292                                    | 0.019708074  | 0.112151641 | TRAF1  |
| 9                                    | 120902393                                      | 120929173    | - 6449      |        |
| protein_coding                       | TNF receptor associated factor 1               | [Source:HGNC |             |        |
| Symbol;Acc:HGNC:12031]               | -                                              | 514 483      | 475 490     | 650    |
| 970                                  | 3.903007858                                    | 3.548797305  | 4.582559149 |        |
| 4.221975869                          | 6.19538557                                     | 6.993754374  |             |        |
| ENSG00000138802                      | 1193.942271                                    | 1046.064271  | 1179.929025 |        |
| 1675.161056                          | 1442.845671                                    | 1317.249822  | 1139.978522 |        |
| 1478.41885                           | -0.375002086                                   | 0.019711654  | 0.112151641 | SEC24B |
| 4                                    | 109433772                                      | 109540896    | + 5219      |        |
| protein_coding                       | "SEC24 homolog B, COPII coat complex component |              |             |        |
| [Source:HGNC Symbol;Acc:HGNC:10704]" | -                                              | 1316 1182    |             | 1015   |
| 1617                                 | 1264 1527                                      | 12.34801863  | 10.73140587 |        |
| 12.10000618                          | 17.21609961                                    | 14.88699825  | 13.60450543 |        |
| ENSG00000154370                      | 975.2947884                                    | 1116.863883  | 971.8430193 |        |
| 1083.623046                          | 1441.704179                                    | 1569.140423  | 1021.333897 |        |
| 1364.822549                          | -0.418275103                                   | 0.019746083  | 0.11228744  | TRIM11 |
| 1                                    | 228393673                                      | 228406840    | - 8493      |        |
| protein_coding                       | tripartite motif containing 11                 | [Source:HGNC |             |        |
| Symbol;Acc:HGNC:16281]               | -                                              | 1075 1262    | 836 1046    | 1263   |
| 1819                                 | 6.198348972                                    | 7.040843184  | 6.124237155 |        |
| 6.843568271                          | 9.140913235                                    | 9.958698702  |             |        |
| ENSG00000248968                      | 4.53625483                                     | 11.50493699  | 2.3249833   |        |
| 36.25889732                          | 26.25431205                                    | 23.29125422  | 6.122058373 |        |

|                                                |                                                      |                                     |                                     |              |                |
|------------------------------------------------|------------------------------------------------------|-------------------------------------|-------------------------------------|--------------|----------------|
| 28.60148786                                    | -2.204220866                                         | 0.019752585                         | 0.11228744                          |              |                |
| AC012640.1                                     | 5                                                    | 10248325                            | 10249915                            | +            | 688            |
| antisense                                      |                                                      | novel transcript                    | -                                   | 5            | 13             |
| 2                                              | 35                                                   | 23                                  | 27                                  | 0.355885464  | 0.895326327    |
| 0.180862448                                    | 2.826777656                                          | 2.054881385                         | 1.824762486                         |              |                |
| ENSG00000104980                                | 1310.977646                                          | 1773.530287                         | 1551.926353                         |              |                |
| 1652.369749                                    | 2221.343098                                          | 2286.856109                         | 1545.478095                         |              |                |
| 2053.522985                                    | -0.410134349                                         | 0.019760569                         | 0.11228744                          |              | TIMM44         |
| 19                                             | 7926718                                              | 7943920                             | -                                   | 4888         | protein_coding |
| translocase of inner mitochondrial membrane 44 | [Source:HGNC                                         |                                     |                                     |              |                |
| Symbol;Acc:HGNC:17316]                         | -                                                    | 1445                                | 2004                                | 1335         | 1595           |
| 2651                                           | 14.47655862                                          | 19.42642836                         | 16.99248578                         |              | 1946           |
| 18.13182563                                    | 24.47141031                                          | 25.21793661                         |                                     |              |                |
| ENSG00000237296                                | 484.4720158                                          | 320.3682454                         | 355.7224449                         |              |                |
| 580.1423571                                    | 574.1703896                                          | 514.132871                          | 386.8542354                         |              |                |
| 556.1485392                                    | -0.522720141                                         | 0.019760914                         | 0.11228744                          |              | SMG1P1         |
| 16                                             | 22437008                                             | 22492220                            | +                                   | 7046         |                |
| transcribed_unprocessed_pseudogene             |                                                      | SMG1                                | pseudogene 1                        | [Source:HGNC |                |
| Symbol;Acc:HGNC:44186]                         | -                                                    | 534                                 | 362                                 | 306          | 560            |
| 596                                            | 3.711310598                                          | 2.434402428                         | 2.702001802                         |              | 503            |
| 4.416288452                                    | 4.388061507                                          | 3.933096834                         |                                     |              |                |
| ENSG00000233421                                | 0                                                    | 0                                   | 10.35968495                         | 17.12237742  |                |
| 0                                              | 0                                                    | 9.160687457                         | -5.667045207                        | 0.019771107  |                |
| 0.112309285                                    | LINC01783                                            | 1                                   | 16533886                            |              |                |
| 16536172                                       | -                                                    | 2068                                | lincRNA long intergenic non-protein |              |                |
| coding RNA 1783                                | [Source:HGNC Symbol;Acc:HGNC:52573]                  |                                     |                                     | -            | 0              |
| 0                                              | 0                                                    | 10                                  | 15                                  | 0            | 0              |
| 0.268696191                                    | 0.445849296                                          | 0                                   |                                     |              |                |
| ENSG00000137760                                | 502.6170352                                          | 471.7024166                         | 484.759018                          |              |                |
| 694.0988916                                    | 658.6407849                                          | 612.4737221                         | 486.3594899                         |              |                |
| 655.0711329                                    | -0.429261581                                         | 0.019933781                         | 0.113196999                         |              | ALKBH8         |
| 11                                             | 107502726                                            | 107565746                           | -                                   | 4506         |                |
| protein_coding                                 | "alkB homolog 8, tRNA methyltransferase [Source:HGNC |                                     |                                     |              |                |
| Symbol;Acc:HGNC:25189]"                        | -                                                    | 554                                 | 533                                 | 417          | 670            |
| 710                                            | 6.020703788                                          | 5.604830231                         | 5.757735552                         |              | 577            |
| 8.262199151                                    | 7.871037581                                          | 7.326527422                         |                                     |              |                |
| ENSG00000174977                                | 95.26135143                                          | 131.8642778                         | 181.3486974                         |              |                |
| 149.1794633                                    | 292.221908                                           | 287.2588021                         | 136.1581089                         |              |                |
| 242.8867245                                    | -0.838387521                                         | 0.019959087                         | 0.113304331                         |              |                |
| AC026271.1                                     | 17                                                   | 18650195                            | 18651542                            | +            | 1348           |
| processed_pseudogene                           |                                                      | poly(A) binding protein interacting |                                     |              |                |
| protein 1 (PAIP1) pseudogene                   |                                                      | -                                   | 105                                 | 149          | 156            |
| 256                                            | 333                                                  | 3.814416307                         | 5.2374853                           | 7.200150143  |                |
| 5.935873588                                    | 11.67340177                                          | 11.48643765                         |                                     |              |                |
| ENSG00000141577                                | 688.6034832                                          | 738.9709529                         | 604.4956579                         |              |                |
| 452.7182323                                    | 465.7286659                                          | 561.5780185                         | 677.356698                          |              |                |
| 493.3416389                                    | 0.457044836                                          | 0.019968685                         | 0.11332245                          |              | CEP131         |
| 17                                             | 81189593                                             | 81222999                            | -                                   | 3966         |                |
| protein_coding                                 | centrosomal protein 131 [Source:HGNC                 |                                     |                                     |              |                |
| Symbol;Acc:HGNC:29511]                         | -                                                    | 759                                 | 835                                 | 520          | 437            |
|                                                |                                                      |                                     |                                     |              | 408            |



|                                                |                                                      |                        |              |                |  |
|------------------------------------------------|------------------------------------------------------|------------------------|--------------|----------------|--|
| 651                                            | 9.371686443                                          | 9.976086507            | 8.157507474  |                |  |
| 6.122668848                                    | 6.323460549                                          | 7.632367909            |              |                |  |
| ENSG00000157450                                | 811.0823636                                          | 672.5963164            | 854.4313627  |                |  |
| 1125.061785                                    | 996.522366                                           | 973.9194821            | 779.3700142  |                |  |
| 1031.834545                                    | -0.405470132                                         | 0.019977856            | 0.11333813   | RNF111         |  |
| 15                                             | 58865175                                             | 59097419               | + 7181       |                |  |
| protein_coding                                 | ring finger protein 111 [Source:HGNC                 |                        |              |                |  |
| Symbol;Acc:HGNC:17384]                         | -                                                    | 894 760                | 735 1086     | 873            |  |
| 1129                                           | 6.096509791                                          | 5.014817196            | 6.368090972  |                |  |
| 8.403436877                                    | 7.472685027                                          | 7.31038136             |              |                |  |
| ENSG00000140538                                | 44.45529733                                          | 22.12487883            | 37.1997328   |                |  |
| 5.179842475                                    | 0                                                    | 14.66486377            | 34.59330299  | 6.614902081    |  |
| 2.358074493                                    | 0.02000216                                           | 0.113439631            | NTRK3        | 15             |  |
| 87859751                                       | 88256768                                             | -                      | 26750        | protein_coding |  |
|                                                | neurotrophic receptor tyrosine kinase 3 [Source:HGNC |                        |              |                |  |
| Symbol;Acc:HGNC:8033]                          | -                                                    | 49 25                  | 32 5         | 0              |  |
| 17                                             | 0.089701763                                          | 0.044283574            | 0.074427433  |                |  |
| 0.010386238                                    | 0                                                    | 0.029549909            |              |                |  |
| ENSG00000166173                                | 740.3167882                                          | 800.9206136            | 981.1429525  |                |  |
| 825.6668904                                    | 1496.495787                                          | 1264.62884             | 840.7934514  |                |  |
| 1195.597173                                    | -0.508434757                                         | 0.020113334            | 0.11403358   | LARP6          |  |
| 15                                             | 70829130                                             | 70854159               | - 5554       |                |  |
| protein_coding                                 | La ribonucleoprotein domain family member 6          |                        |              |                |  |
| [Source:HGNC                                   | Symbol;Acc:HGNC:24012]                               | -                      | 816 905      | 844            |  |
| 797                                            | 1311 1466                                            | 7.194704592            | 7.720921637  |                |  |
| 9.45460562                                     | 7.973784416                                          | 14.5092237             | 12.27323678  |                |  |
| ENSG00000125457                                | 229.5344944                                          | 258.4185847            | 244.1232465  |                |  |
| 329.4379814                                    | 327.6081547                                          | 425.2810493            | 244.0254419  |                |  |
| 360.7757285                                    | -0.565308537                                         | 0.020132587            | 0.114106162  | MIF4GD         |  |
| 17                                             | 75266228                                             | 75271227               | - 2766       |                |  |
| protein_coding                                 | MIF4G domain containing [Source:HGNC                 |                        |              |                |  |
| Symbol;Acc:HGNC:24030]                         | -                                                    | 253 292                | 210 318      | 287            |  |
| 493                                            | 4.47916467                                           | 5.002154673            | 4.723609263  |                |  |
| 6.388324787                                    | 6.37789083                                           | 8.287542368            |              |                |  |
| ENSG00000006757                                | 17.23776835                                          | 10.61994184            | 52.31212425  |                |  |
| 9.323716454                                    | 0 0                                                  | 26.72327815            | 3.107905485  |                |  |
| 3.108319843                                    | 0.020179745                                          | 0.114336259            | PNPLA4 X     |                |  |
| 7898247 7927739                                | - 3441                                               | protein_coding         | patatin like |                |  |
| phospholipase domain containing 4 [Source:HGNC |                                                      | Symbol;Acc:HGNC:24887] |              |                |  |
| -                                              | 19 12                                                | 45 9                   | 0 0          |                |  |
| 0.27039435                                     | 0.165242978                                          | 0.81364449             | 0.145334888  | 0              |  |
| 0                                              |                                                      |                        |              |                |  |
| ENSG00000101928                                | 749.3892979                                          | 726.5810207            | 628.9079826  |                |  |
| 1048.400117                                    | 848.1284283                                          | 906.6336366            | 701.6261004  |                |  |
| 934.3873939                                    | -0.41261075                                          | 0.020186112            | 0.114336259  | MOSPD1         |  |
| X                                              | 134887626                                            | 134915267              | - 2675       |                |  |
| protein_coding                                 | motile sperm domain containing 1 [Source:HGNC        |                        |              |                |  |
| Symbol;Acc:HGNC:25235]                         | -                                                    | 826 821                | 541 1012     | 743            |  |
| 1051                                           | 15.12115428                                          | 14.54272566            | 12.58288784  |                |  |
| 21.0217453                                     | 17.07310014                                          | 18.26879691            |              |                |  |

|                                       |                                                                              |             |             |             |            |
|---------------------------------------|------------------------------------------------------------------------------|-------------|-------------|-------------|------------|
| ENSG00000253846                       | 99.79760626                                                                  | 76.99457832 | 211.5734803 |             |            |
| 63.19407819                           | 78.76293614                                                                  | 28.46708849 | 129.4552216 |             |            |
| 56.80803428                           | 1.190428881                                                                  | 0.020213063 | 0.114408653 |             |            |
| PCDHGA10                              | 5                                                                            | 141412987   | 141512979   | +           | 6643       |
| protein_coding                        | "protocadherin gamma subfamily A, 10 [Source:HGNC Symbol;Acc:HGNC:8697]"     |             |             |             |            |
|                                       |                                                                              | -           | 110         | 87          | 182        |
|                                       | 61                                                                           | 69          | 33          | 0.810880985 | 0.62055666 |
| 1.70456663                            | 0.510243671                                                                  | 0.638457802 | 0.230983366 |             |            |
| ENSG00000128578                       | 456.3472359                                                                  | 414.1777317 | 244.1232465 |             |            |
| 479.6534131                           | 575.3118814                                                                  | 629.7265031 | 371.5494047 |             |            |
| 561.5639325                           | -0.593803105                                                                 | 0.020217269 | 0.114408653 |             | STRIP2     |
|                                       | 7                                                                            | 129434433   | 129488399   | +           | 5876       |
| protein_coding                        | striatin interacting protein 2 [Source:HGNC Symbol;Acc:HGNC:22209]           |             |             |             |            |
|                                       |                                                                              | -           | 503         | 468         | 504        |
|                                       | 730                                                                          | 4.191938297 | 3.773901031 | 2.223536967 |            |
| 4.378357782                           | 5.272251384                                                                  | 5.776597276 |             |             |            |
| ENSG00000101189                       | 1279.223862                                                                  | 1550.511508 | 1596.101035 |             |            |
| 910.616307                            | 1114.096024                                                                  | 1294.821207 | 1475.278802 |             |            |
| 1106.511179                           | 0.414142454                                                                  | 0.020221262 | 0.114408653 |             | MRGBP      |
|                                       | 20                                                                           | 62796453    | 62801738    | +           | 2781       |
| protein_coding                        | MRG domain binding protein [Source:HGNC Symbol;Acc:HGNC:15866]               |             |             |             |            |
|                                       |                                                                              | -           | 1410        | 1752        | 976        |
|                                       | 1501                                                                         | 24.82828988 | 29.85104601 | 30.71683006 |            |
| 17.56304968                           | 21.57228697                                                                  | 25.09635919 |             |             |            |
| ENSG00000271936                       | 65.32206955                                                                  | 61.06466557 | 45.33717435 |             |            |
| 35.22292883                           | 5.707459141                                                                  | 13.80222472 | 57.24130315 |             |            |
| 18.24420423                           | 1.64901586                                                                   | 0.020224764 | 0.114408653 |             |            |
| AC012073.1                            | 2                                                                            | 24825610    | 24826717    | +           | 1108       |
| antisense                             | "novel transcript, antisense to ADCY3"                                       |             |             |             |            |
|                                       |                                                                              | -           | 72          | 69          |            |
|                                       | 72                                                                           | 69          | 39          | 34          | 5          |
|                                       | 2.950772798                                                                  | 2.189937363 | 1.705105284 | 0.277381571 |            |
|                                       | 0.671446231                                                                  |             |             |             |            |
| ENSG00000105229                       | 762.9980624                                                                  | 854.0203228 | 881.1686706 |             |            |
| 961.3787633                           | 1068.436351                                                                  | 1285.332177 | 832.7290186 |             |            |
| 1105.049097                           | -0.409179463                                                                 | 0.020231303 | 0.114409054 |             | PIAS4      |
|                                       | 19                                                                           | 4007646     | 4039386     | +           | 3646       |
| protein_inhibitor_of_activated_STAT_4 | [Source:HGNC Symbol;Acc:HGNC:17002] zf-MIZ                                   |             |             |             |            |
|                                       |                                                                              | -           | 841         | 965         | 936        |
|                                       | 1490                                                                         | 11.29556646 | 12.54114213 | 12.93479017 |            |
| 14.14305908                           | 15.77998349                                                                  | 19.00205725 |             |             |            |
| ENSG00000277149                       | 38.10454057                                                                  | 38.93978674 | 40.68720775 |             |            |
| 103.5968495                           | 62.78205055                                                                  | 87.98918262 | 39.24384502 |             |            |
| 84.78936089                           | -1.113286845                                                                 | 0.020255727 | 0.114510566 |             | TYW1B      |
|                                       | 7                                                                            | 72558744    | 72828198    | -           | 3258       |
| protein_coding                        | tRNA-yW synthesizing protein 1 homolog B [Source:HGNC Symbol;Acc:HGNC:33908] |             |             |             |            |
|                                       |                                                                              | -           | 42          | 44          | 55         |
|                                       | 102                                                                          | 0.63128707  | 0.639923468 | 0.668380562 |            |
| 1.705536286                           | 1.037669304                                                                  | 1.455727579 |             |             |            |
| ENSG00000111052                       | 25.40302705                                                                  | 25.66485944 | 45.33717435 |             |            |
| 11.39565344                           | 6.848950969                                                                  | 0           | 32.13502028 | 6.081534804 |            |

|                                                          |                                                 |             |             |                 |
|----------------------------------------------------------|-------------------------------------------------|-------------|-------------|-----------------|
| 2.417395742                                              | 0.020270268                                     | 0.114556154 | LIN7A       | 12              |
| 80792520                                                 | 80937925                                        | -           | 6795        | protein_coding  |
| "lin-7 homolog A, crumbs cell polarity complex component |                                                 |             |             |                 |
| [Source:HGNC Symbol;Acc:HGNC:17787]"                     |                                                 |             |             |                 |
| 11                                                       | 6                                               | 0           | 28          | 29 39           |
| 0.357093539                                              | 0.08995292                                      | 0.054276164 | 0           | 0.202225062     |
| ENSG00000272566                                          | 3.629003864                                     | 4.424975766 | 0           | 23.82727538     |
| 15.98088559                                              | 18.978059                                       | 2.684659877 | 19.59540666 |                 |
| -2.831092825                                             | 0.020302063                                     | 0.114676991 | AF250324.1  |                 |
| 4                                                        | 189703881                                       | 189704490   | -           | 610             |
| lincRNA novel transcript                                 | -                                               | 4           | 5           | 0 23            |
| 14                                                       | 22                                              | 0.321113704 | 0.388388722 | 0               |
| 2.095125509                                              | 1.410735389                                     | 1.67696448  |             |                 |
| ENSG00000198056                                          | 628.7249194                                     | 551.3519804 | 491.7339679 |                 |
| 414.387398                                               | 453.1722558                                     | 232.9125422 | 557.2702892 |                 |
| 366.8240653                                              | 0.606152136                                     | 0.020304615 | 0.114676991 | PRIM1           |
| 12                                                       | 56731596                                        | 56752373    | -           | 2437            |
| protein_coding                                           | DNA primase subunit 1 [Source:HGNC              |             |             |                 |
| Symbol;Acc:HGNC:9369]                                    | -                                               | 693         | 623         | 423 400 397     |
| 270                                                      | 13.92535864                                     | 12.11320196 | 10.7992025  |                 |
| 9.120455019                                              | 10.01341782                                     | 5.151565821 |             |                 |
| ENSG00000122870                                          | 638.70468                                       | 438.0726008 | 657.9702738 |                 |
| 530.4158694                                              | 329.8911383                                     | 208.758649  | 578.2491849 |                 |
| 356.3552189                                              | 0.699173179                                     | 0.020340283 | 0.114841767 | BICC1           |
| 10                                                       | 58513140                                        | 58831437    | +           | 6569            |
| protein_coding                                           | BicC family RNA binding protein 1 [Source:HGNC  |             |             |                 |
| Symbol;Acc:HGNC:19351]                                   | -                                               | 704         | 495         | 566 512 289     |
| 242                                                      | 5.248099748                                     | 3.570527463 | 5.360731012 |                 |
| 4.33094574                                               | 2.704244413                                     | 1.712959608 |             |                 |
| ENSG00000179965                                          | 201.4097144                                     | 277.0034829 | 189.4861389 |                 |
| 375.0205952                                              | 328.7496465                                     | 314.0006125 | 222.6331121 |                 |
| 339.2569514                                              | -0.605556245                                    | 0.020363872 | 0.114938269 | ZNF771          |
| 16                                                       | 30407297                                        | 30431108    | +           | 5637            |
| protein_coding                                           | zinc finger protein 771 [Source:HGNC            |             |             |                 |
| Symbol;Acc:HGNC:29653]                                   | zf-C2H2                                         | 222         | 313         | 163 362 288     |
| 364                                                      | 1.92856208                                      | 2.631011483 | 1.799063184 |                 |
| 3.568392183                                              | 3.140449493                                     | 3.002509339 |             |                 |
| ENSG00000074582                                          | 476.3067571                                     | 579.6718253 | 490.5714763 |                 |
| 570.8186407                                              | 741.9696883                                     | 856.600572  | 515.5166862 |                 |
| 723.1296337                                              | -0.488416084                                    | 0.020379364 | 0.114958389 | BCS1L           |
| 2                                                        | 218658764                                       | 218663443   | +           | 3379            |
| protein_coding                                           | "BCS1 homolog, ubiquinol-cytochrome c reductase |             |             |                 |
| complex chaperone [Source:HGNC                           | Symbol;Acc:HGNC:1020]"                          | -           |             | 525             |
| 655                                                      | 422                                             | 551         | 650         | 993 7.608513143 |
| 9.185008214                                              | 7.770180469                                     | 9.060985819 | 11.82422064 |                 |
| 13.66444745                                              |                                                 |             |             |                 |
| ENSG00000031691                                          | 723.0790199                                     | 612.416646  | 640.5328991 |                 |
| 445.4664528                                              | 575.3118814                                     | 383.8743751 | 658.6761883 |                 |
| 468.2175698                                              | 0.494235648                                     | 0.020380435 | 0.114958389 | CENPQ           |
| 6                                                        | 49463378                                        | 49493107    | +           | 1733            |

|                                     |                                                 |             |             |       |      |             |
|-------------------------------------|-------------------------------------------------|-------------|-------------|-------|------|-------------|
| protein_coding                      | centromere protein Q [Source:HGNC               |             |             |       |      |             |
| Symbol;Acc:HGNC:21347]              | -                                               | 797         | 692         | 551   | 430  | 504         |
| 445                                 | 22.52104001                                     | 18.9205594  | 19.78153017 |       |      |             |
| 13.78738606                         | 17.87636996                                     | 11.93967393 |             |       |      |             |
| ENSG00000142751                     | 1337.287924                                     | 1491.216833 | 1131.104375 |       |      |             |
| 1524.945624                         | 1792.14217                                      | 1833.107971 | 1319.869711 |       |      |             |
| 1716.731922                         | -0.378633326                                    | 0.020392161 | 0.114987864 |       |      | GPN2        |
| 1                                   | 26876133                                        | 26890297    | -           | 4979  |      |             |
| protein_coding                      | GPN-loop GTPase 2 [Source:HGNC                  |             |             |       |      |             |
| Symbol;Acc:HGNC:25513]              | -                                               | 1474        | 1685        | 973   | 1472 | 1570        |
| 14.49719701                         | 16.03556327                                     | 12.15843173 | 16.42773647 |       |      |             |
| 19.38228103                         | 19.84485026                                     |             |             |       |      |             |
| ENSG00000078687                     | 518.9475525                                     | 442.4975766 | 509.1713427 |       |      |             |
| 381.2364061                         | 323.0421874                                     | 343.33034   | 490.2054906 |       |      |             |
| 349.2029778                         | 0.488741675                                     | 0.020404467 | 0.115020593 |       |      | TNRC6C      |
| 17                                  | 77959240                                        | 78108835    | +           | 11111 |      |             |
| protein_coding                      | trinucleotide repeat containing 6C [Source:HGNC |             |             |       |      |             |
| Symbol;Acc:HGNC:29318]              | -                                               | 572         | 500         | 438   | 368  | 283         |
| 398                                 | 2.520992564                                     | 2.132275405 | 2.452606131 |       |      |             |
| 1.840376651                         | 1.565599407                                     | 1.665562532 |             |       |      |             |
| ENSG00000151092                     | 873.6826802                                     | 908.0050271 | 741.6696726 |       |      |             |
| 1198.615549                         | 1082.134253                                     | 1029.128381 | 841.1191267 |       |      |             |
| 1103.292728                         | -0.390341812                                    | 0.020428221 | 0.115088734 |       |      | NGLY1       |
| 3                                   | 25718944                                        | 25790039    | -           | 8326  |      |             |
| protein_coding                      | N-glycanase 1 [Source:HGNC                      |             |             |       |      |             |
| Symbol;Acc:HGNC:17646]              | -                                               | 963         | 1026        | 638   | 1157 | 948         |
| 5.663938957                         | 5.838985477                                     | 4.767504578 | 7.721630151 |       |      |             |
| 6.998730831                         | 6.662466759                                     |             |             |       |      |             |
| ENSG00000253954                     | 73.48732824                                     | 36.28480128 | 79.04943219 |       |      |             |
| 30.04308635                         | 15.98088559                                     | 25.01653231 | 62.94052057 |       |      |             |
| 23.68016809                         | 1.404873037                                     | 0.020429568 | 0.115088734 |       |      |             |
| HMG1P38                             | 15                                              | 92711808    | 92712110    | +     |      | 303         |
| processed_pseudogene                | high mobility group nucleosome binding          |             |             |       |      |             |
| domain 1 pseudogene 38 [Source:HGNC | Symbol;Acc:HGNC:39422]                          |             |             |       |      | -           |
| 81                                  | 41                                              | 68          | 29          | 14    | 29   | 13.09094728 |
| 6.411618437                         | 13.96281972                                     | 5.318233643 | 2.840094347 |       |      |             |
| 4.450270276                         |                                                 |             |             |       |      |             |
| ENSG00000187079                     | 4418.312204                                     | 2765.609853 | 3500.262358 |       |      |             |
| 3208.394429                         | 2449.641463                                     | 2267.015411 | 3561.394805 |       |      |             |
| 2641.683768                         | 0.431104774                                     | 0.020475092 | 0.115252185 |       |      | TEAD1       |
| 11                                  | 12674591                                        | 12944483    | +           | 10279 |      |             |
| protein_coding                      | TEA domain transcription factor 1 [Source:HGNC  |             |             |       |      |             |
| Symbol;Acc:HGNC:11714]              | TEA                                             | 4870        | 3125        | 3011  | 3097 | 2146        |
| 2628                                | 23.20100399                                     | 14.4054091  | 18.22496639 |       |      |             |
| 16.741809                           | 12.83294142                                     | 11.88791012 |             |       |      |             |
| ENSG00000235897                     | 41.73354444                                     | 16.81490791 | 13.9498998  |       |      |             |
| 48.69051926                         | 66.20652603                                     | 82.81334835 | 24.16611738 |       |      |             |
| 65.90346455                         | -1.441841778                                    | 0.020476315 | 0.115252185 |       |      |             |
| TM4SF19-AS1                         | 3                                               | 196318330   | 196325570   | +     |      | 2136        |
| antisense                           | TM4SF19 antisense RNA 1 [Source:HGNC            |             |             |       |      |             |

|                                         |                                       |                                   |             |                |      |             |
|-----------------------------------------|---------------------------------------|-----------------------------------|-------------|----------------|------|-------------|
| Symbol;Acc:HGNC:41085]                  | -                                     | 46                                | 19          | 12             | 47   | 58          |
| 96                                      | 1.054593929                           | 0.421481768                       |             | 0.349531921    |      |             |
| 1.222668302                             | 1.669068287                           | 2.08978209                        |             |                |      |             |
| ENSG00000205758                         | 541.6288267                           | 521.2621452                       |             | 588.2207748    |      |             |
| 724.1419779                             | 838.9964937                           | 665.957343                        |             | 550.3705822    |      |             |
| 743.0319382                             | -0.432841461                          | 0.020478129                       |             | 0.115252185    |      | CRYZL1      |
| 21                                      | 33589341                              | 33643926                          |             | -              | 6177 |             |
| protein_coding                          | crystallin zeta like 1 [Source:HGNC   |                                   |             |                |      |             |
| Symbol;Acc:HGNC:2420]                   | -                                     | 597                               | 589         | 506            | 699  | 735         |
| 772                                     | 4.732879129                           | 4.518186299                       |             | 5.096590755    |      |             |
| 6.287986752                             | 7.314036073                           | 5.811265494                       |             |                |      |             |
| ENSG00000223496                         | 2111.172998                           | 2416.921763                       |             | 2016.923013    |      |             |
| 2758.784102                             | 2450.782955                           | 3095.148894                       |             | 2181.672591    |      |             |
| 2768.23865                              | -0.343591909                          | 0.020512443                       |             | 0.115408588    |      | EXOSC6      |
| 16                                      | 70246778                              | 70251930                          |             | -              | 5153 |             |
| protein_coding                          | exosome component 6 [Source:HGNC      |                                   |             |                |      |             |
| Symbol;Acc:HGNC:19055]                  | -                                     | 2327                              | 2731        | 1735           | 2663 | 2147        |
| 3588                                    | 22.11387877                           | 25.11238717                       |             | 20.94817452    |      |             |
| 28.71594201                             | 25.61057105                           | 32.37600885                       |             |                |      |             |
| ENSG00000131737                         | 0                                     | 0                                 |             | 3.48747495     |      | 8.287747959 |
| 1.141491828                             | 42.26931322                           | 1.16249165                        |             |                |      |             |
| 17.232851                               | -3.987289502                          | 0.020554915                       |             | 0.115610775    |      | KRT34       |
| 17                                      | 41377650                              | 41382403                          |             | -              | 1751 |             |
| protein_coding                          | keratin 34 [Source:HGNC               |                                   |             |                |      |             |
| Symbol;Acc:HGNC:6452]                   | -                                     |                                   |             |                |      |             |
| 0                                       | 0                                     | 3                                 | 8           | 1              | 49   | 0           |
| 0.106596257                             | 0.253872631                           | 0.035104372                       |             | 1.301190704    |      |             |
| ENSG00000147804                         | 0                                     | 0                                 |             | 34.18696033    |      | 0           |
| 0                                       | 11.39565344                           | -5.985460343                      |             | 0.020566215    |      |             |
| 0.115631335                             | SLC39A4 8                             | 144409742                         |             | 144416895      |      | -           |
| 5033                                    | protein_coding                        | solute carrier family 39 member 4 |             |                |      |             |
| [Source:HGNC                            | Symbol;Acc:HGNC:17129]                | -                                 |             | 0              | 0    | 0           |
| 33                                      | 0                                     | 0                                 |             | 0              |      | 0.364333456 |
| 0                                       | 0                                     |                                   |             |                |      |             |
| ENSG00000103145                         | 705.8412515                           | 1011.54946                        |             | 888.1436205    |      |             |
| 1045.292211                             | 1180.30255                            | 1274.980509                       |             | 868.511444     |      |             |
| 1166.858424                             | -0.426312197                          | 0.020571644                       |             | 0.115631335    |      |             |
| HCFC1R1 16                              | 3022620 3024286                       | -                                 | 1433        | protein_coding | host |             |
| cell factor C1 regulator 1 [Source:HGNC | Symbol;Acc:HGNC:21198]                | -                                 |             |                |      |             |
| 778                                     | 1143                                  | 764                               | 1009        | 1034           | 1478 | 26.58655645 |
| 37.79431521                             | 33.17065251                           |                                   | 39.12524044 |                |      | 44.35286806 |
| 47.95780106                             |                                       |                                   |             |                |      |             |
| ENSG00000136816                         | 1011.584827                           | 1120.403864                       |             | 967.1930527    |      |             |
| 1403.737311                             | 1273.90488                            | 1293.095929                       |             | 1033.060581    |      |             |
| 1323.579373                             | -0.357029902                          | 0.020588539                       |             | 0.11568954     |      | TOR1B       |
| 9                                       | 129803153                             | 129811281                         |             | +              | 2911 |             |
| protein_coding                          | torsin family 1 member B [Source:HGNC |                                   |             |                |      |             |
| Symbol;Acc:HGNC:11995]                  | -                                     | 1115                              | 1266        | 832            | 1355 | 1116        |
| 1499                                    | 18.7569122                            | 20.60715041                       |             | 17.78230142    |      |             |
| 25.86480053                             | 23.56510338                           | 23.94365496                       |             |                |      |             |
| ENSG00000162194                         | 71.67282631                           | 77.87957347                       |             | 38.36222445    |      |             |

|                                                      |                                                 |             |                            |        |
|------------------------------------------------------|-------------------------------------------------|-------------|----------------------------|--------|
| 118.1004084                                          | 120.9981338                                     | 131.1211349 | 62.63820808                |        |
| 123.406559                                           | -0.972697371                                    | 0.020604694 | 0.115743545                | LBHD1  |
| 11                                                   | 62662817                                        | 62672255    | - 3362                     |        |
| protein_coding                                       | LBH domain containing 1 [Source:HGNC            |             |                            |        |
| Symbol;Acc:HGNC:28351]                               | -                                               | 79 88       | 33 114                     | 106    |
| 152                                                  | 1.150689276                                     | 1.240256192 | 0.61069319                 |        |
| 1.884166101                                          | 1.938007781                                     | 2.102213869 |                            |        |
| ENSG00000101040                                      | 1871.658743                                     | 1434.577143 | 1893.698898                |        |
| 1475.219137                                          | 1292.168749                                     | 1209.419941 | 1733.311595                |        |
| 1325.602609                                          | 0.386729028                                     | 0.020617646 | 0.115779538                | ZMYND8 |
| 20                                                   | 47209214                                        | 47356889    | - 7625                     |        |
| protein_coding                                       | zinc finger MYND-type containing 8 [Source:HGNC |             |                            |        |
| Symbol;Acc:HGNC:9397]                                | -                                               | 2063 1621   | 1629 1424                  | 1132   |
| 1402                                                 | 13.24915142                                     | 10.07324989 | 13.29193115                |        |
| 10.37724774                                          | 9.125442628                                     | 8.549469823 |                            |        |
| ENSG00000102753                                      | 3663.479401                                     | 3118.72292  | 3086.41533                 |        |
| 3960.507556                                          | 4089.96522                                      | 4120.826719 | 3289.539217                |        |
| 4057.099832                                          | -0.302408836                                    | 0.020626663 | 0.11579341                 | KPNA3  |
| 13                                                   | 49699307                                        | 49792921    | - 4474                     |        |
| protein_coding                                       | karyopherin subunit alpha 3 [Source:HGNC        |             |                            |        |
| Symbol;Acc:HGNC:6396]                                | -                                               | 4038 3524   | 2655 3823                  | 3583   |
| 4777                                                 | 44.19763371                                     | 37.3221248  | 36.92116467                |        |
| 47.48105519                                          | 49.22641273                                     | 49.6466878  |                            |        |
| ENSG00000064687                                      | 51.71330506                                     | 57.52468495 | 61.61205744                |        |
| 26.93518087                                          | 14.83939377                                     | 0           | 56.95001582 13.92485821    |        |
| 2.042538429                                          | 0.020658932                                     | 0.11593777  | ABCA7 19                   |        |
| 1040101                                              | 1065572 +                                       | 8367        | protein_coding ATP binding |        |
| cassette subfamily A member 7 [Source:HGNC           | Symbol;Acc:HGNC:37]                             |             |                            | -      |
| 57                                                   | 65 53                                           | 26 13       | 0 0.333605936              |        |
| 0.368103569                                          | 0.39410591                                      | 0.172669497 | 0.095503864                |        |
| 0                                                    |                                                 |             |                            |        |
| ENSG00000130684                                      | 47.17705023                                     | 61.06466557 | 29.06229125                |        |
| 45.58261378                                          | 131.2715602                                     | 146.6486377 | 45.76800235                |        |
| 107.8342706                                          | -1.232346798                                    | 0.020672494 | 0.115977085                | ZNF337 |
| 20                                                   | 25674215                                        | 25696841    | - 3823                     |        |
| protein_coding                                       | zinc finger protein 337 [Source:HGNC            |             |                            |        |
| Symbol;Acc:HGNC:15809]                               | zf-C2H2                                         | 52 69       | 25 44                      | 115    |
| 170                                                  | 0.666082048                                     | 0.855206974 | 0.406857716                |        |
| 0.639529264                                          | 1.849016993                                     | 2.06764341  |                            |        |
| ENSG00000153048                                      | 520.7620545                                     | 660.2063842 | 752.1320975                |        |
| 405.0636815                                          | 518.23729                                       | 446.8470255 | 644.3668454                |        |
| 456.715999                                           | 0.496191453                                     | 0.02071328  | 0.116146938                |        |
| CARHSP1 16                                           | 8852942 8869012                                 | - 5577      | protein_coding             |        |
| calcium regulated heat stable protein 1 [Source:HGNC | Symbol;Acc:HGNC:17150]                          |             |                            |        |
| 518                                                  | 5.040109031                                     | 6.338180804 | 7.217893717                | 454    |
| 3.895723782                                          | 5.003830254                                     | 4.318770571 |                            |        |
| ENSG00000171931                                      | 0 0                                             | 0           | 3.107905485 25.11282022    |        |
| 0                                                    | 0                                               | 9.406908568 | -5.70430182 0.020715902    |        |
| 0.116146938                                          | FBXW10                                          | 17          | 18744024 18779349          |        |

|                         |                                                      |                                   |                |                            |             |             |                            |
|-------------------------|------------------------------------------------------|-----------------------------------|----------------|----------------------------|-------------|-------------|----------------------------|
|                         | +                                                    | 4390                              | protein_coding | F-box and WD repeat domain |             |             |                            |
| containing 10           | [Source:HGNC Symbol;Acc:HGNC:1211]                   |                                   |                |                            | -           | 0           |                            |
| 0                       | 0                                                    | 3                                 | 22             | 0                          | 0           | 0           | 0                          |
| 0.037972464             |                                                      | 0.308038869                       | 0              |                            |             |             |                            |
| ENSG00000202474         | 29.93928188                                          |                                   | 22.12487883    |                            | 32.5497662  |             |                            |
| 55.94229872             | 50.22564044                                          |                                   | 101.7914073    |                            | 28.2046423  |             |                            |
| 69.31978217             | -1.303946463                                         |                                   | 0.020767836    |                            | 0.116401218 |             |                            |
| RNA5SP283               | 9                                                    | 62802320                          |                | 62802438                   | -           |             | 119                        |
|                         | rRNA_pseudogene                                      | "RNA, 5S ribosomal pseudogene 283 |                |                            |             |             | [Source:HGNC               |
| Symbol;Acc:HGNC:43183]" | -                                                    | 33                                | 25             | 28                         | 54          | 44          |                            |
| 118                     | 13.57987155                                          |                                   | 9.954500852    |                            | 14.6392193  |             |                            |
| 25.21499243             | 22.72757373                                          |                                   | 46.10691493    |                            |             |             |                            |
| ENSG00000026950         | 175.0994364                                          |                                   | 153.9891566    |                            | 260.3981296 |             |                            |
| 119.1363769             | 65.06503421                                          |                                   | 136.2969692    |                            | 196.4955742 |             |                            |
| 106.8327934             | 0.873209931                                          |                                   | 0.020803377    |                            | 0.116563035 |             | BTN3A1                     |
| 6                       | 26402237                                             |                                   | 26415216       |                            | + 5547      |             |                            |
| protein_coding          | butyrophilin subfamily 3 member A1                   |                                   |                |                            |             |             | [Source:HGNC               |
| Symbol;Acc:HGNC:1138]"  | -                                                    | 193                               | 174            | 224                        | 115         | 57          |                            |
| 158                     | 1.703836143                                          |                                   | 1.486337802    |                            | 2.512445785 |             |                            |
| 1.151997981             | 0.631631892                                          |                                   | 1.324432835    |                            |             |             |                            |
| ENSG00000085721         | 1419.847762                                          |                                   | 1309.792827    |                            | 1143.891783 |             |                            |
| 1737.319166             | 1638.040773                                          |                                   | 1572.59098     |                            | 1291.177457 |             |                            |
| 1649.316973             | -0.352404203                                         |                                   | 0.020811592    |                            | 0.116563035 |             | RRN3                       |
| 16                      | 15060022                                             |                                   | 15094317       |                            | - 4156      |             |                            |
| protein_coding          | "RRN3 homolog, RNA polymerase I transcription factor |                                   |                |                            |             |             | [Source:HGNC               |
| Symbol;Acc:HGNC:30346]" | -                                                    | 1565                              | 1480           | 984                        |             |             |                            |
| 1677                    | 1435                                                 | 1823                              | 18.44027895    |                            | 16.87378912 |             |                            |
| 14.73080248             | 22.42175317                                          |                                   | 21.22382824    |                            | 20.3958659  |             |                            |
| ENSG000000204568        | 1896.154519                                          |                                   | 1989.469104    |                            | 2137.822144 |             |                            |
| 2414.842562             | 2481.603234                                          |                                   | 2553.411574    |                            | 2007.815256 |             |                            |
| 2483.28579              | -0.307013062                                         |                                   | 0.020816475    |                            | 0.116563035 |             |                            |
| MRPS18B 6               | 30617709                                             |                                   | 30626395       |                            | + 1888      |             |                            |
| protein_coding          | mitochondrial ribosomal protein S18B                 |                                   |                |                            |             |             | [Source:HGNC               |
| Symbol;Acc:HGNC:14516]" | -                                                    | 2090                              | 2248           | 1839                       | 2331        | 2174        |                            |
| 2960                    | 54.2091977                                           |                                   | 56.41839898    |                            | 60.6019482  |             |                            |
| 68.60445636             | 70.77907946                                          |                                   | 72.8988604     |                            |             |             |                            |
| ENSG000000132003        | 329.3321007                                          |                                   | 421.2576929    |                            | 478.9465598 |             |                            |
| 287.9992416             | 301.3538426                                          |                                   | 242.4015717    |                            | 409.8454511 |             |                            |
| 277.251552              | 0.563952578                                          |                                   | 0.020871949    |                            | 0.116836679 |             | ZSWIM4                     |
| 19                      | 13795460                                             |                                   | 13832230       |                            | + 4713      |             |                            |
| protein_coding          | zinc finger SWIM-type containing 4                   |                                   |                |                            |             |             | [Source:HGNC               |
| Symbol;Acc:HGNC:25704]" | -                                                    | 363                               | 476            | 412                        | 278         | 264         |                            |
| 281                     | 3.771706314                                          |                                   | 4.785595131    |                            | 5.438844258 |             |                            |
| 3.277626028             | 3.443133385                                          |                                   | 2.772297915    |                            |             |             |                            |
| ENSG000000147255        | 5.443505796                                          |                                   | 9.734946684    |                            | 6.974949899 |             | 0                          |
| 0                       | 0                                                    | 7.38446746                        | 0              | 5.318057279                |             |             |                            |
| 0.020879221             | 1                                                    | IGSF1 X                           |                | 131273506                  |             | 131578899   |                            |
| -                       | 7051                                                 | protein_coding                    |                |                            |             |             | immunoglobulin superfamily |
| member 1                | [Source:HGNC Symbol;Acc:HGNC:5948]"                  | -                                 | 6              | 11                         |             |             |                            |
| 6                       | 0                                                    | 0                                 | 0              | 0.041670549                |             | 0.073921098 |                            |

|                 |                                                                                         |             |             |             |                |             |
|-----------------|-----------------------------------------------------------------------------------------|-------------|-------------|-------------|----------------|-------------|
| 0.052942858     | 0                                                                                       | 0           | 0           |             |                |             |
| ENSG00000133812 | 926.3032363                                                                             | 768.1757929 | 1192.716433 |             |                |             |
| 795.6238041     | 672.3386868                                                                             | 608.1605269 | 962.3984873 |             |                |             |
| 692.0410059     | 0.475107699                                                                             | 0.020976461 | 0.117384569 | SBF2        |                |             |
| 11              | 9778667                                                                                 | 10294207    | -           | 16767       | protein_coding |             |
|                 | SET binding factor 2 [Source:HGNC Symbol;Acc:HGNC:2135] -                               |             |             |             |                |             |
| 1021            | 868                                                                                     | 1026        | 768         | 589         | 705            | 2.981941103 |
|                 | 2.452961894                                                                             | 3.807139962 | 2.545176469 | 2.159271689 |                |             |
|                 | 1.95508107                                                                              |             |             |             |                |             |
| ENSG00000131351 | 432.7587108                                                                             | 589.406772  | 440.5843353 |             |                |             |
| 317.0063594     | 255.6941695                                                                             | 408.0282684 | 487.5832727 |             |                |             |
| 326.9095991     | 0.575264441                                                                             | 0.02100528  | 0.117497621 | HAUS8       |                |             |
| 19              | 17049729                                                                                | 17075625    | -           | 5533        |                |             |
|                 | protein_coding HAUS augmin like complex subunit 8 [Source:HGNC Symbol;Acc:HGNC:30532] - |             |             |             |                |             |
| 473             | 4.221690511                                                                             | 5.703481009 | 4.261724648 | 379         | 306            | 224         |
| 3.073072455     | 2.488483172                                                                             | 3.974948339 |             |             |                |             |
| ENSG00000111912 | 397.3759231                                                                             | 371.6979643 | 356.8849365 |             |                |             |
| 563.5668612     | 518.23729                                                                               | 477.9020311 | 375.319608  |             |                |             |
| 519.9020608     | -0.469168223                                                                            | 0.021009948 | 0.117497621 | NCOA7       |                |             |
| 6               | 125781161                                                                               | 125932030   | +           | 7820        |                |             |
|                 | protein_coding nuclear receptor coactivator 7 [Source:HGNC Symbol;Acc:HGNC:21081] -     |             |             |             |                |             |
| 554             | 2.742812001                                                                             | 2.544889783 | 2.442521915 | 307         | 544            | 454         |
| 3.865486762     | 3.568588405                                                                             | 3.294079147 |             |             |                |             |
| ENSG00000225806 | 3.629003864                                                                             | 0.884995153 | 1.16249165  |             |                |             |
| 18.64743291     | 20.54685291                                                                             | 8.626390453 | 1.892163556 |             |                |             |
| 15.94022542     | -3.057506433                                                                            | 0.02102452  | 0.11754195  |             |                |             |
| AL121917.1      | 20                                                                                      | 58863528    | 58888809    | -           | 1521           |             |
|                 | antisense uncharacterized LOC101927932 [Source:NCBI gene;Acc:101927932] -               |             |             |             |                |             |
| 10              | 0.128783274                                                                             | 0.03115281  | 0.040905116 | 1           | 18             | 18          |
| 0.657590204     | 0.727429068                                                                             | 0.305704481 |             |             |                |             |
| ENSG00000185567 | 1033.35885                                                                              | 1045.179276 | 873.0312291 |             |                |             |
| 1635.794253     | 1133.501385                                                                             | 1199.068273 | 983.8564517 |             |                |             |
| 1322.787971     | -0.426450962                                                                            | 0.02106265  | 0.117717917 | AHNAK2      |                |             |
| 14              | 104937244                                                                               | 104978357   | -           | 18771       |                |             |
|                 | protein_coding AHNAK nucleoprotein 2 [Source:HGNC Symbol;Acc:HGNC:20125] -              |             |             |             |                |             |
| 1390            | 2.971426539                                                                             | 2.981185009 | 2.489197602 | 751         | 1579           | 993         |
| 4.674194327     | 3.251690476                                                                             | 3.443169548 |             |             |                |             |
| ENSG00000116996 | 0.907250966                                                                             | 0           | 1.16249165  | 0           |                |             |
| 33.10326302     | 9.489029498                                                                             | 0.689914205 |             |             |                |             |
| 14.19743084     | -4.401422807                                                                            | 0.021082295 | 0.117790499 | ZP4         |                |             |
| 1               | 237877864                                                                               | 237890922   | -           | 2474        |                |             |
|                 | protein_coding zona pellucida glycoprotein 4 [Source:HGNC Symbol;Acc:HGNC:15770] -      |             |             |             |                |             |
| 11              | 0.019793791                                                                             | 0           | 0.025148214 | 1           | 0              | 29          |
| 0.720519374     | 0.20673976                                                                              |             |             |             |                |             |
| ENSG00000158373 | 100.7048572                                                                             | 100.8894475 | 117.4116566 |             |                |             |



|                                              |                                       |                                     |             |                    |                      |
|----------------------------------------------|---------------------------------------|-------------------------------------|-------------|--------------------|----------------------|
| 174.0427071                                  | 173.5067579                           | 182.0168386                         | 106.3353204 |                    |                      |
| 176.5221012                                  | -0.733169663                          | 0.021114663                         | 0.117934094 |                    |                      |
| HIST1H2BD                                    | 6                                     | 26158146                            | 26171349    | +                  | 871                  |
| protein_coding                               | histone cluster 1 H2B family member d |                                     |             |                    |                      |
| [Source:HGNC Symbol;Acc:HGNC:4747]           | -                                     | 111                                 | 114         |                    | 101                  |
| 168                                          | 152                                   | 211                                 | 6.240702895 | 6.201734033        |                      |
| 7.214563585                                  | 10.71773884                           |                                     | 10.72686446 | 11.26406942        |                      |
| ENSG00000101544                              | 1395.351986                           |                                     | 1282.357977 | 1199.691383        |                      |
| 1506.298192                                  | 1689.407906                           |                                     | 1732.179203 | 1292.467115        |                      |
| 1642.628433                                  | -0.34558396                           | 0.021143696                         | 0.118058976 |                    | ADNP2                |
| 18                                           | 80109031                              | 80147523                            | +           | 5893               |                      |
| protein_coding                               | ADNP homeobox 2                       | [Source:HGNC Symbol;Acc:HGNC:23803] |             |                    |                      |
| Others                                       | 1538                                  | 1449                                | 1032        | 1454               | 1480 2008            |
| 12.78052158                                  | 11.65087077                           |                                     | 10.8955737  | 13.71008064        |                      |
| 15.43734587                                  | 15.84376111                           |                                     |             |                    |                      |
| ENSG00000127452                              | 449.0892282                           | 543.387024                          |             | 514.9838009        |                      |
| 425.7830514                                  | 333.3156138                           | 285.533524                          |             | 502.4866844        |                      |
| 348.2107297                                  | 0.529979035                           | 0.021167896                         |             | 0.118156807        | FBXL12               |
| 19                                           | 9810267                               | 9827816                             | -           | 2913               | protein_coding F-box |
| and leucine rich repeat protein 12           | [Source:HGNC                          |                                     |             |                    |                      |
| Symbol;Acc:HGNC:13611]                       | -                                     | 495                                 | 614         | 443                | 411 292              |
| 331                                          | 8.321342505                           | 9.987443313                         |             | 9.46171992         |                      |
| 7.839951588                                  | 6.161546453                           | 5.283461259                         |             |                    |                      |
| ENSG00000149927                              | 3.629003864                           | 3.539980612                         | 0           | 24.86324388        |                      |
| 14.83939377                                  | 15.52750281                           | 2.389661492                         |             | 18.41004682        |                      |
| -2.907512509                                 | 0.021174866                           | 0.118158423                         |             | DOC2A              | 16                   |
| 30005509                                     | 30023270                              | -                                   | 6426        | protein_coding     |                      |
| double C2 domain alpha                       | [Source:HGNC Symbol;Acc:HGNC:2985]    |                                     |             |                    |                      |
| -                                            | 4                                     | 4                                   | 0           | 24                 | 13 18                |
| 0.030482315                                  | 0.029494817                           | 0                                   | 0.207530802 | 0.124351203        |                      |
| 0.130245522                                  |                                       |                                     |             |                    |                      |
| ENSG00000104976                              | 861.8884177                           | 993.849557                          |             | 1105.529559        |                      |
| 1190.327801                                  | 1230.528191                           | 1467.349016                         |             | 987.0891779        |                      |
| 1296.068336                                  | -0.394088506                          | 0.021190411                         |             | 0.118207877        | SNAPC2               |
| 19                                           | 7920316                               | 7923250                             | +           | 2000               | protein_coding small |
| nuclear RNA activating complex polypeptide 2 | [Source:HGNC                          |                                     |             |                    |                      |
| Symbol;Acc:HGNC:11135]                       | -                                     | 950                                 | 1123        | 951                | 1149 1078            |
| 1701                                         | 23.26067392                           | 26.60579261                         |             | 29.58403229        |                      |
| 31.92288083                                  | 33.1311206                            | 39.5462526                          |             |                    |                      |
| ENSG00000262370                              | 6.350756762                           | 5.309970919                         |             | 10.46242485        | 0                    |
| 0                                            | 0                                     | 7.374384177                         | 0           | 5.313066279        |                      |
| 0.021207893                                  | 1                                     | AC108134.3                          | 16          | 3076911            | 3087100 -            |
| 1326                                         | lincRNA uncharacterized LOC105371058  | [Source:NCBI                        |             |                    |                      |
| gene;Acc:105371058]                          | -                                     | 7                                   | 6           | 9                  | 0 0                  |
| 0                                            | 0.258513483                           | 0.214404634                         |             | 0.422285172        | 0                    |
| 0                                            | 0                                     |                                     |             |                    |                      |
| ENSG00000260641                              | 10.88701159                           | 15.92991276                         | 0           | 0                  | 0                    |
| 0                                            | 8.938974783                           | 0                                   | 5.597586726 | 0.021238922        |                      |
| 0.118441136                                  | AC114811.2                            | 4                                   |             | 98658904           |                      |
| 98664550                                     | +                                     | 5647                                | antisense   | "novel transcript, |                      |

|                                                  |                                                  |             |             |                  |             |       |
|--------------------------------------------------|--------------------------------------------------|-------------|-------------|------------------|-------------|-------|
| antisense TSPAN5"                                | -                                                | 12          | 18          | 0                | 0           | 0     |
| 0                                                | 0.104061994                                      | 0.151036237 | 0           | 0                | 0           | 0     |
| 0                                                |                                                  |             |             |                  |             |       |
| ENSG00000284726                                  | 18.14501932                                      | 18.58489822 | 12.78740815 | 0                |             |       |
| 0                                                | 4.313195226                                      | 16.50577523 | 1.437731742 |                  |             |       |
| 3.447943707                                      | 0.02126486                                       | 0.11854841  | AL109936.6  |                  |             | 1     |
| 23297797                                         | 23302866                                         | +           | 604         | lincRNA          | novel       |       |
| transcript                                       | -                                                | 20          | 21          | 11               | 0           | 5     |
| 1.621517875                                      | 1.647436929                                      | 1.133085268 | 0           | 0                | 0           | 0     |
| 0.384914334                                      |                                                  |             |             |                  |             |       |
| ENSG00000116793                                  | 1554.120905                                      | 1397.407347 | 1317.103039 |                  |             |       |
| 1276.313186                                      | 1013.644743                                      | 973.9194821 | 1422.877097 |                  |             |       |
| 1087.959137                                      | 0.387733328                                      | 0.021305345 | 0.118714448 |                  |             | PHTF1 |
| 1                                                | 113696831                                        | 113759489   | -           | 7170             |             |       |
| protein_coding                                   | putative homeodomain transcription factor 1      |             |             |                  |             |       |
| [Source:HGNC Symbol;Acc:HGNC:8939]               |                                                  | -           | 1713        | 1579             |             | 1133  |
| 1232                                             | 888                                              | 1129        | 11.69948893 | 10.434927        |             |       |
| 9.831450587                                      | 9.547806214                                      | 7.61274303  | 7.321596728 |                  |             |       |
| ENSG00000137221                                  | 784.7720856                                      | 926.5899253 | 913.7184368 |                  |             |       |
| 942.7313304                                      | 1122.086467                                      | 1550.162364 | 875.0268159 |                  |             |       |
| 1204.993387                                      | -0.462598832                                     | 0.021308066 | 0.118714448 |                  |             | TJAP1 |
| 6                                                | 43477523                                         | 43506556    | +           | 6741             |             |       |
| protein_coding                                   | tight junction associated protein 1 [Source:HGNC |             |             |                  |             |       |
| Symbol;Acc:HGNC:17949]                           | -                                                | 865         | 1047        | 786              | 910         | 983   |
| 1797                                             | 6.283772653                                      | 7.359508231 | 7.254459584 |                  |             |       |
| 7.501171741                                      | 8.963477876                                      | 12.39523509 |             |                  |             |       |
| ENSG00000139921                                  | 2336.171237                                      | 2275.322539 | 2011.110554 |                  |             |       |
| 2089.548454                                      | 1486.22236                                       | 1472.52485  | 2207.534777 |                  |             |       |
| 1682.765222                                      | 0.39197534                                       | 0.021326322 | 0.11877875  |                  |             | TMX1  |
| 14                                               | 51240162                                         | 51257546    | +           | 4499             |             |       |
| protein_coding                                   | thioredoxin related transmembrane protein 1      |             |             |                  |             |       |
| [Source:HGNC Symbol;Acc:HGNC:15487]              |                                                  | -           | 2575        | 2571             |             | 1730  |
| 2017                                             | 1302                                             | 1707        | 28.02785898 | 27.07774689      |             |       |
| 23.92417423                                      | 24.91161874                                      | 17.78862383 | 17.64202959 |                  |             |       |
| ENSG00000143196                                  | 35.38278767                                      | 23.89486913 | 30.2247829  |                  |             | 0     |
| 12.55641011                                      | 0                                                | 29.83414657 | 4.185470037 |                  |             |       |
| 2.870516968                                      | 0.021393097                                      | 0.119113156 | DPT         | 1                |             |       |
| 168695459                                        | 168729264                                        | -           | 1786        | protein_coding   |             |       |
| dermatopontin [Source:HGNC Symbol;Acc:HGNC:3011] |                                                  | -           |             |                  |             | 39    |
| 27                                               | 26                                               | 0           | 11          | 0                | 1.069330209 |       |
| 0.71632276                                       | 0.905729973                                      | 0           | 0.378580805 | 0                |             |       |
| ENSG00000233589                                  | 9.979760626                                      | 16.81490791 | 0           | 0                | 0           | 0     |
| 0                                                | 8.931556178                                      | 0           | 5.596416401 | 0.021406924      |             |       |
| 0.119152635                                      | AL138789.1                                       | 1           | 68479129    |                  |             |       |
| 68483539                                         | +                                                | 960         | antisense   | novel transcript |             |       |
| -                                                | 11                                               | 19          | 0           | 0                | 0           | 0     |
| 0.561112748                                      | 0.937796934                                      | 0           | 0           | 0                | 0           |       |
| ENSG00000269834                                  | 9.979760626                                      | 14.15992245 | 34.8747495  |                  |             |       |
| 59.05020421                                      | 38.81072216                                      | 73.32431885 | 19.67147752 |                  |             |       |
| 57.06174841                                      | -1.553101222                                     | 0.02142674  | 0.11922542  |                  |             |       |

|                                                    |                                               |                        |                     |                |           |
|----------------------------------------------------|-----------------------------------------------|------------------------|---------------------|----------------|-----------|
| ZNF528-AS1                                         | 19                                            | 52388842               | 52397766            | -              | 4160      |
| processed_transcript                               |                                               | ZNF528 antisense RNA 1 |                     | [Source:HGNC   |           |
| Symbol;Acc:HGNC:51305]                             | -                                             | 11                     | 16                  | 30             | 57        |
| 85                                                 | 0.129487557                                   | 0.182243939            | 0.448677995         |                | 34        |
| 0.761366158                                        | 0.5023807                                     | 0.950072206            |                     |                |           |
| ENSG00000170876                                    | 3258.84547                                    | 3647.065026            | 3450.275217         |                |           |
| 4245.398892                                        | 4379.904145                                   | 4012.996839            | 3452.061904         |                |           |
| 4212.766625                                        | -0.287166089                                  | 0.021454489            | 0.119342281         |                | TMEM43    |
| 3                                                  | 14124940                                      | 14143679               | +                   | 3572           |           |
| protein_coding                                     | transmembrane protein 43                      |                        |                     | [Source:HGNC   |           |
| Symbol;Acc:HGNC:28472]                             | -                                             | 3592                   | 4121                | 2968           | 4098      |
| 4652                                               | 49.24402706                                   | 54.66603878            | 51.69628001         |                | 3837      |
| 63.7488783                                         | 66.0279341                                    | 60.55629193            |                     |                |           |
| ENSG00000285517                                    | 170.5631816                                   | 124.7843166            | 137.1740147         |                |           |
| 326.3300759                                        | 196.3365944                                   | 200.1322585            | 144.1738376         |                |           |
| 240.9329763                                        | -0.740139987                                  | 0.021495947            | 0.119535303         |                |           |
| LINC00941                                          | 12                                            | 30795458               | 30879268            | +              | 18914     |
| lincRNA long intergenic non-protein coding RNA 941 |                                               |                        |                     |                |           |
| [Source:NCBI gene;Acc:100287314]                   |                                               | -                      | 188                 | 141            | 118       |
| 315                                                | 172                                           | 232                    | 0.486746848         | 0.353233731    |           |
| 0.388155254                                        | 0.925420707                                   | 0.558975049            | 0.570342347         |                |           |
| ENSG00000171530                                    | 1105.938928                                   | 1300.942875            | 1493.80177          |                |           |
| 940.6593934                                        | 997.6638578                                   | 1041.205328            | 1300.227858         |                |           |
| 993.1761929                                        | 0.387768385                                   | 0.021503716            | 0.119540927         |                | TBCA      |
| 5                                                  | 77691166                                      | 77868780               | -                   | 3058           |           |
| protein_coding                                     | tubulin folding cofactor A                    |                        |                     | [Source:HGNC   |           |
| Symbol;Acc:HGNC:11579]                             | -                                             | 1219                   | 1470                | 1285           | 908       |
| 1207                                               | 19.52067847                                   | 22.77751254            | 26.14402759         |                | 874       |
| 16.49910594                                        | 17.5679591                                    | 18.35273557            |                     |                |           |
| ENSG00000105997                                    | 21.77402318                                   | 12.38993214            | 26.73730795         |                |           |
| 2.07193699                                         | 0                                             | 6.038473317            | 20.30042109         | 2.703470102    |           |
| 2.863399667                                        | 0.021514525                                   | 0.11956344             | HOXA3               | 7              |           |
| 27106184                                           | 27152581                                      | -                      | 4306                | protein_coding |           |
| homeobox A3 [Source:HGNC Symbol;Acc:HGNC:5104]     |                                               |                        | Homeobox            |                |           |
| 24                                                 | 14                                            | 23                     | 2                   | 0              | 7         |
| 0.15405665                                         | 0.332323197                                   | 0.025808812            | 0                   | 0.272939191    |           |
| 0.075588379                                        |                                               |                        |                     |                |           |
| ENSG00000205403                                    | 4.53625483                                    | 7.079961225            | 10.46242485         | 0              |           |
| 0                                                  | 0                                             | 7.359546968            | 0                   | 5.31027471     |           |
| 0.021547682                                        | 1                                             | CFI                    | 4                   | 109740694      | 109802179 |
| -                                                  | 4875                                          | protein_coding         | complement factor I |                |           |
| [Source:HGNC Symbol;Acc:HGNC:5394]                 |                                               | -                      | 5                   | 8              | 9         |
| 0                                                  | 0                                             | 0                      | 0.050225477         | 0.077757414    |           |
| 0.114861567                                        | 0                                             | 0                      | 0                   |                |           |
| ENSG00000174738                                    | 1392.630233                                   | 1054.914223            | 1075.304776         |                |           |
| 1112.630164                                        | 760.2335576                                   | 571.067048             | 1174.283077         |                |           |
| 814.6435897                                        | 0.528440572                                   | 0.02156116             | 0.119784976         |                | NR1D2     |
| 3                                                  | 23945260                                      | 23980618               | +                   | 5820           |           |
| protein_coding                                     | nuclear receptor subfamily 1 group D member 2 |                        |                     |                |           |
| [Source:HGNC Symbol;Acc:HGNC:7963]                 |                                               | THR-like               |                     | 1535           | 1192      |

|                                     |                                                       |          |             |             |             |             |        |
|-------------------------------------|-------------------------------------------------------|----------|-------------|-------------|-------------|-------------|--------|
|                                     | 925                                                   | 1074     | 666         | 662         | 12.9155849  | 9.704646301 |        |
|                                     | 9.888390181                                           |          | 10.25400064 |             | 7.033939114 | 5.288908126 |        |
| ENSG0000091483                      | 2521.250434                                           |          |             | 2395.681879 |             | 2921.341516 |        |
| 2083.332643                         | 2175.683424                                           |          |             | 2010.811615 |             | 2612.757943 |        |
| 2089.942561                         | 0.321869619                                           |          |             | 0.021605687 |             | 0.119994659 | FH     |
| 1                                   | 241497603                                             |          |             | 241519761   |             | - 2142      |        |
| protein_coding                      | fumarate hydratase [Source:HGNC Symbol;Acc:HGNC:3700] |          |             |             |             |             |        |
| -                                   | 2779                                                  | 2707     |             | 2513        | 2011        | 1906        | 2331   |
| 63.53276606                         | 59.8818529                                            |          |             | 72.99277399 |             | 52.16805532 |        |
| 54.69539839                         | 50.60038546                                           |          |             |             |             |             |        |
| ENSG00000165669                     | 909.9727189                                           |          |             | 826.585473  |             | 982.3054442 |        |
| 707.566482                          | 678.0461459                                           |          |             | 690.1112362 |             | 906.2878787 |        |
| 691.9079547                         | 0.388730342                                           |          |             | 0.021616342 |             | 0.120016155 |        |
| FAM204A 10                          | 118297930                                             |          |             | 118342328   |             | - 15018     |        |
| protein_coding                      | family with sequence similarity 204 member A          |          |             |             |             |             |        |
| [Source:HGNC Symbol;Acc:HGNC:25794] | -                                                     |          |             | -           |             | 1003        | 934    |
| 683                                 | 594                                                   | 800      |             | 3.270525326 |             | 2.946871625 | 845    |
| 3.50067228                          | 2.52708964                                            |          |             | 2.431205699 |             | 2.476902464 |        |
| ENSG00000149262                     | 1250.191831                                           |          |             | 1026.594378 |             | 1156.679192 |        |
| 1449.319924                         | 1342.39439                                            |          |             | 1640.739464 |             | 1144.488467 |        |
| 1477.484593                         | -0.36905938                                           |          |             | 0.021652575 |             | 0.120179603 | INTS4  |
| 11                                  | 77878720                                              |          |             | 77994678    |             | - 6074      |        |
| protein_coding                      | integrator complex subunit 4 [Source:HGNC             |          |             |             |             |             |        |
| Symbol;Acc:HGNC:25048]              | -                                                     |          |             | 1378        | 1160        | 995         | 1399   |
| 1902                                | 11.10972                                              |          |             | 9.049188657 |             | 10.19189967 | 1176   |
| 12.79837911                         | 11.90090242                                           |          |             | 14.56017997 |             |             |        |
| ENSG00000167107                     | 542.5360777                                           |          |             | 582.3268108 |             | 602.1706746 |        |
| 473.4376022                         | 416.6445173                                           |          |             | 357.1325647 |             | 575.6778544 |        |
| 415.7382281                         | 0.470209475                                           |          |             | 0.021660399 |             | 0.120185317 | ACSF2  |
| 17                                  | 50426158                                              |          |             | 50474845    |             | + 5797      |        |
| protein_coding                      | acyl-CoA synthetase family member 2 [Source:HGNC      |          |             |             |             |             |        |
| Symbol;Acc:HGNC:26101]              | -                                                     |          |             | 598         | 658         | 518         | 457    |
| 414                                 | 5.05157223                                            |          |             | 5.378349669 |             | 5.559468911 | 365    |
| 4.380512696                         | 3.87023133                                            |          |             | 3.320687894 |             |             |        |
| ENSG00000152133                     | 895.4567034                                           |          |             | 634.5415248 |             | 742.8321643 |        |
| 628.8328764                         | 478.285076                                            |          |             | 530.5230128 |             | 757.6101308 |        |
| 545.8803218                         | 0.472668746                                           |          |             | 0.021716548 |             | 0.120453714 |        |
| GPATCH11                            | 2                                                     | 37084451 |             | 37099244    |             | + 4040      |        |
| protein_coding                      | G-patch domain containing 11 [Source:HGNC             |          |             |             |             |             |        |
| Symbol;Acc:HGNC:26768]              | -                                                     |          |             | 987         | 717         | 639         | 607    |
| 615                                 | 11.96367127                                           |          |             | 8.409384913 |             | 9.840707872 | 419    |
| 8.348709883                         | 6.374997489                                           |          |             | 7.078231602 |             |             |        |
| ENSG00000071859                     | 2628.306048                                           |          |             | 3194.832503 |             | 3359.600868 |        |
| 3213.574271                         | 3886.779675                                           |          |             | 4960.17451  |             | 3060.91314  |        |
| 4020.176152                         | -0.393722515                                          |          |             | 0.021722389 |             | 0.120453714 | FAM50A |
| X                                   | 154444126                                             |          |             | 154450654   |             | + 2567      |        |
| protein_coding                      | family with sequence similarity 50 member A           |          |             |             |             |             |        |
| [Source:HGNC Symbol;Acc:HGNC:18786] | -                                                     |          |             | -           |             | 2897        | 3610   |
| 3102                                | 3405                                                  | 5750     |             | 55.26514452 |             | 66.63582425 | 2890   |
| 70.04527113                         | 67.14720942                                           |          |             | 81.53397348 |             | 104.1532903 |        |

|                                                             |                                             |                                         |                                      |           |             |             |       |
|-------------------------------------------------------------|---------------------------------------------|-----------------------------------------|--------------------------------------|-----------|-------------|-------------|-------|
| ENSG00000138771                                             | 241.328757                                  |                                         | 229.2137447                          |           | 242.9607548 |             |       |
| 197.8699825                                                 | 93.60232991                                 |                                         | 130.2584958                          |           | 237.8344188 |             |       |
| 140.5769361                                                 | 0.757496488                                 |                                         | 0.021763527                          |           | 0.120641071 |             |       |
| SHROOM3 4                                                   | 76435100                                    |                                         | 76783253                             |           | +           | 13958       |       |
| protein_coding                                              | shroom family member 3 [Source:HGNC         |                                         |                                      |           |             |             |       |
| Symbol;Acc:HGNC:30422]                                      | -                                           |                                         | 266                                  | 259       | 209         | 191         | 82    |
| 151                                                         | 0.933226637                                 |                                         | 0.879231038                          |           | 0.931600984 |             |       |
| 0.760365173                                                 | 0.361108756                                 |                                         | 0.503019442                          |           |             |             |       |
| ENSG00000169551                                             | 15.42326642                                 |                                         | 2.654985459                          |           | 4.6499666   |             | 0     |
| 0                                                           | 0                                           | 7.576072827                             | 0                                    |           | 5.356303036 |             |       |
| 0.02176563                                                  | 1                                           | CT55                                    | X                                    | 135156536 |             | 135171398   |       |
| -                                                           | 1732                                        | protein_coding cancer/testis antigen 55 |                                      |           |             |             |       |
| [Source:HGNC Symbol;Acc:HGNC:26047]                         | -                                           |                                         | 17                                   | 3         |             |             | 4     |
| 0                                                           | 0                                           | 0                                       | 0.480650853                          |           | 0.082072905 |             |       |
| 0.143687487                                                 | 0                                           | 0                                       | 0                                    |           |             |             |       |
| ENSG00000158417                                             | 3697.954937                                 |                                         | 2983.318661                          |           | 3003.878423 |             |       |
| 2729.776984                                                 | 2424.528643                                 |                                         | 2566.35116                           |           | 3228.384007 |             |       |
| 2573.552262                                                 | 0.327143092                                 |                                         | 0.021769817                          |           | 0.120641071 |             | EIF5B |
| 2                                                           | 99337353                                    |                                         | 99401326                             |           | +           | 7883        |       |
| protein_coding                                              | eukaryotic translation initiation factor 5B |                                         |                                      |           |             |             |       |
| [Source:HGNC Symbol;Acc:HGNC:30793]                         | -                                           |                                         | 4076                                 | 3371      |             |             | 2584  |
| 2635                                                        | 2124                                        | 2975                                    | 25.3204449                           |           | 20.26252981 |             |       |
| 20.39425426                                                 | 18.5738159                                  |                                         | 16.56190717                          |           | 17.54795296 |             |       |
| ENSG00000156475                                             | 4.53625483                                  |                                         | 0.884995153                          |           | 18.5998664  |             | 0     |
| 0                                                           | 0                                           | 8.007038794                             | 0                                    |           | 5.427390316 |             |       |
| 0.021782397                                                 | 0.120672977                                 |                                         | PPP2R2B 5                            |           | 146581146   |             |       |
| 147084784                                                   | -                                           | 13206                                   | protein_coding protein phosphatase 2 |           |             |             |       |
| regulatory subunit Bbeta [Source:HGNC Symbol;Acc:HGNC:9305] | -                                           |                                         |                                      |           |             |             |       |
| 5                                                           | 1                                           | 16                                      | 0                                    | 0         | 0           | 0.018540754 |       |
| 0.003588022                                                 | 0.075379896                                 |                                         | 0                                    |           | 0           |             |       |
| ENSG00000260398                                             | 19.05227029                                 |                                         | 8.849951531                          |           | 17.43737475 |             |       |
| 34.18696033                                                 | 31.96177119                                 |                                         | 75.04959694                          |           | 15.11319886 |             |       |
| 47.06610949                                                 | -1.646783688                                |                                         | 0.02180963                           |           | 0.12078602  |             |       |
| AC068700.1                                                  | 8                                           | 78605952                                | 78609705                             |           | +           | 3754        |       |
| sense_overlapping                                           | "novel transcript, overlapping to           |                                         |                                      |           |             |             |       |
| PKIA"                                                       | -                                           | 21                                      | 10                                   | 15        | 33          | 28          | 87    |
| 0.273938902                                                 | 0.126221162                                 |                                         | 0.248601553                          |           | 0.488463048 |             |       |
| 0.458470212                                                 | 1.077596079                                 |                                         |                                      |           |             |             |       |
| ENSG00000111832                                             | 942.6337537                                 |                                         | 829.2404585                          |           | 914.8809285 |             |       |
| 668.1996792                                                 | 659.7822767                                 |                                         | 724.616798                           |           | 895.5850469 |             |       |
| 684.1995846                                                 | 0.387750393                                 |                                         | 0.021825618                          |           | 0.120791692 |             | RWDD1 |
| 6                                                           | 116571367                                   |                                         | 116597675                            |           | +           | 5909        |       |
| protein_coding                                              | RWD domain containing 1 [Source:HGNC        |                                         |                                      |           |             |             |       |
| Symbol;Acc:HGNC:20993]                                      | -                                           |                                         | 1039                                 | 937       | 787         | 645         | 578   |
| 840                                                         | 8.610537077                                 |                                         | 7.513668699                          |           | 8.286432347 |             |       |
| 6.065376556                                                 | 6.012584717                                 |                                         | 6.609921689                          |           |             |             |       |
| ENSG00000155265                                             | 320.259591                                  |                                         | 264.6135508                          |           | 420.8219773 |             |       |
| 11.39565344                                                 | 143.8279703                                 |                                         | 87.98918262                          |           | 335.2317063 |             |       |
| 81.07093547                                                 | 2.048403081                                 |                                         | 0.021827837                          |           | 0.120791692 |             |       |
| GOLGA7B 10                                                  | 97850239                                    |                                         | 97871580                             |           | +           | 6458        |       |

|                                     |                                                                |             |                                  |             |      |        |
|-------------------------------------|----------------------------------------------------------------|-------------|----------------------------------|-------------|------|--------|
| protein_coding                      | golgin A7 family member B [Source:HGNC                         |             |                                  |             |      |        |
| Symbol;Acc:HGNC:31668]              | -                                                              | 353         | 299                              | 362         | 11   | 126    |
| 102                                 | 2.676734819                                                    | 2.193812913 | 3.487525377                      |             |      |        |
| 0.094646964                         | 1.199277994                                                    | 0.734400813 |                                  |             |      |        |
| ENSG00000215838                     | 0                                                              | 0           | 0                                | 6.848950969 |      |        |
| 19.84069804                         | 0                                                              | 8.89654967  | -5.632820877                     | 0.02183114  |      |        |
| 0.120791692                         | AL451074.1                                                     | 1           | 165698750                        |             |      |        |
| 165709968                           | +                                                              | 1854        | transcribed_processed_pseudogene |             |      |        |
|                                     | carbonic anhydrase 14 pseudogene [Source:NCBI gene;Acc:440700] |             |                                  |             |      |        |
| -                                   | 0                                                              | 0           | 0                                | 0           | 6    | 23     |
| 0                                   | 0                                                              | 0           | 0.198924777                      | 0.576831707 |      |        |
| ENSG00000183527                     | 1570.451422                                                    | 1493.871818 | 1550.763861                      |             |      |        |
| 1452.42783                          | 1063.870384                                                    | 950.6282279 | 1538.362367                      |             |      |        |
| 1155.642147                         | 0.413063603                                                    | 0.021881026 | 0.121029854                      |             |      | PSMG1  |
| 21                                  | 39174769                                                       | 39183851    | -                                | 2515        |      |        |
| protein_coding                      | proteasome assembly chaperone 1 [Source:HGNC                   |             |                                  |             |      |        |
| Symbol;Acc:HGNC:3043]               | -                                                              | 1731        | 1688                             | 1334        | 1402 | 932    |
| 1102                                | 33.70449016                                                    | 31.80247308 | 33.00081662                      |             |      |        |
| 30.97576693                         | 22.77850847                                                    | 20.37392125 |                                  |             |      |        |
| ENSG00000183735                     | 894.5494525                                                    | 648.7014472 | 583.5708082                      |             |      |        |
| 569.7826722                         | 464.5871741                                                    | 471.8635578 | 708.9405693                      |             |      |        |
| 502.0778013                         | 0.49869171                                                     | 0.021892983 | 0.121058134                      |             |      | TBK1   |
| 12                                  | 64451880                                                       | 64502108    | +                                | 4762        |      |        |
| protein_coding                      | TANK binding kinase 1 [Source:HGNC                             |             |                                  |             |      |        |
| Symbol;Acc:HGNC:11584]              | -                                                              | 986         | 733                              | 502         | 550  | 407    |
| 547                                 | 10.13949225                                                    | 7.293584593 | 6.558751442                      |             |      |        |
| 6.417787634                         | 5.253544053                                                    | 5.341078406 |                                  |             |      |        |
| ENSG00000135365                     | 589.7131279                                                    | 569.0518835 | 803.2817301                      |             |      |        |
| 407.1356185                         | 486.2755188                                                    | 502.0559244 | 654.0155805                      |             |      |        |
| 465.1556872                         | 0.489952348                                                    | 0.021907941 | 0.121102988                      |             |      | PHF21A |
| 11                                  | 45929323                                                       | 46121178    | -                                | 11190       |      |        |
| protein_coding                      | PHD finger protein 21A [Source:HGNC                            |             |                                  |             |      |        |
| Symbol;Acc:HGNC:24156]              | -                                                              | 650         | 643                              | 691         | 393  | 426    |
| 582                                 | 2.8445394                                                      | 2.722747245 | 3.841977414                      |             |      |        |
| 1.951526745                         | 2.340059352                                                    | 2.418376512 |                                  |             |      |        |
| ENSG00000100207                     | 1191.220518                                                    | 815.9655312 | 913.7184368                      |             |      |        |
| 1330.183547                         | 1380.06362                                                     | 1189.579243 | 973.6348288                      |             |      |        |
| 1299.942137                         | -0.41641481                                                    | 0.021923547 | 0.121132409                      |             |      | TCF20  |
| 22                                  | 42160013                                                       | 42343616    | -                                | 7548        |      |        |
| protein_coding                      | transcription factor 20 [Source:HGNC                           |             |                                  |             |      |        |
| Symbol;Acc:HGNC:11631]              | -                                                              | 1313        | 922                              | 786         | 1284 | 1209   |
| 1379                                | 8.518468429                                                    | 5.787959324 | 6.478843675                      |             |      |        |
| 9.452467131                         | 9.845590523                                                    | 8.495000188 |                                  |             |      |        |
| ENSG00000154174                     | 4362.062644                                                    | 3981.593194 | 3368.900801                      |             |      |        |
| 5401.539732                         | 4810.246564                                                    | 4496.937343 | 3904.185547                      |             |      |        |
| 4902.90788                          | -0.328239673                                                   | 0.021926959 | 0.121132409                      |             |      | TOMM70 |
| 3                                   | 100363431                                                      | 100401398   | -                                | 5387        |      |        |
| protein_coding                      | translocase of outer mitochondrial membrane 70                 |             |                                  |             |      |        |
| [Source:HGNC Symbol;Acc:HGNC:11985] | -                                                              |             | 4808                             | 4499        |      | 2898   |
| 5214                                | 4214                                                           | 5213        | 43.70651381                      | 39.57267957 |      |        |

|                                     |                                                      |             |             |                  |
|-------------------------------------|------------------------------------------------------|-------------|-------------|------------------|
| 33.47019574                         | 53.78189431                                          | 48.08337195 | 44.99577822 |                  |
| ENSG00000104835                     | 58.06406182                                          | 87.61452016 | 46.499666   |                  |
| 19.6834014                          | 22.82983656                                          | 33.64292277 | 64.05941599 |                  |
| 25.38538691                         | 1.332933339                                          | 0.022036489 | 0.121684834 | SARS2            |
| 19                                  | 38915266                                             | 38930896    | - 3231      |                  |
| protein_coding                      | "seryl-tRNA synthetase 2, mitochondrial [Source:HGNC |             |             |                  |
| Symbol;Acc:HGNC:17697]"             | -                                                    | 64 99       | 40 19       | 20               |
| 39                                  | 0.969999922                                          | 1.45185979  | 0.77024676  |                  |
| 0.326759849                         | 0.380487504                                          | 0.561252989 |             |                  |
| ENSG0000020129                      | 1796.356913                                          | 2185.053033 | 1648.41316  |                  |
| 2251.159539                         | 2575.205564                                          | 2359.317789 | 1876.607702 |                  |
| 2395.227631                         | -0.351390344                                         | 0.022040715 | 0.121684834 | NCDN             |
| 1                                   | 35557473                                             | 35567274    | + 4917      |                  |
| protein_coding                      | neurochondrin [Source:HGNC Symbol;Acc:HGNC:17597]    |             |             |                  |
| -                                   | 1980 2469                                            | 1418 2173   | 2256 2735   |                  |
| 19.71939859                         | 23.79289689                                          | 17.94249646 | 24.55678804 |                  |
| 28.20241164                         | 25.86355031                                          |             |             |                  |
| ENSG00000254604                     | 3.629003864                                          | 7.964956378 | 10.46242485 | 0                |
| 0                                   | 0                                                    | 7.352128364 | 0           | 5.308892746      |
| 0.022058262                         | 1                                                    | AP002336.2  | 11          | 70282367         |
| 70363368                            | -                                                    | 539         | antisense   | novel transcript |
| -                                   | 4                                                    | 9           | 9           | 0                |
| 0.36341254                          | 0.791188899                                          | 1.038868531 | 0           | 0                |
| ENSG00000167513                     | 2962.174404                                          | 3849.728916 | 4036.171008 |                  |
| 3911.817037                         | 4812.529548                                          | 5290.565265 | 3616.024776 |                  |
| 4671.637283                         | -0.369831291                                         | 0.022086513 | 0.121899636 | CDT1             |
| 16                                  | 88803213                                             | 88809258    | + 3336      |                  |
| protein_coding                      | chromatin licensing and DNA replication factor 1     |             |             |                  |
| [Source:HGNC Symbol;Acc:HGNC:24576] | -                                                    |             | 3265 4350   | 3472             |
| 3776                                | 4216 6133                                            | 47.92761602 | 61.78593964 |                  |
| 64.7530935                          | 62.89527021                                          | 77.68227225 | 85.48264288 |                  |
| ENSG0000010244                      | 5186.753773                                          | 4773.663856 | 4891.764863 |                  |
| 6063.523601                         | 6442.579878                                          | 5562.296564 | 4950.727497 |                  |
| 6022.800014                         | -0.282624154                                         | 0.022099702 | 0.121934382 | ZNF207           |
| 17                                  | 32350117                                             | 32381886    | + 15834     |                  |
| protein_coding                      | zinc finger protein 207 [Source:HGNC                 |             |             |                  |
| Symbol;Acc:HGNC:12998]              | -                                                    | 5717 5394   | 4208 5853   | 5644             |
| 6448                                | 17.68097602                                          | 16.141606   | 16.53453315 |                  |
| 20.53997578                         | 21.91006796                                          | 18.93500422 |             |                  |
| ENSG00000197980                     | 33.56828574                                          | 29.20484005 | 31.38727455 |                  |
| 14.50355893                         | 3.424475485                                          | 5.175834272 | 31.38680011 |                  |
| 7.701289562                         | 2.027101826                                          | 0.022144274 | 0.122125396 | LEKR1            |
| 3                                   | 156825481                                            | 157046129   | + 5602      |                  |
| protein_coding                      | "leucine, glutamate and lysine rich 1 [Source:HGNC   |             |             |                  |
| Symbol;Acc:HGNC:33765]"             | -                                                    | 37 33       | 27 14       | 3                |
| 6                                   | 0.323435215                                          | 0.279124062 | 0.299866193 |                  |
| 0.138866335                         | 0.032917399                                          | 0.049801126 |             |                  |
| ENSG00000132386                     | 184.1719461                                          | 186.7339773 | 209.248497  |                  |
| 82.87747959                         | 94.74382174                                          | 155.2750281 | 193.3848068 |                  |
| 110.9654432                         | 0.796616508                                          | 0.02214813  | 0.122125396 |                  |

|                                                                   |                                              |          |             |                                      |                |                |             |
|-------------------------------------------------------------------|----------------------------------------------|----------|-------------|--------------------------------------|----------------|----------------|-------------|
| SERPINF1                                                          | 17                                           | 1761959  | 1777574     | +                                    | 3069           | protein_coding |             |
|                                                                   | serpin family F member 1                     |          |             | [Source:HGNC Symbol;Acc:HGNC:8824]   |                |                |             |
|                                                                   | -                                            | 203      | 211         | 180                                  | 80             | 83             | 180         |
| 3.239125932                                                       | 3.2577069                                    |          | 3.649072258 |                                      | 1.44845545     |                |             |
| 1.662373335                                                       | 2.727134985                                  |          |             |                                      |                |                |             |
| ENSG00000101849                                                   | 708.5630044                                  |          | 730.1210013 |                                      | 710.2823981    |                |             |
| 874.3574097                                                       | 954.2871684                                  |          | 956.6667012 |                                      | 716.3221346    |                |             |
| 928.4370931                                                       | -0.374171717                                 |          | 0.02216042  |                                      | 0.122155085    | TBL1X          |             |
|                                                                   | X                                            | 9463295  | 9741037     | +                                    | 9092           | protein_coding |             |
| transducin beta                                                   | like 1 X-linked                              |          |             | [Source:HGNC Symbol;Acc:HGNC:11585]  |                |                |             |
|                                                                   | -                                            | 781      | 825         | 611                                  | 844            | 836            | 1109        |
| 4.206494161                                                       | 4.299529789                                  |          | 4.181081468 |                                      | 5.158163016    |                |             |
| 5.651896634                                                       | 5.671567918                                  |          |             |                                      |                |                |             |
| ENSG00000167969                                                   | 405.5411818                                  |          | 592.0617574 |                                      | 769.5694722    |                |             |
| 464.1138857                                                       | 397.2391562                                  |          | 302.7863049 |                                      | 589.0574705    |                |             |
| 388.0464489                                                       | 0.601896823                                  |          | 0.022201904 |                                      | 0.122345632    | ECI1           |             |
|                                                                   | 16                                           | 2239395  | 2252300     | -                                    | 3234           | protein_coding | enoyl-      |
| CoA delta isomerase 1                                             |                                              |          |             | [Source:HGNC Symbol;Acc:HGNC:2703]   |                |                | -           |
|                                                                   | 447                                          | 669      | 662         | 448                                  | 348            | 351            | 6.768558567 |
|                                                                   | 9.801951358                                  |          | 12.73575865 |                                      | 7.697506106    |                | 6.614341115 |
|                                                                   | 5.046591118                                  |          |             |                                      |                |                |             |
| ENSG00000146574                                                   | 841.9288964                                  |          | 834.5504294 |                                      | 855.5938543    |                |             |
| 1034.932526                                                       | 1498.77877                                   |          | 931.6501689 |                                      | 844.0243934    |                |             |
| 1155.120489                                                       | -0.451796212                                 |          | 0.022254237 |                                      | 0.122591675    | CCZ1B          |             |
|                                                                   | 7                                            | 6794134  | 6826770     | -                                    | 7316           | protein_coding | "CCZ1       |
| homolog B, vacuolar protein trafficking and biogenesis associated |                                              |          |             | [Source:HGNC Symbol;Acc:HGNC:21717]" |                |                |             |
|                                                                   | 999                                          | 1313     | 1080        | 6.211592587                          | 6.107513516    | 928            | 943         |
|                                                                   |                                              |          |             |                                      |                |                | 736         |
| 6.259086653                                                       | 7.587589643                                  |          | 11.03159704 |                                      | 6.86406009     |                |             |
| ENSG00000138395                                                   | 33.56828574                                  |          | 18.58489822 |                                      | 15.11239145    | 0              |             |
|                                                                   | 7.990442797                                  | 0        | 22.42185847 |                                      | 2.663480932    |                |             |
| 3.122633432                                                       | 0.022261191                                  |          | 0.122591675 |                                      | CDK15          | 2              |             |
| 201790461                                                         | 201895550                                    |          | +           | 6141                                 | protein_coding | cyclin         |             |
| dependent kinase 15                                               |                                              |          |             | [Source:HGNC Symbol;Acc:HGNC:14434]  |                |                | 37          |
|                                                                   | 21                                           | 13       | 0           | 7                                    | 0              | 0.295047073    |             |
| 0.162034181                                                       | 0.131707681                                  |          | 0           | 0.070065835                          | 0              |                |             |
| ENSG00000277782                                                   | 38.10454057                                  |          | 38.05479158 |                                      | 37.1997328     |                |             |
| 11.39565344                                                       | 15.98088559                                  |          | 7.763751407 |                                      | 37.78635498    |                |             |
| 11.71343015                                                       | 1.699239958                                  |          | 0.022267344 |                                      | 0.122591675    |                |             |
| AC068870.2                                                        | 15                                           | 80999593 |             | 80999981                             |                | -              | 389         |
|                                                                   | lincRNA novel transcript                     |          |             |                                      |                | 42             | 43          |
|                                                                   | 11                                           | 14       | 9           | 5.287232064                          | 5.237756387    |                | 32          |
| 5.11808181                                                        | 1.571285589                                  |          | 2.212207165 |                                      | 1.07578114     |                |             |
| ENSG00000131263                                                   | 4024.565285                                  |          | 3641.755055 |                                      | 3467.712592    |                |             |
| 4872.159832                                                       | 4273.745405                                  |          | 4524.541792 |                                      | 3711.344311    |                |             |
| 4556.815676                                                       | -0.29595633                                  |          | 0.022319849 |                                      | 0.122839035    | RLIM           |             |
|                                                                   | X                                            | 74585217 | 74614617    |                                      | -              | 8379           |             |
| protein_coding                                                    | "ring finger protein, LIM domain interacting |          |             | [Source:HGNC Symbol;Acc:HGNC:13429]" |                |                |             |
|                                                                   |                                              |          |             |                                      |                | 4436           | 4115        |
|                                                                   | 4703                                         | 3744     | 5245        | 25.92555311                          | 23.27041294    |                | 2983        |



|                                                     |                                                   |                  |                                     |             |  |
|-----------------------------------------------------|---------------------------------------------------|------------------|-------------------------------------|-------------|--|
| 22.14970312                                         | 31.1885247                                        | 27.46572136      | 29.10612031                         |             |  |
| ENSG00000116209                                     | 3359.550327                                       | 3570.955443      | 3880.397127                         |             |  |
| 3068.538682                                         | 3074.037493                                       | 2510.279622      | 3603.634299                         |             |  |
| 2884.285266                                         | 0.321396739                                       | 0.022332302      | 0.122839035                         | TMEM59      |  |
| 1                                                   | 54026681                                          | 54053504         | - 9149                              |             |  |
| protein_coding                                      | transmembrane protein 59 [Source:HGNC             |                  |                                     |             |  |
| Symbol;Acc:HGNC:1239]                               | -                                                 | 3703 4035        | 3338 2962                           | 2693        |  |
| 2910                                                | 19.82023357                                       | 20.89759712      | 22.6996704                          |             |  |
| 17.98968133                                         | 18.09297929                                       | 14.78939402      |                                     |             |  |
| ENSG00000129675                                     | 1425.291268                                       | 1126.59883       | 1558.901303                         |             |  |
| 1214.155076                                         | 1017.069219                                       | 756.5344427      | 1370.2638                           |             |  |
| 995.9195792                                         | 0.460605451                                       | 0.02234074       | 0.122839035                         |             |  |
| ARHGEF6 X                                           | 136665547                                         | 136782088        | - 6434                              |             |  |
| protein_coding                                      | Rac/Cdc42 guanine nucleotide exchange factor 6    |                  |                                     |             |  |
| [Source:HGNC Symbol;Acc:HGNC:685]                   | -                                                 | 1571 1273        | 1341                                |             |  |
| 1172                                                | 891 877                                           | 11.95704358      | 9.375054216                         |             |  |
| 12.96744958                                         | 10.12181974                                       | 8.512242896      | 6.33796089                          |             |  |
| ENSG00000174744                                     | 1563.193414                                       | 2114.253421      | 1972.74833                          |             |  |
| 1880.282818                                         | 2545.526777                                       | 3287.517402      | 1883.398388                         |             |  |
| 2571.108999                                         | -0.449470144                                      | 0.022351719      | 0.122839035                         | BRMS1       |  |
| 11                                                  | 66337333                                          | 66345125         | - 2514                              |             |  |
| protein_coding                                      | "BRMS1, transcriptional repressor and anoikis     |                  |                                     |             |  |
| regulator [Source:HGNC Symbol;Acc:HGNC:17262]"      | -                                                 | 1723             | 2389                                |             |  |
| 1697                                                | 1815 2230                                         | 3811 33.56206604 | 45.02744633                         |             |  |
| 41.99749776                                         | 40.11653363                                       | 54.52390468      | 70.48629668                         |             |  |
| ENSG00000258754                                     | 12.70151352                                       | 1.769990306      | 8.137441549                         | 0           |  |
| 0                                                   | 0                                                 | 7.536315126      | 0                                   | 5.346149008 |  |
| 0.02235444                                          | 1                                                 | LINC01579        | 15                                  | 93718542    |  |
| 94070820                                            | -                                                 | 6795             | lincRNA long intergenic non-protein |             |  |
| coding RNA 1579 [Source:HGNC Symbol;Acc:HGNC:27519] | -                                                 | 14               |                                     |             |  |
| 2                                                   | 7 0                                               | 0 0              | 0.100894446                         |             |  |
| 0.013946556                                         | 0.064093712                                       | 0 0              | 0                                   |             |  |
| ENSG00000153914                                     | 1584.967438                                       | 1425.727192      | 1188.066466                         |             |  |
| 1088.802888                                         | 1128.935418                                       | 1017.051434      | 1399.587032                         |             |  |
| 1078.263247                                         | 0.377308436                                       | 0.02235726       | 0.122839035                         | SREK1       |  |
| 5                                                   | 66139971                                          | 66183615         | + 18240                             |             |  |
| protein_coding                                      | splicing regulatory glutamic acid and lysine rich |                  |                                     |             |  |
| protein 1 [Source:HGNC Symbol;Acc:HGNC:17882]       | -                                                 | 1747             | 1611                                |             |  |
| 1022                                                | 1051 989                                          | 1179 4.690258234 | 4.185016236                         |             |  |
| 3.486044354                                         | 3.201768486                                       | 3.332873405      | 3.005522539                         |             |  |
| ENSG00000166986                                     | 4271.337548                                       | 4286.031527      | 4373.293587                         |             |  |
| 4774.778793                                         | 5596.734434                                       | 5373.378613      | 4310.220887                         |             |  |
| 5248.29728                                          | -0.284102778                                      | 0.02236006       | 0.122839035                         | MARS        |  |
| 12                                                  | 57475445                                          | 57517569         | + 7028                              |             |  |
| protein_coding                                      | methionyl-tRNA synthetase [Source:HGNC            |                  |                                     |             |  |
| Symbol;Acc:HGNC:6898]                               | -                                                 | 4708 4843        | 3762 4609                           | 4903        |  |
| 6229                                                | 32.80449714                                       | 32.65195258      | 33.3038073                          |             |  |
| 36.44072417                                         | 42.8822437                                        | 41.21142163      |                                     |             |  |
| ENSG00000141562                                     | 1284.667368                                       | 1604.496213      | 1682.125417                         |             |  |
| 1737.319166                                         | 2060.39275                                        | 2103.113992      | 1523.762999                         |             |  |

|                                                                     |                                                       |             |                |        |
|---------------------------------------------------------------------|-------------------------------------------------------|-------------|----------------|--------|
| 1966.941969                                                         | -0.368830776                                          | 0.022360885 | 0.122839035    | NARF   |
| 17                                                                  | 82458180                                              | 82490537    | + 7962         |        |
| protein_coding                                                      | nuclear prelamina A recognition factor [Source:HGNC   |             |                |        |
| Symbol;Acc:HGNC:29916]                                              | -                                                     | 1416 1813   | 1447 1677      | 1805   |
| 2438                                                                | 8.709029541                                           | 10.78951869 | 11.30715133    |        |
| 11.70369332                                                         | 13.93485305                                           | 14.23778879 |                |        |
| ENSG00000113522                                                     | 177.8211893                                           | 153.9891566 | 168.5612892    |        |
| 122.2442824                                                         | 69.63100152                                           | 93.16501689 | 166.7905451    |        |
| 95.0134336                                                          | 0.810371452                                           | 0.022411414 | 0.12307839     | RAD50  |
| 5                                                                   | 132556019                                             | 132646344   | + 9771         |        |
| protein_coding                                                      | RAD50 double strand break repair protein [Source:HGNC |             |                |        |
| Symbol;Acc:HGNC:9816]                                               | -                                                     | 196 174     | 145 118        | 61     |
| 108                                                                 | 0.982303613                                           | 0.843794472 | 0.923285118    |        |
| 0.671050243                                                         | 0.383740981                                           | 0.513943953 |                |        |
| ENSG00000073578                                                     | 1261.986094                                           | 1274.39302  | 1771.637274    |        |
| 1140.601313                                                         | 974.8340213                                           | 1123.156037 | 1436.005463    |        |
| 1079.530457                                                         | 0.410432762                                           | 0.02242594  | 0.123116677    | SDHA   |
| 5                                                                   | 218241 256700                                         | + 8383      | protein_coding |        |
| succinate dehydrogenase complex flavoprotein subunit A [Source:HGNC |                                                       |             |                |        |
| Symbol;Acc:HGNC:10680]                                              | -                                                     | 1391 1440   | 1524 1101      | 854    |
| 1302                                                                | 8.125616987                                           | 8.13934518  | 11.31077459    |        |
| 7.297933412                                                         | 6.261894765                                           | 7.221751432 |                |        |
| ENSG00000105976                                                     | 1936.980812                                           | 1502.72177  | 1747.22495     |        |
| 1695.880426                                                         | 1117.5205                                             | 849.6994596 | 1728.975844    |        |
| 1221.033462                                                         | 0.502264459                                           | 0.02243562  | 0.123116677    | MET    |
| 7                                                                   | 116672390                                             | 116798386   | + 7039         |        |
| protein_coding                                                      | "MET proto-oncogene, receptor tyrosine kinase         |             |                |        |
| [Source:HGNC Symbol;Acc:HGNC:7029]"                                 | -                                                     | 2135 1698   | 1503           |        |
| 1637                                                                | 979 985                                               | 14.85304845 | 11.43018242    |        |
| 13.28479515                                                         | 12.92259572                                           | 8.549074206 | 6.50663258     |        |
| ENSG00000111581                                                     | 2407.844064                                           | 1870.879754 | 1778.612224    |        |
| 1816.052772                                                         | 1530.740542                                           | 1104.177978 | 2019.112014    |        |
| 1483.657097                                                         | 0.445376351                                           | 0.022439265 | 0.123116677    | NUP107 |
| 12                                                                  | 68686734                                              | 68745809    | + 8320         |        |
| protein_coding                                                      | nucleoporin 107 [Source:HGNC Symbol;Acc:HGNC:29914]   |             |                |        |
| -                                                                   | 2654 2114                                             | 1530 1753   | 1341 1280      |        |
| 15.62090804                                                         | 12.0394902                                            | 11.44128888 | 11.70767434    |        |
| 9.90724292                                                          | 7.153484846                                           |             |                |        |
| ENSG00000187796                                                     | 27.21752898                                           | 38.93978674 | 22.08734135    |        |
| 64.23004668                                                         | 67.34801786                                           | 75.04959694 | 29.41488569    |        |
| 68.87588716                                                         | -1.222826755                                          | 0.022501784 | 0.123421416    | CARD9  |
| 9                                                                   | 136361903                                             | 136373681   | - 6699         |        |
| protein_coding                                                      | caspase recruitment domain family member 9            |             |                |        |
| [Source:HGNC Symbol;Acc:HGNC:16391]                                 | -                                                     | 30 44       | 19             |        |
| 62                                                                  | 59 87                                                 | 0.219300671 | 0.311221176    |        |
| 0.176461704                                                         | 0.514273037                                           | 0.541364027 | 0.603865604    |        |
| ENSG00000099282                                                     | 24.49577608                                           | 27.43484975 | 22.08734135    | 0      |
| 6.848950969                                                         | 6.038473317                                           | 24.67265573 | 4.295808095    |        |
| 2.5212609                                                           | 0.022522843                                           | 0.123476728 | TSPAN15 10     |        |
| 69451473                                                            | 69507669                                              | + 2646      | protein_coding |        |

|                                         |                                                    |                |             |                                  |             |                |             |
|-----------------------------------------|----------------------------------------------------|----------------|-------------|----------------------------------|-------------|----------------|-------------|
|                                         | tetraspanin 15 [Source:HGNC Symbol;Acc:HGNC:23298] |                |             |                                  |             |                | -           |
|                                         | 27                                                 | 31             | 19          | 0                                | 6           | 7              | 0.499692243 |
|                                         | 0.555134598                                        |                | 0.44675622  |                                  | 0           | 0.139382667    |             |
| 0.12300966                              |                                                    |                |             |                                  |             |                |             |
| ENSG00000154263                         | 33.56828574                                        |                | 0           | 0                                | 0           | 0              | 0           |
|                                         | 11.18942858                                        | 0              |             | 5.919689445                      |             | 0.02252583     |             |
| 0.123476728                             | ABCA10                                             | 17             |             | 69147214                         |             | 69244846       | -           |
|                                         | 8405                                               | protein_coding |             | ATP binding cassette subfamily A |             |                |             |
| member 10                               | [Source:HGNC Symbol;Acc:HGNC:30]                   |                |             | -                                |             | 37             | 0           |
|                                         | 0                                                  | 0              | 0           | 0                                | 0.215572168 | 0              | 0           |
|                                         | 0                                                  | 0              | 0           |                                  |             |                |             |
| ENSG00000164741                         | 2112.080249                                        |                |             | 1741.670461                      |             | 1985.535738    |             |
|                                         | 1628.542474                                        | 1317.28157     |             | 1614.860293                      |             | 1946.428816    |             |
| 1520.228112                             | 0.355990708                                        |                |             | 0.022575092                      |             | 0.123708429    | DLC1        |
|                                         | 8                                                  | 13083361       |             | 13604610                         |             | -              | 12794       |
| protein_coding                          | DLC1 Rho GTPase activating protein [Source:HGNC    |                |             |                                  |             |                |             |
| Symbol;Acc:HGNC:2897]                   | -                                                  |                | 2328        | 1968                             | 1708        | 1572           | 1154        |
|                                         | 1872                                               | 8.910566447    |             | 7.288617988                      |             | 8.305931911    |             |
| 6.827445451                             | 5.544301288                                        |                |             | 6.803470659                      |             |                |             |
| ENSG00000081026                         | 751.2037998                                        |                |             | 508.872213                       |             | 649.8328323    |             |
|                                         | 435.1067679                                        | 527.3692246    |             | 379.5611799                      |             | 636.6362817    |             |
| 447.3457241                             | 0.510206847                                        |                |             | 0.022583691                      |             | 0.123717221    | MAGI3       |
|                                         | 1                                                  | 113390749      |             | 113685923                        |             | + 8180         |             |
| protein_coding                          | "membrane associated guanylate kinase, WW and PDZ  |                |             |                                  |             |                |             |
| domain containing 3                     | [Source:HGNC Symbol;Acc:HGNC:29647]"               |                |             |                                  |             |                | -           |
|                                         | 828                                                | 575            | 559         | 420                              | 462         | 440            | 4.956849313 |
|                                         | 3.330741911                                        |                | 4.251726802 |                                  | 2.853041116 |                | 3.471650779 |
|                                         | 2.501096169                                        |                |             |                                  |             |                |             |
| ENSG00000165632                         | 540.7215757                                        |                |             | 454.0025136                      |             | 435.9343687    |             |
|                                         | 684.7751751                                        | 633.5279646    |             | 623.6880297                      |             | 476.8861527    |             |
| 647.3303898                             | -0.439972745                                       |                |             | 0.022601442                      |             | 0.123738153    | TAF3        |
|                                         | 10                                                 | 7818504        | 8016627     | +                                | 4872        | protein_coding | TATA-       |
| box binding protein associated factor 3 | [Source:HGNC                                       |                |             |                                  |             |                |             |
| Symbol;Acc:HGNC:17303]                  | -                                                  |                | 596         | 513                              | 375         | 661            | 555         |
|                                         | 723                                                | 5.990563329    |             | 4.989264479                      |             | 4.788845598    |             |
| 7.538869463                             | 7.002176663                                        |                |             | 6.900205672                      |             |                |             |
| ENSG00000131378                         | 762.0908114                                        |                |             | 1012.434455                      |             | 986.9554108    |             |
|                                         | 1111.594195                                        | 1135.784369    |             | 1445.78304                       |             | 920.4935591    |             |
| 1231.053868                             | -0.42037279                                        |                |             | 0.022607002                      |             | 0.123738153    | RFTN1       |
|                                         | 3                                                  | 16313574       |             | 16514026                         |             | -              | 4776        |
| protein_coding                          | "raftlin, lipid raft linker 1 [Source:HGNC         |                |             |                                  |             |                |             |
| Symbol;Acc:HGNC:30278]"                 | -                                                  |                | 840         | 1144                             | 849         | 1073           | 995         |
|                                         | 1676                                               | 8.6127859      |             | 11.34979839                      |             | 11.059875      |             |
| 12.48381855                             | 12.80578255                                        |                |             | 16.31701506                      |             |                |             |
| ENSG00000092108                         | 792.9373443                                        |                |             | 841.6303906                      |             | 896.2810621    |             |
|                                         | 707.566482                                         | 589.0097833    |             | 617.6495564                      |             | 843.6162656    |             |
| 638.0752739                             | 0.40237139                                         |                |             | 0.022608497                      |             | 0.123738153    | SCFD1       |
|                                         | 14                                                 | 30622112       |             | 30735812                         |             | + 6571         |             |
| protein_coding                          | sec1 family domain containing 1 [Source:HGNC       |                |             |                                  |             |                |             |
| Symbol;Acc:HGNC:20726]                  | -                                                  |                | 874         | 951                              | 771         | 683            | 516         |

|                                    |                                                 |               |             |               |
|------------------------------------|-------------------------------------------------|---------------|-------------|---------------|
| 716                                | 6.513413485                                     | 6.857652759   | 7.300115938 |               |
| 5.775655488                        | 4.826869915                                     | 5.066552804   |             |               |
| ENSG00000231607                    | 214.111228                                      | 148.6791857   | 119.7366399 |               |
| 69.40988916                        | 115.2906746                                     | 77.63751407   | 160.8423512 |               |
| 87.44602596                        | 0.883589671                                     | 0.022620017   | 0.123762908 | DLEU2         |
| 13                                 | 49982552                                        | 50125720      | - 5103      |               |
| antisense                          | deleted in lymphocytic leukemia 2 [Source:HGNC  |               |             |               |
| Symbol;Acc:HGNC:13748]             | -                                               | 236 168       | 103 67      | 101           |
| 90                                 | 2.264723143                                     | 1.559948117   | 1.255794287 |               |
| 0.729560442                        | 1.216586984                                     | 0.8200644     |             |               |
| ENSG00000068078                    | 12.70151352                                     | 0 13.9498998  | 0 0         |               |
| 0                                  | 8.883804441                                     | 0 5.581563334 | 0.022641271 |               |
| 0.123840889                        | FGFR3                                           | 4 1793293     | 1808872 +   | 4848          |
| protein_coding                     | fibroblast growth factor receptor 3             |               |             |               |
| [Source:HGNC Symbol;Acc:HGNC:3690] | -                                               | 14            | 0           | 12            |
| 0                                  | 0                                               | 0             | 0.141414554 | 0 0.154001688 |
| 0                                  | 0                                               | 0             |             |               |
| ENSG00000213366                    | 153.3254133                                     | 148.6791857   | 113.9241817 |               |
| 50.76245625                        | 89.0363626                                      | 83.67598739   | 138.6429269 |               |
| 74.49160208                        | 0.897636519                                     | 0.02266609    | 0.123938319 | GSTM2         |
| 1                                  | 109668022                                       | 109709551     | + 9116      |               |
| protein_coding                     | glutathione S-transferase mu 2 [Source:HGNC     |               |             |               |
| Symbol;Acc:HGNC:4634]              | -                                               | 169 168       | 98 49       | 78            |
| 97                                 | 0.907843674                                     | 0.873235546   | 0.668849807 |               |
| 0.298678394                        | 0.525941749                                     | 0.494764392   |             |               |
| ENSG00000163257                    | 1495.149592                                     | 1488.561848   | 1159.004175 |               |
| 1931.045274                        | 1662.012102                                     | 1745.981428   | 1380.905205 |               |
| 1779.679601                        | -0.365259374                                    | 0.022683136   | 0.123993197 | DCAF16        |
| 4                                  | 17800655                                        | 17810758      | - 4816      |               |
| protein_coding                     | DDB1 and CUL4 associated factor 16 [Source:HGNC |               |             |               |
| Symbol;Acc:HGNC:25987]             | -                                               | 1648 1682     | 997 1864    | 1456          |
| 2024                               | 16.75712127                                     | 16.54877892   | 12.87999002 |               |
| 21.50658592                        | 18.58327514                                     | 19.54137181   |             |               |
| ENSG00000169976                    | 1366.319955                                     | 1910.704536   | 2018.085504 |               |
| 1938.297054                        | 2515.847989                                     | 2590.505053   | 1765.036665 |               |
| 2348.216699                        | -0.41235733                                     | 0.022695081   | 0.124020169 | SF3B5         |
| 6                                  | 144094881                                       | 144095573     | - 693       |               |
| protein_coding                     | splicing factor 3b subunit 5 [Source:HGNC       |               |             |               |
| Symbol;Acc:HGNC:21083]             | -                                               | 1506 2159     | 1736 1871   | 2204          |
| 3003                               | 106.4193056                                     | 147.6202201   | 155.8559307 |               |
| 150.0211867                        | 195.4905263                                     | 201.4898232   |             |               |
| ENSG00000166123                    | 676.8092206                                     | 860.2152888   | 797.4692718 |               |
| 528.3439324                        | 574.1703896                                     | 631.4517811   | 778.1645938 |               |
| 577.988701                         | 0.428392739                                     | 0.022729275   | 0.124166542 | GPT2          |
| 16                                 | 46884378                                        | 46931297      | + 6354      |               |
| protein_coding                     | glutamic--pyruvic transaminase 2 [Source:HGNC   |               |             |               |
| Symbol;Acc:HGNC:18062]             | -                                               | 746 972       | 686 510     | 503           |
| 732                                | 5.749370556                                     | 7.248455805   | 6.717129974 |               |
| 4.460001546                        | 4.865955521                                     | 5.356669956   |             |               |
| ENSG00000125726                    | 166.0269268                                     | 220.3637931   | 174.3737475 |               |

|                                              |                                                   |                |                  |                         |
|----------------------------------------------|---------------------------------------------------|----------------|------------------|-------------------------|
| 112.9205659                                  | 116.4321665                                       | 15.52750281    | 186.9214891      |                         |
| 81.62674508                                  | 1.200997061                                       | 0.022735905    | 0.124166542      | CD70                    |
| 19                                           | 6583183                                           | 6604103 -      | 1532             | protein_coding CD70     |
| molecule [Source:HGNC Symbol;Acc:HGNC:11937] |                                                   |                | -                | 183 249                 |
| 150                                          | 109                                               | 102            | 18               | 5.849530476 7.701352865 |
| 6.091711685                                  | 3.953482095                                       | 4.09250074     | 0.546317054      |                         |
| ENSG0000047648                               | 69.85832438                                       | 61.06466557    | 53.4746159       |                         |
| 17.61146441                                  | 30.82027936                                       | 26.7418104     | 61.46586861      |                         |
| 25.05785139                                  | 1.296598254                                       | 0.022804266    | 0.124453223      |                         |
| ARHGAP6 X                                    | 11137543                                          | 11665701       | -                | 7885                    |
| protein_coding                               | Rho GTPase activating protein 6 [Source:HGNC      |                |                  |                         |
| Symbol;Acc:HGNC:676]                         | -                                                 | 77             | 69               | 46 17 27                |
| 31                                           | 0.478208962                                       | 0.414642519    | 0.362963522      |                         |
| 0.119800676                                  | 0.210479317                                       | 0.182806239    |                  |                         |
| ENSG00000100284                              | 518.0403016                                       | 608.8766653    | 547.5335671      |                         |
| 597.7538216                                  | 771.6484758                                       | 978.2326773    | 558.150178       |                         |
| 782.5449916                                  | -0.48818329                                       | 0.022807701    | 0.124453223      | TOM1                    |
| 22                                           | 35299275                                          | 35347994       | +                | 5871                    |
| protein_coding                               | target of myb1 membrane trafficking protein       |                |                  |                         |
| [Source:HGNC Symbol;Acc:HGNC:11982]          | -                                                 |                | 571              | 688 471                 |
| 577                                          | 676                                               | 1134           | 4.762694353      | 5.552681954             |
| 4.991322981                                  | 5.461045267                                       | 7.077534186    | 8.981150877      |                         |
| ENSG00000182287                              | 1425.291268                                       | 1146.068723    | 1314.778056      |                         |
| 1030.788652                                  | 1120.944975                                       | 651.2924792    | 1295.379349      |                         |
| 934.3420356                                  | 0.472492128                                       | 0.022809506    | 0.124453223      | AP1S2                   |
| X                                            | 15825806                                          | 15854931       | -                | 5371                    |
| protein_coding                               | adaptor related protein complex 1 subunit sigma 2 |                |                  |                         |
| [Source:HGNC Symbol;Acc:HGNC:560]            | -                                                 |                | 1571             | 1295 1131               |
| 995                                          | 982                                               | 755            | 14.3235186       | 11.42460141             |
| 13.10129722                                  | 10.29390064                                       | 11.23837956    | 6.536162145      |                         |
| ENSG00000113273                              | 600.6001395                                       | 537.1920579    | 740.507181       |                         |
| 503.4806885                                  | 474.8606005                                       | 326.0775591    | 626.0997928      |                         |
| 434.8062827                                  | 0.526536627                                       | 0.02282031     | 0.124473781      | ARSB                    |
| 5                                            | 78777209                                          | 78986087       | -                | 9053                    |
| protein_coding                               | arylsulfatase B [Source:HGNC Symbol;Acc:HGNC:714] |                |                  |                         |
| -                                            | 662                                               | 607            | 637              | 486 416 378             |
| 3.580916157                                  | 3.177039479                                       | 4.377778243    | 2.983017441      |                         |
| 2.824542868                                  | 1.941468272                                       |                |                  |                         |
| ENSG00000155926                              | 8.165258694                                       | 5.309970919    | 8.137441549      | 0                       |
| 0                                            | 0                                                 | 7.204223721    | 0                | 5.281047493             |
| 0.022825541                                  | 1                                                 | SLA            | 8                | 133036724 133103054     |
| -                                            | 7637                                              | protein_coding | Src like adaptor | [Source:HGNC            |
| Symbol;Acc:HGNC:10902]                       | -                                                 | 9              | 6                | 7 0 0                   |
| 0                                            | 0.057709645                                       | 0.037226731    | 0.057027206      | 0                       |
| 0                                            | 0                                                 |                |                  |                         |
| ENSG00000265491                              | 1448.879793                                       | 1324.837744    | 1222.941216      |                         |
| 1768.398221                                  | 1650.597184                                       | 1624.349322    | 1332.219584      |                         |
| 1681.114909                                  | -0.335037653                                      | 0.022935271    | 0.125062142      | RNF115                  |
| 1                                            | 145738868                                         | 145824077      | -                | 11041                   |
| protein_coding                               | ring finger protein 115 [Source:HGNC              |                |                  |                         |

|                                     |                                       |                |                           |                      |             |             |
|-------------------------------------|---------------------------------------|----------------|---------------------------|----------------------|-------------|-------------|
| Symbol;Acc:HGNC:18154]              | -                                     | 1597           | 1497                      | 1052                 | 1707        | 1446        |
| 1883                                | 7.083129627                           | 6.424507364    | 5.928081647               |                      |             |             |
| 8.590870152                         | 8.050210623                           | 7.92999527     |                           |                      |             |             |
| ENSG00000184857                     | 234.9780002                           | 217.7088077    | 167.3987976               |                      |             |             |
| 347.0494458                         | 232.8643329                           | 395.9513218    | 206.6952018               |                      |             |             |
| 325.2883668                         | -0.654016992                          | 0.022942317    | 0.125062142               |                      |             |             |
| TMEM186 16                          | 8780384 8797648                       | -              | 1978                      | protein_coding       |             |             |
| transmembrane protein 186           | [Source:HGNC Symbol;Acc:HGNC:24530]   | -              |                           |                      |             |             |
| 259                                 | 246                                   | 144            | 335                       | 204                  | 459         | 6.412127663 |
| 5.892983983                         | 4.529424777                           | 9.410887102    | 6.33944503                |                      |             |             |
| 10.78989992                         |                                       |                |                           |                      |             |             |
| ENSG00000129055                     | 1316.421152                           | 1166.423612    | 1175.279058               |                      |             |             |
| 1813.980835                         | 1457.685065                           | 1439.744567    | 1219.374607               |                      |             |             |
| 1570.470155                         | -0.364765998                          | 0.022970097    | 0.125174996               |                      |             |             |
| ANAPC13 3                           | 134477706                             | 134486716      | -                         | 2359                 |             |             |
| protein_coding                      | anaphase promoting complex subunit 13 | [Source:HGNC   |                           |                      |             |             |
| Symbol;Acc:HGNC:24540]              | -                                     | 1451           | 1318                      | 1011                 | 1751        | 1277        |
| 1669                                | 30.12091462                           | 26.47365532    | 26.66429229               |                      |             |             |
| 41.24489942                         | 33.2744064                            | 32.89723627    |                           |                      |             |             |
| ENSG00000127362                     | 0                                     | 0              | 0                         | 19.6834014           | 6.848950969 |             |
| 0                                   | 0                                     | 8.844117457    | -5.618154084              | 0.022981062          |             |             |
| 0.125196184                         | TAS2R3                                | 7              | 141764097                 | 141765197            |             |             |
| +                                   | 1101                                  | protein_coding | taste 2 receptor member 3 |                      |             |             |
| [Source:HGNC Symbol;Acc:HGNC:14910] | -                                     | 0              | 0                         | 0                    | 0           |             |
| 19                                  | 6                                     | 0              | 0                         | 0                    | 0.958911055 |             |
| 0.334974148                         | 0                                     |                |                           |                      |             |             |
| ENSG00000277157                     | 1.814501932                           | 17.69990306    | 3.48747495                | 0                    |             |             |
| 0                                   | 0                                     | 7.667293315    | 0                         | 5.375193265          |             |             |
| 0.022987218                         | 1                                     | HIST1H4D       | 6                         | 26188765             |             |             |
| 26189076                            | -                                     | 312            | protein_coding            | histone cluster 1 H4 |             |             |
| family member d                     | [Source:HGNC Symbol;Acc:HGNC:4782]    | -              | 2                         |                      |             |             |
| 20                                  | 3                                     | 0              | 0                         | 0                    | 0.31390923  |             |
| 3.037398978                         | 0.598237327                           | 0              | 0                         | 0                    |             |             |
| ENSG00000059758                     | 1007.955823                           | 929.2449108    | 1020.667669               |                      |             |             |
| 1051.508022                         | 1462.251032                           | 1375.909277    | 985.9561342               |                      |             |             |
| 1296.55611                          | -0.395270314                          | 0.023000628    | 0.125264196               | CDK17                |             |             |
| 12                                  | 96278261                              | 96400560       | -                         | 6547                 |             |             |
| protein_coding                      | cyclin dependent kinase 17            | [Source:HGNC   |                           |                      |             |             |
| Symbol;Acc:HGNC:8750]               | -                                     | 1111           | 1050                      | 878                  | 1015        | 1281        |
| 1595                                | 8.309988094                           | 7.599296664    | 8.343706553               |                      |             |             |
| 8.614612461                         | 12.02691244                           | 11.32789891    |                           |                      |             |             |
| ENSG00000204335                     | 7.258007728                           | 0.884995153    | 15.11239145               | 0                    |             |             |
| 0                                   | 0                                     | 7.75179811     | 0                         | 5.382363472          |             |             |
| 0.023006099                         | 1                                     | SP5            | 2                         | 170715351            | 170718078   |             |
| +                                   | 2060                                  | protein_coding | Sp5 transcription factor  |                      |             |             |
| [Source:HGNC Symbol;Acc:HGNC:14529] | -                                     | zf-C2H2        | 8                         | 1                    | 13          |             |
| 0                                   | 0                                     | 0              | 0.190174135               | 0.023001662          |             |             |
| 0.392629547                         | 0                                     | 0              | 0                         |                      |             |             |
| ENSG00000151135                     | 943.5410046                           | 898.2700804    | 1159.004175               |                      |             |             |
| 852.6020713                         | 696.3100152                           | 698.7376267    | 1000.271753               |                      |             |             |

|                        |                                                  |             |             |         |
|------------------------|--------------------------------------------------|-------------|-------------|---------|
| 749.2165711            | 0.416197192                                      | 0.023038842 | 0.125433695 |         |
| TMEM263 12             | 106955719                                        | 106978778   | + 4768      |         |
| protein_coding         | transmembrane protein 263 [Source:HGNC           |             |             |         |
| Symbol;Acc:HGNC:28281] | -                                                | 1040 1015   | 997 823     | 610     |
| 810                    | 10.6813409                                       | 10.08686565 | 13.00965435 |         |
| 9.591259296            | 7.863953711                                      | 7.899139621 |             |         |
| ENSG00000109814        | 979.8310433                                      | 891.1901192 | 880.006179  |         |
| 805.983489             | 666.6312277                                      | 584.8692727 | 917.0091138 |         |
| 685.8279965            | 0.41994006                                       | 0.023047413 | 0.125441752 | UGDH    |
| 4                      | 39498755                                         | 39528311    | - 4045      |         |
| protein_coding         | UDP-glucose 6-dehydrogenase [Source:HGNC         |             |             |         |
| Symbol;Acc:HGNC:12525] | -                                                | 1080 1007   | 757 778     | 584     |
| 678                    | 13.07476564                                      | 11.7960712  | 11.6435175  |         |
| 10.68742585            | 8.874454792                                      | 7.793673107 |             |         |
| ENSG00000157036        | 510.7822938                                      | 564.6269077 | 444.0718103 |         |
| 628.8328764            | 707.7249335                                      | 722.0288809 | 506.4936706 |         |
| 686.1955636            | -0.437038097                                     | 0.023072605 | 0.125540235 | EXOG    |
| 3                      | 38496127                                         | 38542161    | + 5223      |         |
| protein_coding         | exo/endonuclease G [Source:HGNC                  |             |             |         |
| Symbol;Acc:HGNC:3347]  | -                                                | 563 638     | 382 607     | 620 837 |
| 5.278579327            | 5.787980959                                      | 4.550406381 | 6.45774228  |         |
| 7.296574546            | 7.451375513                                      |             |             |         |
| ENSG00000100814        | 699.4904948                                      | 693.8362    | 802.1192384 |         |
| 1164.428588            | 848.1284283                                      | 924.7490565 | 731.8153111 |         |
| 979.1020244            | -0.420742484                                     | 0.023080155 | 0.125542699 |         |
| CCNB1IP1               | 14 20311368                                      | 20333312    | -           | 3680    |
| protein_coding         | cyclin B1 interacting protein 1 [Source:HGNC     |             |             |         |
| Symbol;Acc:HGNC:19437] | -                                                | 771 784     | 690 1124    | 743     |
| 1072                   | 10.25971373                                      | 10.09472947 | 11.66562788 |         |
| 16.97190281            | 12.41047361                                      | 13.54496805 |             |         |
| ENSG00000135318        | 7571.009311                                      | 7487.943991 | 7983.992651 |         |
| 8895.861466            | 9559.994061                                      | 9124.995821 | 7680.981984 |         |
| 9193.617116            | -0.259381972                                     | 0.02308899  | 0.125552152 | NT5E    |
| 6                      | 85449584                                         | 85495791    | + 4533      |         |
| protein_coding         | 5'-nucleotidase ecto [Source:HGNC                |             |             |         |
| Symbol;Acc:HGNC:8021]  | -                                                | 8345 8461   | 6868 8587   | 8375    |
| 10578                  | 90.15074198                                      | 88.44278644 | 94.2652045  |         |
| 105.2610717            | 113.5655103                                      | 108.5047778 |             |         |
| ENSG00000268205        | 456.3472359                                      | 558.4319416 | 381.2972612 |         |
| 566.6747667            | 633.5279646                                      | 773.7872236 | 465.3588129 |         |
| 657.9966517            | -0.498987986                                     | 0.023103541 | 0.125581243 |         |
| AC005261.1             | 19 57304305                                      | 57308562    | + 4258      |         |
| lincRNA                | novel transcript                                 | -           | 503 631     | 328     |
| 547                    | 555 897                                          | 5.784835471 | 7.021827285 |         |
| 4.792642484            | 7.138282197                                      | 8.011884618 | 9.795301408 |         |
| ENSG00000135900        | 576.1043634                                      | 534.5370725 | 587.0582832 |         |
| 595.6818846            | 838.9964937                                      | 910.9468318 | 565.8999064 |         |
| 781.87507              | -0.467117615                                     | 0.023108539 | 0.125581243 | MRPL44  |
| 2                      | 223957404                                        | 223967714   | + 1748      |         |
| protein_coding         | mitochondrial ribosomal protein L44 [Source:HGNC |             |             |         |

|                        |                                                                                                  |             |      |             |             |             |
|------------------------|--------------------------------------------------------------------------------------------------|-------------|------|-------------|-------------|-------------|
| Symbol;Acc:HGNC:16650] | -                                                                                                | 635         | 604  | 505         | 575         | 735         |
| 1056                   | 17.7893869                                                                                       | 16.37276209 |      | 17.97449909 |             |             |
| 18.27841191            | 25.84599589                                                                                      | 28.09011441 |      |             |             |             |
| ENSG00000163161        | 1486.077082                                                                                      | 1600.071237 |      | 1457.764529 |             |             |
| 2076.080864            | 1772.736809                                                                                      | 1852.08603  |      | 1514.637616 |             |             |
| 1900.301234            | -0.327071583                                                                                     | 0.023123209 |      | 0.125622371 |             | ERCC3       |
| 2                      | 127257290                                                                                        | 127294176   |      | -           | 8422        |             |
| protein_coding         | "ERCC excision repair 3, TFIIH core complex helicase subunit [Source:HGNC Symbol;Acc:HGNC:3435]" |             |      |             |             |             |
| 1254                   | 2004                                                                                             | 1553        | 2147 | 9.524174501 | 10.17207679 | 1808        |
| 9.263799482            | 13.22191996                                                                                      | 11.33453163 |      | 11.85353334 |             |             |
| ENSG00000070814        | 4040.895802                                                                                      | 4040.002874 |      | 3750.198063 |             |             |
| 2882.064353            | 3147.09297                                                                                       | 3549.759671 |      | 3943.698913 |             |             |
| 3192.972331            | 0.304529631                                                                                      | 0.023141452 |      | 0.125682884 |             | TCOF1       |
| 5                      | 150357629                                                                                        | 150400308   |      | +           | 11439       |             |
| protein_coding         | treacle ribosome biogenesis factor 1 [Source:HGNC Symbol;Acc:HGNC:11654]                         |             |      |             |             |             |
| 4115                   | 19.06737185                                                                                      | 18.90946156 |      | 17.546203   |             | 2757        |
| 13.51391271            | 14.81480933                                                                                      | 16.72679744 |      |             |             |             |
| ENSG00000121988        | 195.9662087                                                                                      | 165.4940936 |      | 230.1733467 |             |             |
| 146.0715578            | 116.4321665                                                                                      | 84.53862644 |      | 197.2112163 |             |             |
| 115.6807836            | 0.770559996                                                                                      | 0.023198359 |      | 0.125935622 |             | ZRANB3      |
| 2                      | 135136916                                                                                        | 135531236   |      | -           | 9115        |             |
| protein_coding         | zinc finger RANBP2-type containing 3 [Source:HGNC Symbol;Acc:HGNC:25249]                         |             |      |             |             |             |
| 98                     | 1.160448207                                                                                      | 0.972100965 |      | 1.351497865 |             | 102         |
| 0.859556608            | 0.687845434                                                                                      | 0.499919895 |      |             |             |             |
| ENSG00000184205        | 242.2360079                                                                                      | 345.1481097 |      | 338.2850701 |             |             |
| 372.9486582            | 436.0498784                                                                                      | 565.8912137 |      | 308.5563959 |             |             |
| 458.2965834            | -0.572543396                                                                                     | 0.023202227 |      | 0.125935622 |             | TSPYL2      |
| X                      | 53082367                                                                                         | 53088540    |      | +           | 4948        |             |
| protein_coding         | TSPY like 2 [Source:HGNC Symbol;Acc:HGNC:24358]                                                  |             |      |             |             |             |
| 267                    | 390                                                                                              | 291         | 360  | 382         | 656         | 2.642471147 |
| 3.73474846             | 3.65906517                                                                                       | 4.04282417  |      | 4.745489668 |             |             |
| 6.164603756            |                                                                                                  |             |      |             |             |             |
| ENSG00000163428        | 4262.265038                                                                                      | 3296.606945 |      | 2872.516867 |             |             |
| 5167.410853            | 4217.812305                                                                                      | 4150.156447 |      | 3477.129617 |             |             |
| 4511.793201            | -0.37546397                                                                                      | 0.023225517 |      | 0.126009176 |             | LRR58       |
| 3                      | 120324509                                                                                        | 120349339   |      | -           | 7903        |             |
| protein_coding         | leucine rich repeat containing 58 [Source:HGNC Symbol;Acc:HGNC:26968]                            |             |      |             |             |             |
| 4811                   | 29.11050329                                                                                      | 22.33370297 |      | 19.45304583 |             | 3695        |
| 35.07086733            | 28.73887881                                                                                      | 28.30573217 |      |             |             |             |
| ENSG00000196935        | 548.8868344                                                                                      | 513.2971888 |      | 435.9343687 |             |             |
| 878.5012837            | 494.2659616                                                                                      | 793.6279217 |      | 499.3727973 |             |             |
| 722.1317223            | -0.532203758                                                                                     | 0.023230026 |      | 0.126009176 |             | SRGAP1      |
| 12                     | 63844293                                                                                         | 64162221    |      | +           | 26641       |             |
| protein_coding         | SLIT-ROBO Rho GTPase activating protein 1 [Source:HGNC Symbol;Acc:HGNC:17382]                    |             |      |             |             |             |
| 920                    | 1.112073612                                                                                      | 1.031582371 |      | 0.875765015 |             | 433         |



|                        |                                              |              |             |        |  |
|------------------------|----------------------------------------------|--------------|-------------|--------|--|
| 1.768713022            | 0.999044272                                  | 1.605714477  |             |        |  |
| ENSG00000135912        | 693.139738                                   | 510.6422034  | 459.1842017 |        |  |
| 865.0336932            | 619.8300627                                  | 872.1280748  | 554.3220477 |        |  |
| 785.6639436            | -0.502890277                                 | 0.02327805   | 0.126230883 | TTL4   |  |
| 2                      | 218710845                                    | 218755416    | + 7685      |        |  |
| protein_coding         | tubulin tyrosine ligase like 4               | [Source:HGNC |             |        |  |
| Symbol;Acc:HGNC:28976] | -                                            | 764 577      | 395 835     | 543    |  |
| 1011                   | 4.868309386                                  | 3.557610368  | 3.197864592 |        |  |
| 6.037465295            | 4.34313489                                   | 6.116997484  |             |        |  |
| ENSG00000157191        | 1679.321538                                  | 2248.772684  | 2157.584502 |        |  |
| 2171.389965            | 2772.683651                                  | 3005.434434  | 2028.559575 |        |  |
| 2649.836017            | -0.385764792                                 | 0.02328517   | 0.126230883 | NECAP2 |  |
| 1                      | 16440672                                     | 16460078     | + 5559      |        |  |
| protein_coding         | NECAP endocytosis associated 2               | [Source:HGNC |             |        |  |
| Symbol;Acc:HGNC:25528] | -                                            | 1851 2541    | 1856 2096   | 2429   |  |
| 3484                   | 16.30566172                                  | 21.65880204  | 20.77247019 |        |  |
| 20.95109123            | 26.85828024                                  | 29.14153945  |             |        |  |
| ENSG00000170606        | 5873.542754                                  | 5495.819901  | 5182.387775 |        |  |
| 6516.241833            | 6748.499688                                  | 6691.491074  | 5517.250143 |        |  |
| 6652.077532            | -0.269720775                                 | 0.023300003  | 0.126261747 | HSPA4  |  |
| 5                      | 133051962                                    | 133106449    | + 5153      |        |  |
| protein_coding         | heat shock protein family A (Hsp70) member 4 | [Source:HGNC |             |        |  |
| Symbol;Acc:HGNC:5237]  | -                                            | 6474 6210    |             | 4458   |  |
| 6290                   | 5912 7757                                    | 61.52352864  | 57.10286501 |        |  |
| 53.82533832            | 67.82699033                                  | 70.52151655  | 69.99462113 |        |  |
| ENSG00000166073        | 2561.169477                                  | 2533.741123  | 2636.531062 |        |  |
| 2952.51021             | 3308.043318                                  | 3187.451272  | 2577.147221 |        |  |
| 3149.334934            | -0.289329716                                 | 0.023305139  | 0.126261747 | GPR176 |  |
| 15                     | 39799032                                     | 39920892     | - 5119      |        |  |
| protein_coding         | G protein-coupled receptor 176               | [Source:HGNC |             |        |  |
| Symbol;Acc:HGNC:32370] | -                                            | 2823 2863    | 2268 2850   | 2898   |  |
| 3695                   | 27.0056374                                   | 26.50102424  | 27.56542973 |        |  |
| 30.93654245            | 34.79850704                                  | 33.56296587  |             |        |  |
| ENSG00000125124        | 402.8194289                                  | 361.0780225  | 346.4225117 |        |  |
| 298.3589265            | 207.7515127                                  | 247.577406   | 370.1066543 |        |  |
| 251.2292818            | 0.558743265                                  | 0.023327282  | 0.126343017 | BBS2   |  |
| 16                     | 56466836                                     | 56520283     | - 8337      |        |  |
| protein_coding         | Bardet-Biedl syndrome 2                      | [Source:HGNC |             |        |  |
| Symbol;Acc:HGNC:967]   | -                                            | 444 408      | 298 288     | 182    |  |
| 287                    | 2.607965561                                  | 2.318872138  | 2.223890037 |        |  |
| 1.91952923             | 1.341865375                                  | 1.600674821  |             |        |  |
| ENSG00000221890        | 162.3979229                                  | 129.2092924  | 237.1482966 |        |  |
| 109.8126605            | 89.0363626                                   | 7.763751407  | 176.2518373 |        |  |
| 68.87092482            | 1.35959725                                   | 0.023389012  | 0.126638575 | NPTXR  |  |
| 22                     | 38818452                                     | 38843982     | - 5784      |        |  |
| protein_coding         | neuronal pentraxin receptor                  | [Source:HGNC |             |        |  |
| Symbol;Acc:HGNC:7954]  | -                                            | 179 146      | 204 106     | 78     |  |
| 9                      | 1.51549124                                   | 1.196054618  | 2.194364303 |        |  |
| 1.018332547            | 0.828922024                                  | 0.072351117  |             |        |  |
| ENSG00000230836        | 29.03203091                                  | 1.769990306  | 8.137441549 |        |  |

|                                                                |              |             |             |              |                |             |
|----------------------------------------------------------------|--------------|-------------|-------------|--------------|----------------|-------------|
| 2.07193699                                                     | 0            | 0           | 12.97982092 | 0.690645663  |                |             |
| 4.252284295                                                    | 0.023471291  |             | 0.127045187 | LINC01293    | 2              |             |
| 74940258                                                       | 74942670     |             | +           | 1266         | lincRNA        | long        |
| intergenic non-protein coding RNA 1293 [Source:HGNC            |              |             |             |              |                |             |
| Symbol;Acc:HGNC:50362]                                         | -            | 32          | 2           | 7            | 2              | 0           |
| 0                                                              | 1.237784261  | 0.07485533  |             | 0.34401009   |                |             |
| 0.087782579                                                    | 0            | 0           |             |              |                |             |
| ENSG00000151694                                                | 927.2104872  |             | 707.1111273 | 861.4063126  |                |             |
| 798.7317096                                                    | 474.8606005  |             | 441.6711912 | 831.909309   |                |             |
| 571.7545004                                                    | 0.541299213  |             | 0.023487668 | 0.12705971   |                | ADAM17      |
| 2                                                              | 9488486      | 9556732     | -           | 10750        | protein_coding | ADAM        |
| metallopeptidase domain 17 [Source:HGNC Symbol;Acc:HGNC:195]   |              |             |             |              |                |             |
| 1022                                                           | 799          | 741         | 771         | 416          | 512            | 4.655551284 |
| 3.521800541                                                    | 4.28861036   |             | 3.985271904 | 2.378659217  |                |             |
| 2.21458582                                                     |              |             |             |              |                |             |
| ENSG00000226688                                                | 136.0876449  |             | 138.0592439 | 122.0616232  |                |             |
| 191.6541716                                                    | 186.063168   |             | 263.9675479 | 132.069504   |                |             |
| 213.8949625                                                    | -0.696382744 |             | 0.02348834  | 0.12705971   |                |             |
| ENTPD1-AS1                                                     | 10           | 95753206    | 96090238    | -            |                | 12528       |
| antisense ENTPD1 antisense RNA 1 [Source:HGNC                  |              |             |             |              |                |             |
| Symbol;Acc:HGNC:45203]                                         | -            | 150         | 156         | 105          | 185            | 163         |
| 306                                                            | 0.586324711  | 0.59002348  |             | 0.521452076  |                |             |
| 0.820544289                                                    | 0.799748105  |             | 1.135718499 |              |                |             |
| ENSG00000140988                                                | 30754.9005   |             | 38182.23089 | 38084.38894  |                |             |
| 38622.97743                                                    | 45061.53141  |             | 49175.60142 | 35673.84011  |                |             |
| 44286.70342                                                    | -0.312036401 |             | 0.023522198 | 0.127203962  |                | RPS2        |
| 16                                                             | 1962052      | 1964860     | -           | 2413         | protein_coding |             |
| ribosomal protein S2 [Source:HGNC Symbol;Acc:HGNC:10404]       |              |             |             |              |                |             |
| 33899                                                          | 43144        | 32761       | 37282       | 39476        | 57006          | 687.9521759 |
| 847.206982                                                     | 844.7081306  |             | 858.5269326 | 1005.59517   |                |             |
| 1098.485338                                                    |              |             |             |              |                |             |
| ENSG00000130749                                                | 1732.849345  |             | 1483.251877 | 1719.32515   |                |             |
| 1227.622666                                                    | 1135.784369  |             | 1465.623738 | 1645.142124  |                |             |
| 1276.343591                                                    | 0.3652341    |             | 0.023551463 | 0.127315803  |                | ZC3H4       |
| 19                                                             | 47064187     |             | 47113752    | -            | 6502           |             |
| protein_coding zinc finger CCCH-type containing 4 [Source:HGNC |              |             |             |              |                |             |
| Symbol;Acc:HGNC:17808]                                         | -            | 1910        | 1676        | 1479         | 1185           | 995         |
| 1699                                                           | 14.38517288  | 12.21387553 |             | 14.15233354  |                |             |
| 10.12706107                                                    | 9.406400713  | 12.15003228 |             |              |                |             |
| ENSG00000141295                                                | 425.500703   |             | 540.7320386 | 475.4590848  |                |             |
| 287.9992416                                                    | 415.5030255  |             | 291.5719973 | 480.5639421  |                |             |
| 331.6914214                                                    | 0.536707997  |             | 0.023557274 | 0.127315803  |                | SCRN2       |
| 17                                                             | 47837692     |             | 47841333    | -            | 3043           |             |
| protein_coding secernin 2 [Source:HGNC Symbol;Acc:HGNC:30381]  |              |             |             |              |                |             |
| 469                                                            | 611          | 409         | 278         | 364          | 338            | 7.547438344 |
| 9.514055898                                                    | 8.362347335  | 5.076388916 |             | 7.352699068  |                |             |
| 5.164707922                                                    |              |             |             |              |                |             |
| ENSG00000273056                                                | 0            | 0           | 0           | 13.46759043  | 12.55641011    |             |
| 0                                                              | 0            | 8.674666848 |             | -5.589051196 | 0.023584946    |             |
| 0.127403031                                                    | AL354694.1   | 9           |             | 7786105      | 7786688        | -           |

|                         |                                                          |                      |                     |             |
|-------------------------|----------------------------------------------------------|----------------------|---------------------|-------------|
| 584                     | lincRNA novel transcript                                 | -                    | 0                   | 0           |
| 0                       | 13 11 0 0                                                | 0                    | 0                   |             |
| 1.236922669             | 1.157783079                                              | 0                    |                     |             |
| ENSG00000221819         | 2.721752898                                              | 2.654985459          | 4.6499666           |             |
| 11.39565344             | 9.131934625                                              | 40.54403513          | 3.342234986         |             |
| 20.35720773             | -2.62663905                                              | 0.023587819          | 0.127403031         | GAS8-       |
| AS1 16                  | 90028908                                                 | 90029901             | - 994               |             |
| antisense               | GAS8 antisense RNA 1 [Source:HGNC                        |                      |                     |             |
| Symbol;Acc:HGNC:1197]   | -                                                        | 3 3                  | 4 11                | 8           |
| 47                      | 0.147796297                                              | 0.143008322          | 0.250368942         |             |
| 0.614919612             | 0.494710312                                              | 2.198581107          |                     |             |
| ENSG00000099260         | 1069.648889                                              | 1078.809092          | 1562.388777         |             |
| 1381.981972             | 2020.440536                                              | 1648.503216          | 1236.948919         |             |
| 1683.641908             | -0.445515932                                             | 0.023620931          | 0.127523217         | PALMD       |
| 1                       | 99645943                                                 | 99694541             | + 8244              |             |
| protein_coding          | palmdelphin [Source:HGNC Symbol;Acc:HGNC:15846] -        |                      |                     |             |
| 1179                    | 1219 1344 1334 1770                                      | 1911                 | 7.003328622         |             |
| 7.006355401             | 10.14303986                                              | 8.991453241          | 13.19722568         |             |
| 10.77838574             |                                                          |                      |                     |             |
| ENSG00000160172         | 77.11633211                                              | 70.79961225          | 97.64929859         |             |
| 141.9276838             | 149.5354295                                              | 138.8848863          | 81.85508098         |             |
| 143.4493332             | -0.812223055                                             | 0.023627574          | 0.127523217         |             |
| FAM86C2P                | 11 67791648                                              | 67805336             | - 3402              |             |
|                         | transcribed_unprocessed_pseudogene "family with sequence |                      |                     |             |
|                         | similarity 86 member C2, pseudogene [Source:HGNC         |                      |                     |             |
| Symbol;Acc:HGNC:42392]" | -                                                        | 85 80                | 84 137              | 131         |
| 161                     | 1.223526274                                              | 1.114248655          | 1.53621437          |             |
| 2.237681655             | 2.366924181                                              | 2.200506141          |                     |             |
| ENSG00000100439         | 293.042062                                               | 325.6782163          | 385.9472278         |             |
| 481.7253501             | 399.5221399                                              | 560.7153794          | 334.8891687         |             |
| 480.6542898             | -0.523982893                                             | 0.023631698          | 0.127523217         | ABHD4       |
| 14                      | 22598237                                                 | 22613215             | + 4070              |             |
| protein_coding          | abhydrolase domain containing 4 [Source:HGNC             |                      |                     |             |
| Symbol;Acc:HGNC:20154]  | -                                                        | 323 368              | 332 465             | 350         |
| 650                     | 3.886304242                                              | 4.284299767          | 5.075169146         |             |
| 6.348492156             | 5.285924982                                              | 7.425914859          |                     |             |
| ENSG00000125952         | 786.5865875                                              | 892.9601095          | 892.7935871         |             |
| 903.3645276             | 1188.292993                                              | 1360.381774          | 857.4467614         |             |
| 1150.679765             | -0.425043745                                             | 0.023702911          | 0.127868497         | MAX         |
| 14                      | 65006174                                                 | 65102695             | - 4430              |             |
| protein_coding          | MYC associated factor X [Source:HGNC                     |                      |                     |             |
| Symbol;Acc:HGNC:6913]   | bHLH                                                     | 867 1009             | 768 872             | 1041        |
| 1577                    | 9.583939308                                              | 10.79229681          | 10.78609747         |             |
| 10.93766965             | 14.44422894                                              | 16.55232425          |                     |             |
| ENSG00000236530         | 0 0 0                                                    | 20.7193699           | 5.707459141         |             |
| 0                       | 0                                                        | 8.808943013          | -5.612629889        | 0.023713562 |
| 0.127886949             | KPNA2P1 4                                                | 80079532             | 80081122            |             |
| +                       | 1591                                                     | processed_pseudogene | karyopherin subunit |             |
| alpha 2 pseudogene 1    | [Source:HGNC Symbol;Acc:HGNC:52871] -                    |                      |                     |             |
| 0                       | 0 0 20 5                                                 | 0                    | 0 0                 |             |

|                                      |                                                        |             |                      |              |
|--------------------------------------|--------------------------------------------------------|-------------|----------------------|--------------|
| 0                                    | 0.698508764                                            | 0.193173338 | 0                    |              |
| ENSG00000165264                      | 649.5916916                                            | 803.575599  | 925.3433533          |              |
| 591.5380106                          | 576.4533732                                            | 588.3198289 | 792.8368813          |              |
| 585.4370709                          | 0.436473112                                            | 0.023734518 | 0.127960956          | NDUFB6       |
| 9                                    | 32552999                                               | 32573184    | -                    | 1388         |
| protein_coding                       | NADH:ubiquinone oxidoreductase subunit B6 [Source:HGNC |             |                      |              |
| Symbol;Acc:HGNC:7701]                | -                                                      | 716 908     | 796 571              | 505          |
| 682                                  | 25.26109893                                            | 30.99722553 | 35.68046029          |              |
| 22.85907675                          | 22.36398911                                            | 22.84682876 |                      |              |
| ENSG00000273450                      | 1.814501932                                            | 7.079961225 | 3.48747495           |              |
| 15.53952742                          | 10.27342645                                            | 43.99459131 | 4.127312702          |              |
| 23.26918173                          | -2.494216254                                           | 0.023751084 | 0.12801125           |              |
| AL139124.1                           | 10                                                     | 94314907    | 94315327             | - 421        |
| antisense                            | "novel transcript, antisense to PLCE1"                 |             |                      | -            |
| 2                                    | 8                                                      | 3           | 15                   | 9 51         |
| 0.900397607                          | 0.443349278                                            | 1.979799485 | 1.314037544          |              |
| 5.632732129                          |                                                        |             |                      |              |
| ENSG00000225282                      | 8.165258694                                            | 6.194966072 | 6.974949899          | 0            |
| 0                                    | 0                                                      | 7.111724888 | 0                    | 5.263328953  |
| 0.02376471                           | 1                                                      | AP000350.2  | 22                   | 23926900     |
| 23929574                             | +                                                      | 1763        | processed_pseudogene | kelch-like 5 |
| (Drosophila) (KLHL5)                 | pseudogene                                             | -           | 9                    | 7 6 0        |
| 0                                    | 0                                                      | 0.249987838 | 0.188136114          | 0.211741402  |
| 0                                    | 0                                                      | 0           |                      |              |
| ENSG00000169221                      | 1604.019708                                            | 1793.885175 | 1908.811289          |              |
| 1820.196646                          | 2644.836566                                            | 2438.680581 | 1768.905391          |              |
| 2301.237931                          | -0.37976266                                            | 0.023808552 | 0.128281898          |              |
| TBC1D10B                             | 16                                                     | 30357102    | 30370264             | - 6699       |
| protein_coding                       | TBC1 domain family member 10B [Source:HGNC             |             |                      |              |
| Symbol;Acc:HGNC:24510]               | -                                                      | 1768 2027   | 1642 1757            | 2317         |
| 2827                                 | 12.92411954                                            | 14.33739372 | 15.25000625          |              |
| 14.5738343                           | 21.26000764                                            | 19.62216163 |                      |              |
| ENSG00000008311                      | 388.3034134                                            | 279.6584684 | 223.1983968          |              |
| 233.0929114                          | 159.8088559                                            | 160.4508624 | 297.0534262          |              |
| 184.4508766                          | 0.689339033                                            | 0.023826123 | 0.128331604          | AASS         |
| 7                                    | 122075647                                              | 122144280   | -                    | 4591         |
| protein_coding                       | aminoadipate-semialdehyde synthase [Source:HGNC        |             |                      |              |
| Symbol;Acc:HGNC:17366]               | -                                                      | 428 316     | 192 225              | 140          |
| 186                                  | 4.565256251                                            | 3.26141625  | 2.601960999          |              |
| 2.723248474                          | 1.874425152                                            | 1.883808142 |                      |              |
| ENSG00000121579                      | 6570.311496                                            | 6933.05203  | 5513.697895          |              |
| 7769.763712                          | 7302.123225                                            | 8365.873461 | 6339.020474          |              |
| 7812.586799                          | -0.301424149                                           | 0.023837725 | 0.128331604          | NAA50        |
| 3                                    | 113716460                                              | 113746300   | -                    | 6436         |
| protein_coding                       | "N(alpha)-acetyltransferase 50, NatE catalytic subunit |             |                      |              |
| [Source:HGNC Symbol;Acc:HGNC:29533]" | -                                                      |             | 7242 7834            | 4743         |
| 7500                                 | 6397 9698                                              | 55.10248292 | 57.67584587          |              |
| 45.8504852                           | 64.752609                                              | 61.09528225 | 70.06436051          |              |
| ENSG00000163947                      | 284.8768033                                            | 280.5434635 | 237.1482966          |              |
| 557.3510503                          | 339.023073                                             | 328.6654763 | 267.5228545          |              |

|                                     |                                                       |                |                          |             |            |
|-------------------------------------|-------------------------------------------------------|----------------|--------------------------|-------------|------------|
| 408.3465332                         | -0.608748016                                          | 0.023839542    | 0.128331604              |             |            |
| ARHGEF3 3                           | 56727418                                              | 57079329       | -                        | 6594        |            |
| protein_coding                      | Rho guanine nucleotide exchange factor 3 [Source:HGNC |                |                          |             |            |
| Symbol;Acc:HGNC:683]                | -                                                     | 314            | 317                      | 204         | 538 297    |
| 381                                 | 2.331897135                                           | 2.277911044    | 1.924810908              |             |            |
| 4.533622724                         | 2.768565908                                           | 2.686624996    |                          |             |            |
| ENSG00000108786                     | 118.8498765                                           | 139.8292342    | 119.7366399              |             |            |
| 178.1865811                         | 175.7897415                                           | 273.4565774    | 126.1385836              |             |            |
| 209.1443                            | -0.730916947                                          | 0.023850073    | 0.128349239              |             |            |
| HSD17B1 17                          | 42549214                                              | 42555213       | +                        | 5658        |            |
| protein_coding                      | hydroxysteroid 17-beta dehydrogenase 1 [Source:HGNC   |                |                          |             |            |
| Symbol;Acc:HGNC:5210]               | -                                                     | 131            | 158                      | 103         | 172 154    |
| 317                                 | 1.133801523                                           | 1.323185048    | 1.132611921              |             |            |
| 1.689186288                         | 1.673035429                                           | 2.605117626    |                          |             |            |
| ENSG00000146109                     | 655.0351974                                           | 819.5055118    | 712.6073814              |             |            |
| 831.8827014                         | 1021.635186                                           | 1055.870191    | 729.0493635              |             |            |
| 969.7960263                         | -0.41163759                                           | 0.023919384    | 0.128683084              |             | ABT1       |
| 6                                   | 26596952                                              | 26600744       | +                        | 2949        |            |
| protein_coding                      | activator of basal transcription 1 [Source:HGNC       |                |                          |             |            |
| Symbol;Acc:HGNC:17369]              | -                                                     | 722            | 926                      | 613         | 803 895    |
| 1224                                | 11.98922494                                           | 14.8786201     | 12.93279962              |             |            |
| 15.13048385                         | 18.65501588                                           | 19.29912697    |                          |             |            |
| ENSG00000101440                     | 0                                                     | 19.46989337    | 6.974949899              | 0           | 0          |
| 0                                   | 8.814947756                                           | 0              | 5.574294817              | 0.023980788 |            |
| 0.128936501                         | ASIP                                                  | 20             | 34194569                 | 34269344    |            |
| +                                   | 778                                                   | protein_coding | agouti signaling protein |             |            |
| [Source:HGNC Symbol;Acc:HGNC:745]   | -                                                     | 0              | 22                       | 6           |            |
| 0                                   | 0                                                     | 0              | 0                        | 1.339891169 | 0.47982017 |
| 0                                   | 0                                                     | 0              |                          |             |            |
| ENSG00000137094                     | 202.3169654                                           | 144.25421      | 231.3358383              |             |            |
| 122.2442824                         | 67.34801786                                           | 133.709052     | 192.6356712              |             |            |
| 107.7671174                         | 0.832878196                                           | 0.023981263    | 0.128936501              |             | DNAJB5     |
| 9                                   | 34989641                                              | 34998900       | +                        | 5891        |            |
| protein_coding                      | DnaJ heat shock protein family (Hsp40) member B5      |                |                          |             |            |
| [Source:HGNC Symbol;Acc:HGNC:14887] | -                                                     |                | 223                      | 163         | 199        |
| 118                                 | 59                                                    | 155            | 1.853721657              | 1.311067411 |            |
| 2.101700852                         | 1.113025279                                           | 0.615616638    | 1.223414697              |             |            |
| ENSG00000176531                     | 124.2933823                                           | 192.9289434    | 167.3987976              |             |            |
| 130.5320304                         | 351.5794831                                           | 392.5007656    | 161.5403744              |             |            |
| 291.5374263                         | -0.852552864                                          | 0.023988356    | 0.128936501              |             | PHLDB3     |
| 19                                  | 43474954                                              | 43504935       | -                        | 4553        |            |
| protein_coding                      | pleckstrin homology like domain family B member 3     |                |                          |             |            |
| [Source:HGNC Symbol;Acc:HGNC:30499] | -                                                     |                | 137                      | 218         | 144        |
| 126                                 | 308                                                   | 455            | 1.473504954              | 2.268742904 |            |
| 1.967758008                         | 1.537747177                                           | 4.158152628    | 4.646701391              |             |            |
| ENSG00000198900                     | 3807.732304                                           | 3116.952929    | 3923.409318              |             |            |
| 2977.373454                         | 2950.756376                                           | 2802.714258    | 3616.031517              |             |            |
| 2910.281363                         | 0.313104354                                           | 0.024012911    | 0.129013326              |             | TOP1       |
| 20                                  | 41028818                                              | 41124487       | +                        | 3738        |            |
| protein_coding                      | DNA topoisomerase I [Source:HGNC                      |                |                          |             |            |

|                         |                                         |              |           |                  |                |        |
|-------------------------|-----------------------------------------|--------------|-----------|------------------|----------------|--------|
| Symbol;Acc:HGNC:11986]  | -                                       | 4197         | 3522      | 3375             | 2874           | 2585   |
| 3249                    | 54.98299031                             | 44.64537708  |           | 56.17477308      |                |        |
| 42.72278055             | 42.50779824                             | 40.41489292  |           |                  |                |        |
| ENSG00000164929         | 47.17705023                             | 57.52468495  |           | 77.88694054      |                |        |
| 20.7193699              | 25.11282022                             | 28.46708849  |           | 60.86289191      |                |        |
| 24.7664262              | 1.292680611                             | 0.024017236  |           | 0.129013326      |                | BAALC  |
| 8                       | 103140710                               | 103230305    |           | + 3997           |                |        |
| protein_coding          | "BAALC, MAP3K1 and KLF4 binding         | [Source:HGNC |           |                  |                |        |
| Symbol;Acc:HGNC:14333]" | -                                       | 52           | 65        | 67               | 20             | 22     |
| 33                      | 0.637085732                             | 0.77055856   |           | 1.042911607      |                |        |
| 0.278040391             | 0.338326404                             | 0.383893545  |           |                  |                |        |
| ENSG00000279583         | 3.629003864                             | 5.309970919  |           | 12.78740815      |                | 0      |
| 0                       | 0                                       | 7.242127644  | 0         | 5.285069242      |                |        |
| 0.024026791             | 1                                       | AC009086.3   | 16        | 29595130         |                |        |
| 29596137                | -                                       | 1008         | TEC       | novel transcript |                | -      |
| 4                       | 6                                       | 11           | 0         | 0                | 0.194324761    |        |
| 0.282044191             | 0.678951887                             | 0            | 0         | 0                |                |        |
| ENSG00000171853         | 605.1363943                             | 673.4813115  |           | 621.9330327      |                |        |
| 679.5953327             | 990.8149069                             | 908.3589147  |           | 633.5169128      |                |        |
| 859.5897181             | -0.439972827                            | 0.024049051  |           | 0.129145012      |                |        |
| TRAPPC12                | 2                                       | 3379675      | 3485094   | + 9193           | protein_coding |        |
|                         | trafficking protein particle complex 12 | [Source:HGNC |           |                  |                |        |
| Symbol;Acc:HGNC:24284]  | -                                       | 667          | 761       | 535              | 656            | 868    |
| 1053                    | 3.55301677                              | 3.922417677  |           | 3.620790261      |                |        |
| 3.965140886             | 5.803765082                             | 5.32601186   |           |                  |                |        |
| ENSG00000182197         | 1599.483453                             | 1708.925641  |           | 1483.339345      |                |        |
| 1606.787136             | 2324.077362                             | 2348.96612   |           | 1597.24948       |                |        |
| 2093.276873             | -0.390002064                            | 0.024075525  |           | 0.129247937      |                | EXT1   |
| 8                       | 117794490                               | 118111853    |           | - 8325           |                |        |
| protein_coding          | exostosin glycosyltransferase 1         | [Source:HGNC |           |                  |                |        |
| Symbol;Acc:HGNC:3512]   | -                                       | 1763         | 1931      | 1276             | 1551           | 2036   |
| 2723                    | 10.37042974                             | 10.9906777   |           | 9.536154503      |                |        |
| 10.35236556             | 15.03283503                             | 15.20878139  |           |                  |                |        |
| ENSG00000111276         | 578.8261163                             | 608.8766653  |           | 753.2945891      |                |        |
| 343.9415403             | 445.181813                              | 564.1659356  |           | 646.9991236      |                |        |
| 451.0964296             | 0.518225813                             | 0.024101819  |           | 0.12934984       |                | CDKN1B |
| 12                      | 12715058                                | 12722371     |           | + 2811           |                |        |
| protein_coding          | cyclin dependent kinase inhibitor 1B    | [Source:HGNC |           |                  |                |        |
| Symbol;Acc:HGNC:1785]   | -                                       | 638          | 688       | 648              | 332            | 390    |
| 654                     | 11.11446383                             | 11.59722367  |           | 14.3423728       |                |        |
| 6.562801697             | 8.52807717                              | 10.81802351  |           |                  |                |        |
| ENSG00000255857         | 12.70151352                             | 46.90474312  |           | 46.499666        |                |        |
| 12.43162194             | 7.990442797                             | 7.763751407  |           | 35.36864088      |                |        |
| 9.395272048             | 1.911819237                             | 0.024150103  |           | 0.129532825      |                | PXN-   |
| AS1                     | 12                                      | 120201291    | 120213138 | + 2380           |                |        |
| antisense               | PXN antisense RNA 1                     | [Source:HGNC |           |                  |                |        |
| Symbol;Acc:HGNC:44123]  | -                                       | 14           | 53        | 40               | 12             | 7      |
| 9                       | 0.288057881                             | 1.05517709   |           | 1.045658521      |                |        |
| 0.280166583             | 0.180787518                             | 0.175831455  |           |                  |                |        |
| ENSG00000163517         | 88.0033437                              | 59.29467526  |           | 125.5490982      |                |        |

|                                     |                                                 |               |                  |         |
|-------------------------------------|-------------------------------------------------|---------------|------------------|---------|
| 52.83439324                         | 42.23519764                                     | 28.46708849   | 90.94903905      |         |
| 41.17889313                         | 1.143527556                                     | 0.02415056    | 0.129532825      | HDAC11  |
| 3                                   | 13479724                                        | 13506424      | + 5281           |         |
| protein_coding                      | histone deacetylase 11 [Source:HGNC             |               |                  |         |
| Symbol;Acc:HGNC:19086]              | -                                               | 97 67         | 108 51           | 37      |
| 33                                  | 0.899464962                                     | 0.601153079   | 1.27237297       |         |
| 0.536619008                         | 0.430658394                                     | 0.290555292   |                  |         |
| ENSG00000122778                     | 571.5681086                                     | 565.5119028   | 508.008851       |         |
| 498.300846                          | 316.1932364                                     | 326.9401982   | 548.3629541      |         |
| 380.4780935                         | 0.527972048                                     | 0.024166586   | 0.129579492      |         |
| KIAA1549                            | 7                                               | 138831381     | 138981318        | - 12427 |
| protein_coding                      | KIAA1549 [Source:HGNC Symbol;Acc:HGNC:22219]    |               |                  |         |
| -                                   | 630 639                                         | 437 481       | 277 379          |         |
| 2.482578184                         | 2.43646962                                      | 2.187872378   | 2.150754408      |         |
| 1.37012702                          | 1.418090442                                     |               |                  |         |
| ENSG00000234405                     | 9.979760626                                     | 4.424975766   | 6.974949899      | 0       |
| 0                                   | 0                                               | 7.126562097 0 | 5.266220442      |         |
| 0.024210777                         | 1                                               | Z69733.1 X    | 103497523        |         |
| 103500317                           | + 632                                           | antisense     | novel transcript |         |
| -                                   | 11 5                                            | 6 0           | 0 0              |         |
| 0.852323162                         | 0.374868861                                     | 0.590664703   | 0 0              | 0       |
| ENSG00000114790                     | 323.8885949                                     | 352.2280709   | 285.9729459      |         |
| 246.5605018                         | 180.3557089                                     | 216.5224004   | 320.6965372      |         |
| 214.479537                          | 0.580475245                                     | 0.024229378   | 0.12987681       |         |
| ARHGEF26                            | 3                                               | 154121003     | 154257827        | + 5489  |
| protein_coding                      | Rho guanine nucleotide exchange factor 26       |               |                  |         |
| [Source:HGNC Symbol;Acc:HGNC:24490] | -                                               |               | 357 398          | 246     |
| 238                                 | 158 251                                         | 3.184957701   | 3.435708285      |         |
| 2.788359223                         | 2.409327124                                     | 1.769339676   | 2.126236204      |         |
| ENSG00000152240                     | 713.0992593                                     | 811.5405554   | 852.1063794      |         |
| 695.1348601                         | 448.6062885                                     | 576.2428822   | 792.2487313      |         |
| 573.3280103                         | 0.465583266                                     | 0.024314405   | 0.130293098      | HAUS1   |
| 18                                  | 46104332                                        | 46128333      | + 2165           |         |
| protein_coding                      | HAUS augmin like complex subunit 1 [Source:HGNC |               |                  |         |
| Symbol;Acc:HGNC:25174]              | -                                               | 786 917       | 733 671          | 393     |
| 668                                 | 17.77842684                                     | 20.06956114   | 21.06458564      |         |
| 17.22172552                         | 11.15788831                                     | 14.34661949   |                  |         |
| ENSG00000198382                     | 663.2004561                                     | 659.3213891   | 631.2329659      |         |
| 879.5372522                         | 752.2431148                                     | 940.2765594   | 651.2516037      |         |
| 857.3523088                         | -0.397157785                                    | 0.024327946   | 0.130326175      | UVRAG   |
| 11                                  | 75815167                                        | 76143195      | + 6352           |         |
| protein_coding                      | UV radiation resistance associated [Source:HGNC |               |                  |         |
| Symbol;Acc:HGNC:12640]              | -                                               | 731 745       | 543 849          | 659     |
| 1090                                | 5.635540447                                     | 5.557407261   | 5.318586009      |         |
| 7.426928526                         | 6.37708617                                      | 7.978973573   |                  |         |
| ENSG00000158555                     | 406.4484328                                     | 424.7976735   | 511.496326       |         |
| 523.1640899                         | 623.2545382                                     | 716.8530466   | 447.5808107      |         |
| 621.0905582                         | -0.474545747                                    | 0.024378385   | 0.130556842      | GDPD5   |
| 11                                  | 75434640                                        | 75525903      | - 9867           |         |
| protein_coding                      | glycerophosphodiester phosphodiesterase domain  |               |                  |         |

|                                                             |              |             |                          |              |                  |             |
|-------------------------------------------------------------|--------------|-------------|--------------------------|--------------|------------------|-------------|
| containing 5 [Source:HGNC Symbol;Acc:HGNC:28804]            |              |             |                          |              | -                | 448         |
| 480                                                         | 440          | 505         | 546                      | 831          | 2.223420315      |             |
| 2.305061675                                                 | 2.77443398   |             | 2.843926012              |              | 3.401377815      |             |
| 3.916038147                                                 |              |             |                          |              |                  |             |
| ENSG00000133678                                             | 198.6879615  |             | 199.1239095              |              | 192.9736139      |             |
| 211.337573                                                  | 334.4571057  |             | 378.6985409              |              | 196.928495       |             |
| 308.1644065                                                 | -0.646637799 |             | 0.024406365              |              | 0.130667126      |             |
| TMEM254 10                                                  | 80078646     |             | 80092557                 |              | + 2996           |             |
| protein_coding transmembrane protein 254 [Source:HGNC       |              |             |                          |              |                  |             |
| Symbol;Acc:HGNC:25804]                                      | -            |             | 219                      | 225          | 166              | 204 293     |
| 439                                                         | 3.579571069  |             | 3.558501473              |              | 3.447252741      |             |
| 3.783558054                                                 | 6.011366012  |             | 6.813240657              |              |                  |             |
| ENSG00000218725                                             | 0            | 0           | 0                        | 8.287747959  | 0                |             |
| 17.25278091                                                 | 0            | 8.513509622 |                          | -5.57015048  | 0.024422042      |             |
| 0.130711497                                                 |              | B3GALNT2P1  | 6                        |              | 129800908        |             |
| 129802214                                                   | +            | 1295        | processed_pseudogene     | "beta-1,3-N- |                  |             |
| acetylgalactosaminyltransferase 2 pseudogene 1 [Source:HGNC |              |             |                          |              |                  |             |
| Symbol;Acc:HGNC:51315]"                                     | -            |             | 0                        | 0            | 0                | 8 0         |
| 20                                                          | 0            | 0           | 0                        | 0.343267164  | 0                |             |
| 0.718110448                                                 |              |             |                          |              |                  |             |
| ENSG00000232821                                             | 9.979760626  |             | 7.964956378              |              | 3.48747495       | 0           |
| 0                                                           | 0            | 7.144063985 | 0                        |              | 5.272770272      |             |
| 0.02442739                                                  | 1            | AC003986.2  | 7                        |              | 19112474         |             |
| 19114271                                                    | +            | 1711        | antisense                |              | novel transcript |             |
| -                                                           | 11           | 9           | 3                        | 0            | 0                | 0           |
| 0.314826556                                                 | 0.249240688  |             | 0.109088279              |              | 0                | 0           |
| ENSG00000254302                                             | 9.979760626  |             | 7.964956378              |              | 3.48747495       | 0           |
| 0                                                           | 0            | 7.144063985 | 0                        |              | 5.272770272      |             |
| 0.02442739                                                  | 1            | AC087855.2  | 8                        |              | 34174886         |             |
| 34184895                                                    | +            | 537         | lincRNA novel transcript |              |                  | -           |
| 11                                                          | 9            | 3           | 0                        | 0            | 0                | 1.003106589 |
| 0.794135599                                                 |              | 0.347579229 | 0                        |              | 0                |             |
| ENSG00000176887                                             | 1362.690951  |             | 1443.427095              |              | 1608.888443      |             |
| 880.5732207                                                 | 1275.046372  |             | 1190.441882              |              | 1471.66883       |             |
| 1115.353825                                                 | 0.399664663  |             | 0.024512247              |              | 0.131140266      | SOX11       |
| 2                                                           | 5692667      | 5701385     | +                        | 8719         | protein_coding   | SRY-        |
| box 11 [Source:HGNC Symbol;Acc:HGNC:11191]                  |              |             |                          |              | HMG              | 1502 1631   |
| 1384                                                        | 850          | 1117        | 1380                     | 8.435910016  | 8.863672971      |             |
| 9.875890342                                                 |              | 5.417068055 |                          | 7.874697064  | 7.359417258      |             |
| ENSG00000068885                                             | 329.3321007  |             | 226.5587592              |              | 203.4360387      |             |
| 176.1146441                                                 | 124.4226093  |             | 167.3519748              |              | 253.1089662      |             |
| 155.9630761                                                 | 0.698401516  |             | 0.024521734              |              | 0.131140266      | IFT80       |
| 3                                                           | 160256986    |             | 160399880                |              | -                | 7175        |
| protein_coding intraflagellar transport 80 [Source:HGNC     |              |             |                          |              |                  |             |
| Symbol;Acc:HGNC:29262]                                      | -            |             | 363                      | 256          | 175              | 170 109     |
| 194                                                         | 2.477498517  |             | 1.690614154              |              | 1.517480049      |             |
| 1.31655516                                                  | 0.933795878  |             | 1.25721873               |              |                  |             |
| ENSG00000120948                                             | 2700.886126  |             | 2608.080716              |              | 2613.281229      |             |
| 2251.159539                                                 | 2101.486456  |             | 2133.306359              |              | 2640.749357      |             |
| 2161.984118                                                 | 0.288616186  |             | 0.024524394              |              | 0.131140266      | TARDBP      |



|                        |                   |                        |              |              |             |
|------------------------|-------------------|------------------------|--------------|--------------|-------------|
| 1                      | 11012344          | 11026420               | +            | 6071         |             |
| protein_coding         | TAR DNA binding   | protein                | [Source:HGNC |              |             |
| Symbol;Acc:HGNC:11571] | -                 | 2977                   | 2947         | 2248         | 2173        |
| 2473                   | 24.0130478        | 23.00098018            |              | 23.03790169  | 1841        |
| 19.8889354             | 18.63978574       | 18.94065099            |              |              |             |
| ENSG00000185238        | 638.70468         | 553.1219707            |              | 560.3209752  |             |
| 467.2217912            | 454.3137476       | 337.2918667            |              | 584.0492087  |             |
| 419.6091352            | 0.478766591       | 0.024609942            |              | 0.13155795   | PRMT3       |
| 11                     | 20387530          | 20509294               | +            | 5467         |             |
| protein_coding         | protein arginine  | methyltransferase 3    | [Source:HGNC |              |             |
| Symbol;Acc:HGNC:30163] | -                 | 704                    | 625          | 482          | 451         |
| 391                    | 6.305975351       | 5.416981898            |              | 5.485355904  | 398         |
| 4.583946198            | 4.474879637       | 3.325513396            |              |              |             |
| ENSG00000008735        | 9.07250966        | 7.964956378            |              | 2.3249833    |             |
| 33.15099184            | 6.848950969       | 52.62098176            |              | 6.454149779  |             |
| 30.87364152            | -2.2473059        | 0.024631929            |              | 0.131592808  |             |
| MAPK8IP2               | 22                | 50600685               |              | 50613981     | +           |
|                        |                   |                        |              |              | 5901        |
| protein_coding         | mitogen-activated | protein kinase 8       | interacting  |              |             |
| protein 2              | [Source:HGNC      | Symbol;Acc:HGNC:6883]  | -            | 10           | 9           |
| 2                      | 32                | 6                      | 61           | 0.082985663  | 0.072267551 |
|                        | 0.021086827       | 0.301325862            |              | 0.06249899   | 0.480656963 |
| ENSG00000220472        | 33.56828574       | 38.93978674            |              | 34.8747495   |             |
| 73.55376314            | 68.48950969       | 87.98918262            |              | 35.79427399  |             |
| 76.67748515            | -1.099840888      | 0.024634088            |              | 0.131592808  |             |
| AL139095.2             | 6                 | 7338839                | 7339568      | -            | 730         |
| processed_pseudogene   | ribosomal         | protein S3 (RPS3)      | pseudogene   | -            |             |
|                        | 37                | 44                     | 30           | 71           | 60          |
|                        | 2.855987203       | 2.556849945            |              | 5.404400584  | 5.052144347 |
|                        | 6.496932127       |                        |              |              |             |
| ENSG00000257242        | 13.60876449       | 14.15992245            |              | 16.2748831   |             |
| 31.07905485            | 13.69790194       | 107.8298807            |              | 14.68119001  |             |
| 50.86894581            | -1.800530156      | 0.02463878             |              | 0.131592808  |             |
| LINC01619              | 12                | 91984976               |              | 92142914     | -           |
|                        |                   |                        |              |              | 3642        |
| processed_transcript   | long              | intergenic             | non-protein  | coding       | RNA         |
| 1619                   | [Source:HGNC      | Symbol;Acc:HGNC:27409] | -            | 15           | 16          |
|                        | 14                | 30                     | 12           | 125          | 0.201687973 |
|                        | 0.239163522       | 0.457713115            |              | 0.202529675  | 1.595883151 |
| ENSG00000095261        | 931.7467421       | 952.2547848            |              | 1029.967602  |             |
| 1218.29895             | 1201.990895       | 1270.667314            |              | 971.3230429  |             |
| 1230.319053            | -0.341666727      | 0.024678105            |              | 0.131763057  | PSMD5       |
| 9                      | 120815496         | 120842984              |              | -            | 4432        |
| protein_coding         | "proteasome 26S   | subunit, non-ATPase 5  | [Source:HGNC |              |             |
| Symbol;Acc:HGNC:9563]" | -                 | 1027                   | 1076         | 886          | 1176        |
| 1473                   | 11.34747868       | 11.50373743            |              | 12.43772118  | 1053        |
| 14.74414569            | 14.60413973       | 15.45375466            |              |              |             |
| ENSG00000108256        | 4428.291965       | 3973.628238            |              | 3756.010521  |             |
| 4787.210415            | 4849.057286       | 5187.048579            |              | 4052.643574  |             |
| 4941.105427            | -0.285874507      | 0.02472647             |              | 0.131981448  | NUFIP2      |
| 17                     | 29255836          | 29294118               |              | -            | 10850       |
| protein_coding         | "NUFIP2, FMR1     | interacting            | protein 2    | [Source:HGNC |             |

|                        |                                                      |             |                          |              |                |        |
|------------------------|------------------------------------------------------|-------------|--------------------------|--------------|----------------|--------|
| Symbol;Acc:HGNC:17634] | -                                                    | 4881        | 4490                     | 3231         | 4621           | 4248   |
| 6013                   | 22.0296579                                           | 19.60844    |                          | 18.52738245  |                |        |
| 23.6656411             | 24.06590124                                          | 25.76869848 |                          |              |                |        |
| ENSG00000224330        | 0                                                    | 0           | 0                        | 18.64743291  | 0              |        |
| 6.901112362            | 0                                                    | 8.516181757 |                          | -5.567174369 | 0.024840794    |        |
|                        | 0.132551673                                          | AC005019.2  | 7                        | 13854355     |                |        |
| 13859025               | -                                                    | 359         | lincRNA novel transcript |              |                | -      |
|                        | 0                                                    | 0           | 18                       | 0            | 8              | 0      |
|                        | 0                                                    | 2.786057659 | 0                        | 1.036159365  |                |        |
| ENSG00000157315        | 17.23776835                                          | 41.5947722  |                          | 27.8997996   |                |        |
| 68.37392066            | 150.6769213                                          | 25.01653231 |                          | 28.91078005  |                |        |
| 81.35579143            | -1.487611927                                         | 0.024851203 |                          | 0.132567226  |                | TMED6  |
|                        | 16                                                   | 69343248    | 69351809                 | -            | 1411           |        |
| protein_coding         | transmembrane p24 trafficking protein 6 [Source:HGNC |             |                          |              |                |        |
| Symbol;Acc:HGNC:28331] | -                                                    | 19          | 47                       | 24           | 66             | 132    |
|                        | 29                                                   | 0.659409608 | 1.578328087              | 1.058256817  |                |        |
| 2.599135766            | 5.750349979                                          | 0.955656905 |                          |              |                |        |
| ENSG00000129003        | 1212.087291                                          | 739.855948  |                          | 861.4063126  |                |        |
| 781.1202452            | 679.1876378                                          | 523.6219005 |                          | 937.7831837  |                |        |
| 661.3099278            | 0.504928446                                          | 0.024868506 |                          | 0.132619536  |                | VPS13C |
|                        | 15                                                   | 61852389    | 62060473                 | -            | 19703          |        |
| protein_coding         | vacuolar protein sorting 13 homolog C [Source:HGNC   |             |                          |              |                |        |
| Symbol;Acc:HGNC:23594] | -                                                    | 1336        | 836                      | 741          | 754            | 595    |
|                        | 607                                                  | 3.320494646 | 2.010482795              | 2.339875215  |                |        |
| 2.126429713            | 1.856230775                                          | 1.432475991 |                          |              |                |        |
| ENSG00000198833        | 1161.281236                                          | 1097.39399  |                          | 1122.966934  |                |        |
| 972.7744167            | 912.0519707                                          | 612.4737221 |                          | 1127.214053  |                |        |
| 832.4333699            | 0.438530804                                          | 0.024877402 |                          | 0.132626994  |                | UBE2J1 |
|                        | 6                                                    | 89326625    | 89352848                 | -            | 4290           |        |
| protein_coding         | ubiquitin conjugating enzyme E2 J1 [Source:HGNC      |             |                          |              |                |        |
| Symbol;Acc:HGNC:17598] | -                                                    | 1280        | 1240                     | 966          | 939            | 799    |
|                        | 710                                                  | 14.61104778 | 13.69590812              | 14.00963049  |                |        |
| 12.16242972            | 11.44819049                                          | 7.695415516 |                          |              |                |        |
| ENSG00000197859        | 46.26979926                                          | 26.54985459 |                          | 11.6249165   |                | 0      |
|                        | 11.41491828                                          | 0           | 28.14819012              | 3.804972761  |                |        |
| 2.92661563             | 0.025021673                                          | 0.133355942 |                          | ADAMTSL2     |                | 9      |
|                        | 133532164                                            | 133575519   | +                        | 4677         | protein_coding |        |
|                        | ADAMTS like 2 [Source:HGNC Symbol;Acc:HGNC:14631]    |             |                          |              |                |        |
|                        | 51                                                   | 30          | 10                       | 0            | 10             | 0      |
|                        | 0.303934728                                          | 0.133026902 | 0                        | 0.131425607  |                | 0      |
| ENSG00000183309        | 1244.748325                                          | 1412.452264 |                          | 1041.592518  |                |        |
| 1536.341278            | 1607.220494                                          | 1610.547098 |                          | 1232.931036  |                |        |
| 1584.702957            | -0.361258151                                         | 0.025074958 |                          | 0.13359968   |                | ZNF623 |
|                        | 8                                                    | 143636013   | 143656418                | +            | 7146           |        |
| protein_coding         | zinc finger protein 623 [Source:HGNC                 |             |                          |              |                |        |
| Symbol;Acc:HGNC:29084] | zf-C2H2                                              | 1372        | 1596                     | 896          | 1483           | 1408   |
|                        | 1867                                                 | 9.401989959 | 10.58269588              | 7.801028138  |                |        |
| 11.53161629            | 12.11119518                                          | 12.14821094 |                          |              |                |        |
| ENSG00000159176        | 3923.860428                                          | 4753.308967 |                          | 4973.139278  |                |        |
| 5124.936144            | 5812.476389                                          | 6003.105116 |                          | 4550.102891  |                |        |

|                                     |                                                  |                |                      |        |
|-------------------------------------|--------------------------------------------------|----------------|----------------------|--------|
| 5646.839216                         | -0.311764169                                     | 0.025087273    | 0.133625042          | CSRP1  |
| 1                                   | 201483530                                        | 201509456      | - 10318              |        |
| protein_coding                      | cysteine and glycine rich protein 1 [Source:HGNC |                |                      |        |
| Symbol;Acc:HGNC:2469]               | -                                                | 4325 5371      | 4278 4947            | 5092   |
| 6959                                | 20.52670646                                      | 24.66528112    | 25.79598426          |        |
| 26.6414851                          | 30.33473684                                      | 31.36045326    |                      |        |
| ENSG00000198586                     | 1145.85797                                       | 861.9852791    | 1005.555277          |        |
| 840.1704494                         | 633.5279646                                      | 774.6498627    | 1004.466175          |        |
| 749.4494256                         | 0.421911334                                      | 0.025101194    | 0.133635163          | TLK1   |
| 2                                   | 170990823                                        | 171231314      | - 9405               |        |
| protein_coding                      | tousled like kinase 1 [Source:HGNC               |                |                      |        |
| Symbol;Acc:HGNC:11841]              | -                                                | 1263 974       | 865 811              | 555    |
| 898                                 | 6.576173068                                      | 4.907119089    | 5.722214772          |        |
| 4.791528746                         | 3.62728386                                       | 4.439648171    |                      |        |
| ENSG00000108262                     | 2719.938396                                      | 2877.119243    | 2888.79175           |        |
| 2910.035502                         | 3597.982242                                      | 4338.211759    | 2828.616463          |        |
| 3615.409834                         | -0.354370298                                     | 0.025104282    | 0.133635163          | GIT1   |
| 17                                  | 29573469                                         | 29594054       | - 5635               |        |
| protein_coding                      | GIT ArfGAP 1 [Source:HGNC Symbol;Acc:HGNC:4272]  | -              |                      |        |
| 2998                                | 3251 2485                                        | 2809 3152      | 5029 26.05351904     |        |
| 27.33691422                         | 27.43717033                                      | 27.69936815    | 34.38267393          |        |
| 41.49719421                         |                                                  |                |                      |        |
| ENSG00000134109                     | 2542.117207                                      | 2523.121182    | 2071.56012           |        |
| 2441.777742                         | 1407.459424                                      | 1250.826616    | 2378.932836          |        |
| 1700.021261                         | 0.485198717                                      | 0.02511743     | 0.133664925          | EDEM1  |
| 3                                   | 5187646 5219957 +                                | 6758           | protein_coding       | ER     |
| degradation enhancing               | alpha-mannosidase like protein 1 [Source:HGNC    |                |                      |        |
| Symbol;Acc:HGNC:18967]              | -                                                | 2802 2851      | 1782 2357            | 1233   |
| 1450                                | 20.30386079                                      | 19.98966292    | 16.40576019          |        |
| 19.3799851                          | 11.2148185                                       | 9.976560325    |                      |        |
| ENSG00000130045                     | 6.350756762                                      | 19.46989337    | 0 0 0                |        |
| 0                                   | 8.606883377                                      | 0 5.543093408  | 0.025138828          |        |
| 0.133738565                         | NXNL2                                            | 9 88534033     | 88584274             |        |
| +                                   | 2498                                             | protein_coding | nucleoredoxin like 2 |        |
| [Source:HGNC Symbol;Acc:HGNC:30482] | -                                                | 7 22           | 0                    |        |
| 0                                   | 0 0                                              | 0.137225332    | 0.417307978          | 0      |
| 0                                   | 0 0                                              |                |                      |        |
| ENSG00000198455                     | 406.4484328                                      | 366.3879934    | 433.6093854          |        |
| 485.8692241                         | 648.3673584                                      | 538.2867643    | 402.1486039          |        |
| 557.5077823                         | -0.47144317                                      | 0.025221719    | 0.134111426          | ZXDB   |
| X                                   | 57591652                                         | 57597545       | + 5894               |        |
| protein_coding                      | zinc finger X-linked duplicated B [Source:HGNC   |                |                      |        |
| Symbol;Acc:HGNC:13199]              | zf-C2H2                                          | 448 414        | 373 469              | 568    |
| 624                                 | 3.722173099                                      | 3.328255439    | 3.937363826          |        |
| 4.421552182                         | 5.923597817                                      | 4.922723878    |                      |        |
| ENSG00000132801                     | 188.7082009                                      | 163.7241033    | 194.1361055          |        |
| 248.6324388                         | 262.5431205                                      | 315.7258906    | 182.1894699          |        |
| 275.6338166                         | -0.59930431                                      | 0.025224078    | 0.134111426          | ZSWIM3 |
| 20                                  | 45857617                                         | 45879122       | + 2773               |        |
| protein_coding                      | zinc finger SWIM-type containing 3 [Source:HGNC  |                |                      |        |

|                                     |                                            |             |             |                    |      |        |
|-------------------------------------|--------------------------------------------|-------------|-------------|--------------------|------|--------|
| Symbol;Acc:HGNC:16157]              | -                                          | 208         | 185         | 167                | 240  | 230    |
| 366                                 | 3.673179475                                | 3.16117326  |             | 3.74691161         |      |        |
| 4.809206393                         | 5.09829929                                 | 6.13708635  |             |                    |      |        |
| ENSG00000134070                     | 471.7705023                                | 506.2172276 |             | 834.6690046        |      |        |
| 381.2364061                         | 490.8414861                                | 343.33034   |             | 604.2189115        |      |        |
| 405.1360774                         | 0.576171856                                | 0.025266986 |             | 0.134299193        |      | IRAK2  |
| 3                                   | 10164865                                   | 10243743    |             | +                  | 3483 |        |
| protein_coding                      | interleukin 1 receptor associated kinase 2 |             |             |                    |      |        |
| [Source:HGNC Symbol;Acc:HGNC:6113]  | -                                          |             |             | 520                | 572  | 718    |
| 368                                 | 430                                        | 398         | 7.311029777 | 7.781601654        |      |        |
| 12.8256037                          | 5.870923046                                |             | 7.588611879 | 5.313254464        |      |        |
| ENSG00000123684                     | 3038.383485                                |             | 2677.995333 | 2853.917           |      |        |
| 2399.303034                         | 2219.060114                                |             | 2369.669457 | 2856.765273        |      |        |
| 2329.344202                         | 0.294311388                                |             | 0.025281028 | 0.134333463        |      | LPGAT1 |
| 1                                   | 211743457                                  |             | 211830772   | -                  | 8799 |        |
| protein_coding                      | lysophosphatidylglycerol acyltransferase 1 |             |             |                    |      |        |
| [Source:HGNC Symbol;Acc:HGNC:28985] | -                                          |             |             | 3349               | 3026 | 2455   |
| 2316                                | 1944                                       | 2747        | 18.63848092 | 16.29528824        |      |        |
| 17.35901288                         | 14.62572088                                |             | 13.58032937 | 14.5163142         |      |        |
| ENSG00000006534                     | 422.7789501                                |             | 361.0780225 | 463.8341683        |      |        |
| 393.6680281                         | 184.9216762                                |             | 206.1707318 | 415.897047         |      |        |
| 261.586812                          | 0.668528558                                |             | 0.025294472 | 0.134364537        |      |        |
| ALDH3B1 11                          | 68008578                                   |             | 68029282    | +                  | 6626 |        |
| protein_coding                      | aldehyde dehydrogenase 3 family member B1  |             |             |                    |      |        |
| [Source:HGNC Symbol;Acc:HGNC:410]   | -                                          | 466         | 408         | 399                | 380  | 162    |
| 239                                 | 3.444000205                                |             | 2.917663298 | 3.746522203        |      |        |
| 3.186722221                         | 1.502833762                                |             | 1.677171553 |                    |      |        |
| ENSG00000169981                     | 414.6136915                                |             | 410.637751  | 394.0846693        |      |        |
| 522.1281214                         | 650.6503421                                |             | 504.6438415 | 406.4453706        |      |        |
| 559.1407683                         | -0.458865484                               |             | 0.025319223 | 0.134455638        |      | ZNF35  |
| 3                                   | 44648727                                   |             | 44660791    | +                  | 2663 |        |
| protein_coding                      | zinc finger protein 35                     |             |             |                    |      |        |
| [Source:HGNC Symbol;Acc:HGNC:13099] | zf-C2H2                                    | 457         | 464         | 339                | 504  | 570    |
| 585                                 | 8.403761473                                |             | 8.256067879 | 7.920185956        |      |        |
| 10.51650454                         | 13.15682352                                |             | 10.21446719 |                    |      |        |
| ENSG00000174891                     | 1052.411121                                |             | 814.1955409 | 964.8680694        |      |        |
| 825.6668904                         | 599.2832098                                |             | 676.3090115 | 943.8249103        |      |        |
| 700.4197039                         | 0.42989782                                 |             | 0.025338071 | 0.134515348        |      | RSRC1  |
| 3                                   | 158105855                                  |             | 158545730   | +                  | 5117 |        |
| protein_coding                      | arginine and serine rich coiled-coil 1     |             |             |                    |      |        |
| [Source:HGNC Symbol;Acc:HGNC:24152] | -                                          | 1160        | 920         | 830                | 797  | 525    |
| 784                                 | 11.10123397                                |             | 8.519200729 | 10.09182061        |      |        |
| 8.654758383                         | 6.306541336                                |             | 7.124127179 |                    |      |        |
| ENSG00000261592                     | 1.814501932                                |             | 10.61994184 | 9.299933199        |      | 0      |
| 0                                   | 0                                          | 7.244792323 | 0           | 5.288706047        |      |        |
| 0.025347733                         | 1                                          | AC010531.3  | 16          | 87396704           |      |        |
| 87400295                            | -                                          | 513         | antisense   | "novel transcript, |      |        |
| antisense to MAP1LC3B"              | -                                          | 2           | 12          | 8                  | 0    | 0      |
| 0                                   | 0.190915555                                |             | 1.108384188 | 0.970240655        |      | 0      |
| 0                                   | 0                                          |             |             |                    |      |        |

|                                         |                                                      |             |                          |             |             |
|-----------------------------------------|------------------------------------------------------|-------------|--------------------------|-------------|-------------|
| ENSG00000136861                         | 1434.363777                                          | 1388.557395 | 1624.000835              |             |             |
| 1309.464178                             | 1189.434485                                          | 763.4355551 | 1482.307336              |             |             |
| 1087.444739                             | 0.447553031                                          | 0.02535911  | 0.134586646              |             |             |
| CDK5RAP2                                | 9                                                    | 120388869   | 120580170                | -           | 10080       |
| protein_coding                          | CDK5 regulatory subunit associated protein 2         |             |                          |             |             |
| [Source:HGNC Symbol;Acc:HGNC:18672]     | -                                                    |             | 1581                     | 1569        | 1397        |
| 1264                                    | 1042                                                 | 885         | 7.680686188              | 7.37545559  |             |
| 8.622688964                             | 6.967846673                                          | 6.354107339 | 4.082383093              |             |             |
| ENSG00000121940                         | 1087.793908                                          | 1031.019353 | 903.256012               |             |             |
| 812.1993                                | 829.8645591                                          | 652.1551182 | 1007.356425              |             |             |
| 764.7396591                             | 0.399035688                                          | 0.025397216 | 0.13471322               |             | CLCC1       |
| 1                                       | 108929508                                            | 108963457   | -                        | 4964        |             |
| protein_coding                          | chloride channel CLIC like 1 [Source:HGNC            |             |                          |             |             |
| Symbol;Acc:HGNC:29675]                  | -                                                    | 1199        | 1165                     | 777         | 784         |
| 756                                     | 11.82813013                                          | 11.12040472 | 9.738590233              |             | 727         |
| 8.77599432                              | 9.002227794                                          | 7.081431211 |                          |             |             |
| ENSG00000227036                         | 148.7891584                                          | 105.3144232 | 189.4861389              |             |             |
| 117.0644399                             | 54.79160775                                          | 54.34625985 | 147.8632402              |             |             |
| 75.40076918                             | 0.970637024                                          | 0.02539819  | 0.13471322               |             |             |
| LINC00511                               | 17                                                   | 72290091    | 72640472                 | -           | 27605       |
| processed_transcript                    | long intergenic non-protein coding RNA               |             |                          |             |             |
| 511 [Source:HGNC Symbol;Acc:HGNC:43564] | -                                                    |             | 164                      | 119         | 163         |
| 113                                     | 48                                                   | 63          | 0.290927503              | 0.204261093 |             |
| 0.367372547                             | 0.227458796                                          | 0.106881083 | 0.10611672               |             |             |
| ENSG00000128335                         | 202.3169654                                          | 307.0933181 | 275.510521               |             |             |
| 338.7616978                             | 438.332862                                           | 386.4622923 | 261.6402682              |             |             |
| 387.852284                              | -0.56790926                                          | 0.025420378 | 0.134790489              |             | APOL2       |
| 22                                      | 36226203                                             | 36239954    | -                        | 3484        |             |
| protein_coding                          | apolipoprotein L2 [Source:HGNC Symbol;Acc:HGNC:619]  |             |                          |             |             |
| -                                       | 223                                                  | 347         | 237                      | 327         | 384         |
| 3.134407085                             | 4.719301994                                          | 4.232305865 | 5.215328275              |             |             |
| 6.774861765                             | 5.97903211                                           |             |                          |             |             |
| ENSG00000248749                         | 11.79426256                                          | 0           | 13.9498998               | 0           | 0           |
| 0                                       | 8.581387452                                          | 0           | 5.531350452              | 0.025447752 |             |
| 0.13485785                              | AC104063.1                                           | 4           | 84371393                 |             |             |
| 84380189                                | -                                                    | 702         | lincRNA novel transcript |             | -           |
| 13                                      | 0                                                    | 12          | 0                        | 0           | 0.906848886 |
| 0                                       | 1.063533026                                          | 0           | 0                        | 0           |             |
| ENSG00000101343                         | 1102.309924                                          | 1037.214319 | 1070.65481               |             |             |
| 1344.687106                             | 1338.969914                                          | 1342.266354 | 1070.059684              |             |             |
| 1341.974458                             | -0.326696547                                         | 0.025452115 | 0.13485785               |             | CRNKL1      |
| 20                                      | 20034368                                             | 20056046    | -                        | 4567        |             |
| protein_coding                          | crooked neck pre-mRNA splicing factor 1 [Source:HGNC |             |                          |             |             |
| Symbol;Acc:HGNC:15762]                  | -                                                    | 1215        | 1172                     | 921         | 1298        |
| 1556                                    | 13.02788601                                          | 12.15970506 | 12.54687193              |             |             |
| 15.79267596                             | 15.78753625                                          | 15.84198505 |                          |             |             |
| ENSG00000176845                         | 633.2611743                                          | 700.0311661 | 1407.777388              |             |             |
| 513.8403735                             | 762.5165412                                          | 500.3306463 | 913.6899095              |             |             |
| 592.229187                              | 0.625024549                                          | 0.025455953 | 0.13485785               |             | METRNL      |
| 17                                      | 83079691                                             | 83095119    | +                        | 2626        |             |

|                      |                                                                                           |             |                        |                               |             |
|----------------------|-------------------------------------------------------------------------------------------|-------------|------------------------|-------------------------------|-------------|
| protein_coding       | "meteorin like, glial cell differentiation regulator [Source:HGNC Symbol;Acc:HGNC:27584]" | -           | 698                    | 791                           | 1211        |
|                      | 496                                                                                       | 668         | 580                    | 13.01635499                   | 14.27276787 |
| 28.69169913          | 10.49540008                                                                               | 15.63612382 | 10.26985448            |                               |             |
| ENSG00000164307      | 699.4904948                                                                               | 608.8766653 | 797.4692718            |                               |             |
| 559.4229872          | 553.6235367                                                                               | 414.0667417 | 701.9454773            |                               |             |
| 509.0377552          | 0.464008449                                                                               | 0.025490189 | 0.13499879             |                               | ERAP1       |
|                      | 5                                                                                         | 96760810    | 96808100               | -                             | 7945        |
| protein_coding       | endoplasmic reticulum aminopeptidase 1 [Source:HGNC Symbol;Acc:HGNC:18173]                | -           | 771                    | 688                           | 686         |
|                      | 480                                                                                       | 4.752139271 | 4.103183858            | 5.372013072                   | 540         |
| 3.776694901          | 3.752279643                                                                               | 2.809172149 |                        |                               | 485         |
| ENSG00000236801      | 65.32206955                                                                               | 54.86969949 | 63.93704074            |                               |             |
| 159.5391482          | 89.0363626                                                                                | 104.3793245 | 61.37626993            |                               |             |
| 117.6516118          | -0.939727904                                                                              | 0.025516361 | 0.135096949            |                               |             |
| RPL24P8              | 9                                                                                         | 70217195    | 70217668               | +                             | 474         |
| processed_pseudogene | ribosomal protein L24 pseudogene 8 [Source:HGNC Symbol;Acc:HGNC:36409]                    | -           | 72                     | 62                            | 55          |
|                      | 154                                                                                       | 78          | 121                    | 7.438456683                   | 6.197831838 |
| 7.219235254          | 18.05320953                                                                               | 10.11494723 | 11.86965365            |                               |             |
| ENSG00000242759      | 37.19728961                                                                               | 61.06466557 | 24.41232465            |                               |             |
| 101.5249125          | 66.20652603                                                                               | 104.3793245 | 40.89142661            |                               |             |
| 90.70358767          | -1.144206954                                                                              | 0.025537027 | 0.135165908            |                               |             |
| LINC00882            | 3                                                                                         | 106836811   | 107240641              | -                             | 3882        |
| lincRNA              | long intergenic non-protein coding RNA 882 [Source:HGNC Symbol;Acc:HGNC:48568]            | -           | 41                     | 69                            | 21          |
|                      | 98                                                                                        | 58          | 121                    | 0.517198205                   | 0.842209237 |
| 0.336566286          | 1.402757464                                                                               | 0.918374513 | 1.44930856             |                               |             |
| ENSG00000166682      | 22.68127415                                                                               | 3.539980612 | 0                      | 0                             | 0           |
|                      | 0                                                                                         | 8.740418254 | 0                      | 5.564518905                   | 0.025570776 |
|                      | 0.135304056                                                                               | TMPRSS5     | 11                     | 113687546                     | 113706373   |
|                      | -                                                                                         | 2666        | protein_coding         | transmembrane serine protease |             |
| 5                    | [Source:HGNC Symbol;Acc:HGNC:14908]                                                       | -           | 25                     | 4                             | 0           |
|                      | 0                                                                                         | 0           | 0                      | 0.45920705                    | 0.071092909 |
|                      | 0                                                                                         | 0           | 0                      |                               | 0           |
| ENSG00000146457      | 1592.225445                                                                               | 1592.10628  | 1613.53841             |                               |             |
| 1885.462661          | 1937.111632                                                                               | 2107.427188 | 1599.290045            |                               |             |
| 1976.66716           | -0.305936482                                                                              | 0.025587902 | 0.135354186            |                               | WTAP        |
|                      | 6                                                                                         | 159725585   | 159756319              | +                             | 6419        |
| protein_coding       | WT1 associated protein [Source:HGNC Symbol;Acc:HGNC:16846]                                | -           | 1755                   | 1799                          | 1388        |
|                      | 2443                                                                                      | 13.38870056 | 13.27976007            | 13.45330342                   | 1820        |
| 15.75491469          | 16.25031661                                                                               | 17.69648896 |                        |                               | 1697        |
| ENSG00000242296      | 0                                                                                         | 0           | 0                      | 0                             | 31.96177119 |
|                      | 0                                                                                         | 10.65392373 | -5.884819423           | 0.025608101                   | 0           |
| 0.135418577          | DEFB109A                                                                                  | 8           | 12393209               |                               | 12400366    |
|                      | -                                                                                         | 265         | unprocessed_pseudogene | defensin beta 109A            |             |
| (pseudogene)         | [Source:HGNC Symbol;Acc:HGNC:18090]                                                       | -           |                        |                               | 0           |
|                      | 0                                                                                         | 0           | 0                      | 28                            | 0           |
|                      | 0                                                                                         | 0           | 0                      | 0                             | 0           |
|                      | 0                                                                                         | 6.494706318 | 0                      |                               |             |

|                                     |                                                     |             |                         |              |      |      |
|-------------------------------------|-----------------------------------------------------|-------------|-------------------------|--------------|------|------|
| ENSG00000259776                     | 4.53625483                                          | 0           | 0                       | 15.53952742  |      |      |
| 26.25431205                         | 7.763751407                                         | 1.512084943 |                         |              |      |      |
| 16.51919696                         | -3.411542728                                        | 0.025615386 | 0.135418577             |              |      |      |
| AC093426.1                          | 1                                                   | 239247808   | 239250818               | -            | 3011 |      |
| lincRNA novel transcript            |                                                     |             | -                       | 5            | 0    | 0    |
| 15                                  | 23                                                  | 9           | 0.081318233             | 0            | 0    |      |
| 0.276816866                         | 0.469531183                                         | 0.138983349 |                         |              |      |      |
| ENSG00000266970                     | 0                                                   | 0           | 0                       | 14.83939377  |      |      |
| 10.35166854                         | 0                                                   | 8.39702077  | -5.545030644            | 0.025654579  |      |      |
| 0.135585253                         | AC061992.1                                          | 17          | 78360453                |              |      |      |
| 78373911                            | +                                                   | 1188        | lincRNA uncharacterized | LOC101928674 |      |      |
| [Source:NCBI gene;Acc:101928674]    |                                                     |             | -                       | 0            | 0    | 0    |
| 0                                   | 13                                                  | 12          | 0                       | 0            | 0    | 0    |
| 0.672626962                         | 0.469673247                                         |             |                         |              |      |      |
| ENSG00000143157                     | 2640.100311                                         | 2471.791463 | 2176.184369             |              |      |      |
| 2916.251313                         | 3095.725838                                         | 2979.555262 | 2429.358714             |              |      |      |
| 2997.177471                         | -0.302574191                                        | 0.025698652 | 0.135777613             | POGK         |      |      |
| 1                                   | 166839447                                           | 166856344   | +                       | 8448         |      |      |
| protein_coding                      | pogo transposable element derived with KRAB domain  |             |                         |              |      |      |
| [Source:HGNC Symbol;Acc:HGNC:18800] |                                                     | -           | 2910                    | 2793         | 1872 |      |
| 2815                                | 2712                                                | 3454        | 16.86816216             | 15.66547152  |      |      |
| 13.78665113                         | 18.51554661                                         | 19.73254674 | 19.01075856             |              |      |      |
| ENSG00000250497                     | 5.443505796                                         | 3.539980612 | 0                       | 4.14387398   |      |      |
| 43.37668947                         | 18.978059                                           | 2.994495469 | 22.16620748             |              |      |      |
| -2.855487372                        | 0.02571696                                          | 0.135833774 | AC007126.1              |              |      |      |
| 4                                   | 13777377                                            | 13782157    | -                       | 4781         |      |      |
| lincRNA novel transcript            |                                                     | -           | 6                       | 4            | 0    | 4    |
| 38                                  | 22                                                  | 0.061455561 | 0.039643107             | 0            |      |      |
| 0.04648933                          | 0.488553595                                         | 0.213961166 |                         |              |      |      |
| ENSG00000234616                     | 1078.721399                                         | 993.849557  | 852.1063794             |              |      |      |
| 1125.061785                         | 1295.593225                                         | 1378.497194 | 974.892445              |              |      |      |
| 1266.384068                         | -0.376868552                                        | 0.02572599  | 0.135840905             | JRK          |      |      |
| 8                                   | 142657460                                           | 142681968   | -                       | 11229        |      |      |
| protein_coding                      | Jrk helix-turn-helix protein [Source:HGNC           |             |                         |              |      |      |
| Symbol;Acc:HGNC:6199]               | -                                                   | 1189        | 1123                    | 733          | 1086 | 1135 |
| 1598                                | 5.185247089                                         | 4.738764379 | 4.061343656             |              |      |      |
| 5.374038669                         | 6.213011249                                         | 6.617084967 |                         |              |      |      |
| ENSG00000013619                     | 459.0689888                                         | 359.3080322 | 382.4597528             |              |      |      |
| 287.9992416                         | 324.1836792                                         | 168.2146138 | 400.2789246             |              |      |      |
| 260.1325115                         | 0.624783653                                         | 0.025753107 | 0.135943513             | MAMLD1       |      |      |
| X                                   | 150361422                                           | 150514178   | +                       | 5958         |      |      |
| protein_coding                      | mastermind like domain containing 1 [Source:HGNC    |             |                         |              |      |      |
| Symbol;Acc:HGNC:2568]               | -                                                   | 506         | 406                     | 329          | 278  | 284  |
| 195                                 | 4.158902141                                         | 3.228880525 | 3.435597244             |              |      |      |
| 2.592724316                         | 2.92998368                                          | 1.521826459 |                         |              |      |      |
| ENSG00000162430                     | 2161.071801                                         | 2031.063876 | 2211.059118             |              |      |      |
| 1793.261465                         | 1594.664084                                         | 1783.074907 | 2134.398265             |              |      |      |
| 1723.666818                         | 0.307900095                                         | 0.025763864 | 0.135951035             |              |      |      |
| SELENON 1                           | 25800176                                            | 25818224    | +                       | 4424         |      |      |
| protein_coding                      | selenoprotein N [Source:HGNC Symbol;Acc:HGNC:15999] |             |                         |              |      |      |

|                                         |                                                                                       |             |             |             |             |             |           |                          |
|-----------------------------------------|---------------------------------------------------------------------------------------|-------------|-------------|-------------|-------------|-------------|-----------|--------------------------|
| -                                       | 2382                                                                                  | 2295        | 1902        | 1731        | 1397        | 2067        |           |                          |
| 26.36667235                             | 24.58068676                                                                           |             | 26.74867296 |             | 21.74172475 |             |           |                          |
| 19.41013911                             | 21.72482949                                                                           |             |             |             |             |             |           |                          |
| ENSG00000173209                         | 333.8683555                                                                           |             | 307.9783133 |             | 184.8361723 |             |           |                          |
| 158.5031797                             | 179.214217                                                                            |             | 181.1541995 |             | 275.560947  |             |           |                          |
| 172.9571988                             | 0.6740864                                                                             |             | 0.025769903 |             | 0.135951035 |             | AHSA2P    |                          |
| 2                                       | 61177418                                                                              |             | 61191203    |             | +           | 9083        |           |                          |
| transcribed_unitary_pseudogene          | "activator of HSP90 ATPase homolog 2, pseudogene [Source:HGNC Symbol;Acc:HGNC:20437]" |             |             |             |             |             | -         | 368 348                  |
| 159                                     | 153                                                                                   | 157         | 210         | 1.984025218 |             | 1.815416886 |           |                          |
| 1.0891173                               |                                                                                       | 0.935996361 | 1.062472501 |             |             | 1.075031027 |           |                          |
| ENSG00000131196                         | 245.8650118                                                                           |             | 144.25421   |             | 256.9106546 |             |           |                          |
| 162.6470537                             | 106.15874                                                                             |             | 108.6925197 |             | 215.6766255 |             |           |                          |
| 125.8327711                             | 0.776228399                                                                           |             | 0.025812751 |             | 0.13611101  |             | NFATC1    |                          |
| 18                                      | 79395856                                                                              |             | 79529325    |             | +           | 9068        |           |                          |
| protein_coding                          | nuclear factor of activated T cells 1 [Source:HGNC Symbol;Acc:HGNC:7775]              |             |             |             |             |             | RHD       | 271 163 221 157 93       |
| 126                                     | 1.463478892                                                                           |             | 0.851731156 |             | 1.516308637 |             |           |                          |
| 0.962055628                             | 0.630403764                                                                           |             | 0.646085585 |             |             |             |           |                          |
| ENSG00000033178                         | 1936.980812                                                                           |             | 1385.017415 |             | 1634.46326  |             |           |                          |
| 1263.881564                             | 1378.922128                                                                           |             | 1180.090214 |             | 1652.153829 |             |           |                          |
| 1274.297969                             | 0.375028128                                                                           |             | 0.02582191  |             | 0.13611101  |             | UBA6      |                          |
| 4                                       | 67612652                                                                              |             | 67701179    |             | -           | 11432       |           |                          |
| protein_coding                          | ubiquitin like modifier activating enzyme 6 [Source:HGNC Symbol;Acc:HGNC:25581]       |             |             |             |             |             | -         | 2135 1565 1406           |
| 1220                                    | 1208                                                                                  | 1368        | 9.145434573 |             | 6.486621645 |             |           |                          |
| 7.65191173                              | 5.929931253                                                                           |             | 6.495193274 |             | 5.564099655 |             |           |                          |
| ENSG00000106400                         | 1316.421152                                                                           |             | 1672.640839 |             | 1603.075985 |             |           |                          |
| 1749.750788                             | 1880.037041                                                                           |             | 2294.61986  |             | 1530.712659 |             |           |                          |
| 1974.802563                             | -0.368076216                                                                          |             | 0.025827821 |             | 0.13611101  |             | ZNHIT1    |                          |
| 7                                       | 101217668                                                                             |             | 101224190   |             | +           | 5510        |           |                          |
| protein_coding                          | zinc finger HIT-type containing 1 [Source:HGNC Symbol;Acc:HGNC:21688]                 |             |             |             |             |             | -         | 1451 1890 1379 1689 1647 |
| 2660                                    | 12.8956874                                                                            |             | 16.25311642 |             | 15.57110789 |             |           |                          |
| 17.03295874                             | 18.37339283                                                                           |             | 22.4471421  |             |             |             |           |                          |
| ENSG00000102921                         | 537.9998228                                                                           |             | 560.2019319 |             | 585.8957915 |             |           |                          |
| 766.6166862                             | 667.7727195                                                                           |             | 790.1773655 |             | 561.3658488 |             |           |                          |
| 741.5222571                             | -0.402558313                                                                          |             | 0.025831006 |             | 0.13611101  |             | N4BP1     |                          |
| 16                                      | 48538726                                                                              |             | 48620148    |             | -           | 7839        |           |                          |
| protein_coding                          | NEDD4 binding protein 1 [Source:HGNC Symbol;Acc:HGNC:29850]                           |             |             |             |             |             | -         | 593 633 504 740 585      |
| 916                                     | 3.704441258                                                                           |             | 3.826216026 |             | 4.000154067 |             |           |                          |
| 5.245454194                             | 4.587145987                                                                           |             | 5.433326799 |             |             |             |           |                          |
| ENSG00000267565                         | 4.53625483                                                                            |             | 19.46989337 |             | 17.43737475 |             |           |                          |
| 3.107905485                             | 0                                                                                     | 0           | 13.81450765 |             | 1.035968495 |             |           |                          |
| 3.751442672                             | 0.025872101                                                                           |             | 0.136286953 |             | AC011477.3  |             | 19        |                          |
| 19892433                                |                                                                                       | 19895847    |             | -           | 403         |             | antisense |                          |
| "novel transcript, antisense to ZNF253" |                                                                                       |             |             | -           | 5           |             | 22        |                          |
| 15                                      | 3                                                                                     | 0           | 0           | 0.607566251 |             | 2.586688162 |           |                          |
| 2.315757395                             |                                                                                       | 0.413645451 |             | 0           |             |             |           |                          |



|                                     |                                                 |             |                                     |             |       |
|-------------------------------------|-------------------------------------------------|-------------|-------------------------------------|-------------|-------|
| ENSG00000267321                     | 200.5024635                                     | 166.3790888 | 155.7738811                         |             |       |
| 93.23716454                         | 114.1491828                                     | 107.8298807 | 174.2184778                         |             |       |
| 105.072076                          | 0.730709372                                     | 0.025880213 | 0.136289098                         |             |       |
| LINC02001                           | 17                                              | 35568109    | 35574843                            | +           | 1504  |
| lincRNA                             | long intergenic non-protein coding RNA 2001     |             |                                     |             |       |
| [Source:HGNC Symbol;Acc:HGNC:52836] | -                                               | 221         | 188                                 |             | 134   |
| 90                                  | 100                                             | 125         | 7.195701199                         | 5.922928007 |       |
| 5.543241615                         | 3.325115358                                     | 4.086951876 | 3.864498961                         |             |       |
| ENSG00000254635                     | 387.3961625                                     | 331.8731824 | 288.2979292                         |             |       |
| 361.5530047                         | 530.7937001                                     | 584.8692727 | 335.855758                          |             |       |
| 492.4053258                         | -0.551410495                                    | 0.025894034 | 0.136321297                         |             | WAC-  |
| AS1                                 | 10                                              | 28522652    | 28532743                            | -           | 2943  |
| antisense                           | WAC antisense RNA 1 (head to head) [Source:HGNC |             |                                     |             |       |
| Symbol;Acc:HGNC:27347]              | -                                               | 427         | 375                                 | 248         | 349   |
| 678                                 | 7.105036224                                     | 6.037643228 | 5.242860053                         |             | 465   |
| 6.589420285                         | 9.712030799                                     | 10.71199719 |                                     |             |       |
| ENSG00000251191                     | 5.443505796                                     | 0.884995153 | 16.2748831                          |             | 0     |
| 0                                   | 0                                               | 7.534461349 | 0                                   | 5.340287413 |       |
| 0.025937662                         | 1                                               | LINC00589   | 8                                   | 29673922    |       |
| 29748109                            | -                                               | 2074        | lincRNA long intergenic non-protein |             |       |
| coding RNA 589                      | [Source:HGNC Symbol;Acc:HGNC:32299]             |             |                                     |             | -     |
| 1                                   | 14                                              | 0           | 0                                   | 0.141667811 | 6     |
| 0.022846395                         | 0.419977603                                     | 0           | 0                                   | 0           |       |
| ENSG00000198590                     | 5.443505796                                     | 4.424975766 | 3.48747495                          |             |       |
| 7.251779464                         | 29.67878753                                     | 31.91764468 | 4.451985504                         |             |       |
| 22.94940389                         | -2.360597648                                    | 0.025962425 | 0.136625691                         |             |       |
| C3orf35                             | 3                                               | 37386269    | 37435497                            | +           | 3072  |
| processed_transcript                | chromosome 3 open reading frame 35              |             |                                     |             |       |
| [Source:HGNC Symbol;Acc:HGNC:24082] | -                                               | 6           | 5                                   |             | 3     |
| 7                                   | 26                                              | 37          | 0.095644218                         | 0.077121458 |       |
| 0.060758479                         | 0.126616082                                     | 0.520234916 | 0.560030308                         |             |       |
| ENSG00000130695                     | 1091.422912                                     | 953.1397799 | 918.3684034                         |             |       |
| 676.4874272                         | 886.9391505                                     | 665.0947039 | 987.6436985                         |             |       |
| 742.8404272                         | 0.412280666                                     | 0.0259673   | 0.136625691                         |             | CEP85 |
| 1                                   | 26234200                                        | 26278808    | +                                   | 5145        |       |
| protein_coding                      | centrosomal protein 85 [Source:HGNC             |             |                                     |             |       |
| Symbol;Acc:HGNC:25309]              | -                                               | 1203        | 1077                                | 790         | 653   |
| 771                                 | 11.45009083                                     | 9.91874591  | 9.553193155                         |             | 777   |
| 7.05244724                          | 9.282885633                                     | 6.967869642 |                                     |             |       |
| ENSG00000160298                     | 423.6862011                                     | 440.7275863 | 398.7346359                         |             |       |
| 217.5533839                         | 175.7897415                                     | 34.50556181 | 421.0494744                         |             |       |
| 142.6162291                         | 1.563368984                                     | 0.026053583 | 0.137011539                         |             |       |
| C21orf58                            | 21                                              | 46300181    | 46323875                            | -           | 5315  |
| protein_coding                      | chromosome 21 open reading frame 58             |             |                                     |             |       |
| [Source:HGNC Symbol;Acc:HGNC:1300]  | -                                               | 467         | 498                                 |             | 343   |
| 210                                 | 154                                             | 40          | 4.302712173                         | 4.439688651 |       |
| 4.01511231                          | 2.195472843                                     | 1.781003661 | 0.349935289                         |             |       |
| ENSG00000137700                     | 861.8884177                                     | 867.2952501 | 732.3697394                         |             |       |
| 634.0127189                         | 582.1608324                                     | 655.6056744 | 820.5178024                         |             |       |
| 623.9264086                         | 0.39536817                                      | 0.026057479 | 0.137011539                         |             |       |

|                                    |             |                                         |             |             |             |                          |
|------------------------------------|-------------|-----------------------------------------|-------------|-------------|-------------|--------------------------|
| SLC37A4                            | 11          | 119024114                               | 119030906   | -           | 6186        |                          |
| protein_coding                     |             | solute carrier family 37 member 4       |             |             |             | [Source:HGNC             |
| Symbol;Acc:HGNC:4061]              |             | -                                       | 950 980     | 630 612     | 510         |                          |
|                                    | 760         | 7.520424804                             | 7.506588357 | 6.336325519 |             |                          |
| 5.497352051                        |             | 5.067661764                             | 5.712611565 |             |             |                          |
| ENSG00000171497                    |             | 780.2358307                             | 814.1955409 | 759.1070474 |             |                          |
| 644.3724038                        |             | 521.6617655                             | 615.9242783 | 784.5128063 |             |                          |
| 593.9861492                        |             | 0.400950846                             | 0.026063872 | 0.137011539 |             | PPID                     |
|                                    | 4           | 158709134                               | 158723396   | -           | 2509        |                          |
| protein_coding                     |             | peptidylprolyl isomerase D              |             |             |             | [Source:HGNC             |
| Symbol;Acc:HGNC:9257]              |             | -                                       | 860 920     | 653 622     | 457         |                          |
|                                    | 714         | 16.78519819                             | 17.37455167 | 16.19270361 |             |                          |
| 13.77532224                        |             | 11.19600024                             | 13.23209373 |             |             |                          |
| ENSG00000122257                    |             | 1486.077082                             | 1122.173854 | 1177.604041 |             |                          |
| 1144.745187                        |             | 827.5815754                             | 854.8752939 | 1261.951659 |             |                          |
| 942.4006854                        |             | 0.421525832                             | 0.026113844 | 0.137233446 |             | RBBP6                    |
|                                    | 16          | 24537693                                | 24572863    | +           | 10475       |                          |
| protein_coding                     |             | "RB binding protein 6, ubiquitin ligase |             |             |             | [Source:HGNC             |
| Symbol;Acc:HGNC:9889]"             |             | -                                       | 1638 1268   | 1013 1105   | 725         |                          |
|                                    | 991         | 7.657527221                             | 5.735769136 | 6.016754069 |             |                          |
| 5.861655492                        |             | 4.254331576                             | 4.398966361 |             |             |                          |
| ENSG00000279530                    |             | 4.53625483                              | 13.2749273  | 3.48747495  |             | 0                        |
|                                    | 0           | 0                                       | 7.099552359 | 0           | 5.264044883 |                          |
| 0.026131524                        |             | 1                                       | AC092881.1  | 12          | 70321542    |                          |
| 70324274                           |             | -                                       | 2733        | TEC         | TEC         | -                        |
|                                    | 3           | 0                                       | 0           | 0           | 0.089589901 | 5 15                     |
|                                    | 0.068294931 | 0                                       | 0           | 0           | 0.260062701 |                          |
| ENSG00000174353                    |             | 79.83808501                             | 49.55972857 | 31.38727455 |             |                          |
| 32.11502334                        |             | 11.41491828                             | 10.35166854 | 53.59502938 |             |                          |
| 17.96053672                        |             | 1.582544193                             | 0.026139443 | 0.137327179 |             |                          |
| STAG3L3                            | 7           | 72969696                                | 73005922    | -           | 3644        |                          |
| transcribed_unprocessed_pseudogene |             |                                         |             |             |             | stromal antigen 3-like 3 |
| (pseudogene) [Source:HGNC          |             |                                         |             |             |             | Symbol;Acc:HGNC:33845]   |
|                                    | 56          | 27                                      | 31          | 10          | 12          | 1.182586692              |
| 0.728175562                        |             | 0.460990783                             | 0.472710631 | 0.168682097 |             |                          |
| 0.153120696                        |             |                                         |             |             |             |                          |
| ENSG00000198040                    |             | 778.4213288                             | 715.9610789 | 582.4083166 |             |                          |
| 1168.572462                        |             | 749.9601311                             | 941.1391984 | 692.2635748 |             |                          |
| 953.2239306                        |             | -0.460908775                            | 0.026152257 | 0.137353704 |             | ZNF84                    |
|                                    | 12          | 133037292                               | 133063304   | +           | 9520        |                          |
| protein_coding                     |             | zinc finger protein 84                  |             |             |             | [Source:HGNC             |
| Symbol;Acc:HGNC:13159]             |             | zf-C2H2                                 | 858 809     | 501 1128    | 657         |                          |
|                                    | 1091        | 4.413458254                             | 4.026595595 | 3.274218244 |             |                          |
| 6.58391469                         |             | 4.242049983                             | 5.328669936 |             |             |                          |
| ENSG00000159322                    |             | 921.7669814                             | 991.1945715 | 1006.717769 |             |                          |
| 690.9909861                        |             | 809.3177062                             | 759.9849989 | 973.2264406 |             |                          |
| 753.4312304                        |             | 0.369289228                             | 0.026177514 | 0.137445547 |             | ADPGK                    |
|                                    | 15          | 72751369                                | 72785846    | -           | 5931        |                          |
| protein_coding                     |             | ADP dependent glucokinase               |             |             |             | [Source:HGNC             |
| Symbol;Acc:HGNC:25250]             |             | -                                       | 1016 1120   | 866 667     | 709         |                          |

|                                                  |                                                   |              |                |        |
|--------------------------------------------------|---------------------------------------------------|--------------|----------------|--------|
| 881                                              | 8.388696218                                       | 8.947805588  | 9.084411839    |        |
| 6.248991782                                      | 7.347941184                                       | 6.90683375   |                |        |
| ENSG00000150768                                  | 2220.950365                                       | 1987.699114  | 2285.458584    |        |
| 1783.937748                                      | 1845.792286                                       | 1573.453619  | 2164.702687    |        |
| 1734.394551                                      | 0.319920855                                       | 0.026201732  | 0.137509093    | DLAT   |
| 11                                               | 112024814                                         | 112064390    | + 4831         |        |
| protein_coding                                   | dihydrolipoamide S-acetyltransferase [Source:HGNC |              |                |        |
| Symbol;Acc:HGNC:2896]                            | -                                                 | 2448 2246    | 1966 1722      | 1617   |
| 1824                                             | 24.81435891                                       | 22.02922178  | 25.31939491    |        |
| 19.80651893                                      | 20.57407613                                       | 17.55572683  |                |        |
| ENSG00000103047                                  | 690.4179851                                       | 620.3816023  | 719.5823313    |        |
| 754.1850643                                      | 1036.47458                                        | 915.260027   | 676.7939729    |        |
| 901.9732238                                      | -0.414593094                                      | 0.026211414  | 0.137509093    | TANG06 |
| 16                                               | 68843604                                          | 69085180     | + 6839         |        |
| protein_coding                                   | transport and golgi organization 6 homolog        |              |                |        |
| [Source:HGNC Symbol;Acc:HGNC:25749]              | -                                                 | 761          | 701            | 619    |
| 728                                              | 908 1061                                          | 5.449049293  | 4.856818287    |        |
| 5.631251084                                      | 5.914946478                                       | 8.160947894  | 7.213628928    |        |
| ENSG00000150636                                  | 208.6677222                                       | 114.1643748  | 117.4116566    |        |
| 70.44585765                                      | 83.32890346                                       | 86.26390453  | 146.7479179    |        |
| 80.01288855                                      | 0.875915282                                       | 0.026214172  | 0.137509093    |        |
| CCDC102B                                         | 18 68715209                                       | 69055189     | + 5805         |        |
| protein_coding                                   | coiled-coil domain containing 102B                |              |                |        |
| [Source:HGNC Symbol;Acc:HGNC:26295]              | -                                                 | 230          | 129            | 101    |
| 68                                               | 73 100                                            | 1.940234825  | 1.052964979    |        |
| 1.082495242                                      | 0.650906686                                       | 0.772979536  | 0.800993135    |        |
| ENSG00000251127                                  | 32.66103478                                       | 53.98470434  | 26.73730795    |        |
| 137.7838098                                      | 63.92354238                                       | 61.24737221  | 37.79434902    |        |
| 87.6515748                                       | -1.208158226                                      | 0.026220712  | 0.137509093    |        |
| AC091173.1                                       | 8 61759094                                        | 61765969     | - 2750         |        |
| lincRNA                                          | novel transcript                                  | -            | 36 61          | 23     |
| 133                                              | 56 71                                             | 0.641059721  | 1.051050497    |        |
| 0.520357704                                      | 2.687391819                                       | 1.251707036  | 1.200484821    |        |
| ENSG00000129910                                  | 11.79426256                                       | 15.0449176   | 30.2247829     |        |
| 6.215810969                                      | 0 0                                               | 19.02132102  | 2.07193699     |        |
| 3.206211005                                      | 0.026302681                                       | 0.13789808   | CDH15 16       |        |
| 89171767                                         | 89195492                                          | + 4628       | protein_coding |        |
| cadherin 15 [Source:HGNC Symbol;Acc:HGNC:1754]   | -                                                 | 13           | 17             |        |
| 26                                               | 6 0                                               | 0 0.13755573 | 0.1740532      |        |
| 0.349531921                                      | 0.072039376                                       | 0            | 0              |        |
| ENSG00000189046                                  | 415.5209424                                       | 556.6619513  | 519.6337675    |        |
| 475.5095392                                      | 800.1857715                                       | 904.0457194  | 497.2722204    |        |
| 726.5803434                                      | -0.547762926                                      | 0.026313535  | 0.137914112    | ALKBH2 |
| 12                                               | 109088188                                         | 109093631    | - 2290         |        |
| protein_coding                                   | "alkB homolog 2, alpha-ketoglutarate dependent    |              |                |        |
| dioxygenase [Source:HGNC Symbol;Acc:HGNC:32487]" | -                                                 |              |                | 458    |
| 629                                              | 447 459                                           | 701 1048     | 9.793967966    |        |
| 13.01492303                                      | 12.14447898                                       | 11.13753923  | 18.81611228    |        |
| 21.27927457                                      |                                                   |              |                |        |
| ENSG00000047056                                  | 635.9829272                                       | 676.136297   | 483.5965264    |        |

|                             |                                                      |                |                         |                         |
|-----------------------------|------------------------------------------------------|----------------|-------------------------|-------------------------|
| 894.0408111                 | 760.2335576                                          | 775.5125017    | 598.5719168             |                         |
| 809.9289568                 | -0.43475991                                          | 0.026336642    | 0.137994331             | WDR37                   |
| 10                          | 1049538                                              | 1132384 +      | 6000                    | protein_coding WD       |
| repeat domain 37            | [Source:HGNC Symbol;Acc:HGNC:31406]                  |                |                         | - 701                   |
| 764                         | 416                                                  | 863            | 666                     | 899                     |
| 5.72130962                  |                                                      |                |                         |                         |
| 6.03348933                  | 4.313689952                                          | 7.992296535    | 6.82292094              |                         |
| 6.966898116                 |                                                      |                |                         |                         |
| ENSG00000204536             | 1201.200279                                          | 1316.872788    | 1136.916834             |                         |
| 873.3214412                 | 1101.539614                                          | 826.4082054    | 1218.329967             |                         |
| 933.7564203                 | 0.385049684                                          | 0.026401107    | 0.138291142             | CCHCR1                  |
| 6                           | 31142439                                             | 31158238       | -                       | 5086                    |
| protein_coding              | coiled-coil alpha-helical rod protein 1 [Source:HGNC |                |                         |                         |
| Symbol;Acc:HGNC:13930]      | -                                                    | 1324           | 1488                    | 978 843 965             |
| 958                         | 12.74794887                                          | 13.86286571    | 11.96380554             |                         |
| 9.210077028                 | 11.66267887                                          | 8.758307144    |                         |                         |
| ENSG00000114416             | 3906.62266                                           | 3555.02553     | 3936.196727             |                         |
| 3472.566395                 | 2963.312786                                          | 2782.87356     | 3799.281639             |                         |
| 3072.91758                  | 0.306163306                                          | 0.026503995    | 0.138788975             | FXR1                    |
| 3                           | 180868141                                            | 180982753      | +                       | 12054                   |
| protein_coding              | FMR1 autosomal homolog 1 [Source:HGNC                |                |                         |                         |
| Symbol;Acc:HGNC:4023]       | -                                                    | 4306           | 4017                    | 3386 3352 2596          |
| 3226                        | 17.49329105                                          | 15.79054376    | 17.47682805             |                         |
| 15.45200594                 | 13.2379538                                           | 12.4441201     |                         |                         |
| ENSG00000139618             | 2037.68567                                           | 1352.272594    | 1343.840347             |                         |
| 1530.125467                 | 763.658033                                           | 984.2711507    | 1577.93287              |                         |
| 1092.684884                 | 0.530261614                                          | 0.026527586    | 0.138871403             | BRCA2                   |
| 13                          | 32315474                                             | 32400266       | +                       | 12273                   |
| protein_coding              | "BRCA2, DNA repair associated [Source:HGNC           |                |                         |                         |
| Symbol;Acc:HGNC:1101]"      | -                                                    | 2246           | 1528                    | 1156 1477 669           |
| 1141                        | 8.961644281                                          | 5.899280694    | 5.860220353             |                         |
| 6.68716139                  | 3.350601231                                          | 4.322807819    |                         |                         |
| ENSG00000124783             | 7206.294423                                          | 6103.811571    | 6609.927521             |                         |
| 6321.479756                 | 4793.124186                                          | 4782.470867    | 6640.011172             |                         |
| 5299.024936                 | 0.325495646                                          | 0.026642536    | 0.139431898             | SSR1                    |
| 6                           | 7268306                                              | 7347446 -      | 11349                   | protein_coding signal   |
| sequence receptor subunit 1 | [Source:HGNC Symbol;Acc:HGNC:11323]                  |                |                         | -                       |
| 7943                        | 6897                                                 | 5686           | 6102                    | 4199 5544 34.27327851   |
| 28.79579485                 | 31.17138549                                          | 29.87628894    | 22.7423657              |                         |
| 22.71415807                 |                                                      |                |                         |                         |
| ENSG00000268182             | 7.258007728                                          | 5.309970919    | 8.137441549             | 0                       |
| 0                           | 0                                                    | 6.901806732    | 0                       | 5.218905881             |
| 0.026678402                 | 1                                                    | SMIM17         | 19                      | 56643145 56655766       |
| +                           | 1076                                                 | protein_coding | small integral membrane |                         |
| protein 17                  | [Source:HGNC Symbol;Acc:HGNC:27114]                  |                |                         | - 8 6                   |
| 7                           | 0                                                    | 0              | 0                       | 0.364088028 0.264219837 |
| 0.404755366                 | 0                                                    | 0              | 0                       |                         |
| ENSG00000160392             | 890.0131976                                          | 1060.224193    | 868.3812625             |                         |
| 1029.752684                 | 1265.914437                                          | 1414.728034    | 939.5395512             |                         |
| 1236.798385                 | -0.396478763                                         | 0.026711732    | 0.139734855             |                         |
| C19orf47                    | 19                                                   | 40319536       | 40348527                | - 4875                  |

|                                               |                                                  |             |                |             |      |      |
|-----------------------------------------------|--------------------------------------------------|-------------|----------------|-------------|------|------|
| protein_coding                                | chromosome 19 open reading frame 47              |             |                |             |      |      |
| [Source:HGNC Symbol;Acc:HGNC:26723]           | -                                                | 981         | 1198           | 747         |      |      |
| 994                                           | 1109                                             | 1640        | 9.854238538    | 11.64417272 |      |      |
| 9.533510043                                   | 11.32984081                                      | 13.98312649 | 15.64228686    |             |      |      |
| ENSG00000151176                               | 1123.176696                                      | 938.0948623 | 1110.179526    |             |      |      |
| 857.7819138                                   | 833.2890346                                      | 762.572916  | 1057.150361    |             |      |      |
| 817.8812881                                   | 0.370268888                                      | 0.026716224 | 0.139734855    | PLBD2       |      |      |
| 12                                            | 113358566                                        | 113391625   | + 5260         |             |      |      |
| protein_coding                                | phospholipase B domain containing 2 [Source:HGNC |             |                |             |      |      |
| Symbol;Acc:HGNC:27283]                        | -                                                | 1238        | 1060           | 955         | 828  | 730  |
| 884                                           | 11.52560109                                      | 9.548750855 | 11.29599455    |             |      |      |
| 8.746949845                                   | 8.530696205                                      | 7.814434206 |                |             |      |      |
| ENSG00000166887                               | 1389.90848                                       | 1395.637356 | 1355.465264    |             |      |      |
| 1751.822725                                   | 1610.64497                                       | 1774.448516 | 1380.337033    |             |      |      |
| 1712.305404                                   | -0.311050853                                     | 0.02673793  | 0.139807046    | VPS39       |      |      |
| 15                                            | 42158701                                         | 42208316    | - 8354         |             |      |      |
| protein_coding                                | "VPS39, HOPS complex subunit [Source:HGNC        |             |                |             |      |      |
| Symbol;Acc:HGNC:20593]"                       | -                                                | 1532        | 1577           | 1166        | 1691 | 1411 |
| 2057                                          | 8.980344101                                      | 8.94465642  | 8.683822267    |             |      |      |
| 11.24763411                                   | 10.38197319                                      | 11.44908656 |                |             |      |      |
| ENSG00000187446                               | 1225.696055                                      | 806.2305845 | 1061.354876    |             |      |      |
| 888.8609686                                   | 715.7153763                                      | 659.0562306 | 1031.093839    |             |      |      |
| 754.5441918                                   | 0.450657557                                      | 0.026785921 | 0.139989861    | CHP1        |      |      |
| 15                                            | 41230839                                         | 41281890    | + 3950         |             |      |      |
| protein_coding                                | calcineurin like EF-hand protein 1 [Source:HGNC  |             |                |             |      |      |
| Symbol;Acc:HGNC:17433]                        | -                                                | 1351        | 911            | 913         | 858  | 627  |
| 764                                           | 16.74892497                                      | 10.92817704 | 14.38071663    |             |      |      |
| 12.06986009                                   | 9.757033709                                      | 8.993469809 |                |             |      |      |
| ENSG00000162814                               | 93.4468495                                       | 133.6342681 | 97.64929859    |             |      |      |
| 145.0355893                                   | 167.7992987                                      | 244.9894889 | 108.2434721    |             |      |      |
| 185.941459                                    | -0.781041849                                     | 0.026790072 | 0.139989861    |             |      |      |
| SPATA17 1                                     | 217631324                                        | 217871696   | + 6515         |             |      |      |
| protein_coding                                | spermatogenesis associated 17 [Source:HGNC       |             |                |             |      |      |
| Symbol;Acc:HGNC:25184]                        | -                                                | 103         | 151            | 84          | 140  | 147  |
| 284                                           | 0.774197007                                      | 1.098219038 | 0.802179783    |             |      |      |
| 1.194058651                                   | 1.386916372                                      | 2.026912207 |                |             |      |      |
| ENSG00000171812                               | 36.29003864                                      | 17.69990306 | 47.66215765    |             |      |      |
| 8.287747959                                   | 0                                                | 12.93958568 | 33.88403312    | 7.075777879 |      |      |
| 2.236266121                                   | 0.026796635                                      | 0.139989861 | COL8A2 1       |             |      |      |
| 36095236                                      | 36125220                                         | - 4670      | protein_coding |             |      |      |
| collagen type VIII alpha 2 chain [Source:HGNC |                                                  |             |                |             |      |      |
| Symbol;Acc:HGNC:2216]                         | -                                                | 40          | 20             | 41          | 8    | 0    |
| 15                                            | 0.419441883                                      | 0.20292687  | 0.546227829    |             |      |      |
| 0.095188646                                   | 0                                                | 0.149350058 |                |             |      |      |
| ENSG00000157077                               | 814.7113674                                      | 653.126423  | 678.8951235    |             |      |      |
| 905.4364645                                   | 888.0806423                                      | 1023.089908 | 715.577638     |             |      |      |
| 938.8690049                                   | -0.391975669                                     | 0.026828649 | 0.140096684    | ZFYVE9      |      |      |
| 1                                             | 52142094                                         | 52346686    | + 5809         |             |      |      |
| protein_coding                                | zinc finger FYVE-type containing 9 [Source:HGNC  |             |                |             |      |      |
| Symbol;Acc:HGNC:6775]                         | -                                                | 898         | 738            | 584         | 874  | 778  |

|                                  |                                                                          |             |             |                |
|----------------------------------|--------------------------------------------------------------------------|-------------|-------------|----------------|
| 1186                             | 7.570135336                                                              | 6.019791178 | 6.254870424 |                |
| 8.36030458                       | 8.232383257                                                              | 9.493237163 |             |                |
| ENSG00000149527                  | 53.52780699                                                              | 26.54985459 | 30.2247829  |                |
| 66.30198367                      | 113.007691                                                               | 69.01112362 | 36.76748149 |                |
| 82.77359943                      | -1.166286945                                                             | 0.026832922 | 0.140096684 | PLCH2          |
| 1                                | 2425980                                                                  | 2505530 +   | 10781       | protein_coding |
| phospholipase C eta 2            | [Source:HGNC Symbol;Acc:HGNC:29037]                                      |             |             | -              |
| 59                               | 30                                                                       | 26          | 64          | 99             |
| 0.131852585                      | 0.150044869                                                              | 0.329862519 | 0.564447441 |                |
| 0.345034052                      |                                                                          |             |             |                |
| ENSG00000136630                  | 129.7368881                                                              | 163.7241033 | 237.1482966 |                |
| 174.0427071                      | 369.8433523                                                              | 355.4072867 | 176.8697627 |                |
| 299.7644487                      | -0.764052587                                                             | 0.026851699 | 0.140153352 | HLX            |
| 1                                | 220879400                                                                | 220885059   | + 5660      |                |
| protein_coding                   | H2.0 like homeobox [Source:HGNC Symbol;Acc:HGNC:4978]                    |             |             |                |
| Homeobox                         | 143                                                                      | 185         | 204         | 168            |
| 1.237223869                      | 1.548751493                                                              | 2.242438715 | 1.649319882 |                |
| 3.518648943                      | 3.384634703                                                              |             |             |                |
| ENSG00000063854                  | 311.1870813                                                              | 331.8731824 | 409.1970608 |                |
| 235.1648483                      | 231.7228411                                                              | 256.2037964 | 350.7524415 |                |
| 241.0304953                      | 0.539128516                                                              | 0.026898621 | 0.140356847 | HAGH           |
| 16                               | 1795620                                                                  | 1827194 -   | 5975        | protein_coding |
| hydroxyacylglutathione hydrolase | [Source:HGNC Symbol;Acc:HGNC:4805]                                       |             |             |                |
| -                                | 343                                                                      | 375         | 352         | 227            |
| 2.811155659                      | 2.973855066                                                              | 3.665317501 | 2.111057153 |                |
| 2.088360588                      | 2.311264016                                                              |             |             |                |
| ENSG00000134138                  | 350.1988729                                                              | 276.1184878 | 381.2972612 |                |
| 276.6035881                      | 194.0536108                                                              | 194.9564242 | 335.8715406 |                |
| 221.8712077                      | 0.597457709                                                              | 0.0269165   | 0.140408721 | MEIS2          |
| 15                               | 36889204                                                                 | 37101299    | - 10798     |                |
| protein_coding                   | Meis homeobox 2 [Source:HGNC Symbol;Acc:HGNC:7001]                       |             |             |                |
| Homeobox                         | 386                                                                      | 312         | 328         | 267            |
| 1.750542524                      | 1.369108011                                                              | 1.889893656 | 1.373978642 |                |
| 0.967727223                      | 0.973186631                                                              |             |             |                |
| ENSG00000178035                  | 9050.735637                                                              | 10119.91958 | 9848.629258 |                |
| 10279.91537                      | 12339.52666                                                              | 12752.39301 | 9673.094823 |                |
| 11790.61168                      | -0.285635508                                                             | 0.026945387 | 0.140512324 | IMPDH2         |
| 3                                | 49024325                                                                 | 49029408    | - 2773      |                |
| protein_coding                   | inosine monophosphate dehydrogenase 2 [Source:HGNC Symbol;Acc:HGNC:6053] |             |             |                |
|                                  | -                                                                        | 9976        | 11435       | 8472           |
| 14783                            | 176.1713387                                                              | 195.3946823 | 190.0828453 | 10810          |
| 198.840646                       | 239.6200666                                                              | 247.8812774 |             |                |
| ENSG00000203706                  | 117.0353746                                                              | 78.76456863 | 58.12458249 |                |
| 24.86324388                      | 36.5277385                                                               | 51.75834272 | 84.64150858 |                |
| 37.7164417                       | 1.164251967                                                              | 0.026952248 | 0.140512324 |                |
| SERTAD4-AS1                      | 1                                                                        | 210231456   | 210234047   | - 1004         |
| antisense                        | SERTAD4 antisense RNA 1 [Source:HGNC Symbol;Acc:HGNC:32019]              |             |             |                |
|                                  | -                                                                        | 129         | 89          | 50             |
| 60                               | 6.291941572                                                              | 4.200323447 | 3.098440339 | 32             |
| 1.328279814                      | 1.959131672                                                              | 2.778744114 |             |                |

|                         |                                                      |             |                                     |             |             |        |
|-------------------------|------------------------------------------------------|-------------|-------------------------------------|-------------|-------------|--------|
| ENSG0000004777          | 241.328757                                           |             | 219.478798                          |             | 254.5856713 |        |
| 173.0067386             | 58.21608324                                          |             | 166.4893357                         |             | 238.4644088 |        |
| 132.5707192             | 0.843132921                                          |             | 0.02698309                          |             | 0.140631668 |        |
| ARHGAP33                | 19                                                   | 35774532    | 35788822                            | +           | 5260        |        |
| protein_coding          | Rho GTPase activating protein 33 [Source:HGNC        |             |                                     |             |             |        |
| Symbol;Acc:HGNC:23085]  | -                                                    | 266         | 248                                 | 219         | 167         | 51     |
| 193                     | 2.476421558                                          |             | 2.23404737                          |             | 2.590390372 |        |
| 1.764179498             | 0.595980146                                          |             | 1.706092536                         |             |             |        |
| ENSG00000078098         | 543.4433286                                          |             | 464.6224554                         |             | 481.2715431 |        |
| 359.4810677             | 422.3519764                                          |             | 227.736708                          |             | 496.4457757 |        |
| 336.5232507             | 0.563578614                                          |             | 0.027024868                         |             | 0.140807921 | FAP    |
| 2                       | 162170684                                            |             | 162245151                           | -           | 7003        |        |
| protein_coding          | fibroblast activation protein alpha [Source:HGNC     |             |                                     |             |             |        |
| Symbol;Acc:HGNC:3590]   | -                                                    | 599         | 525                                 | 414         | 347         | 370    |
| 264                     | 4.188624027                                          |             | 3.552234418                         |             | 3.678096009 |        |
| 2.753324454             | 3.247618135                                          |             | 1.752874482                         |             |             |        |
| ENSG00000226950         | 891.8276996                                          |             | 702.6861516                         |             | 739.3446893 |        |
| 645.4083723             | 369.8433523                                          |             | 620.2374736                         |             | 777.9528468 |        |
| 545.1630661             | 0.511857134                                          |             | 0.027038494                         |             | 0.140835092 | DANCR  |
| 4                       | 52712404                                             |             | 52720351                            | +           | 2285        |        |
| processed_transcript    | differentiation antagonizing non-protein             |             |                                     |             |             |        |
| coding RNA [Source:HGNC | Symbol;Acc:HGNC:28964]                               | -           | 983                                 | 794         |             |        |
| 636                     | 623                                                  | 324         | 719                                 | 21.06667508 | 16.46496223 |        |
| 17.31720339             | 15.15004371                                          |             | 8.715778125                         |             | 14.63098968 |        |
| ENSG00000148541         | 99.79760626                                          |             | 66.37463648                         |             | 90.67434869 |        |
| 64.23004668             | 25.11282022                                          |             | 12.07694663                         |             | 85.61553048 |        |
| 33.80660451             | 1.34459602                                           |             | 0.027047175                         |             | 0.140835092 | FAM13C |
| 10                      | 59246129                                             |             | 59363181                            | -           | 6753        |        |
| protein_coding          | family with sequence similarity 13 member C          |             |                                     |             |             |        |
| [Source:HGNC            | Symbol;Acc:HGNC:19371]                               | -           | 110                                 | 75          | 78          |        |
| 62                      | 22                                                   | 14          | 0.797672498                         |             | 0.526248601 |        |
| 0.718628935             | 0.510160681                                          |             | 0.200250353                         |             | 0.09639673  |        |
| ENSG00000175198         | 420.9644482                                          |             | 367.2729885                         |             | 462.6716767 |        |
| 387.4522171             | 238.5717921                                          |             | 145.7859987                         |             | 416.9697045 |        |
| 257.2700026             | 0.697916627                                          |             | 0.027053968                         |             | 0.140835092 | PCCA   |
| 13                      | 100089015                                            |             | 100530437                           | +           | 7288        |        |
| protein_coding          | propionyl-CoA carboxylase subunit alpha [Source:HGNC |             |                                     |             |             |        |
| Symbol;Acc:HGNC:8653]   | -                                                    | 464         | 415                                 | 398         | 374         | 209    |
| 169                     | 3.117728551                                          |             | 2.698150519                         |             | 3.39767281  |        |
| 2.851512514             | 1.762727916                                          |             | 1.078224904                         |             |             |        |
| ENSG00000283445         | 8.165258694                                          |             | 10.61994184                         |             | 2.3249833   | 0      |
| 0                       | 0                                                    | 7.036727944 | 0                                   | 5.251925837 |             |        |
| 0.027060969             | 1                                                    | AL136985.3  | 1                                   | 58715609    |             |        |
| 58771295                | +                                                    | 4739        | lincRNA novel transcript            |             | -           |        |
| 9                       | 12                                                   | 2           | 0                                   | 0           | 0.093000329 |        |
| 0.119983349             | 0.026257304                                          |             | 0                                   | 0           |             |        |
| ENSG00000244578         | 9.07250966                                           |             | 15.92991276                         |             | 0           | 0      |
| 0                       | 8.334140805                                          |             | 0                                   | 5.496600175 | 0.027072872 |        |
| 0.140892038             | LINC01391                                            |             | 3                                   | 138935189   |             |        |
| 138944020               | -                                                    | 3889        | lincRNA long intergenic non-protein |             |             |        |

|                |                                     |                                        |             |             |             |             |      |
|----------------|-------------------------------------|----------------------------------------|-------------|-------------|-------------|-------------|------|
| coding RNA     | 1391                                | [Source:HGNC Symbol;Acc:HGNC:50666]    |             |             |             | -           | 10   |
|                | 18                                  | 0                                      | 0           | 0           | 0           | 0.125918848 |      |
|                | 0.219311297                         | 0                                      | 0           | 0           | 0           |             |      |
|                | ENSG00000165475                     | 280.3405485                            | 334.5281679 | 454.5342351 |             |             |      |
|                | 483.7972871                         | 512.5298308                            | 532.2482909 | 356.4676505 |             |             |      |
|                | 509.5251363                         | -0.517960841                           | 0.027096125 | 0.140971576 |             | CRYL1       |      |
|                | 13                                  | 20403666                               | 20525873    | -           | 4327        |             |      |
| protein_coding | crystallin lambda 1                 | [Source:HGNC                           |             |             |             |             |      |
|                | Symbol;Acc:HGNC:18246]              | -                                      | 309         | 378         | 391         | 467         | 449  |
|                | 617                                 | 3.497037326                            | 4.139342337 | 5.622075957 |             |             |      |
|                | 5.997110196                         | 6.378327373                            | 6.630240577 |             |             |             |      |
|                | ENSG00000134056                     | 237.6997531                            | 395.5928334 | 404.5470942 |             |             |      |
|                | 268.3158402                         | 184.9216762                            | 213.0718442 | 345.9465602 |             |             |      |
|                | 222.1031202                         | 0.638016337                            | 0.027129047 | 0.141101356 |             | MRPS36      |      |
|                | 5                                   | 69217760                               | 69230129    | +           | 1530        |             |      |
| protein_coding | mitochondrial ribosomal protein S36 | [Source:HGNC                           |             |             |             |             |      |
|                | Symbol;Acc:HGNC:16631]              | -                                      | 262         | 447         | 348         | 259         | 162  |
|                | 247                                 | 8.385684991                            | 13.84339252 | 14.15124532 |             |             |      |
|                | 9.406333595                         | 6.508350659                            | 7.506483608 |             |             |             |      |
|                | ENSG00000104774                     | 694.046989                             | 623.0365878 | 1050.892452 |             |             |      |
|                | 563.5668612                         | 639.2354238                            | 453.7481378 | 789.3253428 |             |             |      |
|                | 552.1834743                         | 0.515126755                            | 0.027174405 | 0.141257467 |             | MAN2B1      |      |
|                | 19                                  | 12646511                               | 12666742    | -           | 5374        |             |      |
| protein_coding | mannosidase alpha class 2B member 1 | [Source:HGNC                           |             |             |             |             |      |
|                | Symbol;Acc:HGNC:6826]               | -                                      | 765         | 704         | 904         | 544         | 560  |
|                | 526                                 | 6.970957847                            | 6.207281454 | 10.46592492 |             |             |      |
|                | 5.624880253                         | 6.405274187                            | 4.551128524 |             |             |             |      |
|                | ENSG00000256128                     | 42.6407954                             | 47.78973827 | 26.73730795 |             |             |      |
|                | 62.15810969                         | 115.2906746                            | 78.50015312 | 39.05594721 |             |             |      |
|                | 85.31631249                         | -1.120288137                           | 0.027175033 | 0.141257467 |             |             |      |
|                | LINC00944                           | 12                                     | 126729787   | 126772411   | -           | 1853        |      |
|                | lincRNA                             | long intergenic non-protein coding RNA | 944         |             |             |             |      |
|                | [Source:HGNC Symbol;Acc:HGNC:48640] | -                                      | 47          | 54          |             | 23          |      |
|                | 60                                  | 101                                    | 91          | 1.242084443 | 1.380844522 |             |      |
|                | 0.772252394                         | 1.799234934                            | 3.350374192 | 2.283478838 |             |             |      |
|                | ENSG00000267505                     | 4.53625483                             | 2.654985459 | 8.137441549 |             |             |      |
|                | 23.82727538                         | 23.97132839                            | 21.56597613 | 5.109560613 |             |             |      |
|                | 23.12152664                         | -2.196769844                           | 0.027188006 | 0.141283385 |             |             |      |
|                | AC005180.2                          | 17                                     | 44793199    | 44794474    | +           | 562         |      |
|                | lincRNA                             | novel transcript                       | -           | 5           | 3           | 7           |      |
|                | 23                                  | 21                                     | 25          | 0.435674732 | 0.252936427 |             |      |
|                | 0.774940879                         | 2.274068613                            | 2.296837866 | 2.068400867 |             |             |      |
|                | ENSG00000100982                     | 1188.498765                            | 1309.792827 | 1461.252004 |             |             |      |
|                | 1521.837719                         | 1814.972007                            | 1685.596694 | 1319.847865 |             |             |      |
|                | 1674.135473                         | -0.343489044                           | 0.027203111 | 0.141320362 |             | PCIF1       |      |
|                | 20                                  | 45934628                               | 45948023    | +           | 3219        |             |      |
| protein_coding | PDX1 C-terminal inhibiting factor 1 | [Source:HGNC                           |             |             |             |             |      |
|                | Symbol;Acc:HGNC:16200]              | -                                      | 1310        | 1480        | 1257        | 1469        | 1590 |
|                | 1954                                | 19.92870152                            | 21.78548232 | 24.29523743 |             |             |      |
|                | 25.35787535                         | 30.36151985                            | 28.22504226 |             |             |             |      |



|                                     |                                                 |             |               |        |  |
|-------------------------------------|-------------------------------------------------|-------------|---------------|--------|--|
| ENSG00000159461                     | 2494.032905                                     | 2492.146351 | 2986.441049   |        |  |
| 2260.483256                         | 1991.90324                                      | 2156.597613 | 2657.540102   |        |  |
| 2136.328036                         | 0.314414642                                     | 0.027215697 | 0.141344233   | AMFR   |  |
| 16                                  | 56361452                                        | 56425538    | - 5758        |        |  |
| protein_coding                      | autocrine motility factor receptor [Source:HGNC |             |               |        |  |
| Symbol;Acc:HGNC:463]                | -                                               | 2749 2816   | 2569 2182     | 1745   |  |
| 2500                                | 23.37931395                                     | 23.17327581 | 27.75871068   |        |  |
| 21.05693368                         | 18.62821025                                     | 20.18828217 |               |        |  |
| ENSG00000247809                     | 43.54804637                                     | 23.89486913 | 49.98714095   |        |  |
| 13.46759043                         | 14.83939377                                     | 9.489029498 | 39.14335215   |        |  |
| 12.59867123                         | 1.638466189                                     | 0.027285955 | 0.141667523   | NR2F2- |  |
| AS1 15                              | 96110040                                        | 96327361    | - 6063        |        |  |
| antisense                           | NR2F2 antisense RNA 1 [Source:HGNC              |             |               |        |  |
| Symbol;Acc:HGNC:44222]              | -                                               | 48 27       | 43 13         | 13     |  |
| 11                                  | 0.387687995                                     | 0.211009805 | 0.441253064   |        |  |
| 0.119142807                         | 0.131796278                                     | 0.084359915 |               |        |  |
| ENSG00000139641                     | 3476.585702                                     | 3080.668128 | 3563.036907   |        |  |
| 3114.121296                         | 2717.892043                                     | 1913.333402 | 3373.430246   |        |  |
| 2581.782247                         | 0.386169257                                     | 0.0273107   | 0.141754391   | ESYT1  |  |
| 12                                  | 56118250                                        | 56144671    | + 5493        |        |  |
| protein_coding                      | extended synaptotagmin 1 [Source:HGNC           |             |               |        |  |
| Symbol;Acc:HGNC:29534]              | -                                               | 3832 3481   | 3065 3006     | 2381   |  |
| 2218                                | 34.16210199                                     | 30.02761681 | 34.71584386   |        |  |
| 30.40824956                         | 26.64386083                                     | 18.77513035 |               |        |  |
| ENSG00000227076                     | 19.05227029                                     | 20.35488852 | 17.43737475   |        |  |
| 1.035968495                         | 4.565967313                                     | 4.313195226 | 18.94817785   |        |  |
| 3.305043678                         | 2.517781671                                     | 0.027339179 | 0.141860584   |        |  |
| AL158166.1                          | 10 127934698                                    | 127936167   | + 371         |        |  |
| sense_intronic                      | novel transcript                                |             |               |        |  |
| 15 1 4 5                            |                                                 | 2.771877726 | 2.937516855   | 23     |  |
| 2.515499272                         | 0.149774588                                     | 0.662725134 | 0.626652985   |        |  |
| ENSG00000176834                     | 310.2798304                                     | 232.7537253 | 276.6730127   |        |  |
| 165.7549592                         | 216.8834474                                     | 148.3739158 | 273.2355228   |        |  |
| 177.0041074                         | 0.628530332                                     | 0.027394204 | 0.142104422   | VSIG10 |  |
| 12                                  | 118063593                                       | 118136026   | - 8350        |        |  |
| protein_coding                      | V-set and immunoglobulin domain containing 10   |             |               |        |  |
| [Source:HGNC Symbol;Acc:HGNC:26078] | -                                               |             | 342 263       | 238    |  |
| 160 190 172                         |                                                 | 2.005710805 | 1.492435991   |        |  |
| 1.773361715                         | 1.064744857                                     | 1.398667507 | 0.957795935   |        |  |
| ENSG00000275367                     | 0.907250966                                     | 4.424975766 | 5.812458249   |        |  |
| 18.64743291                         | 0 65.56056744                                   | 3.714894994 | 28.06933345   |        |  |
| -2.935449419                        | 0.027425056                                     | 0.142222753 | AC092111.1    |        |  |
| 12                                  | 8217758 8221115 +                               | 3358        | lincRNA novel |        |  |
| transcript                          | - 1 5                                           | 5           | 18 0          | 76     |  |
| 0.014583037                         | 0.070553044                                     | 0.092639491 | 0.297854288   |        |  |
| 0                                   | 1.052358998                                     |             |               |        |  |
| ENSG00000169375                     | 1696.559306                                     | 1556.706474 | 2036.685371   |        |  |
| 1666.873308                         | 1184.868518                                     | 1130.057149 | 1763.31705    |        |  |
| 1327.266325                         | 0.409581649                                     | 0.027458093 | 0.142352346   | SIN3A  |  |
| 15                                  | 75369379                                        | 75455842    | - 12453       |        |  |

|                 |                                                   |              |             |             |             |                |   |        |
|-----------------|---------------------------------------------------|--------------|-------------|-------------|-------------|----------------|---|--------|
| protein_coding  | SIN3 transcription regulator family member A      |              |             |             |             |                |   |        |
|                 | [Source:HGNC Symbol;Acc:HGNC:19353]               | -            | 1870        | 1759        |             |                |   | 1752   |
|                 | 1609                                              | 1038         | 1310        | 7.353537339 | 6.692960966 |                |   |        |
|                 | 8.75320219                                        | 7.179498344  | 5.123547013 | 4.891345336 |             |                |   |        |
|                 | ENSG00000150893                                   | 108.8701159  | 75.22458802 | 86.02438209 |             |                |   |        |
|                 | 61.1221412                                        | 36.5277385   | 30.19236658 | 90.03969534 |             |                |   |        |
|                 | 42.6140821                                        | 1.081771268  | 0.027535127 | 0.14270989  |             |                |   | FREM2  |
|                 | 13                                                | 38687129     | 38887131    | +           | 16223       |                |   |        |
| protein_coding  | FRAS1 related extracellular matrix protein 2      |              |             |             |             |                |   |        |
|                 | [Source:HGNC Symbol;Acc:HGNC:25396]               | -            | 120         | 85          |             |                |   | 74     |
|                 | 59                                                | 32           | 35          | 0.362225284 | 0.248264257 |                |   |        |
|                 | 0.283796737                                       | 0.202084446  | 0.121245651 | 0.100315466 |             |                |   |        |
|                 | ENSG00000169955                                   | 189.6154519  | 185.8489822 | 155.7738811 |             |                |   |        |
|                 | 269.3518087                                       | 345.8720239  | 213.0718442 | 177.0794384 |             |                |   |        |
|                 | 276.0985589                                       | -0.637440758 | 0.027543585 | 0.142711912 |             |                |   | ZNF747 |
|                 | 16                                                | 30530367     | 30535347    | -           | 3936        |                |   |        |
| protein_coding  | zinc finger protein 747 [Source:HGNC              |              |             |             |             |                |   |        |
|                 | Symbol;Acc:HGNC:28350]                            | zf-C2H2      | 209         | 210         | 134         | 260            |   | 303    |
|                 | 247                                               | 2.600278589  | 2.528079027 | 2.118149235 |             |                |   |        |
|                 | 3.670542879                                       | 4.731892819  | 2.917916646 |             |             |                |   |        |
|                 | ENSG00000133997                                   | 471.7705023  | 554.0069659 | 455.6967268 |             |                |   |        |
|                 | 678.5593642                                       | 641.5184074  | 657.3309525 | 493.8247316 |             |                |   |        |
|                 | 659.1362414                                       | -0.415806327 | 0.027586072 | 0.142878223 |             |                |   | MED6   |
|                 | 14                                                | 70581257     | 70600690    | -           | 4219        |                |   |        |
| protein_coding  | mediator complex subunit 6 [Source:HGNC           |              |             |             |             |                |   |        |
|                 | Symbol;Acc:HGNC:19970]                            | -            | 520         | 626         | 392         | 655            |   | 562    |
|                 | 762                                               | 6.035628517  | 7.030581526 | 5.780739357 |             |                |   |        |
|                 | 8.626682577                                       | 8.187930551  | 8.398011482 |             |             |                |   |        |
|                 | ENSG00000178927                                   | 1336.380673  | 1555.821479 | 1412.427355 |             |                |   |        |
|                 | 1570.528238                                       | 1941.6776    | 1945.251047 | 1434.876502 |             |                |   |        |
|                 | 1819.152295                                       | -0.342303394 | 0.027591837 | 0.142878223 |             |                |   | CYBC1  |
|                 | 17                                                | 82442589     | 82450829    | -           | 7234        |                |   |        |
| protein_coding  | cytochrome b-245 chaperone 1 [Source:HGNC         |              |             |             |             |                |   |        |
|                 | Symbol;Acc:HGNC:28672]                            | -            | 1473        | 1758        | 1215        | 1516           |   | 1701   |
|                 | 2255                                              | 9.971326247  | 11.51507596 | 10.44971919 |             |                |   |        |
|                 | 11.64481895                                       | 14.45350475  | 14.49436054 |             |             |                |   |        |
|                 | ENSG00000150630                                   | 2340.707492  | 2715.16513  | 2487.732131 |             |                |   |        |
|                 | 3149.344225                                       | 2907.379686  | 3179.687521 | 2514.534918 |             |                |   |        |
|                 | 3078.803811                                       | -0.29215337  | 0.027654696 | 0.143139362 |             |                |   | VEGFC  |
|                 | 4                                                 | 176683538    | 176792727   | -           | 2420        |                |   |        |
| protein_coding  | vascular endothelial growth factor C [Source:HGNC |              |             |             |             |                |   |        |
|                 | Symbol;Acc:HGNC:12682]                            | -            | 2580        | 3068        | 2140        | 3040           |   | 2547   |
|                 | 3686                                              | 52.20751519  | 60.07121694 | 55.01805764 |             |                |   |        |
|                 | 69.80238492                                       | 64.69354343  | 70.82245596 |             |             |                |   |        |
|                 | ENSG00000111644                                   | 0            | 0.884995153 | 0           | 7.251779464 |                |   |        |
|                 | 6.848950969                                       | 11.21430759  | 0.294998384 |             |             |                |   |        |
|                 | 8.438346007                                       | -4.592987192 | 0.027658451 | 0.143139362 |             |                |   | ACRBP  |
|                 | 12                                                | 6638075      | 6647460     | -           | 2843        | protein_coding |   |        |
| acrosin binding | protein [Source:HGNC Symbol;Acc:HGNC:17195]       |              |             |             |             |                |   | -      |
|                 | 0                                                 | 1            | 0           | 7           | 6           | 13             | 0 |        |

|                                 |                                             |                        |             |             |                       |         |
|---------------------------------|---------------------------------------------|------------------------|-------------|-------------|-----------------------|---------|
| 0.016666699                     | 0                                           | 0.136814845            | 0.129724424 | 0.212616767 |                       |         |
| ENSG00000074935                 | 303.9290736                                 | 223.9037737            | 201.1110554 |             |                       |         |
| 290.0711786                     | 460.0212068                                 | 360.5831209            | 242.9813009 |             |                       |         |
| 370.2251688                     | -0.605333562                                | 0.027686367            | 0.143224888 |             | TUBE1                 |         |
| 6                               | 112070777                                   | 112087529              | -           | 6973        |                       |         |
| protein_coding                  | tubulin epsilon 1 [Source:HGNC              | Symbol;Acc:HGNC:20775] |             |             |                       |         |
| -                               | 335                                         | 253                    | 173         | 280         | 403 418               |         |
| 2.352631055                     | 1.71920354                                  | 1.543594721            | 2.231261181 |             |                       |         |
| 3.552488994                     | 2.787325158                                 |                        |             |             |                       |         |
| ENSG00000173575                 | 1017.028333                                 | 928.3599156            | 902.0935203 |             |                       |         |
| 813.2352685                     | 505.6808799                                 | 763.4355551            | 949.1605896 |             |                       |         |
| 694.1172345                     | 0.450633586                                 | 0.027691801            | 0.143224888 |             | CHD2                  |         |
| 15                              | 92900189                                    | 93028005               | +           | 16960       |                       |         |
| protein_coding                  | chromodomain helicase DNA binding protein 2 |                        |             |             |                       |         |
| [Source:HGNC                    | Symbol;Acc:HGNC:1917]                       | -                      | 1121        | 1049        | 776                   |         |
| 785                             | 443                                         | 885                    | 3.23674472  | 2.93073183  |                       |         |
| 2.846706677                     | 2.571910506                                 | 1.605555189            | 2.426322027 |             |                       |         |
| ENSG00000177556                 | 288.5058072                                 | 450.4625329            | 464.99666   |             |                       |         |
| 247.5964703                     | 179.214217                                  | 339.8797838            | 401.3216667 |             |                       |         |
| 255.5634904                     | 0.647703918                                 | 0.027699267            | 0.143224888 |             | ATOX1                 |         |
| 5                               | 151742316                                   | 151772532              | -           | 5239        |                       |         |
| protein_coding                  | antioxidant 1 copper chaperone [Source:HGNC | Symbol;Acc:HGNC:798]   | -           | 318         | 509                   | 400 239 |
| 394                             | 2.972401043                                 | 4.603581379            | 4.750271579 |             | 157                   |         |
| 2.534904172                     | 1.842038123                                 | 3.496864801            |             |             |                       |         |
| ENSG00000176973                 | 312.0943323                                 | 390.2828625            | 346.4225117 |             |                       |         |
| 429.9269254                     | 546.7745857                                 | 487.3910606            | 349.5999022 |             |                       |         |
| 488.0308572                     | -0.480701032                                | 0.027709033            | 0.143233515 |             | FAM89B                |         |
| 11                              | 65572349                                    | 65574198               | +           | 1458        |                       |         |
| protein_coding                  | family with sequence similarity 89 member B |                        |             |             |                       |         |
| [Source:HGNC                    | Symbol;Acc:HGNC:16708]                      | -                      | 344         | 441         | 298                   |         |
| 415                             | 479                                         | 565                    | 11.55392654 | 14.33202333 |                       |         |
| 12.71644118                     | 15.81621705                                 | 20.19413939            | 18.01863724 |             |                       |         |
| ENSG00000110852                 | 9.07250966                                  | 0                      | 0           | 11.39565344 |                       |         |
| 23.97132839                     | 36.2308399                                  | 3.024169887            |             |             |                       |         |
| 23.86594058                     | -2.957528305                                | 0.027750887            | 0.14340796  |             | CLEC2B                |         |
| 12                              | 9852984                                     | 9870136                | -           | 2638        | protein_coding C-type |         |
| lectin domain family 2 member B | [Source:HGNC                                | Symbol;Acc:HGNC:2053]  |             |             |                       |         |
| -                               | 10                                          | 0                      | 0           | 11          | 21 42                 |         |
| 0.185632448                     | 0                                           | 0                      | 0.231702083 | 0.489318757 |                       |         |
| 0.740296195                     |                                             |                        |             |             |                       |         |
| ENSG00000076043                 | 1027.915344                                 | 1138.103767            | 991.6053774 |             |                       |         |
| 859.8538508                     | 808.1762143                                 | 802.2543121            | 1052.541496 |             |                       |         |
| 823.4281257                     | 0.354647905                                 | 0.027776696            | 0.143499408 |             | REX02                 |         |
| 11                              | 114439386                                   | 114450279              | +           | 3699        |                       |         |
| protein_coding                  | RNA exonuclease 2 [Source:HGNC              | Symbol;Acc:HGNC:17851] |             |             |                       |         |
| -                               | 1133                                        | 1286                   | 853         | 830         | 708 930               |         |
| 14.99941296                     | 16.47339371                                 | 14.34734516            | 12.4682587  |             |                       |         |
| 11.76511798                     | 11.69040711                                 |                        |             |             |                       |         |
| ENSG00000184260                 | 31.75378381                                 | 35.39980612            | 31.38727455 |             |                       |         |

|                        |                                                    |                |                         |                       |                |
|------------------------|----------------------------------------------------|----------------|-------------------------|-----------------------|----------------|
| 15.53952742            | 0                                                  | 0              | 32.84695483             | 5.179842475           |                |
| 2.671024223            | 0.027788031                                        |                | 0.143505158             | HIST2H2AC             | 1              |
| 149886975              |                                                    | 149887364      | +                       | 390                   | protein_coding |
|                        | histone cluster 2 H2A family member c [Source:HGNC |                |                         |                       |                |
| Symbol;Acc:HGNC:4738]  | -                                                  | 35             | 40                      | 27                    | 15             |
| 0                      | 4.394729216                                        | 4.859838365    |                         | 4.307308754           | 0              |
| 2.137168162            | 0                                                  | 0              |                         |                       |                |
| ENSG00000274641        | 7.258007728                                        | 6.194966072    |                         | 6.974949899           | 0              |
| 0                      | 0                                                  | 6.8093079      | 0                       | 5.200404654           |                |
| 0.027789734            | 1                                                  | HIST1H2B0      | 6                       | 27893463              |                |
| 27893843               | +                                                  | 381            | protein_coding          | histone cluster 1 H2B |                |
| family member o        | [Source:HGNC Symbol;Acc:HGNC:4758]                 |                |                         |                       |                |
| 7                      | 6                                                  | 0              | 0                       | 0                     | 1.028238107    |
| 0.870561597            | 0.979790268                                        | 0              | 0                       | 0                     |                |
| ENSG00000048162        | 1079.62865                                         | 1485.906862    |                         | 1035.78006            |                |
| 1362.298571            | 1533.023525                                        | 1928.860905    |                         | 1200.438524           |                |
| 1608.061               | -0.421603245                                       | 0.027794034    |                         | 0.143505158           | NOP16          |
| 5                      | 176383938                                          | 176388975      |                         | -                     | 2862           |
| protein_coding         | NOP16 nucleolar protein [Source:HGNC               |                |                         |                       |                |
| Symbol;Acc:HGNC:26934] | -                                                  | 1190           | 1679                    | 891                   | 1315           |
| 2236                   | 20.36132404                                        | 27.7976132     |                         | 19.3693444            | 1343           |
| 25.53102007            | 28.84388421                                        | 36.32730564    |                         |                       |                |
| ENSG00000146833        | 657.7569503                                        | 764.6358123    |                         | 796.3067802           |                |
| 930.2997084            | 873.2412486                                        | 1111.941729    |                         | 739.5665143           |                |
| 971.8275621            | -0.395304035                                       | 0.027874995    |                         | 0.143881177           | TRIM4          |
| 7                      | 99876958                                           | 99919600       |                         | -                     | 4891           |
| protein_coding         | tripartite motif containing 4 [Source:HGNC         |                |                         |                       |                |
| Symbol;Acc:HGNC:16275] | -                                                  | 725            | 864                     | 685                   | 898            |
| 1289                   | 7.258870145                                        | 8.370328846    |                         | 8.713642849           | 765            |
| 10.20212681            | 9.614155287                                        | 12.25423692    |                         |                       |                |
| ENSG00000138311        | 264.9172821                                        | 270.8085169    |                         | 174.3737475           |                |
| 335.6537923            | 358.428434                                         | 363.1710381    |                         | 236.6998488           |                |
| 352.4177548            | -0.571458254                                       | 0.027893576    |                         | 0.143935083           | ZNF365         |
| 10                     | 62374192                                           | 62670301       |                         | +                     | 5368           |
| protein_coding         | zinc finger protein 365 [Source:HGNC               |                |                         |                       |                |
| Symbol;Acc:HGNC:18194] | -                                                  | 292            | 306                     | 150                   | 324            |
| 421                    | 2.663784134                                        | 2.70106702     |                         | 1.738543648           | 314            |
| 3.353857041            | 3.595543117                                        | 3.646704784    |                         |                       |                |
| ENSG00000081985        | 3.629003864                                        | 8.849951531    |                         | 8.137441549           | 0              |
| 0                      | 0                                                  | 6.872132315    | 0                       | 5.212936673           |                |
| 0.027898384            | 1                                                  | IL12RB2 1      | 67307364                | 67397090              |                |
| +                      | 4423                                               | protein_coding | interleukin 12 receptor |                       |                |
| subunit beta 2         | [Source:HGNC Symbol;Acc:HGNC:5972]                 |                |                         |                       |                |
| 10                     | 7                                                  | 0              | 0                       | 0                     | 0.044286538    |
| 0.107129604            | 0.098466374                                        | 0              | 0                       | 0                     |                |
| ENSG00000124575        | 3.629003864                                        | 8.849951531    |                         | 8.137441549           | 0              |
| 0                      | 0                                                  | 6.872132315    | 0                       | 5.212936673           |                |
| 0.027898384            | 1                                                  | HIST1H1D       | 6                       | 26234268              |                |
| 26234933               | -                                                  | 666            | protein_coding          | histone cluster 1 H1  |                |
| family member d        | [Source:HGNC Symbol;Acc:HGNC:4717]                 |                |                         |                       |                |
|                        |                                                    |                |                         |                       | 4              |

|                 |                                    |                                     |             |        |             |  |
|-----------------|------------------------------------|-------------------------------------|-------------|--------|-------------|--|
| 10              | 7                                  | 0                                   | 0           | 0      | 0.294113152 |  |
| 0.711462824     | 0.65392909                         | 0                                   | 0           | 0      |             |  |
| ENSG00000170624 | 107.055614                         | 73.45459771                         | 125.5490982 |        |             |  |
| 24.86324388     | 83.32890346                        | 21.56597613                         | 102.01977   |        |             |  |
| 43.25270782     | 1.245301724                        | 0.027912504                         | 0.143990749 | SGCD   |             |  |
| 5               | 155870344                          | 156767788                           | + 10584     |        |             |  |
| protein_coding  | sarcoglycan delta                  | [Source:HGNC Symbol;Acc:HGNC:10807] |             |        |             |  |
| -               | 118 83                             | 108 24                              | 73 25       |        |             |  |
| 0.545960043     | 0.371582029                        | 0.634864102                         | 0.126000844 |        |             |  |
| 0.423955613     | 0.109830054                        |                                     |             |        |             |  |
| ENSG00000116852 | 1073.277893                        | 993.849557                          | 1332.215431 |        |             |  |
| 741.7534424     | 993.0978905                        | 822.0950101                         | 1133.114293 |        |             |  |
| 852.3154477     | 0.41055124                         | 0.027931166                         | 0.144045013 | KIF21B |             |  |
| 1               | 200969390                          | 201023700                           | - 12150     |        |             |  |
| protein_coding  | kinesin family member 21B          | [Source:HGNC Symbol;Acc:HGNC:29442] |             |        |             |  |
| -               | 1183 1123                          | 1146 716                            | 870         |        |             |  |
| 953             | 4.768009919                        | 4.379554339                         | 5.868338895 |        |             |  |
| 3.274528601     | 4.40139489                         | 3.647099743                         |             |        |             |  |
| ENSG00000107560 | 635.0756762                        | 572.5918641                         | 494.0589512 |        |             |  |
| 688.9190491     | 826.4400836                        | 758.2597208                         | 567.2421638 |        |             |  |
| 757.8729512     | -0.416691833                       | 0.02796539                          | 0.144179477 |        |             |  |
| RAB11FIP2       | 10 118004916                       | 118046603                           | -           | 6169   |             |  |
| protein_coding  | RAB11 family interacting protein 2 | [Source:HGNC Symbol;Acc:HGNC:29152] |             |        |             |  |
| -               | 700 647                            | 425                                 |             |        |             |  |
| 665             | 724 879                            | 5.556636065                         | 4.969537261 |        |             |  |
| 4.286284625     | 5.98989099                         | 7.213917248                         | 6.625293511 |        |             |  |
| ENSG00000155366 | 2842.417276                        | 3579.805394                         | 4903.389779 |        |             |  |
| 2433.489995     | 3196.177119                        | 2876.038577                         | 3775.20415  |        |             |  |
| 2835.23523      | 0.412770249                        | 0.027990053                         | 0.144264583 | RHOC   |             |  |
| 1               | 112701106                          | 112707434                           | - 4028      |        |             |  |
| protein_coding  | ras homolog family member C        | [Source:HGNC Symbol;Acc:HGNC:669]   |             |        |             |  |
| -               | 3133 4045                          | 4218 2349                           | 2800        |        |             |  |
| 3334            | 38.08900402                        | 47.58340375                         | 65.15143116 |        |             |  |
| 32.40452043     | 42.72833104                        | 38.48638781                         |             |        |             |  |
| ENSG00000166359 | 39.01179154                        | 28.3198449                          | 24.41232465 |        |             |  |
| 59.05020421     | 94.74382174                        | 56.93417699                         | 30.58132036 |        |             |  |
| 70.24273431     | -1.193890786                       | 0.02799829                          | 0.144265    | WDR88  |             |  |
| 19              | 33132090                           | 33175795                            | + 1841      |        |             |  |
| protein_coding  | WD repeat domain 88                | [Source:HGNC Symbol;Acc:HGNC:26999] |             |        |             |  |
| -               | 43 32                              | 21 57                               | 83          |        |             |  |
| 66              | 1.143782245                        | 0.823611934                         | 0.709695992 |        |             |  |
| 1.720414566     | 2.771224208                        | 1.666944595                         |             |        |             |  |
| ENSG00000104450 | 727.6152747                        | 542.5020289                         | 562.6459585 |        |             |  |
| 536.6316804     | 382.3997624                        | 381.286458                          | 610.9210874 |        |             |  |
| 433.4393003     | 0.495795948                        | 0.028147517                         | 0.144991678 | SPAG1  |             |  |
| 8               | 100157906                          | 100259278                           | + 5055      |        |             |  |
| protein_coding  | sperm associated antigen 1         | [Source:HGNC Symbol;Acc:HGNC:11212] |             |        |             |  |
| -               | 802 613                            | 484 518                             | 335         |        |             |  |
| 442             | 7.769300009                        | 5.74600177                          | 5.957047298 |        |             |  |
| 5.694041701     | 4.073530828                        | 4.065670022                         |             |        |             |  |

|                                     |                                                                   |             |             |             |
|-------------------------------------|-------------------------------------------------------------------|-------------|-------------|-------------|
| ENSG00000167721                     | 4021.843532                                                       | 3649.720011 | 3323.563627 |             |
| 4216.391774                         | 4458.667081                                                       | 4780.745589 | 3665.04239  |             |
| 4485.268148                         | -0.291222681                                                      | 0.028204109 | 0.145240898 | TSR1        |
| 17                                  | 2322503                                                           | 2337507     | -           | 5545        |
| protein_coding                      | ribosome maturation factor [Source:HGNC Symbol;Acc:HGNC:25542]" - |             |             |             |
| 4433                                | 4124                                                              | 2859        | 4070        | 3906        |
| 35.24062052                         | 32.0788988                                                        | 40.78541657 | 43.29901818 |             |
| 46.47249497                         |                                                                   |             |             |             |
| ENSG00000124422                     | 7092.888052                                                       | 6206.471009 | 7130.72378  |             |
| 5956.818846                         | 5471.170332                                                       | 5496.735996 | 6810.027614 |             |
| 5641.575058                         | 0.271482791                                                       | 0.028234398 | 0.14535456  | USP22       |
| 17                                  | 20999593                                                          | 21043760    | -           | 6808        |
| protein_coding                      | ubiquitin specific peptidase 22 [Source:HGNC                      |             |             |             |
| Symbol;Acc:HGNC:12621]              | -                                                                 | 7818        | 7013        | 6134        |
| 6372                                | 56.23475438                                                       | 48.81021635 | 56.05715738 | 4793        |
| 46.9310576                          | 43.27481721                                                       | 43.51983481 |             |             |
| ENSG00000198742                     | 674.0874677                                                       | 715.9610789 | 691.6825317 |             |
| 869.1775672                         | 962.2776112                                                       | 853.1500158 | 693.9103594 |             |
| 894.8683981                         | -0.366443021                                                      | 0.028319501 | 0.145646744 | SMURF1      |
| 7                                   | 99027438                                                          | 99144100    | -           | 6276        |
| protein_coding                      | SMAD specific E3 ubiquitin protein ligase 1                       |             |             |             |
| [Source:HGNC Symbol;Acc:HGNC:16807] | -                                                                 | 743         | 809         | 595         |
| 839                                 | 843                                                               | 989         | 5.797417303 | 6.107901539 |
| 5.898490407                         | 7.42832796                                                        | 8.256424234 | 7.327306777 |             |
| ENSG00000123500                     | 367.4366412                                                       | 462.8524651 | 404.5470942 |             |
| 190.6182031                         | 348.1550076                                                       | 284.6708849 | 411.6120668 |             |
| 274.4813652                         | 0.585467082                                                       | 0.028326449 | 0.145646744 |             |
| COL10A1                             | 6                                                                 | 116118923   | 116158747   | -           |
| 3816                                |                                                                   |             |             |             |
| protein_coding                      | collagen type X alpha 1 chain [Source:HGNC                        |             |             |             |
| Symbol;Acc:HGNC:2185]               | -                                                                 | 405         | 523         | 348         |
| 330                                 | 5.197270737                                                       | 6.49411184  | 5.673848359 | 305         |
| 2.679300966                         | 4.912910285                                                       | 4.021023322 |             |             |
| ENSG00000136875                     | 2326.191477                                                       | 2469.136477 | 2147.122077 |             |
| 2710.093583                         | 2997.557541                                                       | 2800.126341 | 2314.15001  |             |
| 2835.925821                         | -0.292909315                                                      | 0.028328507 | 0.145646744 | PRPF4       |
| 9                                   | 113275343                                                         | 113292905   | +           | 3613        |
| protein_coding                      | pre-mRNA processing factor 4 [Source:HGNC                         |             |             |             |
| Symbol;Acc:HGNC:17349]              | -                                                                 | 2564        | 2790        | 1847        |
| 3246                                | 34.75191512                                                       | 36.590023   | 31.80576022 | 2626        |
| 40.23294483                         | 44.67598335                                                       | 41.77452997 |             |             |
| ENSG00000151327                     | 712.1920083                                                       | 759.3258414 | 647.507849  |             |
| 625.7249709                         | 509.1053554                                                       | 402.8524341 | 706.3418996 |             |
| 512.5609201                         | 0.464185732                                                       | 0.028335436 | 0.145646744 |             |
| FAM177A1                            | 14                                                                | 35044907    | 35113130    | +           |
| 8385                                |                                                                   |             |             |             |
| protein_coding                      | family with sequence similarity 177 member A1                     |             |             |             |
| [Source:HGNC Symbol;Acc:HGNC:19829] | -                                                                 | 785         | 858         | 557         |
| 604                                 | 446                                                               | 467         | 4.584534796 | 4.848536415 |
| 4.132938805                         | 4.002634324                                                       | 3.269483515 | 2.589672421 |             |
| ENSG00000186871                     | 978.9237923                                                       | 752.2458802 | 762.5945223 |             |
| 739.6815054                         | 550.1990612                                                       | 538.2867643 | 831.2547316 |             |

|                        |                                                      |             |                            |             |
|------------------------|------------------------------------------------------|-------------|----------------------------|-------------|
| 609.3891103            | 0.448556096                                          | 0.028335938 | 0.145646744                | ERCC6L      |
| X                      | 72204657                                             | 72239047    | - 4364                     |             |
| protein_coding         | "ERCC excision repair 6 like, spindle assembly       |             |                            |             |
| checkpoint helicase    | [Source:HGNC Symbol;Acc:HGNC:20794]"                 |             |                            | -           |
| 1079                   | 850                                                  | 656         | 714                        | 482         |
| 9.22912705             | 9.352461823                                          | 9.091290044 | 624                        | 12.10780412 |
| 6.648610114            |                                                      |             |                            | 6.789060151 |
| ENSG00000186812        | 361.9931354                                          | 332.7581776 | 301.0853373                |             |
| 465.1498542            | 495.4074534                                          | 421.8304931 | 331.9455501                |             |
| 460.7959336            | -0.471451964                                         | 0.028340556 | 0.145646744                | ZNF397      |
| 18                     | 35241030                                             | 35267133    | + 8710                     |             |
| protein_coding         | zinc finger protein 397 [Source:HGNC                 |             |                            |             |
| Symbol;Acc:HGNC:18818] | zf-C2H2                                              | 399         | 376                        | 259         |
| 489                    | 2.243279689                                          | 2.045484207 | 1.850071256                | 449         |
| 2.864443297            | 3.062802089                                          | 2.610488127 |                            | 434         |
| ENSG00000265917        | 0                                                    | 0           | 0                          | 15.53952742 |
| 0                      | 0                                                    | 8.223820683 | -5.512605553               | 9.131934625 |
| 0.145796136            | MIR3685                                              | 12          | 95309923                   | 0.028377867 |
| +                      | 62                                                   | miRNA       | microRNA 3685 [Source:HGNC | 95309984    |
| Symbol;Acc:HGNC:38886] | -                                                    | 0           | 0                          | 0           |
| 0                      | 0                                                    | 0           | 13.44347715                | 15          |
| 0                      |                                                      |             |                            | 8           |
| ENSG00000175764        | 176.9139384                                          | 188.5039676 | 145.3114562                |             |
| 143.9996208            | 54.79160775                                          | 77.63751407 | 170.2431207                |             |
| 92.14291421            | 0.885988591                                          | 0.028400089 | 0.145867939                | TTLL11      |
| 9                      | 121821928                                            | 122093606   | - 3535                     |             |
| protein_coding         | tubulin tyrosine ligase like 11 [Source:HGNC         |             |                            |             |
| Symbol;Acc:HGNC:18113] | -                                                    | 195         | 213                        | 125         |
| 90                     | 2.701306582                                          | 2.855069116 | 2.200024116                | 139         |
| 2.184929487            | 0.834639971                                          | 1.183815738 |                            | 48          |
| ENSG00000189014        | 9.979760626                                          | 6.194966072 | 9.299933199                | 0           |
| 0                      | 0.862639045                                          | 8.491553299 | 0.287546348                |             |
| 4.556538353            | 0.028490905                                          | 0.1462388   | SHLD2P3                    | 10          |
| 47689707               | 47730436                                             | + 2712      | unprocessed_pseudogene     |             |
|                        | shieldin complex subunit 2 pseudogene 3 [Source:HGNC |             |                            |             |
| Symbol;Acc:HGNC:34038] | -                                                    | 11          | 7                          | 8           |
| 1                      | 0.198623982                                          | 0.122302348 | 0.183530035                | 0           |
| 0                      | 0.017145152                                          |             |                            | 0           |
| ENSG00000152291        | 4158.838428                                          | 3779.814299 | 4132.657815                |             |
| 3795.788565            | 2924.502064                                          | 2970.928872 | 4023.770181                |             |
| 3230.4065              | 0.31680589                                           | 0.028495969 | 0.1462388                  | TGOLN2      |
| 2                      | 85318020                                             | 85328425    | - 7081                     |             |
| protein_coding         | trans-golgi network protein 2 [Source:HGNC           |             |                            |             |
| Symbol;Acc:HGNC:15450] | -                                                    | 4584        | 4271                       | 3555        |
| 3444                   | 31.7014187                                           | 28.57994692 | 31.23574418                | 3664        |
| 28.75232139            | 22.23985192                                          | 22.61515489 |                            | 2562        |
| ENSG00000274191        | 0                                                    | 16.81490791 | 8.137441549                | 0           |
| 0                      | 8.31744982                                           | 0           | 5.489674973                | 0.028500156 |
| 0.1462388              | AC026333.4                                           | 12          | 122634130                  |             |
| 122634673              | +                                                    | 544         | lincRNA novel transcript   | -           |

|                                      |                                                 |             |              |                        |                  |             |
|--------------------------------------|-------------------------------------------------|-------------|--------------|------------------------|------------------|-------------|
| 0                                    | 19                                              | 7           | 0            | 0                      | 0                | 0           |
| 1.654935767                          | 0.800582305                                     |             | 0            | 0                      | 0                |             |
| ENSG00000251131                      | 10.88701159                                     |             | 6.194966072  |                        | 3.48747495       | 0           |
| 0                                    | 0                                               | 6.856484204 | 0            |                        | 5.213271798      |             |
| 0.028500665                          | 1                                               | AC025171.3  | 5            |                        | 43018429         |             |
| 43024247                             | +                                               | 553         | antisense    |                        | novel transcript |             |
| -                                    | 12                                              | 7           | 3            | 0                      | 0                | 0           |
| 1.062636669                          | 0.599790178                                     |             | 0.337522687  |                        | 0                | 0           |
| ENSG00000173811                      | 0                                               | 0           | 0            | 0                      | 30.82027936      | 0           |
| 0                                    | 10.27342645                                     |             | -5.832301235 |                        | 0.028505364      |             |
| 0.1462388                            | CCDC13-AS1                                      |             | 3            | 42732575               |                  | 42746768    |
| +                                    | 2164                                            | antisense   |              | CCDC13 antisense RNA 1 |                  |             |
| [Source:HGNC Symbol;Acc:HGNC:41142]  |                                                 |             | -            | 0                      | 0                | 0           |
| 0                                    | 27                                              | 0           | 0            | 0                      | 0                | 0           |
| 0.766926718                          | 0                                               |             |              |                        |                  |             |
| ENSG00000284024                      | 577.0116144                                     |             | 552.2369755  |                        | 495.2214429      |             |
| 659.9119313                          | 646.0843747                                     |             | 906.6336366  |                        | 541.4900109      |             |
| 737.5433142                          | -0.446303179                                    |             | 0.028518456  |                        | 0.146263544      | HSPA14      |
| 10                                   | 14838160                                        |             | 14847018     | +                      | 4924             |             |
| protein_coding                       | heat shock protein family A (Hsp70) member 14   |             |              |                        |                  |             |
| [Source:NCBI gene;Acc:51182]         |                                                 |             | -            | 636                    | 624              | 426 637     |
| 566                                  | 1051                                            | 6.325105226 |              | 6.004723113            |                  | 5.382678013 |
| 7.1884198                            |                                                 | 7.065546308 |              | 9.924661195            |                  |             |
| ENSG00000227706                      | 43.54804637                                     |             | 16.81490791  |                        | 29.06229125      |             |
| 2.07193699                           | 0                                               | 13.80222472 |              | 29.80841517            |                  | 5.291387238 |
| 2.459460154                          | 0.028631402                                     |             | 0.146760863  |                        | AL713998.1       |             |
| 6                                    | 67887646                                        |             | 67889339     | -                      | 1605             |             |
| lincRNA                              | novel transcript                                |             |              |                        |                  |             |
| 0                                    | 16                                              | 1.464518574 |              | 0.560925269            |                  | 0.969107196 |
| 0.069241585                          | 0                                               | 0.46352799  |              |                        |                  |             |
| ENSG00000103260                      | 2074.882959                                     |             | 2685.96029   |                        | 2849.267034      |             |
| 1607.823104                          | 2288.691115                                     |             | 1943.525769  |                        | 2536.703428      |             |
| 1946.679996                          | 0.381888772                                     |             | 0.028636793  |                        | 0.146760863      | METRN       |
| 16                                   | 715115                                          | 719655      | +            | 3692                   |                  |             |
| protein_coding                       | "meteorin, glial cell differentiation regulator |             |              |                        |                  |             |
| [Source:HGNC Symbol;Acc:HGNC:14151]" |                                                 |             | -            | 2287                   | 3035             | 2451        |
| 1552                                 | 2005                                            | 2253        | 30.3342426   |                        | 38.95143337      |             |
| 41.30365319                          | 23.35834498                                     |             | 33.38105396  |                        | 28.37465028      |             |
| ENSG00000167740                      | 289.4130581                                     |             | 384.9728916  |                        | 292.9478958      |             |
| 341.8696033                          | 434.9083865                                     |             | 702.1881829  |                        | 322.4446152      |             |
| 492.9887242                          | -0.613281195                                    |             | 0.028643059  |                        | 0.146760863      | CYB5D2      |
| 17                                   | 4143168                                         | 4187310     | +            | 2182                   | protein_coding   |             |
| cytochrome b5 domain containing      | 2 [Source:HGNC Symbol;Acc:HGNC:28471]           |             |              |                        |                  |             |
| -                                    | 319                                             | 435         | 252          | 330                    | 381              | 814         |
| 7.159202065                          | 9.446282981                                     |             | 7.185427986  |                        | 8.403713486      |             |
| 10.73291252                          | 17.34605331                                     |             |              |                        |                  |             |
| ENSG00000132879                      | 84.37433984                                     |             | 166.3790888  |                        | 169.7237809      |             |
| 200.977888                           | 237.4303003                                     |             | 263.1049088  |                        | 140.1590698      |             |
| 233.837699                           | -0.740966838                                    |             | 0.02864861   |                        | 0.146760863      | FBX044      |
| 1                                    | 11654375                                        |             | 11663327     | +                      | 3527             |             |



|                         |                                                       |             |             |             |             |                |
|-------------------------|-------------------------------------------------------|-------------|-------------|-------------|-------------|----------------|
| protein_coding          | F-box protein 44 [Source:HGNC Symbol;Acc:HGNC:24847]  |             |             |             |             |                |
| -                       | 93                                                    | 188         | 146         | 194         | 208         | 305            |
| 1.291237625             | 2.525682938                                           |             | 2.575456641 |             | 3.05638679  |                |
| 3.624976834             | 4.020919679                                           |             |             |             |             |                |
| ENSG00000073282         | 91.63234756                                           |             | 68.14462679 |             | 39.5247161  |                |
| 39.36680281             | 11.41491828                                           |             | 0           | 66.43389682 |             | 16.92724036    |
|                         | 1.980496404                                           | 0.028659906 |             | 0.146776226 | TP63        | 3              |
|                         | 189631416                                             | 189897279   |             | +           | 7454        | protein_coding |
|                         | tumor protein p63 [Source:HGNC Symbol;Acc:HGNC:15979] |             |             |             |             | P53            |
|                         | 101                                                   | 77          | 34          | 38          | 10          | 0              |
|                         | 0.489471915                                           | 0.283789534 |             | 0.283273698 |             | 0.663530161    |
|                         | 0                                                     |             |             |             |             | 0.08246278     |
| ENSG00000108389         | 1604.926959                                           |             | 1177.043554 |             | 1641.43821  |                |
| 1419.276838             | 948.5797092                                           |             | 834.1719568 |             | 1474.469574 |                |
| 1067.342835             | 0.466199076                                           |             | 0.028684063 |             | 0.146857423 | MTMR4          |
|                         | 17                                                    | 58489529    | 58517905    |             | -           | 7475           |
| protein_coding          | myotubularin related protein 4 [Source:HGNC           |             |             |             |             |                |
| Symbol;Acc:HGNC:7452]   | -                                                     |             | 1769        | 1330        | 1412        | 1370           |
|                         | 967                                                   | 11.58898283 | 8.430763076 |             | 11.75250234 | 831            |
| 10.18407089             | 6.833405407                                           |             | 6.015147692 |             |             |                |
| ENSG00000037897         | 288.5058072                                           |             | 438.0726008 |             | 326.6601536 |                |
| 445.4664528             | 479.4265678                                           |             | 586.5945508 |             | 351.0795205 |                |
| 503.8291905             | -0.52116181                                           |             | 0.028716546 |             | 0.146981189 | METTTL1        |
|                         | 12                                                    | 57768471    | 57772793    |             | -           | 2621           |
| protein_coding          | methyltransferase like 1 [Source:HGNC                 |             |             |             |             |                |
| Symbol;Acc:HGNC:7030]   | -                                                     |             | 318         | 495         | 281         | 430            |
|                         | 680                                                   | 5.941399873 | 8.948796226 |             | 6.670311959 | 420            |
| 9.116192311             | 9.849850291                                           |             | 12.06348837 |             |             |                |
| ENSG00000155363         | 1137.692711                                           |             | 1085.004058 |             | 1136.916834 |                |
| 820.487048              | 966.8435785                                           |             | 849.6994596 |             | 1119.871201 |                |
| 879.0100287             | 0.34975371                                            |             | 0.028726178 |             | 0.146987955 | MOV10          |
|                         | 1                                                     | 112673141   | 112700746   |             | +           | 6509           |
| protein_coding          | Mov10 RISC complex RNA helicase [Source:HGNC          |             |             |             |             |                |
| Symbol;Acc:HGNC:7200]   | -                                                     |             | 1254        | 1226        | 978         | 792            |
|                         | 985                                                   | 9.434349232 | 8.924885219 |             | 9.348273929 | 847            |
| 6.761187092             | 7.998646415                                           |             | 7.036439811 |             |             |                |
| ENSG00000199266         | 1.814501932                                           |             | 0           | 0           | 8.287747959 |                |
| 9.131934625             | 14.66486377                                           |             | 0.604833977 |             |             |                |
| 10.69484878             | -4.095728726                                          |             | 0.028747389 |             | 0.14705395  |                |
| SNORA60 20              | 38449370                                              |             | 38449503    |             | +           | 134            |
|                         | "small nucleolar RNA, H/ACA box 60 [Source:HGNC       |             |             |             |             | snoRNA         |
| Symbol;Acc:HGNC:32654]" | -                                                     |             | 2           | 0           | 0           | 8              |
|                         | 17                                                    | 0.730893132 | 0           | 0           | 3.317395355 | 8              |
| 3.669716789             | 5.898955787                                           |             |             |             |             |                |
| ENSG00000187193         | 169.6559306                                           |             | 180.5390112 |             | 204.5985304 |                |
| 342.9055718             | 301.3538426                                           |             | 211.3465661 |             | 184.9311574 |                |
| 285.2019935             | -0.624701395                                          |             | 0.028787218 |             | 0.147215122 | MT1X           |
|                         | 16                                                    | 56682424    | 56684196    |             | +           | 1773           |
| protein_coding          | metallothionein 1X [Source:HGNC Symbol;Acc:HGNC:7405] |             |             |             |             |                |
| -                       | 187                                                   | 204         | 176         | 331         | 264         | 245            |

|                                    |                                            |                                        |             |                 |      |
|------------------------------------|--------------------------------------------|----------------------------------------|-------------|-----------------|------|
| 5.164895684                        | 5.451899891                                | 6.176049652                            | 10.37364309 |                 |      |
| 9.152559302                        | 6.425225391                                |                                        |             |                 |      |
| ENSG00000110768                    | 1596.7617                                  | 1363.777531                            | 1262.465932 |                 |      |
| 1711.419954                        | 1696.256857                                | 1935.762018                            | 1407.668388 |                 |      |
| 1781.146276                        | -0.339312444                               | 0.028817442                            | 0.147327092 | GTF2H1          |      |
| 11                                 | 18322295                                   | 18367044                               | + 6939      |                 |      |
| protein_coding                     | general transcription factor IIH subunit 1 |                                        |             |                 |      |
| [Source:HGNC Symbol;Acc:HGNC:4655] | -                                          |                                        | 1760 1541   | 1086            |      |
| 1652                               | 1486 2244                                  | 12.420654                              | 10.52282122 |                 |      |
| 9.737327664                        | 13.22894464                                | 13.16343648                            | 15.03685401 |                 |      |
| ENSG00000273748                    | 222.2764867                                | 177.8840258                            | 265.0480962 |                 |      |
| 163.6830222                        | 134.6960357                                | 115.5936321                            | 221.7362029 |                 |      |
| 137.9908967                        | 0.683834433                                | 0.02885283                             | 0.147458706 |                 |      |
| AL592183.1                         | GL000219.1                                 | 54224 83311                            | - 372       |                 |      |
| protein_coding                     | -                                          | 245 201                                | 228 158     | 118             |      |
| 134                                | 32.25164182                                | 25.60233397                            | 38.1328051  |                 |      |
| 23.60077099                        | 19.49783665                                | 16.74915403                            |             |                 |      |
| ENSG00000185532                    | 13.60876449                                | 16.81490791                            | 48.8246493  |                 |      |
| 7.251779464                        | 0                                          | 6.901112362                            | 26.41610723 | 4.717630609     |      |
| 2.46191092                         | 0.028859859                                | 0.147458706                            | PRKG1       | 10              |      |
| 50990891                           | 52298350                                   | +                                      | 12831       | protein_coding  |      |
| protein_kinase                     | cGMP-dependent 1 [Source:HGNC              |                                        |             |                 |      |
| Symbol;Acc:HGNC:9414]              | -                                          | 15 19                                  | 42 7        | 0               |      |
| 8                                  | 0.057247884                                | 0.07016484                             | 0.20365526  |                 |      |
| 0.030314442                        | 0                                          | 0.02899082                             |             |                 |      |
| ENSG00000233912                    | 2.721752898                                | 9.734946684                            | 8.137441549 | 0               |      |
| 0                                  | 0                                          | 6.864713711                            | 0           | 5.211448159     |      |
| 0.028872919                        | 1                                          | AC026202.2                             | 3           | 5156905 5187329 | -    |
| 672                                | antisense                                  | "novel transcript, antisense to ARL8B" |             |                 |      |
| -                                  | 3 11                                       | 7 0                                    | 0 0         |                 |      |
| 0.218615356                        | 0.775621525                                | 0.648090438                            | 0 0         | 0               |      |
| ENSG00000125538                    | 29.03203091                                | 52.21471403                            | 63.93704074 |                 |      |
| 52.83439324                        | 83.32890346                                | 195.8190633                            | 48.39459523 |                 |      |
| 110.6607867                        | -1.200048213                               | 0.028920904                            | 0.147727946 | IL1B            |      |
| 2                                  | 112829751                                  | 112836903                              | - 3096      |                 |      |
| protein_coding                     | interleukin 1 beta [Source:HGNC            |                                        |             |                 |      |
| -                                  | 32 59                                      | 55 51                                  | 73 227      |                 |      |
| 0.506148215                        | 0.902978688                                | 1.105270514                            | 0.915337527 |                 |      |
| 1.449336629                        | 3.409227032                                |                                        |             |                 |      |
| ENSG00000008516                    | 0.907250966                                | 17.69990306                            | 3.48747495  | 0               |      |
| 0                                  | 0                                          | 7.364876326                            | 0           | 5.316963827     |      |
| 0.028951299                        | 1                                          | MMP25                                  | 16 3046681  | 3060726 +       | 4126 |
| protein_coding                     | matrix metalloproteinase 25 [Source:HGNC   |                                        |             |                 |      |
| Symbol;Acc:HGNC:14246]             | -                                          | 1 20                                   | 3 0         | 0               |      |
| 0                                  | 0.011868599                                | 0.229682133                            | 0.045237529 | 0               |      |
| 0                                  | 0                                          |                                        |             |                 |      |
| ENSG00000143669                    | 825.598379                                 | 678.7912824                            | 652.1578156 |                 |      |
| 631.9407819                        | 518.23729                                  | 404.5777122                            | 718.849159  |                 |      |
| 518.251928                         | 0.473520684                                | 0.028967927                            | 0.147899986 | LYST            |      |
| 1                                  | 235661041                                  | 235883640                              | - 19614     |                 |      |

|                        |                                                     |             |             |             |      |        |
|------------------------|-----------------------------------------------------|-------------|-------------|-------------|------|--------|
| protein_coding         | lysosomal trafficking regulator [Source:HGNC        |             |             |             |      |        |
| Symbol;Acc:HGNC:1968]  | -                                                   | 910         | 767         | 561         | 610  | 454    |
| 469                    | 2.271976866                                         | 1.852915583 | 1.779522719 |             |      |        |
| 1.728127207            | 1.422777675                                         | 1.111828212 |             |             |      |        |
| ENSG00000179271        | 2360.667013                                         | 3314.306848 | 3018.990815 |             |      |        |
| 3073.718524            | 3877.64774                                          | 4268.337996 | 2897.988226 |             |      |        |
| 3739.90142             | -0.368138642                                        | 0.028979911 | 0.147899986 |             |      |        |
| GADD45GIP1             | 19                                                  | 12953119    | 12957236    | -           |      | 1782   |
| protein_coding         | GADD45G interacting protein 1 [Source:HGNC          |             |             |             |      |        |
| Symbol;Acc:HGNC:29996] | -                                                   | 2602        | 3745        | 2597        | 2967 | 3397   |
| 4948                   | 71.50366063                                         | 99.57964259 | 90.67156182 |             |      |        |
| 92.51707426            | 117.1750661                                         | 129.1079571 |             |             |      |        |
| ENSG00000198792        | 1530.53238                                          | 1656.710927 | 1617.025885 |             |      |        |
| 1328.11161             | 1208.839846                                         | 1325.876213 | 1601.423064 |             |      |        |
| 1287.609223            | 0.314337007                                         | 0.028987863 | 0.147899986 |             |      |        |
| TMEM184B               | 22                                                  | 38219291    | 38273034    | -           |      | 7080   |
| protein_coding         | transmembrane protein 184B [Source:HGNC             |             |             |             |      |        |
| Symbol;Acc:HGNC:1310]  | -                                                   | 1687        | 1872        | 1391        | 1282 | 1059   |
| 1537                   | 11.6683785                                          | 12.52849856 | 12.22364473 |             |      |        |
| 10.06159451            | 9.194117774                                         | 10.09419355 |             |             |      |        |
| ENSG00000112874        | 387.3961625                                         | 340.723134  | 383.6222445 |             |      |        |
| 579.1063887            | 505.6808799                                         | 447.7096645 | 370.5805136 |             |      |        |
| 510.832311             | -0.462885109                                        | 0.028988029 | 0.147899986 |             |      | NUDT12 |
| 5                      | 103548855                                           | 103562793   | -           | 4304        |      |        |
| protein_coding         | nudix hydrolase 12 [Source:HGNC                     |             |             |             |      |        |
| Symbol;Acc:HGNC:18826] | -                                                   | 427         | 385         | 330         | 559  | 443    |
| 4.85829963             | 4.238526548                                         | 4.770331102 | 7.216914977 |             |      |        |
| 6.32672305             | 5.606942641                                         |             |             |             |      |        |
| ENSG00000155463        | 1582.245685                                         | 1798.310151 | 1507.75167  |             |      |        |
| 1938.297054            | 2087.788554                                         | 2044.454537 | 1629.435835 |             |      |        |
| 2023.513382            | -0.312039929                                        | 0.029062784 | 0.148238634 |             |      | OXA1L  |
| 14                     | 22766522                                            | 22773041    | +           | 4497        |      |        |
| protein_coding         | "OXA1L, mitochondrial inner membrane protein        |             |             |             |      |        |
| [Source:HGNC           | Symbol;Acc:HGNC:8526]"                              |             |             |             |      |        |
| 1871                   | 1829                                                | 2370        | 18.99119428 | 21.41052205 |      | 1297   |
| 17.94419314            | 23.1186752                                          | 24.99989462 | 24.50509986 |             |      |        |
| ENSG00000198919        | 761.1835605                                         | 604.4516896 | 385.9472278 |             |      |        |
| 511.7684365            | 362.9944014                                         | 249.3026841 | 583.8608259 |             |      |        |
| 374.6885073            | 0.642213586                                         | 0.029086353 | 0.14828883  |             |      | DZIP3  |
| 3                      | 108589682                                           | 108694846   | +           | 6972        |      |        |
| protein_coding         | DAZ interacting zinc finger protein 3 [Source:HGNC  |             |             |             |      |        |
| Symbol;Acc:HGNC:30938] | -                                                   | 839         | 683         | 332         | 494  | 318    |
| 289                    | 5.892956916                                         | 4.641835719 | 2.962699143 |             |      |        |
| 3.937146854            | 2.803606781                                         | 1.927398348 |             |             |      |        |
| ENSG00000144485        | 137.9021468                                         | 163.7241033 | 183.6736807 |             |      |        |
| 127.4241249            | 67.34801786                                         | 80.22543121 | 161.7666436 |             |      |        |
| 91.66585798            | 0.818146569                                         | 0.029089391 | 0.14828883  |             |      | HES6   |
| 2                      | 238238267                                           | 238240662   | -           | 2037        |      |        |
| protein_coding         | hes family bHLH transcription factor 6 [Source:HGNC |             |             |             |      |        |
| Symbol;Acc:HGNC:18254] | bHLH                                                | 152         | 185         | 158         | 123  | 59     |

|                             |                                       |                          |                              |                |        |
|-----------------------------|---------------------------------------|--------------------------|------------------------------|----------------|--------|
| 93                          | 3.65410685                            | 4.303354664              | 4.825839841                  |                |        |
| 3.355259588                 | 1.780362109                           | 2.122867742              |                              |                |        |
| ENSG00000266412             | 3237.071447                           | 2765.609853              | 3158.489813                  |                |        |
| 3821.687778                 | 4104.804614                           | 3372.056028              | 3053.723704                  |                |        |
| 3766.182807                 | -0.302401198                          | 0.029113614              | 0.148369551                  | NCOA4          |        |
| 10                          | 46005088                              | 46030714                 | -                            | 4079           |        |
| protein_coding              | nuclear receptor coactivator 4        |                          |                              |                |        |
| Symbol;Acc:HGNC:7671]       | -                                     | 3568                     | 3125                         | 2717           | 3689   |
| 3909                        | 42.83510383                           | 36.30134841              | 41.44219784                  |                | 3596   |
| 50.25357859                 | 54.18927467                           | 44.55977438              |                              |                |        |
| ENSG00000173376             | 21.77402318                           | 16.81490791              | 31.38727455                  |                |        |
| 9.323716454                 | 0                                     | 0                        | 23.32540188                  | 3.107905485    |        |
| 2.914526654                 | 0.029131269                           | 0.148391842              | NDNF                         | 4              |        |
| 121035613                   | 121073021                             | -                        | 3556                         | protein_coding | neuron |
| derived neurotrophic factor | [Source:HGNC Symbol;Acc:HGNC:26256]   | -                        |                              |                |        |
| 24                          | 19                                    | 27                       | 9                            | 0              | 0      |
| 0.253173526                 | 0.472398879                           | 0.1406348                | 0                            | 0.330505106    | 0      |
| ENSG00000137207             | 1999.581129                           | 2494.801337              | 2671.405811                  |                |        |
| 2577.489615                 | 3335.439122                           | 3223.682112              | 2388.596092                  |                |        |
| 3045.53695                  | -0.350849445                          | 0.029134765              | 0.148391842                  | YIPF3          |        |
| 6                           | 43511827                              | 43516990                 | -                            | 3053           |        |
| protein_coding              | Yip1 domain family member 3           |                          |                              |                |        |
| Symbol;Acc:HGNC:21023]      | -                                     | 2204                     | 2819                         | 2298           | 2488   |
| 3737                        | 35.35195774                           | 43.75167783              | 46.83063716                  |                | 2922   |
| 45.28304423                 | 58.83025997                           | 56.9150749               |                              |                |        |
| ENSG00000069764             | 0                                     | 0                        | 0                            | 30.19236658    |        |
| 0                           | 10.06412219                           | -5.812113535             | 0.029155968                  |                |        |
| 0.148414363                 | PLA2G10 16                            | 14672545                 | 14694669                     | -              |        |
| 1116                        | protein_coding                        | phospholipase A2 group X |                              |                |        |
| Symbol;Acc:HGNC:9029]       | -                                     | 0                        | 0                            | 0              | 0      |
| 35                          | 0                                     | 0                        | 0                            | 1.45825968     |        |
| ENSG00000272078             | 0                                     | 0                        | 0                            | 30.19236658    |        |
| 0                           | 10.06412219                           | -5.812113535             | 0.029155968                  |                |        |
| 0.148414363                 | AL139423.1                            | 1                        | 10639241                     | 10654333       |        |
| +                           | 7923                                  | antisense                | "novel transcript, antisense |                |        |
| to CASZ1"                   | -                                     | 0                        | 0                            | 0              | 35     |
| 0                           | 0                                     | 0                        | 0                            | 0.205404241    |        |
| ENSG00000116455             | 1571.358673                           | 1763.79534               | 1600.751002                  |                |        |
| 1836.772141                 | 2176.824916                           | 2134.168998              | 1645.301672                  |                |        |
| 2049.255352                 | -0.316595196                          | 0.029166103              | 0.148423244                  | WDR77          |        |
| 1                           | 111439890                             | 111449376                | -                            | 2805           |        |
| protein_coding              | WD repeat domain 77                   |                          |                              |                |        |
| Symbol;Acc:HGNC:29652]      | -                                     | 1732                     | 1993                         | 1377           | 1773   |
| 2474                        | 30.23734852                           | 33.66672518              | 30.5427348                   |                | 1907   |
| 35.12270157                 | 41.78930877                           | 41.01076286              |                              |                |        |
| ENSG00000179041             | 1867.122488                           | 2359.397078              | 1661.200568                  |                |        |
| 2254.267445                 | 2483.886218                           | 2839.807737              | 1962.573378                  |                |        |
| 2525.987133                 | -0.363791603                          | 0.029179817              | 0.148450327                  | RRS1           |        |
| 8                           | 66429028                              | 66430733                 | +                            | 1706           |        |
| protein_coding              | ribosome biogenesis regulator homolog |                          |                              |                |        |
|                             | [Source:HGNC                          |                          |                              |                |        |

|                                                    |                                                   |             |                      |               |      |             |
|----------------------------------------------------|---------------------------------------------------|-------------|----------------------|---------------|------|-------------|
| Symbol;Acc:HGNC:17083]                             | -                                                 | 2058        | 2666                 | 1429          | 2176 | 2176        |
| 3292                                               | 59.07381616                                       | 74.04701555 |                      | 52.11467678   |      |             |
| 70.87481003                                        | 78.40201497                                       | 89.72465928 |                      |               |      |             |
| ENSG00000167447                                    | 825.598379                                        | 746.9359092 |                      | 762.5945223   |      |             |
| 867.1056302                                        | 1259.065486                                       | 972.194204  |                      | 778.3762702   |      |             |
| 1032.78844                                         | -0.407283161                                      | 0.029248976 |                      | 0.148759383   |      | SMG8        |
| 17                                                 | 59209400                                          | 59215247    |                      | + 3752        |      |             |
| protein_coding                                     | "SMG8, nonsense mediated mRNA decay factor        |             |                      |               |      |             |
| [Source:HGNC Symbol;Acc:HGNC:25551]"               | -                                                 | 910         | 844                  |               | 656  |             |
| 837                                                | 1103                                              | 1127        | 11.87701339          | 10.65874464   |      |             |
| 10.87796999                                        | 12.39580318                                       | 18.07007865 |                      | 13.96664532   |      |             |
| ENSG00000158079                                    | 249.4940156                                       | 199.1239095 |                      | 184.8361723   |      |             |
| 157.4672112                                        | 115.2906746                                       | 123.3573835 |                      | 211.1513658   |      |             |
| 132.0384231                                        | 0.678246096                                       | 0.029307114 |                      | 0.149012226   |      | PTPDC1      |
| 9                                                  | 94030794                                          | 94109856    |                      | + 6404        |      |             |
| protein_coding                                     | protein tyrosine phosphatase domain containing 1  |             |                      |               |      |             |
| [Source:HGNC Symbol;Acc:HGNC:30184]                | -                                                 | 275         | 225                  |               | 159  |             |
| 152                                                | 101                                               | 143         | 2.102858519          | 1.664783013   |      |             |
| 1.544730237                                        | 1.318877042                                       | 0.969432133 |                      | 1.038282974   |      |             |
| ENSG00000231845                                    | 6.350756762                                       | 7.964956378 |                      | 5.812458249   |      | 0           |
| 0                                                  | 0                                                 | 6.709390463 | 0                    | 5.180132901   |      |             |
| 0.029370732                                        | 1                                                 | HMGB3P14    | 3                    | 134170487     |      |             |
| 134171085                                          | +                                                 | 599         | processed_pseudogene | high mobility |      |             |
| group box 3 pseudogene 14                          | [Source:HGNC Symbol;Acc:HGNC:39306]               |             |                      |               |      | -           |
| 7                                                  | 9                                                 | 5           | 0                    | 0             | 0    | 0.572268579 |
| 0.711937924                                        | 0.519337913                                       | 0           | 0                    | 0             | 0    |             |
| ENSG00000260645                                    | 4.53625483                                        | 0           | 0                    | 32.11502334   |      |             |
| 9.131934625                                        | 7.763751407                                       | 1.512084943 |                      |               |      |             |
| 16.33690312                                        | -3.398983193                                      | 0.029428324 |                      | 0.149551152   |      |             |
| AL359715.2                                         | 6                                                 | 80466958    | 80469080             | +             | 2123 |             |
| lincRNA                                            | novel transcript                                  |             |                      |               |      | -           |
| 31                                                 | 8                                                 | 9           | 0.1153317            | 0             | 0    |             |
| 0.811378963                                        | 0.231626024                                       | 0.197116752 |                      |               |      |             |
| ENSG00000279794                                    | 0.907250966                                       | 8.849951531 |                      | 2.3249833     |      |             |
| 6.215810969                                        | 14.83939377                                       | 52.62098176 |                      | 4.027395266   |      |             |
| 24.55872883                                        | -2.599465666                                      | 0.029430016 |                      | 0.149551152   |      |             |
| AC024580.1                                         | 19                                                | 56149817    | 56150490             | +             | 674  |             |
| TEC                                                | TEC                                               | -           | 1                    | 10            | 2    | 6           |
| 61                                                 | 0.072655549                                       | 0.703018161 |                      | 0.184619234   |      | 13          |
| 0.494656132                                        | 1.185579868                                       | 4.208244424 |                      |               |      |             |
| ENSG00000049759                                    | 1121.362194                                       | 900.9250659 |                      | 1078.792251   |      |             |
| 1371.622287                                        | 1208.839846                                       | 1383.673029 |                      | 1033.69317    |      |             |
| 1321.378387                                        | -0.354900808                                      | 0.029466578 |                      | 0.149693942   |      | NEDD4L      |
| 18                                                 | 58044367                                          | 58401540    |                      | + 17455       |      |             |
| protein_coding                                     | "neural precursor cell expressed, developmentally |             |                      |               |      |             |
| down-regulated 4-like, E3 ubiquitin protein ligase | [Source:HGNC                                      |             |                      |               |      |             |
| Symbol;Acc:HGNC:7728]"                             | -                                                 | 1236        | 1018                 | 928           | 1324 | 1059        |
| 1604                                               | 3.467586481                                       | 2.763467527 |                      | 3.307767453   |      |             |
| 4.214831097                                        | 3.729266906                                       | 4.272829161 |                      |               |      |             |
| ENSG00000221914                                    | 2358.852512                                       | 2413.381783 |                      | 2524.931864   |      |             |

|                                               |                                                  |                |                           |                |             |
|-----------------------------------------------|--------------------------------------------------|----------------|---------------------------|----------------|-------------|
| 2988.769108                                   | 2975.869196                                      | 2863.098991    | 2432.388719               |                |             |
| 2942.579098                                   | -0.274792633                                     | 0.029498348    | 0.149721203               |                |             |
| PPP2R2A 8                                     | 26291491                                         | 26372680       | + 7865                    |                |             |
| protein_coding                                | protein phosphatase 2 regulatory subunit Balpha  |                |                           |                |             |
| [Source:HGNC Symbol;Acc:HGNC:9304]            | -                                                | 2600           | 2727                      | 2172           |             |
| 2885                                          | 2607                                             | 3319           | 16.1883768                | 16.42906515    |             |
| 17.18177156                                   | 20.382579                                        | 20.37462689    | 19.62183157               |                |             |
| ENSG00000179151                               | 1084.164904                                      | 1394.752361    | 1243.866065               |                |             |
| 1277.349154                                   | 1598.088559                                      | 2122.95469     | 1240.927777               |                |             |
| 1666.130801                                   | -0.425598038                                     | 0.029505016    | 0.149721203               | EDC3           |             |
| 15                                            | 74630558                                         | 74696292       | - 5103                    |                |             |
| protein_coding                                | enhancer of mRNA decapping 3 [Source:HGNC        |                |                           |                |             |
| Symbol;Acc:HGNC:26114]                        | -                                                | 1195           | 1576                      | 1070           | 1233        |
| 2461                                          | 11.46755998                                      | 14.633799      | 13.04562997               | 1400           |             |
| 13.42608993                                   | 16.86358195                                      | 22.42420544    |                           |                |             |
| ENSG00000152495                               | 625.0959156                                      | 501.7922518    | 540.5586172               |                |             |
| 517.9842475                                   | 337.8815811                                      | 289.8467192    | 555.8155949               |                |             |
| 381.9041826                                   | 0.542326766                                      | 0.0295079      | 0.149721203               | CAMK4          |             |
| 5                                             | 111223653                                        | 111494886      | + 13910                   |                |             |
| protein_coding                                | calcium/calmodulin dependent protein kinase IV   |                |                           |                |             |
| [Source:HGNC Symbol;Acc:HGNC:1464]            | -                                                | 689            | 567                       | 465            |             |
| 500                                           | 296                                              | 336            | 2.425608889               | 1.931445107    |             |
| 2.079853137                                   | 1.997353422                                      | 1.308012641    | 1.123163976               |                |             |
| ENSG00000145861                               | 106.148363                                       | 113.2793796    | 105.7867401               |                |             |
| 25.89921237                                   | 93.60232991                                      | 17.25278091    | 108.4048276               |                |             |
| 45.5847744                                    | 1.259333623                                      | 0.029509626    | 0.149721203               |                |             |
| C1QTNF2 5                                     | 160347751                                        | 160370641      | - 2414                    |                |             |
| protein_coding                                | C1q and TNF related 2 [Source:HGNC               |                |                           |                |             |
| Symbol;Acc:HGNC:14325]                        | -                                                | 117            | 128                       | 91             | 25          |
| 20                                            | 2.373434656                                      | 2.512459933    | 2.34536788                | 82             |             |
| 0.57545953                                    | 2.087968521                                      | 0.385233235    |                           |                |             |
| ENSG00000205726                               | 1126.8057                                        | 810.6555603    | 1017.180194               |                |             |
| 868.1415987                                   | 569.6044223                                      | 725.4794371    | 984.8804846               |                |             |
| 721.0751527                                   | 0.449103565                                      | 0.029517382    | 0.149721203               | ITSN1          |             |
| 21                                            | 33642400                                         | 33899861       | + 21748                   |                |             |
| protein_coding                                | intersectin 1 [Source:HGNC Symbol;Acc:HGNC:6183] |                |                           |                |             |
| -                                             | 1242                                             | 916            | 875                       | 838            | 499         |
| 2.796603875                                   | 1.995733697                                      | 2.503200145    | 2.141098947               |                |             |
| 1.410355451                                   | 1.798074532                                      |                |                           |                |             |
| ENSG00000141965                               | 144.2529036                                      | 157.5291373    | 115.0866733               |                |             |
| 269.3518087                                   | 144.9694622                                      | 279.4950507    | 138.9562381               |                |             |
| 231.2721072                                   | -0.734975787                                     | 0.029522729    | 0.149721203               | FEM1A          |             |
| 19                                            | 4791681                                          | 4801273        | + 9593                    | protein_coding | fem-1       |
| homolog A [Source:HGNC Symbol;Acc:HGNC:16934] | -                                                | 159            | 178                       |                |             |
| 99                                            | 260                                              | 127            | 324                       | 0.811654804    | 0.879208744 |
| 0.642077715                                   | 1.506020721                                      | 0.813760559    | 1.570440851               |                |             |
| ENSG00000171049                               | 6.350756762                                      | 3.539980612    | 10.46242485               | 0              |             |
| 0                                             | 0                                                | 6.784387408    | 0                         | 5.191974766    |             |
| 0.029527962                                   | 1                                                | FPR2           | 19                        | 51752026       | 51770526    |
| +                                             | 3700                                             | protein_coding | formyl peptide receptor 2 |                |             |

|                                                                                                                  |                                                                |             |                                  |                     |
|------------------------------------------------------------------------------------------------------------------|----------------------------------------------------------------|-------------|----------------------------------|---------------------|
| [Source:HGNC Symbol;Acc:HGNC:3827]                                                                               | -                                                              | 7           | 4                                | 9                   |
| 0                                                                                                                | 0                                                              | 0           | 0.092645643                      | 0.051225323         |
| 0.151337875                                                                                                      | 0                                                              | 0           | 0                                |                     |
| ENSG00000183134                                                                                                  | 6.350756762                                                    | 2.654985459 | 0                                | 8.287747959         |
|                                                                                                                  | 46.80116496                                                    | 9.489029498 | 3.001914074                      | 21.5259808          |
|                                                                                                                  | -2.80883845                                                    | 0.029552095 | 0.149827172                      | PTGDR2 11           |
|                                                                                                                  | 60850940                                                       | 60855971    | -                                | 2895 protein_coding |
|                                                                                                                  | prostaglandin D2 receptor 2 [Source:HGNC Symbol;Acc:HGNC:4502] |             |                                  |                     |
|                                                                                                                  | -                                                              | 7           | 3                                | 0                   |
| 0.118407212                                                                                                      | 0.049101994                                                    | 0           | 0.153551288                      | 0.870527808         |
|                                                                                                                  | 0.176675014                                                    |             |                                  |                     |
| ENSG00000134308                                                                                                  | 9011.723845                                                    | 8195.940113 | 11723.72829                      |                     |
| 8385.128998                                                                                                      | 7913.962845                                                    | 6499.122567 | 9643.797416                      |                     |
| 7599.404803                                                                                                      | 0.343656401                                                    | 0.029566642 | 0.149857973                      | YWHAQ               |
|                                                                                                                  | 2                                                              | 9583972     | 9631014                          | -                   |
|                                                                                                                  |                                                                |             | 2713                             | protein_coding      |
| tyrosine 3-monooxygenase/tryptophan 5-monooxygenase activation protein theta [Source:HGNC Symbol;Acc:HGNC:12854] |                                                                |             |                                  |                     |
|                                                                                                                  | 10085                                                          | 8094        | 6933                             | 7534                |
|                                                                                                                  |                                                                |             |                                  | 179.291345          |
|                                                                                                                  |                                                                |             |                                  | 161.7463657         |
|                                                                                                                  |                                                                |             |                                  | 231.2772717         |
|                                                                                                                  |                                                                |             |                                  | 165.7774481         |
|                                                                                                                  |                                                                |             |                                  | 157.0792311         |
|                                                                                                                  |                                                                |             |                                  | 129.1239611         |
| ENSG00000170396                                                                                                  | 362.9003864                                                    | 234.5237156 | 179.0237141                      |                     |
| 483.7972871                                                                                                      | 325.325171                                                     | 400.264517  | 258.8159387                      |                     |
| 403.1289917                                                                                                      | -0.637429032                                                   | 0.029588557 | 0.149926093                      |                     |
| ZNF804A 2                                                                                                        | 184598366                                                      | 184939492   | +                                | 4694                |
| protein_coding zinc finger protein 804A [Source:HGNC Symbol;Acc:HGNC:21711]                                      |                                                                |             |                                  |                     |
|                                                                                                                  | -                                                              | 400         | 265                              | 154                 |
|                                                                                                                  | 464                                                            | 4.172973143 | 2.675033527                      | 2.041194936         |
| 5.528226634                                                                                                      | 3.732064449                                                    | 4.59627403  |                                  |                     |
| ENSG00000170903                                                                                                  | 882.7551899                                                    | 882.3401677 | 734.6947227                      |                     |
| 976.9182907                                                                                                      | 1167.74614                                                     | 1088.650475 | 833.2633601                      |                     |
| 1077.771635                                                                                                      | -0.370195906                                                   | 0.029604393 | 0.149963375                      |                     |
| MSANTD4 11                                                                                                       | 105995623                                                      | 106022403   | -                                | 5105                |
| protein_coding Myb/SANT DNA binding domain containing 4 with coiled-coils [Source:HGNC Symbol;Acc:HGNC:29383]    |                                                                |             |                                  |                     |
|                                                                                                                  | 632                                                            | 943         | 1023                             | 1262                |
|                                                                                                                  |                                                                |             |                                  | 9.333526769         |
|                                                                                                                  |                                                                |             |                                  | 9.253922387         |
|                                                                                                                  |                                                                |             |                                  | 7.70243742          |
|                                                                                                                  |                                                                |             |                                  | 10.26426817         |
|                                                                                                                  |                                                                |             |                                  | 12.31763264         |
|                                                                                                                  |                                                                |             |                                  | 11.49462021         |
| ENSG00000147394                                                                                                  | 61.69306569                                                    | 77.87957347 | 104.6242485                      |                     |
| 138.8197783                                                                                                      | 125.5641011                                                    | 166.4893357 | 81.39896255                      |                     |
| 143.6244051                                                                                                      | -0.8246533                                                     | 0.029619084 | 0.149994842                      | ZNF185              |
|                                                                                                                  | X                                                              | 152914442   | 152973480                        | +                   |
|                                                                                                                  |                                                                |             |                                  | 4812                |
| protein_coding zinc finger protein 185 with LIM domain [Source:HGNC Symbol;Acc:HGNC:12976]                       |                                                                |             |                                  |                     |
|                                                                                                                  | -                                                              | 68          | 88                               | 90                  |
|                                                                                                                  | 193                                                            | 0.692009374 | 0.866529783                      | 1.163653653         |
| 1.547359492                                                                                                      | 1.405123272                                                    | 1.864930744 |                                  |                     |
| ENSG00000285781                                                                                                  | 0                                                              | 0           | 0                                | 10.27342645         |
| 13.80222472                                                                                                      | 0                                                              | 8.025217059 | -5.48192128                      | 0.029650908         |
|                                                                                                                  | 0.150067145                                                    | AL117340.1  | 10                               | 31362799            |
| 31364049                                                                                                         | -                                                              | 1251        | unprocessed_pseudogene           | putative            |
| UPF0607                                                                                                          | protein                                                        | FLJ37424    | [Source:NCBI gene;Acc:100505502] |                     |
|                                                                                                                  | 0                                                              | 0           | 0                                | 9                   |
|                                                                                                                  | 0                                                              | 0           | 0.442214074                      | 0.594694184         |

|                         |                                             |             |                                     |             |                |       |
|-------------------------|---------------------------------------------|-------------|-------------------------------------|-------------|----------------|-------|
| ENSG00000101236         | 1004.326819                                 | 796.4956378 | 1104.367067                         |             |                |       |
| 734.5016629             | 711.149409                                  | 760.8476379 | 968.3965082                         |             |                |       |
| 735.4995699             | 0.395783496                                 | 0.029655842 | 0.150067145                         | RNF24       |                |       |
| 20                      | 3927309                                     | 4015582     | -                                   | 7668        | protein_coding | ring  |
| finger protein 24       | [Source:HGNC Symbol;Acc:HGNC:13779]         |             |                                     |             | -              | 1107  |
| 900                     | 950                                         | 709         | 623                                 | 882         | 7.069589553    |       |
| 5.561434748             | 7.70811788                                  | 5.137787936 | 4.994054789                         |             |                |       |
| 5.348321417             |                                             |             |                                     |             |                |       |
| ENSG00000108788         | 1103.217175                                 | 1368.202507 | 1236.891115                         |             |                |       |
| 1293.92465              | 1852.641237                                 | 1689.047251 | 1236.103599                         |             |                |       |
| 1611.871046             | -0.382799284                                | 0.029658813 | 0.150067145                         | MLX         |                |       |
| 17                      | 42567068                                    | 42573239    | +                                   | 4259        |                |       |
| protein_coding          | "MLX, MAX dimerization protein [Source:HGNC |             |                                     |             |                |       |
| Symbol;Acc:HGNC:11645]" | bHLH                                        | 1216        | 1546                                | 1064        | 1249           | 1623  |
| 1958                    | 13.98152741                                 | 17.1999938  | 15.54321429                         |             |                |       |
| 16.29546816             | 23.42384793                                 | 21.37647373 |                                     |             |                |       |
| ENSG00000280388         | 13.60876449                                 | 10.61994184 | 0                                   | 0           | 0              |       |
| 0                       | 8.076235442                                 | 0           | 5.451072843                         | 0.029724761 |                |       |
| 0.150352417             | AC006330.1                                  | 7           | 76043977                            |             |                |       |
| 76045963                | -                                           | 1987        | TEC                                 | TEC         | -              | 15 12 |
| 0                       | 0                                           | 0           | 0                                   | 0.369676697 | 0.286160588    |       |
| 0                       | 0                                           | 0           | 0                                   |             |                |       |
| ENSG00000275074         | 153.3254133                                 | 164.6090985 | 115.0866733                         |             |                |       |
| 83.91344809             | 77.62144432                                 | 89.71446071 | 144.340395                          |             |                |       |
| 83.74978437             | 0.786104072                                 | 0.029741195 | 0.150352417                         | NUDT18      |                |       |
| 8                       | 22106872                                    | 22109419    | -                                   | 1756        |                |       |
| protein_coding          | nudix hydrolase                             | 18          | [Source:HGNC Symbol;Acc:HGNC:26194] |             |                |       |
| -                       | 169                                         | 186         | 99                                  | 81          | 68             | 104   |
| 4.712928777             | 5.018973163                                 | 3.507660318 | 2.563141315                         |             |                |       |
| 2.380300355             | 2.753847241                                 |             |                                     |             |                |       |
| ENSG00000061337         | 435.4804637                                 | 317.71326   | 291.7854041                         |             |                |       |
| 215.4814469             | 196.3365944                                 | 281.2203288 | 348.3263759                         |             |                |       |
| 231.01279               | 0.591435079                                 | 0.029752524 | 0.150352417                         | LZTS1       |                |       |
| 8                       | 20246165                                    | 20303963    | -                                   | 5706        |                |       |
| protein_coding          | leucine zipper tumor suppressor             | 1           | [Source:HGNC                        |             |                |       |
| Symbol;Acc:HGNC:13861]  | -                                           | 480         | 359                                 | 251         | 208            | 172   |
| 326                     | 4.119439733                                 | 2.981186336 | 2.73683617                          |             |                |       |
| 2.025553                | 1.852866118                                 | 2.656543005 |                                     |             |                |       |
| ENSG00000035928         | 1815.409183                                 | 1564.671431 | 1628.650801                         |             |                |       |
| 1530.125467             | 1180.30255                                  | 1212.870498 | 1669.577138                         |             |                |       |
| 1307.766172             | 0.352498434                                 | 0.029753943 | 0.150352417                         | RFC1        |                |       |
| 4                       | 39287456                                    | 39366375    | -                                   | 6719        |                |       |
| protein_coding          | replication factor C subunit                | 1           | [Source:HGNC                        |             |                |       |
| Symbol;Acc:HGNC:9969]   | -                                           | 2001        | 1768                                | 1401        | 1477           | 1034  |
| 1406                    | 14.58381448                                 | 12.46820862 | 12.97299769                         |             |                |       |
| 12.21484324             | 9.459392757                                 | 9.729974402 |                                     |             |                |       |
| ENSG00000171109         | 1463.395808                                 | 1250.498151 | 1213.641282                         |             |                |       |
| 1097.090636             | 1110.671549                                 | 742.732218  | 1309.178414                         |             |                |       |
| 983.4981343             | 0.413962045                                 | 0.029757692 | 0.150352417                         | MFN1        |                |       |
| 3                       | 179347692                                   | 179394931   | +                                   | 5957        |                |       |



|                                     |                                                      |      |            |              |             |     |                           |
|-------------------------------------|------------------------------------------------------|------|------------|--------------|-------------|-----|---------------------------|
| protein_coding                      | mitofusin 1 [Source:HGNC Symbol;Acc:HGNC:18262] -    |      |            |              |             |     |                           |
|                                     | 1613                                                 | 1413 | 1044       | 1059         | 973         | 861 | 13.25975351               |
|                                     | 11.239345                                            |      | 10.9038469 |              | 9.878258882 |     | 10.03997428               |
|                                     | 6.720577126                                          |      |            |              |             |     |                           |
| ENSG00000179195                     | 1769.139384                                          |      |            | 1657.595922  |             |     | 1691.425351               |
|                                     | 1487.650759                                          |      |            | 1400.610473  |             |     | 1185.266048               |
|                                     | 1357.842427                                          |      |            | 0.329913378  |             |     | 0.029772695               |
|                                     | 12                                                   |      |            | 123971845    |             |     | 0.150354502               |
|                                     |                                                      |      |            | 124015439    |             |     | + 6340                    |
| protein_coding                      | zinc finger protein 664 [Source:HGNC                 |      |            |              |             |     |                           |
| Symbol;Acc:HGNC:25406]              | zf-C2H2                                              | 1950 | 1873       | 1455         | 1436        |     | 1227                      |
|                                     | 1374                                                 |      |            | 15.06170153  |             |     | 13.99828916               |
|                                     | 12.58569566                                          |      |            | 11.89604683  |             |     | 10.07693583               |
| ENSG00000163682                     | 6169.306569                                          |      |            | 8741.982123  |             |     | 9242.971108               |
|                                     | 9059.544488                                          |      |            | 11035.94299  |             |     | 10647.55374               |
|                                     | 10247.68041                                          |      |            | -0.348094687 |             |     | 0.029775104               |
|                                     | 4                                                    |      |            | 39452521     |             |     | 0.150354502               |
|                                     |                                                      |      |            | 39458949     |             |     | - 5022                    |
| protein_coding                      | ribosomal protein L9 [Source:HGNC                    |      |            |              |             |     |                           |
| Symbol;Acc:HGNC:10369]              | -                                                    | 6800 | 9878       | 7951         | 8745        |     | 9668                      |
|                                     | 12343                                                |      |            | 66.30723036  |             |     | 93.20060988               |
|                                     | 96.75984168                                          |      |            | 118.3333865  |             |     | 114.2812649               |
| ENSG00000182934                     | 2723.5674                                            |      |            | 2901.899107  |             |     | 3153.839846               |
|                                     | 2410.698688                                          |      |            | 2526.121416  |             |     | 2226.471376               |
|                                     | 2387.763826                                          |      |            | 0.293506162  |             |     | 0.029801028               |
|                                     | 11                                                   |      |            | 126262919    |             |     | 0.150442462               |
|                                     |                                                      |      |            | 126269144    |             |     | - 4167                    |
| protein_coding                      | SRP receptor subunit alpha [Source:HGNC              |      |            |              |             |     |                           |
| Symbol;Acc:HGNC:11307]              | -                                                    | 3002 | 3279       | 2713         | 2327        |     | 2213                      |
|                                     | 2581                                                 |      |            | 35.27896788  |             |     | 37.28587652               |
|                                     | 31.03022513                                          |      |            | 32.64414315  |             |     | 28.80020123               |
| ENSG00000235286                     | 13.60876449                                          |      |            | 3.539980612  |             |     | 3.48747495                |
|                                     | 0                                                    |      |            | 0            |             |     | 5.217696909               |
|                                     | 0.029808958                                          |      |            | 1            |             |     | AP000925.1 11             |
|                                     | 111672404                                            |      |            | -            |             |     | 1449 processed_pseudogene |
|                                     | (KRT8) pseudogene                                    |      |            | -            |             |     | 15 4 3 0 0                |
|                                     | 0                                                    |      |            | 0.50693416   |             |     | 0.130803103               |
|                                     | 0                                                    |      |            | 0            |             |     | 0.128813006               |
|                                     | 0                                                    |      |            | 0            |             |     | 0                         |
| ENSG00000135390                     | 2138.390527                                          |      |            | 2523.121182  |             |     | 2946.916332               |
|                                     | 1996.31129                                           |      |            | 1983.912797  |             |     | 2063.432596               |
|                                     | 2014.552228                                          |      |            | 0.331625468  |             |     | 0.029840587               |
|                                     | ATP5MC2 12                                           |      |            | 53632726     |             |     | 53677408                  |
|                                     |                                                      |      |            |              |             |     | - 3991                    |
| protein_coding                      | ATP synthase membrane subunit c locus 2 [Source:HGNC |      |            |              |             |     |                           |
| Symbol;Acc:HGNC:842]                | -                                                    | 2357 | 2851       | 2535         | 1927        |     | 1738                      |
|                                     | 2392                                                 |      |            | 28.92054936  |             |     | 33.84869506               |
|                                     | 26.82946611                                          |      |            | 26.76796801  |             |     | 27.86829927               |
| ENSG00000007255                     | 135.1803939                                          |      |            | 324.7932212  |             |     | 251.0981964               |
|                                     | 275.5676196                                          |      |            | 355.0039586  |             |     | 552.951628                |
|                                     | 394.5077354                                          |      |            | -0.736377409 |             |     | 0.029920963               |
|                                     |                                                      |      |            | 0.029920963  |             |     | 0.150961758               |
| TRAPPC6A                            | 19                                                   |      |            | 45162928     |             |     | 45178237                  |
|                                     |                                                      |      |            |              |             |     | - 933                     |
| protein_coding                      | trafficking protein particle complex 6A              |      |            |              |             |     |                           |
| [Source:HGNC Symbol;Acc:HGNC:23069] | -                                                    |      |            |              | 149         | 367 | 216                       |
|                                     | 266                                                  |      |            | 311          |             |     | 641                       |
|                                     |                                                      |      |            | 7.820478172  |             |     | 18.63849585               |

|                                                         |                                                 |             |              |                    |                  |
|---------------------------------------------------------|-------------------------------------------------|-------------|--------------|--------------------|------------------|
| 14.40386207                                             | 15.84207396                                     | 20.48925207 | 31.94533185  |                    |                  |
| ENSG00000274600                                         | 11.79426256                                     | 23.00987398 | 4.6499666    |                    |                  |
| 30.04308635                                             | 41.09370581                                     | 56.93417699 | 13.15136771  |                    |                  |
| 42.69032305                                             | -1.686347428                                    | 0.029938389 | 0.151006603  |                    |                  |
| RIMBP3B 22                                              | 21383374                                        | 21389478    | +            | 6105               |                  |
| protein_coding                                          | RIMS binding protein 3B [Source:HGNC            |             |              |                    |                  |
| Symbol;Acc:HGNC:33891]                                  | -                                               | 13          | 26           | 4                  | 29 36            |
| 66                                                      | 0.104276481                                     | 0.201796728 | 0.040764411  |                    |                  |
| 0.263951645                                             | 0.362463427                                     | 0.502677314 |              |                    |                  |
| ENSG00000268199                                         | 0                                               | 0           | 3.107905485  | 0                  |                  |
| 21.56597613                                             | 0                                               | 8.224627206 | -5.521787322 | 0.030060283        |                  |
| 0.15157595                                              | AC010335.1                                      | 19          | 18441419     |                    |                  |
| 18443597                                                | +                                               | 599         | antisense    | "novel transcript, |                  |
| antisense to ELL"                                       | -                                               | 0           | 0            | 0                  | 3 0              |
| 25                                                      | 0                                               | 0           | 0            | 0.278295687        | 0                |
| 1.94063654                                              |                                                 |             |              |                    |                  |
| ENSG00000267534                                         | 164.2124248                                     | 209.7438513 | 156.9363727  |                    |                  |
| 66.30198367                                             | 113.007691                                      | 127.6705787 | 176.9642163  |                    |                  |
| 102.3267511                                             | 0.789662454                                     | 0.030068405 | 0.15157595   | S1PR2              |                  |
| 19                                                      | 10221433                                        | 10231331    | -            | 3643               |                  |
| protein_coding                                          | sphingosine-1-phosphate receptor 2 [Source:HGNC |             |              |                    |                  |
| Symbol;Acc:HGNC:3169]                                   | -                                               | 181         | 237          | 135                | 64 99            |
| 148                                                     | 2.433033492                                     | 3.082588938 | 2.305586624  |                    |                  |
| 0.97618661                                              | 1.670411163                                     | 1.889006978 |              |                    |                  |
| ENSG00000148296                                         | 1221.1598                                       | 1673.525835 | 1235.728624  |                    |                  |
| 1415.132964                                             | 1800.132613                                     | 2385.19696  | 1376.804753  |                    |                  |
| 1866.820846                                             | -0.439349901                                    | 0.030120322 | 0.151769274  | SURF6              |                  |
| 9                                                       | 133328774                                       | 133336398   | -            | 4626               |                  |
| protein_coding                                          | surfeit 6 [Source:HGNC Symbol;Acc:HGNC:11478]   |             |              |                    |                  |
| 1346                                                    | 1891                                            | 1063        | 1366         | 1577               | 2765 14.24846615 |
| 19.36922933                                             | 14.2966565                                      | 16.40805543 | 20.95431292  |                    |                  |
| 27.79204635                                             |                                                 |             |              |                    |                  |
| ENSG00000173409                                         | 578.8261163                                     | 448.6925426 | 506.8463594  |                    |                  |
| 448.5743583                                             | 335.5985975                                     | 294.1599144 | 511.4550061  |                    |                  |
| 359.4442901                                             | 0.509653684                                     | 0.030123914 | 0.151769274  | ARV1               |                  |
| 1                                                       | 230978981                                       | 231000595   | +            | 1987               |                  |
| protein_coding                                          | "ARV1 homolog, fatty acid homeostasis modulator |             |              |                    |                  |
| [Source:HGNC Symbol;Acc:HGNC:29561]"                    | -                                               | 638         | 507          | 436                |                  |
| 433                                                     | 294                                             | 341         | 15.72358219  | 12.09028485        |                  |
| 13.65197451                                             | 12.10882696                                     | 9.094876864 | 7.979717746  |                    |                  |
| ENSG00000027075                                         | 38.10454057                                     | 19.46989337 | 34.8747495   |                    |                  |
| 6.215810969                                             | 0                                               | 12.93958568 | 30.81639448  | 6.385132216        |                  |
| 2.244961486                                             | 0.030165661                                     | 0.151936324 | PRKCH        | 14                 |                  |
| 61187559                                                | 61550976                                        | +           | 8833         | protein_coding     |                  |
| protein kinase C eta [Source:HGNC Symbol;Acc:HGNC:9403] | -                                               |             |              |                    |                  |
| 42                                                      | 22                                              | 30          | 6            | 0                  | 15 0.232846516   |
| 0.118016                                                | 0.211309913                                     | 0.037744621 | 0            |                    |                  |
| 0.078961256                                             |                                                 |             |              |                    |                  |
| ENSG00000143878                                         | 410.9846876                                     | 515.9521743 | 903.256012   |                    |                  |
| 371.9126897                                             | 425.7764519                                     | 417.5172979 | 610.0642913  |                    |                  |

|                                                 |                                            |               |                |             |
|-------------------------------------------------|--------------------------------------------|---------------|----------------|-------------|
| 405.0688132                                     | 0.588911539                                | 0.030195493   | 0.152043287    | RHOB        |
| 2                                               | 20447074                                   | 20449445      | + 2372         |             |
| protein_coding                                  | ras homolog family member B                | [Source:HGNC  |                |             |
| Symbol;Acc:HGNC:668]                            | -                                          | 453 583       | 777 359        | 373         |
| 484                                             | 9.35216587                                 | 11.64609453   | 20.38042239    |             |
| 8.409918896                                     | 9.665882407                                | 9.487716411   |                |             |
| ENSG00000163513                                 | 3848.558598                                | 3501.040826   | 4623.229292    |             |
| 3558.55178                                      | 3039.792738                                | 2970.928872   | 3990.942905    |             |
| 3189.757797                                     | 0.323022879                                | 0.030229465   | 0.152171034    | TGFBR2      |
| 3                                               | 30606502                                   | 30694142      | + 4704         |             |
| protein_coding                                  | transforming growth factor beta receptor 2 | [Source:HGNC  |                |             |
| Symbol;Acc:HGNC:11773]                          | -                                          | 4242 3956     |                | 3977        |
| 3435                                            | 2663 3444                                  | 44.16030199   | 39.84881496    |             |
| 52.60113613                                     | 40.57620929                                | 34.797754     | 34.04292342    |             |
| ENSG00000119396                                 | 2276.292674                                | 2359.397078   | 2452.857381    |             |
| 2817.834306                                     | 2814.918848                                | 2945.91234    | 2362.849044    |             |
| 2859.555165                                     | -0.275532484                               | 0.030240513   | 0.152183336    | RAB14       |
| 9                                               | 121178137                                  | 121223014     | - 4304         |             |
| protein_coding                                  | "RAB14, member RAS oncogene family         | [Source:HGNC  |                |             |
| Symbol;Acc:HGNC:16524]"                         | -                                          | 2509 2666     | 2110 2720      | 2466        |
| 3415                                            | 28.54677698                                | 29.3504202    | 30.50120795    |             |
| 35.1162947                                      | 35.21828226                                | 36.89346651   |                |             |
| ENSG00000138594                                 | 2161.979052                                | 1749.635418   | 2429.607548    |             |
| 1997.347258                                     | 1541.013968                                | 1168.013267   | 2113.740673    |             |
| 1568.791498                                     | 0.430265415                                | 0.030250908   | 0.152192352    | TMOD3       |
| 15                                              | 51829628                                   | 51947295      | + 10632        |             |
| protein_coding                                  | tropomodulin 3                             | [Source:HGNC  |                |             |
| Symbol;Acc:HGNC:11873]                          | -                                          | 2090 1928     | 1350 1354      |             |
| 10.97583976                                     | 8.810856787                                | 12.2303297    | 10.07636998    |             |
| 7.804878753                                     | 5.921540644                                |               |                |             |
| ENSG00000150783                                 | 1.814501932                                | 0             | 6.974949899    | 6.215810969 |
| 35.38624667                                     | 19.84069804                                | 2.929817277   | 20.48091856    |             |
| -2.848873455                                    | 0.030264904                                | 0.152219475   | TEX12 11       |             |
| 112167372                                       | 112172559                                  | + 1155        | protein_coding |             |
| testis expressed 12                             | [Source:HGNC                               |               |                |             |
| Symbol;Acc:HGNC:11734]                          | -                                          | 2 0 6 6 31 23 | 0.084796259    |             |
| 2                                               | 0                                          | 6             | 31             | 23          |
| 0                                               | 0.323203543                                | 0.288656479   | 1.649783933    |             |
| 0.925927259                                     |                                            |               |                |             |
| ENSG00000171017                                 | 92.53959853                                | 107.0844135   | 105.7867401    |             |
| 110.848629                                      | 152.959905                                 | 288.9840802   | 101.8035841    |             |
| 184.2642047                                     | -0.85907992                                | 0.030296027   | 0.152332696    | LRR8E       |
| 19                                              | 7888505 7902021                            | + 4329        | protein_coding |             |
| leucine rich repeat containing 8 VRAC subunit E | [Source:HGNC                               |               |                |             |
| Symbol;Acc:HGNC:26272]                          | -                                          | 102 121       | 91 107         | 134         |
| 335                                             | 1.15382852                                 | 1.32441541    | 1.30785818     |             |
| 1.373435395                                     | 1.902674829                                | 3.59822436    |                |             |
| ENSG00000100294                                 | 468.1414984                                | 538.0770531   | 512.6588176    |             |
| 557.3510503                                     | 657.499293                                 | 885.0676605   | 506.2924564    |             |
| 699.9726679                                     | -0.468453154                               | 0.03031236    | 0.152354533    | MCAT        |
| 22                                              | 43132206                                   | 43143394      | - 2388         |             |

|                                     |                                                  |             |             |                  |             |      |  |
|-------------------------------------|--------------------------------------------------|-------------|-------------|------------------|-------------|------|--|
| protein_coding                      | malonyl-CoA-acyl carrier protein transacylase    |             |             |                  |             |      |  |
| [Source:HGNC Symbol;Acc:HGNC:29622] | -                                                | 516         | 608         | 441              |             |      |  |
| 538                                 | 576                                              | 1026        | 10.58142268 | 12.06412137      |             |      |  |
| 11.48976414                         | 12.51872205                                      | 14.82639346 | 19.97763419 |                  |             |      |  |
| ENSG00000172315                     | 908.1582169                                      | 1019.514416 | 968.3555444 |                  |             |      |  |
| 1103.306447                         | 1157.472714                                      | 1499.266661 | 965.3427259 |                  |             |      |  |
| 1253.348607                         | -0.377407054                                     | 0.030317596 | 0.152354533 | TP53RK           |             |      |  |
| 20                                  | 46684365                                         | 46689779    | -           | 3520             |             |      |  |
| protein_coding                      | TP53 regulating kinase [Source:HGNC              |             |             |                  |             |      |  |
| Symbol;Acc:HGNC:16197]              | -                                                | 1001        | 1152        | 833              | 1065        | 1014 |  |
| 1738                                | 13.9257982                                       | 15.50730242 | 14.72343639 |                  |             |      |  |
| 16.81198477                         | 17.70690477                                      | 22.95821543 |             |                  |             |      |  |
| ENSG00000186020                     | 335.6828574                                      | 174.3440452 | 235.9858049 |                  |             |      |  |
| 370.8767212                         | 437.1913702                                      | 332.9786715 | 248.6709025 |                  |             |      |  |
| 380.3489209                         | -0.612049191                                     | 0.03033042  | 0.152363834 | ZNF529           |             |      |  |
| 19                                  | 36534774                                         | 36605276    | -           | 8173             |             |      |  |
| protein_coding                      | zinc finger protein 529 [Source:HGNC             |             |             |                  |             |      |  |
| Symbol;Acc:HGNC:29328]              | zf-C2H2                                          | 370         | 197         | 203              | 358         | 383  |  |
| 386                                 | 2.21691432                                       | 1.142118505 | 1.545330533 |                  |             |      |  |
| 2.433960755                         | 2.880478482                                      | 2.196022694 |             |                  |             |      |  |
| ENSG00000182963                     | 2909.553848                                      | 2565.600949 | 2469.132264 |                  |             |      |  |
| 2386.871412                         | 1791.000678                                      | 2133.306359 | 2648.095687 |                  |             |      |  |
| 2103.72615                          | 0.33194283                                       | 0.03035614  | 0.152363834 | GJC1             |             |      |  |
| 17                                  | 44798448                                         | 44830816    | -           | 8660             |             |      |  |
| protein_coding                      | gap junction protein gamma 1 [Source:HGNC        |             |             |                  |             |      |  |
| Symbol;Acc:HGNC:4280]               | -                                                | 3207        | 2899        | 2124             | 2304        | 1569 |  |
| 2473                                | 18.13467394                                      | 15.86195685 | 15.25961115 |                  |             |      |  |
| 14.78347824                         | 11.13659463                                      | 13.27813997 |             |                  |             |      |  |
| ENSG00000198909                     | 1246.562827                                      | 1349.617609 | 1496.126753 |                  |             |      |  |
| 1020.428967                         | 1049.03099                                       | 1161.112155 | 1364.102396 |                  |             |      |  |
| 1076.857371                         | 0.340221227                                      | 0.030357629 | 0.152363834 | MAP3K3           |             |      |  |
| 17                                  | 63622415                                         | 63696303    | +           | 6107             |             |      |  |
| protein_coding                      | mitogen-activated protein kinase kinase kinase 3 |             |             |                  |             |      |  |
| [Source:HGNC Symbol;Acc:HGNC:6855]  | -                                                | 1374        | 1525        | 1287             |             |      |  |
| 985                                 | 919                                              | 1346        | 11.01761256 | 11.83227799      |             |      |  |
| 13.1116538                          | 8.962318097                                      | 9.24985557  | 10.24821335 |                  |             |      |  |
| ENSG00000229994                     | 12.70151352                                      | 10.61994184 | 12.78740815 |                  |             |      |  |
| 68.37392066                         | 25.11282022                                      | 23.29125422 | 12.03628784 |                  |             |      |  |
| 38.92599837                         | -1.693919349                                     | 0.030359963 | 0.152363834 | RPL5P4           |             |      |  |
| 1                                   | 35350722                                         | 35351607    | +           | 886              |             |      |  |
| processed_pseudogene                | ribosomal protein L5 pseudogene 4 [Source:HGNC   |             |             |                  |             |      |  |
| Symbol;Acc:HGNC:36095]              | -                                                | 14          | 12          | 11               | 66          | 22   |  |
| 27                                  | 0.773789794                                      | 0.641761951 | 0.772441876 |                  |             |      |  |
| 4.139255717                         | 1.5262874                                        | 1.416971321 |             |                  |             |      |  |
| ENSG00000279140                     | 9.07250966                                       | 15.0449176  | 0           | 0                | 0           |      |  |
| 0                                   | 8.039142421                                      | 0           | 5.444625809 | 0.030362514      |             |      |  |
| 0.152363834                         | AL590326.1                                       | 14          | 104815449   |                  |             |      |  |
| 104815753                           | -                                                | 305         | TEC         | novel transcript | -           |      |  |
| 10                                  | 17                                               | 0           | 0           | 0                | 1.605568519 |      |  |
| 2.641043308                         | 0                                                | 0           | 0           | 0                |             |      |  |

|                                                                |              |             |             |             |        |
|----------------------------------------------------------------|--------------|-------------|-------------|-------------|--------|
| ENSG0000004864                                                 | 891.8276996  | 938.0948623 | 946.268203  |             |        |
| 710.6743875                                                    | 811.6006898  | 596.9462193 | 925.3969216 |             |        |
| 706.4070989                                                    | 0.390679732  | 0.030400013 | 0.152456473 |             |        |
| SLC25A13                                                       | 7            | 96120220    | 96322147    | -           | 3710   |
| protein_coding solute carrier family 25 member 13              |              |             |             |             |        |
| [Source:HGNC Symbol;Acc:HGNC:10983]                            | -            | 983         | 1060        |             | 814    |
| 686                                                            | 711          | 692         | 12.97502764 | 13.53812116 |        |
| 13.65077605                                                    | 10.27453675  | 11.77993926 | 8.672877315 |             |        |
| ENSG00000156587                                                | 721.264518   | 763.7508171 | 734.6947227 |             |        |
| 743.8253793                                                    | 1296.734717  | 995.4854582 | 739.9033526 |             |        |
| 1012.015185                                                    | -0.451276286 | 0.030408082 | 0.152456473 |             | UBE2L6 |
| 11                                                             | 57551656     | 57568284    | -           | 2197        |        |
| protein_coding ubiquitin conjugating enzyme E2 L6 [Source:HGNC |              |             |             |             |        |
| Symbol;Acc:HGNC:12490]                                         | -            | 795         | 863         | 632         | 718    |
| 1154                                                           | 17.72008314  | 18.61260581 | 17.89756169 |             | 1136   |
| 18.15960639                                                    | 31.78305465  | 24.42343643 |             |             |        |
| ENSG00000100124                                                | 1028.822595  | 1343.422642 | 1328.727956 |             |        |
| 1289.780776                                                    | 1593.522592  | 2066.883152 | 1233.657731 |             |        |
| 1650.062174                                                    | -0.420341383 | 0.03041383  | 0.152456473 |             |        |
| ANKRD54                                                        | 22           | 37830855    | 37849327    | -           | 4487   |
| protein_coding ankyrin repeat domain 54 [Source:HGNC           |              |             |             |             |        |
| Symbol;Acc:HGNC:25185]                                         | -            | 1134        | 1518        | 1143        | 1245   |
| 2396                                                           | 12.37615297  | 16.03031819 | 15.84882272 |             | 1396   |
| 15.41790359                                                    | 19.12391078  | 24.82914486 |             |             |        |
| ENSG00000078549                                                | 0            | 0           | 2.3249833   | 1.035968495 |        |
| 25.11282022                                                    | 11.21430759  | 0.774994433 |             |             |        |
| 12.45436543                                                    | -4.113622408 | 0.03041545  | 0.152456473 |             |        |
| ADCYAP1R1                                                      | 7            | 31052461    | 31111479    | +           | 6832   |
| protein_coding ADCYAP receptor type I [Source:HGNC             |              |             |             |             |        |
| Symbol;Acc:HGNC:242]                                           | -            | 0           | 0           | 2           | 1      |
| 13                                                             | 0            | 0           | 0.018213314 | 0.008133251 | 22     |
| 0.197934812                                                    | 0.08847621   |             |             |             |        |
| ENSG00000281392                                                | 24.49577608  | 25.66485944 | 20.9248497  |             |        |
| 55.94229872                                                    | 39.95221399  | 76.77487503 | 23.69516174 |             |        |
| 57.55646258                                                    | -1.28111915  | 0.030444468 | 0.15251722  |             |        |
| LINC00506                                                      | 3            | 87089129    | 87157069    | +           | 5011   |
| lincRNA long intergenic non-protein coding RNA 506             |              |             |             |             |        |
| [Source:NCBI gene;Acc:100846978]                               | -            | 27          | 29          |             | 18     |
| 54                                                             | 35           | 89          | 0.26385665  | 0.274220574 |        |
| 0.223488381                                                    | 0.598799461  | 0.429329768 | 0.825841346 |             |        |
| ENSG00000232956                                                | 436.3877146  | 625.6915733 | 430.1219105 |             |        |
| 562.5308927                                                    | 660.9237685  | 906.6336366 | 497.4003995 |             |        |
| 710.0294326                                                    | -0.513453561 | 0.030447708 | 0.15251722  |             | SNHG15 |
| 7                                                              | 44983023     | 44986961    | -           | 3647        |        |
| lincRNA small nucleolar RNA host gene 15 [Source:HGNC          |              |             |             |             |        |
| Symbol;Acc:HGNC:27797]                                         | -            | 481         | 707         | 370         | 543    |
| 1051                                                           | 6.458594176  | 9.185654184 | 6.312084547 |             | 579    |
| 8.273249275                                                    | 9.758659405  | 13.39978934 |             |             |        |
| ENSG00000177548                                                | 818.3403713  | 906.2350368 | 685.8700734 |             |        |
| 895.0767796                                                    | 1028.484137  | 1307.760793 | 803.4818272 |             |        |

|                 |                                                                                       |             |             |        |
|-----------------|---------------------------------------------------------------------------------------|-------------|-------------|--------|
| 1077.107236     | -0.422643245                                                                          | 0.030453436 | 0.15251722  | RABEP2 |
| 16              | 28904421                                                                              | 28936526    | - 4566      |        |
| protein_coding  | "rabaptin, RAB GTPase binding effector protein 2 [Source:HGNC Symbol;Acc:HGNC:24817]" |             |             |        |
| 864             | 901 1516                                                                              | 9.673849218 | 10.62650596 | 590    |
| 8.039387294     | 10.51453035                                                                           | 12.12931414 | 15.43811644 |        |
| ENSG00000272886 | 987.089051                                                                            | 958.4497508 | 968.3555444 |        |
| 1273.20528      | 1154.048238                                                                           | 1229.26064  | 971.2981154 |        |
| 1218.838053     | -0.327675889                                                                          | 0.030472917 | 0.152571591 | DCP1A  |
| 3               | 53283428                                                                              | 53347610    | - 6127      |        |
| protein_coding  | decapping mRNA 1A [Source:HGNC Symbol;Acc:HGNC:18714]                                 |             |             |        |
| -               | 1088 1083                                                                             | 833 1229    | 1011 1425   |        |
| 8.695803123     | 8.375428146                                                                           | 8.458706726 | 11.1459232  |        |
| 10.14263123     | 10.81428976                                                                           |             |             |        |
| ENSG00000186153 | 439.1094675                                                                           | 434.5326202 | 485.9215097 |        |
| 361.5530047     | 278.5240061                                                                           | 336.4292277 | 453.1878658 |        |
| 325.5020795     | 0.47597496                                                                            | 0.030484793 | 0.15258786  | WVOX   |
| 16              | 78099413                                                                              | 79212667    | + 4886      |        |
| protein_coding  | WW domain containing oxidoreductase [Source:HGNC Symbol;Acc:HGNC:12799]               |             |             |        |
| 390             | 4.850880573                                                                           | 4.761617112 | 5.322671526 | 244    |
| 3.969026586     | 3.069613696                                                                           | 3.711437594 |             |        |
| ENSG00000160013 | 2.721752898                                                                           | 23.00987398 | 4.6499666   |        |
| 27.97114936     | 47.94265678                                                                           | 40.54403513 | 10.12719783 |        |
| 38.81928042     | -1.925394856                                                                          | 0.030523252 | 0.152711165 | PTGIR  |
| 19              | 46620468                                                                              | 46625118    | - 3546      |        |
| protein_coding  | prostaglandin I2 receptor [Source:HGNC Symbol;Acc:HGNC:9602]                          |             |             |        |
| 47              | 0.041429645                                                                           | 0.347424993 | 0.070182382 | 42     |
| 0.423094205     | 0.72804449                                                                            | 0.616297129 |             |        |
| ENSG00000095739 | 38.10454057                                                                           | 58.40968011 | 75.56195724 |        |
| 52.83439324     | 164.3748233                                                                           | 146.6486377 | 57.35872597 |        |
| 121.2859514     | -1.083934684                                                                          | 0.030526693 | 0.152711165 | BAMBI  |
| 10              | 28677342                                                                              | 28682939    | + 2314      |        |
| protein_coding  | BMP and activin membrane bound inhibitor [Source:HGNC Symbol;Acc:HGNC:30251]          |             |             |        |
| 170             | 0.888821639                                                                           | 1.351471905 | 1.747659607 | 144    |
| 1.224669396     | 3.825132626                                                                           | 3.415989955 |             |        |
| ENSG00000198467 | 404.6339308                                                                           | 538.0770531 | 459.1842017 |        |
| 263.1359977     | 324.1836792                                                                           | 391.6381266 | 467.2983952 |        |
| 326.3192678     | 0.51699741                                                                            | 0.030640144 | 0.153220806 | TPM2   |
| 9               | 35681992                                                                              | 35690121    | - 3248      |        |
| protein_coding  | tropomyosin 2 [Source:HGNC Symbol;Acc:HGNC:12011]                                     |             |             |        |
| -               | 446 608                                                                               | 395 254     | 284 454     |        |
| 6.724306824     | 8.869803518                                                                           | 7.566376044 | 4.345399797 |        |
| 5.374643709     | 6.499363849                                                                           |             |             |        |
| ENSG00000143507 | 1438.900032                                                                           | 1372.627482 | 1136.916834 |        |
| 1389.233752     | 1717.945201                                                                           | 2061.707318 | 1316.148116 |        |
| 1722.96209      | -0.388427389                                                                          | 0.030645894 | 0.153220806 | DUSP10 |
| 1               | 221701424                                                                             | 221742176   | - 2914      |        |

|                        |                                    |              |      |             |             |                       |
|------------------------|------------------------------------|--------------|------|-------------|-------------|-----------------------|
| protein_coding         | dual specificity phosphatase 10    | [Source:HGNC |      |             |             |                       |
| Symbol;Acc:HGNC:3065]  | -                                  | 1586         | 1551 | 978         | 1341        | 1505                  |
| 2390                   | 26.65276801                        | 25.22020958  |      | 20.8812337  |             |                       |
| 25.57120972            | 31.74638748                        | 38.13637168  |      |             |             |                       |
| ENSG00000168917        | 205.0387183                        | 198.2389143  |      | 262.7231129 |             |                       |
| 152.2873688            | 150.6769213                        | 122.4947444  |      | 222.0002485 |             |                       |
| 141.8196782            | 0.646392056                        | 0.030719645  |      | 0.153546142 |             |                       |
| SLC35G2 3              | 136818647                          | 136855892    |      | +           | 4287        |                       |
| protein_coding         | solute carrier family 35 member G2 | [Source:HGNC |      |             |             |                       |
| Symbol;Acc:HGNC:28480] | -                                  | 226          | 224  | 226         | 147         | 132                   |
| 142                    | 2.581568417                        | 2.475830881  |      | 3.279909058 |             |                       |
| 1.90535496             | 1.8926391                          | 1.540160138  |      |             |             |                       |
| ENSG00000167720        | 176.0066874                        | 174.3440452  |      | 162.748831  |             |                       |
| 213.4095099            | 311.6272691                        | 256.2037964  |      | 171.0331878 |             |                       |
| 260.4135252            | -0.605132493                       | 0.030755161  |      | 0.153670233 |             | SRR                   |
| 17                     | 2303383                            | 2325260      | +    | 3498        |             | protein_coding serine |
| racemase [Source:HGNC  | Symbol;Acc:HGNC:14398]             | -            |      | 194         |             | 197                   |
| 140                    | 206                                | 273          |      | 297         | 2.715880197 | 2.668534745           |
| 2.490090189            | 3.27234782                         | 4.797226257  |      | 3.947913807 |             |                       |
| ENSG00000160785        | 1359.061947                        | 1258.463108  |      | 1159.004175 |             |                       |
| 1449.319924            | 1644.889724                        | 1642.464742  |      | 1258.843077 |             |                       |
| 1578.891464            | -0.326397159                       | 0.030761846  |      | 0.153670233 |             |                       |
| SLC25A44               | 1                                  | 156193932    |      | 156212796   | +           | 7293                  |
| protein_coding         | solute carrier family 25 member 44 | [Source:HGNC |      |             |             |                       |
| Symbol;Acc:HGNC:29036] | -                                  |              |      | 1498        | 1422        | 997                   |
| 1399                   | 1441                               | 1904         |      | 10.05852462 | 9.238890581 |                       |
| 8.505420535            | 10.65917383                        | 12.14521277  |      | 12.13924701 |             |                       |
| ENSG00000198208        | 45.3625483                         | 62.83465587  |      | 22.08734135 |             |                       |
| 22.79130689            | 3.424475485                        | 12.07694663  |      | 43.42818184 |             |                       |
| 12.764243              | 1.764955209                        | 0.030785875  |      | 0.153746852 |             |                       |
| RPS6KL1 14             | 74903954                           | 74923396     |      | -           | 7617        |                       |
| protein_coding         | ribosomal protein S6 kinase like 1 | [Source:HGNC |      |             |             |                       |
| Symbol;Acc:HGNC:20222] | -                                  | 50           | 71   | 19          | 22          | 3                     |
| 14                     | 0.321450964                        | 0.441672983  |      | 0.155194559 |             |                       |
| 0.160491032            | 0.024209435                        | 0.085462403  |      |             |             |                       |
| ENSG00000103966        | 3030.218226                        | 3427.586228  |      | 3890.859552 |             |                       |
| 3067.502713            | 2668.807894                        | 2576.702828  |      | 3449.554669 |             |                       |
| 2771.004479            | 0.315797345                        | 0.030805716  |      | 0.153802515 |             | EHD4                  |
| 15                     | 41895939                           | 41972578     |      | -           | 7879        |                       |
| protein_coding         | EH domain containing 4             | [Source:HGNC |      |             |             |                       |
| Symbol;Acc:HGNC:3245]  | -                                  | 3340         | 3873 | 3347        | 2961        | 2338                  |
| 2987                   | 20.75888628                        | 23.29178847  |      | 26.42965283 |             |                       |
| 20.88234904            | 18.23982917                        | 17.62767928  |      |             |             |                       |
| ENSG00000164038        | 494.4517765                        | 524.8021258  |      | 454.5342351 |             |                       |
| 510.732468             | 785.3463778                        | 739.2816618  |      | 491.2627125 |             |                       |
| 678.4535025            | -0.465141161                       | 0.030818319  |      | 0.1538126   |             | SLC9B2                |
| 4                      | 103019868                          | 103085829    |      | -           | 5374        |                       |
| protein_coding         | solute carrier family 9 member B2  | [Source:HGNC |      |             |             |                       |
| Symbol;Acc:HGNC:25143] | -                                  | 545          | 593  | 391         | 493         | 688                   |
| 857                    | 4.966237943                        | 5.228576566  |      | 4.526744076 |             |                       |

|                                     |                                                      |             |                      |             |      |        |   |
|-------------------------------------|------------------------------------------------------|-------------|----------------------|-------------|------|--------|---|
| 5.097547729                         | 7.869336859                                          | 7.415051607 |                      |             |      |        |   |
| ENSG00000158163                     | 281.2477995                                          | 162.8391082 | 182.511189           |             |      |        |   |
| 139.8557468                         | 148.3939377                                          | 63.83528935 | 208.8660322          |             |      |        |   |
| 117.3616579                         | 0.836219969                                          | 0.0308263   | 0.1538126            |             |      | DZIP1L |   |
| 3                                   | 138061990                                            | 138115818   | -                    | 5045        |      |        |   |
| protein_coding                      | DAZ interacting zinc finger protein 1 like           |             |                      |             |      |        |   |
| [Source:HGNC Symbol;Acc:HGNC:26551] | -                                                    | 310         | 184                  |             |      | 157    |   |
| 135                                 | 130                                                  | 74          | 3.009048632          | 1.728156596 |      |        |   |
| 1.936178211                         | 1.486909861                                          | 1.583906503 | 0.682026999          |             |      |        |   |
| ENSG00000231991                     | 1132.249206                                          | 1152.263689 | 1677.475451          |             |      |        |   |
| 1158.212777                         | 964.5605948                                          | 795.3531997 | 1320.662782          |             |      |        |   |
| 972.7088573                         | 0.440814171                                          | 0.030833822 | 0.1538126            |             |      |        |   |
| ANXA2P2                             | 9                                                    | 33624274    | 33625293             | +           | 1020 |        |   |
| processed_pseudogene                | annexin A2 pseudogene 2 [Source:HGNC                 |             |                      |             |      |        |   |
| Symbol;Acc:HGNC:539]                | -                                                    | 1248        | 1302                 | 1443        | 1118 | 845    |   |
| 922                                 | 59.91603932                                          | 60.48354718 | 88.01830601          |             |      |        |   |
| 60.90510208                         | 50.92181765                                          | 42.03023008 |                      |             |      |        |   |
| ENSG00000272657                     | 8.165258694                                          | 7.079961225 | 4.6499666            |             |      | 0      |   |
| 0                                   | 0                                                    | 6.631728839 | 0                    | 5.164220403 |      |        |   |
| 0.030857959                         | 1                                                    | AP000317.2  | 21                   | 34073592    |      |        |   |
| 34360033                            | +                                                    | 641         | processed_transcript | novel       |      |        |   |
| transcript                          | -                                                    | 9           | 8                    | 4           | 0    | 0      | 0 |
| 0.687564054                         | 0.591368787                                          | 0.388247626 | 0                    | 0           | 0    |        |   |
| 0                                   |                                                      |             |                      |             |      |        |   |
| ENSG00000125637                     | 649.5916916                                          | 718.6160643 | 676.5701402          |             |      |        |   |
| 719.998104                          | 945.1552337                                          | 1062.771304 | 681.5926321          |             |      |        |   |
| 909.3082138                         | -0.416280481                                         | 0.030876116 | 0.153980156          |             |      | PSD4   |   |
| 2                                   | 113157325                                            | 113209396   | +                    | 13442       |      |        |   |
| protein_coding                      | pleckstrin and Sec7 domain containing 4 [Source:HGNC |             |                      |             |      |        |   |
| Symbol;Acc:HGNC:19096]              | -                                                    | 716         | 812                  | 582         | 695  | 828    |   |
| 1232                                | 2.608421762                                          | 2.862322596 | 2.69380367           |             |      |        |   |
| 2.872982345                         | 3.786289403                                          | 4.261650547 |                      |             |      |        |   |
| ENSG00000127325                     | 22.68127415                                          | 36.28480128 | 23.249833            |             |      |        |   |
| 56.97826722                         | 43.37668947                                          | 96.61557307 | 27.40530281          |             |      |        |   |
| 65.65684325                         | -1.261028951                                         | 0.030892142 | 0.154016659          |             |      | BEST3  |   |
| 12                                  | 69643360                                             | 69699476    | -                    | 6863        |      |        |   |
| protein_coding                      | bestrophin 3 [Source:HGNC Symbol;Acc:HGNC:17105]     |             |                      |             |      |        |   |
| -                                   | 25                                                   | 41          | 20                   | 55          | 38   | 112    |   |
| 0.178383505                         | 0.283071599                                          | 0.181310453 | 0.445308243          |             |      |        |   |
| 0.340343106                         | 0.758813488                                          |             |                      |             |      |        |   |
| ENSG00000183160                     | 1320.050155                                          | 1269.968045 | 1207.828824          |             |      |        |   |
| 1111.594195                         | 1043.323531                                          | 602.1220536 | 1265.949008          |             |      |        |   |
| 919.0132599                         | 0.463360546                                          | 0.030967599 | 0.154349355          |             |      |        |   |
| TMEM119                             | 12                                                   | 108589846   | 108598320            | -           | 3189 |        |   |
| protein_coding                      | transmembrane protein 119 [Source:HGNC               |             |                      |             |      |        |   |
| Symbol;Acc:HGNC:27884]              | -                                                    | 1455        | 1435                 | 1039        | 1073 | 914    |   |
| 698                                 | 22.34277735                                          | 21.32179791 | 20.27065933          |             |      |        |   |
| 18.69636794                         | 17.6172873                                           | 10.17728465 |                      |             |      |        |   |
| ENSG00000116661                     | 1.814501932                                          | 5.309970919 | 6.974949899          |             |      |        |   |
| 24.86324388                         | 37.66923033                                          | 7.763751407 | 4.699807583          |             |      |        |   |



|                 |                       |                        |                        |                |
|-----------------|-----------------------|------------------------|------------------------|----------------|
| 23.4320752      | -2.326120544          | 0.030976792            | 0.154351682            | FBX02          |
| 1               | 11637018              | 11655785               | - 3416                 |                |
| protein_coding  | F-box protein 2       | [Source:HGNC           | Symbol;Acc:HGNC:13581] |                |
| -               | 2 6                   | 6 24                   | 33 9                   |                |
| 0.028670866     | 0.083226155           | 0.109279886            | 0.390396058            |                |
| 0.593804437     | 0.122505522           |                        |                        |                |
| ENSG00000171466 | 592.4348808           | 587.6367817            | 477.7840681            |                |
| 872.2854727     | 671.197195            | 688.3859581            | 552.6185769            |                |
| 743.9562086     | -0.42778085           | 0.030991101            | 0.154379497            | ZNF562         |
| 19              | 9641808 9675086       | - 13007                | protein_coding         | zinc           |
| finger protein  | 562 [Source:HGNC      | Symbol;Acc:HGNC:25950] | zf-C2H2                | 653            |
| 664             | 411 842               | 588 798                | 2.458468933            |                |
| 2.418897023     | 1.965945745           | 3.597054309            | 2.778737653            |                |
| 2.852704382     |                       |                        |                        |                |
| ENSG00000163762 | 9.07250966            | 8.849951531            | 2.3249833              | 0              |
| 0               | 0                     | 6.749148164            | 0                      | 5.191579071    |
| 0.031020184     | 1                     | TM4SF18 3              | 149318498              | 149334414      |
| -               | 4482                  | protein_coding         | transmembrane 4 L      | six family     |
| member 18       | [Source:HGNC          | Symbol;Acc:HGNC:25181] | -                      | 10 10          |
| 2               | 0 0                   | 0                      | 0.109258902            | 0.105719375    |
| 0.02776291      | 0                     | 0                      | 0                      |                |
| ENSG00000174307 | 746.667545            | 994.7345521            | 1033.455077            |                |
| 866.0696617     | 1313.857094           | 1740.805593            | 924.9523913            |                |
| 1306.910783     | -0.499632321          | 0.031050614            | 0.154495369            | PHLDA3         |
| 1               | 201464383             | 201469237              | - 3138                 |                |
| protein_coding  | pleckstrin homology   | like domain            | family A member        | 3              |
| [Source:HGNC    | Symbol;Acc:HGNC:8934] | -                      | 823                    | 1124 889       |
| 836             | 1151 2018             | 12.84326902            | 16.97226534            |                |
| 17.62607722     | 14.80353319           | 22.54601256            | 29.9019314             |                |
| ENSG00000187634 | 40.82629347           | 28.3198449             | 44.1746827             | 0              |
| 10.27342645     | 16.39014186           | 37.77360702            | 8.887856105            |                |
| 2.076454762     | 0.03105345            | 0.154495369            | SAMD11                 | 1              |
| 923928          | 944581 +              | 4166                   | protein_coding         | sterile alpha  |
| motif domain    | containing 11         | [Source:HGNC           | Symbol;Acc:HGNC:28706] | -              |
| 45              | 32 38                 | 0                      | 9                      | 19 0.528958904 |
| 0.363962931     | 0.567506941           | 0                      | 0.1327916              |                |
| 0.212063221     |                       |                        |                        |                |
| ENSG00000133962 | 0                     | 4.424975766            | 0                      | 4.14387398     |
| 7.990442797     | 37.95611799           | 1.474991922            |                        |                |
| 16.69681159     | -3.463192755          | 0.031054017            | 0.154495369            |                |
| CATSPERB        | 14                    | 91580696               | 91780707               | - 5635         |
| protein_coding  | cation channel        | sperm associated       | auxiliary              |                |
| subunit beta    | [Source:HGNC          | Symbol;Acc:HGNC:20500] | -                      | 0              |
| 5               | 0 4                   | 7 44                   | 0                      | 0.042043855    |
| 0               | 0.039443742           | 0.076357461            | 0.363069506            |                |
| ENSG00000267002 | 205.0387183           | 173.45905              | 151.1239145            |                |
| 236.2008168     | 239.7132839           | 339.8797838            | 176.5405609            |                |
| 271.9312949     | -0.623309496          | 0.031056297            | 0.154495369            |                |
| AC060780.1      | 17                    | 43148368               | 43171037               | - 8450         |
| lincRNA         | novel transcript      | -                      | 226                    | 196 130        |

|                                     |                                                        |        |             |             |                      |             |  |
|-------------------------------------|--------------------------------------------------------|--------|-------------|-------------|----------------------|-------------|--|
| 228                                 | 210                                                    | 394    | 1.309725894 | 1.099071138 |                      |             |  |
| 0.957179723                         | 1.499305664                                            |        | 1.527601042 | 2.168056176 |                      |             |  |
| ENSG00000156709                     | 1237.490318                                            |        | 1262.888084 | 1310.128089 |                      |             |  |
| 1041.148337                         | 932.5988236                                            |        | 1058.458109 | 1270.16883  |                      |             |  |
| 1010.73509                          | 0.328970755                                            |        | 0.031058032 | 0.154495369 | AIFM1                |             |  |
| X                                   | 130129362                                              |        | 130165887   | -           | 3306                 |             |  |
| protein_coding                      | apoptosis inducing factor mitochondria associated 1    |        |             |             |                      |             |  |
| [Source:HGNC Symbol;Acc:HGNC:8768]  |                                                        |        | -           | 1364        | 1427                 | 1127        |  |
| 1005                                | 817                                                    | 1227   | 20.20413234 | 20.45255479 |                      |             |  |
| 21.20937708                         | 16.89177376                                            |        | 15.19030757 | 17.25729534 |                      |             |  |
| ENSG00000109705                     | 95.26135143                                            |        | 99.11945715 | 60.44956579 |                      |             |  |
| 27.97114936                         | 33.10326302                                            |        | 56.93417699 | 84.94345812 |                      |             |  |
| 39.33619646                         | 1.107146081                                            |        | 0.031075313 | 0.154526395 | NKX3-2               |             |  |
| 4                                   | 13540830                                               |        | 13545050    | -           | 2801                 |             |  |
| protein_coding                      | NK3 homeobox 2 [Source:HGNC Symbol;Acc:HGNC:951]       |        |             |             |                      |             |  |
| Homeobox                            |                                                        | 105    | 112         | 52          | 27                   | 29          |  |
|                                     |                                                        |        |             |             |                      | 66          |  |
| 1.835713382                         | 1.894660298                                            |        | 1.155040151 | 0.535627294 |                      |             |  |
| 0.636403045                         | 1.095624777                                            |        |             |             |                      |             |  |
| ENSG00000113719                     | 2864.1913                                              |        | 2862.074325 | 3256.139111 |                      |             |  |
| 2496.684073                         | 2623.148221                                            |        | 2159.18553  | 2994.134912 |                      |             |  |
| 2426.339275                         | 0.303478332                                            |        | 0.031081828 | 0.154526395 | ERGIC1               |             |  |
| 5                                   | 172834275                                              |        | 172952685   | +           | 14139                |             |  |
| protein_coding                      | endoplasmic reticulum-golgi intermediate compartment 1 |        |             |             |                      |             |  |
| [Source:HGNC Symbol;Acc:HGNC:29205] |                                                        |        | -           | 3157        | 3234                 | 2801        |  |
| 2410                                | 2298                                                   | 2503   | 10.93413851 | 10.83796544 |                      |             |  |
| 12.32540677                         | 9.47131742                                             |        | 9.990303684 | 8.231389893 |                      |             |  |
| ENSG00000187621                     | 26.31027801                                            |        | 21.23988367 | 18.5998664  | 0                    |             |  |
| 0                                   | 8.626390453                                            |        | 22.05000936 | 2.875463484 |                      |             |  |
| 2.889164327                         | 0.031090477                                            |        | 0.154526395 | TCL6        | 14                   |             |  |
| 95650498                            | 95679833                                               |        | +           | 10566       | processed_transcript |             |  |
| T cell leukemia/lymphoma 6          | [Source:HGNC Symbol;Acc:HGNC:13463]                    |        |             |             |                      |             |  |
| -                                   | 29                                                     | 24     | 16          | 0           | 0                    | 10          |  |
| 0.134405201                         | 0.107628448                                            |        | 0.094214169 | 0           | 0                    |             |  |
| 0.044006863                         |                                                        |        |             |             |                      |             |  |
| ENSG00000165283                     | 3248.865709                                            |        | 3651.490002 | 3436.325317 |                      |             |  |
| 3821.687778                         | 4535.147033                                            |        | 4218.304931 | 3445.560343 |                      |             |  |
| 4191.713247                         | -0.282709107                                           |        | 0.031115686 | 0.154565138 | STOML2               |             |  |
| 9                                   | 35099776                                               |        | 35103195    | -           | 1806                 |             |  |
| protein_coding                      | stomatin like 2 [Source:HGNC Symbol;Acc:HGNC:14559]    |        |             |             |                      |             |  |
| -                                   | 3581                                                   | 4126   | 2956        | 3689        | 3973                 | 4890        |  |
| 97.09911209                         | 108.2524959                                            |        | 101.8341705 | 113.5018533 |                      |             |  |
| 135.2222566                         | 125.8989567                                            |        |             |             |                      |             |  |
| ENSG00000141934                     | 1271.058603                                            |        | 1212.44336  | 1338.027889 |                      |             |  |
| 1089.838857                         | 996.522366                                             |        | 948.0403108 | 1273.843284 |                      |             |  |
| 1011.467178                         | 0.332689488                                            |        | 0.031115747 | 0.154565138 | PLPP2                |             |  |
| 19                                  | 281040                                                 | 291504 | -           | 7059        | protein_coding       |             |  |
| phospholipid phosphatase 2          | [Source:HGNC Symbol;Acc:HGNC:9230]                     |        |             |             |                      | -           |  |
| 1401                                | 1370                                                   | 1151   | 1052        | 873         | 1099                 | 9.719045984 |  |
| 9.196102983                         | 10.14469486                                            |        | 8.281034645 | 7.601834705 |                      |             |  |
| 7.23911588                          |                                                        |        |             |             |                      |             |  |

|                                     |                                                                                                 |             |                |                   |
|-------------------------------------|-------------------------------------------------------------------------------------------------|-------------|----------------|-------------------|
| ENSG0000030582                      | 3381.32435                                                                                      | 4024.957956 | 4268.669338    |                   |
| 3148.308256                         | 3320.599728                                                                                     | 3033.038883 | 3891.650548    |                   |
| 3167.315622                         | 0.297042807                                                                                     | 0.031128412 | 0.154584639    | GRN               |
| 17                                  | 44345086                                                                                        | 44353102    | + 3680         |                   |
| protein_coding                      | granulin precursor [Source:HGNC Symbol;Acc:HGNC:4601]                                           |             |                |                   |
| -                                   | 3727 4548                                                                                       | 3672 3039   | 2909 3516      |                   |
| 49.59526985                         | 58.55973169                                                                                     | 62.08142835 | 45.88755574    |                   |
| 48.58959316                         | 44.42547355                                                                                     |             |                |                   |
| ENSG00000164366                     | 435.4804637                                                                                     | 457.5424942 | 433.6093854    |                   |
| 619.50916                           | 490.8414861                                                                                     | 697.8749876 | 442.2107811    |                   |
| 602.7418779                         | -0.44782185                                                                                     | 0.031165448 | 0.15472512     |                   |
| CCDC127 5                           | 196871 218215                                                                                   | - 9701      | protein_coding |                   |
| coiled-coil domain containing 127   | [Source:HGNC Symbol;Acc:HGNC:30520]                                                             |             |                |                   |
| -                                   | 480 517                                                                                         | 373 598     | 430 809        |                   |
| 2.423000012                         | 2.525227321                                                                                     | 2.392209297 | 3.425285082    |                   |
| 2.724578412                         | 3.877600254                                                                                     |             |                |                   |
| ENSG00000249628                     | 8.165258694                                                                                     | 9.734946684 | 2.3249833      | 0                 |
| 0                                   | 0                                                                                               | 6.741729559 | 0              | 5.190052354       |
| 0.03118639                          | 1                                                                                               | LINC00942   | 12             | 1500525 1504424 + |
| 2210                                | lincRNA long intergenic non-protein coding RNA 942                                              |             |                |                   |
| [Source:HGNC Symbol;Acc:HGNC:48636] | -                                                                                               | 9           | 11             | 2                 |
| 0                                   | 0                                                                                               | 0           | 0.199424687    | 0.235845097       |
| 0.05630469                          | 0                                                                                               | 0           | 0              |                   |
| ENSG00000253540                     | 122.4788804                                                                                     | 96.46447169 | 33.71225785    |                   |
| 130.5320304                         | 272.8165469                                                                                     | 117.3189102 | 84.21853665    |                   |
| 173.5558291                         | -1.036017686                                                                                    | 0.031235686 | 0.155011729    |                   |
| FAM86HP 3                           | 130099092                                                                                       | 130111472   | - 1301         |                   |
| transcribed_unprocessed_pseudogene  | "family with sequence similarity 86 member H, pseudogene [Source:HGNC Symbol;Acc:HGNC:42359]" - |             |                |                   |
| 136                                 | 5.081420736                                                                                     | 3.969864121 | 1.386843796    | 239               |
| 5.381524133                         | 11.29192447                                                                                     | 4.860630749 |                |                   |
| ENSG00000132613                     | 709.4702554                                                                                     | 618.611612  | 759.1070474    |                   |
| 499.3368145                         | 586.7267997                                                                                     | 478.7646701 | 695.7296383    |                   |
| 521.6094281                         | 0.415822675                                                                                     | 0.031240704 | 0.155011729    | MTSS1L            |
| 16                                  | 70661204                                                                                        | 70686066    | - 4999         |                   |
| protein_coding                      | "MTSS1L, I-BAR domain containing [Source:HGNC Symbol;Acc:HGNC:25094]" -                         |             |                |                   |
| 555                                 | 7.660415033                                                                                     | 6.625527789 | 8.127124095    | 514               |
| 5.357669814                         | 6.320149369                                                                                     | 5.162271771 |                |                   |
| ENSG00000177842                     | 113.4063707                                                                                     | 123.8993214 | 95.32431529    |                   |
| 137.7838098                         | 189.4876435                                                                                     | 225.1487908 | 110.8766692    |                   |
| 184.1400814                         | -0.731053433                                                                                    | 0.031267169 | 0.155099536    | ZNF620            |
| 3                                   | 40477131                                                                                        | 40518736    | + 3783         |                   |
| protein_coding                      | zinc finger protein 620 [Source:HGNC Symbol;Acc:HGNC:28742] zf-C2H2                             |             |                |                   |
| 261                                 | 1.618088813                                                                                     | 1.753549925 | 1.348603734    | 166               |
| 1.953562649                         | 2.69723699                                                                                      | 3.208006091 |                |                   |
| ENSG00000159147                     | 1236.583067                                                                                     | 1028.364368 | 932.3183032    |                   |
| 938.5874564                         | 753.3846066                                                                                     | 734.9684666 | 1065.755246    |                   |

|                        |                                                        |             |                |        |
|------------------------|--------------------------------------------------------|-------------|----------------|--------|
| 808.9801765            | 0.398480659                                            | 0.031277245 | 0.155103355    | DONSON |
| 21                     | 33559542                                               | 33588708    | - 3513         |        |
| protein_coding         | downstream neighbor of SON [Source:HGNC                |             |                |        |
| Symbol;Acc:HGNC:2993]  | -                                                      | 1363 1162   | 802 906        | 660    |
| 852                    | 18.99968451                                            | 15.67308248 | 14.20375149    |        |
| 14.33052468            | 11.5481694                                             | 11.27697099 |                |        |
| ENSG00000189306        | 852.815908                                             | 1004.469499 | 877.6811957    |        |
| 1051.508022            | 1146.057795                                            | 1321.563017 | 911.6555342    |        |
| 1173.042945            | -0.363885649                                           | 0.031285475 | 0.155103355    | RRP7A  |
| 22                     | 42509968                                               | 42519802    | - 4082         |        |
| protein_coding         | ribosomal RNA processing 7 homolog A [Source:HGNC      |             |                |        |
| Symbol;Acc:HGNC:24286] | -                                                      | 940 1135    | 755 1015       | 1004   |
| 1532                   | 11.27673921                                            | 13.1749599  | 11.50749508    |        |
| 13.8167241             | 15.11847801                                            | 17.45085794 |                |        |
| ENSG00000176641        | 179.6356913                                            | 161.954113  | 219.7109218    |        |
| 135.7118728            | 34.24475485                                            | 119.0441882 | 187.100242     |        |
| 96.33360531            | 0.953069547                                            | 0.03131227  | 0.155192698    | RNF152 |
| 18                     | 61808063                                               | 61894247    | - 10632        |        |
| protein_coding         | ring finger protein 152 [Source:HGNC                   |             |                |        |
| Symbol;Acc:HGNC:26811] | -                                                      | 198 183     | 189 131        | 30     |
| 138                    | 0.911966543                                            | 0.81557248  | 1.105996322    |        |
| 0.68464962             | 0.17344175                                             | 0.603524822 |                |        |
| ENSG00000104472        | 1542.326642                                            | 1551.396503 | 1624.000835    |        |
| 2095.764265            | 1724.794152                                            | 2040.141342 | 1572.57466     |        |
| 1953.566587            | -0.313477227                                           | 0.031329038 | 0.155232312    | CHRAC1 |
| 8                      | 140511298                                              | 140517137   | + 3301         |        |
| protein_coding         | chromatin accessibility complex subunit 1 [Source:HGNC |             |                |        |
| Symbol;Acc:HGNC:13544] | -                                                      | 1700 1753   | 1397 2023      | 1511   |
| 2365                   | 25.21924499                                            | 25.16302404 | 26.33041647    |        |
| 34.05355073            | 28.13625557                                            | 33.31322199 |                |        |
| ENSG00000106868        | 76.20908114                                            | 51.32971888 | 69.74949899    |        |
| 41.4387398             | 26.25431205                                            | 9.489029498 | 65.76276634    |        |
| 25.72736045            | 1.360535133                                            | 0.031351824 | 0.155301711    | SUSD1  |
| 9                      | 112040785                                              | 112175408   | - 4183         |        |
| protein_coding         | sushi domain containing 1 [Source:HGNC                 |             |                |        |
| Symbol;Acc:HGNC:25413] | -                                                      | 84 58       | 60 40          | 23     |
| 11                     | 0.983377133                                            | 0.657001816 | 0.892421927    |        |
| 0.531354264            | 0.337977144                                            | 0.122274484 |                |        |
| ENSG00000048740        | 145.1601546                                            | 52.21471403 | 29.06229125    |        |
| 22.79130689            | 43.37668947                                            | 2.587917136 | 75.47905328    |        |
| 22.91863783            | 1.732579791                                            | 0.03137693  | 0.155382561    | CELF2  |
| 10                     | 10798397                                               | 11336675    | + 10978        |        |
| protein_coding         | CUGBP Elav-like family member 2 [Source:HGNC           |             |                |        |
| Symbol;Acc:HGNC:2550]  | -                                                      | 160 59      | 25 22          | 38     |
| 3                      | 0.713716011                                            | 0.25465677  | 0.14168492     |        |
| 0.111355455            | 0.212768695                                            | 0.012706591 |                |        |
| ENSG00000118680        | 3255.216466                                            | 3773.619333 | 5247.487308    |        |
| 3210.466366            | 3160.790872                                            | 3158.121545 | 4092.107702    |        |
| 3176.459594            | 0.365009216                                            | 0.031445023 | 0.155676187    | MYL12B |
| 18                     | 3261479 3278431                                        | + 1932      | protein_coding | myosin |

|                                                                 |                                                       |                |                   |
|-----------------------------------------------------------------|-------------------------------------------------------|----------------|-------------------|
| light chain 12B [Source:HGNC                                    | Symbol;Acc:HGNC:29827]                                | -              | 3588              |
| 4264                                                            | 4514 3099                                             | 2769 3661      | 90.94398826       |
| 104.5770808                                                     | 145.3654775                                           | 89.13053181    | 88.09742079       |
| 88.1096802                                                      |                                                       |                |                   |
| ENSG0000005379                                                  | 236.7925021                                           | 321.2532406    | 258.0731463       |
| 136.7478413                                                     | 206.6100209                                           | 187.1926728    | 272.0396297       |
| 176.8501784                                                     | 0.622120136                                           | 0.031489296    | 0.155851751       |
| TSP0AP1 17                                                      | 58301228                                              | 58328760       | - 11354           |
| protein_coding                                                  | TSP0 associated protein 1 [Source:HGNC                |                |                   |
| Symbol;Acc:HGNC:16831]                                          | -                                                     | 261 363        | 222 132 181       |
| 217                                                             | 1.12569387                                            | 1.514900734    | 1.216496689       |
| 0.646006793                                                     | 0.979889367                                           | 0.888672748    |                   |
| ENSG00000197283                                                 | 351.1061238                                           | 376.1229401    | 355.7224449       |
| 287.9992416                                                     | 178.0727252                                           | 268.2807431    | 360.9838363       |
| 244.7842366                                                     | 0.558756706                                           | 0.031557888    | 0.156147546       |
| SYNGAP1 6                                                       | 33419661                                              | 33457541       | + 12129           |
| protein_coding                                                  | synaptic Ras GTPase activating protein 1 [Source:HGNC |                |                   |
| Symbol;Acc:HGNC:11497]                                          | -                                                     | 387 425        | 306 278 156       |
| 311                                                             | 1.562480667                                           | 1.660314554    | 1.569651636       |
| 1.273596461                                                     | 0.790582074                                           | 1.192247474    |                   |
| ENSG0000011590                                                  | 2.721752898                                           | 4.424975766    | 0 10.35968495     |
| 22.82983656                                                     | 18.11541995                                           | 2.382242888    | 17.10164715       |
| -2.805909761                                                    | 0.031571976                                           | 0.156173569    | ZBTB32 19         |
| 35704527                                                        | 35717038                                              | + 2770         | protein_coding    |
| zinc finger and BTB domain containing 32 [Source:HGNC           |                                                       |                |                   |
| Symbol;Acc:HGNC:16763]                                          | ZBTB                                                  | 3 5            | 0 10 20           |
| 21                                                              | 0.053035928                                           | 0.085529646    | 0 0.200600622     |
| 0.443810514                                                     | 0.352509271                                           |                |                   |
| ENSG0000043143                                                  | 938.0974988                                           | 784.1057057    | 1093.904643       |
| 735.5376314                                                     | 793.3368206                                           | 551.2263499    | 938.7026157       |
| 693.366934                                                      | 0.437432704                                           | 0.031615532    | 0.1563453 JADE2   |
| 5                                                               | 134524312                                             | 134583230      | + 9877            |
| protein_coding                                                  | jade family PHD finger 2 [Source:HGNC                 |                |                   |
| Symbol;Acc:HGNC:22984]                                          | -                                                     | 1034 886       | 941 710 695       |
| 639                                                             | 5.126537854                                           | 4.25045193     | 5.927498002       |
| 3.994342843                                                     | 4.32520913                                            | 3.008200801    |                   |
| ENSG00000166924                                                 | 0.907250966                                           | 0 0            | 0 37.66923033     |
| 0                                                               | 0.302416989                                           | 12.55641011    | -5.159743843      |
| 0.031638839                                                     | 0.156416831                                           | NYAP1 7        | 100483927         |
| 100494799                                                       | + 3586                                                | protein_coding | neuronal tyrosine |
| phosphorylated phosphoinositide-3-kinase adaptor 1 [Source:HGNC |                                                       |                |                   |
| Symbol;Acc:HGNC:22009]                                          | -                                                     | 1 0            | 0 0 33            |
| 0                                                               | 0.013655839                                           | 0 0            | 0 0.565654198     |
| 0                                                               |                                                       |                |                   |
| ENSG00000165678                                                 | 3312.373277                                           | 3612.550215    | 3787.397795       |
| 3107.905485                                                     | 3007.830967                                           | 2664.692011    | 3570.773762       |
| 2926.809488                                                     | 0.286983824                                           | 0.031701108    | 0.156635785 GHITM |
| 10                                                              | 84139440                                              | 84153245       | + 2128            |
| protein_coding                                                  | growth hormone inducible transmembrane protein        |                |                   |
| [Source:HGNC                                                    | Symbol;Acc:HGNC:17281]                                | -              | 3651 4082 3258    |

|                                      |                                                       |                  |              |                |                |
|--------------------------------------|-------------------------------------------------------|------------------|--------------|----------------|----------------|
| 3000                                 | 2635                                                  | 3089             | 84.01733328  | 90.8924516     |                |
| 95.25467574                          | 78.33605104                                           |                  | 76.11256468  | 67.49588604    |                |
| ENSG00000165487                      | 1223.881553                                           |                  | 1106.243941  | 1196.203908    |                |
| 1073.263361                          | 689.4610642                                           |                  | 899.7325242  | 1175.443134    |                |
| 887.4856497                          | 0.404772791                                           |                  | 0.031720469  | 0.156635785    | MICU2          |
| 13                                   | 21492691                                              |                  | 21604214     | -              | 3645           |
| protein_coding                       | mitochondrial                                         | calcium uptake 2 | [Source:HGNC |                |                |
| Symbol;Acc:HGNC:31830]               | -                                                     | 1349             | 1250         | 1029           | 1036           |
| 1043                                 | 18.12354292                                           |                  | 16.24945955  | 17.56405097    | 604            |
| 15.79335023                          | 10.1856035                                            |                  | 13.3050893   |                |                |
| ENSG00000143882                      | 18.14501932                                           |                  | 12.38993214  | 12.78740815    |                |
| 4.14387398                           | 0                                                     | 0                | 14.44078654  | 1.381291327    |                |
| 3.399946567                          | 0.031720688                                           |                  | 0.156635785  | ATP6V1C2       | 2              |
| 10721100                             | 10785110                                              | +                | 3483         | protein_coding |                |
| ATPase H+ transporting V1 subunit C2 | [Source:HGNC                                          |                  |              |                |                |
| Symbol;Acc:HGNC:18264]               | -                                                     | 20               | 14           | 11             | 4              |
| 0                                    | 0.281193453                                           |                  | 0.190458782  | 0.196492536    | 0              |
| 0.063814381                          | 0                                                     | 0                |              |                |                |
| ENSG00000268089                      | 376.5091509                                           |                  | 266.3835411  | 363.8598864    |                |
| 197.8699825                          | 262.5431205                                           |                  | 219.9729565  | 335.5841928    |                |
| 226.7953532                          | 0.565432379                                           |                  | 0.031724676  | 0.156635785    | GABRQ          |
| X                                    | 152638183                                             |                  | 152657534    | +              | 6172           |
| protein_coding                       | gamma-aminobutyric acid type A receptor theta subunit | [Source:HGNC     |              |                |                |
| Symbol;Acc:HGNC:14454]               | -                                                     |                  | 415          | 301            | 313            |
| 191                                  | 230                                                   | 255              | 3.292690138  | 2.310824796    |                |
| 3.155188183                          | 1.71956855                                            |                  | 2.290600118  | 1.92107925     |                |
| ENSG00000182307                      | 2782.538713                                           |                  | 3480.685937  | 3174.764696    |                |
| 3640.393291                          | 3811.441214                                           |                  | 4141.530056  | 3145.996449    |                |
| 3864.454854                          | -0.296873289                                          |                  | 0.031727402  | 0.156635785    |                |
| C8orf33 8                            | 145052378                                             |                  | 145066685    | +              | 4440           |
| protein_coding                       | chromosome 8 open reading frame 33                    | [Source:HGNC     |              |                |                |
| Symbol;Acc:HGNC:26104]               | -                                                     | 3067             | 3933         | 2731           | 3514           |
| 4801                                 | 33.82668891                                           |                  | 41.97274928  | 38.26886454    | 3339           |
| 43.97752971                          | 46.22541397                                           |                  | 50.2782038   |                |                |
| ENSG00000134440                      | 5979.691117                                           |                  | 5821.498117  | 5922.894956    |                |
| 8018.396151                          | 6937.987332                                           |                  | 6475.831313  | 5908.028063    |                |
| 7144.071598                          | -0.274000838                                          |                  | 0.031737245  | 0.156640661    | NARS           |
| 18                                   | 57600656                                              |                  | 57622213     | -              | 4089           |
| protein_coding                       | asparaginyl-tRNA synthetase                           | [Source:HGNC     |              |                |                |
| Symbol;Acc:HGNC:7643]                | -                                                     | 6591             | 6578         | 5095           | 7740           |
| 7507                                 | 78.93377704                                           |                  | 76.22601209  | 77.52359863    | 6078           |
| 105.1806605                          | 91.36733243                                           |                  | 85.36509411  |                |                |
| ENSG00000182685                      | 40.82629347                                           |                  | 46.90474312  | 32.5497662     |                |
| 3.107905485                          | 7.990442797                                           |                  | 23.29125422  | 40.09360093    |                |
| 11.46320083                          | 1.791131821                                           |                  | 0.031762758  | 0.156722853    | BRICD5         |
| 16                                   | 2209253                                               | 2211950          | -            | 2083           | protein_coding |
| BRICHOS domain containing 5          | [Source:HGNC                                          |                  |              |                |                |
| Symbol;Acc:HGNC:28309]               | -                                                     |                  |              |                |                |
| 45                                   | 53                                                    | 28               | 3            | 7              | 27             |
| 1.205627208                          | 0.836326018                                           |                  | 0.080028381  | 0.206564711    |                |
| 0.602705996                          |                                                       |                  |              |                |                |

|                                                    |                                     |                        |                |        |  |
|----------------------------------------------------|-------------------------------------|------------------------|----------------|--------|--|
| ENSG00000125898                                    | 291.2275601                         | 269.0385265            | 358.0474282    |        |  |
| 161.6110852                                        | 221.4494147                         | 228.599347             | 306.1045049    |        |  |
| 203.8866156                                        | 0.584351599                         | 0.031773976            | 0.156734483    |        |  |
| FAM110A 20                                         | 833715 857463                       | + 2722                 | protein_coding | family |  |
| with sequence similarity 110 member A [Source:HGNC |                                     |                        |                |        |  |
| Symbol;Acc:HGNC:16188]                             | -                                   | 321 304                | 308 156        | 194    |  |
| 265                                                | 5.774914984                         | 5.291903348            | 7.039947854    |        |  |
| 3.184553293                                        | 4.380876086                         | 4.526773566            |                |        |  |
| ENSG00000111775                                    | 363.8076374                         | 837.2054149            | 727.7197728    |        |  |
| 309.75458                                          | 503.3978962                         | 439.9459131            | 642.9109417    |        |  |
| 417.6994631                                        | 0.622050291                         | 0.031812778            | 0.156882139    | COX6A1 |  |
| 12                                                 | 120438090                           | 120440742              | + 1344         |        |  |
| protein_coding                                     | cytochrome c oxidase subunit 6A1    | [Source:HGNC           |                |        |  |
| Symbol;Acc:HGNC:2277]                              | -                                   | 401 946                | 626 299        | 441    |  |
| 510                                                | 14.61079299                         | 33.35172556            | 28.97890099    |        |  |
| 12.36186405                                        | 20.16910751                         | 17.64419811            |                |        |  |
| ENSG00000091844                                    | 468.1414984                         | 528.3421064            | 341.7725451    |        |  |
| 598.7897901                                        | 791.0538369                         | 518.4460662            | 446.0853833    |        |  |
| 636.0965644                                        | -0.509167675                        | 0.031854075            | 0.157042008    | RGS17  |  |
| 6                                                  | 153004459                           | 153131249              | - 7899         |        |  |
| protein_coding                                     | regulator of G protein signaling 17 | [Source:HGNC           |                |        |  |
| Symbol;Acc:HGNC:14088]                             | -                                   | 516 597                | 294 578        | 693    |  |
| 601                                                | 3.198941303                         | 3.581200679            | 2.315698761    |        |  |
| 4.066003688                                        | 5.392727568                         | 3.537800804            |                |        |  |
| ENSG00000108091                                    | 2080.326465                         | 1960.264264            | 1672.825484    |        |  |
| 2294.670216                                        | 2358.322117                         | 2412.80141             | 1904.472071    |        |  |
| 2355.264581                                        | -0.306013271                        | 0.031892543            | 0.157187849    | CCDC6  |  |
| 10                                                 | 59788763                            | 59906656               | - 7345         |        |  |
| protein_coding                                     | coiled-coil domain containing 6     | [Source:HGNC           |                |        |  |
| Symbol;Acc:HGNC:18782]                             | -                                   | 2293 2215              | 1439 2215      | 2066   |  |
| 2797                                               | 15.28765728                         | 14.28921501            | 12.18921789    |        |  |
| 16.75691143                                        | 17.28963708                         | 17.70645762            |                |        |  |
| ENSG00000167323                                    | 830.1346339                         | 787.6456863            | 770.7319639    |        |  |
| 707.566482                                         | 614.1226036                         | 380.423819             | 796.1707613    |        |  |
| 567.3709682                                        | 0.490391741                         | 0.03192314             | 0.157274322    | STIM1  |  |
| 11                                                 | 3854527 4093210                     | + 7130                 | protein_coding |        |  |
| stromal interaction molecule 1                     | [Source:HGNC                        | Symbol;Acc:HGNC:11386] |                |        |  |
| -                                                  | 915 890                             | 663 683                | 538 441        |        |  |
| 6.284348309                                        | 5.914620955                         | 5.785366083            | 5.322837618    |        |  |
| 4.638099978                                        | 2.875941699                         |                        |                |        |  |
| ENSG00000155011                                    | 20.86677222                         | 11.50493699            | 16.2748831     |        |  |
| 5.179842475                                        | 0 0                                 | 16.21553077            | 1.726614158    |        |  |
| 3.242897075                                        | 0.031940912                         | 0.157274322            | DKK2 4         |        |  |
| 106921802                                          | 107283806                           | - 4319                 | protein_coding |        |  |
| dickkopf WNT signaling pathway inhibitor 2         | [Source:HGNC                        |                        |                |        |  |
| Symbol;Acc:HGNC:2892]                              | -                                   | 23 13                  | 14 5           | 0      |  |
| 0                                                  | 0.26077942                          | 0.142622022            | 0.20167482     |        |  |
| 0.064327821                                        | 0 0                                 |                        |                |        |  |
| ENSG00000130513                                    | 238.6070041                         | 161.954113             | 325.497662     |        |  |
| 233.0929114                                        | 74.19696883                         | 61.24737221            | 242.019593     |        |  |

|                        |                                                    |                       |                |        |
|------------------------|----------------------------------------------------|-----------------------|----------------|--------|
| 122.8457508            | 0.97818099                                         | 0.03194948            | 0.157274322    | GDF15  |
| 19                     | 18374731                                           | 18389176              | + 2087         |        |
| protein_coding         | growth differentiation factor 15                   | [Source:HGNC          |                |        |
| Symbol;Acc:HGNC:30142] | -                                                  | 263 183               | 280 225        | 65     |
| 71                     | 6.171091459                                        | 4.154847438           | 8.347230935    |        |
| 5.990624698            | 1.914424607                                        | 1.581855897           |                |        |
| ENSG0000017797         | 1949.682326                                        | 1708.040646           | 2290.10855     |        |
| 1712.455922            | 1502.203246                                        | 1477.700685           | 1982.610507    |        |
| 1564.119951            | 0.341573873                                        | 0.031967806           | 0.157274322    | RALBP1 |
| 18                     | 9475009 9538116                                    | + 8043                | protein_coding | ralA   |
| binding protein 1      | [Source:HGNC                                       | Symbol;Acc:HGNC:9841] | -              | 2149   |
| 1930                   | 1970 1653                                          | 1316 1713             | 13.08419567    |        |
| 11.37013657            | 15.23894859                                        | 11.42001905           | 10.05738744    |        |
| 9.903080569            |                                                    |                       |                |        |
| ENSG00000124120        | 599.6928885                                        | 674.3663067           | 546.3710754    |        |
| 867.1056302            | 723.7058191                                        | 802.2543121           | 606.8100902    |        |
| 797.6885871            | -0.393950661                                       | 0.031968988           | 0.157274322    | TTPAL  |
| 20                     | 44475886                                           | 44494603              | + 7044         |        |
| protein_coding         | alpha tocopherol transfer protein like             | [Source:HGNC          |                |        |
| Symbol;Acc:HGNC:16114] | -                                                  | 661 762               | 470 837        | 634    |
| 930                    | 4.59526748                                         | 5.125804817           | 4.151311832    |        |
| 6.602648145            | 5.53244711                                         | 6.138957396           |                |        |
| ENSG00000279118        | 36.29003864                                        | 49.55972857           | 37.1997328     | 0      |
| 19.40536108            | 11.21430759                                        | 41.0165               | 10.20655622    |        |
| 2.01258467             | 0.031973365                                        | 0.157274322           | AC093535.2     | 5      |
| 126496279              | 126498604                                          | +                     | 2326 TEC       | tec    |
| -                      | 40 56                                              | 32 0                  | 17 13          |        |
| 0.842129662            | 1.14078751                                         | 0.855947474           | 0 0.449248433  |        |
| 0.259875094            |                                                    |                       |                |        |
| ENSG00000169258        | 710.3775064                                        | 889.4201289           | 788.1693386    |        |
| 843.2783549            | 1236.23565                                         | 1097.276866           | 795.9889913    |        |
| 1058.93029             | -0.411477272                                       | 0.031979729           | 0.157274322    | GPRIN1 |
| 5                      | 176595802                                          | 176610133             | - 4211         |        |
| protein_coding         | G protein regulated inducer of neurite outgrowth 1 | [Source:HGNC          |                |        |
| Symbol;Acc:HGNC:24835] | -                                                  | 783 1005              | 678            |        |
| 814                    | 1083 1272                                          | 9.105529468           | 11.30855882    |        |
| 10.01731427            | 10.74116053                                        | 15.80849679           | 14.04536042    |        |
| ENSG00000130175        | 7843.184601                                        | 9252.624326           | 10247.36389    |        |
| 7176.153764            | 7515.582197                                        | 7737.872236           | 9114.39094     |        |
| 7476.536066            | 0.285618775                                        | 0.031981216           | 0.157274322    | PRKCSH |
| 19                     | 11435288                                           | 11450968              | + 5166         |        |
| protein_coding         | protein kinase C substrate 80K-H                   | [Source:HGNC          |                |        |
| Symbol;Acc:HGNC:9411]  | -                                                  | 8645 10455            | 8815 6927      | 6584   |
| 8970                   | 81.9481737                                         | 95.89502487           | 106.163386     |        |
| 74.50798688            | 78.3398581                                         | 80.73634029           |                |        |
| ENSG00000280385        | 329.3321007                                        | 269.9235217           | 172.0487642    |        |
| 477.5814762            | 323.0421874                                        | 380.423819            | 257.1014622    |        |
| 393.6824942            | -0.612297856                                       | 0.032046017           | 0.157508282    |        |
| AP000648.3             | 11 90193614                                        | 90198120              | + 4507         |        |
| TEC                    | novel transcript                                   | -                     | 363 305        | 148    |



|                                     |                                                 |       |             |                  |        |
|-------------------------------------|-------------------------------------------------|-------|-------------|------------------|--------|
| 461                                 | 283                                             | 441   | 3.944098482 | 3.206555211      |        |
| 2.043059449                         | 5.683624936                                     |       | 3.859635014 | 4.549692547      |        |
| ENSG00000033867                     | 1934.259059                                     |       | 1785.920219 | 1705.37525       |        |
| 1726.959481                         | 1357.233784                                     |       | 997.2107363 | 1808.518176      |        |
| 1360.468                            | 0.411461242                                     |       | 0.0320466   | 0.157508282      | SLC4A7 |
| 3                                   | 27372721                                        |       | 27484420    | - 9616           |        |
| protein_coding                      | solute carrier family 4 member 7                |       |             |                  |        |
| Symbol;Acc:HGNC:11033]              | -                                               |       | 2132 2018   | 1467 1667        | 1189   |
| 1156                                | 10.85728978                                     |       | 9.943817569 | 9.491667273      |        |
| 9.632814316                         | 7.600370439                                     |       | 5.589775908 |                  |        |
| ENSG00000229644                     | 140.6238997                                     |       | 173.45905   | 176.6987308      |        |
| 271.4237457                         | 265.967596                                      |       | 210.483927  | 163.5938935      |        |
| 249.2917562                         | -0.607498654                                    |       | 0.032062548 | 0.157542891      |        |
| NAMPTP1 10                          | 36521721                                        |       | 36524234    | - 2514           |        |
| processed_pseudogene                | nicotinamide phosphoribosyltransferase          |       |             |                  |        |
| pseudogene 1 [Source:HGNC           | Symbol;Acc:HGNC:17633]                          |       |             | -                | 155    |
| 196                                 | 152 262                                         |       | 233 244     | 3.019222424      |        |
| 3.694173077                         | 3.761708697                                     |       | 5.790926618 | 5.696892283      |        |
| 4.512898554                         |                                                 |       |             |                  |        |
| ENSG00000251192                     | 76.20908114                                     |       | 71.6846074  | 94.16182364      |        |
| 155.3952742                         | 106.15874                                       |       | 160.4508624 | 80.68517073      |        |
| 140.6682922                         | -0.806197635                                    |       | 0.032118018 | 0.157771626      | ZNF674 |
| X                                   | 46497727                                        |       | 46545457    | - 6203           |        |
| protein_coding                      | zinc finger protein 674                         |       |             |                  |        |
| Symbol;Acc:HGNC:17625]              | zf-C2H2                                         | 84 81 | 81 150      |                  | 93     |
| 186                                 | 0.663141471                                     |       | 0.618742116 | 0.812437731      |        |
| 1.343697538                         | 0.921570422                                     |       | 1.394254906 |                  |        |
| ENSG00000123989                     | 2455.928365                                     |       | 2907.209078 | 3170.114729      |        |
| 2310.209744                         | 2279.559181                                     |       | 2313.597919 | 2844.417391      |        |
| 2301.122281                         | 0.305436257                                     |       | 0.032221957 | 0.158215571      | CHPF   |
| 2                                   | 219538947                                       |       | 219543787   | - 3354           |        |
| protein_coding                      | chondroitin polymerizing factor                 |       |             |                  |        |
| Symbol;Acc:HGNC:24291]              | -                                               |       | 2707 3285   | 2727 2230        | 1997   |
| 2682                                | 39.52336208                                     |       | 46.4086309  | 50.58583537      |        |
| 36.94484496                         | 36.59842253                                     |       | 37.18148519 |                  |        |
| ENSG00000101266                     | 5286.551379                                     |       | 5186.956592 | 5578.797428      |        |
| 6042.804231                         | 6363.816942                                     |       | 6764.815393 | 5350.768466      |        |
| 6390.478855                         | -0.256355778                                    |       | 0.032226282 | 0.158215571      |        |
| CSNK2A1 20                          | 472498 543835                                   |       | - 29523     | protein_coding   | casein |
| kinase 2 alpha 1 [Source:HGNC       | Symbol;Acc:HGNC:2457]                           |       |             | -                | 5827   |
| 5861                                | 4799 5833                                       |       | 5575 7842   | 9.665252742      |        |
| 9.406708275                         | 10.11339826                                     |       | 10.97851333 | 11.60731433      |        |
| 12.35086485                         |                                                 |       |             |                  |        |
| ENSG00000051382                     | 850.0941551                                     |       | 868.1802452 | 749.8071142      |        |
| 1232.802509                         | 1088.983204                                     |       | 900.5951633 | 822.6938382      |        |
| 1074.126959                         | -0.383565668                                    |       | 0.032357176 | 0.158793265      | PIK3CB |
| 3                                   | 138652699                                       |       | 138834938   | - 7850           |        |
| protein_coding                      | "phosphatidylinositol-4,5-bisphosphate 3-kinase |       |             |                  |        |
| catalytic subunit beta [Source:HGNC | Symbol;Acc:HGNC:8976]"                          |       |             | -                |        |
| 937                                 | 981 645                                         |       | 1190 954    | 1044 5.845189799 |        |

|                                                               |                                                  |             |             |                |                |
|---------------------------------------------------------------|--------------------------------------------------|-------------|-------------|----------------|----------------|
|                                                               | 5.921418981                                      | 5.112071324 | 8.423437315 | 7.470094195    |                |
|                                                               | 6.183891486                                      |             |             |                |                |
| ENSG00000271590                                               | 31.75378381                                      | 8.849951531 | 2.3249833   | 0              |                |
|                                                               | 3.424475485                                      | 0           | 14.30957288 | 1.141491828    |                |
| 3.717851                                                      | 0.032361904                                      | 0.158793265 | AC108463.3  | 2              |                |
|                                                               | 111210995                                        | 111212476   | -           | 1482           | lincRNA novel  |
| transcript                                                    | -                                                | 35          | 10          | 2              | 0              |
|                                                               | 1.156507688                                      | 0.319726208 | 0.083963134 | 0              |                |
| 0.124428656                                                   | 0                                                |             |             |                |                |
| ENSG00000149571                                               | 17.23776835                                      | 24.77986429 | 24.41232465 | 0              |                |
|                                                               | 9.131934625                                      | 0           | 22.1433191  | 3.043978208    |                |
| 2.90509707                                                    | 0.032414532                                      | 0.159007392 | KIRREL3     | 11             |                |
| 126423359                                                     | 127003460                                        | -           | 6594        | protein_coding | kirre          |
| like nephrin family adhesion molecule 3 [Source:HGNC          |                                                  |             |             |                |                |
| Symbol;Acc:HGNC:23204]                                        | -                                                | 19          | 28          | 21             | 0              |
|                                                               | 0                                                | 0.141102056 | 0.201203499 | 0.198142299    | 0              |
|                                                               | 0.074574166                                      | 0           |             |                |                |
| ENSG00000122042                                               | 978.0165413                                      | 985.8846006 | 1134.59185  |                |                |
| 1084.659014                                                   | 1533.023525                                      | 1407.826922 | 1032.830997 |                |                |
| 1341.836487                                                   | -0.378039351                                     | 0.03245     | 0.159096728 | UBL3           | 13             |
|                                                               | 29764371                                         | 29850684    | -           | 4384           | protein_coding |
| ubiquitin like 3 [Source:HGNC Symbol;Acc:HGNC:12504]          |                                                  |             |             |                | -              |
|                                                               | 1078                                             | 1114        | 976         | 1047           | 1343           |
|                                                               | 12.04040474                                      | 13.85115913 | 13.2705273  | 1632           | 12.04139766    |
|                                                               | 17.30934472                                      |             |             |                | 18.83010871    |
| ENSG00000089063                                               | 1819.038187                                      | 1780.610248 | 1894.861389 |                |                |
| 2310.209744                                                   | 2140.297178                                      | 2238.548322 | 1831.503275 |                |                |
| 2229.685081                                                   | -0.284088973                                     | 0.032454858 | 0.159096728 |                |                |
| TMEM230                                                       | 20                                               | 5068232     | 5113103     | -              | 3051           |
| transmembrane protein 230 [Source:HGNC Symbol;Acc:HGNC:15876] |                                                  |             |             |                | -              |
|                                                               | 2005                                             | 2012        | 1630        | 2230           | 1875           |
|                                                               | 31.24727932                                      | 33.23932864 | 40.61390036 | 2595           | 32.18109763    |
|                                                               | 39.54815                                         |             |             |                | 37.77516975    |
| ENSG00000172500                                               | 1504.222102                                      | 1773.530287 | 1589.126085 |                |                |
| 2055.361494                                                   | 1988.478765                                      | 1956.465355 | 1622.292825 |                |                |
| 2000.101871                                                   | -0.301835818                                     | 0.032462232 | 0.159096728 |                | FIBP           |
|                                                               | 11                                               | 65883741    | 65888539    | -              | 3353           |
| protein_coding                                                | FGF1 intracellular binding protein [Source:HGNC  |             |             |                |                |
| Symbol;Acc:HGNC:3705]                                         | -                                                | 1658        | 2004        | 1367           | 1984           |
|                                                               | 2268                                             | 24.21473142 | 28.31982756 | 25.3654054     | 1742           |
| 32.87911794                                                   | 31.93463505                                      | 31.45143859 |             |                |                |
| ENSG00000138801                                               | 969.8512826                                      | 962.8747266 | 1105.529559 |                |                |
| 801.8396151                                                   | 865.2508058                                      | 680.6222067 | 1012.751856 |                |                |
| 782.5708758                                                   | 0.3723976                                        | 0.032476245 | 0.159096728 |                | PAPSS1         |
|                                                               | 4                                                | 107590276   | 107720452   | -              | 3478           |
| protein_coding                                                | 3'-phosphoadenosine 5'-phosphosulfate synthase 1 |             |             |                |                |
| [Source:HGNC Symbol;Acc:HGNC:8603]                            |                                                  |             |             |                |                |
|                                                               | 774                                              | 758         | 789         | 15.051397      | 14.82264674    |
| 17.01209448                                                   | 12.36583441                                      | 13.3963655  | 10.54820214 |                |                |
| ENSG00000067704                                               | 4920.929239                                      | 3682.464832 | 4130.332832 |                |                |

|                    |                                                                                                      |                                                                  |             |                     |
|--------------------|------------------------------------------------------------------------------------------------------|------------------------------------------------------------------|-------------|---------------------|
| 4005.054201        | 3179.054741                                                                                          | 2763.032862                                                      | 4244.575635 |                     |
| 3315.713935        | 0.356500629                                                                                          | 0.032480943                                                      | 0.159096728 | IARS2               |
| 1                  | 220094102                                                                                            | 220148041                                                        | + 4165      |                     |
| protein_coding     | "isoleucyl-tRNA synthetase 2, mitochondrial [Source:HGNC Symbol;Acc:HGNC:29685]"                     |                                                                  |             |                     |
| 3866               | 2785                                                                                                 | 3203                                                             | 5424 4161   | 3553                |
| 53.07463893        | 51.57733372                                                                                          | 63.77248769                                                      | 47.33791777 |                     |
| ENSG00000099940    | 1133.156457                                                                                          | 41.10148885                                                      | 35.75797785 |                     |
| 1070.155455        | 945.1552337                                                                                          | 1283.242972                                                      | 1255.490982 |                     |
| 962.1920416        | 0.347432331                                                                                          | 871.2654357                                                      | 1223.96347  |                     |
| 22                 | 20858983                                                                                             | 0.032486708                                                      | 0.159096728 | SNAP29              |
| 22                 | 20858983                                                                                             | 20891218                                                         | + 4953      |                     |
| protein_coding     | synaptosome associated protein 29 [Source:HGNC Symbol;Acc:HGNC:11133]                                |                                                                  |             |                     |
| 1010               | 12.34874419                                                                                          | 1249 1450                                                        | 1080 1033   | 828                 |
| 11.58894861        | 10.27565155                                                                                          | 13.87158588                                                      | 13.56632678 |                     |
| ENSG00000248371    | 6.350756762                                                                                          | 9.481653143                                                      |             |                     |
| 25.89921237        | 10.27342645                                                                                          | 19.46989337                                                      | 8.137441549 |                     |
| 43.11255191        | -1.92899973                                                                                          | 93.16501689                                                      | 11.31936389 |                     |
| LINC02056          | 5                                                                                                    | 0.032498212                                                      | 0.159109017 |                     |
|                    | 72574120                                                                                             | 72660669                                                         | -           | 818                 |
|                    | lincRNA long intergenic non-protein coding RNA 2056 [Source:HGNC Symbol;Acc:HGNC:52898]              |                                                                  |             |                     |
| 25                 | 9                                                                                                    | 108                                                              | 7 22        | 7                   |
| 0.532416594        | 1.698238759                                                                                          | 0.419057309                                                      | 1.274370818 |                     |
| ENSG00000178150    | 16.33051739                                                                                          | 0.676295606                                                      | 6.139054232 | 0                   |
|                    | 3.424475485                                                                                          | 0                                                                | 6.974949899 |                     |
| 3.591036724        | 0.032588325                                                                                          | 13.07846001                                                      | 1.141491828 |                     |
| 48270102           | 48287608                                                                                             | 0.159506057                                                      | ZNF114 19   |                     |
| finger protein 114 | [Source:HGNC Symbol;Acc:HGNC:12894] zf-C2H2                                                          |                                                                  |             | 18                  |
| 18                 | 6                                                                                                    | 0                                                                | 3 0         | 0.29450622          |
| 0.284965464        | 0.124724388                                                                                          | 0                                                                | 0.061611516 | 0                   |
| ENSG00000135744    | 12.70151352                                                                                          | 1.769990306                                                      | 5.812458249 | 0                   |
|                    | 0                                                                                                    | 6.761320693                                                      | 0           | 5.190794711         |
| 0.032648391        | 1                                                                                                    | AGT                                                              | 1           | 230702523 230714297 |
| -                  | 2291                                                                                                 | protein_coding angiotensinogen [Source:HGNC Symbol;Acc:HGNC:333] |             |                     |
| 0                  | 0.299248257                                                                                          | 14                                                               | 2           | 5 0 0               |
| 0                  | 0                                                                                                    | 0.04136484                                                       | 0.135784989 | 0                   |
| ENSG00000166896    | 137.9021468                                                                                          | 85.84452985                                                      | 138.3365063 |                     |
| 91.16522755        | 57.07459141                                                                                          | 25.01653231                                                      | 120.6943943 |                     |
| 57.75211709        | 1.066870617                                                                                          | 0.03268882                                                       | 0.159953674 | ATP23               |
| 12                 | 57906039                                                                                             | 57959148                                                         | + 3327      |                     |
| protein_coding     | ATP23 metalloproteinase and ATP synthase assembly factor homolog [Source:HGNC Symbol;Acc:HGNC:29452] |                                                                  |             |                     |
| 97                 | 119                                                                                                  | 88                                                               | 50 29       | 2.23727552          |
| 1.381482457        | 2.225363739                                                                                          | 1.469744741                                                      | 0.923771509 |                     |
| 0.405299637        |                                                                                                      |                                                                  |             |                     |
| ENSG00000161714    | 899.9929583                                                                                          | 850.4803421                                                      | 1025.317635 |                     |
| 854.6740083        | 638.0939319                                                                                          | 578.8307994                                                      | 925.2636452 |                     |
| 690.5329132        | 0.422107009                                                                                          | 0.032707478                                                      | 0.159988994 | PLCD3               |
| 17                 | 45108967                                                                                             | 45133354                                                         | - 6740      |                     |

|                                          |                                            |                                   |             |             |                |        |
|------------------------------------------|--------------------------------------------|-----------------------------------|-------------|-------------|----------------|--------|
| protein_coding                           | phospholipase C delta 3                    | [Source:HGNC                      |             |             |                |        |
| Symbol;Acc:HGNC:9061]                    | -                                          | 992                               | 961         | 882         | 825            | 559    |
| 671                                      | 7.207430432                                | 6.756004528                       |             | 8.141708239 |                |        |
| 6.80152182                               | 5.097993431                                | 4.629068866                       |             |             |                |        |
| ENSG00000101856                          | 4020.936281                                | 4434.710712                       |             | 4048.958417 |                |        |
| 5539.323542                              | 4972.338404                                | 4635.822229                       |             | 4168.201803 |                |        |
| 5049.161392                              | -0.276435945                               | 0.032714127                       |             | 0.159988994 |                | PGRMC1 |
| X                                        | 119236245                                  | 119244466                         |             | + 1919      |                |        |
| protein_coding                           | progesterone receptor membrane component 1 |                                   |             |             |                |        |
| [Source:HGNC Symbol;Acc:HGNC:16090]      | -                                          | 4432                              | 5011        |             |                | 3483   |
| 5347                                     | 4356                                       | 5374                              | 113.0976186 | 123.7302438 |                |        |
| 112.9237642                              | 154.8271976                                | 139.5276426                       |             | 130.2128083 |                |        |
| ENSG00000284906                          | 47.17705023                                | 30.08983521                       |             | 23.249833   |                |        |
| 5.179842475                              | 12.55641011                                | 12.07694663                       |             | 33.50557281 |                |        |
| 9.937733073                              | 1.754764845                                | 0.032743675                       |             | 0.16008924  |                |        |
| AC091057.6                               | 15                                         | 30624548                          | 30685606    | +           |                | 2297   |
| protein_coding                           | Rho GTPase-activating protein 11B          |                                   |             |             |                |        |
| [Source:UniProtKB/Swiss-Prot;Acc:Q3KRB8] | -                                          |                                   |             | 52          |                | 34     |
| 20                                       | 5                                          | 11                                | 14          | 1.108590192 | 0.701365441    |        |
| 0.541721219                              | 0.120954228                                | 0.294360173                       |             | 0.283398834 |                |        |
| ENSG00000269693                          | 13.60876449                                | 8.849951531                       |             | 27.8997996  |                | 0      |
| 0                                        | 5.175834272                                | 16.78617187                       |             | 1.725278091 |                |        |
| 3.214922008                              | 0.032770209                                | 0.160174698                       |             | AC010422.6  |                | 19     |
| 12525720                                 | 12580975                                   | -                                 |             | 5857        | protein_coding |        |
| novel transcript                         | zf-C2H2                                    | 15                                |             | 10          | 24             | 0      |
| 0                                        | 6                                          | 0.125413624                       | 0.080900502 | 0.254942866 |                |        |
| 0                                        | 0                                          | 0.047632902                       |             |             |                |        |
| ENSG00000071537                          | 1837.183206                                | 1269.08305                        |             | 1699.562792 |                |        |
| 1571.564207                              | 926.8913645                                | 998.9360144                       |             | 1601.943016 |                |        |
| 1165.797195                              | 0.458364298                                | 0.032822257                       |             | 0.160384782 |                | SEL1L  |
| 14                                       | 81471549                                   | 81533861                          |             | - 9559      |                |        |
| protein_coding                           | "SEL1L, ERAD E3 ligase adaptor subunit     | [Source:HGNC                      |             |             |                |        |
| Symbol;Acc:HGNC:10717]"                  | -                                          | 2025                              | 1434        | 1462        | 1517           | 812    |
| 1158                                     | 10.37388071                                | 7.10825715                        |             | 9.515722261 |                |        |
| 8.818305956                              | 5.221447646                                | 5.632836116                       |             |             |                |        |
| ENSG00000142208                          | 2761.67194                                 | 2415.151773                       |             | 2857.404475 |                |        |
| 2371.331885                              | 2128.88226                                 | 2013.399532                       |             | 2678.076063 |                |        |
| 2171.204559                              | 0.302623411                                | 0.032886834                       |             | 0.160655951 |                | AKT1   |
| 14                                       | 104769349                                  | 104795751                         |             | - 11162     |                |        |
| protein_coding                           | AKT serine/threonine kinase 1              | [Source:HGNC                      |             |             |                |        |
| Symbol;Acc:HGNC:391]                     | -                                          | 3044                              | 2729        | 2458        | 2289           | 1865   |
| 2334                                     | 13.35461319                                | 11.58478447                       |             | 13.70082462 |                |        |
| 11.39503906                              | 10.27032479                                | 9.722766404                       |             |             |                |        |
| ENSG00000100299                          | 79.83808501                                | 97.34946684                       |             | 103.4617568 |                |        |
| 54.90633023                              | 54.79160775                                | 12.07694663                       |             | 93.54976956 |                |        |
| 40.59162821                              | 1.211910532                                | 0.032898116                       |             | 0.160666696 |                | ARSA   |
| 22                                       | 50622754                                   | 50628173                          |             | - 2932      |                |        |
| protein_coding                           | arylsulfatase A                            | [Source:HGNC Symbol;Acc:HGNC:713] |             |             |                |        |
| -                                        | 88                                         | 110                               | 89          | 53          | 48             | 14     |
| 1.469763269                              | 1.777686441                                | 1.888569133                       |             | 1.00443988  |                |        |

|                        |                                                |                                 |             |  |  |                 |   |
|------------------------|------------------------------------------------|---------------------------------|-------------|--|--|-----------------|---|
| 1.006293417            | 0.222021528                                    |                                 |             |  |  |                 |   |
| ENSG00000160888        | 766.6270663                                    | 1101.818966                     | 1036.942552 |  |  |                 |   |
| 976.9182907            | 1276.187864                                    | 1776.173794                     | 968.4628612 |  |  |                 |   |
| 1343.093316            | -0.472621626                                   | 0.032939432                     | 0.160824073 |  |  | IER2            |   |
| 19                     | 13150415                                       | 13154908                        | + 3072      |  |  |                 |   |
| protein_coding         | immediate early response 2 [Source:HGNC        |                                 |             |  |  |                 |   |
| Symbol;Acc:HGNC:28871] | -                                              | 845 1245                        | 892 943     |  |  | 1118            |   |
| 2059                   | 13.46989409                                    | 19.20324315                     | 18.06552095 |  |  |                 |   |
| 17.05699511            | 22.37010138                                    | 31.16492983                     |             |  |  |                 |   |
| ENSG00000137776        | 1703.817314                                    | 1483.251877                     | 1471.714429 |  |  |                 |   |
| 1214.155076            | 1344.677374                                    | 1161.112155                     | 1552.927873 |  |  |                 |   |
| 1239.981535            | 0.325358689                                    | 0.032975126                     | 0.16095392  |  |  | SLTM            |   |
| 15                     | 58879045                                       | 58933653                        | - 8157      |  |  |                 |   |
| protein_coding         | SAFB like transcription modulator [Source:HGNC |                                 |             |  |  |                 |   |
| Symbol;Acc:HGNC:20709] | -                                              | 1878 1676                       | 1266 1172   |  |  | 1178            |   |
| 1346                   | 11.27440961                                    | 9.735762991                     | 9.656285328 |  |  |                 |   |
| 7.983791617            | 8.876917596                                    | 7.67265403                      |             |  |  |                 |   |
| ENSG00000272173        | 8.165258694                                    | 7.964956378                     | 3.48747495  |  |  | 0               |   |
| 0                      | 0                                              | 6.539230007                     | 0           |  |  | 5.14496974      |   |
| 0.033008555            | 1                                              | U47924.2                        | 12          |  |  | 6943508 6944604 | - |
| 1097                   | antisense                                      | "novel transcript, antisense to |             |  |  |                 |   |
| C12orf57"              | -                                              | 9                               | 9           |  |  | 3 0 0           | 0 |
| 0.40175803             | 0.388742768                                    | 0.170145894                     | 0           |  |  | 0               | 0 |
| 0                      |                                                |                                 |             |  |  |                 |   |
| ENSG00000213023        | 0                                              | 1.769990306                     | 0           |  |  | 3.107905485     |   |
| 19.40536108            | 9.489029498                                    | 0.589996769                     |             |  |  |                 |   |
| 10.66743202            | -4.10911639                                    | 0.033042724                     | 0.161239378 |  |  | SYT3            |   |
| 19                     | 50621307                                       | 50639827                        | - 3790      |  |  |                 |   |
| protein_coding         | synaptotagmin 3 [Source:HGNC                   |                                 |             |  |  |                 |   |
| Symbol;Acc:HGNC:11511] | -                                              | 0 2                             | 0 3         |  |  | 17 11           | 0 |
| 0.025004445            | 0                                              | 0.043983936                     | 0.275712891 |  |  |                 |   |
| 0.134953606            |                                                |                                 |             |  |  |                 |   |
| ENSG00000205097        | 694.046989                                     | 588.5217768                     | 368.509853  |  |  |                 |   |
| 511.7684365            | 323.0421874                                    | 189.78059                       | 550.3595396 |  |  |                 |   |
| 341.5304046            | 0.690680502                                    | 0.033101452                     | 0.161481409 |  |  | FRG2            |   |
| 4                      | 190024351                                      | 190027257                       | - 2103      |  |  |                 |   |
| protein_coding         | FSHD region gene 2 [Source:HGNC                |                                 |             |  |  |                 |   |
| Symbol;Acc:HGNC:19136] | -                                              | 765 665                         | 317 494     |  |  | 283 220         |   |
| 17.81356513            | 14.98334617                                    | 9.378358628                     | 13.05268087 |  |  |                 |   |
| 8.271695202            | 4.864233633                                    |                                 |             |  |  |                 |   |
| ENSG00000104979        | 1507.851105                                    | 1893.004633                     | 2026.222946 |  |  |                 |   |
| 1977.663857            | 2343.482723                                    | 2614.658946                     | 1809.026228 |  |  |                 |   |
| 2311.935175            | -0.354503079                                   | 0.033119478                     | 0.1615248   |  |  |                 |   |
| C19orf53               | 19                                             | 13774168                        | 13778462    |  |  | + 1174          |   |
| protein_coding         | chromosome 19 open reading frame 53            |                                 |             |  |  |                 |   |
| [Source:HGNC           | Symbol;Acc:HGNC:24991]                         | -                               | 1662 2139   |  |  | 1743            |   |
| 1909                   | 2053 3031                                      | 69.32527581                     | 86.33146853 |  |  |                 |   |
| 92.37110454            | 90.35451834                                    | 107.4900371                     | 120.0463217 |  |  |                 |   |
| ENSG00000166454        | 1864.400735                                    | 1538.121576                     | 1586.801102 |  |  |                 |   |
| 1896.858314            | 2039.845897                                    | 2309.284724                     | 1663.107804 |  |  |                 |   |

|                                            |                                                    |                                       |                     |             |
|--------------------------------------------|----------------------------------------------------|---------------------------------------|---------------------|-------------|
| 2081.996312                                | -0.324206515                                       | 0.033214684                           | 0.161911021         | ATMIN       |
| 16                                         | 81035847                                           | 81047358                              | +                   | 6262        |
| protein_coding                             | ATM interactor [Source:HGNC Symbol;Acc:HGNC:29034] |                                       |                     |             |
| -                                          | 2055                                               | 1738                                  | 1365                | 1831        |
| 16.07042811                                | 13.15113239                                        | 13.56208415                           | 16.24752914         |             |
| 17.54118179                                | 19.87770889                                        |                                       |                     |             |
| ENSG00000185909                            | 146.9746565                                        | 171.6890597                           | 138.3365063         |             |
| 168.8628647                                | 208.8930046                                        | 382.1490971                           | 152.3334075         |             |
| 253.3016554                                | -0.735073426                                       | 0.033216976                           | 0.161911021         |             |
| KLHDC8B 3                                  | 49171611                                           | 49176486                              | +                   | 2158        |
| protein_coding                             | kelch domain containing 8B [Source:HGNC            |                                       |                     |             |
| Symbol;Acc:HGNC:28557]                     | -                                                  | 162                                   | 194                 | 119         |
| 443                                        | 3.676141822                                        | 4.259677603                           | 3.430855032         | 183         |
| 4.197089281                                | 5.212511301                                        | 9.545162009                           |                     |             |
| ENSG00000105248                            | 589.7131279                                        | 980.5746297                           | 790.4943219         |             |
| 824.6309219                                | 1015.927727                                        | 1532.909583                           | 786.9273598         |             |
| 1124.489411                                | -0.51564919                                        | 0.033241613                           | 0.161934565         | YJU2        |
| 19                                         | 4247079                                            | 4269090                               | +                   | 1671        |
| splicing factor                            | homolog [Source:HGNC Symbol;Acc:HGNC:25518]        |                                       |                     |             |
| 650                                        | 1108                                               | 680                                   | 796                 | 890         |
| 31.4188114                                 | 25.31857796                                        | 26.4696782                            | 32.7386613          |             |
| 49.44723322                                |                                                    |                                       |                     |             |
| ENSG00000109079                            | 1312.792148                                        | 1557.591469                           | 1727.462592         |             |
| 1743.534977                                | 2078.656619                                        | 1987.52036                            | 1532.615403         |             |
| 1936.570652                                | -0.33801632                                        | 0.033244221                           | 0.161934565         |             |
| TNFAIP1 17                                 | 28335602                                           | 28347009                              | +                   | 3889        |
| protein_coding                             | TNF alpha induced protein 1 [Source:HGNC           |                                       |                     |             |
| Symbol;Acc:HGNC:11894]                     | -                                                  | 1447                                  | 1760                | 1486        |
| 2304                                       | 18.22045725                                        | 21.44377124                           | 23.77320377         | 1821        |
| 24.04685123                                | 28.78189357                                        | 27.5470787                            |                     |             |
| ENSG00000103160                            | 1222.974302                                        | 1163.768626                           | 1109.017034         |             |
| 1395.449563                                | 1465.675507                                        | 1475.112767                           | 1165.253321         |             |
| 1445.412612                                | -0.310556659                                       | 0.03324927                            | 0.161934565         | HSDL1       |
| 16                                         | 84122146                                           | 84145192                              | -                   | 4507        |
| protein_coding                             | hydroxysteroid dehydrogenase like 1 [Source:HGNC   |                                       |                     |             |
| Symbol;Acc:HGNC:16475]                     | -                                                  | 1348                                  | 1315                | 954         |
| 1710                                       | 14.64640428                                        | 13.82498394                           | 13.16945077         | 1284        |
| 16.60703425                                | 17.51155957                                        | 17.64166498                           |                     |             |
| ENSG00000232916                            | 0                                                  | 0                                     | 0                   | 10.27342645 |
| 12.93958568                                | 0                                                  | 7.737670711                           | -5.429071315        | 0.033250433 |
| 1                                          | HMG2P27                                            | 5                                     | 116218026           | 116218295   |
| -                                          | 270                                                | processed_pseudogene                  | high mobility group |             |
| nucleosomal binding domain 2 pseudogene 27 | [Source:HGNC                                       |                                       |                     |             |
| Symbol;Acc:HGNC:39394]                     | -                                                  | 0                                     | 0                   | 0           |
| 15                                         | 0                                                  | 0                                     | 0                   | 0           |
| 2.583202861                                |                                                    |                                       |                     |             |
| ENSG00000134551                            | 0                                                  | 0                                     | 9.323716454         | 0           |
| 13.80222472                                | 0                                                  | 7.70864706                            | -5.426303558        | 0.033271935 |
| 1                                          | PRH2                                               | 12                                    | 10929236            | 10932341    |
| 757                                        | protein_coding                                     | proline rich protein HaeIII subfamily |                     |             |

|                                     |                                               |                                        |             |             |     |             |
|-------------------------------------|-----------------------------------------------|----------------------------------------|-------------|-------------|-----|-------------|
| 2                                   | [Source:HGNC Symbol;Acc:HGNC:9367]            | -                                      | 0           | 0           | 0   |             |
| 9                                   | 0                                             | 16                                     | 0           | 0           | 0   | 0.660630581 |
| 0                                   | 0.98277731                                    |                                        |             |             |     |             |
| ENSG00000203930                     | 80.74533597                                   | 33.62981582                            | 72.07448229 |             |     |             |
| 68.37392066                         | 140.4034949                                   | 171.66517                              | 62.14987803 |             |     |             |
| 126.8141952                         | -1.032316953                                  | 0.033293486                            | 0.162075445 |             |     |             |
| LINC00632                           | X                                             | 140709562                              | 140793215   | +           |     | 28876       |
|                                     | antisense                                     | long intergenic non-protein coding RNA | 632         |             |     |             |
| [Source:HGNC Symbol;Acc:HGNC:27865] |                                               | -                                      | 89          | 38          |     | 62          |
| 66                                  | 123                                           | 199                                    | 0.150932115 | 0.062355247 |     |             |
| 0.133586171                         | 0.127004452                                   | 0.261827608                            | 0.32044025  |             |     |             |
| ENSG00000135083                     | 321.166842                                    | 224.7887689                            | 312.7102538 |             |     |             |
| 207.193699                          | 191.7706271                                   | 174.2530871                            | 286.2219549 |             |     |             |
| 191.0724711                         | 0.582843084                                   | 0.033302861                            | 0.162075445 |             |     | CCNJL       |
| 5                                   | 160249106                                     | 160345396                              | -           | 9209        |     |             |
| protein_coding                      | cyclin J like                                 | [Source:HGNC Symbol;Acc:HGNC:25876]    |             |             |     |             |
| -                                   | 354                                           | 254                                    | 269         | 200         | 168 | 202         |
| 1.882432761                         | 1.306916029                                   | 1.817383805                            | 1.206784063 |             |     |             |
| 1.121357698                         | 1.019928939                                   |                                        |             |             |     |             |
| ENSG00000181827                     | 865.5174215                                   | 556.6619513                            | 753.2945891 |             |     |             |
| 546.9913653                         | 616.4055872                                   | 349.3688133                            | 725.1579873 |             |     |             |
| 504.2552553                         | 0.525569941                                   | 0.033312552                            | 0.162075445 |             |     | RFX7        |
| 15                                  | 56087280                                      | 56243266                               | -           | 10588       |     |             |
| protein_coding                      | regulatory factor X7                          | [Source:HGNC                           |             |             |     |             |
| Symbol;Acc:HGNC:25777]              | RFX                                           | 954                                    | 629         | 648         | 528 | 540         |
| 405                                 | 4.41228062                                    | 2.814901184                            | 3.807745555 |             |     |             |
| 2.770971338                         | 3.134925232                                   | 1.778574694                            |             |             |     |             |
| ENSG00000197119                     | 511.6895448                                   | 528.3421064                            | 418.496994  |             |     |             |
| 311.826517                          | 399.5221399                                   | 343.33034                              | 486.1762151 |             |     |             |
| 351.5596656                         | 0.469479057                                   | 0.033315472                            | 0.162075445 |             |     |             |
| SLC25A29                            | 14                                            | 100291111                              | 100306547   | -           |     | 7451        |
|                                     | protein_coding                                | solute carrier family 25 member 29     |             |             |     |             |
| [Source:HGNC Symbol;Acc:HGNC:20116] |                                               | -                                      | 564         | 597         |     | 360         |
| 301                                 | 350                                           | 398                                    | 3.706749385 | 3.796524515 |     |             |
| 3.006040199                         | 2.244729302                                   | 2.887359371                            | 2.483702227 |             |     |             |
| ENSG00000060339                     | 2140.205029                                   | 1577.061363                            | 1753.037408 |             |     |             |
| 1723.851576                         | 1312.715602                                   | 1085.199919                            | 1823.4346   |             |     |             |
| 1373.922366                         | 0.408843604                                   | 0.033324009                            | 0.162075445 |             |     | CCAR1       |
| 10                                  | 68721012                                      | 68792377                               | +           | 6059        |     |             |
| protein_coding                      | cell division cycle and apoptosis regulator 1 |                                        |             |             |     |             |
| [Source:HGNC Symbol;Acc:HGNC:24236] |                                               | -                                      | 2359        | 1782        |     | 1508        |
| 1664                                | 1150                                          | 1258                                   | 19.06582805 | 13.93584117 |     |             |
| 15.4848583                          | 15.26034714                                   | 11.66659839                            | 9.654075852 |             |     |             |
| ENSG00000121964                     | 421.8716992                                   | 340.723134                             | 360.3724115 |             |     |             |
| 516.948279                          | 537.6426511                                   | 473.5888359                            | 374.3224149 |             |     |             |
| 509.3932553                         | -0.443647401                                  | 0.033345416                            | 0.162134984 |             |     | GTDC1       |
| 2                                   | 143938068                                     | 144332568                              | -           | 14162       |     |             |
| protein_coding                      | glycosyltransferase like domain containing 1  |                                        |             |             |     |             |
| [Source:HGNC Symbol;Acc:HGNC:20887] |                                               | -                                      | 465         | 385         |     | 310         |
| 499                                 | 471                                           | 549                                    | 1.607892637 | 1.288138558 |     |             |

|                          |                                          |                        |                                       |                        |             |
|--------------------------|------------------------------------------|------------------------|---------------------------------------|------------------------|-------------|
| 1.361896019              | 1.957888697                              | 2.044295522            | 1.802514523                           |                        |             |
| ENSG00000213214          | 0                                        | 16.81490791            | 6.974949899                           | 0                      | 0           |
| 0                        | 7.929952603                              | 0                      | 5.421290098                           | 0.033373045            |             |
| 0.16222473               | ARHGEF35                                 | 7                      | 144186083                             |                        |             |
| 144195655                | -                                        | 2431                   | protein_coding                        | Rho guanine nucleotide |             |
| exchange factor          | 35 [Source:HGNC                          | Symbol;Acc:HGNC:33846] | -                                     | 0                      |             |
| 19                       | 6                                        | 0                      | 0                                     | 0                      | 0.370335276 |
| 0.153558244              | 0                                        | 0                      | 0                                     |                        |             |
| ENSG00000280062          | 0                                        | 0                      | 1.16249165                            | 0                      | 0           |
| 36.2308399               | 0.387497217                              |                        | 12.07694663                           | -5.113793669           |             |
| 0.033401396              | 0.162317227                              |                        | AL031719.1                            | 16                     | 1530715     |
| 1533301 +                | 2587                                     | TEC                    | TEC                                   | -                      | 0           |
| 0                        | 0                                        | 42                     | 0                                     | 0                      | 0           |
| 0                        | 0.754890361                              |                        |                                       |                        |             |
| ENSG00000144355          | 192.3372048                              |                        | 191.1589531                           | 211.5734803            |             |
| 152.2873688              | 123.2811174                              |                        | 96.61557307                           | 198.356546             |             |
| 124.0613531              | 0.678424318                              |                        | 0.033410426                           | 0.162317227            | DLX1        |
| 2                        | 172084740                                |                        | 172089677                             | +                      | 3656        |
| protein_coding           | distal-less homeobox 1 [Source:HGNC      |                        |                                       |                        |             |
| Symbol;Acc:HGNC:2914]    | Homeobox                                 | 212                    | 216                                   | 182                    | 147         |
| 108                      | 112                                      | 2.83960778             | 2.799458314                           | 3.097219947            |             |
| 2.234205885              | 1.815787109                              |                        | 1.424435713                           |                        |             |
| ENSG00000102996          | 82.5598379                               |                        | 58.40968011                           | 136.011523             |             |
| 27.97114936              | 38.81072216                              |                        | 60.38473317                           | 92.32701368            |             |
| 42.38886823              | 1.11496398                               |                        | 0.033477323                           | 0.162596953            | MMP15       |
| 16                       | 58025566                                 |                        | 58046901                              | +                      | 4419        |
| protein_coding           | matrix metalloproteinase 15 [Source:HGNC |                        |                                       |                        |             |
| Symbol;Acc:HGNC:7161]    | -                                        | 91                     | 66                                    | 117                    | 27          |
| 70                       | 1.008430737                              |                        | 0.707695403                           | 1.64728486             | 34          |
| 0.339509402              | 0.472935893                              |                        | 0.736554787                           |                        |             |
| ENSG00000182854          | 0                                        | 0                      | 0                                     | 29.00711786            | 0           |
| 0                        | 9.669039286                              |                        | -5.748377996                          | 0.033486387            |             |
| 0.162596953              | OR4F15                                   | 15                     | 101812202                             | 101820197              | +           |
| 2119                     | protein_coding                           |                        | olfactory receptor family 4 subfamily |                        |             |
| F member 15 [Source:HGNC | Symbol;Acc:HGNC:15078]                   | -                      | 0                                     | 0                      |             |
| 0                        | 28                                       | 0                      | 0                                     | 0                      | 0           |
| 0.734241822              | 0                                        | 0                      |                                       |                        |             |
| ENSG00000224549          | 14.51601546                              |                        | 8.849951531                           | 0                      | 0           |
| 0                        | 7.788655662                              |                        | 0                                     | 5.398712189            | 0.033551091 |
| 0.162866422              | AC017067.1                               |                        | 9                                     | 22767175               |             |
| 22768316                 | +                                        | 447                    | lincRNA novel transcript              |                        | -           |
| 16                       | 10                                       | 0                      | 0                                     | 0                      | 1.75283543  |
| 1.060031858              | 0                                        | 0                      | 0                                     | 0                      |             |
| ENSG00000172432          | 1288.296372                              |                        | 1328.377725                           | 1336.865397            |             |
| 1003.853472              | 1227.103715                              |                        | 788.4520874                           | 1317.846498            |             |
| 1006.469758              | 0.390016112                              |                        | 0.033572994                           | 0.162928035            | GTPBP2      |
| 6                        | 43605316                                 |                        | 43629162                              | -                      | 4624        |
| protein_coding           | GTP binding protein 2 [Source:HGNC       |                        |                                       |                        |             |
| Symbol;Acc:HGNC:4670]    | -                                        | 1420                   | 1501                                  | 1150                   | 969         |
| 914                      | 15.03831587                              |                        | 15.38116771                           | 15.47343951            | 1075        |



|                                         |                                                       |             |             |                |                |             |  |
|-----------------------------------------|-------------------------------------------------------|-------------|-------------|----------------|----------------|-------------|--|
| 11.64442359                             | 14.29018987                                           | 9.190928519 |             |                |                |             |  |
| ENSG00000126814                         | 684.9744793                                           | 676.136297  | 640.5328991 |                |                |             |  |
| 886.7890316                             | 959.9946275                                           | 754.8091646 | 667.2145585 |                |                |             |  |
| 867.1976079                             | -0.377048155                                          | 0.033596739 | 0.162998553 | TRMT5          |                |             |  |
| 14                                      | 60971451                                              | 60981358    | -           | 5692           |                |             |  |
| protein_coding                          | tRNA methyltransferase 5 [Source:HGNC                 |             |             |                |                |             |  |
| Symbol;Acc:HGNC:23141]                  | -                                                     | 755         | 764         | 551            | 856            | 841         |  |
| 875                                     | 6.49547243                                            | 6.35996767  | 6.022732218 |                |                |             |  |
| 8.356432643                             | 9.081936574                                           | 7.147829421 |             |                |                |             |  |
| ENSG00000139410                         | 50.80605409                                           | 45.13475281 | 60.44956579 |                |                |             |  |
| 23.82727538                             | 18.26386925                                           | 0           | 52.13012423 | 14.03038154    |                |             |  |
| 1.90468996                              | 0.033650622                                           | 0.163215203 | SDSL        | 12             |                |             |  |
| 113422237                               | 113438276                                             | +           | 2216        | protein_coding |                |             |  |
| serine dehydratase like [Source:HGNC    |                                                       |             |             |                |                |             |  |
| Symbol;Acc:HGNC:30404]                  |                                                       |             |             |                |                |             |  |
| -                                       | 56                                                    | 51          | 52          | 23             | 16             | 0           |  |
| 1.237504978                             | 1.09050299                                            | 1.459958242 | 0.576726787 |                |                |             |  |
| 0.443810514                             | 0                                                     |             |             |                |                |             |  |
| ENSG00000105270                         | 301.2073207                                           | 231.8687301 | 408.0345691 |                |                |             |  |
| 430.9628939                             | 448.6062885                                           | 479.6273092 | 313.70354   |                |                |             |  |
| 453.0654972                             | -0.53333235                                           | 0.033706474 | 0.163441288 | CLIP3          |                |             |  |
| 19                                      | 36014660                                              | 36033343    | -           | 3772           |                |             |  |
| protein_coding                          | CAP-Gly domain containing linker protein 3            |             |             |                |                |             |  |
| [Source:HGNC                            |                                                       |             |             |                |                |             |  |
| Symbol;Acc:HGNC:24314]                  |                                                       |             |             |                |                |             |  |
| 416                                     | 393                                                   | 556         | 4.310176783 | 3.291213442    |                | 351         |  |
| 5.789516274                             | 6.12821072                                            | 6.404249256 | 6.853842586 |                |                |             |  |
| ENSG00000226851                         | 7.258007728                                           | 19.46989337 | 5.812458249 |                |                |             |  |
| 2.07193699                              | 0                                                     | 0           | 10.84678645 | 0.690645663    |                |             |  |
| 3.994958043                             | 0.033718398                                           | 0.1634543   | AC004112.1  | 7              |                |             |  |
| 112328189                               | 112409623                                             | -           | 707         | antisense      |                |             |  |
| "novel transcript, antisense to ZNF277" |                                                       |             |             |                |                |             |  |
| -                                       |                                                       |             |             |                |                |             |  |
| 5                                       | 2                                                     | 0           | 0           | 0.554114171    | 1.474448839    |             |  |
| 0.440004823                             | 0.157189172                                           | 0           | 0           |                |                |             |  |
| ENSG00000070047                         | 1821.75994                                            | 1859.374817 | 1718.162659 |                |                |             |  |
| 1985.951605                             | 2118.608833                                           | 2687.983265 | 1799.765805 |                |                |             |  |
| 2264.181234                             | -0.331470585                                          | 0.033729966 | 0.16346558  | PHRF1          |                |             |  |
| 11                                      | 576486                                                | 612222      | +           | 5769           | protein_coding | PHD         |  |
| and ring finger domains 1 [Source:HGNC  |                                                       |             |             |                |                |             |  |
| Symbol;Acc:HGNC:24351]                  |                                                       |             |             |                |                |             |  |
| 2008                                    | 2101                                                  | 1478        | 1917        | 1856           | 3116           | 17.04479778 |  |
| 17.25646974                             | 15.93972196                                           | 18.46433273 | 19.77537798 |                |                |             |  |
| 25.11469615                             |                                                       |             |             |                |                |             |  |
| ENSG00000198315                         | 794.7518462                                           | 753.1308753 | 754.4570808 |                |                |             |  |
| 996.6016921                             | 1162.038681                                           | 841.0730691 | 767.4466008 |                |                |             |  |
| 999.9044808                             | -0.380685995                                          | 0.033740973 | 0.163474135 |                |                |             |  |
| ZKSCAN8                                 | 28141910                                              | 28159472    | +           | 7565           |                |             |  |
| protein_coding                          | zinc finger with KRAB and SCAN domains 8 [Source:HGNC |             |             |                |                |             |  |
| Symbol;Acc:HGNC:12983]                  | zf-C2H2                                               | 876         | 851         | 649            | 962            | 1018        |  |
| 975                                     | 5.670532676                                           | 5.330243737 | 5.337558046 |                |                |             |  |
| 7.066074033                             | 8.271536792                                           | 5.992757464 |             |                |                |             |  |
| ENSG00000112972                         | 1671.156279                                           | 985.8846006 | 1222.941216 |                |                |             |  |
| 1165.464557                             | 945.1552337                                           | 618.5121955 | 1293.327365 |                |                |             |  |

|                                     |                                                        |             |                |        |
|-------------------------------------|--------------------------------------------------------|-------------|----------------|--------|
| 909.710662                          | 0.508446473                                            | 0.033752506 | 0.163485237    | HMGCS1 |
| 5                                   | 43289395                                               | 43313512    | - 4702         |        |
| protein_coding                      | 3-hydroxy-3-methylglutaryl-CoA synthase 1 [Source:HGNC |             |                |        |
| Symbol;Acc:HGNC:5007]               | -                                                      | 1842 1114   | 1052 1125      | 828    |
| 717                                 | 19.18384623                                            | 11.22610259 | 13.92002328    |        |
| 13.29480407                         | 10.82418166                                            | 7.090347964 |                |        |
| ENSG00000143353                     | 435.4804637                                            | 395.5928334 | 464.99666      |        |
| 571.8546092                         | 601.5661934                                            | 551.2263499 | 432.023319     |        |
| 574.8823842                         | -0.412643728                                           | 0.033868734 | 0.164003294    |        |
| LYPLAL1 1                           | 219173844                                              | 219212865   | + 2966         |        |
| protein_coding                      | lysophospholipase like 1 [Source:HGNC                  |             |                |        |
| Symbol;Acc:HGNC:20440]              | -                                                      | 480 447     | 400 552        | 527    |
| 639                                 | 7.924990937                                            | 7.141062223 | 8.390651653    |        |
| 10.34141519                         | 10.92161414                                            | 10.0175318  |                |        |
| ENSG00000134108                     | 2041.314673                                            | 2017.788949 | 1932.061122    |        |
| 2844.769487                         | 2558.083187                                            | 2091.037046 | 1997.054915    |        |
| 2497.96324                          | -0.322397658                                           | 0.033897065 | 0.164095562    | ARL8B  |
| 3                                   | 5122220 5180912                                        | + 3576      | protein_coding | ADP    |
| ribosylation factor like GTPase     | 8B [Source:HGNC                                        |             |                |        |
| Symbol;Acc:HGNC:25564]              | -                                                      | 2250 2280   | 1662 2746      | 2241   |
| 2424                                | 30.8115603                                             | 30.21090795 | 28.91614248    |        |
| 42.66925561                         | 38.52048146                                            | 31.51854229 |                |        |
| ENSG00000185115                     | 573.3826105                                            | 597.3717284 | 595.1957247    |        |
| 629.8688449                         | 842.4209692                                            | 872.9907138 | 588.6500212    |        |
| 781.760176                          | -0.409672645                                           | 0.033928347 | 0.164202061    | NSMCE3 |
| 15                                  | 29264992                                               | 29269829    | - 4838         |        |
| protein_coding                      | "NSE3 homolog, SMC5-SMC6 complex component             |             |                |        |
| [Source:HGNC Symbol;Acc:HGNC:7677]" | -                                                      | 632 675     |                | 512    |
| 608                                 | 738 1012                                               | 6.397052248 | 6.610957263    |        |
| 6.584320212                         | 6.98312408                                             | 9.376437389 | 9.726255336    |        |
| ENSG00000145337                     | 1110.475182                                            | 1606.266203 | 1233.403641    |        |
| 1112.630164                         | 934.8818073                                            | 976.5073993 | 1316.715009    |        |
| 1008.006457                         | 0.385718694                                            | 0.033938962 | 0.164208508    | PYURF  |
| 4                                   | 88520985                                               | 88523813    | - 1361         |        |
| protein_coding                      | PIGY upstream reading frame [Source:HGNC               |             |                |        |
| Symbol;Acc:HGNC:44317]              | -                                                      | 1224 1815   | 1061 1074      | 819    |
| 1132                                | 44.04047315                                            | 63.18950379 | 48.50249787    |        |
| 43.84884919                         | 36.98904654                                            | 38.6740202  |                |        |
| ENSG00000185716                     | 430.9442088                                            | 392.937848  | 325.497662     |        |
| 444.4304843                         | 638.0939319                                            | 522.7592614 | 383.1265729    |        |
| 535.0945592                         | -0.480077814                                           | 0.033971553 | 0.164321248    | MOSMO  |
| 16                                  | 22007638                                               | 22087534    | + 6122         |        |
| protein_coding                      | modulator of smoothened [Source:HGNC                   |             |                |        |
| Symbol;Acc:HGNC:27087]              | -                                                      | 475 444     | 280 429        | 559    |
| 606                                 | 3.799522039                                            | 3.436497922 | 2.845584933    |        |
| 3.893821247                         | 5.612622628                                            | 4.602675075 |                |        |
| ENSG00000173272                     | 679.5309735                                            | 985.8846006 | 1136.916834    |        |
| 663.0198367                         | 664.348244                                             | 734.1058275 | 934.1108026    |        |
| 687.1579694                         | 0.441716243                                            | 0.034117806 | 0.16498356     | MZT2A  |
| 2                                   | 131464900                                              | 131492743   | - 4093         |        |

|                                      |                                                    |             |             |             |       |             |
|--------------------------------------|----------------------------------------------------|-------------|-------------|-------------|-------|-------------|
| protein_coding                       | mitotic spindle organizing protein 2A [Source:HGNC |             |             |             |       |             |
| Symbol;Acc:HGNC:33187]               | -                                                  | 749         | 1114        | 978         | 640   | 582         |
| 851                                  | 8.961253368                                        | 12.89644134 |             | 14.86633643 |       |             |
| 8.688609384                          | 8.740345497                                        | 9.667603574 |             |             |       |             |
| ENSG00000164096                      | 1079.62865                                         | 1147.838714 |             | 1345.002839 |       |             |
| 1500.082381                          | 1504.48623                                         | 1472.52485  |             | 1190.823401 |       |             |
| 1492.364487                          | -0.326373406                                       | 0.034128997 |             | 0.164992574 |       | C4orf3      |
| 4                                    | 119296419                                          | 119304445   |             | -           | 3148  |             |
| protein_coding                       | chromosome 4 open reading frame 3 [Source:HGNC     |             |             |             |       |             |
| Symbol;Acc:HGNC:19225]               | -                                                  | 1190        | 1297        | 1157        | 1448  | 1318        |
| 1707                                 | 18.51147058                                        | 19.52233196 |             | 22.86680466 |       |             |
| 25.55911911                          | 25.73522957                                        | 25.21330721 |             |             |       |             |
| ENSG00000100387                      | 815.6186184                                        | 895.615095  |             | 1019.505177 |       |             |
| 794.5878356                          | 713.4323926                                        | 521.0339833 |             | 910.2462968 |       |             |
| 676.3514038                          | 0.429022653                                        | 0.03415147  |             | 0.165056108 |       | RBX1        |
| 22                                   | 40951347                                           | 40973309    |             | +           | 3092  |             |
| protein_coding                       | ring-box 1 [Source:HGNC Symbol;Acc:HGNC:9928]      |             |             |             |       | -           |
| 899                                  | 1012                                               | 877         | 767         | 625         | 604   | 14.23799677 |
|                                      | 15.50841693                                        | 17.64684027 | 13.78376697 |             |       | 12.42475667 |
|                                      | 9.082982376                                        |             |             |             |       |             |
| ENSG00000022267                      | 1871.658743                                        | 1702.730675 |             | 1986.69823  |       |             |
| 1772.542095                          | 1412.025391                                        | 905.7709975 |             | 1853.695882 |       |             |
| 1363.446161                          | 0.443671911                                        | 0.034176499 |             | 0.165131956 |       | FHL1        |
| X                                    | 136146702                                          | 136211359   |             | +           | 5997  |             |
| protein_coding                       | four and a half LIM domains 1 [Source:HGNC         |             |             |             |       |             |
| Symbol;Acc:HGNC:3702]                | -                                                  | 2063        | 1924        | 1709        | 1711  | 1237        |
| 1050                                 | 16.84588621                                        | 15.20188559 |             | 17.73025005 |       |             |
| 15.85360394                          | 12.67894188                                        | 8.141159592 |             |             |       |             |
| ENSG00000072121                      | 672.2729658                                        | 540.7320386 |             | 518.4712759 |       |             |
| 857.7819138                          | 648.3673584                                        | 815.1938978 |             | 577.1587601 |       |             |
| 773.7810567                          | -0.422828594                                       | 0.0342052   |             | 0.165225499 |       |             |
| ZFYVE26 14                           | 67727374                                           | 67816590    |             | -           | 15706 |             |
| protein_coding                       | zinc finger FYVE-type containing 26 [Source:HGNC   |             |             |             |       |             |
| Symbol;Acc:HGNC:20761]               | -                                                  | 741         | 611         | 446         | 828   | 568         |
| 945                                  | 2.310368733                                        | 1.843325614 |             | 1.766754118 |       |             |
| 2.929387252                          | 2.22295209                                         | 2.797674816 |             |             |       |             |
| ENSG00000057019                      | 11325.21381                                        | 10474.80263 |             | 11235.4818  |       |             |
| 10937.75537                          | 7735.89012                                         | 7833.62517  |             | 11011.83275 |       |             |
| 8835.756886                          | 0.317633904                                        | 0.034251542 |             | 0.165404186 |       | DCBLD2      |
| 3                                    | 98795941                                           | 98901689    |             | -           | 11274 |             |
| protein_coding                       | "discoidin, CUB and LCCL domain containing 2       |             |             |             |       |             |
| [Source:HGNC Symbol;Acc:HGNC:24627]" | -                                                  |             |             | 12483       | 11836 | 9665        |
| 10558                                | 6777                                               | 9081        | 54.22126225 | 49.74545034 |       |             |
| 53.33725666                          | 52.03740977                                        | 36.94935106 |             | 37.45300455 |       |             |
| ENSG00000115368                      | 1810.872928                                        | 1623.966106 |             | 1456.602037 |       |             |
| 2089.548454                          | 2084.364078                                        | 1901.256456 |             | 1630.480357 |       |             |
| 2025.056329                          | -0.311949185                                       | 0.034305269 |             | 0.165618421 |       | WDR75       |
| 2                                    | 189441433                                          | 189475565   |             | +           | 5066  |             |
| protein_coding                       | WD repeat domain 75 [Source:HGNC                   |             |             |             |       |             |
| Symbol;Acc:HGNC:25725]               | -                                                  | 1996        | 1835        | 1253        | 2017  | 1826        |

|                                     |                                                    |              |                  |             |        |
|-------------------------------------|----------------------------------------------------|--------------|------------------|-------------|--------|
|                                     | 2204                                               | 19.29407823  | 17.16316288      | 15.38837397 |        |
| 22.12344507                         |                                                    | 22.15557103  | 20.22914013      |             |        |
| ENSG00000141030                     |                                                    | 3505.617733  | 3739.104522      | 3643.248831 |        |
| 4348.995742                         |                                                    | 4518.024656  | 4147.56853       | 3629.323695 |        |
| 4338.196309                         |                                                    | -0.257273374 | 0.034364696      | 0.165860059 | COP53  |
|                                     | 17                                                 | 17246820     | 17281293         | - 2788      |        |
| protein_coding                      | COP9 signalosome subunit 3 [Source:HGNC            |              |                  |             |        |
| Symbol;Acc:HGNC:2239]               | -                                                  | 3864         | 4225             | 3134 4198   | 3958   |
|                                     | 4808                                               | 67.86924717  | 71.80594212      | 69.93797755 |        |
| 83.6684471                          |                                                    | 87.26304846  | 80.18676772      |             |        |
| ENSG00000267353                     |                                                    | 8.165258694  | 15.0449176       | 0 0 0       |        |
|                                     | 0                                                  | 7.736725432  | 0 5.389355304    | 0.034389254 |        |
|                                     | 1                                                  | AC020928.2   | 19 36773712      | 36775908    |        |
|                                     | -                                                  | 2197 lincRNA | novel transcript | -           | 9      |
|                                     | 17                                                 | 0 0          | 0 0              | 0.200604715 |        |
| 0.36664461                          |                                                    | 0 0          | 0 0              |             |        |
| ENSG00000186577                     |                                                    | 876.4044331  | 1277.048006      | 1326.402973 |        |
| 1179.968116                         |                                                    | 1638.040773  | 1910.745485      | 1159.951804 |        |
| 1576.251458                         |                                                    | -0.443197313 | 0.034445416      | 0.166203991 | SMIM29 |
|                                     | 6                                                  | 34246380     | 34249470         | - 2229      |        |
| protein_coding                      | small integral membrane protein 29 [Source:HGNC    |              |                  |             |        |
| Symbol;Acc:HGNC:1340]               | -                                                  | 966          | 1443             | 1141 1139   | 1435   |
|                                     | 2215                                               | 21.22246087  | 30.67486806      | 31.84801892 |        |
| 28.39394255                         |                                                    | 39.57210865  | 46.20560703      |             |        |
| ENSG00000198042                     |                                                    | 1818.130936  | 1923.094468      | 1540.301436 |        |
| 2269.806972                         |                                                    | 2040.987389  | 2244.586796      | 1760.508947 |        |
| 2185.127052                         |                                                    | -0.311299195 | 0.034461078      | 0.166203991 | MAK16  |
|                                     | 8                                                  | 33484750     | 33501260         | + 4846      |        |
| protein_coding                      | MAK16 homolog [Source:HGNC Symbol;Acc:HGNC:13703]  |              |                  |             |        |
|                                     | -                                                  | 2004 2173    | 1325 2191        | 1788 2602   |        |
| 20.2508376                          |                                                    | 21.24725144  | 17.01137096      | 25.12297183 |        |
| 22.67939499                         |                                                    | 24.96634115  |                  |             |        |
| ENSG00000237624                     |                                                    | 61.69306569  | 65.48964133      | 62.77454909 |        |
| 30.04308635                         |                                                    | 35.38624667  | 5.175834272      | 63.31908537 |        |
| 23.53505577                         |                                                    | 1.439163015  | 0.034464144      | 0.166203991 |        |
| OXCT2P1 1                           |                                                    | 39514956     | 39516490         | + 1535      |        |
| unprocessed_pseudogene              | 3-oxoacid CoA-transferase 2 pseudogene 1           |              |                  |             |        |
| [Source:HGNC Symbol;Acc:HGNC:21627] | -                                                  |              |                  | 68 74       | 54     |
|                                     | 29                                                 | 31 6         | 2.169347953      | 2.284282332 |        |
| 2.188730181                         |                                                    | 1.049788139  | 1.241368367      | 0.181749778 |        |
| ENSG00000100528                     |                                                    | 2119.338257  | 2369.132025      | 2529.58183  |        |
| 2777.431535                         |                                                    | 2756.702765  | 3039.939996      | 2339.350704 |        |
| 2858.024765                         |                                                    | -0.289404967 | 0.034521112      | 0.166433346 | CNIH1  |
|                                     | 14                                                 | 54423560     | 54441431         | - 5060      |        |
| protein_coding                      | cornichon family AMPA receptor auxiliary protein 1 |              |                  |             |        |
| [Source:HGNC Symbol;Acc:HGNC:19431] | -                                                  |              |                  | 2336 2677   | 2176   |
|                                     | 2681                                               | 2415 3524    | 22.60742013      | 25.06826605 |        |
| 26.75563242                         |                                                    | 29.44139207  | 29.33688365      | 32.38294938 |        |
| ENSG00000143155                     |                                                    | 2139.297778  | 2239.037737      | 2261.046259 |        |
| 2565.057993                         |                                                    | 2693.920714  | 2756.13175       | 2213.127258 |        |

|                                                                     |                                                 |                          |                |            |
|---------------------------------------------------------------------|-------------------------------------------------|--------------------------|----------------|------------|
| 2671.703486                                                         | -0.271838943                                    | 0.034544509              | 0.166500766    | TIPRL      |
| 1                                                                   | 168178933                                       | 168202114                | + 3220         |            |
| protein_coding                                                      | TOR signaling pathway regulator [Source:HGNC    |                          |                |            |
| Symbol;Acc:HGNC:30231]                                              | -                                               | 2358 2530                | 1945 2476      | 2360       |
| 3195                                                                | 35.86052246                                     | 37.22983319              | 37.58119456    |            |
| 42.72743403                                                         | 45.05090207                                     | 46.13664489              |                |            |
| ENSG00000145979                                                     | 567.0318537                                     | 692.0662097              | 745.1571476    |            |
| 725.1779464                                                         | 958.8531357                                     | 989.4469849              | 668.0850704    |            |
| 891.1593557                                                         | -0.416597808                                    | 0.034591234              | 0.16668056     | TBC1D7     |
| 6                                                                   | 13266542                                        | 13328583                 | - 8300         |            |
| protein_coding                                                      | TBC1 domain family member 7 [Source:HGNC        |                          |                |            |
| Symbol;Acc:HGNC:21066]                                              | -                                               | 625 782                  | 641 700        | 840        |
| 1147                                                                | 3.687487939                                     | 4.464317785              | 4.804926887    |            |
| 4.686320547                                                         | 6.22083316                                      | 6.42563931               |                |            |
| ENSG00000256742                                                     | 0 0                                             | 0 6.215810969            | 17.12237742    |            |
| 0                                                                   | 0                                               | 7.779396131              | -5.430588322   | 0.03460819 |
| 0.166716849                                                         | AC145422.1                                      | 12                       | 121580792      |            |
| 121593504                                                           | + 544                                           | lincRNA novel transcript |                | -          |
| 0                                                                   | 0 0                                             | 6 15                     | 0 0            | 0          |
| 0                                                                   | 0.612864399                                     | 1.694882984              | 0              |            |
| ENSG00000132604                                                     | 1122.269445                                     | 1134.563786              | 967.1930527    |            |
| 1240.054288                                                         | 1293.310241                                     | 1581.21737               | 1074.675428    |            |
| 1371.5273                                                           | -0.351862845                                    | 0.034619297              | 0.166724952    | TERF2      |
| 16                                                                  | 69355561                                        | 69408571                 | - 5621         |            |
| protein_coding                                                      | telomeric repeat binding factor 2 [Source:HGNC  |                          |                |            |
| Symbol;Acc:HGNC:11729]                                              | MYB                                             | 1237 1282                | 832 1197       | 1133       |
| 1833                                                                | 10.7766753                                      | 10.80689373              | 9.209087249    |            |
| 11.83293854                                                         | 12.38978256                                     | 15.16281715              |                |            |
| ENSG00000068745                                                     | 812.8968655                                     | 908.0050271              | 919.5308951    |            |
| 549.0633023                                                         | 652.9333257                                     | 791.0400045              | 880.1442626    |            |
| 664.3455442                                                         | 0.404631391                                     | 0.034633152              | 0.16674628     | IP6K2      |
| 3                                                                   | 48688003                                        | 48740353                 | - 5624         |            |
| protein_coding                                                      | inositol hexakisphosphate kinase 2 [Source:HGNC |                          |                |            |
| Symbol;Acc:HGNC:17313]                                              | -                                               | 896 1026                 | 791 530        | 572        |
| 917                                                                 | 7.801738352                                     | 8.644273307              | 8.750603746    |            |
| 5.236518006                                                         | 6.251699246                                     | 7.581498298              |                |            |
| ENSG00000172482                                                     | 0 0                                             | 0 0                      | 9.131934625    |            |
| 13.80222472                                                         | 0 7.644719783                                   | -5.412249316             | 0.034637553    |            |
| 1                                                                   | AGXT 2                                          | 240868479                | 240880502      | +          |
| 4459                                                                | protein_coding alanine--glyoxylate and serine-- |                          |                |            |
| pyruvate aminotransferase [Source:HGNC                              | Symbol;Acc:HGNC:341]                            |                          |                | -          |
| 0                                                                   | 0 0                                             | 0 8                      | 16 0           | 0          |
| 0                                                                   | 0 0.110280792                                   | 0.166845128              |                |            |
| ENSG00000213859                                                     | 305.7435755                                     | 323.0232309              | 519.6337675    |            |
| 273.4956827                                                         | 255.6941695                                     | 244.1268498              | 382.8001913    |            |
| 257.772234                                                          | 0.568489345                                     | 0.034753368              | 0.167281048    | KCTD11     |
| 17                                                                  | 7351889 7354944                                 | + 3056                   | protein_coding |            |
| potassium channel tetramerization domain containing 11 [Source:HGNC | Symbol;Acc:HGNC:21302]                          |                          |                | -          |
| 283                                                                 | 5.400142678                                     | 5.659342206              | 9.100411275    | 224        |

|                        |                                                    |             |             |                   |      |                |
|------------------------|----------------------------------------------------|-------------|-------------|-------------------|------|----------------|
| 4.800236342            | 4.505489985                                        | 4.305901628 |             |                   |      |                |
| ENSG00000171612        | 873.6826802                                        | 826.585473  | 624.258016  |                   |      |                |
| 1020.428967            | 995.3808742                                        | 1017.051434 | 774.8420564 |                   |      |                |
| 1010.953759            | -0.382473606                                       | 0.034839297 | 0.167647533 |                   |      |                |
| SLC25A33               | 1                                                  | 9539482     | 9585179     | +                 | 3854 | protein_coding |
|                        | solute carrier family 25 member 33 [Source:HGNC    |             |             |                   |      |                |
| Symbol;Acc:HGNC:29681] | -                                                  | 963         | 934         | 537               | 985  | 872            |
| 1179                   | 12.23610684                                        | 11.48316504 | 8.669008364 |                   |      |                |
| 14.2015767             | 13.90759819                                        | 14.22437237 |             |                   |      |                |
| ENSG00000018510        | 2770.74445                                         | 2337.272199 | 2638.856045 |                   |      |                |
| 2520.511348            | 1793.283662                                        | 1721.827534 | 2582.290898 |                   |      |                |
| 2011.874182            | 0.360197612                                        | 0.03485266  | 0.167666224 |                   |      | AGPS           |
| 2                      | 177392644                                          | 177559299   | +           | 8965              |      |                |
| protein_coding         | alkylglycerone phosphate synthase [Source:HGNC     |             |             |                   |      |                |
| Symbol;Acc:HGNC:327]   | -                                                  | 3054        | 2641        | 2270              | 2433 | 1571           |
| 1996                   | 16.68197332                                        | 13.95868633 | 15.75369416 |                   |      |                |
| 15.0800874             | 10.77142722                                        | 10.35240517 |             |                   |      |                |
| ENSG00000104343        | 596.0638846                                        | 638.9665006 | 650.9953239 |                   |      |                |
| 817.3791425            | 873.2412486                                        | 744.4574961 | 628.6752364 |                   |      |                |
| 811.692629             | -0.368308369                                       | 0.034910813 | 0.167900319 |                   |      | UBE2W          |
| 8                      | 73780097                                           | 73878910    | -           | 9090              |      |                |
| protein_coding         | ubiquitin conjugating enzyme E2 W [Source:HGNC     |             |             |                   |      |                |
| Symbol;Acc:HGNC:25616] | -                                                  | 657         | 722         | 560               | 789  | 765            |
| 863                    | 3.539404265                                        | 3.763567895 | 3.832930905 |                   |      |                |
| 4.823087752            | 5.173028989                                        | 4.414463503 |             |                   |      |                |
| ENSG00000206337        | 22.68127415                                        | 5.309970919 | 17.43737475 |                   |      | 0              |
| 4.565967313            | 0                                                  | 15.14287327 | 1.521989104 |                   |      |                |
| 3.372880918            | 0.034955592                                        | 0.168069182 | HCP5        | 6                 |      |                |
| 31400702               | 31477506                                           | +           | 3138        | sense_overlapping |      |                |
|                        | HLA complex P5 [Source:HGNC Symbol;Acc:HGNC:21659] |             |             |                   |      |                |
| 25                     | 6                                                  | 15          | 0           | 4                 | 0    | 0.390135754    |
| 0.090599281            | 0.297402878                                        | 0           | 0.07835278  |                   |      | 0              |
| ENSG00000011243        | 806.5461088                                        | 815.080536  | 934.6432865 |                   |      |                |
| 936.5155194            | 1124.369451                                        | 1239.612308 | 852.0899771 |                   |      |                |
| 1100.165759            | -0.369684248                                       | 0.034964927 | 0.168069182 |                   |      | AKAP8L         |
| 19                     | 15380048                                           | 15419141    | -           | 5081              |      |                |
| protein_coding         | A-kinase anchoring protein 8 like [Source:HGNC     |             |             |                   |      |                |
| Symbol;Acc:HGNC:29857] | -                                                  | 889         | 921         | 804               | 904  | 985            |
| 1437                   | 8.568035349                                        | 8.588886746 | 9.844954208 |                   |      |                |
| 9.886242958            | 11.91610704                                        | 13.15038874 |             |                   |      |                |
| ENSG00000075399        | 507.15329                                          | 740.7409432 | 402.2221109 |                   |      |                |
| 642.3004668            | 849.2699202                                        | 847.9741815 | 550.0387813 |                   |      |                |
| 779.8481895            | -0.50213413                                        | 0.034976735 | 0.168080269 |                   |      | VPS9D1         |
| 16                     | 89707134                                           | 89720986    | -           | 3428              |      |                |
| protein_coding         | VPS9 domain containing 1 [Source:HGNC              |             |             |                   |      |                |
| Symbol;Acc:HGNC:13526] | -                                                  | 559         | 837         | 346               | 620  | 744            |
| 983                    | 7.985455212                                        | 11.56940663 | 6.279746783 |                   |      |                |
| 10.04992729            | 13.34072655                                        | 13.33348641 |             |                   |      |                |
| ENSG00000231908        | 2.721752898                                        | 15.0449176  | 2.3249833   |                   |      | 0              |
| 0                      | 0                                                  | 6.697217934 | 0           | 5.180689107       |      |                |

|                                     |                                          |              |                      |                      |             |             |
|-------------------------------------|------------------------------------------|--------------|----------------------|----------------------|-------------|-------------|
| 0.035020192                         | 1                                        | IDH1-AS1     | 2                    | 208255247            |             |             |
| 208256181                           | +                                        | 655          | antisense            | IDH1 antisense RNA 1 |             |             |
| [Source:HGNC Symbol;Acc:HGNC:40292] |                                          |              | -                    | 3                    | 17          | 2           |
| 0                                   | 0                                        | 0            | 0.224289343          | 1.229798792          |             |             |
| 0.189974602                         | 0                                        | 0            | 0                    |                      |             |             |
| ENSG00000232729                     | 4.53625483                               | 8.849951531  | 5.812458249          | 0                    |             |             |
| 0                                   | 0                                        | 6.39955487   | 0                    | 5.111776013          |             |             |
| 0.035059597                         | 1                                        | AC211433.1   | 7                    | 74688939             |             |             |
| 74729001                            | -                                        | 2847         | processed_transcript |                      |             |             |
| uncharacterized LOC101926943        | [Source:NCBI gene;Acc:101926943]         |              |                      |                      |             | -           |
| 5                                   | 10                                       | 5            | 0                    | 0                    | 0.086002529 |             |
| 0.166432821                         | 0.109267092                              | 0            | 0                    | 0                    | 0           |             |
| ENSG00000272341                     | 21.77402318                              | 16.81490791  | 26.73730795          | 0                    |             |             |
| 9.131934625                         | 0                                        | 21.77541301  | 3.043978208          |                      |             |             |
| 2.879716541                         | 0.03506777                               | 0.168471968  | AL137003.2           | 6                    |             |             |
| 16764346                            | 16766883                                 | +            | 2538                 | lincRNA novel        |             |             |
| transcript                          | -                                        | 24           | 19                   | 23                   | 0           | 8           |
| 0.463071771                         | 0.354722245                              | 0.563823359  | 0                    |                      |             |             |
| 0.193751793                         | 0                                        |              |                      |                      |             |             |
| ENSG00000113161                     | 1567.729669                              | 1497.411799  | 1628.650801          |                      |             |             |
| 1395.449563                         | 1253.358027                              | 1087.787836  | 1564.597423          |                      |             |             |
| 1245.531809                         | 0.329326148                              | 0.03511714   | 0.16866224           | HMGR                 |             |             |
| 5                                   | 75336329                                 | 75362104     | +                    | 6215                 |             |             |
| protein_coding                      | 3-hydroxy-3-methylglutaryl-CoA reductase | [Source:HGNC |                      |                      |             |             |
| Symbol;Acc:HGNC:5006]               | -                                        | 1728         | 1692                 | 1401                 | 1347        | 1098        |
| 1261                                | 13.61542771                              | 12.89987989  | 14.02503162          |                      |             |             |
| 12.04310593                         | 10.85946844                              | 9.434197674  |                      |                      |             |             |
| ENSG00000121211                     | 283.9695524                              | 236.2937059  | 322.010187           |                      |             |             |
| 278.6755251                         | 113.007691                               | 75.91223598  | 280.7578151          |                      |             |             |
| 155.8651507                         | 0.850001345                              | 0.035126445  | 0.16866224           | MND1                 |             |             |
| 4                                   | 153344649                                | 153415118    | +                    | 1511                 |             |             |
| protein_coding                      | meiotic nuclear divisions 1              | [Source:HGNC |                      |                      |             |             |
| Symbol;Acc:HGNC:24839]              | -                                        | 313          | 267                  | 277                  | 269         | 99          |
| 88                                  | 10.14398403                              | 8.372848592  | 11.40570544          |                      |             |             |
| 9.892358784                         | 4.027338098                              | 2.708003529  |                      |                      |             |             |
| ENSG00000137857                     | 19.05227029                              | 10.61994184  | 19.76235805          |                      |             |             |
| 5.179842475                         | 0                                        | 1.725278091  | 16.47819006          | 2.301706855          |             |             |
| 2.830460458                         | 0.035146212                              | 0.168680355  | DUOX1                | 15                   |             |             |
| 45129933                            | 45165576                                 | +            | 8784                 | protein_coding       |             |             |
| dual oxidase 1                      | [Source:HGNC Symbol;Acc:HGNC:3062]       |              |                      |                      |             | -           |
| 21                                  | 12                                       | 17           | 5                    | 0                    | 2           | 0.117072705 |
| 0.064731454                         | 0.120410245                              | 0.03162931   | 0                    |                      |             |             |
| 0.010586897                         |                                          |              |                      |                      |             |             |
| ENSG00000144566                     | 1555.028156                              | 1490.331838  | 1637.950735          |                      |             |             |
| 2074.008927                         | 1882.320025                              | 1803.778244  | 1561.103576          |                      |             |             |
| 1920.035732                         | -0.29870646                              | 0.035154616  | 0.168680355          | RAB5A                |             |             |
| 3                                   | 19947079                                 | 19985175     | +                    | 3785                 |             |             |
| protein_coding                      | "RAB5A, member RAS oncogene family       | [Source:HGNC |                      |                      |             |             |
| Symbol;Acc:HGNC:9783]"              | -                                        | 1714         | 1684                 | 1409                 | 2002        | 1649        |
| 2091                                | 22.17551003                              | 21.08155511  | 23.16071465          |                      |             |             |

|                                                                                               |              |             |             |                  |     |             |
|-----------------------------------------------------------------------------------------------|--------------|-------------|-------------|------------------|-----|-------------|
| 29.39072051                                                                                   | 26.77947953  | 25.68734195 |             |                  |     |             |
| ENSG00000163701                                                                               | 15.42326642  | 27.43484975 | 17.43737475 |                  |     |             |
| 62.15810969                                                                                   | 45.65967313  | 43.99459131 | 20.09849697 |                  |     |             |
| 50.60412471                                                                                   | -1.328431235 | 0.035168339 | 0.168680355 | IL17RE           |     |             |
| 3                                                                                             | 9902612      | 9916402 +   | 4676        | protein_coding   |     |             |
| interleukin 17 receptor E [Source:HGNC Symbol;Acc:HGNC:18439]                                 |              |             |             |                  | -   |             |
| 17                                                                                            | 31           | 15          | 60          | 40               | 51  | 0.178034063 |
|                                                                                               | 0.314133051  | 0.199583026 | 0.712998788 |                  |     | 0.525814852 |
|                                                                                               | 0.507138628  |             |             |                  |     |             |
| ENSG00000176624                                                                               | 975.2947884  | 918.6249689 | 1174.116566 |                  |     |             |
| 832.9186699                                                                                   | 833.2890346  | 699.6002657 | 1022.678775 |                  |     |             |
| 788.6026567                                                                                   | 0.374833978  | 0.035168362 | 0.168680355 | MEX3C            |     |             |
| 18                                                                                            | 51174550     | 51218304    | -           | 7481             |     |             |
| protein_coding mex-3 RNA binding family member C [Source:HGNC Symbol;Acc:HGNC:28040]          |              |             |             |                  |     |             |
|                                                                                               | -            | 1075        | 1038        | 1010             | 804 | 730         |
| 811                                                                                           | 7.03683703   | 6.574521343 | 8.399792651 |                  |     |             |
| 5.971843771                                                                                   | 5.998056682  | 5.040715862 |             |                  |     |             |
| ENSG00000227627                                                                               | 6.350756762  | 2.654985459 | 10.46242485 | 0                |     |             |
| 0                                                                                             | 0            | 6.489389023 | 0           | 5.127413039      |     |             |
| 0.035191107                                                                                   | 1            | AL080276.2  | 6           | 152983331        |     |             |
| 152990541                                                                                     | +            | 2146        | antisense   | novel transcript |     |             |
| -                                                                                             | 7            | 3           | 9           | 0                | 0   |             |
| 0.159733867                                                                                   | 0.066239642  | 0.260927371 | 0           | 0                | 0   |             |
| ENSG00000100650                                                                               | 1514.201862  | 1715.120607 | 1419.402305 |                  |     |             |
| 1911.361873                                                                                   | 1964.507436  | 1865.888255 | 1549.574924 |                  |     |             |
| 1913.919188                                                                                   | -0.30404894  | 0.035199258 | 0.168782781 | SRSF5            |     |             |
| 14                                                                                            | 69726900     | 69772005    | +           | 5357             |     |             |
| protein_coding serine and arginine rich splicing factor 5 [Source:HGNC Symbol;Acc:HGNC:10787] |              |             |             |                  |     |             |
|                                                                                               | -            |             | 1669        | 1938             |     | 1221        |
| 1845                                                                                          | 1721         | 2163        | 15.25679721 | 17.1418846       |     |             |
| 14.18080432                                                                                   | 19.13756892  | 19.74724817 | 18.77439242 |                  |     |             |
| ENSG00000198393                                                                               | 615.1161549  | 707.1111273 | 527.7712091 |                  |     |             |
| 862.9617563                                                                                   | 708.8664253  | 881.6171043 | 616.6661638 |                  |     |             |
| 817.8150953                                                                                   | -0.406744159 | 0.035219227 | 0.168832768 | ZNF26            |     |             |
| 12                                                                                            | 132986365    | 133032952   | +           | 20863            |     |             |
| protein_coding zinc finger protein 26 [Source:HGNC Symbol;Acc:HGNC:13053]                     |              |             |             |                  |     |             |
|                                                                                               | zf-C2H2      | 678         | 799         | 454              | 833 | 621         |
| 1022                                                                                          | 1.591408302  | 1.814664996 | 1.353897984 |                  |     |             |
| 2.21860653                                                                                    | 1.829625491  | 2.277745283 |             |                  |     |             |
| ENSG00000143158                                                                               | 744.8530431  | 992.0795666 | 857.9188376 |                  |     |             |
| 982.0981332                                                                                   | 1142.63332   | 1250.826616 | 864.9504824 |                  |     |             |
| 1125.186023                                                                                   | -0.379674156 | 0.035268851 | 0.169024848 | MPC2             |     |             |
| 1                                                                                             | 167916729    | 167937040   | -           | 2552             |     |             |
| protein_coding mitochondrial pyruvate carrier 2 [Source:HGNC Symbol;Acc:HGNC:24515]           |              |             |             |                  |     |             |
|                                                                                               | -            | 821         | 1121        | 738              | 948 | 1001        |
| 1450                                                                                          | 15.75401195  | 20.8138003  | 17.99212826 |                  |     |             |
| 20.64142666                                                                                   | 24.11019748  | 26.41912017 |             |                  |     |             |
| ENSG00000232044                                                                               | 0.907250966  | 0           | 0           | 3.107905485      |     |             |
| 7.990442797                                                                                   | 12.93958568  | 0.302416989 |             |                  |     |             |
| 8.012644654                                                                                   | -4.519006038 | 0.035302044 | 0.169138098 |                  |     |             |



|                                     |             |                                     |             |                                                 |             |                    |             |
|-------------------------------------|-------------|-------------------------------------|-------------|-------------------------------------------------|-------------|--------------------|-------------|
| LINC01105                           | 2           | 5932687                             | 6001275     | +                                               | 8200        |                    |             |
| processed_transcript                |             | long                                | intergenic  | non-protein                                     | coding      | RNA                | 1105        |
| [Source:HGNC Symbol;Acc:HGNC:26403] |             | -                                   |             |                                                 | 1           | 0                  | 0           |
|                                     | 3           | 7                                   | 15          |                                                 | 0.005971932 | 0                  | 0           |
| 0.020329161                         |             | 0.052472475                         |             |                                                 | 0.08505668  |                    |             |
| ENSG00000264044                     | 9.979760626 |                                     | 8.849951531 |                                                 | 1.16249165  |                    | 0           |
|                                     | 0           | 0                                   | 6.664067936 |                                                 | 0           | 5.174032108        |             |
| 0.035319978                         |             | 1                                   | AC005726.2  |                                                 | 17          | 28633206           |             |
| 28635950                            |             | +                                   | 1515        |                                                 | antisense   | "novel transcript, |             |
| antisense to KIAA0100"              |             | -                                   |             |                                                 | 11          | 10                 | 1           |
|                                     | 0           | 0.355556593                         |             |                                                 | 0.312761875 |                    | 0.041067117 |
|                                     | 0           | 0                                   |             |                                                 |             |                    | 0           |
| ENSG00000128656                     | 582.4551202 |                                     | 474.3574021 |                                                 | 453.3717435 |                    |             |
| 427.8549884                         |             | 378.975287                          |             | 207.0333709                                     |             | 503.3947552        |             |
| 337.9545487                         |             | 0.577377578                         |             | 0.035349717                                     |             | 0.169320646        | CHN1        |
|                                     | 2           | 174799363                           |             | 175005369                                       |             | -                  | 4971        |
| protein_coding                      |             | chimerin 1                          |             | [Source:HGNC Symbol;Acc:HGNC:1943]              |             | -                  |             |
|                                     | 642         | 536                                 | 390         | 413                                             | 332         | 240                | 6.324409007 |
|                                     |             | 5.109136048                         |             | 4.881212227                                     |             | 4.616558383        | 4.105269577 |
|                                     |             | 2.244907737                         |             |                                                 |             |                    |             |
| ENSG00000129932                     | 1009.770325 |                                     | 1218.638326 |                                                 | 989.2803941 |                    |             |
| 1098.126605                         |             | 1435.99672                          |             | 1708.02531                                      |             | 1072.563015        |             |
| 1414.049545                         |             | -0.398832425                        |             | 0.035364336                                     |             | 0.169344815        | DOHH        |
|                                     | 19          | 3490822                             | 3500940     | -                                               | 2031        | protein_coding     |             |
| deoxyhypusine hydroxylase           |             |                                     |             | [Source:HGNC Symbol;Acc:HGNC:28662]             |             | -                  |             |
|                                     | 1113        | 1377                                | 851         | 1060                                            | 1258        | 1980               | 26.83576156 |
|                                     |             | 32.12554157                         |             | 26.06912673                                     |             | 29.00066693        | 38.07308583 |
|                                     |             | 45.33005907                         |             |                                                 |             |                    |             |
| ENSG00000226833                     | 6.350756762 |                                     | 1.769990306 |                                                 | 11.6249165  |                    | 0           |
|                                     | 0           | 0                                   | 6.581887856 |                                                 | 0           | 5.147011012        |             |
| 0.035380151                         |             | 1                                   | AC092164.1  |                                                 | 2           | 28708953           |             |
| 28736205                            |             | -                                   | 1438        |                                                 | antisense   | novel transcript   |             |
|                                     | -           | 7                                   | 2           | 10                                              | 0           | 0                  | 0           |
| 0.238378914                         |             | 0.065901842                         |             | 0.43266121                                      |             | 0                  | 0           |
| ENSG00000138316                     | 69.85832438 |                                     | 124.7843166 |                                                 | 145.3114562 |                    |             |
| 39.36680281                         |             | 43.37668947                         |             | 84.53862644                                     |             | 113.3180324        |             |
| 55.76070624                         |             | 1.015602744                         |             | 0.035410513                                     |             | 0.169520045        |             |
| ADAMTS14                            | 10          | 70672803                            |             | 70762441                                        |             | +                  | 5269        |
|                                     |             | protein_coding                      |             | ADAM metalloproteinase with thrombospondin type |             |                    |             |
| 1 motif                             | 14          | [Source:HGNC Symbol;Acc:HGNC:14899] |             | -                                               |             | 77                 | 141         |
|                                     | 125         | 38                                  | 98          | 0.715634403                                     |             | 1.267994457        |             |
|                                     |             | 1.476007829                         |             | 0.400744381                                     |             | 0.443305131        | 0.864826314 |
| ENSG00000072401                     | 585.1768731 |                                     | 715.9610789 |                                                 | 559.1584836 |                    |             |
| 763.5087807                         |             | 856.1188711                         |             | 814.3312587                                     |             | 620.0988118        |             |
| 811.3196369                         |             | -0.386750052                        |             | 0.035456176                                     |             | 0.16969272         | UBE2D1      |
|                                     | 10          | 58334975                            |             | 58370753                                        |             | +                  | 3486        |
| protein_coding                      |             | ubiquitin conjugating enzyme E2     |             | D1                                              |             | [Source:HGNC       |             |
| Symbol;Acc:HGNC:12474]              |             | -                                   |             | 645                                             | 809         | 481                | 737         |
|                                     | 944         | 9.06068465                          |             | 10.99632532                                     |             | 8.584688481        | 750         |
| 11.7476811                          |             | 13.22456029                         |             | 12.59144665                                     |             |                    |             |

|                                     |                                                      |             |             |               |
|-------------------------------------|------------------------------------------------------|-------------|-------------|---------------|
| ENSG00000166165                     | 233.1634983                                          | 192.0439482 | 159.261356  |               |
| 285.9273046                         | 334.4571057                                          | 254.4785184 | 194.8229342 |               |
| 291.6209762                         | -0.578742255                                         | 0.035586946 | 0.170272517 | CKB           |
| 14                                  | 103519659                                            | 103523111   | - 2669      |               |
| protein_coding                      | creatine kinase B [Source:HGNC Symbol;Acc:HGNC:1991] |             |             |               |
| -                                   | 257 217                                              | 137 276     | 293 295     |               |
| 4.715342389                         | 3.852455234                                          | 3.193587649 | 5.746091693 |               |
| 6.747865332                         | 5.139305805                                          |             |             |               |
| ENSG00000165650                     | 1244.748325                                          | 1288.552943 | 1179.929025 |               |
| 1638.902159                         | 1505.627721                                          | 1453.546791 | 1237.743431 |               |
| 1532.692224                         | -0.307890719                                         | 0.035606077 | 0.170317983 | PDZD8         |
| 10                                  | 117277274                                            | 117375467   | - 9881      |               |
| protein_coding                      | PDZ domain containing 8 [Source:HGNC                 |             |             |               |
| Symbol;Acc:HGNC:26974]              | -                                                    | 1372 1456   | 1015 1582   | 1319          |
| 1685                                | 6.799576991                                          | 6.982113695 | 6.391046679 |               |
| 8.896468052                         | 8.205239394                                          | 7.929211899 |             |               |
| ENSG00000100304                     | 1950.589577                                          | 2375.326991 | 1778.612224 |               |
| 2255.303413                         | 2714.467567                                          | 2714.725075 | 2034.842931 |               |
| 2561.498685                         | -0.331644221                                         | 0.035626043 | 0.170367417 | TTL12         |
| 22                                  | 43166622                                             | 43187133    | - 4622      |               |
| protein_coding                      | tubulin tyrosine ligase like 12 [Source:HGNC         |             |             |               |
| Symbol;Acc:HGNC:28974]              | -                                                    | 2150 2684   | 1530 2177   | 2378          |
| 3147                                | 22.77913363                                          | 27.51560151 | 20.59531014 |               |
| 26.17221815                         | 31.6249079                                           | 31.65904571 |             |               |
| ENSG00000257219                     | 53.52780699                                          | 40.70977704 | 8.137441549 |               |
| 85.98538508                         | 91.31934625                                          | 73.32431885 | 34.12500853 |               |
| 83.54301673                         | -1.281069081                                         | 0.035650699 | 0.170439249 |               |
| LINC02407                           | 12 76259839                                          | 76305131    | +           | 1201          |
| lincRNA                             | long intergenic non-protein coding RNA 2407          |             |             |               |
| [Source:HGNC Symbol;Acc:HGNC:53336] | -                                                    | 59          | 46          | 7             |
| 83                                  | 80 85                                                | 2.405679059 | 1.814852212 |               |
| 0.362628455                         | 3.840140627                                          | 4.094438383 | 3.29084128  |               |
| ENSG00000230733                     | 863.7029196                                          | 1023.939392 | 752.1320975 |               |
| 996.6016921                         | 1186.010009                                          | 1256.865089 | 879.9248031 |               |
| 1146.492264                         | -0.381079498                                         | 0.035733858 | 0.170771076 |               |
| AC092171.2                          | 7 5475804                                            | 5479811 +   | 3251        | lincRNA novel |
| transcript                          | - 952                                                | 1157 647    | 962         | 1039 1457     |
| 14.33998386                         | 16.86331025                                          | 12.38209574 | 16.44258691 |               |
| 19.6447243                          | 20.83884289                                          |             |             |               |
| ENSG00000279700                     | 12.70151352                                          | 22.12487883 | 17.43737475 |               |
| 6.215810969                         | 0 0                                                  | 17.4212557  | 2.07193699  |               |
| 3.082275548                         | 0.035739416                                          | 0.170771076 | AC131212.2  | 12            |
| 132565071                           | 132566425                                            | +           | 1355        | TEC novel     |
| transcript                          | - 14                                                 | 25 15       | 6 0         | 0             |
| 0.505961445                         | 0.874232916                                          | 0.688745557 | 0.246050357 |               |
| 0                                   | 0                                                    |             |             |               |
| ENSG00000177839                     | 11.79426256                                          | 19.46989337 | 23.249833   |               |
| 39.36680281                         | 55.93309958                                          | 45.7198694  | 18.17132964 |               |
| 47.0065906                          | -1.375932836                                         | 0.03577458  | 0.170892937 | PCDHB9        |
| 5                                   | 141187127                                            | 141191541   | + 4415      |               |

|                        |                                                |             |             |      |                |             |   |
|------------------------|------------------------------------------------|-------------|-------------|------|----------------|-------------|---|
| protein_coding         | protocadherin beta 9 [Source:HGNC              |             |             |      |                |             |   |
| Symbol;Acc:HGNC:8694]  | -                                              | 13          | 22          | 20   | 38             | 49          |   |
| 53                     | 0.144192054                                    | 0.236112192 | 0.281842274 |      |                |             |   |
| 0.478260961            | 0.682201598                                    | 0.558182453 |             |      |                |             |   |
| ENSG00000164402        | 1679.321538                                    | 1796.540161 | 1658.875584 |      |                |             |   |
| 1450.355893            | 1421.157326                                    | 1303.447597 | 1711.579094 |      |                |             |   |
| 1391.653605            | 0.299012437                                    | 0.035821263 | 0.171025405 |      |                | 8-Sep       |   |
| 5                      | 132750817                                      | 132807241   | -           | 7711 |                |             |   |
| protein_coding         | septin 8 [Source:HGNC Symbol;Acc:HGNC:16511]   |             |             |      |                |             | - |
| 1851                   | 2030                                           | 1427        | 1400        | 1245 | 1511           | 11.75504779 |   |
| 12.47417337            | 11.51383805                                    | 10.08856453 | 9.924439955 |      |                |             |   |
| 9.111392999            |                                                |             |             |      |                |             |   |
| ENSG00000146535        | 5040.686367                                    | 4794.018744 | 5556.710086 |      |                |             |   |
| 4412.18982             | 4256.623027                                    | 4180.348813 | 5130.471733 |      |                |             |   |
| 4283.053887            | 0.260295303                                    | 0.035821648 | 0.171025405 |      |                | GNA12       |   |
| 7                      | 2728112                                        | 2844324     | -           | 6120 | protein_coding | G           |   |
| protein subunit        | alpha 12 [Source:HGNC Symbol;Acc:HGNC:4380]    |             |             |      |                |             | - |
| 5556                   | 5417                                           | 4780        | 4259        | 3729 | 4846           | 44.45693302 |   |
| 41.9405242             | 48.59407516                                    | 38.66947373 | 37.45314754 |      |                |             |   |
| 36.81823843            |                                                |             |             |      |                |             |   |
| ENSG00000077684        | 1029.729846                                    | 861.100284  | 1066.004843 |      |                |             |   |
| 843.2783549            | 662.0652603                                    | 769.4740284 | 985.6116578 |      |                |             |   |
| 758.2725479            | 0.377378621                                    | 0.035978065 | 0.171725845 |      |                | JADE1       |   |
| 4                      | 128809623                                      | 128875224   | +           | 9129 |                |             |   |
| protein_coding         | jade family PHD finger 1 [Source:HGNC          |             |             |      |                |             |   |
| Symbol;Acc:HGNC:30027] | -                                              | 1135        | 973         | 917  | 814            | 580         |   |
| 892                    | 6.088374215                                    | 5.050287173 | 6.249610844 |      |                |             |   |
| 4.954652971            | 3.905279725                                    | 4.543313083 |             |      |                |             |   |
| ENSG00000102271        | 289.4130581                                    | 192.9289434 | 291.7854041 |      |                |             |   |
| 169.8988332            | 190.6291353                                    | 142.3354425 | 258.0424686 |      |                |             |   |
| 167.621137             | 0.623053191                                    | 0.035992959 | 0.171750592 |      |                | KLHL4       |   |
| X                      | 87517749                                       | 87670050    | +           | 5818 |                |             |   |
| protein_coding         | kelch like family member 4 [Source:HGNC        |             |             |      |                |             |   |
| Symbol;Acc:HGNC:6355]  | -                                              | 319         | 218         | 251  | 164            | 167         |   |
| 165                    | 2.685008406                                    | 1.775453153 | 2.684150427 |      |                |             |   |
| 1.566326064            | 1.764371827                                    | 1.318685544 |             |      |                |             |   |
| ENSG00000175820        | 16.33051739                                    | 7.079961225 | 1.16249165  |      |                |             |   |
| 20.7193699             | 36.5277385                                     | 40.54403513 | 8.190990087 |      |                |             |   |
| 32.59704784            | -1.975492386                                   | 0.03600437  | 0.171756929 |      |                |             |   |
| CCDC168                | 13                                             | 102729369   | 102759070   | -    | 21466          |             |   |
| protein_coding         | coiled-coil domain containing 168 [Source:HGNC |             |             |      |                |             |   |
| Symbol;Acc:HGNC:26851] | -                                              | 18          | 8           | 1    | 20             | 32          |   |
| 47                     | 0.041062942                                    | 0.017658967 | 0.002898383 |      |                |             |   |
| 0.05177152             | 0.091631799                                    | 0.101807026 |             |      |                |             |   |
| ENSG00000136628        | 5116.895448                                    | 4522.325232 | 5382.336339 |      |                |             |   |
| 4891.843233            | 3608.255669                                    | 3447.968264 | 5007.185673 |      |                |             |   |
| 3982.689055            | 0.330232986                                    | 0.036018202 | 0.171756929 |      |                | EPRS        |   |
| 1                      | 219968601                                      | 220046658   | -           | 5450 |                |             |   |
| protein_coding         | glutamyl-prolyl-tRNA synthetase [Source:HGNC   |             |             |      |                |             |   |
| Symbol;Acc:HGNC:3418]  | -                                              | 5640        | 5110        | 4630 | 4722           | 3161        |   |

|                                      |                                                       |             |             |                 |              |
|--------------------------------------|-------------------------------------------------------|-------------|-------------|-----------------|--------------|
|                                      | 3997                                                  | 50.67704526 | 44.42739393 | 52.85563994     |              |
| 48.14392836                          |                                                       | 35.65129861 | 34.10112166 |                 |              |
| ENSG0000004142                       | 3664.386652                                           |             | 3857.693872 | 3811.81012      |              |
| 3954.291745                          | 4691.531414                                           |             | 5231.043171 | 3777.963548     |              |
| 4625.62211                           | -0.292213065                                          |             | 0.036023416 | 0.171756929     |              |
| POLDIP2                              | 17                                                    | 28347177    | 28357522    | -               | 2121         |
| protein_coding                       | DNA polymerase delta interacting protein 2            |             |             |                 |              |
| [Source:HGNC Symbol;Acc:HGNC:23781]  |                                                       |             | -           | 4039            | 4359         |
|                                      | 3817                                                  | 4110        | 6064        | 93.2527973      | 97.38064378  |
| 96.18505436                          |                                                       | 99.99851141 | 119.1100792 | 132.9381229     |              |
| ENSG00000119906                      | 1578.616681                                           |             | 1195.628452 | 1312.453073     |              |
| 1266.989469                          | 744.252672                                            |             | 1023.952547 | 1362.232735     |              |
| 1011.731563                          | 0.428755264                                           |             | 0.036056376 | 0.171867754     | SLF2         |
|                                      | 10                                                    | 100912569   | 100965136   | +               | 9208         |
| protein_coding                       | SMC5-SMC6 complex localization factor 2 [Source:HGNC  |             |             |                 |              |
| Symbol;Acc:HGNC:17814]               |                                                       | -           | 1740        | 1351            | 1129         |
|                                      | 1187                                                  | 9.253640455 | 6.952107504 | 7.628435489     | 1223         |
| 7.380285969                          |                                                       | 4.352408455 | 5.993995692 |                 | 652          |
| ENSG00000054267                      | 1005.23407                                            |             | 815.9655312 | 1020.667669     |              |
| 853.6380398                          | 504.5393881                                           |             | 723.754159  | 947.28909       |              |
| 693.9771956                          | 0.447807001                                           |             | 0.036087896 | 0.171971655     | ARID4B       |
|                                      | 1                                                     | 235131634   | 235328219   | -               | 11073        |
| protein_coding                       | AT-rich interaction domain 4B [Source:HGNC            |             |             |                 |              |
| Symbol;Acc:HGNC:15550]               | ARID                                                  |             | 1108        | 922             | 878          |
|                                      | 839                                                   | 4.900079701 | 3.945409282 | 4.933283374     | 824          |
| 4.134985162                          |                                                       | 2.453603201 | 3.523121973 |                 | 442          |
| ENSG00000148396                      | 2197.36184                                            |             | 2092.128542 | 2052.960254     |              |
| 2502.899884                          | 2367.454052                                           |             | 2905.368304 | 2114.150212     |              |
| 2591.907413                          | -0.29421697                                           |             | 0.036136379 | 0.172156318     | SEC16A       |
|                                      | 9                                                     | 136440096   | 136483759   | -               | 9975         |
| protein_coding                       | "SEC16 homolog A, endoplasmic reticulum export factor |             |             |                 |              |
| [Source:HGNC Symbol;Acc:HGNC:29006]" |                                                       |             | -           | 2422            | 2364         |
|                                      | 2416                                                  | 2074        | 3368        | 11.89022076     | 11.22951523  |
| 11.01500355                          |                                                       | 13.45848173 | 12.78036355 | 15.69965817     |              |
| ENSG00000247199                      | 0                                                     | 0           | 0           | 0               | 7.990442797  |
| 14.66486377                          |                                                       | 0           | 7.551768856 | -5.395225656    | 0.036167653  |
|                                      | 1                                                     | AC091948.1  | 5           | 148268307       | 148383783    |
|                                      | -                                                     | 3201        | antisense   | uncharacterized | LOC102546294 |
| [Source:NCBI gene;Acc:102546294]     |                                                       |             | -           | 0               | 0            |
|                                      | 0                                                     | 7           | 17          | 0               | 0            |
| 0.134418711                          |                                                       | 0.246941604 |             |                 |              |
| ENSG00000273356                      | 18.14501932                                           |             | 31.85982551 | 32.5497662      |              |
| 51.79842475                          | 79.90442797                                           |             | 56.93417699 | 27.51820368     |              |
| 62.8790099                           | -1.193707558                                          |             | 0.036170653 | 0.172273204     |              |
| LINC02019                            | 3                                                     | 50669989    | 50672048    | +               | 2060         |
| lincRNA                              | long intergenic non-protein coding RNA 2019           |             |             |                 |              |
| [Source:HGNC Symbol;Acc:HGNC:52854]  |                                                       |             | -           | 20              | 36           |
|                                      | 50                                                    | 70          | 66          | 0.475435338     | 0.828059838  |
| 0.845663639                          |                                                       | 1.348698354 | 2.088710163 | 1.489730582     |              |
| ENSG00000100578                      | 887.2914447                                           |             | 490.2873148 | 781.1943887     |              |

|                                                      |                                                    |             |             |             |
|------------------------------------------------------|----------------------------------------------------|-------------|-------------|-------------|
| 668.1996792                                          | 436.0498784                                        | 351.9567305 | 719.5910494 |             |
| 485.402096                                           | 0.568320495                                        | 0.036199628 | 0.172314959 |             |
| KIAA0586                                             | 14                                                 | 58427385    | 58551289    | + 10184     |
| protein_coding                                       | KIAA0586 [Source:HGNC Symbol;Acc:HGNC:19960]       |             |             |             |
| -                                                    | 978                                                | 554         | 672         | 645 382 408 |
| 4.702720282                                          | 2.577613602                                        | 4.105421279 | 3.519276323 |             |
| 2.30564443                                           | 1.862828143                                        |             |             |             |
| ENSG00000184220                                      | 1545.048395                                        | 1536.351586 | 1671.662993 |             |
| 1477.291074                                          | 1066.153368                                        | 1192.167161 | 1584.354324 |             |
| 1245.203867                                          | 0.347137638                                        | 0.036202944 | 0.172314959 | CMSS1       |
| 3                                                    | 99817834                                           | 100181732   | + 7210      |             |
| protein_coding                                       | cms1 ribosomal small subunit homolog (yeast)       |             |             |             |
| [Source:HGNC Symbol;Acc:HGNC:28666]                  | -                                                  |             | 1703        | 1736 1438   |
| 1426                                                 | 934                                                | 1382        | 11.56666258 | 11.40882443 |
| 12.40881952                                          | 10.98996488                                        | 7.962674661 | 8.912587292 |             |
| ENSG00000118620                                      | 233.1634983                                        | 284.0834442 | 238.3107882 |             |
| 183.3664236                                          | 155.2428886                                        | 169.0772529 | 251.8525769 |             |
| 169.228855                                           | 0.573763388                                        | 0.036208644 | 0.172314959 | ZNF430      |
| 19                                                   | 21020620                                           | 21060050    | + 6845      |             |
| protein_coding                                       | zinc finger protein 430 [Source:HGNC               |             |             |             |
| Symbol;Acc:HGNC:20808]                               | zf-C2H2                                            | 257         | 321         | 205 177 136 |
| 196                                                  | 1.838604651                                        | 2.222071457 | 1.863319183 |             |
| 1.436851407                                          | 1.22127317                                         | 1.331415587 |             |             |
| ENSG00000188747                                      | 27.21752898                                        | 19.46989337 | 24.41232465 |             |
| 6.215810969                                          | 6.848950969                                        | 5.175834272 | 23.69991567 |             |
| 6.080198737                                          | 1.966761452                                        | 0.036225854 | 0.172342366 | NOXA1       |
| 9                                                    | 137423350                                          | 137434406   | + 1678      |             |
| protein_coding                                       | NADPH oxidase activator 1 [Source:HGNC             |             |             |             |
| Symbol;Acc:HGNC:10668]                               | -                                                  | 30          | 22          | 21 6 6      |
| 6                                                    | 0.875503692                                        | 0.621236787 | 0.778635472 |             |
| 0.198687862                                          | 0.219789355                                        | 0.166260971 |             |             |
| ENSG00000231528                                      | 98.89035529                                        | 104.4294281 | 90.67434869 |             |
| 70.44585765                                          | 46.80116496                                        | 33.64292277 | 97.99804402 |             |
| 50.29664846                                          | 0.96605972                                         | 0.036248988 | 0.172342366 |             |
| FAM225A                                              | 9                                                  | 113113073   | 113119928   | + 6100      |
| lincRNA family with sequence similarity 225 member A | [Source:HGNC                                       |             |             |             |
| Symbol;Acc:HGNC:27855]                               | -                                                  | 109         | 118         | 78 68 41    |
| 39                                                   | 0.875034843                                        | 0.916597383 | 0.795557573 |             |
| 0.619428411                                          | 0.413143935                                        | 0.297280067 |             |             |
| ENSG00000160305                                      | 865.5174215                                        | 687.641234  | 940.4557448 |             |
| 804.9475205                                          | 523.9447491                                        | 436.4953569 | 831.2048001 |             |
| 588.4625422                                          | 0.498387222                                        | 0.036251007 | 0.172342366 | DIP2A       |
| 21                                                   | 46458899                                           | 46569852    | + 13557     |             |
| protein_coding                                       | disco interacting protein 2 homolog A [Source:HGNC |             |             |             |
| Symbol;Acc:HGNC:17217]                               | -                                                  | 954         | 777         | 809 777 459 |
| 506                                                  | 3.445985631                                        | 2.715712952 | 3.712716364 |             |
| 3.184706882                                          | 2.081116774                                        | 1.73547331  |             |             |
| ENSG00000184486                                      | 125.2006333                                        | 37.16979643 | 72.07448229 |             |
| 38.33083431                                          | 27.39580388                                        | 36.2308399  | 78.14830401 |             |
| 33.98582603                                          | 1.199666819                                        | 0.036253375 | 0.172342366 | POU3F2      |

|                        |                                                     |             |              |             |            |                         |
|------------------------|-----------------------------------------------------|-------------|--------------|-------------|------------|-------------------------|
| 6                      | 98834592                                            | 98839470    | +            | 4879        |            |                         |
| protein_coding         | POU class 3 homeobox 2 [Source:HGNC                 |             |              |             |            |                         |
| Symbol;Acc:HGNC:9215]  | Pou                                                 | 138         | 42           | 62          | 37         | 24                      |
| 42                     | 1.385086677                                         | 0.407891742 |              | 0.790619857 |            |                         |
| 0.421388762            | 0.3023624                                           | 0.400266727 |              |             |            |                         |
| ENSG00000225849        | 0                                                   | 0           | 17.61146441  | 0           |            |                         |
| 5.175834272            | 0                                                   | 7.595766228 | -5.401810087 | 0.036303973 |            |                         |
| 1                      | MKRN7P                                              | 20          | 46463719     | 46477232    |            | -                       |
| 1994                   | transcribed_processed_pseudogene                    |             |              |             |            | "makorin ring           |
| finger protein 7,      | pseudogene [Source:HGNC                             |             |              |             |            | Symbol;Acc:HGNC:7119]"  |
| -                      | 0                                                   | 0           | 0            | 17          | 0          | 6                       |
| 0                      | 0                                                   | 0.47373537  | 0            | 0.139912693 |            | 0                       |
| ENSG00000143643        | 825.598379                                          | 840.7453955 | 773.0569472  |             |            |                         |
| 752.1131273            | 586.7267997                                         | 474.4514749 | 813.1335739  |             |            |                         |
| 604.4304673            | 0.429075842                                         | 0.036402161 | 0.173003175  |             |            | TTC13                   |
| 1                      | 230906243                                           | 230978875   | -            | 4212        |            |                         |
| protein_coding         | tetratricopeptide repeat domain 13 [Source:HGNC     |             |              |             |            |                         |
| Symbol;Acc:HGNC:26204] | -                                                   | 910         | 950          | 665         | 726        | 514                     |
| 550                    | 10.57990367                                         | 10.68714455 | 9.822909196  |             |            |                         |
| 9.577679539            | 7.501050973                                         | 6.071630656 |              |             |            |                         |
| ENSG00000223749        | 45.3625483                                          | 89.38451047 | 34.8747495   |             |            |                         |
| 21.75533839            | 13.69790194                                         | 30.19236658 | 56.54060275  |             |            |                         |
| 21.88186897            | 1.365576831                                         | 0.036534646 | 0.173549494  |             |            |                         |
| MIR503HG               | X                                                   | 134543337   | 134546632    | -           |            | 1678                    |
| lincRNA                | MIR503 host gene [Source:HGNC                       |             |              |             |            | Symbol;Acc:HGNC:28258]" |
| -                      | 50                                                  | 101         | 30           | 21          | 12         | 35                      |
| 1.45917282             | 2.852041615                                         | 1.112336389 | 0.695407519  |             |            |                         |
| 0.43957871             | 0.969855663                                         |             |              |             |            |                         |
| ENSG00000125676        | 3127.29408                                          | 2405.416826 | 2365.670508  |             |            |                         |
| 2622.036261            | 1705.388791                                         | 1643.327381 | 2632.793804  |             |            |                         |
| 1990.250811            | 0.403943374                                         | 0.036546895 | 0.173549494  |             |            | THOC2                   |
| X                      | 123600561                                           | 123733056   | -            | 10277       |            |                         |
| protein_coding         | THO complex 2 [Source:HGNC                          |             |              |             |            | Symbol;Acc:HGNC:19073]" |
| -                      | 3447                                                | 2718        | 2035         | 2531        | 1494       | 1905                    |
| 16.42493314            | 12.53168693                                         | 12.31983535 | 13.68478039  |             |            |                         |
| 8.935762167            | 8.619054793                                         |             |              |             |            |                         |
| ENSG00000166189        | 631.4466723                                         | 899.1550756 | 776.5444221  |             |            |                         |
| 764.5447492            | 1126.652434                                         | 1266.354118 | 769.0487233  |             |            |                         |
| 1052.517101            | -0.453051703                                        | 0.036552792 | 0.173549494  |             |            | HPS6                    |
| 10                     | 102065390                                           | 102068038   | +            | 2649        |            |                         |
| protein_coding         | "HPS6, biogenesis of lysosomal organelles complex 2 |             |              |             |            |                         |
| subunit 3 [Source:HGNC | Symbol;Acc:HGNC:18817]"                             |             |              |             | 696        | 1016                    |
| 668                    | 738                                                 | 987         | 1468         | 12.86636788 | 18.1734839 |                         |
| 15.68921992            | 15.48055217                                         | 22.90248222 | 25.76766795  |             |            |                         |
| ENSG00000204267        | 1144.043468                                         | 1107.128937 | 902.0935203  |             |            |                         |
| 863.9977247            | 760.2335576                                         | 833.3093177 | 1051.088642  |             |            |                         |
| 819.1802               | 0.360145336                                         | 0.036556358 | 0.173549494  |             |            | TAP2                    |
| 6                      | 32821833                                            | 32838780    | -            | 6390        |            |                         |
| protein_coding         | "transporter 2, ATP binding cassette subfamily B    |             |              |             |            |                         |
| member [Source:HGNC    | Symbol;Acc:HGNC:44]"                                |             |              |             | -          | 1261                    |
|                        |                                                     |             |              |             |            | 1251                    |

|                                                   |                                                   |             |             |             |                        |                |        |
|---------------------------------------------------|---------------------------------------------------|-------------|-------------|-------------|------------------------|----------------|--------|
|                                                   | 776                                               | 834         | 666         | 966         | 9.663688267            | 9.27647316     |        |
|                                                   | 7.555578284                                       |             | 7.252324635 |             | 6.406498536            | 7.029222433    |        |
| ENSG00000157429                                   | 41.73354444                                       |             | 30.97483036 |             | 48.8246493             |                |        |
| 59.05020421                                       | 91.31934625                                       |             | 97.47821212 |             | 40.51100803            |                |        |
| 82.61592086                                       | -1.032543266                                      |             | 0.036598588 |             | 0.173703362            |                | ZNF19  |
|                                                   | 16                                                | 71464555    | 71565089    |             | -                      | 9225           |        |
| protein_coding                                    | zinc finger protein 19 [Source:HGNC               |             |             |             |                        |                |        |
| Symbol;Acc:HGNC:12981]                            | zf-C2H2                                           | 46          | 35          |             | 42                     | 57             | 80     |
|                                                   | 113                                               | 0.244185651 | 0.179774509 |             | 0.283262942            |                |        |
| 0.343336934                                       | 0.533053712                                       |             | 0.569564728 |             |                        |                |        |
| ENSG00000189398                                   | 0.907250966                                       |             | 4.424975766 |             | 0                      | 11.39565344    |        |
|                                                   | 22.82983656                                       | 10.35166854 | 1.777408911 |             | 14.85905285            |                |        |
|                                                   | -3.018649878                                      | 0.036613574 | 0.173727871 |             | OR7E12P                | 11             |        |
|                                                   | 3390780                                           | 3391752     | -           | 973         | unprocessed_pseudogene |                |        |
| olfactory receptor family 7 subfamily E member 12 | pseudogene                                        |             |             |             |                        |                |        |
| [Source:HGNC                                      | Symbol;Acc:HGNC:8383]                             |             |             |             |                        |                |        |
|                                                   | 11                                                | 20          | 12          | 0.050328715 | 0.243491388            |                | 0      |
|                                                   | 0.628191258                                       | 1.263468781 | 0.573455106 |             |                        |                |        |
| ENSG00000221963                                   | 581.5478692                                       |             | 563.7419125 |             | 521.9587508            |                |        |
| 448.5743583                                       | 441.7573375                                       |             | 347.6435352 |             | 555.7495108            |                |        |
| 412.6584103                                       | 0.431249083                                       |             | 0.036635617 |             | 0.173785848            |                | APOL6  |
|                                                   | 22                                                | 35648395    | 35668409    |             | +                      | 10121          |        |
| protein_coding                                    | apolipoprotein L6 [Source:HGNC                    |             |             |             |                        |                |        |
| Symbol;Acc:HGNC:14870]                            | -                                                 | 641         | 637         | 449         | 433                    | 387            | 403    |
| 3.101439317                                       | 2.98223902                                        |             | 2.760131432 |             | 2.377259081            |                |        |
| 2.350362776                                       | 1.851452777                                       |             |             |             |                        |                |        |
| ENSG00000198824                                   | 1644.846001                                       |             | 1269.968045 |             | 1374.06513             |                |        |
| 1880.282818                                       | 1677.992987                                       |             | 1817.580468 |             | 1429.626392            |                |        |
| 1791.952091                                       | -0.325893791                                      |             | 0.036664068 |             | 0.173874182            |                | CHAMP1 |
|                                                   | 13                                                | 114314335   | 114337626   |             | +                      | 5770           |        |
| protein_coding                                    | chromosome alignment maintaining phosphoprotein 1 |             |             |             |                        |                |        |
| [Source:HGNC                                      | Symbol;Acc:HGNC:20311]                            |             |             |             |                        |                |        |
|                                                   | 1815                                              | 1470        | 2107        | 15.38688382 | 11.78426577            |                |        |
| 12.74525444                                       | 17.47885018                                       |             | 15.6598963  |             | 16.97929839            |                |        |
| ENSG00000163251                                   | 194.1517067                                       |             | 151.3341712 |             | 185.998664             |                |        |
| 128.4600934                                       | 118.7151501                                       |             | 71.59904076 |             | 177.161514             |                |        |
| 106.2580948                                       | 0.740412987                                       |             | 0.036682863 |             | 0.173910588            |                | FZD5   |
|                                                   | 2                                                 | 207762586   | 207769563   |             | -                      | 6708           |        |
| protein_coding                                    | frizzled class receptor 5 [Source:HGNC            |             |             |             |                        |                |        |
| Symbol;Acc:HGNC:4043]                             | -                                                 |             | 214         | 171         | 160                    | 124            | 104    |
|                                                   | 83                                                | 1.562245934 | 1.207895873 |             | 1.483999571            |                |        |
| 1.027166093                                       | 0.952988469                                       |             | 0.575328723 |             |                        |                |        |
| ENSG00000164916                                   | 2161.071801                                       |             | 2393.026894 |             | 2255.233801            |                |        |
| 2638.611757                                       | 2511.282022                                       |             | 3303.044904 |             | 2269.777499            |                |        |
| 2817.646228                                       | -0.312341616                                      |             | 0.036691408 |             | 0.173910588            |                | FOXK1  |
|                                                   | 7                                                 | 4682309     | 4771443     | +           | 13093                  | protein_coding |        |
| forkhead box K1                                   | [Source:HGNC                                      |             |             |             |                        |                |        |
| Symbol;Acc:HGNC:23480]                            | Fork                                              |             |             |             |                        |                | 2382   |
|                                                   | 2704                                              | 1940        | 2547        | 2200        | 3829                   | 8.909047467    |        |
| 9.785746479                                       | 9.218694195                                       |             | 10.80940579 |             | 10.32834825            |                |        |
| 13.59806825                                       |                                                   |             |             |             |                        |                |        |

|                                                     |                                                     |                                 |                                |                |        |
|-----------------------------------------------------|-----------------------------------------------------|---------------------------------|--------------------------------|----------------|--------|
| ENSG00000181029                                     | 42.6407954                                          | 53.98470434                     | 22.08734135                    |                |        |
| 40.4027713                                          | 90.17785443                                         | 142.3354425                     | 39.57094703                    |                |        |
| 90.97202273                                         | -1.197317486                                        | 0.036703957                     | 0.173915904                    |                |        |
| TRAPPC5 19                                          | 7680843                                             | 7687703 +                       | 5669                           | protein_coding |        |
| trafficking protein particle complex 5 [Source:HGNC |                                                     |                                 |                                |                |        |
| Symbol;Acc:HGNC:23067]                              | -                                                   | 47                              | 61                             | 19             | 39 79  |
| 165                                                 | 0.405994439                                         | 0.509858682                     | 0.208523013                    |                |        |
| 0.38226998                                          | 0.856580127                                         | 1.353344946                     |                                |                |        |
| ENSG00000259172                                     | 3.629003864                                         | 2.654985459                     | 0                              | 5.179842475    |        |
| 0                                                   | 58.65945508                                         | 2.094663108                     |                                |                |        |
| 21.27976585                                         | -3.322317563                                        | 0.036712193                     | 0.173915904                    |                |        |
| AC023024.1                                          | 15                                                  | 101295419                       | 101305737                      | +              | 2590   |
| antisense                                           |                                                     | "novel transcript, antisense to |                                |                |        |
| PCSK6"                                              | -                                                   | 4                               | 3                              | 0              | 5 0 68 |
| 0.075629096                                         | 0.054884275                                         | 0                               | 0.107270989                    | 0              |        |
| 1.220787761                                         |                                                     |                                 |                                |                |        |
| ENSG00000173198                                     | 6.350756762                                         | 4.424975766                     | 8.137441549                    | 0              |        |
| 0                                                   | 0                                                   | 6.304391359                     | 0                              | 5.087604919    |        |
| 0.036777809                                         | 1                                                   | CYSLTR1 X                       | 78271464                       | 78327691       |        |
| -                                                   | 5571                                                | protein_coding                  | cysteinyl leukotriene receptor |                |        |
| 1 [Source:HGNC                                      | Symbol;Acc:HGNC:17451]                              | -                               | 7                              | 5              | 7      |
| 0                                                   | 0                                                   | 0                               | 0.061530942                    | 0.042526857    |        |
| 0.078175691                                         | 0                                                   | 0                               | 0                              |                |        |
| ENSG00000257126                                     | 51.71330506                                         | 52.21471403                     | 41.8496994                     |                |        |
| 33.15099184                                         | 10.27342645                                         | 6.038473317                     | 48.59257283                    |                |        |
| 16.48763054                                         | 1.565323016                                         | 0.036782689                     | 0.174177201                    | FOXG1-         |        |
| AS1 14                                              | 28729083                                            | 28765277                        | -                              | 874            |        |
| antisense                                           | FOXG1 antisense                                     | RNA 1 [Source:HGNC              |                                |                |        |
| Symbol;Acc:HGNC:50663]                              | -                                                   | 57                              | 59                             | 36             | 32 9   |
| 7                                                   | 3.193685206                                         | 3.198652196                     | 2.562700861                    |                |        |
| 2.034466717                                         | 0.632963165                                         | 0.37240682                      |                                |                |        |
| ENSG00000121753                                     | 146.9746565                                         | 138.0592439                     | 180.1862057                    |                |        |
| 127.4241249                                         | 52.5086241                                          | 79.36279217                     | 155.0733687                    |                |        |
| 86.43184704                                         | 0.840900992                                         | 0.036787044                     | 0.174177201                    | ADGRB2         |        |
| 1                                                   | 31727117                                            | 31764893                        | -                              | 7756           |        |
| protein_coding                                      | adhesion G protein-coupled receptor B2 [Source:HGNC |                                 |                                |                |        |
| Symbol;Acc:HGNC:944]                                | -                                                   | 162                             | 156                            | 155            | 123 46 |
| 92                                                  | 1.022835747                                         | 0.95304463                      | 1.24337103                     |                |        |
| 0.881209874                                         | 0.364558637                                         | 0.551545118                     |                                |                |        |
| ENSG00000063046                                     | 7238.048207                                         | 6856.057451                     | 7808.456412                    |                |        |
| 9431.457178                                         | 8062.356782                                         | 8719.55547                      | 7300.854023                    |                |        |
| 8737.78981                                          | -0.259354752                                        | 0.036813185                     | 0.174254327                    | EIF4B          |        |
| 12                                                  | 53006158                                            | 53042209                        | +                              | 6146           |        |
| protein_coding                                      | eukaryotic translation initiation factor 4B         |                                 |                                |                |        |
| [Source:HGNC                                        | Symbol;Acc:HGNC:3285]                               | -                               | 7978                           | 7747           | 6717   |
| 9104                                                | 7063                                                | 10108                           | 63.56677224                    | 59.7265516     |        |
| 67.99698227                                         | 82.30983608                                         | 70.63891347                     | 76.47221955                    |                |        |
| ENSG00000108423                                     | 192.3372048                                         | 156.6441421                     | 226.6858717                    |                |        |
| 106.704755                                          | 86.75337894                                         | 153.5497501                     | 191.8890729                    |                |        |
| 115.6692947                                         | 0.724891277                                         | 0.036838499                     | 0.174311214                    | TUBD1          |        |



|                              |                                               |                        |                        |                    |                |
|------------------------------|-----------------------------------------------|------------------------|------------------------|--------------------|----------------|
| 17                           | 59859482                                      | 59892945               | -                      | 3330               |                |
| protein_coding               | tubulin delta 1                               | [Source:HGNC           | Symbol;Acc:HGNC:16811] |                    |                |
| -                            | 212                                           | 177                    | 195                    | 103                | 76 178         |
| 3.117599413                  | 2.518578396                                   | 3.643319216            | 1.718719621            |                    |                |
| 1.40286771                   | 2.48546005                                    |                        |                        |                    |                |
| ENSG00000253227              | 9.07250966                                    | 1.769990306            | 0                      | 24.86324388        |                |
|                              | 23.97132839                                   | 15.52750281            | 3.614166655            | 21.45402503        |                |
|                              | -2.542001823                                  | 0.036844911            | 0.174311214            | AC090192.2         |                |
| 8                            | 124271683                                     | 124277584              | +                      | 553                |                |
| lincRNA novel transcript     |                                               | -                      | 10                     | 2                  | 0 24           |
| 21                           | 18                                            | 0.885530558            | 0.171368622            | 0                  |                |
| 2.411560457                  | 2.334218591                                   | 1.513485944            |                        |                    |                |
| ENSG00000122641              | 552.5158383                                   | 404.442785             | 1053.217435            |                    |                |
| 295.251021                   | 560.4724876                                   | 415.7920198            | 670.058686             |                    |                |
| 423.8385095                  | 0.659802216                                   | 0.036875539            | 0.174409465            | INHBA              |                |
| 7                            | 41667168                                      | 41705834               | -                      | 8302               |                |
| protein_coding               | inhibin subunit beta A                        | [Source:HGNC           |                        |                    |                |
| Symbol;Acc:HGNC:6066]        | -                                             | 609                    | 457                    | 906                | 285 491        |
| 482                          | 3.592222652                                   | 2.608314237            | 6.789727041            |                    |                |
| 1.907542288                  | 3.635349109                                   | 2.699574563            |                        |                    |                |
| ENSG00000216906              | 14.51601546                                   | 1.769990306            | 3.48747495             | 0                  |                |
| 0                            | 0                                             | 6.591160237            | 0                      | 5.155775045        |                |
| 0.036968834                  | 1                                             | AL355312.1             | 6                      | 149904243          |                |
| 149906418                    | +                                             | 2176                   | processed_pseudogene   | multimerin 2       |                |
| (MMRN2) pseudogene           | -                                             | 16                     | 2                      | 3                  | 0 0            |
| 0                            | 0.360072352                                   | 0.043550941            | 0.085776676            | 0                  |                |
| 0                            | 0                                             |                        |                        |                    |                |
| ENSG00000128185              | 1196.664024                                   | 1353.157589            | 1075.304776            |                    |                |
| 1189.291832                  | 1776.161285                                   | 1795.151853            | 1208.375463            |                    |                |
| 1586.868323                  | -0.392759808                                  | 0.036970806            | 0.174813307            | DGCR6L             |                |
| 22                           | 20314276                                      | 20320080               | -                      | 1154               |                |
| protein_coding               | DiGeorge syndrome critical region gene 6 like | [Source:HGNC           | Symbol;Acc:HGNC:18551] |                    |                |
|                              |                                               | -                      | 1319                   | 1529               | 925            |
| 1148                         | 1556                                          | 2081                   | 55.97159336            | 62.78098387        |                |
| 49.87039069                  | 55.27746559                                   | 82.88026749            | 83.84888455            |                    |                |
| ENSG00000273733              | 2.721752898                                   | 7.079961225            | 9.299933199            | 0                  |                |
| 0                            | 0                                             | 6.367215774            | 0                      | 5.101186698        |                |
| 0.037044073                  | 1                                             | AC011472.4             | 19                     | 11221083           |                |
| 11221573                     | +                                             | 491                    | antisense              | "novel transcript, |                |
| antisense to DOCK6"          | -                                             | 3                      | 8                      | 8                  | 0 0            |
| 0                            | 0.299204724                                   | 0.772031349            | 1.01371376             | 0                  |                |
| 0                            | 0                                             |                        |                        |                    |                |
| ENSG00000178605              | 1788.191654                                   | 2253.19766             | 2044.822812            |                    |                |
| 2071.93699                   | 2676.798337                                   | 3014.923463            | 2028.737375            |                    |                |
| 2587.886263                  | -0.351414915                                  | 0.037055849            | 0.175088595            | GTPBP6             |                |
| X                            | 304529                                        | 318819                 | -                      | 2964               | protein_coding |
| binding protein 6 (putative) | [Source:HGNC                                  | Symbol;Acc:HGNC:30189] |                        |                    | GTP            |
| -                            | 1971                                          | 2546                   | 1759                   | 2000               | 2345 3495      |
| 32.5639522                   | 40.7011463                                    | 36.922788              | 37.49417827            |                    |                |
| 48.63086651                  | 54.82769635                                   |                        |                        |                    |                |

|                                     |                                                   |             |             |                    |      |
|-------------------------------------|---------------------------------------------------|-------------|-------------|--------------------|------|
| ENSG00000149929                     | 348.3843709                                       | 640.7364909 | 654.4827989 |                    |      |
| 416.459335                          | 289.9389244                                       | 404.5777122 | 547.8678869 |                    |      |
| 370.3253238                         | 0.563314248                                       | 0.037057746 | 0.175088595 | HIRIP3             |      |
| 16                                  | 29992321                                          | 29996436    | -           | 3931               |      |
| protein_coding                      | HIRA interacting protein 3 [Source:HGNC           |             |             |                    |      |
| Symbol;Acc:HGNC:4917]               | -                                                 | 384         | 724         | 563                | 402  |
| 469                                 | 4.783622105                                       | 8.72693946  | 8.9107077   |                    | 254  |
| 5.68244254                          | 3.971714597                                       | 5.547544786 |             |                    |      |
| ENSG00000177576                     | 79.83808501                                       | 96.46447169 | 105.7867401 |                    |      |
| 164.7189907                         | 127.8470848                                       | 174.2530871 | 94.02976561 |                    |      |
| 155.6063875                         | -0.729883197                                      | 0.03705872  | 0.175088595 |                    |      |
| C18orf32                            | 18                                                | 49477250    | 49487252    | -                  | 5740 |
| protein_coding                      | chromosome 18 open reading frame 32               |             |             |                    |      |
| [Source:HGNC Symbol;Acc:HGNC:31690] | -                                                 |             | 88          | 109                | 91   |
| 159                                 | 112                                               | 202         | 0.750757126 | 0.89978976         |      |
| 0.986362032                         | 1.539207871                                       | 1.199370853 | 1.636328502 |                    |      |
| ENSG00000127920                     | 598.7856375                                       | 598.2567235 | 578.9208416 |                    |      |
| 419.5672404                         | 1068.436351                                       | 1209.419941 | 591.9877342 |                    |      |
| 899.1411777                         | -0.603259503                                      | 0.037083091 | 0.175156957 | GNG11              |      |
| 7                                   | 93921699                                          | 93928610    | +           | 3055               |      |
| protein_coding                      | G protein subunit gamma 11 [Source:HGNC           |             |             |                    |      |
| Symbol;Acc:HGNC:4403]               | -                                                 | 660         | 676         | 498                | 405  |
| 1402                                | 10.57940893                                       | 10.48484277 | 10.14203196 |                    | 936  |
| 7.366409408                         | 18.83267425                                       | 21.33869309 |             |                    |      |
| ENSG00000260793                     | 5.443505796                                       | 11.50493699 | 2.3249833   |                    | 0    |
| 0                                   | 0                                                 | 6.424475362 | 0           | 5.120574627        |      |
| 0.037108769                         | 1                                                 | AC003102.1  | 17          | 44221401           |      |
| 44223710                            | +                                                 | 2012        | antisense   | "novel transcript, |      |
| antisense to UBTF"                  | -                                                 | 6           | 13          | 2                  | 0    |
| 0                                   | 0.14603332                                        | 0.306155324 | 0.061845608 | 0                  |      |
| 0                                   | 0                                                 |             |             |                    |      |
| ENSG00000108433                     | 1046.060364                                       | 1208.018384 | 993.9303607 |                    |      |
| 1311.536115                         | 1392.62003                                        | 1363.832331 | 1082.669703 |                    |      |
| 1355.996158                         | -0.324129087                                      | 0.037114009 | 0.175256194 | GOSR2              |      |
| 17                                  | 46923075                                          | 46975524    | +           | 14366              |      |
| protein_coding                      | golgi SNAP receptor complex member 2 [Source:HGNC |             |             |                    |      |
| Symbol;Acc:HGNC:4431]               | -                                                 | 1153        | 1365        | 855                | 1266 |
| 1581                                | 3.930267669                                       | 4.502183895 | 3.702858354 |                    | 1220 |
| 4.896772046                         | 5.220009925                                       | 5.117136783 |             |                    |      |
| ENSG00000100347                     | 1009.770325                                       | 1215.98334  | 1071.817301 |                    |      |
| 1174.788273                         | 1496.495787                                       | 1544.123891 | 1099.190322 |                    |      |
| 1405.135984                         | -0.354257978                                      | 0.037152707 | 0.175392111 | SAMM50             |      |
| 22                                  | 43955421                                          | 44010531    | +           | 6435               |      |
| protein_coding                      | SAMM50 sorting and assembly machinery component   |             |             |                    |      |
| [Source:HGNC Symbol;Acc:HGNC:24276] | -                                                 |             | 1113        | 1374               | 922  |
| 1134                                | 1311                                              | 1790        | 8.469841761 | 10.11729987        |      |
| 8.914340452                         | 9.792115941                                       | 12.52280162 | 12.93407866 |                    |      |
| ENSG00000249471                     | 277.6187956                                       | 469.0474312 | 331.3101202 |                    |      |
| 500.372783                          | 461.1626986                                       | 573.6549651 | 359.325449  |                    |      |
| 511.7301489                         | -0.509964404                                      | 0.037165942 | 0.175407776 |                    |      |

|                                   |                                                 |                       |                               |             |       |
|-----------------------------------|-------------------------------------------------|-----------------------|-------------------------------|-------------|-------|
| ZNF324B 19                        | 58451604                                        | 58457833              | +                             | 4042        |       |
| protein_coding                    | zinc finger protein 324B [Source:HGNC           |                       |                               |             |       |
| Symbol;Acc:HGNC:33107]            | zf-C2H2 306                                     | 530                   | 285                           | 483         | 404   |
| 665                               | 3.707266449                                     | 6.213066489           | 4.386876391                   |             |       |
| 6.63992028                        | 6.143734169                                     | 7.649910502           |                               |             |       |
| ENSG00000152208                   | 10.88701159                                     | 0.884995153           | 8.137441549                   | 0           |       |
| 0                                 | 0                                               | 6.636482765           | 0                             | 5.161903034 |       |
| 0.037204794                       | 1                                               | GRID2 4               | 92303622                      | 93810157    |       |
| +                                 | 10951                                           | protein_coding        | glutamate ionotropic receptor |             |       |
| delta type subunit 2 [Source:HGNC | Symbol;Acc:HGNC:4576]                           | -                     |                               | 12          |       |
| 1                                 | 7                                               | 0                     | 0                             | 0.053660677 |       |
| 0.004326858                       | 0.039769589                                     | 0                     | 0                             | 0           |       |
| ENSG00000164733                   | 41398.76883                                     | 53403.26252           | 52293.52438                   |             |       |
| 64204.14747                       | 56251.5758                                      | 57754.54672           | 49031.85191                   |             |       |
| 59403.42333                       | -0.276839007                                    | 0.037214892           | 0.175591949                   | CTSB        |       |
| 8                                 | 11842524                                        | 11869448              | -                             | 7428        |       |
| protein_coding                    | cathepsin B [Source:HGNC                        | Symbol;Acc:HGNC:2527] | -                             |             |       |
| 45631                             | 60343                                           | 44984                 | 61975                         | 49279       | 66951 |
| 384.9297197                       | 376.7844943                                     | 463.6141515           | 407.7907322                   |             |       |
| 419.0985818                       |                                                 |                       |                               |             |       |
| ENSG00000090924                   | 786.5865875                                     | 654.8964133           | 714.9323647                   |             |       |
| 516.948279                        | 494.2659616                                     | 621.9627516           | 718.8051218                   |             |       |
| 544.3923307                       | 0.399800899                                     | 0.037266567           | 0.175788879                   |             |       |
| PLEKHG2 19                        | 39412585                                        | 39428415              | +                             | 9200        |       |
| protein_coding                    | pleckstrin homology and RhoGEF                  | domain containing G2  |                               |             |       |
| [Source:HGNC                      | Symbol;Acc:HGNC:29515]                          | -                     | 867                           | 740         | 615   |
| 499                               | 433                                             | 721                   | 4.614875123                   | 3.811275413 |       |
| 4.159049938                       | 3.01387171                                      | 2.892993309           | 3.644000732                   |             |       |
| ENSG00000188706                   | 1081.443151                                     | 996.5045424           | 1169.4666                     |             |       |
| 1216.227013                       | 1703.105808                                     | 1273.255231           | 1082.471431                   |             |       |
| 1397.52935                        | -0.368396481                                    | 0.037301837           | 0.175883471                   | ZDHHC9      |       |
| X                                 | 129803288                                       | 129843909             | -                             | 5243        |       |
| protein_coding                    | zinc finger DHHC-type containing 9 [Source:HGNC |                       |                               |             |       |
| Symbol;Acc:HGNC:18475]            | -                                               | 1192                  | 1126                          | 1006        | 1174  |
| 1476                              | 11.13332998                                     | 10.17618453           | 11.93781844                   |             |       |
| 12.44228895                       | 17.49187341                                     | 13.08993584           |                               |             |       |
| ENSG00000160326                   | 236.7925021                                     | 221.2487883           | 383.6222445                   |             |       |
| 237.2367853                       | 116.4321665                                     | 161.3135015           | 280.5545116                   |             |       |
| 171.6608178                       | 0.705886975                                     | 0.037306506           | 0.175883471                   | SLC2A6      |       |
| 9                                 | 133471095                                       | 133479137             | -                             | 3540        |       |
| protein_coding                    | solute carrier family 2 member 6 [Source:HGNC   |                       |                               |             |       |
| Symbol;Acc:HGNC:11011]            | -                                               | 261                   | 250                           | 330         | 229   |
| 187                               | 3.610488191                                     | 3.34628701            | 5.799860187                   |             | 102   |
| 3.594547806                       | 1.77110484                                      | 2.456231873           |                               |             |       |
| ENSG00000221843                   | 69.85832438                                     | 14.15992245           | 31.38727455                   |             |       |
| 125.3521879                       | 65.06503421                                     | 81.9507093            | 38.46850713                   |             |       |
| 90.78931046                       | -1.237582369                                    | 0.037325516           | 0.175926207                   |             |       |
| C2orf16 2                         | 27537386                                        | 27582721              | +                             | 16402       |       |
| protein_coding                    | chromosome 2 open reading frame 16 [Source:HGNC |                       |                               |             |       |
| Symbol;Acc:HGNC:25275]            | -                                               | 77                    | 16                            | 27          | 121   |
|                                   |                                                 |                       |                               |             | 57    |

|                                      |                                                    |             |             |                |             |
|--------------------------------------|----------------------------------------------------|-------------|-------------|----------------|-------------|
| 95                                   | 0.229891334                                        | 0.046222094 | 0.102417413 |                |             |
| 0.409921414                          | 0.213611883                                        | 0.269313309 |             |                |             |
| ENSG00000139112                      | 146.0674055                                        | 141.5992245 | 134.8490314 |                |             |
| 145.0355893                          | 251.1282022                                        | 282.9456069 | 140.8385538 |                |             |
| 226.3697994                          | -0.685061292                                       | 0.037344358 | 0.175941371 |                |             |
| GABARAPL1                            | 12                                                 | 10212458    | 10223130    | +              | 4086        |
| protein_coding                       | GABA type A receptor associated protein like 1     |             |             |                |             |
| [Source:HGNC Symbol;Acc:HGNC:4068]   | -                                                  | 161         | 160         | 116            |             |
| 140                                  | 220                                                | 328         | 1.929550713 | 1.855444897    |             |
| 1.766308153                          | 1.903889405                                        | 3.309570819 | 3.732557438 |                |             |
| ENSG00000163508                      | 14.51601546                                        | 0           | 2.3249833   | 21.75533839    |             |
| 13.69790194                          | 55.2088989                                         | 5.613666252 | 30.22071308 |                |             |
| -2.421990567                         | 0.037365673                                        | 0.175941371 | EOMES       | 3              |             |
| 27715949                             | 27722711                                           | -           | 3656        | protein_coding |             |
| eomesodermin                         | [Source:HGNC Symbol;Acc:HGNC:3372] T-box           |             |             |                |             |
| 0                                    | 2                                                  | 21          | 12          | 64             | 0.214310021 |
| 0.034035384                          | 0.319172269                                        | 0.201754123 | 0.813963265 |                |             |
| ENSG00000181163                      | 18635.84209                                        | 17272.4504  | 19183.43721 |                |             |
| 17056.1853                           | 14502.65368                                        | 14638.9846  | 18363.9099  |                |             |
| 15399.27453                          | 0.253986782                                        | 0.037376383 | 0.175941371 | NPM1           |             |
| 5                                    | 171387116                                          | 171411137   | +           | 3828           |             |
| protein_coding                       | nucleophosmin 1 [Source:HGNC Symbol;Acc:HGNC:7910] |             |             |                |             |
| -                                    | 20541                                              | 19517       | 16502       | 16464          | 12705       |
| 262.7715465                          | 241.5836696                                        | 268.2078596 | 238.9876572 |                |             |
| 204.0093633                          | 206.1298709                                        |             |             |                |             |
| ENSG00000273199                      | 7.258007728                                        | 7.964956378 | 17.43737475 |                |             |
| 29.00711786                          | 62.78205055                                        | 17.25278091 | 10.88677962 |                |             |
| 36.34731644                          | -1.747623121                                       | 0.037389176 | 0.175941371 |                |             |
| AP000692.2                           | 21                                                 | 36319792    | 36320670    | -              | 879         |
| antisense                            | "novel transcript, antisense to MORC3"             |             |             |                |             |
| 8                                    | 9                                                  | 15          | 28          | 55             | 20          |
| 0.485154513                          | 1.061718123                                        | 1.770032334 | 3.846105338 |                |             |
| 1.057967042                          |                                                    |             |             |                |             |
| ENSG00000153208                      | 41.73354444                                        | 15.0449176  | 36.03724115 |                |             |
| 6.215810969                          | 13.69790194                                        | 0           | 30.93856773 | 6.637904302    |             |
| 2.243197366                          | 0.03738953                                         | 0.175941371 | MERTK       | 2              |             |
| 111898479                            | 112029561                                          | +           | 4700        | protein_coding |             |
| "MER proto-oncogene, tyrosine kinase | [Source:HGNC                                       |             |             |                |             |
| Symbol;Acc:HGNC:7027]"               | -                                                  | 46          | 17          | 31             | 6           |
| 0                                    | 0.479279283                                        | 0.171386853 | 0.410365349 |                | 12          |
| 0.070935794                          | 0.156938952                                        | 0           |             |                |             |
| ENSG00000235106                      | 646.8699387                                        | 764.6358123 | 761.4320307 |                |             |
| 890.9329056                          | 1101.539614                                        | 839.3477911 | 724.3125939 |                |             |
| 943.9401036                          | -0.381623998                                       | 0.037396503 | 0.175941371 | BRD30S         |             |
| 9                                    | 134025439                                          | 134034666   | +           | 5994           |             |
| protein_coding                       | BRD3 opposite strand [Source:HGNC                  |             |             |                |             |
| Symbol;Acc:HGNC:24742]               | -                                                  | 713         | 864         | 655            | 860         |
| 973                                  | 5.825074374                                        | 6.830043107 | 6.798786572 |                | 965         |
| 7.972485835                          | 9.895960085                                        | 7.547917069 |             |                |             |
| ENSG00000162836                      | 256.7520234                                        | 298.2433666 | 238.3107882 |                |             |

|                                                   |                                                     |             |             |             |
|---------------------------------------------------|-----------------------------------------------------|-------------|-------------|-------------|
| 442.3585473                                       | 366.4188768                                         | 321.7643639 | 264.4353927 |             |
| 376.8472627                                       | -0.50922611                                         | 0.037398358 | 0.175941371 | ACP6        |
| 1                                                 | 147629652                                           | 147670496   | -           | 11960       |
| protein_coding                                    | "acid phosphatase 6, lysophosphatidic [Source:HGNC  |             |             |             |
| Symbol;Acc:HGNC:29609]"                           | -                                                   | 283         | 337         | 205 427 321 |
| 373                                               | 1.158734504                                         | 1.335134942 | 1.066423061 |             |
| 1.983849576                                       | 1.649761684                                         | 1.450135787 |             |             |
| ENSG00000139637                                   | 854.63041                                           | 1044.294281 | 990.4428857 |             |
| 992.4578181                                       | 1384.629588                                         | 1388.848863 | 963.1225254 |             |
| 1255.31209                                        | -0.382485296                                        | 0.03743014  | 0.176044071 |             |
| C12orf10                                          | 12                                                  | 53299686    | 53307177    | + 2509      |
| protein_coding                                    | chromosome 12 open reading frame 10                 |             |             |             |
| [Source:HGNC Symbol;Acc:HGNC:17590]               | -                                                   | 942         | 1180        | 852         |
| 958                                               | 1213 1610                                           | 18.38564732 | 22.28475105 |             |
| 21.12738664                                       | 21.21665387                                         | 29.71717349 | 29.8370741  |             |
| ENSG00000119397                                   | 536.1853209                                         | 345.1481097 | 387.1097194 |             |
| 421.6391774                                       | 195.1951026                                         | 170.802531  | 422.8143833 |             |
| 262.5456037                                       | 0.688491885                                         | 0.037517113 | 0.176406224 | CNTRL       |
| 9                                                 | 121074863                                           | 121177610   | + 9417      |             |
| protein_coding                                    | centriolin [Source:HGNC Symbol;Acc:HGNC:1858] -     |             |             |             |
| 591                                               | 390 333                                             | 407 171     | 198         | 3.073290362 |
| 1.962359072                                       | 2.200080186                                         | 2.401562439 | 1.116171425 |             |
| 0.977650525                                       |                                                     |             |             |             |
| ENSG00000256594                                   | 51.71330506                                         | 37.16979643 | 27.8997996  |             |
| 17.61146441                                       | 10.27342645                                         | 12.93958568 | 38.9276337  |             |
| 13.60815885                                       | 1.517327584                                         | 0.037532015 | 0.176429397 |             |
| AC010186.2                                        | 12                                                  | 9648047     | 9658412 +   | 2825        |
| transcribed_unprocessed_pseudogene                | C-type lectin domain family 2                       |             |             |             |
| member D pseudogene [Source:NCBI gene;Acc:374443] | -                                                   |             |             | 57          |
| 42                                                | 24 17                                               | 9 15        | 0.988064025 |             |
| 0.704461526                                       | 0.528566502                                         | 0.334381709 | 0.19582648  |             |
| 0.246890185                                       |                                                     |             |             |             |
| ENSG00000115073                                   | 912.6944718                                         | 1040.7543   | 1136.916834 |             |
| 1153.032935                                       | 1348.101849                                         | 1429.392898 | 1030.121868 |             |
| 1310.175894                                       | -0.347782305                                        | 0.037543324 | 0.17643567  | ACTR1B      |
| 2                                                 | 97655963                                            | 97664107    | - 2892      |             |
| protein_coding                                    | ARP1 actin related protein 1 homolog B [Source:HGNC |             |             |             |
| Symbol;Acc:HGNC:168]                              | -                                                   | 1006 1176   | 978 1113    | 1181        |
| 1657                                              | 17.03446019                                         | 19.26794837 | 21.04008126 |             |
| 21.38498349                                       | 25.10145923                                         | 26.64128926 |             |             |
| ENSG00000226935                                   | 0                                                   | 2.654985459 | 2.3249833   | 38.33083431 |
| 0                                                 | 13.80222472                                         | 1.659989586 |             |             |
| 17.37768635                                       | -3.400534765                                        | 0.037562402 | 0.17647844  |             |
| LINC00161                                         | 21                                                  | 28539318    | 28540355    | + 870       |
| lincRNA                                           | long intergenic non-protein coding RNA 161          |             |             |             |
| [Source:HGNC Symbol;Acc:HGNC:17138]               | -                                                   | 0           | 3           | 2           |
| 37                                                | 0 16                                                | 0           | 0.163391117 | 0.143026855 |
| 2.363167553                                       | 0                                                   | 0.855129223 |             |             |
| ENSG00000187741                                   | 1753.716117                                         | 1816.895049 | 1496.126753 |             |
| 1574.672112                                       | 1034.191596                                         | 1300.85968  | 1688.91264  |             |

|                                                  |                                                |                |                                |              |
|--------------------------------------------------|------------------------------------------------|----------------|--------------------------------|--------------|
| 1303.24113                                       | 0.374030963                                    | 0.037603789    | 0.176581596                    | FANCA        |
| 16                                               | 89737549                                       | 89816657       | - 9736                         |              |
| protein_coding                                   | FA complementation group A [Source:HGNC        |                |                                |              |
| Symbol;Acc:HGNC:3582]                            | -                                              | 1933 2053      | 1287 1520                      | 906          |
| 1508                                             | 9.722545234                                    | 9.991595068    | 8.224411436                    |              |
| 8.675111519                                      | 5.719986353                                    | 7.201978067    |                                |              |
| ENSG00000165916                                  | 5057.016884                                    | 5694.058815    | 6704.089345                    |              |
| 4341.743962                                      | 4818.237007                                    | 5058.515361    | 5818.388348                    |              |
| 4739.498777                                      | 0.295592554                                    | 0.037604323    | 0.176581596                    | PSMC3        |
| 11                                               | 47418769                                       | 47426473       | - 2276                         |              |
| protein_coding                                   | "proteasome 26S subunit, ATPase 3 [Source:HGNC |                |                                |              |
| Symbol;Acc:HGNC:9549]"                           | -                                              | 5574 6434      | 5767 4191                      | 4221         |
| 5864                                             | 119.9287729                                    | 133.9476935    | 157.6465752                    |              |
| 102.3192732                                      | 113.996221                                     | 119.7988701    |                                |              |
| ENSG00000115594                                  | 211.3894751                                    | 176.1140355    | 179.0237141                    |              |
| 104.632818                                       | 160.9503478                                    | 64.6979284     | 188.8424082                    |              |
| 110.0936981                                      | 0.783807                                       | 0.037618649    | 0.176587733                    | IL1R1        |
| 2                                                | 102064544                                      | 102179874      | + 7083                         |              |
| protein_coding                                   | interleukin 1 receptor type 1 [Source:HGNC     |                |                                |              |
| Symbol;Acc:HGNC:5993]                            | -                                              | 233 199        | 154 101                        | 141          |
| 75                                               | 1.610895479                                    | 1.331258137    | 1.352727521                    |              |
| 0.792348382                                      | 1.223627506                                    | 0.492351244    |                                |              |
| ENSG00000146555                                  | 30.84653284                                    | 54.86969949    | 84.86189044                    |              |
| 26.93518087                                      | 19.40536108                                    | 0              | 56.85937426 15.44684732        |              |
| 1.88849025                                       | 0.037625596                                    | 0.176587733    | SDK1 7                         |              |
| 3301448                                          | 4269000 +                                      | 12062          | protein_coding sidekick cell   |              |
| adhesion molecule 1 [Source:HGNC                 | Symbol;Acc:HGNC:19307]                         |                |                                | - 34         |
| 62                                               | 73 26                                          | 17 0           | 0.1380347                      |              |
| 0.243555985                                      | 0.376539362                                    | 0.119774969    | 0.086631724 0                  |              |
| ENSG00000169933                                  | 0 0                                            | 0 2.07193699   | 5.707459141                    |              |
| 11.21430759                                      | 0                                              | 6.331234573    | -5.141437813                   |              |
| 0.037638412                                      | 1                                              | FRMPD4 X       | 12138466 12724523              |              |
| +                                                | 8478                                           | protein_coding | FERM and PDZ domain containing |              |
| 4 [Source:HGNC                                   | Symbol;Acc:HGNC:29007]                         |                |                                | - 0 0 0      |
| 2                                                | 5 13                                           | 0 0            | 0 0.013108368                  |              |
| 0.036251331                                      | 0.071298593                                    |                |                                |              |
| ENSG00000152207                                  | 95.26135143                                    | 114.1643748    | 94.16182364                    |              |
| 130.5320304                                      | 134.6960357                                    | 257.0664355    | 101.1958499                    |              |
| 174.0981672                                      | -0.78474054                                    | 0.037796256    | 0.177341639                    |              |
| CYSLTR2 13                                       | 48653711                                       | 48711226       | + 5372                         |              |
| protein_coding                                   | cysteinyl leukotriene receptor 2 [Source:HGNC  |                |                                |              |
| Symbol;Acc:HGNC:18274]                           | -                                              | 105 129        | 81 126                         | 118          |
| 298                                              | 0.957154353                                    | 1.137837249    | 0.938114528                    |              |
| 1.303306571                                      | 1.350185263                                    | 2.579355947    |                                |              |
| ENSG00000154269                                  | 0.907250966                                    | 6.194966072    | 12.78740815 0                  |              |
| 0                                                | 0                                              | 6.629875062 0  | 5.157140379                    |              |
| 0.037818568                                      | 1                                              | ENPP3 6        | 131628442 131747418            |              |
| +                                                | 3885                                           | protein_coding | ectonucleotide                 |              |
| pyrophosphatase/phosphodiesterase 3 [Source:HGNC | Symbol;Acc:HGNC:3358]                          |                |                                | - 1 7 11 0 0 |

|                                       |                                                  |                      |                   |             |
|---------------------------------------|--------------------------------------------------|----------------------|-------------------|-------------|
| 0                                     | 0.012604849                                      | 0.085375539          | 0.17616049        | 0           |
| 0                                     | 0                                                |                      |                   |             |
| ENSG00000175581                       | 909.9727189                                      | 899.1550756          | 1028.80511        |             |
| 885.7530631                           | 623.2545382                                      | 640.9408106          | 945.9776349       |             |
| 716.6494707                           | 0.400210263                                      | 0.037818932          | 0.177400977       | MRPL48      |
| 11                                    | 73787316                                         | 73865133             | + 4386            |             |
| protein_coding                        | mitochondrial ribosomal protein L48 [Source:HGNC |                      |                   |             |
| Symbol;Acc:HGNC:16653]                | -                                                | 1003 1016            | 885 855           | 546         |
| 743                                   | 11.19852926                                      | 10.97618761          | 12.55398166       |             |
| 10.83202194                           | 7.651936821                                      | 7.87682514           |                   |             |
| ENSG00000177302                       | 2485.867647                                      | 2596.575779          | 2180.834335       |             |
| 2848.913361                           | 2596.893909                                      | 3737.814983          | 2421.092587       |             |
| 3061.207418                           | -0.33861086                                      | 0.037840984          | 0.177457362       | TOP3A       |
| 17                                    | 18271428                                         | 18315007             | - 6476            |             |
| protein_coding                        | DNA topoisomerase III alpha [Source:HGNC         |                      |                   |             |
| Symbol;Acc:HGNC:11992]                | -                                                | 2740 2934            | 1876 2750         | 2275        |
| 4333                                  | 20.7191725                                       | 21.46741294          | 18.02323895       |             |
| 23.59597337                           | 21.59344432                                      | 31.11092093          |                   |             |
| ENSG00000197479                       | 11.79426256                                      | 9.734946684          | 17.43737475       | 0           |
| 0                                     | 3.450556181                                      | 12.98886133          | 1.150185394       |             |
| 3.418653336                           | 0.037883565                                      | 0.177609961          | PCDHB11 5         |             |
| 141199582                             | 141203779                                        | + 4198               | protein_coding    |             |
| protocadherin beta 11 [Source:HGNC    | Symbol;Acc:HGNC:8682]                            |                      |                   | -           |
| 13                                    | 11 15                                            | 0 0                  | 4                 | 0.151645526 |
| 0.124158567                           | 0.222308297                                      | 0 0                  | 0                 | 0.044304575 |
| ENSG00000236654                       | 0 0                                              | 0 5.179842475        | 0                 |             |
| 17.25278091                           | 0 7.477541127                                    | -5.383799892         | 0.037904268       |             |
| 1                                     | AC079780.1                                       | 7 23480753           | 23480959          |             |
| +                                     | 207                                              | processed_pseudogene | chromosome 5 open |             |
| reading frame 13 (C5orf13) pseudogene |                                                  | -                    | 0 0 0             |             |
| 5                                     | 0 20                                             | 0 0                  | 0                 | 1.342182903 |
| 0                                     | 4.492526715                                      |                      |                   |             |
| ENSG00000150712                       | 758.4618076                                      | 768.1757929          | 835.8314963       |             |
| 1124.025817                           | 1116.379008                                      | 828.9961225          | 787.4896989       |             |
| 1023.133649                           | -0.377226816                                     | 0.037929489          | 0.17777815        | MTMR12      |
| 5                                     | 32226994                                         | 32313009             | - 5545            |             |
| protein_coding                        | myotubularin related protein 12 [Source:HGNC     |                      |                   |             |
| Symbol;Acc:HGNC:18191]                | -                                                | 836 868              | 719 1085          | 978         |
| 961                                   | 7.383009215                                      | 7.417279005          | 8.067411066       |             |
| 10.87277076                           | 10.84138243                                      | 8.058474859          |                   |             |
| ENSG00000261105                       | 59.87856375                                      | 38.05479158          | 56.96209084       |             |
| 12.43162194                           | 35.38624667                                      | 8.626390453          | 51.63181539       |             |
| 18.81475302                           | 1.468287827                                      | 0.037952213          | 0.177822208       | LM07-       |
| AS1 13                                | 75604700                                         | 75635994             | - 593             |             |
| antisense                             | LM07 antisense RNA 1 [Source:HGNC                |                      |                   |             |
| Symbol;Acc:HGNC:50277]                | -                                                | 66 43                | 49 12             | 31          |
| 10                                    | 5.450268851                                      | 3.435897528          | 5.141007451       |             |
| 1.12444598                            | 3.213322838                                      | 0.784108794          |                   |             |
| ENSG00000196998                       | 650.4989426                                      | 925.7049302          | 725.3947895       |             |
| 1126.097754                           | 1028.484137                                      | 882.4797433          | 767.1995541       |             |

|                                     |                                                   |             |                 |             |
|-------------------------------------|---------------------------------------------------|-------------|-----------------|-------------|
| 1012.353878                         | -0.39917794                                       | 0.037966087 | 0.177822208     | WDR45       |
| X                                   | 49071470                                          | 49101170    | - 5452          |             |
| protein_coding                      | WD repeat domain 45 [Source:HGNC                  |             |                 |             |
| Symbol;Acc:HGNC:28912]              | -                                                 | 717 1046    | 624 1087        | 901         |
| 1023                                | 6.440090822                                       | 9.090803661 | 7.120911513     |             |
| 11.0786219                          | 10.15818935                                       | 8.724706068 |                 |             |
| ENSG00000172238                     | 2.721752898                                       | 4.424975766 | 4.6499666       |             |
| 37.29486582                         | 14.83939377                                       | 7.763751407 | 3.932231754     |             |
| 19.96600366                         | -2.346891188                                      | 0.037975788 | 0.177822208     | ATOH1       |
| 4                                   | 93828753                                          | 93830964    | + 2212          |             |
| protein_coding                      | atonal bHLH transcription factor 1 [Source:HGNC   |             |                 |             |
| Symbol;Acc:HGNC:797]                | bHLH                                              | 3 5         | 4 36            | 13          |
| 9                                   | 0.066414792                                       | 0.107105389 | 0.112507562     |             |
| 0.904335171                         | 0.361248115                                       | 0.189185743 |                 |             |
| ENSG00000008988                     | 12012.91004                                       | 14093.54781 | 14221.92284     |             |
| 15312.65032                         | 15799.38839                                       | 17014.69253 | 13442.79357     |             |
| 16042.24375                         | -0.255121388                                      | 0.0379791   | 0.177822208     | RPS20       |
| 8                                   | 56067295                                          | 56074581    | - 3002          |             |
| protein_coding                      | ribosomal protein S20 [Source:HGNC                |             |                 |             |
| Symbol;Acc:HGNC:10405]              | -                                                 | 13241 15925 | 12234 14781     | 13841       |
| 19724                               | 215.9925547                                       | 251.3594364 | 253.5505955     |             |
| 273.5931204                         | 283.4028027                                       | 305.5028908 |                 |             |
| ENSG00000116062                     | 2867.820303                                       | 2736.405013 | 2405.195224     |             |
| 3259.156885                         | 3056.915116                                       | 3411.737424 | 2669.806847     |             |
| 3242.603142                         | -0.280235362                                      | 0.037995977 | 0.17785415      | MSH6        |
| 2                                   | 47695530                                          | 47810101    | + 10993         |             |
| protein_coding                      | mutS homolog 6 [Source:HGNC Symbol;Acc:HGNC:7329] |             |                 |             |
| -                                   | 3161 3092                                         | 2069 3146   | 2678 3955       |             |
| 14.08111195                         | 13.3275309                                        | 11.709844   | 15.90210197     |             |
| 14.97413364                         | 16.72866476                                       |             |                 |             |
| ENSG00000248309                     | 11.79426256                                       | 2.654985459 | 4.6499666       | 0           |
| 0                                   | 0                                                 | 6.366404872 | 0               | 5.104774216 |
| 0.038084529                         | 1                                                 | MEF2C-AS1   | 5               | 88883328    |
| 89466398                            | + 7865                                            | antisense   | MEF2C antisense | RNA 1       |
| [Source:HGNC Symbol;Acc:HGNC:48908] | -                                                 |             | 13 3            | 4           |
| 0                                   | 0                                                 | 0.080941884 | 0.018073779     |             |
| 0.031642305                         | 0                                                 | 0           |                 |             |
| ENSG00000138231                     | 600.6001395                                       | 515.9521743 | 446.3967936     |             |
| 671.3075847                         | 617.547079                                        | 808.2927854 | 520.9830358     |             |
| 699.0491497                         | -0.423968077                                      | 0.038118999 | 0.178382798     | DBR1        |
| 3                                   | 138161012                                         | 138174949   | - 3160          |             |
| protein_coding                      | debranching RNA lariats 1 [Source:HGNC            |             |                 |             |
| Symbol;Acc:HGNC:15594]              | -                                                 | 662 583     | 384 648         | 541         |
| 937                                 | 10.25887151                                       | 8.741941843 | 7.560508193     |             |
| 11.39462316                         | 10.52343548                                       | 13.78743654 |                 |             |
| ENSG00000267523                     | 47.17705023                                       | 14.15992245 | 23.249833       |             |
| 7.251779464                         | 4.565967313                                       | 10.35166854 | 28.19560189     |             |
| 7.389805107                         | 1.922255162                                       | 0.038140713 | 0.178437203     |             |
| AC008735.2                          | 19                                                | 55661901    | 55674715        | - 561       |
| antisense                           | "novel transcript, antisense to U2AF2A"           | -           |                 |             |



|                                                                                                                         |              |             |                          |          |             |                |             |
|-------------------------------------------------------------------------------------------------------------------------|--------------|-------------|--------------------------|----------|-------------|----------------|-------------|
|                                                                                                                         | 52           | 16          | 20                       | 7        | 4           | 12             | 4.539093888 |
|                                                                                                                         | 1.351398904  |             | 2.21806353               |          | 0.693341543 |                | 0.438272772 |
|                                                                                                                         | 0.994602171  |             |                          |          |             |                |             |
| ENSG00000255363                                                                                                         | 6.350756762  |             | 5.309970919              |          | 6.974949899 |                | 0           |
|                                                                                                                         | 0            | 0           | 6.211892527              | 0        | 5.067326364 |                |             |
| 0.038180501                                                                                                             | 1            | AP001189.5  | 11                       | 76607853 |             |                |             |
| 76630427                                                                                                                | -            | 1725        | lincRNA novel transcript | -        |             |                |             |
|                                                                                                                         | 7            | 6           | 6                        | 0        | 0           | 0.198718191    |             |
|                                                                                                                         | 0.16481191   |             | 0.21640585               | 0        | 0           | 0              |             |
| ENSG00000078902                                                                                                         | 1006.141321  |             | 1214.21335               |          | 1304.315631 |                |             |
| 1327.075642                                                                                                             | 1514.759656  |             | 1632.113074              |          | 1174.890101 |                |             |
| 1491.316124                                                                                                             | -0.344857234 |             | 0.038220937              |          | 0.178765244 |                | TOLLIP      |
|                                                                                                                         | 11           | 1274371     | 1309654                  | -        | 5983        | protein_coding | toll        |
| interacting protein [Source:HGNC Symbol;Acc:HGNC:16476]                                                                 | -            |             |                          |          |             |                | 1109        |
|                                                                                                                         | 1372         | 1122        | 1281                     | 1327     | 1892        | 9.07697683     |             |
| 10.86579606                                                                                                             | 11.66757767  |             | 11.897129                |          | 13.63324628 |                |             |
| 14.70392055                                                                                                             |              |             |                          |          |             |                |             |
| ENSG00000091640                                                                                                         | 694.046989   |             | 760.2108365              |          | 941.6182364 |                |             |
| 583.2502626                                                                                                             | 673.4801786  |             | 555.5395452              |          | 798.625354  |                |             |
| 604.0899955                                                                                                             | 0.402471325  |             | 0.038243023              |          | 0.178821263 |                | SPAG7       |
|                                                                                                                         | 17           | 4959226     | 4967872                  | -        | 2831        | protein_coding | sperm       |
| associated antigen 7 [Source:HGNC Symbol;Acc:HGNC:11216]                                                                | -            |             |                          |          |             |                | -           |
|                                                                                                                         | 765          | 859         | 810                      | 563      | 590         | 644            | 13.23275432 |
|                                                                                                                         | 14.37737946  |             | 17.80131135              |          | 11.0504654  |                | 12.81030596 |
|                                                                                                                         | 10.57735343  |             |                          |          |             |                |             |
| ENSG00000130560                                                                                                         | 1115.918688  |             | 1383.247424              |          | 1055.542418 |                |             |
| 1196.543612                                                                                                             | 1628.908839  |             | 1851.223391              |          | 1184.902844 |                |             |
| 1558.891947                                                                                                             | -0.39559569  |             | 0.038260989              |          | 0.178853794 |                | UBAC1       |
|                                                                                                                         | 9            | 135932969   | 135961380                |          | -           | 2979           |             |
| protein_coding UBA domain containing 1 [Source:HGNC Symbol;Acc:HGNC:30221]                                              | -            |             | 1230                     | 1563     | 908         | 1155           | 1427        |
|                                                                                                                         | 2146         | 20.21916851 | 24.86078946              |          | 18.96366138 |                |             |
| 21.54386032                                                                                                             | 29.44427262  |             | 33.49579057              |          |             |                |             |
| ENSG00000065883                                                                                                         | 2414.19482   |             | 2493.916341              |          | 2399.382765 |                |             |
| 2835.445771                                                                                                             | 2825.192275  |             | 3131.379734              |          | 2435.831309 |                |             |
| 2930.672593                                                                                                             | -0.266961975 |             | 0.038270653              |          | 0.178853794 |                | CDK13       |
|                                                                                                                         | 7            | 39949646    | 40099580                 |          | +           | 25093          |             |
| protein_coding cyclin dependent kinase 13 [Source:HGNC Symbol;Acc:HGNC:1733]                                            | -            |             | 2661                     | 2818     | 2064        | 2737           | 2475        |
|                                                                                                                         | 3630         | 5.193031674 | 5.321264456              |          | 5.117571899 |                |             |
| 6.060860029                                                                                                             | 6.062754419  |             | 6.726436653              |          |             |                |             |
| ENSG00000076641                                                                                                         | 846.4651513  |             | 725.6960256              |          | 839.3189712 |                |             |
| 737.6095684                                                                                                             | 597.0002261  |             | 427.8689665              |          | 803.826716  |                |             |
| 587.4929203                                                                                                             | 0.453236478  |             | 0.038280313              |          | 0.178853794 |                | PAG1        |
|                                                                                                                         | 8            | 80967810    | 81112068                 |          | -           | 11023          |             |
| protein_coding phosphoprotein membrane anchor with glycosphingolipid microdomains 1 [Source:HGNC Symbol;Acc:HGNC:30043] | -            |             |                          |          |             |                | 933         |
|                                                                                                                         | 820          | 722         | 712                      | 523      | 496         | 4.14486624     |             |
| 3.524848746                                                                                                             | 4.075155984  |             | 3.589155131              |          | 2.916414452 |                |             |
| 2.092246679                                                                                                             |              |             |                          |          |             |                |             |

|                                                                |              |             |              |                 |              |
|----------------------------------------------------------------|--------------|-------------|--------------|-----------------|--------------|
| ENSG00000167173                                                | 765.7198153  | 800.0356184 | 957.8931195  |                 |              |
| 934.4435824                                                    | 1077.568286  | 1265.491479 | 841.2161844  |                 |              |
| 1092.501116                                                    | -0.378479466 | 0.038296953 | 0.17888429   |                 |              |
| C15orf39                                                       | 15           | 75195643    | 75212169     | +               | 5812         |
| protein_coding chromosome 15 open reading frame 39             |              |             |              |                 |              |
| [Source:HGNC Symbol;Acc:HGNC:24497]                            | -            | 844         | 904          |                 | 824          |
| 902                                                            | 944          | 1467        | 7.111243086  | 7.37003017      |              |
| 8.820809699                                                    | 8.623686808  | 9.983751182 | 11.73641685  |                 |              |
| ENSG00000198087                                                | 1557.749909  | 1373.512478 | 1268.27839   |                 |              |
| 1285.636902                                                    | 918.9009217  | 1059.320748 | 1399.846925  |                 |              |
| 1087.952857                                                    | 0.363785967  | 0.038374604 | 0.179176887  |                 | CD2AP        |
| 6                                                              | 47477789     | 47627263    | +            | 6751            |              |
| protein_coding CD2 associated protein [Source:HGNC             |              |             |              |                 |              |
| Symbol;Acc:HGNC:14258]                                         | -            | 1717        | 1552         | 1091            | 1241         |
| 1228                                                           | 12.45463116  | 10.89306386 | 10.0545697   |                 | 805          |
| 10.21446718                                                    | 7.329513221  | 8.457875284 |              |                 |              |
| ENSG00000139687                                                | 3993.718752  | 3654.144987 | 4146.607715  |                 |              |
| 3672.508314                                                    | 2934.77549   | 3041.665274 | 3931.490485  |                 |              |
| 3216.316359                                                    | 0.28953436   | 0.038389392 | 0.179176887  |                 | RB1          |
| 13                                                             | 48303726     | 48599436    | +            | 6452            |              |
| protein_coding RB transcriptional corepressor 1 [Source:HGNC   |              |             |              |                 |              |
| Symbol;Acc:HGNC:9884]                                          | -            | 4402        | 4129         | 3567            | 3545         |
| 3526                                                           | 33.41060678  | 30.32333508 | 34.39660643  |                 | 2571         |
| 30.53050054                                                    | 24.49373857  | 25.41083682 |              |                 |              |
| ENSG00000264235                                                | 0            | 0.884995153 | 0            | 0               |              |
| 34.50556181                                                    | 0.294998384  | 11.50185394 | -5.043482551 |                 |              |
| 0.038398192                                                    | 0.179176887  | AP005329.1  | 18           | 3255436         |              |
| 3261850                                                        | -            | 1063        | antisense    | uncharacterized | LOC104968399 |
| [Source:NCBI gene;Acc:104968399]                               | -            | 0           | 1            | 0               |              |
| 0                                                              | 0            | 40          | 0            | 0.044575187     | 0            |
| 0                                                              | 1.749676444  |             |              |                 |              |
| ENSG00000171223                                                | 1170.353746  | 1723.970558 | 2164.559452  |                 |              |
| 1714.527859                                                    | 2592.327942  | 2602.582    | 1686.294585  |                 |              |
| 2303.145933                                                    | -0.450406089 | 0.038400112 | 0.179176887  |                 | JUNB         |
| 19                                                             | 12791496     | 12793315    | +            | 1820            |              |
| protein_coding "JunB proto-oncogene, AP-1 transcription factor |              |             |              |                 |              |
| subunit [Source:HGNC Symbol;Acc:HGNC:6205]"                    |              | TF_bZIP     | 1290         | 1948            |              |
| 1862                                                           | 1655         | 2271        | 3017         | 34.70939197     | 50.71588465  |
| 63.65245159                                                    | 50.52876154  | 76.69960131 | 77.07879922  |                 |              |
| ENSG00000115318                                                | 288.5058072  | 356.6530467 | 326.6601536  |                 |              |
| 242.4166278                                                    | 257.9771532  | 95.75293403 | 323.9396692  |                 |              |
| 198.7155717                                                    | 0.708480859  | 0.038426705 | 0.17925369   |                 | LOXL3        |
| 2                                                              | 74532414     | 74555690    | -            | 4363            |              |
| protein_coding lysyl oxidase like 3 [Source:HGNC               |              |             |              |                 |              |
| Symbol;Acc:HGNC:13869]                                         | -            | 318         | 403          | 281             | 234          |
| 111                                                            | 3.569197586  | 4.37669491  | 4.007079451  |                 | 226          |
| 2.980181319                                                    | 3.183981872  | 1.182956525 |              |                 |              |
| ENSG00000197496                                                | 264.0100311  | 283.198449  | 398.7346359  |                 |              |
| 206.1577305                                                    | 269.3920714  | 103.5166854 | 315.314372   |                 |              |
| 193.0221625                                                    | 0.710316291  | 0.038492589 | 0.179473738  |                 |              |

|                      |             |                                                |             |             |             |        |
|----------------------|-------------|------------------------------------------------|-------------|-------------|-------------|--------|
| SLC2A10              | 20          | 46709487                                       | 46736347    | +           | 5000        |        |
| protein_coding       |             | solute carrier family 2 member 10 [Source:HGNC |             |             |             |        |
| Symbol;Acc:HGNC:     | 13444]      | -                                              | 291         | 320         | 343         | 199    |
|                      | 120         | 2.850044678                                    | 3.03253914  |             | 4.268064386 | 236    |
|                      | 2.211541614 | 2.901278094                                    | 1.115943636 |             |             |        |
| ENSG00000117713      |             | 2944.029385                                    | 2523.121182 |             | 2862.054442 |        |
|                      | 2323.677334 | 2080.939603                                    | 2416.251966 |             | 2776.401669 |        |
|                      | 2273.622968 | 0.287800096                                    | 0.038494169 |             | 0.179473738 | ARID1A |
|                      | 1           | 26693236                                       | 26782110    | +           | 15928       |        |
| protein_coding       |             | AT-rich interaction domain 1A [Source:HGNC     |             |             |             |        |
| Symbol;Acc:HGNC:     | 11110]      | ARID                                           | 3245        | 2851        | 2462        | 2243   |
|                      | 2801        | 9.976590297                                    | 8.481299723 |             | 9.616867849 | 1823   |
|                      | 7.824922956 | 7.035140607                                    | 8.176790674 |             |             |        |
| ENSG00000136783      |             | 463.6052436                                    | 503.5622421 |             | 514.9838009 |        |
|                      | 317.0063594 | 341.3060566                                    | 426.1436884 |             | 494.0504289 |        |
|                      | 361.4853681 | 0.448984256                                    | 0.038521053 |             | 0.17952825  |        |
| NIPSNAP3A            |             | 9                                              | 104747688   | 104760122   | +           | 2585   |
| protein_coding       |             | nipsnap homolog 3A [Source:HGNC                |             |             |             |        |
| Symbol;Acc:HGNC:     | 23619]      | -                                              | 511         | 569         | 443         | 306    |
|                      | 494         | 9.680304895                                    | 10.42985234 |             | 10.66227858 | 299    |
|                      | 6.577682744 | 7.1098101                                      | 8.88581812  |             |             |        |
| ENSG00000176055      |             | 410.0774366                                    | 435.4176153 |             | 385.9472278 |        |
|                      | 502.44472   | 554.7650285                                    | 579.6934384 |             | 410.4807599 |        |
|                      | 545.6343956 | -0.410232466                                   | 0.03852616  |             | 0.17952825  | MBLAC2 |
|                      | 5           | 90458203                                       | 90474768    | -           | 5676        |        |
| protein_coding       |             | metallo-beta-lactamase domain containing 2     |             |             |             |        |
| [Source:HGNC         |             | Symbol;Acc:HGNC:33711]                         |             |             |             |        |
|                      | 485         | 486                                            | 672         | 3.899641932 | 4.107231261 | 332    |
|                      | 3.639171675 | 4.748007491                                    | 5.263095406 |             | 5.505007366 |        |
| ENSG00000257800      |             | 23.58852512                                    | 23.00987398 |             | 13.9498998  |        |
|                      | 62.15810969 | 29.67878753                                    | 62.11001126 |             | 20.1827663  |        |
|                      | 51.31563616 | -1.342871262                                   | 0.038570744 |             | 0.179688674 |        |
| FNBP1P1              |             | 2                                              | 74120680    | 74123218    | +           | 1994   |
| processed_pseudogene |             | formin binding protein 1 pseudogene 1          |             |             |             |        |
| [Source:HGNC         |             | Symbol;Acc:HGNC:44528]                         |             |             |             |        |
|                      | 60          | 26                                             | 72          | 0.638523488 | 0.617838027 | 12     |
|                      | 0.374423362 | 1.672007188                                    | 0.801485287 |             | 1.678952311 |        |
| ENSG00000177380      |             | 156.0471661                                    | 251.3386235 |             | 173.2112558 |        |
|                      | 247.5964703 | 249.9867104                                    | 408.8909075 |             | 193.5323485 |        |
|                      | 302.1580294 | -0.643395145                                   | 0.038593569 |             | 0.179732721 | PPFIA3 |
|                      | 19          | 49119389                                       | 49151026    | +           | 6451        |        |
| protein_coding       |             | PTPRF interacting protein alpha 3 [Source:HGNC |             |             |             |        |
| Symbol;Acc:HGNC:     | 9247]       | -                                              | 172         | 284         | 149         | 239    |
|                      | 474         | 1.305659968                                    | 2.086016498 |             | 1.437030789 | 219    |
|                      | 2.05865183  | 2.086721223                                    | 3.416507024 |             |             |        |
| ENSG00000134013      |             | 4617.000166                                    | 4748.883992 |             | 11018.09586 |        |
|                      | 3087.186115 | 4277.16988                                     | 1948.701603 |             | 6794.660005 |        |
|                      | 3104.352533 | 1.130127447                                    | 0.038606926 |             | 0.179732721 | LOXL2  |
|                      | 8           | 23297189                                       | 23425328    | -           | 5707        |        |
| protein_coding       |             | lysyl oxidase like 2 [Source:HGNC              |             |             |             |        |

|                                                   |                                                                           |             |             |       |             |                        |
|---------------------------------------------------|---------------------------------------------------------------------------|-------------|-------------|-------|-------------|------------------------|
| Symbol;Acc:HGNC:6666]                             | -                                                                         | 5089        | 5366        | 9478  | 2980        | 3747                   |
| 2259                                              | 43.66699052                                                               | 44.55220843 | 103.3274421 |       |             |                        |
| 29.01485705                                       | 40.35740013                                                               | 18.40515065 |             |       |             |                        |
| ENSG00000224631                                   | 210.4822241                                                               | 165.4940936 | 267.3730795 |       |             |                        |
| 127.4241249                                       | 102.7342645                                                               | 167.3519748 | 214.4497991 |       |             |                        |
| 132.5034547                                       | 0.689592845                                                               | 0.038619098 | 0.179732721 |       |             |                        |
| RPS27AP16                                         | 16                                                                        | 61055399    | 61055964    | -     |             | 566                    |
| transcribed_processed_pseudogene                  |                                                                           |             |             |       |             | ribosomal protein S27a |
| pseudogene 16 [Source:HGNC Symbol;Acc:HGNC:36855] |                                                                           |             |             | -     |             | 232                    |
| 187                                               | 230                                                                       | 123         | 90          | 194   | 20.07244318 |                        |
| 15.65494752                                       | 25.28239728                                                               | 12.0753777  | 9.774024841 |       |             |                        |
| 15.93735758                                       |                                                                           |             |             |       |             |                        |
| ENSG00000125266                                   | 451.8109811                                                               | 455.7725039 | 369.6723447 |       |             |                        |
| 626.7609394                                       | 486.2755188                                                               | 614.1990002 | 425.7519432 |       |             |                        |
| 575.7451528                                       | -0.434928041                                                              | 0.038626703 | 0.179732721 |       |             | EFNB2                  |
| 13                                                | 106489731                                                                 | 106535662   | -           | 5019  |             |                        |
| protein_coding                                    | ephrin B2 [Source:HGNC Symbol;Acc:HGNC:3227]                              |             |             |       |             | -                      |
| 498                                               | 515                                                                       | 318         | 605         | 426   | 712         | 4.858932105            |
| 4.862017013                                       | 3.94200137                                                                | 6.698078339 | 5.217227366 |       |             |                        |
| 6.596200014                                       |                                                                           |             |             |       |             |                        |
| ENSG00000272872                                   | 39.01179154                                                               | 35.39980612 | 26.73730795 |       |             |                        |
| 51.79842475                                       | 95.88531357                                                               | 69.01112362 | 33.71630187 |       |             |                        |
| 72.23162064                                       | -1.094129139                                                              | 0.038631003 | 0.179732721 |       |             |                        |
| AP000525.1                                        | 22                                                                        | 15823197    | 15823890    | +     |             | 694                    |
| sense_intronic                                    | "novel transcript, sense intronic to novel transcript"                    |             |             |       |             |                        |
| -                                                 | 43                                                                        | 40          | 23          | 50    | 84          | 80                     |
| 3.034154341                                       | 2.731033087                                                               | 2.061936147 | 4.003340937 |       |             |                        |
| 7.439901329                                       | 5.359959827                                                               |             |             |       |             |                        |
| ENSG00000116761                                   | 152.4181623                                                               | 195.5839288 | 182.511189  |       |             |                        |
| 263.1359977                                       | 302.4953345                                                               | 225.1487908 | 176.8377601 |       |             |                        |
| 263.5933743                                       | -0.574799248                                                              | 0.038666534 | 0.17985073  |       |             | CTH                    |
| 1                                                 | 70411218                                                                  | 70439851    | +           | 2414  |             |                        |
| protein_coding                                    | cystathionine gamma-lyase [Source:HGNC Symbol;Acc:HGNC:2501]              |             |             |       |             |                        |
| -                                                 | 168                                                                       | 221         | 157         | 254   |             | 265                    |
| 261                                               | 3.408008737                                                               | 4.337919104 | 4.046403925 |       |             |                        |
| 5.846668823                                       | 6.747703148                                                               | 5.027293721 |             |       |             |                        |
| ENSG00000189079                                   | 733.0587805                                                               | 506.2172276 | 545.2085838 |       |             |                        |
| 513.8403735                                       | 417.7860091                                                               | 348.5061743 | 594.8281973 |       |             |                        |
| 426.7108523                                       | 0.480444776                                                               | 0.038681749 | 0.179850862 |       |             | ARID2                  |
| 12                                                | 45729665                                                                  | 45908040    | +           | 12127 |             |                        |
| protein_coding                                    | AT-rich interaction domain 2 [Source:HGNC Symbol;Acc:HGNC:18037]          |             |             |       |             |                        |
| ARID                                              | 808                                                                       | 572         | 469         | 496   |             | 366                    |
| 404                                               | 3.26277155                                                                | 2.234956589 | 2.406170022 |       |             |                        |
| 2.272690741                                       | 1.855133073                                                               | 1.549027064 |             |       |             |                        |
| ENSG00000145907                                   | 6171.121071                                                               | 6087.881658 | 5978.694555 |       |             |                        |
| 7648.555398                                       | 6948.260758                                                               | 6968.398208 | 6079.232428 |       |             |                        |
| 7188.404788                                       | -0.241736288                                                              | 0.038686898 | 0.179850862 |       |             | G3BP1                  |
| 5                                                 | 151771045                                                                 | 151812785   | +           | 12406 |             |                        |
| protein_coding                                    | G3BP stress granule assembly factor 1 [Source:HGNC Symbol;Acc:HGNC:30292] |             |             |       |             |                        |
| -                                                 | 6802                                                                      | 6879        | 5143        | 7383  |             | 6087                   |

|                        |                                              |                                            |             |             |             |        |  |
|------------------------|----------------------------------------------|--------------------------------------------|-------------|-------------|-------------|--------|--|
|                        | 8078                                         | 26.84933504                                | 26.27362358 | 25.79239042 |             |        |  |
| 33.06839642            |                                              | 30.15913527                                | 30.27632023 |             |             |        |  |
| ENSG00000273568        |                                              | 30.84653284                                | 53.98470434 | 41.8496994  |             |        |  |
| 67.33795217            |                                              | 70.77249335                                | 121.6321054 | 42.22697886 |             |        |  |
| 86.5808503             |                                              | -1.038189606                               | 0.038708999 | 0.179895153 |             |        |  |
| AC131009.3             | 12                                           | 131934642                                  | 131934928   | +           |             | 287    |  |
|                        | sense_intronic                               | "novel transcript, sense intronic to PUS1" |             |             |             |        |  |
| -                      | 34                                           | 61                                         | 36          | 65          | 62          | 141    |  |
| 5.801305067            |                                              | 10.07104135                                | 7.804183109 | 12.58471844 |             |        |  |
| 13.27874873            |                                              | 22.84379394                                |             |             |             |        |  |
| ENSG00000281849        |                                              | 3.629003864                                | 13.2749273  | 2.3249833   |             | 0      |  |
| 0                      | 0                                            | 6.409638153                                | 0           | 5.117301456 |             |        |  |
| 0.038714812            | 1                                            | AL732314.6                                 | X           | 386980      | 405579      | +      |  |
| 484                    | antisense                                    | "novel transcript, antisense to            |             |             |             |        |  |
| PPP2R3B"               | -                                            | 4                                          | 15          | 2           | 0           | 0      |  |
| 0.40470942             |                                              | 1.468494547                                | 0.257093727 | 0           |             | 0      |  |
| 0                      |                                              |                                            |             |             |             |        |  |
| ENSG00000101294        |                                              | 2962.174404                                | 3086.863094 | 3131.752505 |             |        |  |
| 3532.652568            |                                              | 4045.447039                                | 3478.160631 | 3060.263334 |             |        |  |
| 3685.420079            |                                              | -0.268031437                               | 0.038716764 | 0.179895153 |             | HM13   |  |
| 20                     |                                              | 31514410                                   | 31577923    | +           | 10805       |        |  |
| protein_coding         | histocompatibility minor 13                  | [Source:HGNC                               |             |             |             |        |  |
| Symbol;Acc:HGNC:16435] | -                                            | 3265                                       | 3488        | 2694        | 3410        | 3544   |  |
| 4032                   |                                              | 14.79745739                                | 15.29600954 | 15.512424   |             |        |  |
| 17.53644879            |                                              | 20.16119649                                | 17.35109031 |             |             |        |  |
| ENSG00000230679        |                                              | 6.350756762                                | 8.849951531 | 3.48747495  |             | 0      |  |
| 0                      | 0                                            | 6.229394414                                | 0           | 5.0748986   |             |        |  |
| 0.038786341            | 1                                            | EN01-AS1                                   | 1           | 8878835     | 8879894     | +      |  |
| 456                    | antisense                                    | EN01 antisense RNA 1 [Source:HGNC          |             |             |             |        |  |
| Symbol;Acc:HGNC:40214] | -                                            | 7                                          | 10          | 3           | 0           | 0      |  |
| 0                      |                                              | 0.751729997                                | 1.039110177 | 0.409320276 |             | 0      |  |
| 0                      |                                              |                                            |             |             |             |        |  |
| ENSG00000127952        |                                              | 303.0218226                                | 305.3233278 | 365.0223781 |             |        |  |
| 409.2075555            |                                              | 416.6445173                                | 514.99551   | 324.4558428 |             |        |  |
| 446.9491943            |                                              | -0.464424347                               | 0.038795583 | 0.180214041 |             | STYXL1 |  |
| 7                      |                                              | 75996338                                   | 76048004    | -           | 2028        |        |  |
| protein_coding         | serine/threonine/tyrosine interacting like 1 | [Source:HGNC                               |             |             |             |        |  |
| Symbol;Acc:HGNC:18165] | -                                            |                                            |             | 334         | 345         | 314    |  |
| 395                    |                                              | 365                                        | 597         | 8.065052517 | 8.060789595 |        |  |
| 9.633154906            |                                              | 10.82283877                                | 11.06298374 | 13.68791812 |             |        |  |
| ENSG00000206560        |                                              | 3696.140435                                | 3099.253026 | 3268.926519 |             |        |  |
| 3091.329989            |                                              | 2750.995306                                | 2204.042761 | 3354.773327 |             |        |  |
| 2682.122685            |                                              | 0.323220667                                | 0.038864898 | 0.180462296 |             |        |  |
| ANKRD28                | 3                                            | 15667236                                   | 15859771    | -           | 11276       |        |  |
| protein_coding         | ankyrin repeat domain 28                     | [Source:HGNC                               |             |             |             |        |  |
| Symbol;Acc:HGNC:29024] | -                                            | 4074                                       | 3502        | 2812        | 2984        | 2410   |  |
| 2555                   |                                              | 17.69272149                                | 14.71592329 | 15.51554716 |             |        |  |
| 14.70468736            |                                              | 13.13739735                                | 10.53578393 |             |             |        |  |
| ENSG00000170581        |                                              | 690.4179851                                | 872.605221  | 592.8707414 |             |        |  |
| 886.7890316            |                                              | 877.8072159                                | 1099.864783 | 718.6313158 |             |        |  |

|                                     |                                                    |             |             |                    |
|-------------------------------------|----------------------------------------------------|-------------|-------------|--------------------|
| 954.8203434                         | -0.409445402                                       | 0.03887641  | 0.180462296 | STAT2              |
| 12                                  | 56341597                                           | 56360155    | - 6109      |                    |
| protein_coding                      | signal transducer and activator of transcription 2 |             |             |                    |
| [Source:HGNC Symbol;Acc:HGNC:11363] | STAT                                               | 761         | 986         | 510                |
| 856                                 | 769                                                | 1275        | 6.100187938 | 7.647742039        |
| 5.194059228                         | 7.786023016                                        | 7.737551896 | 9.704453374 |                    |
| ENSG00000224939                     | 0                                                  | 7.964956378 | 0           | 29.00711786        |
| 10.27342645                         | 21.56597613                                        | 2.654985459 |             |                    |
| 20.28217348                         | -2.901826488                                       | 0.038893689 | 0.180462296 |                    |
| LINC00184                           | 1                                                  | 234629311   | 234634780   | + 2270             |
| lincRNA                             | long intergenic non-protein coding RNA 184         |             |             |                    |
| [Source:HGNC Symbol;Acc:HGNC:37192] | -                                                  | 0           | 9           | 0                  |
| 28                                  | 9                                                  | 25          | 0           | 0.187863796        |
| 0.685400186                         | 0.24370476                                         | 0.512088673 |             |                    |
| ENSG00000112183                     | 13.60876449                                        | 23.89486913 | 23.249833   |                    |
| 8.287747959                         | 0                                                  | 0           | 20.25115554 | 2.762582653        |
| 2.881877477                         | 0.038895676                                        | 0.180462296 | RBM24       | 6                  |
| 17281346                            | 17293875                                           | +           | 3444        | protein_coding RNA |
| binding motif protein 24            | [Source:HGNC Symbol;Acc:HGNC:21539]                |             |             | -                  |
| 15                                  | 27                                                 | 20          | 8           | 0                  |
| 0.371472837                         | 0.361304774                                        | 0.129074035 | 0           | 0.213283275        |
| ENSG00000117616                     | 476.3067571                                        | 413.2927365 | 291.7854041 |                    |
| 284.8913361                         | 318.4762201                                        | 185.4673947 | 393.7949659 |                    |
| 262.9449836                         | 0.586398967                                        | 0.038900036 | 0.180462296 | RSRP1              |
| 1                                   | 25242237                                           | 25338213    | -           | 6804               |
| protein_coding                      | arginine and serine rich protein 1 [Source:HGNC    |             |             |                    |
| Symbol;Acc:HGNC:25234]              | -                                                  | 525         | 467         | 251                |
| 215                                 | 3.778537024                                        | 3.252213262 | 2.295177423 | 275                |
| 2.245848377                         | 2.520503231                                        | 1.469282051 |             |                    |
| ENSG00000127774                     | 39.01179154                                        | 94.69448138 | 38.36222445 |                    |
| 14.50355893                         | 22.82983656                                        | 30.19236658 | 57.35616579 |                    |
| 22.50858736                         | 1.348391038                                        | 0.038997156 | 0.180865417 | EMC6               |
| 17                                  | 3668815                                            | 3669668     | +           | 769                |
| membrane protein complex subunit 6  | [Source:HGNC                                       |             |             |                    |
| Symbol;Acc:HGNC:28430]              | -                                                  | 43          | 107         | 33                 |
| 35                                  | 2.738235517                                        | 6.59301219  | 2.669896627 | 14                 |
| 1.011611458                         | 1.598641254                                        | 2.116278027 |             | 20                 |
| ENSG00000176853                     | 2887.779825                                        | 2668.260387 | 2449.369906 |                    |
| 3351.358081                         | 3045.500198                                        | 3289.24268  | 2668.470039 |                    |
| 3228.700319                         | -0.274754664                                       | 0.039092529 | 0.181260222 |                    |
| FAM91A1                             | 8                                                  | 123768456   | 123815452   | + 7246             |
| protein_coding                      | family with sequence similarity 91 member A1       |             |             |                    |
| [Source:HGNC Symbol;Acc:HGNC:26306] | -                                                  | 3183        | 3015        | 2107               |
| 3235                                | 2668                                               | 3813        | 21.51131661 | 19.71584647        |
| 18.09143651                         | 24.80778555                                        | 22.63262125 | 24.46805757 |                    |
| ENSG00000105383                     | 612.394402                                         | 553.1219707 | 534.746159  |                    |
| 435.1067679                         | 433.7668947                                        | 421.8304931 | 566.7541772 |                    |
| 430.2347186                         | 0.398215125                                        | 0.03913711  | 0.181419376 | CD33               |
| 19                                  | 51225064                                           | 51243860    | +           | 5975               |
| protein_coding                      | CD33 molecule [Source:HGNC Symbol;Acc:HGNC:1659]   |             |             |                    |

|                        |                                                 |                |                         |      |             |      |        |
|------------------------|-------------------------------------------------|----------------|-------------------------|------|-------------|------|--------|
| -                      | 675                                             | 625            | 460                     | 420  | 380         | 489  |        |
| 5.532157638            | 4.95642511                                      |                | 4.789903552             |      | 3.905920724 |      |        |
| 3.909246421            | 3.805414491                                     |                |                         |      |             |      |        |
| ENSG00000125356        | 430.9442088                                     |                | 854.9053179             |      | 830.019038  |      |        |
| 311.826517             | 505.6808799                                     |                | 590.045107              |      | 705.2895216 |      |        |
| 469.1841679            | 0.58694765                                      |                | 0.039208462             |      | 0.18169376  |      | NDUFA1 |
| X                      | 119871487                                       |                | 119876662               |      | + 766       |      |        |
| protein_coding         | NADH:ubiquinone                                 | oxidoreductase | subunit A1 [Source:HGNC |      |             |      |        |
| Symbol;Acc:HGNC:7683]  | -                                               | 475            | 966                     | 714  | 301         | 443  |        |
| 684                    | 30.36641504                                     |                | 59.75507525             |      | 57.99309524 |      |        |
| 21.83482772            | 35.54858486                                     |                | 41.52009612             |      |             |      |        |
| ENSG00000150656        | 9.979760626                                     |                | 1.769990306             |      | 3.48747495  |      |        |
| 5.179842475            | 43.37668947                                     |                | 26.7418104              |      | 5.079075294 |      |        |
| 25.09944745            | -2.297358193                                    |                | 0.039217463             |      | 0.18169376  |      | CNDP1  |
| 18                     | 74534440                                        |                | 74587212                |      | + 7177      |      |        |
| protein_coding         | carnosine dipeptidase 1 [Source:HGNC            |                |                         |      |             |      |        |
| Symbol;Acc:HGNC:20675] | -                                               | 11             | 2                       | 3    | 5           | 38   |        |
| 31                     | 0.075054791                                     |                | 0.013204242             |      | 0.026006694 |      |        |
| 0.03871142             | 0.325452799                                     |                | 0.200839793             |      |             |      |        |
| ENSG00000172244        | 216.8329809                                     |                | 188.5039676             |      | 216.2234469 |      |        |
| 164.7189907            | 103.8757564                                     |                | 127.6705787             |      | 207.1867985 |      |        |
| 132.0884419            | 0.648175634                                     |                | 0.03923217              |      | 0.18169376  |      |        |
| C5orf34 5              | 43486701                                        |                | 43515145                |      | - 3011      |      |        |
| protein_coding         | chromosome 5 open reading frame 34 [Source:HGNC |                |                         |      |             |      |        |
| Symbol;Acc:HGNC:24738] | -                                               | 239            | 213                     | 186  | 159         | 91   |        |
| 148                    | 3.887011531                                     |                | 3.351932688             |      | 3.84334203  |      |        |
| 2.934258778            | 1.857710334                                     |                | 2.285503959             |      |             |      |        |
| ENSG00000117020        | 1907.948781                                     |                | 1618.656135             |      | 1968.098363 |      |        |
| 1688.628647            | 1378.922128                                     |                | 1283.606899             |      | 1831.56776  |      |        |
| 1450.385891            | 0.336601272                                     |                | 0.039246151             |      | 0.18169376  |      | AKT3   |
| 1                      | 243488233                                       |                | 243851079               |      | - 9475      |      |        |
| protein_coding         | AKT serine/threonine kinase 3 [Source:HGNC      |                |                         |      |             |      |        |
| Symbol;Acc:HGNC:393]   | -                                               | 2103           | 1829                    | 1693 | 1630        | 1208 |        |
| 1488                   | 10.8689787                                      |                | 9.146626132             |      | 11.11692271 |      |        |
| 9.559175376            | 7.836733458                                     |                | 7.302216932             |      |             |      |        |
| ENSG00000134259        | 93.4468495                                      |                | 61.94966072             |      | 70.91199064 |      |        |
| 24.86324388            | 50.22564044                                     |                | 31.91764468             |      | 75.43616695 |      |        |
| 35.668843              | 1.084927628                                     |                | 0.03924766              |      | 0.18169376  |      | NGF    |
| 1                      | 115285918                                       |                | 115338236               |      | - 1047      |      |        |
| protein_coding         | nerve growth factor [Source:HGNC                |                |                         |      |             |      |        |
| Symbol;Acc:HGNC:7808]  | -                                               | 61             | 24                      | 44   | 37          |      |        |
| -                      | 103                                             | 70             |                         |      |             |      |        |
| 4.817472304            | 3.167946212                                     |                | 3.624849668             |      | 1.27372773  |      |        |
| 2.583172181            | 1.643183482                                     |                |                         |      |             |      |        |
| ENSG00000124164        | 2538.488203                                     |                | 2400.106855             |      | 2356.370574 |      |        |
| 2970.121675            | 2949.614884                                     |                | 2826.868151             |      | 2431.655211 |      |        |
| 2915.534903            | -0.261600224                                    |                | 0.039264242             |      | 0.181722964 |      | VAPB   |
| 20                     | 58389122                                        |                | 58451101                |      | + 10585     |      |        |
| protein_coding         | VAMP associated protein B and C [Source:HGNC    |                |                         |      |             |      |        |
| Symbol;Acc:HGNC:12649] | -                                               | 2798           | 2712                    | 2027 | 2867        | 2584 |        |
| 3277                   | 12.9445075                                      |                | 12.14018385             |      | 11.91433296 |      |        |

|                         |                                                  |                              |                |        |  |  |
|-------------------------|--------------------------------------------------|------------------------------|----------------|--------|--|--|
| 15.05042882             | 15.00544942                                      | 14.39516334                  |                |        |  |  |
| ENSG00000149548         | 642.3336839                                      | 560.2019319                  | 511.496326     |        |  |  |
| 572.8905777             | 332.174122                                       | 225.1487908                  | 571.3439806    |        |  |  |
| 376.7378302             | 0.602347715                                      | 0.039359409                  | 0.18211577     | CCDC15 |  |  |
| 11                      | 124954121                                        | 125041489                    | + 4823         |        |  |  |
| protein_coding          | coiled-coil domain containing 15                 | [Source:HGNC                 |                |        |  |  |
| Symbol;Acc:HGNC:25798]  | -                                                | 708 633                      | 440 553        | 291    |  |  |
| 261                     | 7.188605972                                      | 6.218890198                  | 5.675998358    |        |  |  |
| 6.371180557             | 3.70871181                                       | 2.516252756                  |                |        |  |  |
| ENSG00000213190         | 1577.70943                                       | 1575.291373                  | 2163.39696     |        |  |  |
| 1397.5215               | 1503.344738                                      | 1258.590367                  | 1772.132588    |        |  |  |
| 1386.485535             | 0.353705606                                      | 0.039373016                  | 0.182126699    | MLLT11 |  |  |
| 1                       | 151057758                                        | 151068497                    | + 4075         |        |  |  |
| protein_coding          | "MLLT11, transcription factor 7 cofactor         | [Source:HGNC                 |                |        |  |  |
| Symbol;Acc:HGNC:16997]" | -                                                | 1739 1780                    | 1861 1349      | 1317   |  |  |
| 1459                    | 20.89780404                                      | 20.69754474                  | 28.41355711    |        |  |  |
| 18.39485548             | 19.86577545                                      | 16.64787081                  |                |        |  |  |
| ENSG00000173436         | 214.111228                                       | 320.3682454                  | 370.8348363    |        |  |  |
| 186.4743291             | 198.6195781                                      | 216.5224004                  | 301.7714366    |        |  |  |
| 200.5387692             | 0.587403585                                      | 0.039382363                  | 0.182126699    | MINOS1 |  |  |
| 1                       | 19484403                                         | 19629821                     | + 5480         |        |  |  |
| protein_coding          | mitochondrial inner membrane organizing system 1 | [Source:HGNC                 |                |        |  |  |
| Symbol;Acc:HGNC:32068]  | -                                                | 236 362                      | 319            |        |  |  |
| 180                     | 174 251                                          | 2.10892011                   | 3.130072903    |        |  |  |
| 3.621737511             | 1.82517281                                       | 1.951713427                  | 2.129728198    |        |  |  |
| ENSG00000078967         | 339.3118613                                      | 291.1634054                  | 312.7102538    |        |  |  |
| 545.9553968             | 333.3156138                                      | 458.9239721                  | 314.3951735    |        |  |  |
| 446.0649942             | -0.505475388                                     | 0.039406884                  | 0.182192464    | UBE2D4 |  |  |
| 7                       | 43926438                                         | 43956136                     | + 4713         |        |  |  |
| protein_coding          | ubiquitin conjugating enzyme E2 D4 (putative)    | [Source:HGNC                 |                |        |  |  |
| Symbol;Acc:HGNC:21647]  | -                                                | 374 329                      | 269            |        |  |  |
| 527                     | 292 532                                          | 3.886000445                  | 3.307690752    |        |  |  |
| 3.551090061             | 6.213341428                                      | 3.808314198                  | 5.248620963    |        |  |  |
| ENSG00000269386         | 43.54804637                                      | 29.20484005                  | 30.2247829     |        |  |  |
| 2.07193699              | 14.83939377                                      | 12.93958568                  | 34.32588977    |        |  |  |
| 9.950305478             | 1.786998941                                      | 0.039426462                  | 0.18223535     |        |  |  |
| RAB11B-AS1              | 19 8374373                                       | 8390685 -                    | 1156 antisense |        |  |  |
| RAB11B antisense RNA 1  | [Source:HGNC                                     | Symbol;Acc:HGNC:44178]       |                |        |  |  |
| -                       | 48 33                                            | 26 2                         | 13 15          |        |  |  |
| 2.033349751             | 1.352640998                                      | 1.399337139                  | 0.096135592    |        |  |  |
| 0.691246393             | 0.603343229                                      |                              |                |        |  |  |
| ENSG00000189241         | 966.2222788                                      | 978.8046394                  | 1043.917502    |        |  |  |
| 1118.845974             | 1297.876209                                      | 1323.288295                  | 996.3148066    |        |  |  |
| 1246.67016              | -0.323883116                                     | 0.039482034                  | 0.182444541    | TSPYL1 |  |  |
| 6                       | 116276578                                        | 116279903                    | - 3326         |        |  |  |
| protein_coding          | TSPY like 1                                      | [Source:HGNC                 |                |        |  |  |
| Symbol;Acc:HGNC:12382]  | -                                                | 1065 1106 898 1080 1137 1534 | 15.68036062    |        |  |  |
| 15.75648437             | 16.79813002                                      | 18.04319963                  | 21.01287998    |        |  |  |
| 21.4453991              |                                                  |                              |                |        |  |  |
| ENSG00000251396         | 0 3.539980612                                    | 2.3249833                    | 0              |        |  |  |



|                 |                                                                 |             |              |             |             |             |     |
|-----------------|-----------------------------------------------------------------|-------------|--------------|-------------|-------------|-------------|-----|
| 4.565967313     | 56.07153794                                                     | 1.954987971 |              |             |             |             |     |
| 20.21250175     | -3.378609145                                                    | 0.039627176 | 0.183067413  |             |             |             |     |
| LINC01301       | 8                                                               | 60384588    | 60516795     | -           |             | 4428        |     |
|                 | lincRNA long intergenic non-protein coding RNA 1301             |             |              |             |             |             |     |
|                 | [Source:HGNC Symbol;Acc:HGNC:50464]                             |             |              |             |             |             |     |
|                 | 0                                                               | 4           | 65           | 0           | 0.042803454 | 0.028101482 |     |
|                 | 0                                                               | 0.055526428 | 0.682553602  |             |             |             |     |
| ENSG00000122376 | 1191.220518                                                     | 890.305124  | 978.8179692  |             |             |             |     |
| 1003.853472     | 618.6885709                                                     | 609.885805  | 1020.114537  |             |             |             |     |
| 744.1426158     | 0.455429935                                                     | 0.039650743 | 0.183119086  |             |             | SHLD2       |     |
|                 | 10                                                              | 87094161    | 87191468     | +           | 4242        |             |     |
|                 | protein_coding shieldin complex subunit 2 [Source:HGNC          |             |              |             |             |             |     |
|                 | Symbol;Acc:HGNC:28773]                                          |             |              |             |             |             |     |
|                 | 707                                                             | 15.15733138 | 11.23708736  | 842         | 969         | 542         |     |
| 12.69302562     | 7.853730286                                                     | 7.749608583 |              |             |             |             |     |
| ENSG00000204650 | 205.0387183                                                     | 235.4087107 | 261.5606212  |             |             |             |     |
| 280.7474621     | 342.4475485                                                     | 384.7370142 | 234.0026834  |             |             |             |     |
| 335.9773416     | -0.523852305                                                    | 0.039659066 | 0.183119086  |             |             |             |     |
| LINC02210       | 17                                                              | 45620328    | 45655156     | +           |             | 15578       |     |
|                 | transcribed_unitary_pseudogene long intergenic non-protein      |             |              |             |             |             |     |
|                 | coding RNA 2210 [Source:HGNC Symbol;Acc:HGNC:26327]             |             |              |             |             |             |     |
|                 | 266                                                             | 225         | 271          | 300         | 446         | 0.710436757 | 226 |
| 0.809089151     | 0.89862328                                                      | 0.966650845 | 1.183741614  |             |             |             |     |
| 1.331233314     |                                                                 |             |              |             |             |             |     |
| ENSG00000152558 | 6967.687419                                                     | 6190.541096 | 7059.81179   |             |             |             |     |
| 6253.105835     | 5254.286885                                                     | 5261.235537 | 6739.346768  |             |             |             |     |
| 5589.542752     | 0.269824953                                                     | 0.039676622 | 0.183152342  |             |             |             |     |
| TMEM123 11      | 102396332                                                       | 102470384   | -            | 4647        |             |             |     |
|                 | protein_coding transmembrane protein 123 [Source:HGNC           |             |              |             |             |             |     |
|                 | Symbol;Acc:HGNC:30138]                                          |             |              |             |             |             |     |
|                 | 6099                                                            | 80.93143316 | 71.32495185  | 6073        | 6036        | 4603        |     |
| 72.17530076     | 60.88575035                                                     | 61.02629148 |              |             |             |             |     |
| ENSG00000224239 | 0                                                               | 0           | 0            | 0           | 27.39580388 | 0           |     |
|                 | 0                                                               | 9.131934625 | -5.662217041 | 0.039695473 |             |             |     |
| 0.183161861     | AC090044.1                                                      | 3           | 857124       | 858091      | +           | 497         |     |
|                 | lincRNA novel transcript                                        |             |              |             |             |             |     |
|                 | 0                                                               | 24          | 0            | 0           | 0           | 0           | 0   |
| 2.96826187      | 0                                                               |             |              |             |             |             |     |
| ENSG00000175334 | 3374.973593                                                     | 3972.743242 | 4259.369405  |             |             |             |     |
| 3143.128414     | 3184.762201                                                     | 3235.759059 | 3869.028747  |             |             |             |     |
| 3187.883224     | 0.279106064                                                     | 0.039709079 | 0.183161861  |             |             | BANF1       |     |
|                 | 11                                                              | 66002079    | 66004149     | +           | 1645        |             |     |
|                 | protein_coding barrier to autointegration factor 1 [Source:HGNC |             |              |             |             |             |     |
|                 | Symbol;Acc:HGNC:17397]                                          |             |              |             |             |             |     |
|                 | 3751                                                            | 110.7403065 | 129.3034593  | 3664        | 3034        | 2790        |     |
| 102.4853333     | 104.2523039                                                     | 106.0259518 |              |             |             |             |     |
| ENSG00000175220 | 3222.555431                                                     | 3157.662706 | 3241.02672   |             |             |             |     |
| 3383.473104     | 3929.014873                                                     | 4415.849273 | 3207.081619  |             |             |             |     |
| 3909.44575      | -0.28593019                                                     | 0.039709748 | 0.183161861  |             |             |             |     |
| ARHGAP1 11      | 46677080                                                        | 46700615    | -            | 6138        |             |             |     |

|                                       |                                                    |                |                            |             |             |       |  |
|---------------------------------------|----------------------------------------------------|----------------|----------------------------|-------------|-------------|-------|--|
| protein_coding                        | Rho GTPase activating protein 1 [Source:HGNC       |                |                            |             |             |       |  |
| Symbol;Acc:HGNC:673]                  | -                                                  | 3552           | 3568                       | 2788        | 3266        | 3442  |  |
| 5119                                  | 28.33836284                                        | 27.54383464    | 28.26003738                |             |             |       |  |
| 29.56659687                           | 34.46921097                                        | 38.77834442    |                            |             |             |       |  |
| ENSG00000251093                       | 2.721752898                                        | 15.92991276    | 1.16249165                 | 0           |             |       |  |
| 0                                     | 0                                                  | 6.604719101    | 0                          | 5.161409556 |             |       |  |
| 0.039726684                           | 1                                                  | AC093281.2     | 5                          | 91226475    |             |       |  |
| 91227071                              | -                                                  | 597            | lincRNA novel transcript   |             |             | -     |  |
| 3                                     | 18                                                 | 1              | 0                          | 0           | 0.246079597 |       |  |
| 1.428645951                           | 0.104215548                                        | 0              | 0                          | 0           | 0           |       |  |
| ENSG00000167191                       | 2.721752898                                        | 15.92991276    | 1.16249165                 | 0           |             |       |  |
| 0                                     | 0                                                  | 6.604719101    | 0                          | 5.161409556 |             |       |  |
| 0.039726684                           | 1                                                  | GPRC5B         | 16                         | 19856691    | 19886167    |       |  |
| -                                     | 6667                                               | protein_coding | G protein-coupled receptor |             |             |       |  |
| class C group 5 member B [Source:HGNC | Symbol;Acc:HGNC:13308]                             |                |                            |             |             | -     |  |
| 3                                     | 18                                                 | 1              | 0                          | 0           | 0.022035326 |       |  |
| 0.127928849                           | 0.009332036                                        | 0              | 0                          | 0           | 0           |       |  |
| ENSG00000230251                       | 0                                                  | 3.539980612    | 0                          | 20.7193699  |             |       |  |
| 7.990442797                           | 10.35166854                                        | 1.179993537    |                            |             |             |       |  |
| 13.02049375                           | -3.415658785                                       | 0.039733041    | 0.183208025                |             |             | PHBP4 |  |
| 2                                     | 154286589                                          | 154287425      | +                          | 837         |             |       |  |
| processed_pseudogene                  | prohibitin pseudogene 4 [Source:HGNC               |                |                            |             |             |       |  |
| Symbol;Acc:HGNC:8916]                 | -                                                  | 0              | 4                          | 0           | 20          | 7     |  |
| 12                                    | 0                                                  | 0.226444082    | 0                          | 1.327750829 |             |       |  |
| 0.514067256                           | 0.666632996                                        |                |                            |             |             |       |  |
| ENSG00000124243                       | 52.62055603                                        | 90.26950562    | 56.96209084                |             |             |       |  |
| 84.94941658                           | 138.1205112                                        | 145.7859987    | 66.61738416                |             |             |       |  |
| 122.9519755                           | -0.88235043                                        | 0.039740471    | 0.183208025                |             |             | BCAS4 |  |
| 20                                    | 50794894                                           | 50882676       | +                          | 7583        |             |       |  |
| protein_coding                        | breast carcinoma amplified sequence 4 [Source:HGNC |                |                            |             |             |       |  |
| Symbol;Acc:HGNC:14367]                | -                                                  | 58             | 102                        | 49          | 82          | 121   |  |
| 169                                   | 0.374555019                                        | 0.637361104    | 0.402033156                |             |             |       |  |
| 0.600875975                           | 0.980825333                                        | 1.036278927    |                            |             |             |       |  |
| ENSG00000115561                       | 1163.095738                                        | 1054.914223    | 1235.728624                |             |             |       |  |
| 964.4866688                           | 946.2967256                                        | 827.2708444    | 1151.246195                |             |             |       |  |
| 912.6847462                           | 0.335109118                                        | 0.039764065    | 0.183246089                |             |             | CHMP3 |  |
| 2                                     | 86503431                                           | 86563479       | -                          | 7018        |             |       |  |
| protein_coding                        | charged multivesicular body protein 3 [Source:HGNC |                |                            |             |             |       |  |
| Symbol;Acc:HGNC:29865]                | -                                                  | 1282           | 1192                       | 1063        | 931         | 829   |  |
| 959                                   | 8.945473734                                        | 8.048025288    | 9.4238149                  |             |             |       |  |
| 7.371372545                           | 7.260867755                                        | 6.35383981     |                            |             |             |       |  |
| ENSG00000129480                       | 323.8885949                                        | 366.3879934    | 292.9478958                |             |             |       |  |
| 454.7901693                           | 414.3615336                                        | 472.7261968    | 327.7414947                |             |             |       |  |
| 447.2926332                           | -0.447969464                                       | 0.039769446    | 0.183246089                |             |             | DTD2  |  |
| 14                                    | 31446036                                           | 31457510       | -                          | 2971        |             |       |  |
| protein_coding                        | D-tyrosyl-tRNA deacylase 2 (putative) [Source:HGNC |                |                            |             |             |       |  |
| Symbol;Acc:HGNC:20277]                | -                                                  | 357            | 414                        | 252         | 439         | 363   |  |
| 548                                   | 5.884292434                                        | 6.602738997    | 5.277214361                |             |             |       |  |
| 8.210581419                           | 7.510197074                                        | 8.576476951    |                            |             |             |       |  |
| ENSG00000256407                       | 0                                                  | 0              | 1.16249165                 | 18.64743291 | 0           |       |  |

|                                                               |                                                        |                |                          |                |                |        |
|---------------------------------------------------------------|--------------------------------------------------------|----------------|--------------------------|----------------|----------------|--------|
|                                                               | 8.626390453                                            | 0.387497217    | 9.091274454              | -4.700302073   |                |        |
|                                                               | 0.039781837                                            | 0.183255447    | AL357673.1               | 1              |                |        |
| 54132686                                                      | 54200073                                               | -              | 3952                     | protein_coding | novel          |        |
| transcript                                                    | -                                                      | 0              | 0                        | 1              | 18             | 0      |
| 0                                                             | 0                                                      | 0.015743088    | 0.253085703              | 0              |                | 10     |
| 0.117656001                                                   |                                                        |                |                          |                |                |        |
| ENSG00000152049                                               | 157.8616681                                            | 149.5641809    | 185.998664               |                |                |        |
| 70.44585765                                                   | 122.1396256                                            | 104.3793245    | 164.4748376              |                |                |        |
| 98.98826925                                                   | 0.732146782                                            | 0.039800336    | 0.183292928              |                |                | KCNE4  |
| 2                                                             | 223051814                                              | 223198399      | +                        | 4124           |                |        |
| protein_coding                                                | potassium voltage-gated channel subfamily E regulatory |                |                          |                |                |        |
| subunit 4 [Source:HGNC Symbol;Acc:HGNC:6244]                  | -                                                      | 174            | 169                      |                |                |        |
| 160                                                           | 68                                                     | 107            | 121                      | 2.066137762    | 1.941755253    |        |
| 2.413838293                                                   | 0.916225342                                            | 1.594822967    | 1.364261841              |                |                |        |
| ENSG00000148730                                               | 2668.225091                                            | 2449.666584    | 2271.508684              |                |                |        |
| 2819.906243                                                   | 2732.731437                                            | 3655.864274    | 2463.133453              |                |                |        |
| 3069.500651                                                   | -0.317694284                                           | 0.039830462    | 0.183381537              |                |                |        |
| EIF4EBP2                                                      | 10                                                     | 70404379       | 70428618                 | +              |                | 7257   |
| protein_coding                                                | eukaryotic translation initiation factor 4E            |                |                          |                |                |        |
| binding protein 2 [Source:HGNC Symbol;Acc:HGNC:3289]          | -                                                      | 2941           |                          |                |                |        |
| 2768                                                          | 1954                                                   | 2722           | 2394                     | 4238           | 19.84570745    |        |
| 18.07321452                                                   | 16.75229387                                            | 20.84217516    | 20.27749874              |                |                |        |
| 27.15406464                                                   |                                                        |                |                          |                |                |        |
| ENSG00000180660                                               | 69.85832438                                            | 29.20484005    | 76.72444889              |                |                |        |
| 3.107905485                                                   | 15.98088559                                            | 37.95611799    | 58.59587111              |                |                |        |
| 19.01496969                                                   | 1.611518766                                            | 0.03984031     | 0.183381537              |                |                |        |
| MAB21L1 13                                                    | 35474182                                               | 35477209       | -                        | 3028           |                |        |
| protein_coding                                                | mab-21 like 1 [Source:HGNC Symbol;Acc:HGNC:6757]       |                |                          |                |                |        |
| -                                                             | 77                                                     | 33             | 66                       | 3              | 14             | 44     |
| 1.245270035                                                   | 0.51639795                                             | 1.356109978    | 0.055052548              |                |                |        |
| 0.284197023                                                   | 0.675659401                                            |                |                          |                |                |        |
| ENSG00000226650                                               | 3.629003864                                            | 3.539980612    | 11.6249165               | 0              |                |        |
| 0                                                             | 0                                                      | 6.264633658    | 0                        | 5.075265043    |                |        |
| 0.039846684                                                   | 1                                                      | KIF4B          | 5                        | 155013755      | 155018132      |        |
| +                                                             | 4378                                                   | protein_coding | kinesin family member 4B |                |                |        |
| [Source:HGNC Symbol;Acc:HGNC:6322]                            | -                                                      | 4              | 4                        | 10             |                |        |
| 0                                                             | 0                                                      | 0              | 0.044741745              | 0.043292302    |                |        |
| 0.142112111                                                   | 0                                                      | 0              | 0                        |                |                |        |
| ENSG00000187889                                               | 0                                                      | 2.654985459    | 0                        | 27.97114936    |                |        |
| 14.83939377                                                   | 0                                                      | 0.884995153    | 14.27018104              | -3.960648817   |                |        |
| 0.039876018                                                   | 0.183455912                                            | FYB2           | 1                        | 56718804       |                |        |
| 56819696                                                      | -                                                      | 4633           | protein_coding           | FYN binding    |                |        |
| protein 2 [Source:HGNC Symbol;Acc:HGNC:27295]                 | -                                                      | 0              | 3                        |                |                |        |
| 0                                                             | 27                                                     | 13             | 0                        | 0              | 0.030682122    | 0      |
| 0.323827336                                                   | 0.172475897                                            | 0              |                          |                |                |        |
| ENSG00000163702                                               | 622.3741627                                            | 613.3016411    | 605.6581496              |                |                |        |
| 507.6245625                                                   | 418.9275009                                            | 476.176753     | 613.7779845              |                |                |        |
| 467.5762721                                                   | 0.392070419                                            | 0.039877211    | 0.183455912              |                |                | IL17RC |
| 3                                                             | 9917074                                                | 9933630        | +                        | 4540           | protein_coding |        |
| interleukin 17 receptor C [Source:HGNC Symbol;Acc:HGNC:18358] | -                                                      |                |                          |                |                |        |

|                                      |                                                        |           |             |      |             |      |               |        |
|--------------------------------------|--------------------------------------------------------|-----------|-------------|------|-------------|------|---------------|--------|
|                                      | 686                                                    | 693       | 521         | 490  | 367         | 552  | 7.399407516   |        |
|                                      | 7.232756139                                            |           | 7.139843904 |      | 5.997251625 |      | 4.96886928    |        |
|                                      | 5.653458949                                            |           |             |      |             |      |               |        |
| ENSG00000136802                      | 2340.707492                                            |           | 2517.811211 |      | 2286.621075 |      |               |        |
| 2933.862778                          | 2730.448453                                            |           | 2929.522198 |      | 2381.713259 |      |               |        |
| 2864.611143                          | -0.266272629                                           |           | 0.039910361 |      | 0.183543774 |      |               | LRRC8A |
| 9                                    | 128882112                                              |           | 128918039   |      | +           | 5230 |               |        |
| protein_coding                       | leucine rich repeat containing 8 VRAC subunit A        |           |             |      |             |      |               |        |
| [Source:HGNC Symbol;Acc:HGNC:19027]  |                                                        |           | -           |      | 2580        | 2845 | 1967          |        |
| 2832                                 | 2392                                                   | 3396      | 24.15720588 |      | 25.77549549 |      |               |        |
| 23.39965841                          | 30.08871244                                            |           | 28.11297761 |      | 30.1923565  |      |               |        |
| ENSG00000273162                      | 11.79426256                                            |           | 8.849951531 |      | 15.11239145 |      |               |        |
| 3.107905485                          | 0                                                      | 0         | 11.91886851 |      | 1.035968495 |      |               |        |
| 3.537369678                          | 0.039917061                                            |           | 0.183543774 |      | AL133215.2  |      | 10            |        |
| 101060029                            |                                                        | 101061005 | -           |      | 977         |      | lincRNA novel |        |
| transcript                           | -                                                      | 13        | 10          | 13   | 3           | 0    | 0             |        |
|                                      | 0.651594593                                            |           | 0.484988987 |      | 0.827857591 |      | 0.170623456   |        |
|                                      | 0                                                      | 0         |             |      |             |      |               |        |
| ENSG00000100647                      | 540.7215757                                            |           | 505.3322324 |      | 520.7962592 |      |               |        |
| 442.3585473                          | 313.9102527                                            |           | 396.8139608 |      | 522.2833558 |      |               |        |
| 384.3609203                          | 0.441450181                                            |           | 0.039960609 |      | 0.183696261 |      |               | SUSD6  |
| 14                                   | 69611596                                               |           | 69715142    |      | +           | 5830 |               |        |
| protein_coding                       | sushi domain containing 6 [Source:HGNC                 |           |             |      |             |      |               |        |
| Symbol;Acc:HGNC:19956]               |                                                        |           | -           | 596  | 571         | 448  | 427           | 275    |
| 460                                  | 5.006179166                                            |           | 4.640812202 |      | 4.780973163 |      |               |        |
| 4.069784036                          | 2.899422463                                            |           | 3.668768386 |      |             |      |               |        |
| ENSG00000183011                      | 873.6826802                                            |           | 1336.342681 |      | 1315.940548 |      |               |        |
| 614.3293175                          | 971.4095458                                            |           | 979.0953164 |      | 1175.32197  |      |               |        |
| 854.9447265                          | 0.458668391                                            |           | 0.04000776  |      | 0.18386523  |      |               | NAA38  |
| 17                                   | 7856685                                                | 7885238   | -           | 1943 |             |      |               |        |
| protein_coding                       | "N(alpha)-acetyltransferase 38, NatC auxiliary subunit |           |             |      |             |      |               |        |
| [Source:HGNC Symbol;Acc:HGNC:28212]" |                                                        |           | -           |      | 963         | 1510 | 1132          |        |
| 593                                  | 851                                                    | 1135      | 24.27069262 |      | 36.82396826 |      |               |        |
| 36.24770151                          | 16.95875384                                            |           | 26.92180162 |      | 27.16152056 |      |               |        |
| ENSG00000159128                      | 951.7062633                                            |           | 1240.763205 |      | 1493.80177  |      |               |        |
| 727.2498834                          | 1023.91817                                             |           | 998.9360144 |      | 1228.757079 |      |               |        |
| 916.7013559                          | 0.421911274                                            |           | 0.040083823 |      | 0.1841025   |      |               | IFNGR2 |
| 21                                   | 33402896                                               |           | 33479348    |      | +           | 2960 |               |        |
| protein_coding                       | interferon gamma receptor 2 [Source:HGNC               |           |             |      |             |      |               |        |
| Symbol;Acc:HGNC:5440]                |                                                        |           | -           | 1049 | 1402        | 1285 | 702           | 897    |
| 1158                                 | 17.35451418                                            |           | 22.44309477 |      | 27.00960688 |      |               |        |
| 13.17824098                          | 18.62722207                                            |           | 18.19063528 |      |             |      |               |        |
| ENSG00000008083                      | 332.9611045                                            |           | 281.4284587 |      | 363.8598864 |      |               |        |
| 382.2723746                          | 465.7286659                                            |           | 505.5064805 |      | 326.0831499 |      |               |        |
| 451.1691737                          | -0.470185086                                           |           | 0.040084934 |      | 0.1841025   |      |               | JARID2 |
| 6                                    | 15246296                                               |           | 15522040    |      | +           | 6015 |               |        |
| protein_coding                       | jumonji and AT-rich interaction domain containing 2    |           |             |      |             |      |               |        |
| [Source:HGNC Symbol;Acc:HGNC:6196]   |                                                        |           | ARID        |      | 367         | 318  | 313           |        |
| 369                                  | 408                                                    | 586       | 2.987852239 |      | 2.505058828 |      |               |        |
| 3.237543054                          | 3.408809866                                            |           | 4.169383963 |      | 4.529945765 |      |               |        |

|                  |                                                 |                         |                           |             |             |      |      |
|------------------|-------------------------------------------------|-------------------------|---------------------------|-------------|-------------|------|------|
| ENSG00000227946  | 33.56828574                                     | 41.5947722              | 33.71225785               |             |             |      |      |
| 17.61146441      | 12.55641011                                     | 6.901112362             | 36.29177193               |             |             |      |      |
| 12.35632896      | 1.562159736                                     | 0.040090612             | 0.1841025                 |             |             |      |      |
| AC007383.2       | 2                                               | 206084605               | 206086564                 | +           | 1034        |      |      |
| lincRNA          | novel transcript                                | -                       | 37                        | 47          | 29          |      |      |
| 17               | 11                                              | 8                       | 1.752305681               | 2.153792003 |             |      |      |
| 1.744955298      | 0.913567048                                     | 0.6539123               | 0.359749721               |             |             |      |      |
| ENSG00000100228  | 303.9290736                                     | 384.9728916             | 359.2099198               |             |             |      |      |
| 473.4376022      | 349.2964994                                     | 712.5398514             | 349.3706283               |             |             |      |      |
| 511.7579843      | -0.552669639                                    | 0.040130163             | 0.184236298               |             | RAB36       |      |      |
| 22               | 23145326                                        | 23164350                | +                         | 4107        |             |      |      |
| protein_coding   | "RAB36, member RAS oncogene family [Source:HGNC |                         |                           |             |             |      |      |
| Symbol;Acc:HGNC: | 9775]"                                          | -                       | 335                       | 435         | 309         | 457  | 306  |
| 826              | 3.994374566                                     | 5.018697216             | 4.681021363               |             |             |      |      |
| 6.183061139      | 4.579774386                                     | 9.351609481             |                           |             |             |      |      |
| ENSG00000096060  | 780.2358307                                     | 587.6367817             | 657.9702738               |             |             |      |      |
| 536.6316804      | 581.0193405                                     | 263.9675479             | 675.2809621               |             |             |      |      |
| 460.5395229      | 0.554223909                                     | 0.040173635             | 0.18438802                |             | FKBP5       |      |      |
| 6                | 35573585                                        | 35728583                | -                         | 10628       |             |      |      |
| protein_coding   | FK506 binding protein 5 [Source:HGNC            |                         |                           |             |             |      |      |
| Symbol;Acc:HGNC: | 3721]"                                          | -                       | 860                       | 664         | 566         | 518  | 509  |
| 306              | 3.962557608                                     | 2.960349414             | 3.313383705               |             |             |      |      |
| 2.70825939       | 2.943835897                                     | 1.338754362             |                           |             |             |      |      |
| ENSG00000128886  | 15.42326642                                     | 0.884995153             | 3.48747495                |             | 0           |      |      |
| 0                | 0                                               | 6.598578841             | 0                         | 5.157247737 |             |      |      |
| 0.040181013      | 1                                               | ELL3                    | 15                        | 43772600    | 43777543    |      |      |
| -                | 2880                                            | protein_coding          | elongation factor for RNA |             |             |      |      |
| polymerase II 3  | [Source:HGNC                                    | Symbol;Acc:HGNC:23113]" | -                         |             | 17          |      |      |
| 1                | 3                                               | 0                       | 0                         | 0           | 0.289058082 |      |      |
| 0.016452578      | 0.064809044                                     | 0                       | 0                         | 0           |             |      |      |
| ENSG00000184436  | 820.1548732                                     | 1238.993214             | 967.1930527               |             |             |      |      |
| 1062.903676      | 1414.308375                                     | 1549.299725             | 1008.78038                |             |             |      |      |
| 1342.170592      | -0.411963463                                    | 0.04023596              | 0.184626173               |             | THAP7       |      |      |
| 22               | 20999104                                        | 21002196                | -                         | 2879        |             |      |      |
| protein_coding   | THAP domain containing 7 [Source:HGNC           |                         |                           |             |             |      |      |
| Symbol;Acc:HGNC: | 23190]"                                         | THAP                    | 904                       | 1400        | 832         | 1026 | 1239 |
| 1796             | 15.37642765                                     | 23.04160947             | 17.97995117               |             |             |      |      |
| 19.80239593      | 26.45312607                                     | 29.00652383             |                           |             |             |      |      |
| ENSG00000162889  | 3081.931531                                     | 3309.881873             | 3563.036907               |             |             |      |      |
| 3276.768349      | 4441.544703                                     | 4733.300441             | 3318.283437               |             |             |      |      |
| 4150.537831      | -0.323123945                                    | 0.040316131             | 0.184946071               |             |             |      |      |
| MAPKAPK2         | 1                                               | 206684944               | 206734283                 | +           | 4195        |      |      |
| protein_coding   | mitogen-activated protein kinase-activated      |                         |                           |             |             |      |      |
| protein kinase 2 | [Source:HGNC                                    | Symbol;Acc:HGNC:6887]"  | -                         |             | 3397        |      |      |
| 3740             | 3065                                            | 3163                    | 3891                      | 5487        | 39.65448055 |      |      |
| 42.24410154      | 45.45748042                                     | 41.89664726             | 57.01335863               |             |             |      |      |
| 60.81826312      |                                                 |                         |                           |             |             |      |      |
| ENSG00000113739  | 448.1819772                                     | 768.1757929             | 1165.979125               |             |             |      |      |
| 536.6316804      | 342.4475485                                     | 665.0947039             | 794.1122983               |             |             |      |      |
| 514.7246442      | 0.62324488                                      | 0.040347585             | 0.185017458               |             | STC2        |      |      |

|                        |                                            |              |                        |        |      |
|------------------------|--------------------------------------------|--------------|------------------------|--------|------|
| 5                      | 173314713                                  | 173329503    | -                      | 6128   |      |
| protein_coding         | stanniocalcin 2                            | [Source:HGNC | Symbol;Acc:HGNC:11374] |        |      |
| -                      | 494 868                                    | 1003 518     | 300                    | 771    |      |
| 3.947633955            | 6.71162077                                 | 10.18331137  | 4.697026893            |        |      |
| 3.009191721            | 5.850145122                                |              |                        |        |      |
| ENSG00000100227        | 2521.250434                                | 2469.136477  | 2543.53173             |        |      |
| 2450.06549             | 3296.6284                                  | 3763.694155  | 2511.306214            |        |      |
| 3170.129348            | -0.336361617                               | 0.040352612  | 0.185017458            |        |      |
| POLDIP3 22             | 42583721                                   | 42614962     | -                      | 3650   |      |
| protein_coding         | DNA polymerase delta interacting protein 3 |              |                        |        |      |
| [Source:HGNC           | Symbol;Acc:HGNC:23782]                     | -            | 2779                   | 2790   | 2188 |
| 2365                   | 2888 4363                                  | 37.28416024  | 36.21911044            |        |      |
| 37.29591787            | 36.00396445                                | 48.63530958  | 55.5806174             |        |      |
| ENSG00000169193        | 327.5175987                                | 323.0232309  | 281.3229793            |        |      |
| 335.6537923            | 543.3501102                                | 442.5338302  | 310.6212696            |        |      |
| 440.5125776            | -0.502547975                               | 0.040376159  | 0.18507745             |        |      |
| CCDC126 7              | 23597379                                   | 23644708     | +                      | 3550   |      |
| protein_coding         | coiled-coil domain containing 126          | [Source:HGNC |                        |        |      |
| Symbol;Acc:HGNC:22398] | -                                          | 361 365      | 242 324                | 476    |      |
| 513                    | 4.97974991                                 | 4.87181684   | 4.241249872            |        |      |
| 5.071409745            | 8.241873792                                | 6.71923809   |                        |        |      |
| ENSG00000103855        | 2533.044697                                | 2554.096012  | 3547.924515            |        |      |
| 2166.210123            | 2349.190182                                | 2351.554037  | 2878.355075            |        |      |
| 2288.984781            | 0.329959793                                | 0.040388688  | 0.185086917            | CD276  |      |
| 15                     | 73683966                                   | 73714518     | +                      | 5542   |      |
| protein_coding         | CD276 molecule                             | [Source:HGNC | Symbol;Acc:HGNC:19137] |        |      |
| -                      | 2792 2886                                  | 3052 2091    | 2058 2726              |        |      |
| 24.67047867            | 24.674948                                  | 34.26295804  | 20.96522632            |        |      |
| 22.82581059            | 22.87127355                                |              |                        |        |      |
| ENSG00000197050        | 128.8296372                                | 129.2092924  | 158.0988644            |        |      |
| 187.5102976            | 332.174122                                 | 160.4508624  | 138.712598             |        |      |
| 226.7117607            | -0.707724594                               | 0.040410418  | 0.185138536            | ZNF420 |      |
| 19                     | 37007857                                   | 37130314     | +                      | 4023   |      |
| protein_coding         | zinc finger protein 420                    | [Source:HGNC |                        |        |      |
| Symbol;Acc:HGNC:20649] | zf-C2H2 142 146                            | 136 181      | 291                    |        |      |
| 186                    | 1.728490494                                | 1.719607236  | 2.103273366            |        |      |
| 2.500003323            | 4.446213537                                | 2.149779562  |                        |        |      |
| ENSG00000150627        | 261.2882782                                | 187.6189725  | 140.6614896            |        |      |
| 378.1285006            | 251.1282022                                | 282.0829678  | 196.5229134            |        |      |
| 303.7798902            | -0.625920152                               | 0.040461189  | 0.18529574             | WDR17  |      |
| 4                      | 176065834                                  | 176182818    | +                      | 7808   |      |
| protein_coding         | WD repeat domain 17                        | [Source:HGNC |                        |        |      |
| Symbol;Acc:HGNC:16661] | -                                          | 288 212      | 121 365                | 220    |      |
| 327                    | 1.806264584                                | 1.286537641  | 0.964167331            |        |      |
| 2.597557102            | 1.731929607                                | 1.947327362  |                        |        |      |
| ENSG00000165006        | 894.5494525                                | 979.6896345  | 789.3318303            |        |      |
| 925.1198659            | 1297.876209                                | 1243.062864  | 887.8569724            |        |      |
| 1155.35298             | -0.379273509                               | 0.040473469  | 0.18529574             | UBAP1  |      |
| 9                      | 34179005                                   | 34252523     | +                      | 2772   |      |
| protein_coding         | ubiquitin associated protein 1             | [Source:HGNC |                        |        |      |

|                        |                                                     |             |          |             |       |        |
|------------------------|-----------------------------------------------------|-------------|----------|-------------|-------|--------|
| Symbol;Acc:HGNC:12461] | -                                                   | 986         | 1107     | 679         | 893   | 1137   |
| 1441                   | 17.41856496                                         | 18.92260117 |          | 15.23994483 |       |        |
| 17.90071081            | 25.21242382                                         | 24.1713982  |          |             |       |        |
| ENSG00000100345        | 15869.6339                                          | 16109.56677 |          | 17723.34769 |       |        |
| 15406.92346            | 13816.61709                                         | 12179.60068 |          | 16567.51612 |       |        |
| 13801.04707            | 0.263594488                                         | 0.040476157 |          | 0.18529574  |       | MYH9   |
| 22                     | 36281277                                            | 36388067    |          | -           | 9012  |        |
| protein_coding         | myosin heavy chain 9 [Source:HGNC                   |             |          |             |       |        |
| Symbol;Acc:HGNC:7579]  | -                                                   | 17492       | 18203    | 15246       | 14872 | 12104  |
| 14119                  | 95.04887243                                         | 95.7079969  |          | 105.2547197 |       |        |
| 91.69807894            | 82.55722606                                         | 72.84735259 |          |             |       |        |
| ENSG00000261188        | 78.02358307                                         | 96.46447169 |          | 81.37441549 |       |        |
| 162.6470537            | 108.4417237                                         | 160.4508624 |          | 85.28749009 |       |        |
| 143.8465466            | -0.754907061                                        | 0.040559555 |          | 0.185629488 |       |        |
| Z95115.1               | 22                                                  | 26512537    | 26514568 | +           |       | 2032   |
| antisense              | uncharacterized LOC100507599 [Source:NCBI           |             |          |             |       |        |
| gene;Acc:100507599]    | -                                                   | 86          | 109      | 70          | 157   | 95     |
| 186                    | 2.072542434                                         | 2.541728948 |          | 2.143291211 |       |        |
| 4.293267931            | 2.873738603                                         | 4.256182667 |          |             |       |        |
| ENSG00000184588        | 226.8127415                                         | 153.1041615 |          | 253.4231797 |       |        |
| 171.9707702            | 113.007691                                          | 103.5166854 |          | 211.1133609 |       |        |
| 129.4983822            | 0.704466425                                         | 0.04059309  |          | 0.18573491  |       | PDE4B  |
| 1                      | 65792514                                            | 66374579    |          | +           | 8644  |        |
| protein_coding         | phosphodiesterase 4B [Source:HGNC                   |             |          |             |       |        |
| Symbol;Acc:HGNC:8781]  | -                                                   | 250         | 173      | 218         | 166   | 99     |
| 120                    | 1.416295692                                         | 0.94832628  |          | 1.569092628 |       |        |
| 1.067100623            | 0.703992118                                         | 0.645501872 |          |             |       |        |
| ENSG00000123094        | 1089.60841                                          | 779.6807299 |          | 1091.579659 |       |        |
| 1345.723075            | 1191.717469                                         | 1276.705787 |          | 986.9562664 |       |        |
| 1271.38211             | -0.36612683                                         | 0.040622196 |          | 0.185776466 |       | RASSF8 |
| 12                     | 25959029                                            | 26079892    |          | +           | 7619  |        |
| protein_coding         | Ras association domain family member 8 [Source:HGNC |             |          |             |       |        |
| Symbol;Acc:HGNC:13232] | -                                                   | 1201        | 881      | 939         | 1299  | 1044   |
| 1480                   | 7.71922531                                          | 5.479038797 |          | 7.667865127 |       |        |
| 9.473778382            | 8.422671938                                         | 9.032225255 |          |             |       |        |
| ENSG00000185122        | 2537.580952                                         | 2872.694267 |          | 2917.854041 |       |        |
| 2735.992795            | 3542.049143                                         | 4295.079806 |          | 2776.043087 |       |        |
| 3524.373915            | -0.344691266                                        | 0.040623177 |          | 0.185776466 |       | HSF1   |
| 8                      | 144291591                                           | 144314722   |          | +           | 5307  |        |
| protein_coding         | heat shock transcription factor 1 [Source:HGNC      |             |          |             |       |        |
| Symbol;Acc:HGNC:5224]  | HSF                                                 | 2797        | 3246     | 2510        | 2641  | 3103   |
| 4979                   | 25.80905257                                         | 28.98183427 |          | 29.42601693 |       |        |
| 27.6523062             | 35.94016347                                         | 43.62385657 |          |             |       |        |
| ENSG00000140526        | 3964.686721                                         | 3479.800942 |          | 4639.504175 |       |        |
| 3692.191716            | 2851.446587                                         | 3157.258906 |          | 4027.997279 |       |        |
| 3233.632403            | 0.316545325                                         | 0.040651549 |          | 0.185858166 |       | ABHD2  |
| 15                     | 89087459                                            | 89202360    |          | +           | 10345 |        |
| protein_coding         | abhydrolase domain containing 2 [Source:HGNC        |             |          |             |       |        |
| Symbol;Acc:HGNC:18717] | -                                                   | 4370        | 3932     | 3991        | 3564  | 2498   |
| 3660                   | 20.6861479                                          | 18.00982343 |          | 24.00258849 |       |        |

|                        |                                 |                  |                        |                    |          |             |
|------------------------|---------------------------------|------------------|------------------------|--------------------|----------|-------------|
| 19.14340749            | 14.84257661                     | 16.45059492      |                        |                    |          |             |
| ENSG00000128626        | 1075.092395                     | 1673.525835      | 1576.338677            |                    |          |             |
| 1530.125467            | 1948.526551                     | 2240.273601      | 1441.652302            |                    |          |             |
| 1906.308539            | -0.403552126                    | 0.040678494      | 0.185933303            | MRPS12             |          |             |
| 19                     | 38930548                        | 38933162         | + 2144                 |                    |          |             |
| protein_coding         | mitochondrial                   | ribosomal        | protein                | S12 [Source:HGNC   |          |             |
| Symbol;Acc:HGNC:10380] | -                               | 1185             | 1891                   | 1356               | 1477     | 1707        |
| 2597                   | 27.06588629                     | 41.79200321      | 39.34972985            |                    |          |             |
| 38.27963234            | 48.93911374                     | 56.32201537      |                        |                    |          |             |
| ENSG00000270885        | 4.53625483                      | 3.539980612      | 10.46242485            | 0                  |          |             |
| 0                      | 0                               | 6.17955343       | 0                      | 5.056412311        |          |             |
| 0.040685221            | 1                               | RASL10B          | 17                     | 35731649           | 35743521 |             |
| +                      | 3502                            | protein_coding   | RAS                    | like               | family   | 10 member B |
| [Source:HGNC           | Symbol;Acc:HGNC:30295]          | -                | 5                      | 4                  | 9        |             |
| 0                      | 0                               | 0                | 0.069916961            | 0.054121558        |          |             |
| 0.159894386            | 0                               | 0                | 0                      |                    |          |             |
| ENSG00000173452        | 3.629003864                     | 15.92991276      | 18.5998664             | 0                  |          |             |
| 3.424475485            | 0                               | 12.71959434      | 1.141491828            |                    |          |             |
| 3.542113271            | 0.040734911                     | 0.186143073      | TMEM196                | 7                  |          |             |
| 19719310               | 19773598                        | -                | 4087                   | protein_coding     |          |             |
| transmembrane          | protein                         | 196 [Source:HGNC | Symbol;Acc:HGNC:22431] | -                  |          |             |
| 4                      | 18                              | 16               | 0                      | 3                  | 0        | 0.047927418 |
| 0.208686477            | 0.2435691                       | 0                | 0.045119469            | 0                  |          |             |
| ENSG00000183778        | 180.5429422                     | 163.7241033      | 126.7115898            |                    |          |             |
| 133.6399358            | 78.76293614                     | 38.81875704      | 156.9928785            |                    |          |             |
| 83.74054301            | 0.911257037                     | 0.040795921      | 0.186373719            |                    |          |             |
| B3GALT5                | 21                              | 39556442         | 39673137               | +                  | 14319    |             |
| protein_coding         | "beta-1,3-galactosyltransferase | 5 [Source:HGNC   |                        |                    |          |             |
| Symbol;Acc:HGNC:920]"  | -                               | 199              | 185                    | 109                | 129      | 69          |
| 45                     | 0.680564154                     | 0.612188941      | 0.473609773            |                    |          |             |
| 0.500597948            | 0.296199119                     | 0.146127126      |                        |                    |          |             |
| ENSG00000278396        | 3.629003864                     | 4.424975766      | 10.46242485            | 0                  |          |             |
| 0                      | 0                               | 6.172134826      | 0                      | 5.05473927         |          |             |
| 0.040820046            | 1                               | AL122023.1       | 14                     | 93334528           |          |             |
| 93335057               | +                               | 530              | sense_intronic         | "novel transcript, |          |             |
| sense intronic         | UNC79"                          | -                | 4                      | 5                  | 9        | 0           |
| 0                      | 0.369583697                     | 0.447013434      | 1.056509694            | 0                  |          |             |
| 0                      | 0                               |                  |                        |                    |          |             |
| ENSG00000130052        | 845.5579003                     | 702.6861516      | 790.4943219            |                    |          |             |
| 510.732468             | 660.9237685                     | 616.7869174      | 779.5794579            |                    |          |             |
| 596.147718             | 0.387051338                     | 0.040824985      | 0.186458341            | STARD8             |          |             |
| X                      | 68647666                        | 68725842         | +                      | 5558               |          |             |
| protein_coding         | StAR related                    | lipid transfer   | domain                 | containing         | 8        |             |
| [Source:HGNC           | Symbol;Acc:HGNC:19161]          | -                | 932                    | 794                | 680      |             |
| 493                    | 579                             | 715              | 8.211567241            | 6.769060579        |          |             |
| 7.611972609            | 4.928791201                     | 6.403352078      | 5.981615837            |                    |          |             |
| ENSG00000143493        | 1904.319778                     | 1772.645292      | 1628.650801            |                    |          |             |
| 2231.476138            | 2285.26664                      | 1984.932443      | 1768.538624            |                    |          |             |
| 2167.225074            | -0.292613858                    | 0.040854674      | 0.186545772            | INTS7              |          |             |
| 1                      | 211940399                       | 212035542        | -                      | 5311               |          |             |



|                        |                                                            |                |                      |                     |                |             |      |
|------------------------|------------------------------------------------------------|----------------|----------------------|---------------------|----------------|-------------|------|
| protein_coding         | integrator complex subunit 7                               | [Source:HGNC   |                      |                     |                |             |      |
| Symbol;Acc:HGNC:24484] | -                                                          | 2099           | 2003                 | 1401                | 2154           | 2002        |      |
| 2301                   | 19.35373636                                                | 17.87026895    | 16.41227104          |                     |                |             |      |
| 22.53623907            | 23.1704854                                                 | 20.1451885     |                      |                     |                |             |      |
| ENSG00000124299        | 1296.46163                                                 | 1214.21335     | 1740.25              | 1020.428967         |                |             |      |
|                        | 1204.273879                                                | 1070.535055    | 1416.974993          | 1098.412634         |                |             |      |
|                        | 0.366765385                                                | 0.040890402    | 0.186660726          | PEPD                | 19             |             |      |
|                        | 33386950                                                   | 33521794       | -                    | 4157                | protein_coding |             |      |
|                        | peptidase D [Source:HGNC Symbol;Acc:HGNC:8840]             |                |                      |                     |                | -           | 1429 |
|                        | 1372                                                       | 1497           | 985                  | 1055                | 1241           | 16.83375057 |      |
| 15.63869565            | 22.40518955                                                | 13.16643652    | 15.59982747          |                     |                |             |      |
| 13.88106459            |                                                            |                |                      |                     |                |             |      |
| ENSG00000264049        | 1.814501932                                                | 0              | 0                    | 10.35968495         |                |             |      |
| 13.69790194            | 5.175834272                                                | 0.604833977    |                      |                     |                |             |      |
| 9.74447372             | -3.958608066                                               | 0.040958844    | 0.186899937          |                     |                |             |      |
| MIR4737                | 17                                                         | 60043025       | 60043105             | -                   | 81             | miRNA       |      |
|                        | microRNA 4737 [Source:HGNC Symbol;Acc:HGNC:41669]          |                |                      |                     |                | -           |      |
|                        | 2                                                          | 0              | 0                    | 10                  | 12             | 6           |      |
|                        | 0                                                          | 0              | 6.860045951          | 9.106334255         | 3.444270481    |             |      |
| ENSG00000105808        | 0                                                          | 0              | 0                    | 10.35968495         | 0              |             |      |
| 11.21430759            | 0                                                          | 7.191330846    | -5.325465368         | 0.04096128          |                |             |      |
|                        | 1                                                          | RASA4          | 7                    | 102573807           | 102616757      | -           |      |
|                        | 8077                                                       | protein_coding | RAS p21 protein      | activator 4         |                |             |      |
|                        | [Source:HGNC Symbol;Acc:HGNC:23181]                        |                |                      |                     |                | -           | 0    |
|                        | 10                                                         | 0              | 13                   | 0                   | 0              | 0.068795806 |      |
|                        | 0                                                          | 0.074838364    |                      |                     |                |             |      |
| ENSG00000162391        | 11.79426256                                                | 15.0449176     | 10.46242485          |                     |                |             |      |
| 22.79130689            | 53.65011592                                                | 33.64292277    | 12.43386834          |                     |                |             |      |
| 36.69478186            | -1.555319971                                               | 0.040963936    | 0.186899937          |                     |                |             |      |
| FAM151A                | 1                                                          | 54609182       | 54623556             | -                   | 2005           |             |      |
| protein_coding         | family with sequence similarity                            |                |                      | 151 member A        |                |             |      |
|                        | [Source:HGNC Symbol;Acc:HGNC:25032]                        |                |                      |                     |                | -           | 13   |
|                        | 22                                                         | 47             | 39                   | 0.317510183         | 0.401754718    |             |      |
| 0.279276877            | 0.60970583                                                 | 1.440890046    | 0.904443097          |                     |                |             |      |
| ENSG00000226803        | 17.23776835                                                | 11.50493699    | 19.76235805          |                     |                |             |      |
| 40.4027713             | 52.5086241                                                 | 34.50556181    | 16.16835446          |                     |                |             |      |
| 42.47231907            | -1.39655033                                                | 0.040990305    | 0.186972021          |                     |                |             |      |
| ZNF451-AS1             | 6                                                          | 57114894       | 57174236             | -                   | 4918           |             |      |
|                        | antisense ZNF451 regulatory antisense RNA 1 [Source:HGNC   |                |                      |                     |                |             |      |
|                        | Symbol;Acc:HGNC:53824]                                     |                |                      |                     |                | -           | 19   |
|                        | 40                                                         | 0.189188076    | 0.125251019          | 0.215063765         | 39             | 46          |      |
| 0.440644269            | 0.574932246                                                | 0.37818342     |                      |                     |                |             |      |
| ENSG00000228286        | 0                                                          | 0              | 0                    | 0                   | 26.7418104     |             |      |
|                        | 0                                                          | 8.913936801    | -5.637208252         | 0.041019927         |                |             |      |
| 0.187058905            | AP000593.2                                                 | 11             | 72249856             | 72251288            |                |             |      |
|                        | -                                                          | 1433           | processed_pseudogene | "docking protein 1, |                |             |      |
|                        | 62kDa (downstream of tyrosine kinase 1) (DOK1) pseudogene" |                |                      |                     |                | -           |      |
|                        | 0                                                          | 0              | 0                    | 0                   | 31             | 0           |      |
|                        | 0                                                          | 0              | 0                    | 1.005880807         |                |             |      |
| ENSG00000133103        | 786.5865875                                                | 569.9368786    | 814.9066466          |                     |                |             |      |

|                                                               |                                                      |                    |                |                |
|---------------------------------------------------------------|------------------------------------------------------|--------------------|----------------|----------------|
| 526.2719954                                                   | 577.5948651                                          | 526.2098176        | 723.8100376    |                |
| 543.3588927                                                   | 0.413230424                                          | 0.041139937        | 0.187557821    | COG6           |
| 13                                                            | 39655627                                             | 39791665           | + 8051         |                |
| protein_coding                                                | component of oligomeric golgi complex 6 [Source:HGNC |                    |                |                |
| Symbol;Acc:HGNC:18621]                                        | -                                                    | 867 644            | 701 508        | 506            |
| 610                                                           | 5.273487906                                          | 3.790203092        | 5.417202097    |                |
| 3.506113163                                                   | 3.863207632                                          | 3.522986885        |                |                |
| ENSG00000166333                                               | 70.76557535                                          | 86.72952501        | 112.76169      |                |
| 10.35968495                                                   | 74.19696883                                          | 27.60444945        | 90.0855968     |                |
| 37.38703441                                                   | 1.274138158                                          | 0.041163759        | 0.187618071    | ILK            |
| 11                                                            | 6603708 6610874                                      | + 3484             | protein_coding |                |
| integrin linked kinase                                        | [Source:HGNC Symbol;Acc:HGNC:6040]                   |                    |                | -              |
| 78                                                            | 98 97                                                | 10 65              | 32             | 1.096339698    |
| 1.332828805                                                   | 1.732209574                                          | 0.159490161        | 1.146786497    |                |
| 0.427073722                                                   |                                                      |                    |                |                |
| ENSG00000207725                                               | 2.721752898                                          | 2.654985459        | 0              | 5.179842475    |
| 15.98088559                                                   | 21.56597613                                          | 1.792246119        | 14.24223473    |                |
| -2.954069393                                                  | 0.041201995                                          | 0.187743972        | MIR222         | X              |
| 45747015                                                      | 45747124                                             | -                  | 110            | miRNA          |
| microRNA 222                                                  | [Source:HGNC Symbol;Acc:HGNC:31602]                  |                    |                | - 3            |
| 3                                                             | 0 5                                                  | 14 25              | 1.335541086    |                |
| 1.292275202                                                   | 0                                                    | 2.525744191        | 7.823168973    | 10.56764807    |
| ENSG00000157445                                               | 19.95952125                                          | 20.35488852        | 62.77454909    |                |
| 17.61146441                                                   | 0 0                                                  | 34.36298629        | 5.870488138    |                |
| 2.55140434                                                    | 0.041223778                                          | 0.187794854        | CACNA2D3       | 3              |
| 54122547                                                      | 55074557                                             | +                  | 4670           | protein_coding |
| calcium voltage-gated channel auxiliary subunit alpha2delta 3 |                                                      |                    |                |                |
| [Source:HGNC Symbol;Acc:HGNC:15460]                           | -                                                    | 22                 | 23             | 54             |
| 17                                                            | 0 0                                                  | 0.230693036        | 0.2333659      |                |
| 0.719422019                                                   | 0.202275873                                          | 0 0                |                |                |
| ENSG00000108255                                               | 8.165258694                                          | 0                  | 13.9498998     | 0 0            |
| 0                                                             | 7.371719498                                          | 0                  | 5.310936604    | 0.041257436    |
| 1                                                             | CRYBA1 17                                            | 29246863           | 29254494       | +              |
| 794                                                           | protein_coding                                       | crystallin beta A1 | [Source:HGNC   |                |
| Symbol;Acc:HGNC:2394]                                         | -                                                    | 9 0                | 12 0           | 0 0            |
| 0                                                             | 0.555073751                                          | 0                  | 0.940302499    | 0 0            |
| 0                                                             |                                                      |                    |                |                |
| ENSG00000185000                                               | 476.3067571                                          | 726.5810207        | 568.4584168    |                |
| 722.0700409                                                   | 732.8377537                                          | 937.6886422        | 590.4487315    |                |
| 797.5321456                                                   | -0.434095141                                         | 0.04128155         | 0.187974977    | DGAT1          |
| 8                                                             | 144314584                                            | 144326910          | - 4131         |                |
| protein_coding                                                | diacylglycerol 0-acyltransferase 1 [Source:HGNC      |                    |                |                |
| Symbol;Acc:HGNC:2843]                                         | -                                                    | 525 821            | 489 697        | 642            |
| 1087                                                          | 6.223472746                                          | 9.417039736        | 7.364792423    |                |
| 9.375396133                                                   | 9.552723189                                          | 12.23503926        |                |                |
| ENSG00000115419                                               | 4849.256413                                          | 3694.854764        | 3765.310454    |                |
| 3643.501197                                                   | 3482.691568                                          | 2612.071029        | 4103.140544    |                |
| 3246.087931                                                   | 0.338447814                                          | 0.041291405        | 0.187974977    | GLS            |
| 2                                                             | 190880827                                            | 190965552          | + 9827         |                |
| protein_coding                                                | glutaminase [Source:HGNC Symbol;Acc:HGNC:4331]       |                    |                | -              |

|                                 |                                                                |             |             |             |             |                |             |
|---------------------------------|----------------------------------------------------------------|-------------|-------------|-------------|-------------|----------------|-------------|
|                                 | 5345                                                           | 4175        | 3239        | 3517        | 3051        | 3028           | 26.63516779 |
|                                 | 20.13084313                                                    |             | 20.50675008 |             | 19.88673359 |                | 19.08396502 |
|                                 | 14.32735206                                                    |             |             |             |             |                |             |
| ENSG00000102606                 | 1854.420974                                                    |             | 1624.851101 |             | 1677.475451 |                |             |
| 2300.886027                     | 1929.12119                                                     |             | 2096.21288  |             | 1718.915842 |                |             |
| 2108.740032                     | -0.294911808                                                   |             | 0.041295198 |             | 0.187974977 |                |             |
| ARHGEF7 13                      | 111114559                                                      |             | 111305737   |             | +           | 11768          |             |
| protein_coding                  | Rho guanine nucleotide exchange factor 7 [Source:HGNC          |             |             |             |             |                |             |
| Symbol;Acc:HGNC:15607]          | -                                                              |             | 2044        | 1836        | 1443        | 2221           | 1690        |
|                                 | 2430                                                           | 8.505638394 | 7.392587234 |             | 7.629050997 |                |             |
| 10.48716117                     | 8.827371517                                                    |             | 9.601401525 |             |             |                |             |
| ENSG00000197852                 | 10.88701159                                                    |             | 52.21471403 |             | 26.73730795 |                |             |
| 6.215810969                     | 12.55641011                                                    |             | 0           | 29.94634452 |             | 6.257407026    |             |
|                                 | 2.282400654                                                    | 0.041310048 |             | 0.187994194 |             | INKA2 1        |             |
|                                 | 111680630                                                      | 111739424   |             | -           | 6290        | protein_coding |             |
|                                 | inka box actin regulator 2 [Source:HGNC Symbol;Acc:HGNC:28045] |             |             |             |             |                |             |
|                                 | -                                                              | 12          | 59          | 23          | 6           | 11             | 0           |
| 0.093424178                     | 0.444455011                                                    |             | 0.227501381 |             | 0.053004489 |                |             |
| 0.107495281                     | 0                                                              |             |             |             |             |                |             |
| ENSG00000131023                 | 1020.657337                                                    |             | 923.9349399 |             | 952.0806613 |                |             |
| 1459.679609                     | 1216.830289                                                    |             | 1035.166854 |             | 965.5576459 |                |             |
| 1237.225584                     | -0.357144106                                                   |             | 0.041339861 |             | 0.188081481 |                | LATS1       |
|                                 | 6                                                              | 149658153   | 149718256   |             | -           | 8643           |             |
| protein_coding                  | large tumor suppressor kinase 1 [Source:HGNC                   |             |             |             |             |                |             |
| Symbol;Acc:HGNC:6514]           | -                                                              |             | 1125        | 1044        | 819         | 1409           | 1066        |
|                                 | 1200                                                           | 6.37406801  | 5.723509744 |             | 5.895575907 |                |             |
| 9.05854662                      | 7.581236623                                                    |             | 6.455765567 |             |             |                |             |
| ENSG00000170310                 | 413.7064405                                                    |             | 557.5469465 |             | 619.6080494 |                |             |
| 693.0629231                     | 851.5529038                                                    |             | 619.3748345 |             | 530.2871454 |                |             |
| 721.3302205                     | -0.44412788                                                    |             | 0.041432014 |             | 0.188452274 |                | STX8        |
|                                 | 17                                                             | 9250471     | 9576591     | -           | 3779        | protein_coding |             |
| syntaxin 8 [Source:HGNC         | Symbol;Acc:HGNC:11443]                                         |             |             |             |             |                |             |
|                                 | -                                                              |             |             |             | 456         | 630            |             |
|                                 | 533                                                            | 669         | 746         | 718         | 5.909035979 | 7.899327112    |             |
|                                 | 8.775202834                                                    | 9.836968246 | 12.13414822 |             | 8.834430743 |                |             |
| ENSG00000097021                 | 3035.661732                                                    |             | 3460.331049 |             | 3768.797929 |                |             |
| 2657.259189                     | 2972.444721                                                    |             | 2815.653844 |             | 3421.596903 |                |             |
| 2815.119251                     | 0.281283224                                                    |             | 0.041461211 |             | 0.18851179  |                | ACOT7       |
|                                 | 1                                                              | 6264269     | 6394391     | -           | 4124        | protein_coding | acyl-       |
| CoA thioesterase 7 [Source:HGNC | Symbol;Acc:HGNC:24157]                                         |             |             |             |             |                |             |
|                                 | -                                                              |             |             |             |             |                | 3346        |
|                                 | 3910                                                           | 3242        | 2565        | 2604        | 3264        | 39.73159168    |             |
| 44.92463338                     | 48.91039841                                                    |             | 34.56055885 |             | 38.81232716 |                |             |
| 36.80124503                     |                                                                |             |             |             |             |                |             |
| ENSG00000188130                 | 506.246039                                                     |             | 586.7517865 |             | 497.5464262 |                |             |
| 302.5028005                     | 420.0689928                                                    |             | 437.357996  |             | 530.1814172 |                |             |
| 386.6432631                     | 0.45546601                                                     |             | 0.041475916 |             | 0.18851179  |                | MAPK12      |
|                                 | 22                                                             | 50245450    | 50261825    |             | -           | 9424           |             |
| protein_coding                  | mitogen-activated protein kinase 12 [Source:HGNC               |             |             |             |             |                |             |
| Symbol;Acc:HGNC:6874]           | -                                                              |             | 558         | 663         | 428         | 292            | 368         |
|                                 | 507                                                            | 2.89952999  | 3.333532486 |             | 2.825630295 |                |             |
| 1.721708477                     | 2.400268919                                                    |             | 2.50151839  |             |             |                |             |

|                                 |                                                 |             |             |                |      |
|---------------------------------|-------------------------------------------------|-------------|-------------|----------------|------|
| ENSG00000139826                 | 607.8581472                                     | 643.3914763 | 528.9337007 |                |      |
| 757.2929698                     | 759.0920657                                     | 776.3751407 | 593.3944414 |                |      |
| 764.2533921                     | -0.364126897                                    | 0.04147707  | 0.18851179  | ABHD13         |      |
| 13                              | 108218379                                       | 108234255   | + 5338      |                |      |
| protein_coding                  | abhydrolase domain containing 13 [Source:HGNC   |             |             |                |      |
| Symbol;Acc:HGNC:20293]          | -                                               | 670 727     | 455 731     | 665            |      |
| 900                             | 6.146457978                                     | 6.453306349 | 5.303220366 |                |      |
| 7.609407658                     | 7.657560488                                     | 7.839619024 |             |                |      |
| ENSG00000144233                 | 671.3657148                                     | 850.4803421 | 759.1070474 |                |      |
| 875.3933782                     | 1132.359894                                     | 946.3150327 | 760.3177015 |                |      |
| 984.6894348                     | -0.372526731                                    | 0.041499284 | 0.188564305 |                |      |
| AMMECR1L                        | 2                                               | 127861630   | 127885922   | -              | 4761 |
| protein_coding                  | AMMECR1 like [Source:HGNC                       |             |             |                |      |
| Symbol;Acc:HGNC:28658]          | -                                               | 740 961     | 653 845     | 992            |      |
| 1097                            | 7.611359268                                     | 9.564266019 | 8.533394948 |                |      |
| 9.862126551                     | 12.80739638                                     | 10.71369958 |             |                |      |
| ENSG00000172250                 | 8.165258694                                     | 19.46989337 | 8.137441549 |                |      |
| 1.035968495                     | 0                                               | 2.587917136 | 11.92419787 | 1.207961877    |      |
| 3.253205763                     | 0.041527392                                     | 0.188642538 | SERHL       | 22             |      |
| 42500579                        | 42512560                                        | + 1742      |             |                |      |
| transcribed_unitary_pseudogene  | serine hydrolase-like (pseudogene)              |             |             |                |      |
| [Source:HGNC                    | Symbol;Acc:HGNC:14408]                          | -           | 9 22        | 7              |      |
| 1                               | 0                                               | 3           | 0.253001469 | 0.598412933    |      |
| 0.250009629                     | 0.031898032                                     | 0           | 0.080076323 |                |      |
| ENSG00000110497                 | 878.2189351                                     | 970.839683  | 1118.316967 |                |      |
| 1079.479172                     | 1127.793926                                     | 1762.371569 | 989.1251951 |                |      |
| 1323.214889                     | -0.421219296                                    | 0.041537831 | 0.188642538 | AMBRA1         |      |
| 11                              | 46396414                                        | 46594125    | - 7673      |                |      |
| protein_coding                  | autophagy and beclin 1 regulator 1 [Source:HGNC |             |             |                |      |
| Symbol;Acc:HGNC:25990]          | -                                               | 968 1097    | 962 1042    | 988            |      |
| 2043                            | 6.177871101                                     | 6.774353732 | 7.800397249 |                |      |
| 7.545961141                     | 7.914784719                                     | 12.38038603 |             |                |      |
| ENSG00000214026                 | 712.1920083                                     | 626.5765684 | 790.4943219 |                |      |
| 880.5732207                     | 1451.977605                                     | 681.4848458 | 709.7542995 |                |      |
| 1004.678557                     | -0.500695766                                    | 0.041570771 | 0.188719628 | MRPL23         |      |
| 11                              | 1947278                                         | 1984522     | + 2975      | protein_coding |      |
| mitochondrial ribosomal protein | L23 [Source:HGNC                                |             |             |                |      |
| Symbol;Acc:HGNC:10322]          | -                                               | 785 708     | 680 850     | 1272           |      |
| 790                             | 12.92145354                                     | 11.27645857 | 14.22095589 |                |      |
| 15.87610634                     | 26.2813398                                      | 12.34727552 |             |                |      |
| ENSG00000103496                 | 589.7131279                                     | 978.8046394 | 697.4949899 |                |      |
| 837.0625439                     | 1063.870384                                     | 1180.952853 | 755.3375857 |                |      |
| 1027.29526                      | -0.44348018                                     | 0.041576143 | 0.188719628 | STX4           |      |
| 16                              | 31032889                                        | 31042975    | + 4078      |                |      |
| protein_coding                  | syntaxin 4 [Source:HGNC                         |             |             |                |      |
| Symbol;Acc:HGNC:11439]          | -                                               | 650 808     | 932 1369    | 7.805393794    |      |
| 650                             | 1106                                            | 600         | 808         | 932            | 1369 |
| 12.85092374                     | 9.153999314                                     | 11.00971769 | 14.04805022 |                |      |
| 15.6094372                      |                                                 |             |             |                |      |
| ENSG00000126003                 | 714.9137612                                     | 570.8218738 | 623.0955243 |                |      |
| 789.4079931                     | 826.4400836                                     | 839.3477911 | 636.2770531 |                |      |

|                                     |                                               |                       |                |                 |
|-------------------------------------|-----------------------------------------------|-----------------------|----------------|-----------------|
| 818.3986226                         | -0.363141403                                  | 0.041589105           | 0.188730035    | PLAGL2          |
| 20                                  | 32192503                                      | 32207791              | - 5705         |                 |
| protein_coding                      | PLAG1 like zinc                               | finger 2 [Source:HGNC |                |                 |
| Symbol;Acc:HGNC:9047]               | zf-C2H2                                       | 788 645               | 536 762        | 724             |
| 973                                 | 6.763932303                                   | 5.357109293           | 5.845423585    |                 |
| 7.421836217                         | 7.800640754                                   | 7.930274305           |                |                 |
| ENSG00000151743                     | 87.09609273                                   | 130.0942875           | 116.249165     |                 |
| 168.8628647                         | 164.3748233                                   | 199.2696195           | 111.1465151    |                 |
| 177.5024358                         | -0.676800664                                  | 0.041640219           | 0.188913527    | AMN1            |
| 12                                  | 31671137                                      | 31729174              | - 3195         |                 |
| protein_coding                      | antagonist of mitotic exit network 1 homolog  |                       |                |                 |
| [Source:HGNC Symbol;Acc:HGNC:27281] |                                               | -                     | 96 147         | 100             |
| 163                                 | 144 231                                       | 1.471394248           | 2.180082421    |                 |
| 1.947313991                         | 2.834841524                                   | 2.770377745           | 3.361802033    |                 |
| ENSG00000272442                     | 9.979760626                                   | 6.194966072           | 2.3249833      | 0               |
| 0                                   | 0                                             | 6.166569999           | 0              | 5.061036244     |
| 0.041663272                         | 1                                             | AL353588.1            | 6              | 44273194        |
| 44378957                            | +                                             | 3513                  | protein_coding | "novel protein, |
| TMEM151B-SPATS1                     | readthrough"                                  | -                     | 11             | 7 2 0           |
| 0                                   | 0                                             | 0.153335678           | 0.09441616     | 0.035420827     |
| 0                                   | 0                                             | 0                     |                |                 |
| ENSG00000063660                     | 403.7266799                                   | 500.9072567           | 628.9079826    |                 |
| 400.9198075                         | 410.9370581                                   | 251.0279622           | 511.1806397    |                 |
| 354.2949426                         | 0.529599618                                   | 0.041704595           | 0.18915023     | GPC1            |
| 2                                   | 240435671                                     | 240468078             | + 6516         |                 |
| protein_coding                      | glypican 1 [Source:HGNC Symbol;Acc:HGNC:4449] |                       |                | -               |
| 445                                 | 566 541                                       | 387 360               | 291            | 3.344318405     |
| 4.115871396                         | 5.165626913                                   | 3.300212714           | 3.396008631    |                 |
| 2.076552576                         |                                               |                       |                |                 |
| ENSG00000009307                     | 21785.81745                                   | 18519.40857           | 21719.99399    |                 |
| 19619.17136                         | 16616.69654                                   | 14805.47393           | 20675.07334    |                 |
| 17013.78061                         | 0.281203998                                   | 0.041713779           | 0.18915023     | CSDE1           |
| 1                                   | 114716913                                     | 114758676             | - 5778         |                 |
| protein_coding                      | cold shock domain containing E1 [Source:HGNC  |                       |                |                 |
| Symbol;Acc:HGNC:29905]              | CSD                                           | 24013 20926           | 18684 18938    | 14557           |
| 17163                               | 203.5155355                                   | 171.6070495           | 201.186654     |                 |
| 182.1246031                         | 154.8608735                                   | 138.1168558           |                |                 |
| ENSG00000105655                     | 35.38278767                                   | 24.77986429           | 29.06229125    |                 |
| 70.44585765                         | 117.5736583                                   | 26.7418104            | 29.74164774    |                 |
| 71.58710879                         | -1.262653802                                  | 0.04173027            | 0.189176509    | ISYNA1          |
| 19                                  | 18434388                                      | 18438301              | - 3284         |                 |
| protein_coding                      | inositol-3-phosphate synthase 1 [Source:HGNC  |                       |                |                 |
| Symbol;Acc:HGNC:29821]              |                                               | -                     | 39 28          | 25 68           |
| 31                                  | 0.581554127                                   | 0.403999961           | 0.473634912    | 103             |
| 1.150582616                         | 1.927886386                                   | 0.438924238           |                |                 |
| ENSG00000078018                     | 44.45529733                                   | 89.38451047           | 110.4367067    |                 |
| 43.51067679                         | 44.5181813                                    | 5.175834272           | 81.42550485    |                 |
| 31.06823079                         | 1.396988432                                   | 0.041758442           | 0.189239434    | MAP2            |
| 2                                   | 209424058                                     | 209734118             | + 11559        |                 |
| protein_coding                      | microtubule associated protein 2 [Source:HGNC |                       |                |                 |

|                                      |                                                       |             |             |             |      |           |
|--------------------------------------|-------------------------------------------------------|-------------|-------------|-------------|------|-----------|
| Symbol;Acc:HGNC:6839]                | -                                                     | 49          | 101         | 95          | 42   | 39        |
| 6                                    | 0.207589078                                           | 0.414025939 | 0.511340496 |             |      |           |
| 0.201902209                          | 0.207391859                                           | 0.024135817 |             |             |      |           |
| ENSG00000143162                      | 1555.028156                                           | 1617.77114  | 1550.763861 |             |      |           |
| 1502.154318                          | 1200.849403                                           | 977.3700383 | 1574.521052 |             |      |           |
| 1226.791253                          | 0.360656417                                           | 0.041765546 | 0.189239434 |             |      | CREG1     |
| 1                                    | 167529117                                             | 167553805   | -           |             | 3286 |           |
| protein_coding                       | cellular repressor of E1A stimulated genes 1          |             |             |             |      |           |
| [Source:HGNC Symbol;Acc:HGNC:2351]   | -                                                     | 1714        | 1828        |             |      | 1334      |
| 1450                                 | 1052                                                  | 1133        | 25.54300227 | 26.35937285 |      |           |
| 25.25777657                          | 24.51954951                                           | 19.67866085 | 16.03220911 |             |      |           |
| ENSG00000239672                      | 1724.684086                                           | 2087.703566 | 2152.934536 |             |      |           |
| 1465.89542                           | 1706.530283                                           | 1636.426269 | 1988.440729 |             |      |           |
| 1602.950657                          | 0.310674922                                           | 0.041792212 | 0.189311764 |             |      | NME1      |
| 17                                   | 51153536                                              | 51162428    | +           |             | 3438 |           |
| protein_coding                       | NME/NM23 nucleoside diphosphate kinase 1 [Source:HGNC |             |             |             |      |           |
| Symbol;Acc:HGNC:7849]                | -                                                     | 1901        | 2359        | 1852        | 1415 | 1495      |
| 1897                                 | 27.07727328                                           | 32.51236107 | 33.5152109  |             |      |           |
| 22.86981288                          | 26.72899812                                           | 25.65620852 |             |             |      |           |
| ENSG00000124635                      | 14.51601546                                           | 25.66485944 | 53.4746159  |             |      |           |
| 13.46759043                          | 6.848950969                                           | 0           | 31.21849693 | 6.772180468 |      |           |
| 2.215148905                          | 0.04180947                                            | 0.189341455 |             |             |      | HIST1H2BJ |
| 6                                    | 27125897                                              | 27132750    | -           |             | 950  |           |
| protein_coding                       | histone cluster 1 H2B family member j [Source:HGNC    |             |             |             |      |           |
| Symbol;Acc:HGNC:4761]                | -                                                     | 16          | 29          | 46          | 13   | 6         |
| 0                                    | 0.824755197                                           | 1.446441366 | 3.012597234 |             |      |           |
| 0.760381935                          | 0.388217408                                           | 0           |             |             |      |           |
| ENSG00000196678                      | 592.4348808                                           | 429.2226493 | 368.509853  |             |      |           |
| 352.2292883                          | 248.8452185                                           | 364.0336771 | 463.3891277 |             |      |           |
| 321.702728                           | 0.526160561                                           | 0.041834927 | 0.189341578 |             |      | ERI2      |
| 16                                   | 20780193                                              | 20900349    | -           |             | 6761 |           |
| protein_coding                       | ERI1 exoribonuclease family member 2 [Source:HGNC     |             |             |             |      |           |
| Symbol;Acc:HGNC:30541]               | -                                                     | 653         | 485         | 317         | 340  | 218       |
| 422                                  | 4.729670967                                           | 3.399047577 | 2.917125898 |             |      |           |
| 2.794345001                          | 1.981951021                                           | 2.902234719 |             |             |      |           |
| ENSG00000149547                      | 3540.093269                                           | 3352.36164  | 3227.07682  |             |      |           |
| 3720.162865                          | 4092.248204                                           | 4315.783144 | 3373.177243 |             |      |           |
| 4042.731404                          | -0.261196671                                          | 0.041838152 | 0.189341578 |             |      | EI24      |
| 11                                   | 125569216                                             | 125584687   | +           |             | 3558 |           |
| protein_coding                       | "EI24, autophagy associated transmembrane protein     |             |             |             |      |           |
| [Source:HGNC Symbol;Acc:HGNC:13276]" | -                                                     | 3902        | 3788        |             |      | 2776      |
| 3591                                 | 3585                                                  | 5003        | 53.70441681 | 50.44643348 |      |           |
| 48.54230164                          | 56.08174328                                           | 61.93420631 | 65.38160496 |             |      |           |
| ENSG00000259956                      | 2230.022874                                           | 2504.536283 | 2627.231129 |             |      |           |
| 2697.661961                          | 2900.530735                                           | 3468.671601 | 2453.930095 |             |      |           |
| 3022.288099                          | -0.301066651                                          | 0.041841609 | 0.189341578 |             |      | RBM15B    |
| 3                                    | 51391268                                              | 51397908    | +           |             | 6641 |           |
| protein_coding                       | RNA binding motif protein 15B [Source:HGNC            |             |             |             |      |           |
| Symbol;Acc:HGNC:24303]               | -                                                     | 2458        | 2830        | 2260        | 2604 | 2541      |
| 4021                                 | 18.12496105                                           | 20.19200272 | 21.17297114 |             |      |           |

|                                      |                                              |             |             |             |                |      |      |
|--------------------------------------|----------------------------------------------|-------------|-------------|-------------|----------------|------|------|
| 21.7881092                           | 23.51898337                                  | 28.15344928 |             |             |                |      |      |
| ENSG00000107140                      | 287.5985562                                  | 407.0977704 | 420.8219773 |             |                |      |      |
| 397.811902                           | 586.7267997                                  | 591.7703851 | 371.8394346 |             |                |      |      |
| 525.4363623                          | -0.499966284                                 | 0.041934252 | 0.189712271 | TESK1       |                |      |      |
| 9                                    | 35605305                                     | 35610041    | +           | 3298        |                |      |      |
| protein_coding                       | testis associated actin remodelling kinase 1 |             |             |             |                |      |      |
| [Source:HGNC Symbol;Acc:HGNC:11731]  | -                                            |             | 317         | 460         | 362            |      |      |
| 384                                  | 514                                          | 686         | 4.706925175 | 6.608967576 |                |      |      |
| 6.829120341                          | 6.469826236                                  | 9.579874681 | 9.671737092 |             |                |      |      |
| ENSG00000101955                      | 1450.694295                                  | 1547.856523 | 1935.548597 |             |                |      |      |
| 1442.068145                          | 1351.526325                                  | 1032.578937 | 1644.699805 |             |                |      |      |
| 1275.391136                          | 0.366935182                                  | 0.042025019 | 0.190063747 | SRPX        |                |      |      |
| X                                    | 38149336                                     | 38220924    | -           | 1987        |                |      |      |
| protein_coding                       | sushi repeat containing protein X-linked     |             |             |             |                |      |      |
| [Source:HGNC Symbol;Acc:HGNC:11309]  | -                                            | 1599        | 1749        | 1665        | 1392           | 1184 |      |
| 1197                                 | 39.40753593                                  | 41.70790572 | 52.13426046 |             |                |      |      |
| 38.927222                            | 36.6269871                                   | 28.01091537 |             |             |                |      |      |
| ENSG00000284976                      | 363.8076374                                  | 507.1022227 | 378.9722779 |             |                |      |      |
| 225.8411319                          | 232.8643329                                  | 386.4622923 | 416.6273793 |             |                |      |      |
| 281.7225857                          | 0.562534724                                  | 0.042033432 | 0.190063747 |             |                |      |      |
| BX255925.3                           | 9                                            | 137217452   | 137219361   | +           |                | 1910 |      |
| protein_coding                       | novel RING finger protein                    |             |             | -           |                | 401  |      |
| 573                                  | 326                                          | 218         | 204         | 448         | 10.2811025     |      |      |
| 14.21502722                          | 10.61918237                                  | 6.34213044  | 6.565142549 |             |                |      |      |
| 10.90625543                          |                                              |             |             |             |                |      |      |
| ENSG00000268758                      | 2.721752898                                  | 12.38993214 | 3.48747495  | 0           |                |      |      |
| 0                                    | 0                                            | 6.199719997 | 0           | 5.068182265 |                |      |      |
| 0.042146948                          | 1                                            | ADGRE4P 19  | 6952500     | 6997872     | -              | 3321 |      |
| transcribed_unprocessed_pseudogene   | "adhesion G protein-                         |             |             |             |                |      |      |
| coupled receptor E4, pseudogene      | [Source:HGNC Symbol;Acc:HGNC:19240]"         |             |             |             |                |      |      |
| -                                    | 3                                            | 14          | 3           | 0           | 0              | 0    |      |
| 0.044236531                          | 0.199749454                                  | 0.056202965 | 0           | 0           | 0              |      |      |
| ENSG00000008130                      | 1572.265924                                  | 1385.017415 | 1499.614228 |             |                |      |      |
| 1340.543232                          | 1172.312108                                  | 1048.969079 | 1485.632522 |             |                |      |      |
| 1187.274806                          | 0.323772042                                  | 0.042163594 | 0.190470401 | NADK        |                |      |      |
| 1                                    | 1751232                                      | 1780457     | -           | 5570        | protein_coding | NAD  |      |
| kinase                               | [Source:HGNC Symbol;Acc:HGNC:29831]          |             |             |             | -              | 1733 | 1565 |
| 1290                                 | 1294                                         | 1027        | 1216        | 15.23603814 | 13.31329599    |      |      |
| 14.40924951                          | 12.90895613                                  | 11.33346241 | 10.15101333 |             |                |      |      |
| ENSG00000103202                      | 2288.994187                                  | 2691.270261 | 2700.468103 |             |                |      |      |
| 2134.095099                          | 2074.090652                                  | 2123.817329 | 2560.244184 |             |                |      |      |
| 2110.667694                          | 0.278354761                                  | 0.042164041 | 0.190470401 | NME4        |                |      |      |
| 16                                   | 396725                                       | 410367      | +           | 3670        | protein_coding | NME/ |      |
| NM23 nucleoside diphosphate kinase 4 | [Source:HGNC                                 |             |             |             |                |      |      |
| Symbol;Acc:HGNC:7852]                | -                                            | 2523        | 3041        | 2323        | 2060           | 1817 |      |
| 2462                                 | 33.66509697                                  | 39.26239579 | 39.3812949  |             |                |      |      |
| 31.1898438                           | 30.43240138                                  | 31.19270245 |             |             |                |      |      |
| ENSG00000120265                      | 1207.551036                                  | 1354.927579 | 1449.627087 |             |                |      |      |
| 1076.371266                          | 1118.661992                                  | 1029.99102  | 1337.368568 |             |                |      |      |
| 1075.008093                          | 0.314906676                                  | 0.042168463 | 0.190470401 | PCMT1       |                |      |      |

|                                      |                                                        |             |                              |             |             |
|--------------------------------------|--------------------------------------------------------|-------------|------------------------------|-------------|-------------|
| 6                                    | 149749443                                              | 149811420   | +                            | 2832        |             |
| protein_coding                       | protein-L-isoaspartate (D-aspartate) 0-                |             |                              |             |             |
| methyltransferase                    | [Source:HGNC Symbol;Acc:HGNC:8728]                     |             |                              | -           | 1331        |
| 1531                                 | 1247                                                   | 1039        | 980                          | 1194        | 23.01513306 |
| 25.61582706                          | 27.39555172                                            | 20.38610901 | 21.27062186                  |             |             |
| 19.60388273                          |                                                        |             |                              |             |             |
| ENSG00000274565                      | 64.41481858                                            | 28.3198449  | 51.1496326                   |             |             |
| 22.79130689                          | 0                                                      | 17.25278091 | 47.96143203                  | 13.34802926 |             |
| 1.835790302                          | 0.042170113                                            | 0.190470401 | AC080038.1                   |             |             |
| 17                                   | 62626437                                               | 62627590    | -                            | 1154        |             |
| antisense                            | novel transcript                                       |             |                              | -           | 71          |
| 22                                   | 0                                                      | 20          | 3.012875761                  | 1.313925104 | 44          |
| 2.372213179                          | 1.059324253                                            | 0           | 0.805851846                  |             |             |
| ENSG00000114383                      | 807.4533597                                            | 960.2197411 | 694.007515                   |             |             |
| 910.616307                           | 1028.484137                                            | 1312.073988 | 820.5602053                  |             |             |
| 1083.724811                          | -0.401091764                                           | 0.042177204 | 0.190470401                  | TUSC2       |             |
| 3                                    | 50320027                                               | 50328251    | -                            | 2406        |             |
| protein_coding                       | "tumor suppressor 2, mitochondrial calcium regulator   |             |                              |             |             |
| [Source:HGNC Symbol;Acc:HGNC:17034]" |                                                        |             |                              | -           | 890         |
| 879                                  | 901                                                    | 1521        | 18.11436303                  | 21.3678367  | 597         |
| 15.43780514                          | 20.30043274                                            | 23.01847396 | 29.39440064                  |             |             |
| ENSG00000177169                      | 1302.812387                                            | 1335.457686 | 2056.447729                  |             |             |
| 1045.292211                          | 1277.329356                                            | 1236.161752 | 1564.905934                  |             |             |
| 1186.261106                          | 0.398738799                                            | 0.042210011 | 0.190533774                  | ULK1        |             |
| 12                                   | 131894651                                              | 131923167   | +                            | 7608        |             |
| protein_coding                       | unc-51 like autophagy activating kinase 1 [Source:HGNC |             |                              |             |             |
| Symbol;Acc:HGNC:12558]               |                                                        |             |                              | -           | 1436        |
| 1433                                 | 9.242992902                                            | 9.398210686 | 14.46652346                  | 1769        | 1009        |
| 7.369409773                          | 9.040801684                                            | 8.758035568 |                              |             | 1119        |
| ENSG00000131781                      | 27.21752898                                            | 21.23988367 | 12.78740815                  |             |             |
| 56.97826722                          | 27.39580388                                            | 72.4616798  | 20.41494027                  |             |             |
| 52.27858363                          | -1.353468373                                           | 0.04221278  | 0.190533774                  | FM05        |             |
| 1                                    | 147175351                                              | 147243050   | -                            | 5986        |             |
| protein_coding                       | flavin containing monooxygenase 5 [Source:HGNC         |             |                              |             |             |
| Symbol;Acc:HGNC:3773]                |                                                        |             |                              | -           | 30          |
| 84                                   | 0.24542185                                             | 0.189976976 | 0.114330689                  | 11          | 55          |
| 0.510549694                          | 0.246446066                                            | 0.652489597 |                              |             | 24          |
| ENSG00000233846                      | 0.907250966                                            | 8.849951531 | 9.299933199                  |             | 0           |
| 0                                    | 0                                                      | 6.352378565 | 0                            | 5.098087564 |             |
| 0.04221471                           | 1                                                      | SELENOTP1   | 9                            | 6278667     | 6279153     |
| 487                                  | processed_pseudogene                                   |             | selenoprotein T pseudogene 1 | +           |             |
| [Source:HGNC Symbol;Acc:HGNC:53722]  |                                                        |             |                              | -           | 1           |
| 0                                    | 0                                                      | 0           | 0.100554086                  | 0.972965586 | 8           |
| 1.022039951                          | 0                                                      | 0           | 0                            |             |             |
| ENSG00000001084                      | 857.3521629                                            | 898.2700804 | 820.7191048                  |             |             |
| 1020.428967                          | 1046.748006                                            | 1159.386877 | 858.7804494                  |             |             |
| 1075.521284                          | -0.324704184                                           | 0.042330472 | 0.191016256                  | GCLC        |             |
| 6                                    | 53497341                                               | 53616970    | -                            | 8646        |             |
| protein_coding                       | glutamate-cysteine ligase catalytic subunit            |             |                              |             |             |
| [Source:HGNC Symbol;Acc:HGNC:4311]   |                                                        |             |                              | -           | 945         |
|                                      |                                                        |             |                              | 1015        | 706         |



|                                            |                                                        |             |              |             |      |       |
|--------------------------------------------|--------------------------------------------------------|-------------|--------------|-------------|------|-------|
| 985                                        | 917                                                    | 1344        | 5.352359315  | 5.562592576 |      |       |
| 5.08038139                                 | 6.330427553                                            |             | 6.519307478  | 7.227948602 |      |       |
| ENSG00000107890                            | 704.0267496                                            |             | 436.3026105  | 480.1090514 |      |       |
| 367.7688157                                | 482.8510433                                            |             | 251.0279622  | 540.1461372 |      |       |
| 367.2159404                                | 0.559211559                                            |             | 0.042374314  | 0.191165326 |      |       |
| ANKRD26 10                                 | 26991914                                               |             | 27100498     | -           | 7941 |       |
| protein_coding                             | ankyrin repeat domain 26 [Source:HGNC                  |             |              |             |      |       |
| Symbol;Acc:HGNC:29186]                     | -                                                      | 776         | 493          | 413         | 355  | 423   |
| 291                                        | 4.785366542                                            |             | 2.941698534  | 3.235800235 |      |       |
| 2.484077841                                | 3.274255243                                            |             | 1.703918472  |             |      |       |
| ENSG00000274211                            | 942.6337537                                            |             | 824.8154827  | 857.9188376 |      |       |
| 957.2348893                                | 1261.34847                                             |             | 1128.331871  | 875.1226913 |      |       |
| 1115.63841                                 | -0.34998119                                            |             | 0.042385239  | 0.191165859 |      | 50CS7 |
| 17                                         | 38352228                                               |             | 38405593     | +           | 8621 |       |
| protein_coding                             | suppressor of cytokine signaling 7 [Source:HGNC        |             |              |             |      |       |
| Symbol;Acc:HGNC:29846]                     | -                                                      | 1039        | 932          | 738         | 924  | 1105  |
| 1308                                       | 5.90182851                                             |             | 5.12253233   | 5.326053975 |      |       |
| 5.955611636                                | 7.878653361                                            |             | 7.054741696  |             |      |       |
| ENSG00000084453                            | 0                                                      | 0           | 0            | 5.179842475 | 0    |       |
| 16.39014186                                | 0                                                      | 7.189994778 | -5.327193225 | 0.042435397 |      |       |
| 1                                          | SLC01A2 12                                             |             | 21264600     | 21419594    |      | -     |
| 11520                                      | protein_coding solute carrier organic anion            |             |              |             |      |       |
| transporter family member 1A2 [Source:HGNC | Symbol;Acc:HGNC:10956]                                 |             |              |             |      |       |
| -                                          | 0                                                      | 0           | 0            | 5           | 0    | 19    |
| 0                                          | 0                                                      | 0.024117349 | 0            | 0.076688835 |      |       |
| ENSG00000135378                            | 302.1145717                                            |             | 274.3484975  | 211.5734803 |      |       |
| 310.7905485                                | 438.332862                                             |             | 381.286458   | 262.6788498 |      |       |
| 376.8032895                                | -0.518167682                                           |             | 0.042465176  | 0.191477567 |      | PRRG4 |
| 11                                         | 32829943                                               |             | 32858123     | +           | 5530 |       |
| protein_coding                             | proline rich and Gla domain 4 [Source:HGNC             |             |              |             |      |       |
| Symbol;Acc:HGNC:30799]                     | -                                                      | 333         | 310          | 182         | 300  | 384   |
| 442                                        | 2.948816757                                            |             | 2.656213645  | 2.047637636 |      |       |
| 3.014450572                                | 4.268285423                                            |             | 3.716448818  |             |      |       |
| ENSG00000172183                            | 58.97131279                                            |             | 118.5893505  | 149.9614228 |      |       |
| 196.834014                                 | 160.9503478                                            |             | 200.9948975  | 109.1740287 |      |       |
| 186.2597531                                | -0.775210969                                           |             | 0.042498764  | 0.191580181 |      | ISG20 |
| 15                                         | 88636153                                               |             | 88656483     | +           | 7363 |       |
| protein_coding                             | interferon stimulated exonuclease gene 20 [Source:HGNC |             |              |             |      |       |
| Symbol;Acc:HGNC:6130]                      | -                                                      | 65          | 134          | 129         | 190  | 141   |
| 233                                        | 0.432301995                                            |             | 0.862335845  | 1.090038297 |      |       |
| 1.433873519                                | 1.177095427                                            |             | 1.471404699  |             |      |       |
| ENSG00000280670                            | 74.39457921                                            |             | 55.75469465  | 56.96209084 |      |       |
| 39.36680281                                | 21.68834474                                            |             | 1.725278091  | 62.3704549  |      |       |
| 20.92680854                                | 1.584249242                                            |             | 0.042535328  | 0.191696156 |      |       |
| CCDC163 1                                  | 45493866                                               |             | 45500079     | -           | 2757 |       |
| protein_coding                             | coiled-coil domain containing 163 [Source:HGNC         |             |              |             |      |       |
| Symbol;Acc:HGNC:27003]                     | -                                                      | 82          | 63           | 49          | 38   | 19    |
| 2                                          | 1.456484173                                            |             | 1.082755065  | 1.105773456 |      |       |
| 0.76587673                                 | 0.423608041                                            |             | 0.033730614  |             |      |       |
| ENSG00000158887                            | 17.23776835                                            |             | 33.62981582  | 4.6499666   |      | 0     |

|                                                 |                                                                                         |                 |                               |                |               |      |
|-------------------------------------------------|-----------------------------------------------------------------------------------------|-----------------|-------------------------------|----------------|---------------|------|
|                                                 | 6.848950969                                                                             | 0               | 18.50585026                   | 2.282983656    |               |      |
| 3.068265929                                     | 0.042548915                                                                             |                 | 0.191708546                   | MPZ            | 1             |      |
| 161304735                                       | 161309972                                                                               | -               | 2154                          | protein_coding | myelin        |      |
| protein zero [Source:HGNC Symbol;Acc:HGNC:7225] | -                                                                                       | 19              | 38                            |                |               |      |
| 4                                               | 0                                                                                       | 6               | 0                             | 0.43195309     | 0.835919273   |      |
|                                                 | 0.115537014                                                                             | 0               | 0.171219377                   | 0              |               |      |
| ENSG00000251768                                 | 0                                                                                       | 0               | 0                             | 0              | 13.69790194   |      |
| 7.763751407                                     | 0                                                                                       | 7.153884449     | -5.313170154                  | 0.042571272    |               |      |
| 1                                               | RNA5SP217                                                                               | 6               | 127317883                     | 127317973      |               |      |
| -                                               | 91                                                                                      | rRNA_pseudogene | "RNA, 5S ribosomal pseudogene |                |               |      |
| 217 [Source:HGNC Symbol;Acc:HGNC:43117]"        | -                                                                                       | 0               | 0                             |                |               |      |
| 0                                               | 0                                                                                       | 12              | 9                             | 0              | 0             | 0    |
|                                                 | 8.105638183                                                                             | 4.59866883      |                               |                |               |      |
| ENSG00000138356                                 | 1475.190071                                                                             | 1110.668917     | 984.6304275                   |                |               |      |
| 2076.080864                                     | 1283.036815                                                                             | 1435.431371     | 1190.163138                   |                |               |      |
| 1598.183017                                     | -0.42476191                                                                             | 0.042581943     | 0.191808504                   | A0X1           |               |      |
| 2                                               | 200585868                                                                               | 200677064       | +                             | 5556           |               |      |
| protein_coding                                  | aldehyde oxidase 1 [Source:HGNC Symbol;Acc:HGNC:553]                                    |                 |                               |                |               |      |
| -                                               | 1626                                                                                    | 1255            | 847                           | 2004           | 1124          | 1664 |
| 14.33134621                                     | 10.70305925                                                                             | 9.484796555     | 20.0422984                    |                |               |      |
| 12.43516163                                     | 13.92586251                                                                             |                 |                               |                |               |      |
| ENSG00000173599                                 | 951.7062633                                                                             | 974.3796636     | 888.1436205                   |                |               |      |
| 792.5158986                                     | 793.3368206                                                                             | 590.907746      | 938.0765158                   |                |               |      |
| 725.5868217                                     | 0.372008677                                                                             | 0.042605889     | 0.191867507                   | PC             |               |      |
| 11                                              | 66848233                                                                                | 66958376        | -                             | 5927           |               |      |
| protein_coding                                  | pyruvate carboxylase [Source:HGNC Symbol;Acc:HGNC:8636]                                 | -               | 1049                          | 1101           | 764           | 765  |
| 685                                             | 8.667008939                                                                             | 8.80194869      | 8.019832133                   | 695            |               |      |
| 7.171971442                                     | 7.207708887                                                                             | 5.37386389      |                               |                |               |      |
| ENSG00000203950                                 | 1705.631816                                                                             | 1842.559909     | 1911.136272                   |                |               |      |
| 2117.519604                                     | 2292.115591                                                                             | 2196.279009     | 1819.775999                   |                |               |      |
| 2201.971401                                     | -0.27520427                                                                             | 0.042640268     | 0.191933387                   | RTL8A          |               |      |
| X                                               | 135050932                                                                               | 135052196       | -                             | 1265           |               |      |
| protein_coding                                  | retrotransposon Gag like 8A [Source:HGNC Symbol;Acc:HGNC:24514]                         | -               | 1880                          | 2082           | 1644          | 2044 |
| 2546                                            | 72.77731137                                                                             | 77.98599912     | 80.85709503                   | 2008           |               |      |
| 89.78471524                                     | 97.57095217                                                                             | 93.58341559     |                               |                |               |      |
| ENSG00000158636                                 | 614.208904                                                                              | 569.9368786     | 642.8578824                   |                |               |      |
| 514.876342                                      | 444.0403212                                                                             | 433.0448007     | 609.0012217                   |                |               |      |
| 463.9871546                                     | 0.392173536                                                                             | 0.042642219     | 0.191933387                   | EMSY           |               |      |
| 11                                              | 76444923                                                                                | 76553025        | +                             | 11783          |               |      |
| protein_coding                                  | "EMSY, BRCA2 interacting transcriptional repressor [Source:HGNC Symbol;Acc:HGNC:18071]" | -               | 677                           | 644            | 553           |      |
| 497                                             | 389                                                                                     | 502             | 2.813594294                   | 2.589741585    |               |      |
| 2.919954608                                     | 2.343756852                                                                             | 2.029275835     | 1.980974374                   |                |               |      |
| ENSG00000253508                                 | 17.23776835                                                                             | 22.12487883     | 15.11239145                   |                |               |      |
| 7.251779464                                     | 0                                                                                       | 0               | 18.15834621                   | 2.417259821    |               |      |
| 2.919374778                                     | 0.042714971                                                                             | 0.192211934     | AC004080.2                    | 7              |               |      |
|                                                 | 27186573                                                                                | 27193448        | -                             | 556            | lincRNA novel |      |
| transcript                                      | -                                                                                       | 19              | 25                            | 13             | 7             | 0    |

|                                     |                                               |             |             |             |             |
|-------------------------------------|-----------------------------------------------|-------------|-------------|-------------|-------------|
|                                     | 1.673429778                                   | 2.130549643 | 1.454706594 | 0.699576628 |             |
|                                     | 0                                             | 0           |             |             |             |
| ENSG00000149091                     | 3550.980281                                   | 3515.200748 | 3701.373413 |             |             |
| 2450.06549                          | 3006.689475                                   | 3318.572407 | 3589.184814 |             |             |
| 2925.109124                         | 0.294871867                                   | 0.042759228 | 0.192310241 |             | DGKZ        |
| 11                                  | 46332905                                      | 46380554    | +           | 10787       |             |
| protein_coding                      | diacylglycerol kinase zeta [Source:HGNC       |             |             |             |             |
| Symbol;Acc:HGNC:2857]               | -                                             | 3914        | 3972        | 3184        | 2365        |
| 3847                                | 17.76842061                                   | 17.44757211 | 18.36450501 |             | 2634        |
| 12.18267083                         | 15.0093696                                    | 16.58259621 |             |             |             |
| ENSG00000115687                     | 498.9880313                                   | 426.5676638 | 374.3223113 |             |             |
| 291.1071471                         | 349.2964994                                   | 304.511583  | 433.2926688 |             |             |
| 314.9717432                         | 0.461835564                                   | 0.042766296 | 0.192310241 |             | PASK        |
| 2                                   | 241106099                                     | 241150264   | -           | 10686       |             |
| protein_coding                      | PAS domain containing serine/threonine kinase |             |             |             |             |
| [Source:HGNC Symbol;Acc:HGNC:17270] | -                                             |             | 550         | 482         | 322         |
| 281                                 | 306                                           | 353         | 2.520439071 | 2.137264682 |             |
| 1.874768071                         | 1.461178232                                   | 1.760165956 | 1.535997659 |             |             |
| ENSG00000236618                     | 29.03203091                                   | 17.69990306 | 24.41232465 |             |             |
| 2.07193699                          | 0                                             | 11.21430759 | 23.71475287 | 4.428748193 |             |
| 2.384528589                         | 0.042784097                                   | 0.192310241 |             | PITPNA-AS1  |             |
| 17                                  | 1516931                                       | 1518096     | +           | 542         | antisense   |
| antisense RNA 1                     | [Source:HGNC Symbol;Acc:HGNC:44116]           |             |             |             |             |
| 20                                  | 21                                            | 2           | 0           | 13          | 2.891208256 |
| 1.748465832                         | 2.41060945                                    | 0.205041964 | 0           | 1.115257324 |             |
| ENSG00000270231                     | 662.2932052                                   | 526.5721161 | 441.746827  |             |             |
| 771.7965287                         | 675.7631623                                   | 728.0673542 | 543.5373827 |             |             |
| 725.2090151                         | -0.414831654                                  | 0.042792668 | 0.192310241 |             | NBPF8       |
| 1                                   | 120436353                                     | 120467739   | +           | 5330        |             |
| unprocessed_pseudogene              | NBPF member 8 [Source:HGNC                    |             |             |             |             |
| Symbol;Acc:HGNC:31990]              | -                                             | 730         | 595         | 380         | 745         |
| 844                                 | 6.706938664                                   | 5.289519196 | 4.435710912 |             | 592         |
| 7.766781856                         | 6.827187933                                   | 7.362855134 |             |             |             |
| ENSG00000179071                     | 99.79760626                                   | 92.03949592 | 89.51185704 |             |             |
| 26.93518087                         | 51.36713227                                   | 64.6979284  | 93.78298641 |             |             |
| 47.66674718                         | 0.973485647                                   | 0.042797626 | 0.192310241 |             | CCDC89      |
| 11                                  | 85684866                                      | 85686277    | -           | 1412        |             |
| protein_coding                      | coiled-coil domain containing 89 [Source:HGNC |             |             |             |             |
| Symbol;Acc:HGNC:26762]              | -                                             | 110         | 104         | 77          | 26          |
| 75                                  | 3.814930865                                   | 3.489997239 | 3.392836058 |             | 45          |
| 1.023176825                         | 1.958958236                                   | 2.469776107 |             |             |             |
| ENSG00000114841                     | 171.4704326                                   | 217.7088077 | 109.2742151 |             |             |
| 174.0427071                         | 207.7515127                                   | 483.0778654 | 166.1511518 |             |             |
| 288.2906951                         | -0.794839816                                  | 0.042802047 | 0.192310241 |             | DNAH1       |
| 3                                   | 52316319                                      | 52400491    | +           | 13872       |             |
| protein_coding                      | dynein axonemal heavy chain 1 [Source:HGNC    |             |             |             |             |
| Symbol;Acc:HGNC:2940]               | -                                             | 189         | 246         | 94          | 168         |
| 560                                 | 0.667192887                                   | 0.840276984 | 0.421595164 |             | 182         |
| 0.672949144                         | 0.806454126                                   | 1.877067823 |             |             |             |
| ENSG00000226367                     | 0.907250966                                   | 0           | 0           | 0           | 13.69790194 |

|                                                |                                                  |                                    |                |                 |             |
|------------------------------------------------|--------------------------------------------------|------------------------------------|----------------|-----------------|-------------|
|                                                | 12.93958568                                      | 0.302416989                        | 8.879162539    | -4.664874055    |             |
|                                                | 0.042871427                                      | 0.192573051                        | ST7-AS2 7      | 117072072       |             |
|                                                | 117146480                                        | -                                  | 2866 antisense | ST7 antisense   |             |
| RNA 2 [Source:HGNC Symbol;Acc:HGNC:16044]      |                                                  |                                    | -              | 1               | 0           |
|                                                | 0                                                | 0                                  | 12             | 15              | 0.017086476 |
|                                                | 0                                                | 0.257366739                        | 0.24335826     |                 |             |
| ENSG00000261366                                | 0                                                | 0                                  | 0              | 9.323716454     | 3.424475485 |
|                                                | 5.175834272                                      | 0                                  | 5.974675403    | -5.055150744    |             |
| 0.042925967                                    | 1                                                | MANEA-DT                           | 6              | 95575183        |             |
| 95577450                                       | -                                                | 2268 antisense                     |                | MANEA divergent |             |
| transcript [Source:HGNC Symbol;Acc:HGNC:43732] |                                                  |                                    | -              | 0               | 0           |
|                                                | 0                                                | 9                                  | 3              | 6               | 0           |
| 0.220501477                                    | 0.081306556                                      | 0.12300966                         |                |                 |             |
| ENSG00000100503                                | 1756.43787                                       | 1296.517899                        | 1245.028557    |                 |             |
| 1311.536115                                    | 1073.002318                                      | 879.8918262                        | 1432.661442    |                 |             |
| 1088.14342                                     | 0.397710352                                      | 0.043024697                        | 0.193212454    | NIN             |             |
|                                                | 14                                               | 50719763                           | 50831121       | -               | 13683       |
| protein_coding                                 | ninein [Source:HGNC Symbol;Acc:HGNC:14906]       |                                    |                |                 | -           |
|                                                | 1936                                             | 1465                               | 1071           | 1266            | 940         |
|                                                | 5.073208817                                      | 4.86984334                         | 5.141199094    | 1020            | 6.928715188 |
|                                                | 3.466170031                                      |                                    |                | 4.222735573     |             |
| ENSG00000100372                                | 709.4702554                                      | 823.9304876                        | 732.3697394    |                 |             |
| 910.616307                                     | 1090.124696                                      | 893.6940509                        | 755.2568275    |                 |             |
| 964.8116846                                    | -0.352391944                                     | 0.04312854                         | 0.193603137    |                 |             |
| SLC25A17                                       | 22                                               | 40769630                           | 40819399       | -               | 3989        |
|                                                | protein_coding                                   | solute carrier family 25 member 17 |                |                 |             |
| [Source:HGNC Symbol;Acc:HGNC:10987]            |                                                  |                                    | -              | 782             | 931         |
|                                                | 879                                              | 955                                | 1036           | 9.600003697     | 11.05890393 |
| 9.826149326                                    | 12.24438234                                      | 14.71589551                        | 12.07610102    |                 |             |
| ENSG00000133619                                | 175.0994364                                      | 215.0538222                        | 172.0487642    |                 |             |
| 191.6541716                                    | 309.3442854                                      | 358.8578428                        | 187.4006743    |                 |             |
| 286.6187666                                    | -0.613002304                                     | 0.043133584                        | 0.193603137    | KRBA1           |             |
|                                                | 7                                                | 149714781                          | 149734575      | +               | 5337        |
| protein_coding                                 | KRAB-A domain containing 1 [Source:HGNC          |                                    |                |                 |             |
| Symbol;Acc:HGNC:22228]                         |                                                  | -                                  | 193            | 243             | 148         |
|                                                | 416                                              | 1.7708786                          | 2.15742403     | 1.725326763     | 185         |
| 1.926134318                                    | 3.121184549                                      | 3.624325093                        |                |                 | 271         |
| ENSG00000197442                                | 421.8716992                                      | 238.9486913                        | 441.746827     |                 |             |
| 291.1071471                                    | 198.6195781                                      | 241.5389327                        | 367.5224058    |                 |             |
| 243.7552193                                    | 0.590559641                                      | 0.04317165                         | 0.193724841    | MAP3K5          |             |
|                                                | 6                                                | 136557047                          | 136792518      | -               | 5303        |
| protein_coding                                 | mitogen-activated protein kinase kinase kinase 5 |                                    |                |                 |             |
| [Source:HGNC Symbol;Acc:HGNC:6857]             |                                                  |                                    | -              | 465             | 270         |
|                                                | 281                                              | 174                                | 280            | 4.293979921     | 2.412506976 |
| 4.458295146                                    | 2.944399508                                      | 2.016856418                        | 2.455090028    |                 |             |
| ENSG00000173085                                | 457.2544869                                      | 446.0375572                        | 355.7224449    |                 |             |
| 351.1933198                                    | 220.3079228                                      | 312.2753344                        | 419.6714963    |                 |             |
| 294.5921923                                    | 0.510260832                                      | 0.043208692                        | 0.193841886    | COQ2            |             |
|                                                | 4                                                | 83261536                           | 83284914       | -               | 2774        |
| protein_coding                                 | "coenzyme Q2, polyprenyltransferase [Source:HGNC |                                    |                |                 |             |

|                                    |                                                    |                      |             |             |                |
|------------------------------------|----------------------------------------------------|----------------------|-------------|-------------|----------------|
| Symbol;Acc:HGNC:25223]" -          | 504                                                | 504                  | 306         | 339         | 193            |
| 362                                | 8.897187915                                        | 8.608956642          | 6.863123538 |             |                |
| 6.790555219                        | 4.276595873                                        | 6.067826187          |             |             |                |
| ENSG00000106992                    | 88.0033437                                         | 89.38451047          | 166.2363059 |             |                |
| 33.15099184                        | 97.02680539                                        | 7.763751407          | 114.5413867 |             |                |
| 45.98051621                        | 1.323835167                                        | 0.043234231          | 0.19390728  |             | AK1            |
| 9                                  | 127866480                                          | 127877743            | -           | 2667        |                |
| protein_coding                     | adenylate kinase 1 [Source:HGNC                    | Symbol;Acc:HGNC:361] |             |             |                |
| -                                  | 97                                                 | 101                  | 143         | 32          | 85             |
| 1.781055292                        | 1.794422883                                        | 3.335952578          | 0.666713127 | 9           |                |
| 1.95903985                         | 0.15690996                                         |                      |             |             |                |
| ENSG00000136014                    | 0                                                  | 0                    | 2.3249833   | 7.251779464 |                |
| 12.55641011                        | 10.35166854                                        | 0.774994433          |             |             |                |
| 10.05328604                        | -3.8085224                                         | 0.043256634          | 0.19395858  |             | USP44          |
| 12                                 | 95516560                                           | 95551490             | -           | 5386        |                |
| protein_coding                     | ubiquitin specific peptidase 44 [Source:HGNC       |                      |             |             |                |
| Symbol;Acc:HGNC:20064]             | -                                                  | 0                    | 0           | 2           | 7              |
| 12                                 | 0                                                  | 0                    | 0.023103113 | 0.072217714 | 11             |
| 0.125537564                        | 0.103596698                                        |                      |             |             |                |
| ENSG00000182944                    | 4105.310621                                        | 4707.289219          | 4537.20491  |             |                |
| 3570.983402                        | 3589.9918                                          | 3989.705584          | 4449.934917 |             |                |
| 3716.893595                        | 0.25947543                                         | 0.043333005          | 0.194251781 |             | EWSR1          |
| 22                                 | 29268009                                           | 29300525             | +           | 10326       |                |
| protein_coding                     | EWS RNA binding protein 1 [Source:HGNC             |                      |             |             |                |
| Symbol;Acc:HGNC:3508]              | -                                                  | 4525                 | 5319        | 3903        | 3447           |
| 4625                               | 21.45928                                           | 24.4075569           | 23.51653204 |             | 3145           |
| 18.54903012                        | 18.72129511                                        | 20.82622876          |             |             |                |
| ENSG00000104888                    | 17.23776835                                        | 2.654985459          | 13.9498998  |             |                |
| 21.75533839                        | 53.65011592                                        | 36.2308399           | 11.28088454 |             |                |
| 37.21209807                        | -1.726494174                                       | 0.043366462          | 0.194352508 |             |                |
| SLC17A7                            | 19                                                 | 49442360             | -           | 6013        |                |
| protein_coding                     | solute carrier family 17 member 7 [Source:HGNC     |                      |             |             |                |
| Symbol;Acc:HGNC:16704]             | -                                                  | 19                   | 3           | 12          | 21             |
| 42                                 | 0.154735898                                        | 0.023640491          | 0.124164341 |             | 47             |
| 0.194061835                        | 0.480456435                                        | 0.324779871          |             |             |                |
| ENSG00000222019                    | 23.58852512                                        | 27.43484975          | 9.299933199 |             |                |
| 6.215810969                        | 4.565967313                                        | 0                    | 20.10776935 | 3.593926094 |                |
|                                    | 2.510488334                                        | 0.043380419          | 0.194365815 | URAHP       | 16             |
|                                    | 90039761                                           | 90047773             | -           | 2340        |                |
| transcribed_unprocessed_pseudogene |                                                    | "urate (hydroxyiso-) |             |             |                |
| hydrolase, pseudogene [Source:HGNC | Symbol;Acc:HGNC:43695]"                            |                      |             |             | -              |
| 26                                 | 31                                                 | 8                    | 6           | 4           | 0              |
| 0.627729122                        | 0.212706605                                        | 0.142477877          | 0.105073088 |             |                |
| 0                                  |                                                    |                      |             |             |                |
| ENSG00000143797                    | 492.6372745                                        | 374.3529498          | 544.0460921 |             |                |
| 346.0134773                        | 400.6636317                                        | 233.7751813          | 470.3454388 |             |                |
| 326.8174301                        | 0.526484848                                        | 0.043395299          | 0.194383245 |             | MBOAT2         |
| 2                                  | 8852690                                            | 9003813              | -           | 8798        | protein_coding |
| membrane bound                     | 0-acyltransferase domain containing 2 [Source:HGNC |                      |             |             |                |
| Symbol;Acc:HGNC:25193]             | -                                                  | 543                  | 423         | 468         | 334            |
|                                    |                                                    |                      |             |             | 351            |

|                                     |                                                      |               |             |        |
|-------------------------------------|------------------------------------------------------|---------------|-------------|--------|
| 271                                 | 3.022348605                                          | 2.278152805   | 3.30954844  |        |
| 2.109475826                         | 2.452282613                                          | 1.432241823   |             |        |
| ENSG00000128709                     | 197.7807106                                          | 273.4635023   | 291.7854041 |        |
| 252.7763128                         | 385.8242379                                          | 514.132871    | 254.3432057 |        |
| 384.2444739                         | -0.597478305                                         | 0.043409725   | 0.194398637 | HOXD9  |
| 2                                   | 176122720                                            | 176124937     | + 1870      |        |
| protein_coding                      | homeobox D9 [Source:HGNC Symbol;Acc:HGNC:5140]       |               |             |        |
| Homeobox                            | 218 309                                              | 251 244       | 338 596     |        |
| 5.708783467                         | 7.829667397                                          | 8.351009189   | 7.25037156  |        |
| 11.11021476                         | 14.81957235                                          |               |             |        |
| ENSG00000171960                     | 585.1768731                                          | 780.5657251   | 710.2823981 |        |
| 457.8980747                         | 488.5585025                                          | 607.2978879   | 692.0083321 |        |
| 517.918155                          | 0.41689745                                           | 0.043437392   | 0.194473303 | PPIH   |
| 1                                   | 42658425                                             | 42676758      | + 1444      |        |
| protein_coding                      | peptidylprolyl isomerase H [Source:HGNC              |               |             |        |
| Symbol;Acc:HGNC:14651]              | -                                                    | 645 882       | 611 442     | 428    |
| 704                                 | 21.87364729                                          | 28.94195292   | 26.32575672 |        |
| 17.00854329                         | 18.21897484                                          | 22.66921514   |             |        |
| ENSG00000108883                     | 5887.151518                                          | 5635.649135   | 5944.982298 |        |
| 6204.415316                         | 7690.230446                                          | 6995.140018   | 5822.594317 |        |
| 6963.261927                         | -0.258083946                                         | 0.043458805   | 0.194519941 | EFTUD2 |
| 17                                  | 44849943                                             | 44899662      | - 10375     |        |
| protein_coding                      | elongation factor Tu GTP binding domain containing 2 |               |             |        |
| [Source:HGNC Symbol;Acc:HGNC:30858] | -                                                    | 6489          | 6368        | 5114   |
| 5989                                | 6737 8109                                            | 30.62797982   | 29.08314645 |        |
| 30.66757704                         | 32.07585572                                          | 39.91405047   | 36.34211624 |        |
| ENSG00000258860                     | 0 0                                                  | 0 13.46759043 | 7.990442797 |        |
| 0                                   | 0 7.152677744                                        | -5.311187532  | 0.043460607 |        |
| 1                                   | AL133163.2                                           | 14 35362232   | 35363628    |        |
| -                                   | 624 lincRNA novel transcript                         | -             | 0           |        |
| 0                                   | 0 13 7 0 0                                           | 0 0 0         | 0           |        |
| 1.157632754                         | 0.689542137                                          | 0             |             |        |
| ENSG00000175224                     | 1554.120905                                          | 1563.786436   | 1742.574983 |        |
| 1906.182031                         | 2106.052423                                          | 1908.157568   | 1620.160774 |        |
| 1973.464007                         | -0.284787287                                         | 0.043474491   | 0.194540925 | ATG13  |
| 11                                  | 46617527                                             | 46674818      | + 7001      |        |
| protein_coding                      | autophagy related 13 [Source:HGNC                    |               |             |        |
| Symbol;Acc:HGNC:29091]              | -                                                    | 1713 1767     | 1499 1840   | 1845   |
| 2212                                | 11.98190767                                          | 11.95922158   | 13.321355   |        |
| 14.60393156                         | 16.1988302                                           | 14.69115914   |             |        |
| ENSG00000153790                     | 136.9948959                                          | 115.0493699   | 126.7115898 |        |
| 79.76957411                         | 67.34801786                                          | 77.63751407   | 126.2519519 |        |
| 74.91836868                         | 0.751748908                                          | 0.043600791   | 0.195056752 |        |
| C7orf31 7                           | 25134697                                             | 25180356      | - 3837      |        |
| protein_coding                      | chromosome 7 open reading frame 31 [Source:HGNC      |               |             |        |
| Symbol;Acc:HGNC:21722]              | -                                                    | 151 130       | 109 77      | 59     |
| 90                                  | 1.927142511                                          | 1.605380539   | 1.767427245 |        |
| 1.115092692                         | 0.945164873                                          | 1.09064077    |             |        |
| ENSG00000269944                     | 0 0                                                  | 0 0           | 9.131934625 |        |
| 12.07694663                         | 0 7.069627086                                        | -5.298993348  | 0.043693859 |        |

|                                     |                                             |                |                  |              |      |
|-------------------------------------|---------------------------------------------|----------------|------------------|--------------|------|
| 1                                   | AP001267.4                                  | 11             | 118415977        | 118416521    |      |
| +                                   | 545                                         | sense_intronic | novel transcript | -            |      |
| 0                                   | 0                                           | 0              | 8                | 14           | 0    |
| 0                                   | 0                                           | 0.90227899     | 1.194435084      |              |      |
| ENSG00000146463                     | 2023.169654                                 | 1777.955263    | 1818.13694       |              |      |
| 1563.276459                         | 1542.15546                                  | 1515.656803    | 1873.087286      |              |      |
| 1540.362907                         | 0.282327413                                 | 0.043703467    | 0.195466657      | ZMYM4        |      |
| 1                                   | 35268967                                    | 35422058       | + 7647           |              |      |
| protein_coding                      | zinc finger MYM-type containing 4           |                |                  | [Source:HGNC |      |
| Symbol;Acc:HGNC:13055]              | -                                           | 2230 2009      | 1564 1509        | 1351         |      |
| 1757                                | 14.28046853                                 | 12.44845023    | 12.72484512      |              |      |
| 10.96503932                         | 10.85954474                                 | 10.68345412    |                  |              |      |
| ENSG00000268912                     | 150.6036604                                 | 147.7941906    | 109.2742151      |              |      |
| 198.905951                          | 220.3079228                                 | 204.4454537    | 135.8906887      |              |      |
| 207.8864425                         | -0.61032217                                 | 0.043730219    | 0.19549529       |              |      |
| AC012313.5                          | 19                                          | 58428632       | 58431148         | -            | 2517 |
| lincRNA                             | novel transcript                            | -              | 166 167          | 94           |      |
| 192                                 | 193 237                                     | 3.229635841    | 3.143834651      |              |      |
| 2.323547123                         | 4.238674399                                 | 4.713260608    | 4.378205564      |              |      |
| ENSG00000196912                     | 80.74533597                                 | 55.75469465    | 60.44956579      |              |      |
| 24.86324388                         | 39.95221399                                 | 27.60444945    | 65.64986547      |              |      |
| 30.80663577                         | 1.09560998                                  | 0.043731973    | 0.19549529       |              |      |
| ANKRD36B                            | 2                                           | 97492663       | 97589965         | -            | 6771 |
| protein_coding                      | ankyrin repeat domain 36B                   |                |                  | [Source:HGNC |      |
| Symbol;Acc:HGNC:29333]              | -                                           | 89 63          | 52 24            | 35           |      |
| 32                                  | 0.643673866                                 | 0.440873684    | 0.477812356      |              |      |
| 0.19695657                          | 0.317733196                                 | 0.219749645    |                  |              |      |
| ENSG00000166797                     | 951.7062633                                 | 964.6447169    | 1074.142285      |              |      |
| 825.6668904                         | 850.411412                                  | 665.957343     | 996.8310882      |              |      |
| 780.6785485                         | 0.353140595                                 | 0.043765147    | 0.195594158      | CIA02A       |      |
| 15                                  | 64072559                                    | 64094018       | - 2427           |              |      |
| protein_coding                      | cytosolic iron-sulfur assembly component 2A |                |                  |              |      |
| [Source:HGNC Symbol;Acc:HGNC:26235] | -                                           |                | 1049 1090        | 924          |      |
| 797                                 | 745 772                                     | 21.16578574    | 21.2805654       |              |      |
| 23.68694445                         | 18.24738304                                 | 18.86834709    | 14.79035309      |              |      |
| ENSG00000230091                     | 9.979760626                                 | 2.654985459    | 3.48747495       |              |      |
| 7.251779464                         | 42.23519764                                 | 23.29125422    | 5.374073678      |              |      |
| 24.25941044                         | -2.164751671                                | 0.04379746     | 0.195687639      |              |      |
| TMEM254-AS1                         | 10                                          | 80046860       | 80078912         | -            | 3138 |
| antisense                           | TMEM254 antisense RNA 1                     |                |                  | [Source:HGNC |      |
| Symbol;Acc:HGNC:27340]              | -                                           | 11 3           | 3 7              | 37           |      |
| 27                                  | 0.171659732                                 | 0.045299641    | 0.059480576      |              |      |
| 0.123953029                         | 0.724763219                                 | 0.400075395    |                  |              |      |
| ENSG00000178567                     | 651.4061936                                 | 650.4714375    | 501.0339011      |              |      |
| 803.911552                          | 808.1762143                                 | 734.9684666    | 600.9705107      |              |      |
| 782.3520777                         | -0.378809752                                | 0.043808498    | 0.195687639      |              |      |
| EPM2AIP1                            | 3                                           | 36985043       | 36993168         | -            | 8126 |
| protein_coding                      | EPM2A interacting protein 1                 |                |                  | [Source:HGNC |      |
| Symbol;Acc:HGNC:19735]              | -                                           | 718 735        | 431 776          | 708          |      |
| 852                                 | 4.326894536                                 | 4.285849948    | 3.299949538      |              |      |

|                                                               |                                                      |             |                      |                |      |             |
|---------------------------------------------------------------|------------------------------------------------------|-------------|----------------------|----------------|------|-------------|
| 5.306362888                                                   | 5.355546567                                          | 4.875215245 |                      |                |      |             |
| ENSG00000137822                                               | 688.6034832                                          | 592.9467526 | 659.1327655          |                |      |             |
| 612.2573805                                                   | 412.07855                                            | 401.9897951 | 646.8943338          |                |      |             |
| 475.4419085                                                   | 0.444491268                                          | 0.043819251 | 0.195687639          |                |      |             |
| TUBGCP4 15                                                    | 43369221                                             | 43409771    | +                    | 11171          |      |             |
| protein_coding                                                | tubulin gamma complex associated protein 4           |             |                      |                |      |             |
| [Source:HGNC Symbol;Acc:HGNC:16691]                           | -                                                    | 759         | 670                  | 567            |      |             |
| 591                                                           | 361                                                  | 466         | 3.327196172          | 2.841902615    |      |             |
| 3.157896222                                                   | 2.939730192                                          | 1.986380807 | 1.939656754          |                |      |             |
| ENSG00000184675                                               | 320.259591                                           | 356.6530467 | 299.9228457          |                |      |             |
| 421.6391774                                                   | 470.2946332                                          | 428.7316055 | 325.6118278          |                |      |             |
| 440.2218054                                                   | -0.433723333                                         | 0.043841375 | 0.195696763          | AMER1          |      |             |
| X                                                             | 64185117                                             | 64205744    | -                    | 8443           |      |             |
| protein_coding                                                | APC membrane recruitment protein 1 [Source:HGNC      |             |                      |                |      |             |
| Symbol;Acc:HGNC:26837]                                        | -                                                    | 353         | 403                  | 258            | 407  | 412         |
| 497                                                           | 2.047418389                                          | 2.261698436 | 1.90120857           |                |      |             |
| 2.678611096                                                   | 2.999492546                                          | 2.737099703 |                      |                |      |             |
| ENSG00000216867                                               | 3.629003864                                          | 6.194966072 | 8.137441549          | 0              |      |             |
| 0                                                             | 0                                                    | 5.987137162 | 0                    | 5.012891858    |      |             |
| 0.043842777                                                   | 1                                                    | RPL22P12    | 2                    | 110633947      |      |             |
| 110634333                                                     | +                                                    | 387         | processed_pseudogene | ribosomal      |      |             |
| protein L22 pseudogene 12 [Source:HGNC Symbol;Acc:HGNC:36345] | -                                                    |             |                      |                |      |             |
| 4                                                             | 7                                                    | 7           | 0                    | 0              | 0    | 0.506148215 |
| 0.857064518                                                   | 1.125366341                                          | 0           | 0                    | 0              |      |             |
| ENSG00000089050                                               | 801.102603                                           | 818.6205166 | 805.6067134          |                |      |             |
| 1026.644778                                                   | 962.2776112                                          | 1035.166854 | 808.4432777          |                |      |             |
| 1008.029748                                                   | -0.318533166                                         | 0.043855421 | 0.195696763          | RBBP9          |      |             |
| 20                                                            | 18486540                                             | 18497243    | -                    | 3861           |      |             |
| protein_coding                                                | "RB binding protein 9, serine hydrolase [Source:HGNC |             |                      |                |      |             |
| Symbol;Acc:HGNC:9892]"                                        | -                                                    | 883         | 925                  | 693            | 991  | 843         |
| 1200                                                          | 11.19926666                                          | 11.35189517 | 11.16709677          |                |      |             |
| 14.26217945                                                   | 13.42069891                                          | 14.45148454 |                      |                |      |             |
| ENSG00000154518                                               | 1395.351986                                          | 1820.43503  | 1971.585838          |                |      |             |
| 1344.687106                                                   | 1265.914437                                          | 1481.151241 | 1729.124285          |                |      |             |
| 1363.917595                                                   | 0.341436824                                          | 0.043857652 | 0.195696763          |                |      |             |
| ATP5MC3 2                                                     | 175176258                                            | 175184607   | -                    | 6780           |      |             |
| protein_coding                                                | ATP synthase membrane subunit c locus 3 [Source:HGNC |             |                      |                |      |             |
| Symbol;Acc:HGNC:843]                                          | -                                                    | 1538        | 2057                 | 1696           | 1298 | 1109        |
| 1717                                                          | 11.10849759                                          | 14.37576745 | 15.563347            |                |      |             |
| 10.63792789                                                   | 10.05423918                                          | 11.77529021 |                      |                |      |             |
| ENSG00000100867                                               | 29.93928188                                          | 42.47976735 | 34.8747495           |                |      |             |
| 5.179842475                                                   | 20.54685291                                          | 0           | 35.76459957          | 8.575565127    |      |             |
| 2.082968838                                                   | 0.043865547                                          | 0.195696763 | DHRS2                | 14             |      |             |
| 23630115                                                      | 23645639                                             | +           | 7556                 | protein_coding |      |             |
| dehydrogenase/reductase 2 [Source:HGNC Symbol;Acc:HGNC:18349] |                                                      |             |                      |                |      |             |
| -                                                             | 33                                                   | 48          | 30                   | 5              | 18   | 0           |
| 0.213870396                                                   | 0.3010064                                            | 0.247022295 | 0.036769701          |                |      |             |
| 0.146429276                                                   | 0                                                    |             |                      |                |      |             |
| ENSG00000280417                                               | 9.07250966                                           | 3.539980612 | 17.43737475          |                |      |             |
| 39.36680281                                                   | 30.82027936                                          | 27.60444945 | 10.01662167          |                |      |             |



|                        |                                     |                |                           |                               |             |
|------------------------|-------------------------------------|----------------|---------------------------|-------------------------------|-------------|
| 32.59717721            | -1.719260212                        | 0.043886616    | 0.195741389               |                               |             |
| AC096887.2             | 3                                   | 53046166       | 53048122                  | +                             | 1957        |
| TEC                    | TEC                                 | -              | 10                        | 4                             | 15          |
| 32                     | 0.250229125                         | 0.096849104    | 0.476877992               | 38                            | 27          |
| 1.078958684            | 0.848047735                         | 0.760309069    |                           |                               |             |
| ENSG00000219410        | 0                                   | 0              | 1.16249165                | 0                             | 9.131934625 |
| 17.25278091            | 0.387497217                         | 8.794905177    | -4.653761492              |                               |             |
| 0.043932295            | 0.195895733                         | AC125494.1     | 12                        |                               |             |
| 6663260                | 6672069                             | +              | 2399                      | bidirectional_promoter_lncRNA | novel       |
| transcript             | -                                   | 0              | 0                         | 1                             | 0           |
| 0                      | 0                                   | 0.025934424    | 0                         | 0.204977928                   | 8           |
| 0.387641947            |                                     |                |                           |                               | 20          |
| ENSG00000203837        | 0                                   | 0              | 0                         | 12.55641011                   |             |
| 8.626390453            | 0                                   | 7.060933521    | -5.294937245              | 0.043989088                   |             |
| 1                      | PNLIPRP3                            | 10             | 116427867                 | 116477957                     |             |
| +                      | 2354                                | protein_coding | pancreatic lipase related |                               |             |
| protein 3              | [Source:HGNC Symbol;Acc:HGNC:23492] | -              | 0                         | 0                             |             |
| 0                      | 0                                   | 11             | 10                        | 0                             | 0           |
| 0.287232506            | 0.197526132                         |                |                           |                               |             |
| ENSG00000151090        | 58.06406182                         | 62.83465587    | 62.77454909               |                               |             |
| 11.39565344            | 49.08414861                         | 6.038473317    | 61.22442226               |                               |             |
| 22.17275846            | 1.479030819                         | 0.043992925    | 0.196116646               | THR8                          |             |
| 3                      | 24117153                            | 24495756       | -                         | 10968                         |             |
| protein_coding         | thyroid hormone receptor beta       | [Source:HGNC   |                           |                               |             |
| Symbol;Acc:HGNC:11799] | THR-like                            | 64             | 71                        | 54                            | 11          |
| 43                     | 7                                   | 0.285746695    | 0.306730772               | 0.306318456                   |             |
| 0.055728491            | 0.240984092                         | 0.029675744    |                           |                               |             |
| ENSG00000250697        | 7.258007728                         | 2.654985459    | 8.137441549               | 0                             |             |
| 0                      | 0                                   | 6.016811579    | 0                         | 5.019786411                   |             |
| 0.044162201            | 1                                   | AC010343.3     | 5                         | 32925639                      |             |
| 33297910               | -                                   | 979            | lincRNA novel transcript  | -                             |             |
| 8                      | 3                                   | 7              | 0                         | 0                             | 0.400162123 |
| 0.145199461            | 0.444858809                         | 0              | 0                         | 0                             |             |
| ENSG00000092470        | 1204.829283                         | 1028.364368    | 1021.83016                |                               |             |
| 903.3645276            | 851.5529038                         | 839.3477911    | 1085.007937               |                               |             |
| 864.7550741            | 0.327761846                         | 0.044198247    | 0.19698231                | WDR76                         |             |
| 15                     | 43826963                            | 43868419       | +                         | 4078                          |             |
| protein_coding         | WD repeat domain 76                 | [Source:HGNC   |                           |                               |             |
| Symbol;Acc:HGNC:25773] | -                                   | 1328           | 1162                      | 879                           | 872         |
| 973                    | 15.94701994                         | 13.50160342    | 13.410609                 |                               | 746         |
| 11.88177454            | 11.24446938                         | 11.09421651    |                           |                               |             |
| ENSG00000159733        | 95.26135143                         | 145.1392051    | 91.83684034               |                               |             |
| 171.9707702            | 157.5258723                         | 207.8960099    | 110.745799                |                               |             |
| 179.1308841            | -0.692566541                        | 0.044223768    | 0.197030697               |                               |             |
| ZFYVE28                | 4                                   | 2269582        | 2418663                   | -                             | 9624        |
| finger FYVE-type       | containing 28                       | [Source:HGNC   | Symbol;Acc:HGNC:29334]    |                               |             |
| -                      | 105                                 | 164            | 79                        | 166                           | 138         |
| 0.534271943            | 0.807448207                         | 0.510714659    | 0.958439088               | 241                           |             |
| 0.881395507            | 1.164373858                         |                |                           |                               |             |
| ENSG00000079335        | 221.3692357                         | 178.7690209    | 187.1611556               |                               |             |

|                                            |                                                      |                                |                |              |
|--------------------------------------------|------------------------------------------------------|--------------------------------|----------------|--------------|
| 146.0715578                                | 140.4034949                                          | 74.18695789                    | 195.7664708    |              |
| 120.2206702                                | 0.707447905                                          | 0.044240391                    | 0.197030697    | CDC14A       |
| 1                                          | 100345001                                            | 100520278                      | + 6511         |              |
| protein_coding                             | cell division cycle 14A [Source:HGNC                 |                                |                |              |
| Symbol;Acc:HGNC:1718]                      | -                                                    | 244 202                        | 161 141        | 123          |
| 86                                         | 1.835146816                                          | 1.470043259                    | 1.538455814    |              |
| 1.203326445                                | 1.161193982                                          | 0.614160348                    |                |              |
| ENSG00000103415                            | 596.9711356                                          | 774.370759                     | 785.8443553    |              |
| 767.6526547                                | 942.8722501                                          | 1152.485764                    | 719.0620833    |              |
| 954.3368898                                | -0.409504217                                         | 0.04424252                     | 0.197030697    | HMOX2        |
| 16                                         | 4474690 4510347                                      | + 3793                         | protein_coding | heme         |
| oxygenase 2 [Source:HGNC                   | Symbol;Acc:HGNC:5014]                                | -                              | 658            | 875          |
| 676                                        | 741 826                                              | 1336                           | 8.495163356    | 10.93079253  |
| 11.08844636                                | 10.85543944                                          | 13.38580718                    | 16.37776494    |              |
| ENSG00000126882                            | 228.6272434                                          | 315.9432697                    | 241.7982632    |              |
| 137.7838098                                | 152.959905                                           | 223.4235127                    | 262.1229254    |              |
| 171.3890758                                | 0.610981302                                          | 0.04426034                     | 0.197060446    | FAM78A       |
| 9                                          | 131258076                                            | 131276547                      | - 5499         |              |
| protein_coding                             | family with sequence similarity 78 member A          |                                |                |              |
| [Source:HGNC                               | Symbol;Acc:HGNC:25465]                               | -                              | 252 357        | 208          |
| 133                                        | 134 259                                              | 2.244117046                    | 3.076174284    |              |
| 2.353349674                                | 1.343940262                                          | 1.497850397                    | 2.190014864    |              |
| ENSG00000130811                            | 4470.025509                                          | 6093.191629                    | 5361.411489    |              |
| 5176.734569                                | 7057.843974                                          | 7986.312281                    | 5308.209543    |              |
| 6740.296941                                | -0.344675217                                         | 0.044358076                    | 0.197445901    | EIF3G        |
| 19                                         | 10115017                                             | 10119918                       | - 3486         |              |
| protein_coding                             | eukaryotic translation initiation factor 3 subunit G |                                |                |              |
| [Source:HGNC                               | Symbol;Acc:HGNC:3274]                                | -                              | 4927 6885      | 4612         |
| 4997                                       | 6183 9258                                            | 69.21239267                    | 93.58430138    |              |
| 82.31306294                                | 79.65150944                                          | 109.023275                     | 123.4868783    |              |
| ENSG00000202523                            | 3.629003864                                          | 0 0                            | 23.82727538    |              |
| 23.97132839                                | 0                                                    | 1.209667955                    | 15.93286792    | -3.684982471 |
| 0.044403931                                | 0.197600284                                          | RF00019 9                      | 83992932       |              |
| 83993033                                   | + 102                                                | misc_RNA                       | -              |              |
| 4                                          | 0 0                                                  | 23 21                          | 0 1.920385876  |              |
| 0                                          | 0                                                    | 12.52967216                    | 12.65512628    | 0            |
| ENSG00000080293                            | 0 0                                                  | 0                              | 14.50355893    | 6.848950969  |
| 0                                          | 0                                                    | 7.117503299                    | -5.304355082   | 0.044418698  |
| 1                                          | SCTR 2                                               | 119439843                      | 119525301      | -            |
| 3426                                       | protein_coding                                       | secretin receptor [Source:HGNC |                |              |
| Symbol;Acc:HGNC:10608]                     | -                                                    | 0 0                            | 0 14           | 6            |
| 0                                          | 0 0                                                  | 0                              | 0.22706632     | 0.10764931   |
| 0                                          |                                                      |                                |                |              |
| ENSG00000127054                            | 2263.59116                                           | 2559.405983                    | 2344.745658    |              |
| 2406.554814                                | 3022.670361                                          | 3537.682725                    | 2389.2476      |              |
| 2988.9693                                  | -0.323289036                                         | 0.044429576                    | 0.197664679    | INTS11       |
| 1                                          | 1311585 1324691                                      | - 8220                         | protein_coding |              |
| integrator complex subunit 11 [Source:HGNC | Symbol;Acc:HGNC:26052]                               |                                |                |              |
| -                                          | 2495 2892                                            | 2017 2323                      | 2648 4101      |              |
| 14.86371659                                | 16.67066452                                          | 15.2665508                     | 15.70324606    |              |

|                                                      |                                        |                                     |             |                |        |  |
|------------------------------------------------------|----------------------------------------|-------------------------------------|-------------|----------------|--------|--|
| 19.80129178                                          | 23.19791591                            |                                     |             |                |        |  |
| ENSG00000173261                                      | 0.907250966                            | 1.769990306                         | 0           | 18.64743291    |        |  |
| 0                                                    | 18.11541995                            | 0.892413757                         |             |                |        |  |
| 12.25428429                                          | -3.736772088                           | 0.044491118                         | 0.197888708 |                |        |  |
| PLAC8L1 5                                            | 146084386                              | 146104369                           | -           | 656            |        |  |
| protein_coding                                       | PLAC8 like 1                           | [Source:HGNC Symbol;Acc:HGNC:31746] |             |                |        |  |
| -                                                    | 1 2                                    | 0 18                                | 0 21        |                |        |  |
| 0.074649146                                          | 0.144461659                            | 0                                   | 1.524687042 | 0              |        |  |
| 1.488491893                                          |                                        |                                     |             |                |        |  |
| ENSG00000068724                                      | 545.2578306                            | 494.7122906                         | 441.746827  |                |        |  |
| 364.6609102                                          | 408.6540745                            | 327.8028372                         | 493.9056494 |                |        |  |
| 367.039274                                           | 0.430296542                            | 0.044572574                         | 0.198201171 | TTC7A          |        |  |
| 2                                                    | 46916157                               | 47076137                            | +           | 6949           |        |  |
| protein_coding                                       | tetratricopeptide repeat domain 7A     | [Source:HGNC Symbol;Acc:HGNC:19750] |             |                |        |  |
| Symbol;Acc:HGNC:19750]                               | -                                      | 601 559                             | 380 352     | 358            |        |  |
| 380                                                  | 4.235267483                            | 3.811675644                         | 3.402264953 |                |        |  |
| 2.81470183                                           | 3.166708408                            | 2.54268349                          |             |                |        |  |
| ENSG00000069493                                      | 53.52780699                            | 36.28480128                         | 34.8747495  |                |        |  |
| 79.76957411                                          | 67.34801786                            | 98.34085116                         | 41.56245259 |                |        |  |
| 81.81948104                                          | -0.976612941                           | 0.044626972                         | 0.19839319  | CLEC2D         |        |  |
| 12                                                   | 9664969 9699555                        | +                                   | 6957        | protein_coding | C-type |  |
| lectin domain family 2 member D                      | [Source:HGNC Symbol;Acc:HGNC:14351]    |                                     |             |                |        |  |
| -                                                    | 59 41                                  | 30 77                               | 59 114      |                |        |  |
| 0.415296902                                          | 0.279246857                            | 0.268290996                         | 0.615008001 |                |        |  |
| 0.521287569                                          | 0.761927881                            |                                     |             |                |        |  |
| ENSG00000251000                                      | 0 3.539980612                          | 0                                   | 11.39565344 |                |        |  |
| 13.69790194                                          | 12.07694663                            | 1.179993537                         |             |                |        |  |
| 12.39016734                                          | -3.343771726                           | 0.044682663                         | 0.198590859 |                |        |  |
| AC008592.3                                           | 5 95834424                             | 95835046                            | -           | 418            |        |  |
| processed_pseudogene                                 | gamma-glutamyl cyclotransferase (GGCT) |                                     |             |                |        |  |
| pseudogene                                           | -                                      | 0 4                                 | 0 11        | 12 14          |        |  |
| 0                                                    | 0.453429895                            | 0                                   | 1.462272953 | 1.76462458     |        |  |
| 1.55733761                                           |                                        |                                     |             |                |        |  |
| ENSG00000272138                                      | 8.165258694                            | 6.194966072                         | 3.48747495  | 0              |        |  |
| 0                                                    | 0 5.949233238                          | 0                                   | 5.008180542 |                |        |  |
| 0.044722934                                          | 1 LINC01607                            | 8                                   | 79768142    |                |        |  |
| 79802842                                             | + 789                                  | lincRNA long intergenic non-protein |             |                |        |  |
| coding RNA 1607                                      | [Source:HGNC Symbol;Acc:HGNC:51660]    |                                     |             |                |        |  |
| 7                                                    | 3 0                                    | 0 0                                 | 0.558591329 | 9              |        |  |
| 0.420385258                                          | 0.236565331                            | 0 0                                 | 0           |                |        |  |
| ENSG00000070808                                      | 7.258007728                            | 3.539980612                         | 11.6249165  |                |        |  |
| 1.035968495                                          | 0 0                                    | 7.474301613                         | 0.345322832 |                |        |  |
| 4.369257652                                          | 0.044763181                            | 0.198898748                         | CAMK2A 5    |                |        |  |
| 150219491                                            | 150290291                              | -                                   | 6150        | protein_coding |        |  |
| calcium/calmodulin dependent protein kinase II alpha | [Source:HGNC Symbol;Acc:HGNC:1460]     |                                     |             |                |        |  |
| Symbol;Acc:HGNC:1460]                                | -                                      | 8 4                                 | 10 1        | 0              |        |  |
| 0                                                    | 0.063700605                            | 0.030818487                         | 0.101165337 |                |        |  |
| 0.009035182                                          | 0 0                                    |                                     |             |                |        |  |
| ENSG00000166037                                      | 1990.508619                            | 1331.03271                          | 1634.46326  |                |        |  |
| 1490.758664                                          | 1294.451733                            | 988.5843459                         | 1652.00153  |                |        |  |

|                                               |                                                        |             |                          |             |
|-----------------------------------------------|--------------------------------------------------------|-------------|--------------------------|-------------|
| 1257.931581                                   | 0.393697195                                            | 0.044884242 | 0.199386581              | CEP57       |
| 11                                            | 95789965                                               | 95832693    | + 7101                   |             |
| protein_coding                                | centrosomal protein 57 [Source:HGNC                    |             |                          |             |
| Symbol;Acc:HGNC:30794]                        | -                                                      | 2194 1504   | 1406 1439                | 1134        |
| 1146                                          | 15.1302392                                             | 10.03586393 | 12.31892056              |             |
| 11.26038721                                   | 9.816143579                                            | 7.504056981 |                          |             |
| ENSG00000055208                               | 1729.220341                                            | 1329.26272  | 1663.525551              |             |
| 1390.26972                                    | 1267.055929                                            | 1062.771304 | 1574.002871              |             |
| 1240.032318                                   | 0.344295148                                            | 0.044917357 | 0.199483585              | TAB2        |
| 6                                             | 149218641                                              | 149411613   | + 6010                   |             |
| protein_coding                                | TGF-beta activated kinase 1 (MAP3K7) binding protein 2 |             |                          |             |
| [Source:HGNC Symbol;Acc:HGNC:17075]           | -                                                      |             | 1906 1502                | 1431        |
| 1342                                          | 1110 1232                                              | 15.53020212 | 11.84191397              |             |
| 14.81398868                                   | 12.40766581                                            | 11.35261388 | 9.531631722              |             |
| ENSG00000136147                               | 547.9795835                                            | 462.8524651 | 535.9086506              |             |
| 583.2502626                                   | 783.0633941                                            | 672.8584553 | 515.580233               |             |
| 679.7240374                                   | -0.398709777                                           | 0.044963352 | 0.19962731               | PHF11       |
| 13                                            | 49495610                                               | 49528987    | + 4841                   |             |
| protein_coding                                | PHD finger protein 11 [Source:HGNC                     |             |                          |             |
| Symbol;Acc:HGNC:17024]                        | -                                                      | 604 523     | 461 563                  | 686         |
| 780                                           | 6.109849878                                            | 5.119093324 | 5.924786285              |             |
| 6.462273817                                   | 8.710365785                                            | 7.491875267 |                          |             |
| ENSG00000028528                               | 2040.407422                                            | 1948.759327 | 2390.082832              |             |
| 1635.794253                                   | 1719.086693                                            | 1844.322279 | 2126.416527              |             |
| 1733.067742                                   | 0.294393584                                            | 0.044972289 | 0.19962731               | SNX1        |
| 15                                            | 64094123                                               | 64146090    | + 9780                   |             |
| protein_coding                                | sorting nexin 1 [Source:HGNC Symbol;Acc:HGNC:11172]    |             |                          |             |
| -                                             | 2249 2202                                              | 2056 1579   | 1506 2138                |             |
| 11.2610603                                    | 10.66853781                                            | 13.07949879 | 8.971298743              |             |
| 9.465280252                                   | 10.16482402                                            |             |                          |             |
| ENSG00000177699                               | 16.33051739                                            | 1.769990306 | 1.16249165               | 0           |
| 0                                             | 0                                                      | 6.420999781 | 0                        | 5.119666008 |
| 0.044988858                                   | 1                                                      | AC011944.1  | 15                       | 78978889    |
| 78985926                                      | + 1900                                                 | antisense   | uncharacterized          |             |
| LOC100129540 [Source:NCBI gene;Acc:100129540] | -                                                      |             | 18                       | 2           |
| 1                                             | 0                                                      | 0           | 0.463924798              | 0.049877288 |
| 0.032745622                                   | 0                                                      | 0           | 0                        |             |
| ENSG00000253688                               | 16.33051739                                            | 1.769990306 | 1.16249165               | 0           |
| 0                                             | 0                                                      | 6.420999781 | 0                        | 5.119666008 |
| 0.044988858                                   | 1                                                      | AC026904.2  | 8                        | 48551527    |
| 48556441                                      | -                                                      | 1579        | lincRNA novel transcript | -           |
| 18                                            | 2                                                      | 1           | 0                        | 0.558237566 |
| 0.060017003                                   | 0.039402585                                            | 0           | 0                        | 0           |
| ENSG00000196313                               | 2410.565817                                            | 2389.486913 | 2270.346192              |             |
| 2815.762369                                   | 2611.733303                                            | 3090.835699 | 2356.799641              |             |
| 2839.44379                                    | -0.268939775                                           | 0.044993076 | 0.199631472              | POM121      |
| 7                                             | 72879365                                               | 72951440    | + 9822                   |             |
| protein_coding                                | POM121 transmembrane nucleoporin [Source:HGNC          |             |                          |             |
| Symbol;Acc:HGNC:19702]                        | -                                                      | 2657 2700   | 1953 2718                | 2288        |
| 3583                                          | 13.24708455                                            | 13.02537619 | 12.371124                |             |

|                        |                                                  |                  |             |             |         |                |
|------------------------|--------------------------------------------------|------------------|-------------|-------------|---------|----------------|
| 15.37664423            | 14.3186954                                       | 16.96203271      |             |             |         |                |
| ENSG00000148908        | 166.0269268                                      | 136.2892536      | 297.5978624 |             |         |                |
| 124.3162194            | 125.5641011                                      | 112.1430759      | 199.9713476 |             |         |                |
| 120.6744655            | 0.725950545                                      | 0.044995799      | 0.199631472 | RGS10       |         |                |
| 10                     | 119499828                                        | 119542708        | -           | 1252        |         |                |
| protein_coding         | regulator of G protein signaling 10 [Source:HGNC |                  |             |             |         |                |
| Symbol;Acc:HGNC:9992]  | -                                                | 183              | 154         | 256         | 120     | 110            |
| 130                    | 7.15773218                                       | 5.828312544      | 12.72162188 |             |         |                |
| 5.325850371            | 5.400521713                                      | 4.828030907      |             |             |         |                |
| ENSG00000230648        | 6.350756762                                      | 7.964956378      | 3.48747495  | 0           |         |                |
| 0                      | 0                                                | 5.93439603       | 0           | 5.00472332  |         |                |
| 0.045025119            | 1                                                | AL138831.1       | 6           | 4018843     | 4021215 | -              |
| 209                    | antisense                                        | novel transcript | -           |             |         | 7              |
| 9                      | 3                                                | 0                | 0           | 1.640138176 |         |                |
| 2.040434529            | 0.893062421                                      | 0                | 0           | 0           |         |                |
| ENSG00000180694        | 870.0536764                                      | 923.0499447      | 812.5816633 |             |         |                |
| 1269.061406            | 1299.0177                                        | 847.9741815      | 868.5617615 |             |         |                |
| 1138.684429            | -0.389382801                                     | 0.045025197      | 0.199711813 | TMEM64      |         |                |
| 8                      | 90621995                                         | 90791632         | -           | 5870        |         |                |
| protein_coding         | transmembrane protein 64 [Source:HGNC            |                  |             |             |         |                |
| Symbol;Acc:HGNC:25441] | -                                                | 959              | 1043        | 699         | 1225    | 1138           |
| 983                    | 8.000353731                                      | 8.419235313      | 7.408766733 |             |         |                |
| 11.59604871            | 11.91657693                                      | 7.786574348      |             |             |         |                |
| ENSG00000134313        | 1972.3636                                        | 1537.236581      | 1592.61356  |             |         |                |
| 1668.945245            | 1175.736583                                      | 1063.633943      | 1700.737914 |             |         |                |
| 1302.771924            | 0.385025895                                      | 0.04504902       | 0.199767388 |             |         |                |
| KIDINS220              | 2                                                | 8721081          | 8837630     | -           | 15362   | protein_coding |
|                        | kinase D interacting substrate 220 [Source:HGNC  |                  |             |             |         |                |
| Symbol;Acc:HGNC:29508] | -                                                | 2174             | 1737        | 1370        | 1611    | 1030           |
| 1233                   | 6.930115336                                      | 5.357701314      | 5.548551904 |             |         |                |
| 5.827198647            | 4.121324626                                      | 3.732040379      |             |             |         |                |
| ENSG00000285943        | 26.31027801                                      | 22.12487883      | 8.137441549 |             |         |                |
| 6.215810969            | 3.424475485                                      | 0                | 18.8575328  | 3.213428818 |         |                |
| 2.577878278            | 0.045063449                                      | 0.199781289      | AC112128.1  |             |         |                |
| 3                      | 113361901                                        | 113515151        | -           | 6837        |         |                |
| protein_coding         | novel protein                                    | -                | 29          | 25          | 7       | 6              |
| 3                      | 0                                                | 0.207711768      | 0.173261021 | 0.063699982 |         |                |
| 0.048763819            | 0.026971372                                      | 0                |             |             |         |                |
| ENSG00000143947        | 7315.164539                                      | 9225.189476      | 10017.19055 |             |         |                |
| 7457.937195            | 7313.538143                                      | 7106.420455      | 8852.514854 |             |         |                |
| 7292.631931            | 0.279543475                                      | 0.045146964      | 0.200101392 | RPS27A      |         |                |
| 2                      | 55231903                                         | 55235853         | +           | 3130        |         |                |
| protein_coding         | ribosomal protein S27a [Source:HGNC              |                  |             |             |         |                |
| Symbol;Acc:HGNC:10417] | -                                                | 8063             | 10424       | 8617        | 7199    | 6407           |
| 8238                   | 126.1481848                                      | 157.8034544      | 171.2847121 |             |         |                |
| 127.8026561            | 125.8223368                                      | 122.3794419      |             |             |         |                |
| ENSG00000115641        | 315.7233362                                      | 335.413163       | 305.7353039 |             |         |                |
| 462.0419487            | 348.1550076                                      | 510.6823148      | 318.9572677 |             |         |                |
| 440.2930904            | -0.466061561                                     | 0.045186568      | 0.200226752 | FHL2        |         |                |
| 2                      | 105357712                                        | 105438513        | -           | 6626        |         |                |

|                               |                                                           |                        |                                    |                |      |        |  |
|-------------------------------|-----------------------------------------------------------|------------------------|------------------------------------|----------------|------|--------|--|
| protein_coding                | four and a half LIM domains 2                             | [Source:HGNC           |                                    |                |      |        |  |
| Symbol;Acc:HGNC:3703]         | -                                                         | 348                    | 379                                | 263            | 446  | 305    |  |
| 592                           | 2.571914317                                               | 2.710280368            | 2.469512129                        |                |      |        |  |
| 3.740205554                   | 2.829409243                                               | 4.154332884            |                                    |                |      |        |  |
| ENSG00000268061               | 8.165258694                                               | 4.424975766            | 4.6499666                          |                |      |        |  |
| 4.14387398                    | 52.5086241                                                | 20.70333709            | 5.746733686                        |                |      |        |  |
| 25.78527839                   | -2.158343582                                              | 0.045204776            | 0.200257271                        |                |      | NAPA-  |  |
| AS1                           | 19                                                        | 47484282               | 47501597                           | +              | 1894 |        |  |
| antisense                     | NAPA antisense RNA 1                                      | [Source:HGNC           |                                    |                |      |        |  |
| Symbol;Acc:HGNC:44118]        | -                                                         | 9                      | 5                                  | 4              | 4    | 46     |  |
| 24                            | 0.232697233                                               | 0.125088237            | 0.131397428                        |                |      |        |  |
| 0.117352423                   | 1.492881091                                               | 0.589199385            |                                    |                |      |        |  |
| ENSG00000285035               | 9.979760626                                               | 4.424975766            | 3.48747495                         |                |      | 0      |  |
| 0                             | 0                                                         | 5.964070447            | 0                                  | 5.011608839    |      |        |  |
| 0.045209096                   | 1                                                         | AC091057.7             | 15                                 | 30644633       |      |        |  |
| 30723495                      | +                                                         | 675                    | transcribed_unprocessed_pseudogene |                |      |        |  |
|                               | "Serine/threonine-protein kinase ULK4 (ULK4), pseudogene" |                        |                                    |                |      |        |  |
| -                             | 11                                                        | 5                      | 3                                  | 0              | 0    |        |  |
| 0.798027019                   | 0.350988326                                               | 0.276518587            | 0                                  | 0              | 0    |        |  |
| ENSG00000181634               | 58.06406182                                               | 26.54985459            | 33.71225785                        |                |      | 0      |  |
| 18.26386925                   | 12.93958568                                               | 39.44205809            | 10.40115164                        |                |      |        |  |
| 1.925872374                   | 0.045238865                                               | 0.200337437            | TNFSF15                            | 9              |      |        |  |
| 114784635                     | 114806126                                                 | -                      | 7889                               | protein_coding |      |        |  |
|                               | TNF superfamily member 15                                 | [Source:HGNC           | Symbol;Acc:HGNC:11931]             |                |      |        |  |
| -                             | 64                                                        | 30                     | 29                                 | 0              | 16   | 15     |  |
| 0.397270852                   | 0.180187948                                               | 0.228708807            | 0                                  | 0.124665243    |      |        |  |
| 0.088409782                   |                                                           |                        |                                    |                |      |        |  |
| ENSG00000130881               | 1383.557723                                               | 1503.606765            | 1576.338677                        |                |      |        |  |
| 1113.666132                   | 1418.874342                                               | 965.2930917            | 1487.834389                        |                |      |        |  |
| 1165.944522                   | 0.35246834                                                | 0.045245523            | 0.200337437                        |                |      | LRP3   |  |
| 19                            | 33177603                                                  | 33208867               | +                                  | 5095           |      |        |  |
| protein_coding                | LDL receptor related protein 3                            | [Source:HGNC           |                                    |                |      |        |  |
| Symbol;Acc:HGNC:6695]         | -                                                         | 1525                   | 1699                               | 1356           | 1075 | 1243   |  |
| 1119                          | 14.65731222                                               | 15.80067468            | 16.55855168                        |                |      |        |  |
| 11.72401376                   | 14.99596094                                               | 10.21214368            |                                    |                |      |        |  |
| ENSG00000106077               | 272.1752898                                               | 213.2838319            | 195.2985972                        |                |      |        |  |
| 308.7186115                   | 269.3920714                                               | 419.242576             | 226.9192396                        |                |      |        |  |
| 332.4510863                   | -0.551413745                                              | 0.045281558            | 0.200432109                        |                |      | ABHD11 |  |
| 7                             | 73736094                                                  | 73738867               | -                                  | 2289           |      |        |  |
| protein_coding                | abhydrolase domain containing 11                          | [Source:HGNC           |                                    |                |      |        |  |
| Symbol;Acc:HGNC:16407]        | -                                                         | 300                    | 241                                | 168            | 298  | 236    |  |
| 486                           | 6.418065509                                               | 4.988818347            | 4.566361982                        |                |      |        |  |
| 7.234066805                   | 6.337435766                                               | 9.872371616            |                                    |                |      |        |  |
| ENSG00000131446               | 2353.409006                                               | 2943.493879            | 2605.143787                        |                |      |        |  |
| 2991.877013                   | 3334.29763                                                | 3268.539343            | 2634.015557                        |                |      |        |  |
| 3198.237995                   | -0.27993651                                               | 0.045289566            | 0.200432109                        |                |      | MGAT1  |  |
| 5                             | 180784782                                                 | 180815652              | -                                  | 11576          |      |        |  |
| protein_coding                | "mannosyl (alpha-1,3-)-glycoprotein beta-1,2-N-           |                        |                                    |                |      |        |  |
| acetylglucosaminyltransferase | [Source:HGNC                                              | Symbol;Acc:HGNC:7044]" |                                    |                |      |        |  |
| -                             | 2594                                                      | 3326                   | 2241                               | 2888           | 2921 | 3789   |  |

|                                                                 |                                                |              |                |             |
|-----------------------------------------------------------------|------------------------------------------------|--------------|----------------|-------------|
| 10.97337289                                                     | 13.6141386                                     | 12.04453908  | 13.86279224    |             |
| 15.51030718                                                     | 15.21938507                                    |              |                |             |
| ENSG00000118096                                                 | 765.7198153                                    | 891.1901192  | 991.6053774    |             |
| 913.7242125                                                     | 1196.283436                                    | 1340.541076  | 882.8384373    |             |
| 1150.182908                                                     | -0.382674316                                   | 0.045380954  | 0.200786318    | IFT46       |
| 11                                                              | 118544528                                      | 118572970    | - 3814         |             |
| protein_coding                                                  | intraflagellar transport 46                    | [Source:HGNC |                |             |
| Symbol;Acc:HGNC:26146]                                          | -                                              | 844 1007     | 853 882        | 1048        |
| 1554                                                            | 10.83653509                                    | 12.510516    | 13.91474299    |             |
| 12.84990568                                                     | 16.88993406                                    | 18.94529377  |                |             |
| ENSG00000163888                                                 | 155.1399152                                    | 241.6036768  | 184.8361723    |             |
| 136.7478413                                                     | 134.6960357                                    | 94.02765594  | 193.8599214    |             |
| 121.8238443                                                     | 0.673182795                                    | 0.045401497  | 0.200826978    |             |
| CAMK2N2 3                                                       | 184259213                                      | 184261463    | - 1362         |             |
| protein_coding                                                  | calcium/calmodulin dependent protein kinase II |              |                |             |
| inhibitor 2 [Source:HGNC                                        | Symbol;Acc:HGNC:24197]                         | -            | 171 273        |             |
| 159                                                             | 132 118                                        | 109          | 6.14819575     | 9.497558566 |
| 7.263180939                                                     | 5.385287174                                    | 5.325400319  | 3.72117769     |             |
| ENSG00000138795                                                 | 739.4095373                                    | 629.2315539  | 591.7082498    |             |
| 628.8328764                                                     | 433.7668947                                    | 342.467701   | 653.4497803    |             |
| 468.355824                                                      | 0.481837907                                    | 0.045418607  | 0.200852435    | LEF1        |
| 4                                                               | 108047545                                      | 108168956    | - 5361         |             |
| protein_coding                                                  | lymphoid enhancer binding factor 1             | [Source:HGNC |                |             |
| Symbol;Acc:HGNC:6551]                                           | HMG                                            | 815 711      | 509 607        | 380         |
| 397                                                             | 7.444584865                                    | 6.284203414  | 5.90716119     |             |
| 6.291510525                                                     | 4.356975819                                    | 3.44330678   |                |             |
| ENSG00000122674                                                 | 930.8394911                                    | 745.1659189  | 854.4313627    |             |
| 1101.23451                                                      | 1022.776678                                    | 1062.771304  | 843.4789242    |             |
| 1062.260831                                                     | -0.332972998                                   | 0.045443049  | 0.2008912      | CCZ1        |
| 7                                                               | 5898725 5926550 +                              | 6431         | protein_coding | "CCZ1       |
| homolog, vacuolar protein trafficking and biogenesis associated | [Source:HGNC Symbol;Acc:HGNC:21691]"           |              |                |             |
| 1063                                                            | 896 1232                                       | 7.812634997  | 6.203831916    | 735         |
| 7.110754358                                                     | 9.184738556                                    | 8.564003977  | 8.907651477    |             |
| ENSG00000163126                                                 | 0 0.884995153                                  | 3.48747495   | 5.179842475    |             |
| 0                                                               | 43.13195226                                    | 1.457490034  |                |             |
| 16.10393158                                                     | -3.520265874                                   | 0.045461179  | 0.2008912      |             |
| ANKRD23 2                                                       | 96824526                                       | 96857934     | - 4116         |             |
| protein_coding                                                  | ankyrin repeat domain 23                       | [Source:HGNC |                |             |
| Symbol;Acc:HGNC:24470]                                          | -                                              | 0 1 3 5 0    |                |             |
| 50                                                              | 0 0.011512008                                  | 0.045347436  | 0.067500452    |             |
| 0                                                               | 0.564840276                                    |              |                |             |
| ENSG00000198420                                                 | 558.866595                                     | 467.2774408  | 597.520708     |             |
| 427.8549884                                                     | 349.2964994                                    | 431.3195226  | 541.2215813    |             |
| 402.8236702                                                     | 0.42429873                                     | 0.045461443  | 0.2008912      | TCAF1       |
| 7                                                               | 143851375                                      | 143902198    | - 6310         |             |
| protein_coding                                                  | TRPM8 channel associated factor 1              | [Source:HGNC |                |             |
| Symbol;Acc:HGNC:22201]                                          | -                                              | 616 528      | 514 413        | 306         |
| 500                                                             | 4.780573904                                    | 3.964888732  | 5.06804668     |             |
| 3.636911524                                                     | 2.98084523                                     | 3.684441482  |                |             |

|                                                                        |                                                                                                                  |             |             |             |                       |
|------------------------------------------------------------------------|------------------------------------------------------------------------------------------------------------------|-------------|-------------|-------------|-----------------------|
| ENSG00000168282                                                        | 29.93928188                                                                                                      | 73.45459771 | 72.07448229 |             |                       |
| 10.35968495                                                            | 36.5277385                                                                                                       | 22.42861518 | 58.48945396 |             |                       |
| 23.10534621                                                            | 1.342573045                                                                                                      | 0.045482271 | 0.200933039 | MGAT2       |                       |
| 14                                                                     | 49620795                                                                                                         | 49623481    | +           | 2687        |                       |
| protein_coding                                                         | "mannosyl (alpha-1,6-)-glycoprotein beta-1,2-N-acetylglucosaminyltransferase [Source:HGNC Symbol;Acc:HGNC:7045]" |             |             |             |                       |
| -                                                                      | 33                                                                                                               | 83          | 62          | 10          | 32 26                 |
| 0.601415971                                                            | 1.463648752                                                                                                      | 1.435591472 | 0.206797068 |             |                       |
| 0.732031336                                                            | 0.449921451                                                                                                      |             |             |             |                       |
| ENSG00000182372                                                        | 800.195352                                                                                                       | 864.6402646 | 933.4807949 |             |                       |
| 959.3068263                                                            | 1215.688797                                                                                                      | 1113.667007 | 866.1054705 |             |                       |
| 1096.220877                                                            | -0.340265304                                                                                                     | 0.045518027 | 0.201040795 | CLN8        |                       |
| 8                                                                      | 1755778                                                                                                          | 1801711     | +           | 9459        | protein_coding "CLN8, |
| transmembrane ER and ERGIC protein [Source:HGNC Symbol;Acc:HGNC:2079]" | -                                                                                                                | 882         | 977         | 803         | 926 1065              |
| 1291                                                                   | 4.566169651                                                                                                      | 4.894133133 | 5.281741796 |             |                       |
| 5.439735771                                                            | 6.920727389                                                                                                      | 6.346174869 |             |             |                       |
| ENSG00000200397                                                        | 0                                                                                                                | 0           | 0           | 0           | 11.41491828           |
| 9.489029498                                                            | 0                                                                                                                | 6.967982593 | -5.27647657 | 0.045556747 |                       |
| 1                                                                      | RF00019                                                                                                          | 7           | 87218611    | 87218712    | -                     |
| 102                                                                    | misc_RNA                                                                                                         |             | -           | 0           | 0 0                   |
| 0                                                                      | 10                                                                                                               | 11          | 0           | 0           | 0 0                   |
| 6.02625061                                                             | 5.014452613                                                                                                      |             |             |             |                       |
| ENSG00000088451                                                        | 402.8194289                                                                                                      | 374.3529498 | 341.7725451 |             |                       |
| 218.5893524                                                            | 329.8911383                                                                                                      | 242.4015717 | 372.9816412 |             |                       |
| 263.6273542                                                            | 0.502808858                                                                                                      | 0.045574679 | 0.201240761 | TGDS        |                       |
| 13                                                                     | 94574051                                                                                                         | 94596257    | -           | 2589        |                       |
| protein_coding                                                         | "TDP-glucose 4,6-dehydratase [Source:HGNC Symbol;Acc:HGNC:20324]"                                                |             |             |             |                       |
| 281                                                                    | 8.398072184                                                                                                      | 7.741671833 | 7.065162035 |             | 289                   |
| 4.528584216                                                            | 6.861406546                                                                                                      | 5.046674419 |             |             |                       |
| ENSG00000137198                                                        | 33.56828574                                                                                                      | 28.3198449  | 27.8997996  |             |                       |
| 70.44585765                                                            | 63.92354238                                                                                                      | 54.34625985 | 29.92931008 |             |                       |
| 62.90521996                                                            | -1.069455683                                                                                                     | 0.045752553 | 0.201975772 | GMPR        |                       |
| 6                                                                      | 16238580                                                                                                         | 16295549    | +           | 2232        |                       |
| protein_coding                                                         | guanosine monophosphate reductase [Source:HGNC Symbol;Acc:HGNC:4376]                                             |             |             |             |                       |
| 63                                                                     | 0.811776019                                                                                                      | 0.679332245 | 0.668996581 |             | 56                    |
| 1.692882307                                                            | 1.542201769                                                                                                      | 1.312433712 |             |             |                       |
| ENSG00000184831                                                        | 248.5867647                                                                                                      | 287.6234248 | 290.6229125 |             |                       |
| 211.337573                                                             | 190.6291353                                                                                                      | 173.3904481 | 275.611034  |             |                       |
| 191.7857188                                                            | 0.523486425                                                                                                      | 0.045780836 | 0.202050202 | AP00        |                       |
| X                                                                      | 23833353                                                                                                         | 23907934    | -           | 2353        |                       |
| protein_coding                                                         | apolipoprotein 0 [Source:HGNC Symbol;Acc:HGNC:28727]                                                             |             |             |             |                       |
| -                                                                      | 274                                                                                                              | 325         | 250         | 204         | 167 201               |
| 5.702395289                                                            | 6.544671831                                                                                                      | 6.610357204 | 4.817484033 |             |                       |
| 4.362564934                                                            | 3.97196258                                                                                                       |             |             |             |                       |
| ENSG00000162302                                                        | 1363.598202                                                                                                      | 1533.6966   | 1646.088176 |             |                       |
| 738.6455369                                                            | 1165.463157                                                                                                      | 1460.447904 | 1514.460993 |             |                       |
| 1121.518866                                                            | 0.432532264                                                                                                      | 0.045795232 | 0.202063321 |             |                       |



|                        |                                              |                                     |                  |         |     |
|------------------------|----------------------------------------------|-------------------------------------|------------------|---------|-----|
| RPS6KA4 11             | 64359148                                     | 64372215                            | +                | 3807    |     |
| protein_coding         | ribosomal protein S6 kinase A4               | [Source:HGNC                        |                  |         |     |
| Symbol;Acc:HGNC:10433] | -                                            | 1503 1733                           | 1416 713         | 1021    |     |
| 1693                   | 19.33324646                                  | 21.56960176                         | 23.14127179      |         |     |
| 10.40683567            | 16.48504836                                  | 20.67783661                         |                  |         |     |
| ENSG00000115998        | 205.9459693                                  | 178.7690209                         | 195.2985972      |         |     |
| 289.0352101            | 218.0249392                                  | 345.0556181                         | 193.3378625      |         |     |
| 284.0385891            | -0.55703873                                  | 0.045823042                         | 0.202135607      |         |     |
| C2orf42 2              | 70149880                                     | 70248615                            | -                | 3630    |     |
| protein_coding         | chromosome 2 open reading frame 42           | [Source:HGNC                        |                  |         |     |
| Symbol;Acc:HGNC:26056] | -                                            | 227 202                             | 168 279          | 191     |     |
| 400                    | 3.062301279                                  | 2.636763542                         | 2.879449746      |         |     |
| 4.270803814            | 3.23425384                                   | 5.123708154                         |                  |         |     |
| ENSG00000099331        | 4104.40337                                   | 4312.581381                         | 4251.231964      |         |     |
| 4970.576839            | 4869.604139                                  | 5063.691196                         | 4222.738905      |         |     |
| 4967.957391            | -0.234541003                                 | 0.045841182                         | 0.202165212      | MY09B   |     |
| 19                     | 17075781                                     | 17214537                            | +                | 9948    |     |
| protein_coding         | myosin IXB                                   | [Source:HGNC Symbol;Acc:HGNC:7609]  | -                |         |     |
| 4524                   | 4873 3657                                    | 4798 4266                           | 5870 22.26975828 |         |     |
| 23.21063786            | 22.87157279                                  | 26.80010593                         | 26.35921271      |         |     |
| 27.43679275            |                                              |                                     |                  |         |     |
| ENSG00000198498        | 737.5950353                                  | 704.4561419                         | 661.4577488      |         |     |
| 577.0344517            | 555.9065203                                  | 504.6438415                         | 701.169642       |         |     |
| 545.8616045            | 0.362207655                                  | 0.045875833                         | 0.202168552      | TMA16   |     |
| 4                      | 163494442                                    | 163520539                           | +                | 3513    |     |
| protein_coding         | translation machinery associated 16 homolog  | [Source:HGNC Symbol;Acc:HGNC:25638] | -                | 813 796 | 569 |
| 557                    | 487 585                                      | 11.33290059                         | 10.73646614      |         |     |
| 10.07722518            | 8.810267383                                  | 8.52114924                          | 7.742990643      |         |     |
| ENSG00000100413        | 1124.991198                                  | 1611.576174                         | 1081.117234      |         |     |
| 1486.61479             | 1522.750099                                  | 1972.855497                         | 1272.561535      |         |     |
| 1660.740129            | -0.383917098                                 | 0.045876845                         | 0.202168552      | POLR3H  |     |
| 22                     | 41525804                                     | 41544606                            | -                | 6594    |     |
| protein_coding         | RNA polymerase III subunit H                 | [Source:HGNC                        |                  |         |     |
| Symbol;Acc:HGNC:30349] | -                                            | 1240 1821                           | 930 1435         | 1334    |     |
| 2287                   | 9.208765755                                  | 13.08541329                         | 8.774873258      |         |     |
| 12.09246953            | 12.43524216                                  | 16.12680148                         |                  |         |     |
| ENSG00000167106        | 352.9206258                                  | 538.9620483                         | 545.2085838      |         |     |
| 561.4949242            | 667.7727195                                  | 734.1058275                         | 479.0304193      |         |     |
| 654.4578237            | -0.45143921                                  | 0.04589964                          | 0.202168552      |         |     |
| FAM102A 9              | 127940579                                    | 127980513                           | -                | 6100    |     |
| protein_coding         | family with sequence similarity 102 member A | [Source:HGNC Symbol;Acc:HGNC:31419] | -                | 389 609 | 469 |
| 542                    | 585 851                                      | 3.12283077                          | 4.730574631      |         |     |
| 4.783544895            | 4.937208809                                  | 5.894858588                         | 6.486803513      |         |     |
| ENSG00000163026        | 532.556317                                   | 448.6925426                         | 464.99666        |         |     |
| 723.1060094            | 657.499293                                   | 536.5614862                         | 482.0818399      |         |     |
| 639.0555962            | -0.405625797                                 | 0.045911572                         | 0.202168552      | WDCP    |     |
| 2                      | 24029340                                     | 24049575                            | -                | 3847    |     |
| protein_coding         | WD repeat and coiled coil containing         | [Source:HGNC                        |                  |         |     |

|                        |                                       |             |             |             |      |             |
|------------------------|---------------------------------------|-------------|-------------|-------------|------|-------------|
| Symbol;Acc:HGNC:26157] | -                                     | 587         | 507         | 400         | 698  | 576         |
| 622                    | 7.472133086                           | 6.244709123 | 6.469111724 |             |      |             |
| 10.08196719            | 9.203386426                           | 7.517946252 |             |             |      |             |
| ENSG00000154945        | 1732.849345                           | 1664.675883 | 1580.988644 |             |      |             |
| 1386.125846            | 1319.564553                           | 1390.574141 | 1659.504624 |             |      |             |
| 1365.421514            | 0.281487403                           | 0.045921535 | 0.202168552 |             |      |             |
| ANKRD40 17             | 50693190                              | 50707924    | -           | 4849        |      |             |
| protein_coding         | ankyrin repeat domain 40 [Source:HGNC |             |             |             |      |             |
| Symbol;Acc:HGNC:28233] | -                                     | 1910        | 1881        | 1360        | 1338 | 1156        |
| 1612                   | 19.28900682                           | 18.38074255 | 17.44992525 |             |      |             |
| 15.3326059             | 14.6538928                            | 15.45766431 |             |             |      |             |
| ENSG00000197535        | 1893.432766                           | 1311.562817 | 1644.925685 |             |      |             |
| 1521.837719            | 1256.782503                           | 782.4136141 | 1616.640423 |             |      |             |
| 1187.011279            | 0.446326875                           | 0.045926151 | 0.202168552 |             |      | MY05A       |
| 15                     | 52307283                              | 52529050    | -           | 12988       |      |             |
| protein_coding         | myosin VA [Source:HGNC                |             |             |             |      |             |
| Symbol;Acc:HGNC:7602]  | -                                     |             |             |             |      |             |
| 2087                   | 1482                                  | 1415        | 1469        | 1101        | 907  | 7.868806262 |
| 5.406701143            | 6.778303437                           | 6.284801414 | 5.210655959 |             |      |             |
| 3.247102703            |                                       |             |             |             |      |             |
| ENSG00000274762        | 32.66103478                           | 11.50493699 | 6.974949899 |             |      |             |
| 6.215810969            | 0                                     | 0           | 17.04697389 | 2.07193699  |      |             |
| 3.052738746            | 0.04593036                            | 0.202168552 | AL049777.1  | 14          |      |             |
| 28818741               | 28819258                              | +           | 518         | antisense   |      |             |
| novel transcript       | -                                     | 36          | 13          | 6           | 6    |             |
| 0                      | 0                                     | 3.403309332 | 1.189159291 | 0.720656548 |      |             |
| 0.643625933            | 0                                     | 0           |             |             |      |             |
| ENSG00000188785        | 391.0251663                           | 298.2433666 | 296.4353707 |             |      |             |
| 391.5960911            | 410.9370581                           | 584.0066337 | 328.5679679 |             |      |             |
| 462.1799276            | -0.492888207                          | 0.045936403 | 0.202168552 |             |      | ZNF548      |
| 19                     | 57389850                              | 57402992    | +           | 6161        |      |             |
| protein_coding         | zinc finger protein 548 [Source:HGNC  |             |             |             |      |             |
| Symbol;Acc:HGNC:26561] | zf-C2H2                               | 431         | 337         | 255         | 378  | 360         |
| 677                    | 3.425742731                           | 2.591821767 | 2.575110195 |             |      |             |
| 3.409201216            | 3.591688401                           | 5.109383228 |             |             |      |             |
| ENSG00000133313        | 1437.992781                           | 1444.31209  | 1973.910822 |             |      |             |
| 1107.450321            | 1437.138212                           | 1243.925503 | 1618.738564 |             |      |             |
| 1262.838012            | 0.357729027                           | 0.045944801 | 0.202168552 |             |      | CNDP2       |
| 18                     | 74495816                              | 74523454    | +           | 11848       |      |             |
| protein_coding         | carnosine dipeptidase 2 [Source:HGNC  |             |             |             |      |             |
| Symbol;Acc:HGNC:24437] | -                                     | 1585        | 1632        | 1698        | 1069 | 1259        |
| 1442                   | 6.551080025                           | 6.526818709 | 8.916604156 |             |      |             |
| 5.013542529            | 6.531727303                           | 5.65915036  |             |             |      |             |
| ENSG00000100104        | 544.3505796                           | 496.4822809 | 562.6459585 |             |      |             |
| 594.6459161            | 722.5643272                           | 774.6498627 | 534.4929397 |             |      |             |
| 697.286702             | -0.384484971                          | 0.045967744 | 0.202219205 |             |      | SRRD        |
| 22                     | 26483877                              | 26494658    | +           | 4319        |      |             |
| protein_coding         | SRR1 domain containing [Source:HGNC   |             |             |             |      |             |
| Symbol;Acc:HGNC:33910] | -                                     | 600         | 561         | 484         | 574  | 633         |
| 898                    | 6.802941398                           | 6.154688793 | 6.972186638 |             |      |             |
| 7.384833907            | 9.008819099                           | 9.667721937 |             |             |      |             |

|                                       |                                                  |             |                  |        |
|---------------------------------------|--------------------------------------------------|-------------|------------------|--------|
| ENSG00000138686                       | 434.5732127                                      | 367.2729885 | 424.3094522      |        |
| 361.5530047                           | 227.1568738                                      | 280.3576897 | 408.7185512      |        |
| 289.6891894                           | 0.495659437                                      | 0.046042259 | 0.202496647      | BBS7   |
| 4                                     | 121824440                                        | 121870497   | - 4829           |        |
| protein_coding                        | Bardet-Biedl syndrome 7 [Source:HGNC             |             |                  |        |
| Symbol;Acc:HGNC:18758]                | -                                                | 479 415     | 365 349          | 199    |
| 325                                   | 4.857434931                                      | 4.072089663 | 4.70264836       |        |
| 4.01587573                            | 2.533046902                                      | 3.129371865 |                  |        |
| ENSG00000164188                       | 150.6036604                                      | 50.44472373 | 77.88694054      |        |
| 71.48182615                           | 29.67878753                                      | 6.901112362 | 92.97844154      |        |
| 36.02057535                           | 1.373270336                                      | 0.046110461 | 0.202717056      |        |
| RANBP3L 5                             | 36248434                                         | 36302114    | - 3363           |        |
| protein_coding                        | RAN binding protein 3 like [Source:HGNC          |             |                  |        |
| Symbol;Acc:HGNC:26353]                | -                                                | 166 57      | 67 69            | 26     |
| 8                                     | 2.417185076                                      | 0.803108882 | 1.239523549      |        |
| 1.140077217                           | 0.475219049                                      | 0.110609935 |                  |        |
| ENSG00000171227                       | 18.14501932                                      | 15.0449176  | 12.78740815      | 0      |
| 5.707459141                           | 0                                                | 15.32578169 | 1.90248638       |        |
| 3.063277897                           | 0.046115294                                      | 0.202717056 | TMEM37 2         |        |
| 119429901                             | 119438520                                        | + 2292      | protein_coding   |        |
| transmembrane protein 37 [Source:HGNC | Symbol;Acc:HGNC:18216]                           |             |                  | -      |
| 20                                    | 17 11                                            | 0 5         | 0 0.427310993    |        |
| 0.351447735                           | 0.298596641                                      | 0           | 0.134091964      | 0      |
| ENSG00000143195                       | 731.2442786                                      | 487.6323294 | 480.1090514      |        |
| 542.8474913                           | 317.3347282                                      | 309.6874173 | 566.3285531      |        |
| 389.9565456                           | 0.539284232                                      | 0.046137911 | 0.20276609       | ILDR2  |
| 1                                     | 166895711                                        | 166975482   | - 13884          |        |
| protein_coding                        | immunoglobulin like domain containing receptor 2 |             |                  |        |
| [Source:HGNC                          | Symbol;Acc:HGNC:18131]                           |             |                  | -      |
| 524                                   | 278 359                                          | 2.842818417 | 1.88045712       | 413    |
| 1.850726712                           | 2.097146286                                      | 1.23077184  | 1.202294504      |        |
| ENSG00000152465                       | 416.4281934                                      | 417.7177123 | 487.0840013      |        |
| 339.7976663                           | 332.174122                                       | 309.6874173 | 440.409969       |        |
| 327.2197352                           | 0.428132584                                      | 0.046172147 | 0.202866148      | NMT2   |
| 10                                    | 15102584                                         | 15168693    | - 4700           |        |
| protein_coding                        | N-myristoyltransferase 2 [Source:HGNC            |             |                  |        |
| Symbol;Acc:HGNC:7858]                 | -                                                | 459 472     | 419 328          | 291    |
| 359                                   | 4.78237372                                       | 4.758505565 | 5.546551013      |        |
| 3.877823422                           | 3.805769587                                      | 3.551629125 |                  |        |
| ENSG00000123179                       | 877.3116841                                      | 1061.994184 | 739.3446893      |        |
| 1126.097754                           | 1285.319799                                      | 1048.10644  | 892.8835191      |        |
| 1153.174664                           | -0.367542497                                     | 0.046233346 | 0.203035982      | EBPL   |
| 13                                    | 49660723                                         | 49691475    | - 1500           |        |
| protein_coding                        | EBP like [Source:HGNC                            |             |                  |        |
| Symbol;Acc:HGNC:18061]                | -                                                | 1087 1126   | 1215 31.56922341 | -      |
| 967                                   | 1200 636                                         | 1087 1126   | 1215 31.56922341 |        |
| 37.90673924                           | 26.37987317                                      | 40.26709772 | 46.14179567      |        |
| 37.66309771                           |                                                  |             |                  |        |
| ENSG00000156239                       | 357.4568806                                      | 449.5775378 | 305.7353039      |        |
| 469.2937282                           | 488.5585025                                      | 564.1659356 | 370.9232408      |        |
| 507.3393888                           | -0.450721723                                     | 0.04624293  | 0.203035982      | N6AMT1 |

|                                             |                                                       |             |           |                |        |
|---------------------------------------------|-------------------------------------------------------|-------------|-----------|----------------|--------|
| 21                                          | 28872191                                              | 28885371    | -         | 4865           |        |
| protein_coding                              | N-6 adenine-specific DNA methyltransferase 1          |             |           |                |        |
| [Source:HGNC Symbol;Acc:HGNC:16021]         |                                                       |             | -         | 394 508        | 263    |
| 453                                         | 428 654                                               | 3.965902753 |           | 4.947744999    |        |
| 3.363409531                                 | 5.174011636                                           | 5.407646385 |           | 6.250660654    |        |
| ENSG00000133243                             | 3081.02428                                            | 3317.846829 |           | 3098.040247    |        |
| 3438.379435                                 | 3593.416275                                           | 4601.316668 |           | 3165.637119    |        |
| 3877.704126                                 | -0.292963554                                          | 0.046245236 |           | 0.203035982    | BTBD2  |
| 19                                          | 1985438 2034881                                       | -           | 5944      | protein_coding | BTB    |
| domain containing 2                         | [Source:HGNC Symbol;Acc:HGNC:15504]                   |             |           |                | 3396   |
| 3749                                        | 2665 3319                                             | 3148 5334   |           | 27.97805789    |        |
| 29.88567577                                 | 27.89492893                                           | 31.0270507  |           | 32.55391934    |        |
| 41.72585348                                 |                                                       |             |           |                |        |
| ENSG00000111731                             | 847.3724022                                           | 577.0168398 |           | 640.5328991    |        |
| 503.4806885                                 | 535.3596674                                           | 515.8581491 |           | 688.3073804    |        |
| 518.232835                                  | 0.409904204                                           | 0.046291375 |           | 0.203104429    | C2CD5  |
| 12                                          | 22448583                                              | 22544546    |           | - 6759         |        |
| protein_coding                              | C2 calcium dependent domain containing 5 [Source:HGNC |             |           |                |        |
| Symbol;Acc:HGNC:29062]                      |                                                       | -           | 934 652   | 551 486        | 469    |
| 598                                         | 6.766952271                                           | 4.570793384 |           | 5.071962093    |        |
| 3.99545153                                  | 4.265183854                                           | 4.113862346 |           |                |        |
| ENSG00000174238                             | 2367.925021                                           | 2510.731249 |           | 2405.195224    |        |
| 2806.438653                                 | 3126.546117                                           | 2788.912033 |           | 2427.950498    |        |
| 2907.298934                                 | -0.259686346                                          | 0.04629164  |           | 0.203104429    | PITPNA |
| 17                                          | 1517718 1562816                                       | -           | 4784      | protein_coding |        |
| phosphatidylinositol transfer protein alpha | [Source:HGNC                                          |             |           |                |        |
| Symbol;Acc:HGNC:9001]                       |                                                       | -           | 2610 2837 | 2069 2709      | 2739   |
| 3233                                        | 26.71640509                                           | 28.09924207 |           | 26.90767455    |        |
| 31.46515516                                 | 35.19234621                                           | 31.42284852 |           |                |        |
| ENSG00000156531                             | 2541.209956                                           | 2145.228251 |           | 2268.021209    |        |
| 2202.46902                                  | 1755.614432                                           | 1622.624044 |           | 2318.153139    |        |
| 1860.235832                                 | 0.317763226                                           | 0.046295272 |           | 0.203104429    | PHF6   |
| X                                           | 134373253                                             | 134428791   |           | + 8016         |        |
| protein_coding                              | PHD finger protein 6 [Source:HGNC                     |             |           |                |        |
| Symbol;Acc:HGNC:18145]                      |                                                       | -           | 2801 2424 | 1951 2126      | 1538   |
| 1881                                        | 17.11134249                                           | 14.32852045 |           | 15.14280771    |        |
| 14.73728884                                 | 11.79358896                                           | 10.91093843 |           |                |        |
| ENSG00000204592                             | 3520.133748                                           | 4091.332593 |           | 4937.102037    |        |
| 4258.866483                                 | 6003.105524                                           | 5522.615168 |           | 4182.856126    |        |
| 5261.529058                                 | -0.33123313                                           | 0.046344776 |           | 0.203228487    | HLA-E  |
| 6                                           | 30489467                                              | 30494205    |           | + 2975         |        |
| protein_coding                              | "major histocompatibility complex, class I, E         |             |           |                |        |
| [Source:HGNC Symbol;Acc:HGNC:4962]"         |                                                       | -           | 3880      | 4623           | 4247   |
| 4111                                        | 5259 6402                                             | 63.86654741 |           | 73.6314519     |        |
| 88.81823478                                 | 76.78432139                                           | 108.6584639 |           | 100.0598201    |        |
| ENSG00000141391                             | 150.6036604                                           | 179.6540161 |           | 179.0237141    |        |
| 62.15810969                                 | 115.2906746                                           | 127.6705787 |           | 169.7604635    |        |
| 101.7064543                                 | 0.737272939                                           | 0.046346527 |           | 0.203228487    |        |
| PRELID3A                                    | 18                                                    | 12407896    | 12432238  | +              | 2643   |
| protein_coding                              | PRELI domain containing 3A [Source:HGNC               |             |           |                |        |

|                                  |                        |                     |                     |             |      |              |      |
|----------------------------------|------------------------|---------------------|---------------------|-------------|------|--------------|------|
| Symbol;Acc:HGNC:24639]           | -                      | 166                 | 203                 | 154         | 60   | 101          |      |
| 148                              | 3.075669093            | 3.639362498         | 3.62518692          |             |      |              |      |
| 1.261438643                      | 2.348938092            | 2.603727742         |                     |             |      |              |      |
| ENSG00000273137                  | 12.70151352            | 17.69990306         | 11.6249165          |             |      |              |      |
| 17.61146441                      | 46.80116496            | 55.2088989          | 14.0087777          |             |      |              |      |
| 39.87384276                      | -1.506791158           | 0.046366068         | 0.203263788         |             |      |              |      |
| AL022328.2                       | 22                     | 50208461            | 50209542            | -           |      | 640          |      |
| antisense                        |                        | uncharacterized     | LOC105373095        |             |      | [Source:NCBI |      |
| gene;Acc:105373095]              | -                      | 14                  | 20                  | 10          | 17   | 41           |      |
| 64                               | 1.071215246            | 1.480732002         | 0.972135656         |             |      |              |      |
| 1.475981762                      | 3.937778133            | 4.64976515          |                     |             |      |              |      |
| ENSG00000166479                  | 2976.690419            | 2415.151773         | 2690.005678         |             |      |              |      |
| 2474.928734                      | 2177.966408            | 1879.69048          | 2693.94929          |             |      |              |      |
| 2177.528541                      | 0.30731637             | 0.046398161         | 0.203354081         |             |      | TMX3         |      |
| 18                               | 68673688               | 68715298            | -                   | 7637        |      |              |      |
| protein_coding                   | thioredoxin related    | transmembrane       | protein 3           |             |      |              |      |
| [Source:HGNC                     | Symbol;Acc:HGNC:24718] | -                   | 3281                | 2729        |      | 2314         |      |
| 2389                             | 1908                   | 2179                | 21.03837168         | 16.93195813 |      |              |      |
| 18.85156503                      | 17.38222642            | 15.35687821         | 13.26677787         |             |      |              |      |
| ENSG00000101138                  | 1320.050155            | 1283.242972         | 1479.85187          |             |      |              |      |
| 1530.125467                      | 1586.673641            | 1976.306053         | 1361.048333         |             |      |              |      |
| 1697.70172                       | -0.319850844           | 0.046445982         | 0.203513246         |             |      | CSTF1        |      |
| 20                               | 56392371               | 56406369            | +                   | 4800        |      |              |      |
| protein_coding                   | cleavage stimulation   | factor subunit 1    |                     |             |      |              |      |
| [Source:HGNC                     | Symbol;Acc:HGNC:2483]  | -                   | 1455                | 1450        | 1273 | 1477         | 1390 |
| 2291                             | 14.8439827             | 14.31374268         | 16.50038254         |             |      |              |      |
| 17.09823578                      | 17.80003774            | 22.19294158         |                     |             |      |              |      |
| ENSG00000134504                  | 380.1381547            | 305.3233278         | 421.9844689         |             |      |              |      |
| 199.9419195                      | 272.8165469            | 299.3357487         | 369.1486505         |             |      |              |      |
| 257.3647384                      | 0.518459105            | 0.046471339         | 0.203516152         |             |      | KCTD1        |      |
| 18                               | 26454910               | 26657401            | -                   | 8882        |      |              |      |
| protein_coding                   | potassium channel      | tetramerization     | domain containing 1 |             |      |              |      |
| [Source:HGNC                     | Symbol;Acc:HGNC:18249] | -                   | 419                 | 345         |      | 363          |      |
| 193                              | 239                    | 347                 | 2.310106157         | 1.84049553  |      |              |      |
| 2.542744378                      | 1.207420607            | 1.653996142         | 1.816559904         |             |      |              |      |
| ENSG00000241015                  | 63.50756762            | 84.9595347          | 36.03724115         |             |      |              |      |
| 121.2083139                      | 114.1491828            | 105.2419635         | 61.50144782         |             |      |              |      |
| 113.5331534                      | -0.877887261           | 0.046480331         | 0.203516152         |             |      | TPM3P9       |      |
| 19                               | 53431984               | 53444670            | +                   | 2920        |      |              |      |
| transcribed_processed_pseudogene |                        | tropomyosin 3       | pseudogene 9        |             |      |              |      |
| [Source:HGNC                     | Symbol;Acc:HGNC:44142] | -                   | 70                  | 96          |      | 31           |      |
| 117                              | 100                    | 122                 | 1.173934517         | 1.557811202 |      |              |      |
| 0.660519569                      | 2.226460804            | 2.105060145         | 1.942710097         |             |      |              |      |
| ENSG00000162636                  | 2216.41411             | 1500.95178          | 1943.686039         |             |      |              |      |
| 1783.937748                      | 1353.809308            | 1209.419941         | 1887.017309         |             |      |              |      |
| 1449.055666                      | 0.381149834            | 0.046481161         | 0.203516152         |             |      |              |      |
| FAM102B 1                        | 108560089              | 108644900           | +                   | 9355        |      |              |      |
| protein_coding                   | family with            | sequence similarity | 102 member B        |             |      |              |      |
| [Source:HGNC                     | Symbol;Acc:HGNC:27637] | -                   | 2443                | 1696        |      | 1672         |      |
| 1722                             | 1186                   | 1402                | 12.78816876         | 8.590303281 |      |              |      |

|                        |                                                 |             |                          |             |
|------------------------|-------------------------------------------------|-------------|--------------------------|-------------|
| 11.11986022            | 10.22825152                                     | 7.792705385 | 6.968434784              |             |
| ENSG00000181744        | 744.8530431                                     | 791.1856669 | 617.2830661              |             |
| 891.9688741            | 970.2680539                                     | 886.7929385 | 717.7739254              |             |
| 916.3432889            | -0.350958808                                    | 0.046591609 | 0.203949262              |             |
| C3orf58 3              | 143971798                                       | 144048719   | + 5487                   |             |
| protein_coding         | chromosome 3 open reading frame 58 [Source:HGNC |             |                          |             |
| Symbol;Acc:HGNC:28490] | -                                               | 821 894     | 531 861                  | 850         |
| 1028                   | 7.327180336                                     | 7.720207965 | 6.020969226              |             |
| 8.719272183            | 9.522069034                                     | 8.711424411 |                          |             |
| ENSG00000145354        | 1408.96075                                      | 1368.202507 | 1298.503173              |             |
| 1156.14084             | 1108.388565                                     | 1059.320748 | 1358.555477              |             |
| 1107.950051            | 0.294647462                                     | 0.046619198 | 0.203990158              | CISD2       |
| 4                      | 102868974                                       | 102892807   | + 6352                   |             |
| protein_coding         | CDGSH iron sulfur domain 2 [Source:HGNC         |             |                          |             |
| Symbol;Acc:HGNC:24212] | -                                               | 1553 1546   | 1117 1116                | 971         |
| 1228                   | 11.97263244                                     | 11.53255252 | 10.94081137              |             |
| 9.762605696            | 9.396283263                                     | 8.989155548 |                          |             |
| ENSG00000173226        | 706.7485025                                     | 661.0913794 | 517.3087842              |             |
| 742.7894108            | 897.2125769                                     | 820.3697321 | 628.3828887              |             |
| 820.1239066            | -0.382670075                                    | 0.046624015 | 0.203990158              | IQCB1       |
| 3                      | 121769763                                       | 121835079   | - 3049                   |             |
| protein_coding         | IQ motif containing B1 [Source:HGNC             |             |                          |             |
| Symbol;Acc:HGNC:28949] | -                                               | 779 747     | 445 717                  | 786         |
| 951                    | 12.51148089                                     | 11.60886119 | 9.08049311               |             |
| 13.06693633            | 15.8457384                                      | 14.50287523 |                          |             |
| ENSG00000141452        | 605.1363943                                     | 631.0015442 | 538.2336339              |             |
| 878.5012837            | 636.9524401                                     | 804.8422292 | 591.4571908              |             |
| 773.4319843            | -0.386866962                                    | 0.046668933 | 0.204136191              | RMC1        |
| 18                     | 23503470                                        | 23531807    | + 3090                   |             |
| protein_coding         | regulator of MON1-CCZ1 [Source:HGNC             |             |                          |             |
| Symbol;Acc:HGNC:24326] | -                                               | 667 713     | 463 848                  | 558         |
| 933                    | 10.57051235                                     | 10.93345675 | 9.322434876              |             |
| 15.24928273            | 11.10000258                                     | 14.03958215 |                          |             |
| ENSG00000234918        | 1.814501932                                     | 2.654985459 | 13.9498998               | 0           |
| 0                      | 0                                               | 6.13979573  | 0                        | 5.044135503 |
| 0.046708264            | 1                                               | AL157387.1  | 10                       | 37240887    |
| 37242049               | +                                               | 335         | lincRNA novel transcript | -           |
| 2                      | 3                                               | 12          | 0                        | 0           |
| 0.424329171            | 2.228657266                                     | 0           | 0                        | 0.292357253 |
| ENSG00000197483        | 430.0369579                                     | 438.0726008 | 490.5714763              |             |
| 469.2937282            | 633.5279646                                     | 734.9684666 | 452.8936783              |             |
| 612.5967198            | -0.43713578                                     | 0.046769194 | 0.20452417               | ZNF628      |
| 19                     | 55476332                                        | 55484487    | + 3851                   |             |
| protein_coding         | zinc finger protein 628 [Source:HGNC            |             |                          |             |
| Symbol;Acc:HGNC:28054] | zf-C2H2                                         | 474 495     | 422 453                  | 555         |
| 852                    | 6.027448476                                     | 6.090572555 | 6.817823891              |             |
| 6.53637149             | 8.858635342                                     | 10.28719789 |                          |             |
| ENSG00000181826        | 104.3338611                                     | 138.944239  | 113.9241817              |             |
| 72.51779464            | 57.07459141                                     | 77.63751407 | 119.0674273              |             |
| 69.07663338            | 0.783653527                                     | 0.046806072 | 0.204634852              | RELL1       |

|                                                                  |                                                     |                          |             |             |                |
|------------------------------------------------------------------|-----------------------------------------------------|--------------------------|-------------|-------------|----------------|
| 4                                                                | 37590800                                            | 37686376                 | -           | 1947        |                |
| protein_coding                                                   | REL1 like 1 [Source:HGNC Symbol;Acc:HGNC:27379]     |                          |             |             | -              |
| 115                                                              | 157                                                 | 98                       | 70          | 50          | 90             |
|                                                                  | 3.820851349                                         | 3.131604949              | 1.997763767 | 1.578524813 |                |
|                                                                  | 2.149352149                                         |                          |             |             |                |
| ENSG00000267583                                                  | 0                                                   | 10.61994184              | 10.46242485 | 0           | 0              |
| 0                                                                | 7.027455562                                         | 0                        | 5.244181981 | 0.046815284 |                |
| 1                                                                | AC007998.3                                          | 18                       | 35443869    | 35467088    |                |
| -                                                                | 916                                                 | lincRNA novel transcript |             | -           | 0              |
| 12                                                               | 9                                                   | 0                        | 0           | 0           | 0.620743547    |
|                                                                  | 0.611299277                                         | 0                        | 0           | 0           |                |
| ENSG00000272953                                                  | 6.350756762                                         | 5.309970919              | 5.812458249 | 0           |                |
| 0                                                                | 0                                                   | 5.82439531               | 0           | 4.975155751 |                |
| 0.046817765                                                      | 1                                                   | AC092171.4               | 7           | 5425770     | 5426401 +      |
|                                                                  | 632                                                 | lincRNA novel transcript |             | -           | 7 6            |
|                                                                  | 5                                                   | 0                        | 0           | 0.542387466 | 0.449842633    |
|                                                                  | 0.492220585                                         | 0                        | 0           | 0           |                |
| ENSG00000167723                                                  | 109.7773669                                         | 89.38451047              | 39.5247161  |             |                |
| 185.4383606                                                      | 168.9407906                                         | 92.30237784              | 79.56219781 |             |                |
| 148.893843                                                       | -0.89709127                                         | 0.046831258              | 0.204694373 |             | TRPV3          |
|                                                                  | 17                                                  | 3510502                  | 3557995 -   | 9780        | protein_coding |
| transient receptor potential cation channel subfamily V member 3 |                                                     |                          |             |             |                |
| [Source:HGNC Symbol;Acc:HGNC:18084]                              |                                                     |                          |             |             |                |
|                                                                  | 179                                                 | 148                      | 107         | 0.605864072 | 0.489338019    |
| 0.216295214                                                      | 1.017012334                                         | 0.930186904              | 0.508716637 |             | 34             |
| ENSG00000189299                                                  | 227.7199925                                         | 192.0439482              | 131.3615564 |             |                |
| 408.171587                                                       | 208.8930046                                         | 251.8906012              | 183.708499  |             |                |
| 289.6517309                                                      | -0.654623134                                        | 0.046870719              | 0.204783207 |             | FOXR2          |
|                                                                  | X                                                   | 55623400                 | 55625325    | +           | 1926           |
| protein_coding                                                   | forkhead box R2 [Source:HGNC Symbol;Acc:HGNC:30469] |                          |             |             |                |
| Fork                                                             | 251                                                 | 217                      | 113         | 394         | 183 292        |
| 6.381843093                                                      | 5.338630852                                         | 3.650303773              | 11.36716025 |             |                |
| 5.840394283                                                      | 7.049488182                                         |                          |             |             |                |
| ENSG00000101158                                                  | 3100.076551                                         | 3146.157769              | 3424.700401 |             |                |
| 2338.180893                                                      | 2918.794605                                         | 2724.214105              | 3223.644907 |             |                |
| 2660.396534                                                      | 0.276953636                                         | 0.046874736              | 0.204783207 |             | NELFCD         |
|                                                                  | 20                                                  | 58981208                 | 58995133    | +           | 6298           |
| protein_coding                                                   | negative elongation factor complex member C/D       |                          |             |             |                |
| [Source:HGNC Symbol;Acc:HGNC:15934]                              |                                                     |                          |             |             |                |
|                                                                  | 2257                                                | 2557                     | 3158        | 26.56874289 | 26.74628017    |
| 29.10294462                                                      | 19.91319499                                         | 24.95602614              | 23.31527206 |             |                |
| ENSG00000175536                                                  | 19.95952125                                         | 32.74482067              | 60.44956579 |             |                |
| 70.44585765                                                      | 66.20652603                                         | 103.5166854              | 37.71796924 |             |                |
| 80.05635637                                                      | -1.096533809                                        | 0.046888013              | 0.204790632 |             | LIPT2          |
|                                                                  | 11                                                  | 74491712                 | 74493733    | -           | 1187           |
| protein_coding                                                   | lipoyl(octanoyl) transferase 2 [Source:HGNC         |                          |             |             |                |
| Symbol;Acc:HGNC:37216]                                           |                                                     |                          |             |             |                |
|                                                                  | 120                                                 | 0.90761287               | 1.476989629 | 2.725583373 | 58             |
| 3.183246259                                                      | 3.003479242                                         | 4.700689284              |             |             |                |
| ENSG00000040633                                                  | 1352.71119                                          | 1614.231159              | 1614.700902 |             |                |

|                                                                                                                                 |              |                |                         |             |
|---------------------------------------------------------------------------------------------------------------------------------|--------------|----------------|-------------------------|-------------|
| 1493.86657                                                                                                                      | 2118.608833  | 2241.998879    | 1527.214417             |             |
| 1951.491427                                                                                                                     | -0.354039493 | 0.046917314    | 0.204868025             | PHF23       |
| 17                                                                                                                              | 7235028      | 7239722        | -                       | 2783        |
| finger protein 23 [Source:HGNC Symbol;Acc:HGNC:28428]                                                                           |              |                | protein_coding          | PHD         |
| 1824                                                                                                                            | 1389         | 1442           | 1856                    | 2599        |
| 31.05546729                                                                                                                     | 31.05245106  | 28.79148714    | 40.99322873             | 1491        |
| 43.42342661                                                                                                                     |              |                |                         |             |
| ENSG00000125817                                                                                                                 | 3411.263632  | 4187.797065    | 3780.422845             |             |
| 3760.565636                                                                                                                     | 4490.628852  | 6293.814474    | 3793.161181             |             |
| 4848.336321                                                                                                                     | -0.354329475 | 0.046940512    | 0.204885499             | CENPB       |
| 20                                                                                                                              | 3783851      | 3786690        | -                       | 2840        |
| centromere protein B [Source:HGNC Symbol;Acc:HGNC:1852]                                                                         |              |                | protein_coding          | 3760        |
| 4732                                                                                                                            | 3252         | 3630           | 3934                    | 7296        |
| 78.95012769                                                                                                                     | 71.24248235  | 71.02321517    | 85.14582851             |             |
| 119.4531216                                                                                                                     |              |                |                         |             |
| ENSG00000176974                                                                                                                 | 1116.825939  | 1062.879179    | 1177.604041             |             |
| 1121.95388                                                                                                                      | 765.9410167  | 614.1990002    | 1119.103053             |             |
| 834.031299                                                                                                                      | 0.424630821  | 0.046944481    | 0.204885499             | SHMT1       |
| 17                                                                                                                              | 18327860     | 18363563       | -                       | 7281        |
| protein_coding serine hydroxymethyltransferase 1 [Source:HGNC Symbol;Acc:HGNC:10850]                                            |              |                | 1231                    | 1201        |
| 712                                                                                                                             | 8.279339766  | 7.815889616    | 1013                    | 1083        |
| 8.26512582                                                                                                                      | 5.664725233  | 4.546947929    | 8.656159713             | 671         |
| ENSG00000170027                                                                                                                 | 8630.678439  | 9156.159854    | 9460.357047             |             |
| 9458.392358                                                                                                                     | 11096.44206  | 12015.69926    | 9082.398447             |             |
| 10856.84456                                                                                                                     | -0.257564464 | 0.047043002    | 0.205264842             | YWHAG       |
| 7                                                                                                                               | 76326794     | 76359031       | -                       | 3750        |
| protein_coding tyrosine 3-monooxygenase/tryptophan 5-monooxygenase activation protein gamma [Source:HGNC Symbol;Acc:HGNC:12852] |              |                |                         |             |
| 9513                                                                                                                            | 10346        | 8138           | 9130                    | 9721        |
| 130.7277081                                                                                                                     | 135.0184955  | 135.2855942    | 13929                   | 124.2266897 |
| 172.7108767                                                                                                                     |              |                | 159.3408155             |             |
| ENSG00000100024                                                                                                                 | 3.629003864  | 10.61994184    | 3.48747495              | 0           |
| 0                                                                                                                               | 0            | 5.912140217    | 0                       | 4.999471804 |
| 0.047077133                                                                                                                     | 1            | UPB1           | 22                      | 24494107    |
| +                                                                                                                               | 6793         | protein_coding | beta-ureidopropionase 1 | 24528390    |
| [Source:HGNC Symbol;Acc:HGNC:16297]                                                                                             |              |                | -                       | 4           |
| 0                                                                                                                               | 0            | 0              | 0.028835472             | 0.083703973 |
| 0.027476821                                                                                                                     | 0            | 0              | 0                       |             |
| ENSG00000197872                                                                                                                 | 80.74533597  | 85.84452985    | 115.0866733             |             |
| 73.55376314                                                                                                                     | 30.82027936  | 37.95611799    | 93.89217972             |             |
| 47.44338683                                                                                                                     | 0.982958982  | 0.047084222    | 0.205394033             | FAM49A      |
| 2                                                                                                                               | 16549459     | 16666331       | -                       | 5448        |
| protein_coding family with sequence similarity 49 member A [Source:HGNC Symbol;Acc:HGNC:25373]                                  |              |                | 89                      | 97          |
| 71                                                                                                                              | 27           | 44             | 0.799984535             | 0.843647602 |
| 1.130589486                                                                                                                     | 0.724157934  | 0.30463095     | 0.375531693             |             |
| ENSG00000184900                                                                                                                 | 4539.883834  | 4697.554273    | 4860.377588             |             |
| 4182.204814                                                                                                                     | 3981.523497  | 3754.205125    | 4699.271898             |             |
| 3972.644479                                                                                                                     | 0.24236416   | 0.047099678    | 0.2054108               | SUM03       |



|                          |                                 |                |                                |             |                        |
|--------------------------|---------------------------------|----------------|--------------------------------|-------------|------------------------|
| 21                       | 44805617                        | 44818779       | -                              | 2732        |                        |
| protein_coding           | small ubiquitin-like modifier 3 | [Source:HGNC   |                                |             |                        |
| Symbol;Acc:HGNC:11124]   | -                               | 5004           | 5308                           | 4181        | 4037                   |
| 4352                     | 89.69439184                     | 92.06120603    |                                | 95.21520771 | 3488                   |
| 82.1088743               | 78.47713532                     | 74.06946535    |                                |             |                        |
| ENSG00000144290          | 3.629003864                     | 1.769990306    |                                | 12.78740815 | 0                      |
| 0                        | 0                               | 6.062134106    | 0                              | 5.026481773 |                        |
| 0.047126718              | 1                               | SLC4A10        | 2                              | 161424332   | 161985282              |
| +                        | 7550                            | protein_coding | solute carrier family 4 member |             |                        |
| 10 [Source:HGNC          | Symbol;Acc:HGNC:13811]          | -              | 4                              | 2           | 11                     |
| 0                        | 0                               | 0              | 0.025944286                    | 0.0125519   |                        |
| 0.090646821              | 0                               | 0              | 0                              |             |                        |
| ENSG00000168280          | 359.2713825                     | 236.2937059    |                                | 238.3107882 |                        |
| 244.4885648              | 140.4034949                     | 154.4123891    |                                | 277.9586255 |                        |
| 179.7681496              | 0.629594181                     | 0.04713919     |                                | 0.205450453 | KIF5C                  |
| 2                        | 148875250                       | 149026759      | +                              | 9215        |                        |
| protein_coding           | kinesin family member 5C        | [Source:HGNC   |                                |             |                        |
| Symbol;Acc:HGNC:6325]    | -                               | 396            | 267                            | 205         | 236                    |
| 179                      | 2.104401147                     | 1.37291093     |                                | 1.384093306 | 123                    |
| 1.423078008              | 0.82045947                      | 0.903209942    |                                |             |                        |
| ENSG00000118503          | 310.2798304                     | 418.6027074    |                                | 415.009519  |                        |
| 416.459335               | 517.0957982                     | 656.4683135    |                                | 381.2973523 |                        |
| 530.0078155              | -0.476677375                    | 0.047141825    |                                | 0.205450453 |                        |
| TNFAIP3                  | 6                               | 137867188      | 137883312                      | +           | 5051                   |
| protein_coding           | TNF alpha induced protein 3     | [Source:HGNC   |                                |             |                        |
| Symbol;Acc:HGNC:11896]   | -                               | 342            | 473                            | 357         | 402                    |
| 761                      | 3.315716734                     | 4.43721235     |                                | 4.397417437 | 453                    |
| 4.422427564              | 5.512748677                     | 7.005486595    |                                |             |                        |
| ENSG00000214826          | 351.1061238                     | 303.5533375    |                                | 99.97428189 |                        |
| 116.0284714              | 154.1013968                     | 163.9014186    |                                | 251.5445811 |                        |
| 144.6770956              | 0.800123069                     | 0.047148129    |                                | 0.205450453 | DDX12P                 |
| 12                       | 9418673                         | 9448229        | -                              | 2947        | unprocessed_pseudogene |
| "DEAD/H-box helicase 12, | pseudogene                      | [Source:HGNC   |                                |             |                        |
| Symbol;Acc:HGNC:2737]"   | -                               | 387            | 343                            | 86          | 112                    |
| 190                      | 6.430718702                     | 5.514935341    |                                | 1.815620853 | 135                    |
| 2.111786117              | 2.815794737                     | 2.997812618    |                                |             |                        |
| ENSG00000203705          | 199.5952125                     | 175.2290403    |                                | 194.1361055 |                        |
| 250.7043758              | 269.3920714                     | 293.2972754    |                                | 189.6534528 |                        |
| 271.1312409              | -0.516571874                    | 0.047172932    |                                | 0.205450453 | TATDN3                 |
| 1                        | 212791828                       | 212816626      | +                              | 3788        |                        |
| protein_coding           | TatD DNase domain containing 3  | [Source:HGNC   |                                |             |                        |
| Symbol;Acc:HGNC:27010]   | -                               | 220            | 198                            | 167         | 242                    |
| 340                      | 2.844077287                     | 2.476747086    |                                | 2.742921303 | 236                    |
| 3.54991079               | 3.829564537                     | 4.173495647    |                                |             |                        |
| ENSG00000196943          | 556.1448421                     | 661.9763745    |                                | 664.9452237 |                        |
| 682.7032381              | 723.7058191                     | 1155.073682    |                                | 627.6888135 |                        |
| 853.8275796              | -0.445392747                    | 0.047174634    |                                | 0.205450453 | NOP9                   |
| 14                       | 24299862                        | 24309124       | +                              | 6033        |                        |
| protein_coding           | NOP9 nucleolar protein          | [Source:HGNC   |                                |             |                        |
| Symbol;Acc:HGNC:19826]   | -                               | 613            | 748                            | 572         | 659                    |
|                          |                                 |                |                                |             | 634                    |

|                                                                                           |                                                                       |             |                 |               |
|-------------------------------------------------------------------------------------------|-----------------------------------------------------------------------|-------------|-----------------|---------------|
| 1339                                                                                      | 4.975718849                                                           | 5.874822011 | 5.898879845     |               |
| 6.069656768                                                                               | 6.459565298                                                           | 10.31996608 |                 |               |
| ENSG00000172409                                                                           | 501.7097842                                                           | 708.8811176 | 634.7204408     |               |
| 798.7317096                                                                               | 690.602556                                                            | 960.1172574 | 615.1037809     |               |
| 816.483841                                                                                | -0.40961561                                                           | 0.047185786 | 0.205450453     | CLP1          |
| 11                                                                                        | 57648992                                                              | 57661868    | + 2793          |               |
| protein_coding                                                                            | cleavage and polyadenylation factor I subunit 1                       |             |                 |               |
| [Source:HGNC Symbol;Acc:HGNC:16999]                                                       |                                                                       | -           | 553 801         | 546           |
| 771                                                                                       | 605 1113                                                              | 9.695782824 | 13.58901635     |               |
| 12.16265964                                                                               | 15.33894485                                                           | 13.31471268 | 18.52913932     |               |
| ENSG00000186395                                                                           | 637.7974291                                                           | 868.1802452 | 768.4069806     |               |
| 519.0202159                                                                               | 638.0939319                                                           | 579.6934384 | 758.1282183     |               |
| 578.9358621                                                                               | 0.389344483                                                           | 0.047190072 | 0.205450453     | KRT10         |
| 17                                                                                        | 40818117                                                              | 40822595    | - 2144          |               |
| protein_coding                                                                            | keratin 10 [Source:HGNC Symbol;Acc:HGNC:6413]                         |             |                 | -             |
| 703                                                                                       | 981 661                                                               | 501 559     | 672 16.05680849 |               |
| 21.68056856                                                                               | 19.18154235                                                           | 12.98449276 | 16.02634129     |               |
| 14.57389077                                                                               |                                                                       |             |                 |               |
| ENSG00000251495                                                                           | 12.70151352                                                           | 20.35488852 | 18.5998664      |               |
| 4.14387398                                                                                | 2.282983656                                                           | 4.313195226 | 17.21875615     |               |
| 3.580017621                                                                               | 2.256028851                                                           | 0.047223275 | 0.205544418     |               |
| PPIAP11 5                                                                                 | 82009602                                                              | 82010094    | - 493           |               |
| processed_pseudogene                                                                      | peptidylprolyl isomerase A pseudogene 11                              |             |                 |               |
| [Source:HGNC Symbol;Acc:HGNC:9263]                                                        |                                                                       | -           | 14 23           | 16            |
| 4                                                                                         | 2 5                                                                   | 1.390624255 | 2.210585706     |               |
| 2.019202661                                                                               | 0.450842776                                                           | 0.249362094 | 0.471578616     |               |
| ENSG00000107816                                                                           | 1142.228966                                                           | 1103.588956 | 1351.977789     |               |
| 949.9831098                                                                               | 741.9696883                                                           | 1089.513114 | 1199.265237     |               |
| 927.1553041                                                                               | 0.369657462                                                           | 0.047315654 | 0.205895842     | LZTS2         |
| 10                                                                                        | 100996618                                                             | 101007836   | + 6547          |               |
| protein_coding                                                                            | leucine zipper tumor suppressor 2 [Source:HGNC Symbol;Acc:HGNC:29381] |             |                 | -             |
| 1263                                                                                      | 9.416989209                                                           | 9.025069467 | 1163 917        | 650           |
| 7.782856776                                                                               | 6.102648777                                                           | 8.969991423 |                 |               |
| ENSG00000167977                                                                           | 1032.451599                                                           | 1128.36882  | 1003.230294     |               |
| 1040.112369                                                                               | 1296.734717                                                           | 1850.360752 | 1054.683571     |               |
| 1395.735946                                                                               | -0.404742012                                                          | 0.047363507 | 0.20605339      | KCTD5         |
| 16                                                                                        | 2682475 2709030                                                       | + 3420      | protein_coding  |               |
| potassium channel tetramerization domain containing 5 [Source:HGNC Symbol;Acc:HGNC:21423] |                                                                       | -           | 1138 1275       | 863 1004 1136 |
| 2145                                                                                      | 16.29464261                                                           | 17.664873   | 15.6997066      |               |
| 16.31246716                                                                               | 20.41735996                                                           | 29.16300072 |                 |               |
| ENSG00000138449                                                                           | 9.07250966                                                            | 15.0449176  | 8.137441549     | 0             |
| 0                                                                                         | 2.587917136                                                           | 10.75162294 | 0.862639045     |               |
| 3.557707015                                                                               | 0.047391874                                                           | 0.206126102 | SLC40A1 2       |               |
| 189560579                                                                                 | 189583758                                                             | - 4330      | protein_coding  | solute        |
| carrier family 40 member 1 [Source:HGNC Symbol;Acc:HGNC:10909]                            |                                                                       | -           |                 |               |
| 10                                                                                        | 17 7                                                                  | 0 0         | 3 0.113094318   |               |
| 0.186031919                                                                               | 0.100581241                                                           | 0           | 0 0.032215463   |               |
| ENSG00000258458                                                                           | 8.165258694                                                           | 3.539980612 | 5.812458249     | 0             |

|                                 |                                |                                    |                              |             |                     |      |
|---------------------------------|--------------------------------|------------------------------------|------------------------------|-------------|---------------------|------|
| 0                               | 0                              | 5.839232519                        | 0                            | 4.978685301 |                     |      |
| 0.047395402                     | 1                              | AL160314.2                         | 14                           | 22701476    |                     |      |
| 22766562                        | -                              | 2513                               | processed_transcript         | "novel      |                     |      |
| transcript, antisense to OXA1L" | -                              | 9                                  | 4                            | 5           | 0                   |      |
| 0                               | 0                              | 0.17537945                         | 0.075421288                  | 0.123789658 |                     |      |
| 0                               | 0                              | 0                                  |                              |             |                     |      |
| ENSG00000237276                 | 4.53625483                     | 7.079961225                        | 5.812458249                  | 0           |                     |      |
| 0                               | 0                              | 5.809558101                        | 0                            | 4.971618688 |                     |      |
| 0.047439019                     | 1                              | AN07L1                             | 1                            | 16215909    | 16228027            |      |
| -                               | 1990                           | transcribed_unprocessed_pseudogene |                              |             |                     |      |
| anoctamin 7 like 1              | [Source:HGNC                   | Symbol;Acc:HGNC:32248]             | -                            | 5           |                     |      |
| 8                               | 5                              | 0                                  | 0                            | 0.123039799 |                     |      |
| 0.190486127                     | 0.156323322                    | 0                                  | 0                            | 0           |                     |      |
| ENSG00000108523                 | 1711.982573                    | 1886.809666                        | 1712.3502                    |             |                     |      |
| 1860.599417                     | 2285.26664                     | 2388.647516                        | 1770.380813                  |             |                     |      |
| 2178.171191                     | -0.299052873                   | 0.047458985                        | 0.206258222                  | RNF167      |                     |      |
| 17                              | 4940008                        | 4945222                            | +                            | 2744        | protein_coding ring |      |
| finger protein 167              | [Source:HGNC                   | Symbol;Acc:HGNC:24544]             | -                            | 1887        |                     |      |
| 2132                            | 1473                           | 1796                               | 2002                         | 2769        | 33.67568796         |      |
| 36.81540091                     | 33.39838651                    | 36.36924361                        | 44.84637316                  |             |                     |      |
| 46.92128171                     |                                |                                    |                              |             |                     |      |
| ENSG00000149257                 | 7356.898083                    | 7846.367028                        | 9628.918336                  |             |                     |      |
| 6445.795975                     | 7089.805745                    | 7038.27197                         | 8277.394482                  |             |                     |      |
| 6857.957897                     | 0.27120781                     | 0.047460282                        | 0.206258222                  |             |                     |      |
| SERPINH1                        | 11                             | 75562056                           | 75572783                     | +           | 6281                |      |
| protein_coding                  | serpin family H member 1       | [Source:HGNC                       | Symbol;Acc:HGNC:1546]        | -           | 8109                | 8866 |
| 8159                            | 63.22184862                    | 66.88448299                        | 8283                         | 6222        | 6211                |      |
| 55.04441456                     | 60.78271515                    | 60.40030864                        |                              |             |                     |      |
| ENSG00000260528                 | 1.814501932                    | 0                                  | 0                            | 1.035968495 | 0                   |      |
| 36.2308399                      | 0.604833977                    | 12.42226947                        | -4.326109898                 |             |                     |      |
| 0.047469484                     | 0.206258222                    | FAM157C                            | 16                           | 90102271    |                     |      |
| 90178344                        | +                              | 4524                               | lincRNA family with sequence |             |                     |      |
| similarity 157 member C         | [Source:HGNC                   | Symbol;Acc:HGNC:34081]             | -                            |             |                     |      |
| 2                               | 0                              | 0                                  | 1                            | 0           | 42                  |      |
| 0                               | 0                              | 0.012282576                        | 0                            | 0.43167581  | 0.021648912         |      |
| ENSG00000196358                 | 282.1550504                    | 153.9891566                        | 168.5612892                  |             |                     |      |
| 158.5031797                     | 86.75337894                    | 119.9068273                        | 201.5684988                  |             |                     |      |
| 121.7211287                     | 0.727505288                    | 0.04747233                         | 0.206258222                  | NTNG2       |                     |      |
| 9                               | 132161676                      | 132244534                          | +                            | 7845        |                     |      |
| protein_coding                  | netrin G2                      | [Source:HGNC                       | Symbol;Acc:HGNC:14288]       | -           |                     |      |
| 311                             | 174                            | 145                                | 153                          | 76          | 139                 |      |
| 1.050951662                     | 1.149957794                    | 1.083703626                        | 0.595481131                  |             |                     |      |
| 0.823858962                     |                                |                                    |                              |             |                     |      |
| ENSG00000172986                 | 368.3438922                    | 266.3835411                        | 353.3974616                  |             |                     |      |
| 290.0711786                     | 215.7419555                    | 156.1376672                        | 329.3749649                  |             |                     |      |
| 220.6502671                     | 0.579130386                    | 0.047480552                        | 0.206258222                  | GXYLT2      |                     |      |
| 3                               | 72888073                       | 72998138                           | +                            | 3667        |                     |      |
| protein_coding                  | glucoside xylosyltransferase 2 | [Source:HGNC                       | Symbol;Acc:HGNC:33383]       | -           | 406                 | 301  |
|                                 |                                |                                    | 304                          | 280         | 189                 |      |

|                             |                                              |                                             |              |             |                |
|-----------------------------|----------------------------------------------|---------------------------------------------|--------------|-------------|----------------|
| 181                         | 5.421803919                                  | 3.889394775                                 | 5.157859648  |             |                |
| 4.242864526                 | 3.168095426                                  | 2.295084516                                 |              |             |                |
| ENSG00000163138             | 441.8312204                                  | 447.8075475                                 | 412.6845357  |             |                |
| 626.7609394                 | 697.451507                                   | 444.2591083                                 | 434.1077679  |             |                |
| 589.4905182                 | -0.439563041                                 | 0.047544072                                 | 0.206483451  | PACRGL      |                |
| 4                           | 20696282                                     | 20752907                                    | + 4032       |             |                |
| protein_coding              | parkin coregulated like [Source:HGNC         |                                             |              |             |                |
| Symbol;Acc:HGNC:28442]      | -                                            | 487                                         | 506          | 355         | 605 611        |
| 515                         | 5.91475992                                   | 5.94643169                                  | 5.47790727   |             |                |
| 8.337712099                 | 9.314682304                                  | 5.939060149                                 |              |             |                |
| ENSG00000248664             | 2.721752898                                  | 0                                           | 1.16249165   | 5.179842475 |                |
| 6.848950969                 | 24.15389327                                  | 1.294748183                                 | 12.06089557  |             |                |
| -3.224876303                | 0.047565292                                  | 0.2065249                                   | AC010273.1   |             |                |
| 5                           | 69113112                                     | 69136394                                    | -            | 946         |                |
| antisense                   | novel transcript                             |                                             |              |             |                |
| 5                           | 6                                            | 28                                          | 0.155295475  | 0           | 0.065768163    |
| 0.293691185                 | 0.389858919                                  | 1.376251841                                 |              |             |                |
| ENSG00000243746             | 0                                            | 0                                           | 5.179842475  | 0           |                |
| 15.52750281                 | 0                                            | 6.90244843                                  | -5.268269941 | 0.047574522 |                |
| 1                           | EEF1A1P10                                    | 7                                           | 144647186    | 144648575   |                |
| -                           | 1390                                         | processed_pseudogene eukaryotic translation |              |             |                |
| elongation factor 1 alpha 1 | pseudogene 10 [Source:HGNC                   |                                             |              |             |                |
| Symbol;Acc:HGNC:3205]       | -                                            | 0                                           | 0            | 0           | 5 0            |
| 18                          | 0                                            | 0                                           | 0.199879037  | 0           |                |
| 0.602127861                 |                                              |                                             |              |             |                |
| ENSG00000198093             | 149.6964094                                  | 143.3692148                                 | 185.998664   |             |                |
| 256.9201867                 | 238.5717921                                  | 212.2092051                                 | 159.6880961  |             |                |
| 235.9003947                 | -0.564487062                                 | 0.047584717                                 | 0.206558542  | ZNF649      |                |
| 19                          | 51889224                                     | 51905040                                    | -            | 4365        |                |
| protein_coding              | zinc finger protein 649 [Source:HGNC         |                                             |              |             |                |
| Symbol;Acc:HGNC:25741]      | zf-C2H2                                      | 165                                         | 162          | 160         | 248 209        |
| 246                         | 1.851093602                                  | 1.758560068                                 | 2.280565663  |             |                |
| 3.15703558                  | 2.943129679                                  | 2.620486201                                 |              |             |                |
| ENSG00000184500             | 917.2307266                                  | 850.4803421                                 | 704.4699398  |             |                |
| 814.271237                  | 526.2277328                                  | 463.2371673                                 | 824.0603362  |             |                |
| 601.245379                  | 0.455934355                                  | 0.047696271                                 | 0.206980341  | PROS1       |                |
| 3                           | 93873033                                     | 93980003                                    | -            | 5444        |                |
| protein_coding              | protein S [Source:HGNC Symbol;Acc:HGNC:9456] |                                             |              |             |                |
| 1011                        | 961                                          | 606                                         | 786          | 461         | 537 9.09414182 |
| 8.364340653                 | 6.925662986                                  | 8.022624642                                 | 5.205113082  |             |                |
| 4.586561142                 |                                              |                                             |              |             |                |
| ENSG00000267871             | 12.70151352                                  | 30.08983521                                 | 29.06229125  | 0           |                |
| 9.131934625                 | 6.038473317                                  | 23.95121333                                 | 5.056802647  |             |                |
| 2.247198869                 | 0.047707292                                  | 0.206980341                                 | ZNF460-AS1   |             |                |
| 19                          | 57267220                                     | 57280334                                    | -            | 738         |                |
| antisense                   | ZNF460 antisense RNA 1 [Source:HGNC          |                                             |              |             |                |
| Symbol;Acc:HGNC:53774]      | -                                            | 14                                          | 34           | 25          | 0 8            |
| 7                           | 0.928967151                                  | 2.182976176                                 | 2.107611179  | 0           |                |
| 0.666317141                 | 0.441034635                                  |                                             |              |             |                |
| ENSG00000135047             | 738.5022863                                  | 848.7103518                                 | 1059.029893  |             |                |

|                                    |                                                 |             |                          |             |
|------------------------------------|-------------------------------------------------|-------------|--------------------------|-------------|
| 708.6024505                        | 635.8109483                                     | 690.9738753 | 882.0808437              |             |
| 678.4624247                        | 0.377289765                                     | 0.04771699  | 0.206980341              | CTSL        |
| 9                                  | 87725519                                        | 87731393    | +                        | 2366        |
| protein_coding                     | cathepsin L [Source:HGNC Symbol;Acc:HGNC:2537]  |             |                          | -           |
| 814                                | 959                                             | 911         | 684                      | 557         |
| 19.20570738                        | 23.95578922                                     | 16.06398926 | 14.47064253              |             |
| 15.74159715                        |                                                 |             |                          |             |
| ENSG00000267731                    | 9.07250966                                      | 1.769990306 | 6.974949899              | 0           |
| 0                                  | 0                                               | 5.939149955 | 0                        | 5.002015236 |
| 0.047772605                        | 1                                               | AC005332.2  | 17                       | 68189884    |
| 68192802                           | +                                               | 2919        | lincRNA novel transcript | -           |
| 10                                 | 2                                               | 6           | 0                        | 0           |
| 0.032465518                        | 0.127886294                                     | 0           | 0                        | 0.167762384 |
| ENSG00000001630                    | 116.1281236                                     | 107.0844135 | 217.3859385              |             |
| 106.704755                         | 83.32890346                                     | 15.52750281 | 146.8661586              |             |
| 68.52038708                        | 1.102863394                                     | 0.047823929 | 0.207393351              |             |
| CYP51A1 7                          | 92112151                                        | 92134803    | -                        | 3584        |
| protein_coding                     | cytochrome P450 family 51 subfamily A member 1  |             |                          |             |
| [Source:HGNC Symbol;Acc:HGNC:2649] | -                                               |             | 128                      | 121         |
| 103                                | 73                                              | 18          | 1.748922851              | 1.599719395 |
| 3.24623871                         | 1.59691304                                      | 1.251993919 | 0.233526152              |             |
| ENSG00000175643                    | 269.4535369                                     | 390.2828625 | 351.0724783              |             |
| 297.322958                         | 189.4876435                                     | 201.8575366 | 336.9362926              |             |
| 229.556046                         | 0.553553798                                     | 0.047836141 | 0.207395465              | RMI2        |
| 16                                 | 11249619                                        | 11381662    | +                        | 3632        |
| protein_coding                     | RecQ mediated genome instability 2 [Source:HGNC |             |                          |             |
| Symbol;Acc:HGNC:28349]             | -                                               | 297         | 441                      | 302         |
| 234                                | 4.004416969                                     | 5.753328747 | 5.173303405              | 287         |
| 4.39084494                         | 2.809374321                                     | 2.995718736 |                          | 166         |
| ENSG00000076321                    | 655.9424484                                     | 675.2513018 | 577.75835                |             |
| 865.0336932                        | 1018.210711                                     | 648.704562  | 636.3173667              |             |
| 843.9829887                        | -0.405680858                                    | 0.047859054 | 0.207411153              | KLHL20      |
| 1                                  | 173714941                                       | 173786702   | +                        | 4254        |
| protein_coding                     | kelch like family member 20 [Source:HGNC        |             |                          |             |
| Symbol;Acc:HGNC:25056]             | -                                               | 723         | 763                      | 497         |
| 752                                | 8.322800705                                     | 8.498719453 | 7.268850718              | 835         |
| 10.90689252                        | 12.88886661                                     | 8.219613053 |                          | 892         |
| ENSG00000205268                    | 558.866595                                      | 515.0671791 | 519.6337675              |             |
| 457.8980747                        | 413.2200418                                     | 307.0995001 | 531.1891806              |             |
| 392.7392056                        | 0.437282402                                     | 0.047869377 | 0.207411153              | PDE7A       |
| 8                                  | 65717510                                        | 65842322    | -                        | 7425        |
| protein_coding                     | phosphodiesterase 7A [Source:HGNC               |             |                          |             |
| Symbol;Acc:HGNC:8791]              | -                                               | 616         | 582                      | 447         |
| 356                                | 4.062683008                                     | 3.714094653 | 3.745569947              | 442         |
| 3.307789429                        | 2.996811818                                     | 2.229382348 |                          | 362         |
| ENSG00000204227                    | 958.964271                                      | 1236.338229 | 1163.654142              |             |
| 1205.867328                        | 1518.184131                                     | 1530.321666 | 1119.652214              |             |
| 1418.124375                        | -0.341187384                                    | 0.047874969 | 0.207411153              | RING1       |
| 6                                  | 33208495                                        | 33212722    | +                        | 1818        |
| protein_coding                     | ring finger protein 1 [Source:HGNC              |             |                          |             |

|                                                                 |              |             |             |             |                |       |
|-----------------------------------------------------------------|--------------|-------------|-------------|-------------|----------------|-------|
| Symbol;Acc:HGNC:10018]                                          | -            | 1057        | 1397        | 1001        | 1164           | 1330  |
| 1774                                                            | 28.47146353  | 36.41069494 | 34.25681996 |             |                |       |
| 35.5771492                                                      | 44.96816049  | 45.3722958  |             |             |                |       |
| ENSG00000166337                                                 | 219.5547338  | 322.1382357 | 231.3358383 |             |                |       |
| 103.5968495                                                     | 219.166431   | 167.3519748 | 257.6762693 |             |                |       |
| 163.3717518                                                     | 0.659285365  | 0.047895094 | 0.207411153 |             |                | TAF10 |
| 11                                                              | 6606296      | 6612667     | -           | 6103        | protein_coding | TATA- |
| box binding protein associated factor 10 [Source:HGNC           |              |             |             |             |                |       |
| Symbol;Acc:HGNC:11543]                                          | -            | 242         | 364         | 199         | 100            | 192   |
| 194                                                             | 1.941782933  | 2.826080019 | 2.028694039 |             |                |       |
| 0.910476359                                                     | 1.933771783  | 1.478050859 |             |             |                |       |
| ENSG00000087301                                                 | 118.8498765  | 72.56960256 | 156.9363727 |             |                |       |
| 95.30910153                                                     | 28.5372957   | 48.30778654 | 116.1186173 |             |                |       |
| 57.38472792                                                     | 1.013600131  | 0.047905957 | 0.207411153 |             |                |       |
| TXNDC16                                                         | 14           | 52430590    | 52552522    | -           | 4739           |       |
| protein_coding thioredoxin domain containing 16 [Source:HGNC    |              |             |             |             |                |       |
| Symbol;Acc:HGNC:19965]                                          | -            | 131         | 82          | 135         | 92             | 25    |
| 56                                                              | 1.353671453  | 0.819886215 | 1.772368025 |             |                |       |
| 1.078731007                                                     | 0.324265437  | 0.549455261 |             |             |                |       |
| ENSG00000140451                                                 | 308.4653284  | 287.6234248 | 261.5606212 |             |                |       |
| 68.37392066                                                     | 35.38624667  | 0           | 285.8831248 | 34.58672245 |                |       |
|                                                                 | 3.048562085  | 0.047918039 | 0.207411153 | PIF1        | 15             |       |
|                                                                 | 64815632     | 64825668    | -           | 4656        | protein_coding |       |
| PIF1 5'-to-3' DNA helicase [Source:HGNC Symbol;Acc:HGNC:26220]  |              |             |             |             |                |       |
| -                                                               | 340          | 325         | 225         | 66          | 31             | 0     |
| 3.575976276                                                     | 3.30747698   | 3.006605123 | 0.787667647 |             |                |       |
| 0.409256968                                                     | 0            |             |             |             |                |       |
| ENSG00000135116                                                 | 8.165258694  | 0           | 0           | 5.179842475 |                |       |
| 7.990442797                                                     | 50.89570367  | 2.721752898 |             |             |                |       |
| 21.35532965                                                     | -2.954473179 | 0.047921837 | 0.207411153 |             |                | HRK   |
| 12                                                              | 116856144    | 116881441   | -           | 6853        |                |       |
| protein_coding "harakiri, BCL2 interacting protein [Source:HGNC |              |             |             |             |                |       |
| Symbol;Acc:HGNC:5185]"                                          | -            | 9           | 0           | 0           | 5              | 7     |
| 59                                                              | 0.06431177   | 0           | 0           | 0.04054164  |                |       |
| 0.062786268                                                     | 0.4003154    |             |             |             |                |       |
| ENSG00000244754                                                 | 1499.685847  | 1587.681305 | 1272.928357 |             |                |       |
| 1805.693087                                                     | 1834.377368  | 1716.6517   | 1453.431836 |             |                |       |
| 1785.574052                                                     | -0.296078052 | 0.04796485  | 0.207546535 |             |                |       |
| N4BP2L2                                                         | 13           | 32432417    | 32538885    | -           | 16960          |       |
| protein_coding NEDD4 binding protein 2 like 2 [Source:HGNC      |              |             |             |             |                |       |
| Symbol;Acc:HGNC:26916]                                          | -            | 1653        | 1794        | 1095        | 1743           | 1607  |
| 1990                                                            | 4.77282696   | 5.012138134 | 4.016937901 |             |                |       |
| 5.710624219                                                     | 5.824214873  | 5.455797552 |             |             |                |       |
| ENSG00000229334                                                 | 4.53625483   | 15.92991276 | 19.76235805 |             |                |       |
| 4.14387398                                                      | 0            | 0           | 13.40950854 | 1.381291327 |                |       |
| 3.288721285                                                     | 0.048021789  | 0.207742094 | AC046143.1  |             |                | 3     |
|                                                                 | 194632923    | 194645401   | +           | 972         | antisense      |       |
| novel transcript                                                |              |             |             |             |                |       |
| 0                                                               | 0            | 0.251902468 | 0.877470816 | 18          | 17             | 4     |
| 0.228668198                                                     | 0            | 0           | 1.088151846 |             |                |       |

|                                     |                                                   |                                       |              |                         |             |
|-------------------------------------|---------------------------------------------------|---------------------------------------|--------------|-------------------------|-------------|
| ENSG00000172572                     | 103.4266101                                       | 46.01974796                           | 161.5863393  |                         |             |
| 87.02135357                         | 19.40536108                                       | 4.313195226                           | 103.6775658  |                         |             |
| 36.91330329                         | 1.491364086                                       | 0.04810551                            | 0.208053392  | PDE3A                   |             |
| 12                                  | 20369245                                          | 20684381                              | +            | 8398                    |             |
| protein_coding                      | phosphodiesterase 3A [Source:HGNC                 |                                       |              |                         |             |
| Symbol;Acc:HGNC:8778]               | -                                                 | 114                                   | 52           | 139                     | 84 17       |
| 5                                   | 0.664748957                                       | 0.293395815                           | 1.029783139  |                         |             |
| 0.555796054                         | 0.124428656                                       | 0.027683765                           |              |                         |             |
| ENSG00000225362                     | 0                                                 | 0                                     | 0            | 13.69790194             |             |
| 6.901112362                         | 0                                                 | 6.8663381                             | -5.253599313 | 0.048107003             |             |
| 1                                   | CT62                                              | 15                                    | 71110244     | 71115500                | -           |
| 2855                                | protein_coding                                    | cancer/testis antigen 62 [Source:HGNC |              |                         |             |
| Symbol;Acc:HGNC:27286]              | -                                                 | 0                                     | 0            | 0                       | 0 12        |
| 8                                   | 0                                                 | 0                                     | 0            | 0                       | 0.258358345 |
| 0.130291143                         |                                                   |                                       |              |                         |             |
| ENSG00000155093                     | 727.6152747                                       | 682.3312631                           | 631.2329659  |                         |             |
| 632.9767504                         | 465.7286659                                       | 438.220635                            | 680.3931679  |                         |             |
| 512.3086838                         | 0.410250243                                       | 0.048123502                           | 0.208080329  | PTPRN2                  |             |
| 7                                   | 157539056                                         | 158587788                             | -            | 4833                    |             |
| protein_coding                      | "protein tyrosine phosphatase, receptor type N2   |                                       |              |                         |             |
| [Source:HGNC Symbol;Acc:HGNC:9677]" | -                                                 |                                       | 802          | 771                     | 543         |
| 611                                 | 408                                               | 508                                   | 8.126176608  | 7.558994402             |             |
| 6.990204496                         | 7.024840351                                       | 5.189084324                           | 4.887400571  |                         |             |
| ENSG0000046651                      | 444.5529733                                       | 380.5479158                           | 326.6601536  |                         |             |
| 544.9194283                         | 431.483911                                        | 592.6330241                           | 383.9203476  |                         |             |
| 523.0121212                         | -0.445815363                                      | 0.048147904                           | 0.208134962  | OFD1                    |             |
| X                                   | 13734745                                          | 13769353                              | +            | 5172                    |             |
| protein_coding                      | "OFD1, centriole and centriolar satellite protein |                                       |              |                         |             |
| [Source:HGNC Symbol;Acc:HGNC:2567]" | -                                                 |                                       | 490          | 430                     | 281         |
| 526                                 | 378                                               | 687                                   | 4.639447316  | 3.939457143             |             |
| 3.380295368                         | 5.651181705                                       | 4.492423018                           | 6.176312177  |                         |             |
| ENSG00000170889                     | 11984.78526                                       | 16443.20994                           | 17790.77221  |                         |             |
| 16432.53227                         | 20058.2944                                        | 20979.38158                           | 15406.25581  |                         |             |
| 19156.73608                         | -0.31441649                                       | 0.048181923                           | 0.208231134  | RPS9                    |             |
| 19                                  | 54200742                                          | 54249003                              | +            | 4371                    |             |
| protein_coding                      | ribosomal protein S9 [Source:HGNC                 |                                       |              |                         |             |
| Symbol;Acc:HGNC:10442]              | -                                                 | 13210                                 | 18580        | 15304                   | 15862 17572 |
| 24320                               | 147.9962444                                       | 201.4147836                           | 217.8366739  |                         |             |
| 201.6458009                         | 247.1085363                                       | 258.7103373                           |              |                         |             |
| ENSG00000233509                     | 3.629003864                                       | 7.964956378                           | 5.812458249  | 0                       |             |
| 0                                   | 0                                                 | 5.802139497                           | 0            | 4.969845596             |             |
| 0.048204494                         | 1                                                 | ZNF197-AS1                            | 3            | 44617128                |             |
| 44624797                            | -                                                 | 623                                   | antisense    | ZNF197 antisense RNA 1  |             |
| [Source:HGNC Symbol;Acc:HGNC:40620] | -                                                 |                                       | 4            | 9                       | 5           |
| 0                                   | 0                                                 | 0                                     | 0.314413097  | 0.684511744             |             |
| 0.499331316                         | 0                                                 | 0                                     | 0            |                         |             |
| ENSG00000210107                     | 19.95952125                                       | 14.15992245                           | 0            | 41.4387398              |             |
| 29.67878753                         | 51.75834272                                       | 11.3731479                            | 40.95862335  |                         |             |
| -1.833591983                        | 0.0482079                                         | 0.208292513                           | MT-TQ        | MT                      |             |
| 4329                                | 4400                                              | -                                     | 72           | Mt_tRNA mitochondrially |             |





|                                     |                                                                                                                  |             |             |                        |                |
|-------------------------------------|------------------------------------------------------------------------------------------------------------------|-------------|-------------|------------------------|----------------|
| 319                                 | 248                                                                                                              | 243         | 3.281009932 | 2.952192044            |                |
| 3.175115581                         | 5.549678376                                                                                                      |             | 4.772699919 | 3.537548314            |                |
| ENSG00000272068                     | 79.83808501                                                                                                      |             | 114.1643748 | 76.72444889            |                |
| 202.0138565                         | 86.75337894                                                                                                      |             | 185.4673947 | 90.24230288            |                |
| 158.0782101                         | -0.80884971                                                                                                      |             | 0.048430286 | 0.208896205            |                |
| AL365181.2                          | 1                                                                                                                | 156637783   | 156641004   | -                      | 3222           |
|                                     | lincRNA novel transcript                                                                                         |             | -           | 88                     | 129            |
| 195                                 | 76                                                                                                               | 215         | 1.337475452 | 1.897101708            | 66             |
| 1.274457173                         | 3.362955487                                                                                                      |             | 1.449891208 | 3.102729694            |                |
| ENSG00000135966                     | 1197.571275                                                                                                      |             | 1215.098345 | 938.1307615            |                |
| 1137.493407                         | 1551.287394                                                                                                      |             | 1633.838352 | 1116.933461            |                |
| 1440.873051                         | -0.366870497                                                                                                     |             | 0.048449584 | 0.208928498            |                |
| TGFBRAP1                            | 2                                                                                                                | 105264391   | 105330034   | -                      | 6005           |
|                                     | protein_coding transforming growth factor beta receptor associated protein 1 [Source:HGNC Symbol;Acc:HGNC:16836] |             |             |                        | -              |
|                                     | 1320                                                                                                             | 1373        | 807         | 1098                   | 1359           |
|                                     |                                                                                                                  |             |             | 1894                   | 10.76439443    |
|                                     | 10.83387864                                                                                                      | 8.361176083 | 10.1601793  | 13.91085441            |                |
|                                     | 14.66553738                                                                                                      |             |             |                        |                |
| ENSG00000174807                     | 427.315205                                                                                                       |             | 348.6880903 | 520.7962592            |                |
| 356.3731622                         | 291.0804162                                                                                                      |             | 282.9456069 | 432.2665182            |                |
| 310.1330618                         | 0.477855103                                                                                                      |             | 0.048473878 | 0.20895783             | CD248          |
| 11                                  | 66314487                                                                                                         |             | 66317044    | -                      | 2558           |
| protein_coding                      | CD248 molecule [Source:HGNC Symbol;Acc:HGNC:18219]                                                               |             |             |                        |                |
|                                     | -                                                                                                                | 471         | 394         | 448                    | 344            |
|                                     |                                                                                                                  |             |             | 255                    | 328            |
| 9.016729695                         | 7.298306911                                                                                                      |             | 10.89643219 | 7.472569209            |                |
| 6.12755193                          | 5.962169543                                                                                                      |             |             |                        |                |
| ENSG00000227848                     | 7.258007728                                                                                                      |             | 7.964956378 | 2.3249833              | 0              |
| 0                                   | 0                                                                                                                | 5.849315802 | 0           | 4.984931973            |                |
| 0.048481549                         | 1                                                                                                                | SUCLA2-AS1  | 13          | 48001389               |                |
| 48002552                            | +                                                                                                                | 552         | antisense   | SUCLA2 antisense RNA 1 |                |
| [Source:HGNC Symbol;Acc:HGNC:39965] |                                                                                                                  |             | -           | 8                      | 9              |
|                                     | 0                                                                                                                | 0           | 0.709707824 | 0.772555827            | 2              |
| 0.225422761                         | 0                                                                                                                | 0           | 0           |                        |                |
| ENSG00000198753                     | 272.1752898                                                                                                      |             | 247.7986429 | 325.497662             |                |
| 260.0280922                         | 138.1205112                                                                                                      |             | 154.4123891 | 281.8238649            |                |
| 184.1869975                         | 0.612654861                                                                                                      |             | 0.04848854  | 0.20895783             | PLXNB3         |
| X                                   | 153764196                                                                                                        |             | 153779346   | +                      | 7007           |
| protein_coding                      | plexin B3 [Source:HGNC Symbol;Acc:HGNC:9105]                                                                     |             |             |                        | -              |
|                                     | 300                                                                                                              | 280         | 280         | 251                    | 121            |
|                                     |                                                                                                                  |             |             | 179                    | 2.096610811    |
|                                     | 1.893443519                                                                                                      | 2.486181099 | 1.990460885 | 1.061452619            |                |
|                                     | 1.187823551                                                                                                      |             |             |                        |                |
| ENSG00000088832                     | 4366.598899                                                                                                      |             | 4523.210228 | 4403.51837             |                |
| 4114.866862                         | 3605.972685                                                                                                      |             | 3424.67701  | 4431.109166            |                |
| 3715.172186                         | 0.25437055                                                                                                       |             | 0.048491825 | 0.20895783             | FKBP1A         |
| 20                                  | 1368978                                                                                                          | 1393172     | -           | 2577                   | protein_coding |
| binding protein                     | 1A [Source:HGNC Symbol;Acc:HGNC:3711]                                                                            |             |             |                        | FK506          |
|                                     | 5111                                                                                                             | 3788        | 3972        | 3159                   | 3970           |
|                                     |                                                                                                                  |             |             | 91.45977459            | 4813           |
| 93.97620502                         | 91.45393536                                                                                                      |             | 85.64595669 | 75.34988044            |                |
| 71.63200483                         |                                                                                                                  |             |             |                        |                |
| ENSG00000213463                     | 1073.277893                                                                                                      |             | 1017.744426 | 873.0312291            |                |

|                        |                                 |                |                  |        |
|------------------------|---------------------------------|----------------|------------------|--------|
| 1552.916774            | 975.9755131                     | 1334.502603    | 988.0178493      |        |
| 1287.798297            | -0.382195423                    | 0.048574739    | 0.209253625      |        |
| SYNJ2BP 14             | 70366496                        | 70417061       | - 7031           |        |
| protein_coding         | synaptojanin 2 binding protein  | [Source:HGNC   |                  |        |
| Symbol;Acc:HGNC:18955] | -                               | 1183 1150      | 751 1499         | 855    |
| 1547                   | 8.239414098                     | 7.750097805    | 6.645530961      |        |
| 11.84667785            | 7.474744925                     | 10.23067371    |                  |        |
| ENSG00000100883        | 1507.851105                     | 1324.837744    | 1406.614896      |        |
| 1362.298571            | 1066.153368                     | 857.463211     | 1413.101249      |        |
| 1095.30505             | 0.368138723                     | 0.048584128    | 0.209253625      | SRP54  |
| 14                     | 34981957                        | 35029567       | + 3903           |        |
| protein_coding         | signal recognition particle 54  | [Source:HGNC   |                  |        |
| Symbol;Acc:HGNC:11301] | -                               | 1662 1497      | 1210 1315        | 934    |
| 994                    | 20.85264509                     | 18.17396511    | 19.28828727      |        |
| 18.72143978            | 14.70942462                     | 11.84183079    |                  |        |
| ENSG00000102879        | 97.07585336                     | 105.3144232    | 96.48680694      |        |
| 71.48182615            | 54.79160775                     | 36.2308399     | 99.62569451      |        |
| 54.16809127            | 0.882953491                     | 0.048613079    | 0.209327351      | COR01A |
| 16                     | 30182827                        | 30189076       | + 4871           |        |
| protein_coding         | coronin 1A                      | [Source:HGNC   |                  |        |
| Symbol;Acc:HGNC:2252]  | -                               |                |                  |        |
| 107                    | 119 83                          | 69 48          | 42 1.075707835   |        |
| 1.157591349            | 1.060148759                     | 0.787123729    | 0.605717984      |        |
| 0.400924115            |                                 |                |                  |        |
| ENSG00000198380        | 1499.685847                     | 1085.004058    | 1400.802438      |        |
| 1795.333402            | 1658.587626                     | 1551.887642    | 1328.497448      |        |
| 1668.60289             | -0.329001578                    | 0.048776781    | 0.209981133      | GFPT1  |
| 2                      | 69319769                        | 69387254       | - 8866           |        |
| protein_coding         | glutamine--fructose-6-phosphate | transaminase 1 |                  |        |
| [Source:HGNC           | Symbol;Acc:HGNC:4241]           | -              | 1653 1226        | 1205   |
| 1733                   | 1453 1799                       | 9.130063754    | 6.552230757      |        |
| 8.456023214            | 10.86132676                     | 10.07361265    | 9.434838151      |        |
| ENSG00000213923        | 929.9322401                     | 1362.007541    | 1322.915498      |        |
| 1377.838098            | 1426.864785                     | 1901.256456    | 1204.951759      |        |
| 1568.653113            | -0.381403019                    | 0.048805035    | 0.210047615      | CSNK1E |
| 22                     | 38290691                        | 38318084       | - 6246           |        |
| protein_coding         | casein kinase 1 epsilon         | [Source:HGNC   |                  |        |
| Symbol;Acc:HGNC:2453]  | -                               | 1025 1539      | 1138 1330        | 1250   |
| 2204                   | 8.036196898                     | 11.67516645    | 11.33566829      |        |
| 11.83209655            | 12.30142416                     | 16.40743258    |                  |        |
| ENSG00000237976        | 6.350756762                     | 8.849951531    | 2.3249833        | 0      |
| 0                      | 0 5.841897198                   | 0              | 4.983168835      |        |
| 0.048808748            | 1 AL391069.3                    | 1              | 151346967        |        |
| 151348027              | + 618                           | antisense      | novel transcript |        |
| -                      | 7 10                            | 2 0            | 0 0              |        |
| 0.554674561            | 0.766722072                     | 0.201348485    | 0 0              | 0      |
| ENSG00000143633        | 534.370819                      | 485.8623391    | 540.5586172      |        |
| 348.0854143            | 472.5776169                     | 336.4292277    | 520.2639251      |        |
| 385.6974196            | 0.433095583                     | 0.048815973    | 0.210047615      |        |
| C1orf131               | 1 231223763                     | 231241187      | -                | 5413   |
| protein_coding         | chromosome 1 open reading frame | 131            |                  |        |

|                                                       |                                                                                                        |                                       |             |             |
|-------------------------------------------------------|--------------------------------------------------------------------------------------------------------|---------------------------------------|-------------|-------------|
| [Source:HGNC Symbol;Acc:HGNC:25332]                   | -                                                                                                      | 589                                   | 549         | 465         |
| 336                                                   | 414                                                                                                    | 390                                   | 5.328512038 | 4.805745392 |
| 5.344680793                                           | 3.449159627                                                                                            | 4.701210248                           | 3.350098667 |             |
| ENSG00000108651                                       | 2938.585879                                                                                            | 2707.200173                           | 2590.031396 |             |
| 3263.300759                                           | 3336.580614                                                                                            | 3205.566692                           | 2745.272483 |             |
| 3268.482688                                           | -0.251392583                                                                                           | 0.048846411                           | 0.210089317 | UTP6        |
| 17                                                    | 31860899                                                                                               | 31901765                              | -           | 6450        |
| protein_coding                                        | "UTP6, small subunit processome component [Source:HGNC Symbol;Acc:HGNC:18279]"                         | -                                     | 3239        | 3059        |
| 3716                                                  | 24.59121104                                                                                            | 22.47223166                           | 2228        | 3150        |
| 27.13706549                                           | 27.85585293                                                                                            | 26.78841441                           | 21.49128178 | 2923        |
| ENSG00000128274                                       | 217.7402318                                                                                            | 180.5390112                           | 254.5856713 |             |
| 105.6687865                                           | 122.1396256                                                                                            | 186.3300338                           | 217.6216381 |             |
| 138.0461486                                           | 0.65216614                                                                                             | 0.04885697                            | 0.210089317 | A4GALT      |
| 22                                                    | 42692112                                                                                               | 42721298                              | -           | 3407        |
| protein_coding                                        | "alpha 1,4-galactosyltransferase (P blood group) [Source:HGNC Symbol;Acc:HGNC:18149]"                  | -                                     | 240         | 204         |
| 102                                                   | 107                                                                                                    | 216                                   | 3.449592474 | 2.837164223 |
| 3.999252527                                           | 1.663566177                                                                                            | 1.930451986                           | 2.947899244 |             |
| ENSG00000139350                                       | 989.8108039                                                                                            | 720.3860546                           | 811.4191716 |             |
| 628.8328764                                           | 730.55477                                                                                              | 572.7923261                           | 840.5386767 |             |
| 644.0599908                                           | 0.38513428                                                                                             | 0.048903177                           | 0.210089317 | NEDD1       |
| 12                                                    | 96907223                                                                                               | 96953777                              | +           | 4463        |
| protein_coding                                        | "neural precursor cell expressed, developmentally down-regulated 1 [Source:HGNC Symbol;Acc:HGNC:7723]" | -                                     |             | 1091        |
| 814                                                   | 698                                                                                                    | 607                                   | 640         | 664         |
| 8.64219296                                            | 9.73050505                                                                                             | 7.557425034                           | 11.97089295 | 8.814556124 |
| 6.917867039                                           |                                                                                                        |                                       |             |             |
| ENSG00000033011                                       | 470.8632513                                                                                            | 572.5918641                           | 354.5599532 |             |
| 641.2644983                                           | 683.7536051                                                                                            | 571.067048                            | 466.0050229 |             |
| 632.0283838                                           | -0.43720114                                                                                            | 0.048925193                           | 0.210089317 | ALG1        |
| 16                                                    | 5033923                                                                                                | 5087379                               | +           | 4553        |
| chitobiosyldiphosphodolichol beta-mannosyltransferase | [Source:HGNC Symbol;Acc:HGNC:18294]"                                                                   | -                                     | 519         | 647         |
| 662                                                   | 5.582110009                                                                                            | 6.733379171                           | 305         | 619         |
| 7.554488116                                           | 8.086796832                                                                                            | 6.76069521                            | 4.16782078  | 599         |
| ENSG00000163885                                       | 0                                                                                                      | 0                                     | 0           | 25.01653231 |
| 0                                                     | 8.338844104                                                                                            | -5.541089696                          | 0.048938569 |             |
| 0.210089317                                           | CFAP100                                                                                                | 3                                     | 126394939   | 126436556   |
| 3352                                                  | protein_coding                                                                                         | cilia and flagella associated protein |             | +           |
| 100                                                   | [Source:HGNC Symbol;Acc:HGNC:26842]"                                                                   | -                                     | 0           | 0           |
| 0                                                     | 0                                                                                                      | 29                                    | 0           | 0           |
| 0.402276818                                           |                                                                                                        |                                       | 0           | 0           |
| ENSG00000232282                                       | 0                                                                                                      | 0                                     | 0           | 25.01653231 |
| 0                                                     | 8.338844104                                                                                            | -5.541089696                          | 0.048938569 |             |
| 0.210089317                                           | MTND1P32                                                                                               | X                                     | 102785667   | 102786604   |
| +                                                     | 938                                                                                                    | processed_pseudogene                  | MT-ND1      | pseudogene  |
| [Source:HGNC Symbol;Acc:HGNC:42081]"                  | -                                                                                                      |                                       | 0           | 0           |
| 0                                                     | 0                                                                                                      | 29                                    | 0           | 0           |
| 1.437560654                                           |                                                                                                        |                                       | 0           | 0           |

|                                                                   |              |                                 |                         |                          |             |                |       |
|-------------------------------------------------------------------|--------------|---------------------------------|-------------------------|--------------------------|-------------|----------------|-------|
| ENSG00000188050                                                   | 0            | 0                               | 0                       | 0                        | 0           | 25.01653231    |       |
|                                                                   | 0            | 8.338844104                     | -5.541089696            | 0.048938569              |             |                |       |
| 0.210089317                                                       | RNF133       | 7                               | 122697712               | 122699156                | -           |                |       |
|                                                                   | 1445         | protein_coding                  | ring finger protein 133 | [Source:HGNC             |             |                |       |
| Symbol;Acc:HGNC:21154]                                            | -            | 0                               | 0                       | 0                        | 0           | 0              |       |
|                                                                   | 29           | 0                               | 0                       | 0                        | 0           | 0.933170861    |       |
| ENSG00000269014                                                   | 0            | 0                               | 0                       | 0                        | 0           | 25.01653231    |       |
|                                                                   | 0            | 8.338844104                     | -5.541089696            | 0.048938569              |             |                |       |
| 0.210089317                                                       | AC008622.1   | 19                              | 46826895                | 46828440                 |             |                |       |
|                                                                   | -            | 284                             | processed_pseudogene    | heterogeneous nuclear    |             |                |       |
| ribonucleoprotein A1-like 2 (HNRNPA1L2)                           |              | pseudogene                      |                         | -                        | 0           |                |       |
|                                                                   | 0            | 0                               | 0                       | 29                       | 0           | 0              | 0     |
|                                                                   | 0            | 0                               | 4.747999625             |                          |             |                |       |
| ENSG00000270617                                                   | 0            | 0                               | 0                       | 0                        | 0           | 25.01653231    |       |
|                                                                   | 0            | 8.338844104                     | -5.541089696            | 0.048938569              |             |                |       |
| 0.210089317                                                       | URGCP-MRPS24 | 7                               | 43866558                | 43906589                 |             |                |       |
|                                                                   | -            | 795                             | protein_coding          | URGCP-MRPS24 readthrough |             |                |       |
| [Source:HGNC Symbol;Acc:HGNC:49188]                               | -            | 0                               | 0                       | 0                        | 0           | 0              |       |
|                                                                   | 0            | 0                               | 29                      | 0                        | 0           | 0              | 0     |
|                                                                   | 1.696140747  |                                 |                         |                          |             |                |       |
| ENSG00000148356                                                   | 291.2275601  |                                 | 315.9432697             | 299.9228457              |             |                |       |
| 396.7759335                                                       | 348.1550076  |                                 | 504.6438415             | 302.3645585              |             |                |       |
| 416.5249275                                                       | -0.463571377 |                                 | 0.048944433             | 0.210089317              |             | LRSAM1         |       |
|                                                                   | 9            | 127451486                       | 127503501               | +                        | 4365        |                |       |
| protein_coding                                                    |              | leucine rich repeat and sterile |                         | alpha motif containing   |             |                |       |
| 1 [Source:HGNC Symbol;Acc:HGNC:25135]                             | -            |                                 |                         | 321                      | 357         | 258            |       |
|                                                                   | 383          | 305                             | 585                     | 3.601218462              | 3.875345335 |                |       |
| 3.677412132                                                       | 4.875583174  |                                 | 4.294997857             | 6.231644015              |             |                |       |
| ENSG00000101844                                                   | 433.6659617  |                                 | 419.4877026             | 462.6716767              |             |                |       |
| 535.5957119                                                       | 537.6426511  |                                 | 651.2924792             | 438.608447               |             |                |       |
| 574.843614                                                        | -0.391689844 |                                 | 0.048976049             | 0.210130969              |             | ATG4A          |       |
|                                                                   | X            | 108091668                       | 108154671               | +                        | 2927        |                |       |
| protein_coding                                                    |              | autophagy related 4A cysteine   |                         | peptidase [Source:HGNC   |             |                |       |
| Symbol;Acc:HGNC:16489]                                            | -            | 478                             | 474                     | 398                      | 517         | 471            |       |
|                                                                   | 755          | 7.99712451                      | 7.673297917             | 8.459938312              |             |                |       |
| 9.814764069                                                       | 9.891121688  |                                 | 11.99375705             |                          |             |                |       |
| ENSG00000215251                                                   | 431.8514598  |                                 | 415.947722              | 317.3602204              |             |                |       |
| 582.2142941                                                       | 445.181813   |                                 | 553.8142671             | 388.3864674              |             |                |       |
| 527.0701247                                                       | -0.439509209 |                                 | 0.048977895             | 0.210130969              |             |                |       |
| FASTKD5                                                           | 20           | 3146519                         | 3159897                 | -                        | 2874        | protein_coding | FAST  |
| kinase domains 5 [Source:HGNC Symbol;Acc:HGNC:25790]              | -            |                                 |                         |                          |             |                | 476   |
|                                                                   | 470          | 273                             | 562                     | 390                      | 642         | 8.110523229    |       |
| 7.748855013                                                       | 5.909935347  |                                 | 10.86579721             | 8.341136021              |             |                |       |
| 10.38674052                                                       |              |                                 |                         |                          |             |                |       |
| ENSG00000103148                                                   | 1698.373808  |                                 | 1494.756814             | 1444.977121              |             |                |       |
| 1764.254347                                                       | 1754.47294   |                                 | 2245.449435             | 1546.035914              |             |                |       |
| 1921.392241                                                       | -0.313836466 |                                 | 0.048989803             | 0.210131094              |             | NPRL3          |       |
|                                                                   | 16           | 84271                           | 138860                  | -                        | 6609        | protein_coding | "NPR3 |
| like, GATOR1 complex subunit [Source:HGNC Symbol;Acc:HGNC:14124]" |              |                                 |                         |                          |             |                |       |
|                                                                   | -            | 1872                            | 1689                    | 1243                     | 1703        | 1537           | 2603  |

|                                     |                                                        |             |             |        |
|-------------------------------------|--------------------------------------------------------|-------------|-------------|--------|
| 13.87071269                         | 12.10933624                                            | 11.70151849 | 14.31828293 |        |
| 14.29504332                         | 18.3134191                                             |             |             |        |
| ENSG00000159228                     | 1173.98275                                             | 1459.357007 | 1376.390113 |        |
| 1390.26972                          | 1824.103941                                            | 1834.833249 | 1336.576624 |        |
| 1683.06897                          | -0.332743825                                           | 0.049003007 | 0.210136773 | CBR1   |
| 21                                  | 36069941                                               | 36073166    | + 2450      |        |
| protein_coding                      | carbonyl reductase 1 [Source:HGNC                      |             |             |        |
| Symbol;Acc:HGNC:1548]               | -                                                      | 1294 1649   | 1184 1342   | 1598   |
| 2127                                | 25.86407051                                            | 31.89194542 | 30.06716387 |        |
| 30.43676388                         | 40.09203038                                            | 40.36755296 |             |        |
| ENSG00000179943                     | 567.0318537                                            | 731.0059965 | 764.9195056 |        |
| 717.926167                          | 932.5988236                                            | 1083.474641 | 687.6524519 |        |
| 911.3332105                         | -0.407433516                                           | 0.049030011 | 0.210179267 | FIZ1   |
| 19                                  | 55591371                                               | 55601970    | - 6790      |        |
| protein_coding                      | FLT3 interacting zinc finger 1 [Source:HGNC            |             |             |        |
| Symbol;Acc:HGNC:25917]              | zf-C2H2                                                | 625 826     | 658 693     | 817    |
| 1256                                | 4.507533121                                            | 5.764169112 | 6.029245473 |        |
| 5.67120706                          | 7.396046662                                            | 8.601038333 |             |        |
| ENSG00000173950                     | 710.3775064                                            | 591.1767623 | 730.0447561 |        |
| 366.7328472                         | 599.2832098                                            | 531.3856519 | 677.1996749 |        |
| 499.133903                          | 0.439960994                                            | 0.04903668  | 0.210179267 | XXYLT1 |
| 3                                   | 195068279                                              | 195271167   | - 5409      |        |
| protein_coding                      | xyloside xylosyltransferase 1 [Source:HGNC             |             |             |        |
| Symbol;Acc:HGNC:26639]              | -                                                      | 783 668     | 628 354     | 525    |
| 616                                 | 7.088812089                                            | 5.85175213  | 7.223530468 |        |
| 3.636623361                         | 5.966088374                                            | 5.295350957 |             |        |
| ENSG00000174004                     | 198.6879615                                            | 200.0089046 | 159.261356  |        |
| 323.2221704                         | 247.7037267                                            | 243.2642108 | 185.9860741 |        |
| 271.3967026                         | -0.543150919                                           | 0.049064912 | 0.21024644  | NRR0S  |
| 3                                   | 196639686                                              | 196662004   | + 2910      |        |
| protein_coding                      | negative regulator of reactive oxygen species          |             |             |        |
| [Source:HGNC Symbol;Acc:HGNC:24613] | -                                                      |             | 219 226     | 137    |
| 312                                 | 217 282                                                | 3.68535908  | 3.679949772 |        |
| 2.929101524                         | 5.957631659                                            | 4.583678041 | 4.50595798  |        |
| ENSG00000213024                     | 3093.725794                                            | 3378.911495 | 3102.690214 |        |
| 3665.256535                         | 4047.730023                                            | 3673.117055 | 3191.775834 |        |
| 3795.367871                         | -0.249633504                                           | 0.049076124 | 0.21024644  | NUP62  |
| 19                                  | 49906825                                               | 49929763    | - 6020      |        |
| protein_coding                      | nucleoporin 62 [Source:HGNC Symbol;Acc:HGNC:8066]      |             |             |        |
| -                                   | 3410 3818                                              | 2669 3538   | 3546 4258   |        |
| 27.73872987                         | 30.05148057                                            | 27.58410702 | 32.65678154 |        |
| 36.20675474                         | 32.88820599                                            |             |             |        |
| ENSG00000069849                     | 3496.545223                                            | 3843.53395  | 3738.573146 |        |
| 3395.904726                         | 3076.320477                                            | 2730.252578 | 3692.884106 |        |
| 3067.492594                         | 0.267893395                                            | 0.049170528 | 0.210599872 | ATP1B3 |
| 3                                   | 141876124                                              | 141926514   | + 2584      |        |
| protein_coding                      | ATPase Na+/K+ transporting subunit beta 3 [Source:HGNC |             |             |        |
| Symbol;Acc:HGNC:806]                | -                                                      | 3854 4343   | 3216 3278   | 2695   |
| 3165                                | 73.03783387                                            | 79.63862642 | 77.43376522 |        |
| 70.49015793                         | 64.1082055                                             | 56.95242531 |             |        |

|                        |                                                    |                                     |                |                      |             |              |
|------------------------|----------------------------------------------------|-------------------------------------|----------------|----------------------|-------------|--------------|
| ENSG00000197238        | 4.53625483                                         |                                     | 3.539980612    |                      | 9.299933199 | 0            |
| 0                      | 0                                                  |                                     | 5.792056214    | 0                    | 4.963470946 |              |
| 0.049256895            | 1                                                  | HIST1H4J                            |                | 6                    | 27824108    |              |
| 27824480               | +                                                  | 373                                 | protein_coding | histone cluster 1 H4 |             |              |
| family member j        | [Source:HGNC Symbol;Acc:HGNC:4785]                 |                                     |                |                      | -           | 5            |
| 4                      | 8                                                  | 0                                   | 0              | 0                    | 0.656432169 |              |
| 0.508133234            | 1.334406048                                        |                                     | 0              | 0                    | 0           |              |
| ENSG00000227308        | 1.814501932                                        |                                     | 0              | 0                    | 0           | 12.55641011  |
|                        | 20.70333709                                        | 0.604833977                         |                | 11.0865824           |             | -4.156087721 |
|                        | 0.049284529                                        | 0.211037046                         |                | AC009502.1           |             | 2            |
| 219685381              | 219737937                                          | +                                   | 2951           | lincRNA              |             |              |
| uncharacterized        | LOC105373886                                       | [Source:NCBI gene;Acc:105373886]    |                |                      |             | -            |
| 2                      | 0                                                  | 0                                   | 0              | 11                   | 24          | 0.033188641  |
| 0                      | 0                                                  | 0                                   | 0.229124134    |                      | 0.378157789 |              |
| ENSG00000108448        | 454.532734                                         |                                     | 672.5963164    |                      | 487.0840013 |              |
| 579.1063887            | 748.8186393                                        |                                     | 867.8148795    |                      | 538.0710172 |              |
| 731.9133025            | -0.443697094                                       |                                     | 0.049311218    |                      | 0.211100226 |              |
| TRIM16L 17             | 18697998                                           |                                     | 18736118       | +                    | 4329        |              |
| protein_coding         | tripartite motif containing 16 like                | [Source:HGNC                        |                |                      |             |              |
| Symbol;Acc:HGNC:32670] | -                                                  | 501                                 | 760            | 419                  | 559         | 656          |
| 1006                   | 5.667334201                                        |                                     | 8.318642246    |                      | 6.021896456 |              |
| 7.175237251            | 9.314587221                                        |                                     | 10.80541405    |                      |             |              |
| ENSG00000129473        | 398.2831741                                        |                                     | 369.0429789    |                      | 349.9099866 |              |
| 278.6755251            | 310.4857773                                        |                                     | 211.3465661    |                      | 372.4120465 |              |
| 266.8359562            | 0.483585231                                        |                                     | 0.049339055    |                      | 0.211168291 | BCL2L2       |
| 14                     | 23298790                                           |                                     | 23311759       | +                    | 4189        |              |
| protein_coding         | BCL2 like 2                                        | [Source:HGNC Symbol;Acc:HGNC:995]   |                |                      |             | -            |
| 439                    | 417                                                | 301                                 | 269            | 272                  | 245         | 5.131955046  |
| 4.716850759            | 4.470570848                                        |                                     | 3.568239227    |                      | 3.991222175 |              |
| 2.719485466            |                                                    |                                     |                |                      |             |              |
| ENSG00000196187        | 627.8176685                                        |                                     | 613.3016411    |                      | 435.9343687 |              |
| 520.0561844            | 287.6559407                                        |                                     | 375.2479847    |                      | 559.0178928 |              |
| 394.3200366            | 0.504083501                                        |                                     | 0.049400407    |                      | 0.211378644 |              |
| TMEM63A 1              | 225845536                                          |                                     | 225882369      | -                    | 10339       |              |
| protein_coding         | transmembrane protein 63A                          | [Source:HGNC                        |                |                      |             |              |
| Symbol;Acc:HGNC:29118] | -                                                  | 692                                 | 693            | 375                  | 502         | 252          |
| 435                    | 3.277602202                                        |                                     | 3.176004727    |                      | 2.256625955 |              |
| 2.697970679            | 1.498198527                                        |                                     | 1.956328311    |                      |             |              |
| ENSG00000169410        | 1262.893345                                        |                                     | 989.4245812    |                      | 1597.263527 |              |
| 862.9617563            | 1083.275745                                        |                                     | 998.0733754    |                      | 1283.193818 |              |
| 981.4369589            | 0.385996839                                        |                                     | 0.049412103    |                      | 0.211378644 | PTPN9        |
| 15                     | 75463251                                           |                                     | 75579289       | -                    | 8632        |              |
| protein_coding         | "protein tyrosine phosphatase, non-receptor type 9 | [Source:HGNC Symbol;Acc:HGNC:9661]" |                |                      |             |              |
| 833                    | 949                                                | 1157                                | 7.896897248    |                      | 6.137009742 | 1374         |
| 9.903350449            | 5.362232165                                        |                                     | 6.757750307    |                      | 6.232365939 |              |
| ENSG00000214425        | 378.3236528                                        |                                     | 163.7241033    |                      | 229.010855  |              |
| 202.0138565            | 134.6960357                                        |                                     | 141.4728034    |                      | 257.0195371 |              |
| 159.3942319            | 0.689812232                                        |                                     | 0.049427581    |                      | 0.211393732 |              |
| LRRC37A4P              | 17                                                 | 45506741                            |                | 45550335             | -           | 6924         |

|                                                                   |              |             |                |             |                      |
|-------------------------------------------------------------------|--------------|-------------|----------------|-------------|----------------------|
| transcribed_unprocessed_pseudogene                                |              |             |                |             | "leucine rich repeat |
| containing 37 member A4, pseudogene [Source:HGNC                  |              |             |                |             |                      |
| Symbol;Acc:HGNC:25479]" -                                         | 417          | 185         | 197            | 195         | 118                  |
| 164                                                               | 2.949223456  | 1.266021584 | 1.770174228    |             |                      |
| 1.564910829                                                       | 1.047544083  | 1.101330856 |                |             |                      |
| ENSG00000078070                                                   | 482.6575139  | 533.6520773 | 503.3588844    |             |                      |
| 446.5024213                                                       | 270.5335633  | 385.5996532 | 506.5561585    |             |                      |
| 367.5452126                                                       | 0.461692538  | 0.049449724 | 0.211437315    |             | MCCC1                |
| 3                                                                 | 183015218    | 183116075   | -              | 4321        |                      |
| protein_coding methylcrotonoyl-CoA carboxylase 1 [Source:HGNC     |              |             |                |             |                      |
| Symbol;Acc:HGNC:6936] -                                           | 532          | 603         | 433            | 431         | 237                  |
| 447                                                               | 6.029149454  | 6.612405625 | 6.23462701     |             |                      |
| 5.54249165                                                        | 3.371408985  | 4.810101879 |                |             |                      |
| ENSG00000148344                                                   | 39.01179154  | 77.87957347 | 132.5240481    |             |                      |
| 7.251779464                                                       | 11.41491828  | 69.87376267 | 83.13847103    |             |                      |
| 29.5134868                                                        | 1.480297181  | 0.049476826 | 0.211499265    |             | PTGES                |
| 9                                                                 | 129738331    | 129753047   | -              | 1896        |                      |
| protein_coding prostaglandin E synthase [Source:HGNC              |              |             |                |             |                      |
| Symbol;Acc:HGNC:9599] -                                           | 43           | 88          | 114            | 7           | 10                   |
| 81                                                                | 1.110602908  | 2.199230652 | 3.74087645     |             |                      |
| 0.205150108                                                       | 0.324197026  | 1.986450301 |                |             |                      |
| ENSG00000081154                                                   | 3443.924667  | 3477.145957 | 3852.497328    |             |                      |
| 3245.689295                                                       | 2865.144489  | 2903.643026 | 3591.189317    |             |                      |
| 3004.825603                                                       | 0.256983451  | 0.049488126 | 0.211499265    |             | PCNP                 |
| 3                                                                 | 101574095    | 101594437   | +              | 3102        |                      |
| protein_coding PEST proteolytic signal containing nuclear protein |              |             |                |             |                      |
| [Source:HGNC Symbol;Acc:HGNC:30023] -                             |              |             | 3796           | 3929        | 3314                 |
| 3133                                                              | 2510         | 3366        | 59.92569697    | 60.01594878 |                      |
| 66.46875698                                                       | 56.12167766  | 49.73696586 | 50.45489844    |             |                      |
| ENSG00000244462                                                   | 2336.171237  | 2272.667553 | 2180.834335    |             |                      |
| 2582.669458                                                       | 2681.364304  | 2837.21982  | 2263.224375    |             |                      |
| 2700.417861                                                       | -0.25478038  | 0.049545326 | 0.21169258     |             | RBM12                |
| 20                                                                | 35648925     | 35664956    | -              | 6702        |                      |
| protein_coding RNA binding motif protein 12 [Source:HGNC          |              |             |                |             |                      |
| Symbol;Acc:HGNC:9898] -                                           | 2575         | 2568        | 1876           | 2493        | 2349                 |
| 3289                                                              | 18.81488176  | 18.15586884 | 17.41547231    |             |                      |
| 20.66949655                                                       | 21.54398081  | 22.81867738 |                |             |                      |
| ENSG00000185651                                                   | 3130.923084  | 3546.175579 | 3639.761356    |             |                      |
| 3898.349446                                                       | 3839.97851   | 4756.591696 | 3438.953339    |             |                      |
| 4164.973217                                                       | -0.276741608 | 0.049598044 | 0.211866445    |             | UBE2L3               |
| 22                                                                | 21549447     | 21624034    | +              | 3838        |                      |
| protein_coding ubiquitin conjugating enzyme E2 L3 [Source:HGNC    |              |             |                |             |                      |
| Symbol;Acc:HGNC:12488] -                                          | 3451         | 4007        | 3131           | 3763        | 3364                 |
| 5514                                                              | 44.03202638  | 49.46987498 | 50.75571427    |             |                      |
| 54.48052595                                                       | 53.87637622  | 66.80251443 |                |             |                      |
| ENSG00000183813                                                   | 0            | 2.654985459 | 0              | 12.43162194 | 0                    |
| 26.7418104                                                        | 0.884995153  | 13.05781078 | -3.841063957   |             |                      |
| 0.049609973                                                       | 0.211866445  | CCR4        | 3              | 32951574    |                      |
| 32956349                                                          | +            | 3095        | protein_coding | C-C motif   |                      |
| chemokine receptor 4 [Source:HGNC Symbol;Acc:HGNC:1605] -         |              |             |                |             | 0                    |

|                                           |                                     |             |                                  |             |             |                |             |  |
|-------------------------------------------|-------------------------------------|-------------|----------------------------------|-------------|-------------|----------------|-------------|--|
|                                           | 3                                   | 0           | 12                               | 0           | 31          | 0              | 0.045929006 |  |
|                                           | 0                                   | 0.215443123 |                                  | 0           | 0.465727689 |                |             |  |
| ENSG00000272716                           | 11.79426256                         |             | 3.539980612                      |             | 2.3249833   |                | 0           |  |
|                                           | 0                                   | 0           | 5.886408823                      |             | 0           | 4.993613762    |             |  |
| 0.04961539                                | 1                                   | AL121658.1  |                                  | 2           | 32165046    |                |             |  |
| 32165757                                  | -                                   | 712         | lincRNA novel transcript         |             |             |                | -           |  |
|                                           | 13                                  | 4           | 2                                | 0           | 0           | 0              | 0.894112244 |  |
|                                           | 0.266199012                         |             | 0.174765961                      |             | 0           | 0              |             |  |
| ENSG0000047849                            | 7549.235288                         |             | 7326.874873                      |             | 8952.348196 |                |             |  |
| 7066.341104                               | 6885.478708                         |             | 5829.714668                      |             | 7942.819452 |                |             |  |
| 6593.844826                               | 0.26851153                          |             | 0.049625945                      |             | 0.2118835   |                | MAP4        |  |
|                                           | 3                                   | 47850690    |                                  | 48089272    | -           | 14943          |             |  |
| protein_coding                            | microtubule associated protein 4    |             | [Source:HGNC                     |             |             |                |             |  |
| Symbol;Acc:HGNC:6862]                     | -                                   | 8321        | 8279                             | 7701        | 6821        | 6032           |             |  |
|                                           | 6758                                | 27.26882401 |                                  | 26.25224973 |             | 32.06388731    |             |  |
| 25.36426586                               | 24.81252128                         |             | 21.0286508                       |             |             |                |             |  |
| ENSG00000246308                           | 15.42326642                         |             | 7.964956378                      |             | 12.78740815 |                | 0           |  |
|                                           | 0                                   | 3.450556181 |                                  | 12.05854365 |             | 1.150185394    |             |  |
| 3.316065466                               | 0.049659193                         |             | 0.211974293                      |             | AC116535.1  |                | 11          |  |
|                                           | 10809297                            | 10822931    |                                  | +           | 2335        | antisense      |             |  |
|                                           | uncharacterized LOC101928053        |             | [Source:NCBI gene;Acc:101928053] |             |             |                |             |  |
|                                           | -                                   | 17          | 9                                | 11          | 0           | 0              | 4           |  |
| 0.3565256                                 | 0.182634183                         |             | 0.29309786                       |             | 0           | 0              |             |  |
| 0.079653364                               |                                     |             |                                  |             |             |                |             |  |
| ENSG00000111203                           | 343.8481161                         |             | 370.8129692                      |             | 380.1347695 |                |             |  |
| 529.3799009                               | 409.7955663                         |             | 526.2098176                      |             | 364.9319516 |                |             |  |
| 488.4617616                               | -0.421921877                        |             | 0.049694392                      |             | 0.212025433 |                | ITFG2       |  |
|                                           | 12                                  | 2812622     | 2859791                          | +           | 6250        | protein_coding |             |  |
| integrin alpha FG-GAP repeat containing 2 |                                     |             | [Source:HGNC                     |             |             |                |             |  |
| Symbol;Acc:HGNC:30879]                    | -                                   | 379         | 419                              | 327         | 511         | 359            |             |  |
|                                           | 610                                 | 2.969531087 |                                  | 3.176584749 |             | 3.255176802    |             |  |
| 4.543106591                               | 3.530707917                         |             | 4.538170786                      |             |             |                |             |  |
| ENSG00000163961                           | 901.8074602                         |             | 993.849557                       |             | 804.4442217 |                |             |  |
| 804.9475205                               | 632.3864728                         |             | 667.682621                       |             | 900.0337463 |                |             |  |
| 701.6722048                               | 0.359780309                         |             | 0.049700153                      |             | 0.212025433 |                | RNF168      |  |
|                                           | 3                                   | 196468783   |                                  | 196503768   | -           | 5347           |             |  |
| protein_coding                            | ring finger protein 168             |             | [Source:HGNC                     |             |             |                |             |  |
| Symbol;Acc:HGNC:26661]                    | -                                   | 994         | 1123                             | 692         | 777         | 554            |             |  |
|                                           | 774                                 | 9.103426369 |                                  | 9.951671071 |             | 8.051981288    |             |  |
| 8.074634599                               | 6.368643528                         |             | 6.730724193                      |             |             |                |             |  |
| ENSG00000198912                           | 758.4618076                         |             | 841.6303906                      |             | 746.3196392 |                |             |  |
| 732.4297259                               | 527.3692246                         |             | 533.973569                       |             | 782.1372791 |                |             |  |
| 597.9241732                               | 0.387932203                         |             | 0.049707133                      |             | 0.212025433 |                |             |  |
| C1orf174                                  | 1                                   | 3889125     | 3900293                          | -           | 4388        | protein_coding |             |  |
|                                           | chromosome 1 open reading frame 174 |             | [Source:HGNC                     |             |             |                |             |  |
| Symbol;Acc:HGNC:27915]                    | -                                   | 836         | 951                              | 642         | 707         | 462            |             |  |
|                                           | 619                                 | 9.329714243 |                                  | 10.26928812 |             | 9.102805343    |             |  |
| 8.952922777                               | 6.47176467                          |             | 6.559263053                      |             |             |                |             |  |
| ENSG00000125388                           | 84.37433984                         |             | 147.7941906                      |             | 127.8740815 |                |             |  |
| 154.3593057                               | 301.3538426                         |             | 149.2365548                      |             | 120.014204  |                |             |  |



|                        |                                     |              |                       |        |
|------------------------|-------------------------------------|--------------|-----------------------|--------|
| 201.6499011            | -0.74682031                         | 0.049789335  | 0.212206361           | GRK4   |
| 4                      | 2963608 3040747                     | + 4686       | protein_coding        | G      |
| protein-coupled        | receptor kinase 4                   | [Source:HGNC | Symbol;Acc:HGNC:4543] |        |
| -                      | 93 167                              | 110 149      | 264 173               |        |
| 0.971872622            | 1.688653824                         | 1.460485493  | 1.766835138           |        |
| 3.462972181            | 1.716622644                         |              |                       |        |
| ENSG00000105953        | 3775.97852                          | 3462.986034  | 3701.373413           |        |
| 3156.596004            | 2938.199966                         | 3136.555569  | 3646.779323           |        |
| 3077.117179            | 0.244872801                         | 0.049795054  | 0.212206361           | OGDH   |
| 7                      | 44606572                            | 44709066     | + 5210                |        |
| protein_coding         | oxoglutarate dehydrogenase          | [Source:HGNC |                       |        |
| Symbol;Acc:HGNC:8124]  | -                                   | 4162 3913    | 3184 3047             | 2574   |
| 3636                   | 39.11947666                         | 35.58758893  | 38.02263253           |        |
| 32.49726221            | 30.36813906                         | 32.45018442  |                       |        |
| ENSG00000172123        | 17.23776835                         | 39.82478189  | 86.02438209           |        |
| 14.50355893            | 19.40536108                         | 18.11541995  | 47.69564411           |        |
| 17.34144665            | 1.454344453                         | 0.049797346  | 0.212206361           | SLFN12 |
| 17                     | 35411060                            | 35433283     | - 3560                |        |
| protein_coding         | schlafen family member 12           | [Source:HGNC |                       |        |
| Symbol;Acc:HGNC:25500] | -                                   | 19 45        | 74 14                 | 17     |
| 21                     | 0.261355887                         | 0.598947776  | 1.293268109           |        |
| 0.218519441            | 0.293525802                         | 0.274283899  |                       |        |
| ENSG00000128683        | 33.56828574                         | 43.3647625   | 32.5497662            |        |
| 118.1004084            | 65.06503421                         | 46.58250844  | 36.49427148           |        |
| 76.58265036            | -1.065849263                        | 0.049797535  | 0.212206361           | GAD1   |
| 2                      | 170813213                           | 170861151    | + 8242                |        |
| protein_coding         | glutamate decarboxylase 1           | [Source:HGNC |                       |        |
| Symbol;Acc:HGNC:4092]  | -                                   | 37 49        | 28 114                | 57     |
| 54                     | 0.219835486                         | 0.281701987  | 0.211364608           |        |
| 0.768571516            | 0.425098532                         | 0.304643676  |                       |        |
| ENSG00000156273        | 1691.115801                         | 1608.921188  | 1679.800434           |        |
| 2069.865053            | 2056.968274                         | 1871.926728  | 1659.945808           |        |
| 1999.586685            | -0.268392982                        | 0.049894783  | 0.21255814            | BACH1  |
| 21                     | 29194071                            | 29630751     | + 7717                |        |
| protein_coding         | BTB domain and CNC homolog 1        | [Source:HGNC |                       |        |
| Symbol;Acc:HGNC:935]   | TF_bZIP                             | 1864 1818    | 1445 1998             | 1802   |
| 2170                   | 11.82840242                         | 11.16276596  | 11.65000719           |        |
| 14.38662844            | 14.35336228                         | 13.07501668  |                       |        |
| ENSG00000198015        | 1795.449662                         | 1539.891566  | 1722.812625           |        |
| 1479.363011            | 1353.809308                         | 1302.584958  | 1686.051284           |        |
| 1378.585759            | 0.290493269                         | 0.049904119  | 0.21255814            | MRPL42 |
| 12                     | 93467488                            | 93516213     | + 16393               |        |
| protein_coding         | mitochondrial ribosomal protein L42 | [Source:HGNC |                       |        |
| Symbol;Acc:HGNC:14493] | -                                   | 1979 1740    | 1482 1428             | 1186   |
| 1510                   | 5.911749712                         | 5.029412423  | 5.624664353           |        |
| 4.840406241            | 4.447066362                         | 4.283014321  |                       |        |
| ENSG00000071282        | 388.3034134                         | 384.9728916  | 378.9722779           |        |
| 246.5605018            | 297.9293672                         | 301.9236658  | 384.082861            |        |
| 282.1378449            | 0.444840844                         | 0.049959803  | 0.212744091           | LMCD1  |
| 3                      | 8501707 8574673                     | + 9130       | protein_coding        | LIM    |

and cysteine rich domains 1 [Source:HGNC Symbol;Acc:HGNC:6633] -

|                 |                                     |             |                                     |             |             |             |
|-----------------|-------------------------------------|-------------|-------------------------------------|-------------|-------------|-------------|
| 428             | 435                                 | 326         | 238                                 | 261         | 350         | 2.295628855 |
| 2.257589207     |                                     | 2.221537605 |                                     | 1.448499078 |             | 1.757183392 |
| 1.782494855     |                                     |             |                                     |             |             |             |
| ENSG00000204792 | 9.07250966                          |             | 3.539980612                         |             | 4.6499666   | 0           |
| 0               | 0                                   | 5.754152291 | 0                                   |             | 4.958589462 |             |
| 0.049987213     | 1                                   | LINC01291   | 2                                   |             | 74918148    |             |
| 74938418        | +                                   | 4176        | lincRNA long intergenic non-protein |             |             |             |
| coding RNA 1291 | [Source:HGNC Symbol;Acc:HGNC:50358] |             |                                     |             | -           | 10          |
| 4               | 4                                   | 0           | 0                                   | 0           | 0.117264942 |             |
| 0.045386422     | 0.059594523                         | 0           | 0                                   | 0           | 0           |             |
